# Supplementary material for: Convergent evolution in Arabidopsis halleri and Arabidopsis arenosa on calamine metalliferous soils
Source: Philos Trans R Soc Lond B Biol Sci. 2019 Jun 3;374(1777):20180243. doi: 10.1098/rstb.2018.0243 (PMC6560266; doi:10.1098/rstb.2018.0243)
Supplement: Dataset S1 [file rstb20180243supp12.xlsx]

## Sheet: Field_soil_data
Dataset S1. Soil pH and concentrations of mineral elements in extractable and exchangeable fractions of soil adjacent to plant individuals sampled in the field.
Sample information					Extractable fraction of elements															Exchangeable fraction of elements															pH and proton concentration
Population	Species	Population_SoilType	Individual_No.		X_Al	X_B	X_Ca	X_Cd	X_Cr	X_Cu	X_Fe	X_K	X_Mg	X_Mn	X_Ni	X_P	X_Pb	X_S	X_Zn	CH_Al	CH_B	CH_Ca	CH_Cd	CH_Cr	CH_Cu	CH_Fe	CH_K	CH_Mg	CH_Mn	CH_Ni	CH_P	CH_Pb	CH_S	CH_Zn	pH	H+
Klet	A. arenosa	M	Klet_001_a07		630.438	37.4605	4891.43	12.0698	0.21175	17.3555	80.6575	49.9922	219.065	312.62	0.539	86.4903	3.9655	11.627	889.928	2.14425	0.15075	2199.75	0.70425	0.012	0.15971	3.21525	41.5725	88.875	21.075	0.0195	1.59	0.009	12.435	29.2875	5.95	1.12202e-06
Klet	A. arenosa	M	Klet_001_a08		209.438	35.5875	9571.88	22.4813	0.3	10.5998	16.6688	60	244.125	423.188	0.525	18.2437	0.225	12.7312	2298.75	2.1556	0.15436	2550	0.57664	0.01428	0.30796	4.37852	54.3456	99.688	22.882	0.01972	3.44964	0.0272	15.0824	29.9812	6.17	6.76083e-07
Klet	A. arenosa	M	Klet_001_a09		345.375	35.6437	8932.5	20.5312	0.225	26.2935	24.1313	50.0438	156.188	342.75	0.525	29.6812	0.975	13.35	1944.37	1.6515	0.12225	2805.75	0.33375	0.00975	0.24896	3.1275	39.6	61.815	5.62575	0.01425	1.26375	0.01425	12.51	8.07	6.63	2.34423e-07
Klet	A. arenosa	M	Klet_001_a10		280.83	35.594	7975.35	39.442	0.259	46.1565	32.3565	43.3085	194.99	494.135	0.5365	35.261	0.111	13.8195	2025.75	3.32925	0.1932	2850.39	0.57477	0.01104	0.66488	7.0656	38.4468	82.593	10.7502	0.01587	1.91544	0.02622	13.5999	17.5743	6.31	4.89779e-07
Klet	A. arenosa	M	Klet_005_a18		264.75	36.2063	5866.88	5.90625	0.20625	19.3373	47.6813	60.3938	154.819	222.188	0.5625	129.806	4.275	11.5875	690.375	1.92312	0.18	2522.88	0.1152	0.01152	0.1598	2.74176	44.3592	64.3896	10.6992	0.01224	2.77488	0.01152	10.6416	4.14792	6.3	5.01187e-07
Klet	A. arenosa	M	Klet_005_a19		434	20.78	6092	8.76	0.24	55.6535	87.34	101.4	121.84	189.94	0.44	196.58	6.9	7.78	926.4	0.5448	0.1344	1617.6	0.212	0.0064	0.11236	0.5344	43.68	43.528	2.4912	0.00084	1.044	0.0104	5.3688	2.1896	6.805	1.56675e-07
Klet	A. arenosa	M	Klet_005_a21		295.8	22.355	9290.5	17.3187	0.23375	26.7885	38.3775	89.08	129.391	239.487	0.5525	66.0025	2.4225	8.0325	2414	0.399	0.16632	2025.24	0.32676	0.00756	0.06644	0.27804	27.2916	40.8744	2.19996	0.00168	0.98028	0.01344	5.52804	3.62628	7.035	9.22571e-08
Klet	A. arenosa	M	Klet_005_a28		522.07	21.9743	6679.43	12.0143	0.249	35.3178	46.4178	113.378	175.234	218.498	0.39425	105.203	2.7805	7.65675	1016.96	0.5644	0.16849	2171.28	0.20833	0.0083	0.0996	0.4067	43.8821	64.5325	2.19203	0.00084	1.02256	0.00913	6.98943	2.68588	6.89	1.28825e-07
Klet	A. arenosa	M	Klet_005_a32		473.6	21.6	6122	9.38	0.4	11.9535	37.4	100.24	129.72	126.78	2.08	54.98	6.9	12.96	507	0.54352	0.18881	2805.29	0.20856	0.01027	0.11681	0.40053	46.4836	58.1361	2.49561	0.02607	1.15182	0.01264	9.9777	5.95107	6.36	4.36516e-07
				Klet A. arenosa mean	384.033	29.689	7269.11	16.4337	0.258306	27.7173	45.6701	74.204	169.486	285.509	0.683861	80.2497	3.17272	11.0605	1412.62	1.47283	0.162064	2394.24	0.362251	0.0101244	0.215169	2.46092	42.1846	67.1591	8.93455	0.0123344	1.68804	0.0148667	10.237	11.5015	6.49444	4.26418e-07
				Klet A. arenosa sd	131.204	7.19644	1609.8	9.66995	0.0565954	14.5304	22.5313	25.1448	40.2266	111.275	0.496399	53.6632	2.43216	2.38905	703.533	0.960392	0.0226169	396.38	0.194675	0.00229758	0.174437	2.18362	6.82353	18.6838	7.69613	0.00874641	0.828111	0.00655626	3.35718	10.6344	0.342389	3.10152e-07
Kowa	A. arenosa	NM	Kowa_001_a04		224.8	2.9824	1347.84	0.1152	0.112	11.5871	203.392	67.296	106.816	85.248	0.5184	48	3.6672	9.9168	8.9664	1.03806	0.21962	1053.07	0.00632	0.00869	0.11207	1.25926	61.3909	56.2638	10.2542	0.01975	1.39435	0.0158	8.9507	0.31442	5.61	2.45471e-06
Kowa	A. arenosa	NM	Kowa_001_a05		299.46	6.8376	2471.7	0.0882	0.1428	13.1877	194.796	72.114	113.274	127.512	0.5502	159.768	1.9068	5.754	4.8846	1.827	0.147	801.528	0.00168	0.00756	0.0026	3.55152	35.6076	42.5628	4.0488	0.0042	1.34148	0.00588	5.30292	0.04284	6.845	1.42889e-07
Kowa	A. arenosa	NM	Kowa_001_a06		1546.23	32.7257	8316.73	0.41475	0.632	25.4083	920.35	273.34	644.838	480.123	2.07375	766.893	7.3075	36.656	26.149	2.0999	0.16932	826.265	0.00415	0.00913	0.02158	4.30687	34.3122	49.4597	7.138	0.00913	1.4027	0.00581	5.84237	0.10956	6.44	3.63078e-07
Kowa	A. arenosa	NM	Kowa_001_a07		236.196	6.63795	3482.19	0.0891	0.1701	10.4733	164.025	116.316	81.1215	183.465	0.9558	194.967	2.56365	6.7554	4.6332	1.76043	0.15272	857.39	0.00249	0.00913	0.01494	2.95563	49.5427	27.307	4.74096	0.00913	1.4276	0.00581	5.78261	0.05063	6.95	1.12202e-07
Kowa	A. arenosa	NM	Kowa_001_a08		189.57	3.1879	857.325	0.0568	0.071	10.2124	68.9765	67.3435	57.9715	44.02	0.39405	86.8685	1.09695	8.77915	4.9132	1.9072	0.152	557.44	0.016	0.008	0.06436	2.2448	54.912	34.864	17.088	0.0608	2.0224	0.0192	6.1944	1.564	4.77	1.69824e-05
Kowa	A. arenosa	NM	Kowa_001_a09		314.212	3.5475	3629.63	0.06	0.16125	10.6747	152.625	103.162	91.0125	109.425	0.4875	167.512	1.85625	10.1288	5.69625	1.0387	0.1853	1015.75	0.00041	0.00595	0.04786	1.7408	38.233	23.7235	1.96435	0.0017	1.37445	0.01445	6.7898	0.05015	6.99	1.02329e-07
Kowa	A. arenosa	NM	Kowa_001_a11		570.91	3.4965	2150.44	0.0925	0.2368	9.9816	191.66	103.415	84.323	94.313	0.5143	86.987	4.2587	12.7798	5.9348	1.58424	0.21484	936.44	0.00082	0.00656	0.04758	1.90158	42.3694	27.0846	3.16684	0.00328	1.21606	0.01886	6.25086	0.03772	6.37	4.2658e-07
Kowa	A. arenosa	NM	Kowa_001_a12		442.745	3.44925	2464.84	0.08395	0.19345	14.11	228.563	138.7	118.807	127.677	0.8249	257.69	2.44185	17.1075	7.43505	1.29724	0.20418	725.946	0.00041	0.00574	0.05168	2.49936	36.4654	25.461	1.17834	0.00084	1.3202	0.0123	7.57434	0.04592	6.835	1.46218e-07
				Kowa A. arenosa mean	478.015	7.85811	3090.09	0.125062	0.214925	13.2044	265.548	117.711	162.27	156.473	0.789862	221.086	3.13736	13.4847	8.57656	1.5691	0.180622	846.729	0.004035	0.007595	0.0453338	2.55748	44.1041	35.8408	6.19744	0.0136037	1.43741	0.0122638	6.586	0.276905	6.35125	2.59131e-06
				Kowa A. arenosa sd	420.633	9.51023	2163.32	0.110856	0.164428	4.81621	251.536	63.4789	183.321	127.936	0.516271	215.787	1.83915	9.36558	6.78345	0.376936	0.0276688	150.019	0.00491104	0.00128914	0.0319797	0.941455	9.4149	11.4716	4.93684	0.0187247	0.229475	0.00539632	1.1023	0.494216	0.733343	5.48963e-06
Mias	A. arenosa	M	Mias_001_a18		126.92	20.94	544.8	10.58	0.2	5.4735	110.68	78.56	78.34	27.22	0.42	18.94	768.4	28.56	619.8	0.4088	0.2256	317.84	3.468	0.0024	0.05316	0.1872	30.44	26.736	0.8352	0.00084	17.544	2.552	45.368	72.008	6.4	3.98107e-07
Mias	A. arenosa	M	Mias_003_a10		185.493	21.798	106.155	6.615	0.126	2.1585	77.868	55.272	11.865	3.045	0.231	36.687	292.32	9.492	99.246	2.08656	0.15228	89.019	4.72635	0.0012	0.04307	1.07325	11.5668	9.1611	0.64395	0.02349	1.78362	7.39206	3.73491	63.1557	4.96	1.09648e-05
Mias	A. arenosa	M	Mias_003_a09		401.098	40.172	208.537	12.2633	0.1245	8.6955	172.142	37.3915	25.7093	9.93925	0.35275	73.6625	821.285	14.6287	187.954	14.448	0.18312	181.44	10.0296	0.00588	0.137	5.87076	37.2204	18.9168	2.982	0.07728	3.43728	34.9356	7.34244	144.816	4.04	9.12011e-05
Mias	A. arenosa	M	Mias_003_a11		183.708	38.976	74.193	1.365	0.105	1.1085	92.82	8.274	12.957	1.722	0.21	28.56	163.38	8.106	33.768	19.7965	0.15725	60.9195	0.8789	0.0119	0.04956	19.3545	8.6275	8.06905	0.61965	0.01105	5.32525	18.4365	4.5951	20.774	4.72	1.90546e-05
Mias	A. arenosa	M	Mias_003_a13		214.2	40.8637	219.3	8.35125	0.14875	3.09475	97.6863	11.1562	25.9675	17.3825	0.40375	38.7812	426.488	12.835	403.962	3.9224	0.136	166.88	4.0816	0.0048	0.02836	4.3608	17.424	15.064	1.9856	0.0592	2.6264	4.5816	4.5792	211.12	5.18	6.60693e-06
Mias	A. arenosa	M	Mias_003_a15		123.144	41.0762	112.051	1.36	0.10625	0.07725	64.2812	13.7063	17.9988	5.8225	0.27625	17.2762	37.655	7.45875	112.816	8.6445	0.16745	106.165	0.96475	0.00765	0.00366	12.9455	17.238	14.1185	2.14625	0.0425	3.6346	1.53255	5.3244	80.512	4.92	1.20226e-05
Mias	A. arenosa	M	Mias_003_a16		189.717	38.6988	312.703	5.063	0.1245	2.78175	85.9465	19.7955	50.1943	23.6343	0.3735	29.5065	388.648	12.5953	391.968	4.62057	0.1827	280.14	2.30028	0.00783	0.01484	7.39413	20.9322	26.5263	1.61646	0.02349	2.46036	4.21341	5.78376	131.979	5.98	1.04713e-06
				Mias A. arenosa mean	203.468	34.6464	225.391	6.51393	0.133571	3.34139	100.203	32.0222	31.8617	12.6808	0.323893	34.7734	414.025	13.3822	264.216	7.7039	0.172057	171.772	3.7785	0.00595143	0.0470929	7.31231	20.4927	16.9417	1.54702	0.0339786	5.25879	10.5205	10.9611	103.481	5.17143	2.0185e-05
				Mias A. arenosa sd	86.5091	8.44008	151.134	3.93071	0.0303029	2.68929	32.3779	24.5516	22.4192	9.41859	0.0781737	17.547	270.325	6.66438	196.886	6.55938	0.0268174	89.9504	2.89514	0.00334492	0.0403909	6.29327	9.40686	6.9944	0.827877	0.02515	5.12312	11.2623	14.0864	58.6656	0.732421	2.96126e-05
Zakopane(Zapa)	A. arenosa	NM	Zapa_002_a01		2.3868	0.8704	8935.2	0.136	0.0476	7.5479	1.2614	28.1588	3369.4	18.36	0.068	2.5194	0.0952	9.0202	3.2946	0.75482	0.12191	1460	0.01314	0.00584	0.10106	0.55845	18.3595	242.433	0.47158	0.0073	0.96141	0.01387	6.75104	0.10804	7.105	7.85236e-08
Zakopane(Zapa)	A. arenosa	NM	Zapa_002_a02		4.08375	3.75375	7548.75	0.13125	0.04875	7.521	1.64625	38.4375	3252	22.8825	0.07125	4.14375	0.04	12.0562	3.5475	8.611	0.15168	1617.92	0.01896	0.01975	0.02675	6.15489	40.0451	374.618	1.5405	0.02449	2.62201	0.07584	11.3602	0.44714	6.995	1.01158e-07
Zakopane(Zapa)	A. arenosa	NM	Zapa_002_a03		7.08375	6.285	15048.8	0.105	0.0675	7.50225	2.88375	43.95	6116.25	46.95	0.08625	3.315	0.04	11.0287	2.76	2.73	0.15522	2028.78	0.00858	0.01248	0.00812	2.18088	20.1552	255.372	1.4391	0.01716	1.74174	0.01326	9.0714	0.13182	6.95	1.12202e-07
Zakopane(Zapa)	A. arenosa	NM	Zapa_002_a04		2.54535	0.76325	11125.7	0.08875	0.0497	7.47885	1.1999	27.8568	2170.12	17.9133	0.07455	1.7963	0.0923	8.1934	1.7963	0.9072	0.1344	2138.4	0.008	0.0096	0.08116	0.7424	21.976	131.2	0.4496	0.0104	0.904	0.0144	6.5168	0.0624	7	1e-07
Zakopane(Zapa)	A. arenosa	NM	Zapa_002_a05		3.6375	0.73125	9292.5	0.0825	0.04875	7.3935	1.42875	32.1713	3080.62	19.4625	0.08625	1.3575	0.0825	10.9538	1.38	1.04	0.132	1855.2	0.012	0.0096	0.05316	0.8776	20.776	181.68	0.4256	0.008	0.7976	0.0112	6.1448	0.0568	7.1	7.94328e-08
Zakopane(Zapa)	A. arenosa	NM	Zapa_002_a07		5.0427	6.5247	10319.4	0.1131	0.0624	7.4268	2.5467	20.3073	2877.03	27.3234	0.0819	2.5896	0.04	9.4107	3.4398	3.20625	0.147	2046.75	0.01275	0.0165	0.03596	2.72175	23.7075	176.1	1.19925	0.0225	1.8	0.02325	8.2425	0.20625	7.04	9.12011e-08
Zakopane(Zapa)	A. arenosa	NM	Zapa_004_a11		24.0975	32.5012	NA	0.26325	0.26325	0.04	6.9255	106.475	5554.57	65.529	0.62775	8.1405	0.04	49.3695	1.9845	2.23272	0.147	1390.2	0.00336	0.0084	0.01352	1.18188	26.1828	70.8204	0.19824	0.00672	1.08108	0.001035	5.27436	0.03612	7.38	4.16869e-08
Zakopane(Zapa)	A. arenosa	NM	Zapa_008_a19		6.488	4.24	9812	0.1	0.064	7.4015	2.708	73.6	3026.4	35.404	0.12	3.008	0.04	16.376	6.98	11.0033	0.18249	97.944	4.34896	0.00924	0.0817	10.5413	12.4586	10.7877	1.61007	0.02772	3.68368	11.1727	4.75783	59.7905	7.01	9.77237e-08
				Zapa A. arenosa mean	6.92067	6.9587	10297.5	0.127481	0.0814938	6.53897	2.57503	46.3695	3680.8	31.7281	0.151994	3.35876	0.05875	15.8011	3.14784	2.78314	0.141316	1791.04	0.01097	0.0117386	0.0456757	2.05969	24.4574	204.603	0.817696	0.0137957	1.41541	0.0218364	7.62301	0.149796	7.0725	8.7741e-08
				Zapa A. arenosa sd	6.6831	9.90555	2201.23	0.0542112	0.0691065	2.45695	1.76187	27.336	1296.15	15.8326	0.18045	1.97954	0.0244338	12.9043	1.63584	2.53886	0.0111903	279.518	0.0045548	0.00451173	0.0322481	1.82759	6.78148	90.6621	0.51366	0.00695734	0.617762	0.0228552	1.93219	0.13249	0.126293	2.03569e-08
Klet	A. halleri	M	Klet_002_h01		513.63	36.6795	4859.4	42.861	0.234	119.915	86.385	68.1525	183.144	360.555	0.468	57.915	1.4625	10.647	NA	2.19527	0.14168	1864.17	2.3023	0.01001	0.60992	4.60691	64.1641	73.4811	12.7435	0.01001	1.14499	0.01617	9.4479	52.129	6.265	5.4325e-07
Klet	A. halleri	M	Klet_002_h04		423.93	20.7675	4297.8	16.9845	0.195	31.521	46.371	130.669	167.076	203.58	0.702	112.69	4.1925	8.2095	1549.47	0.35998	0.17384	1769.56	0.69454	0.00656	0.11728	0.20008	52.07	64.1814	3.29722	0.00656	1.31282	0.01804	5.61618	25.9776	6.365	4.31519e-07
Klet	A. halleri	M	Klet_002_h16		499.5	36.9	4554.38	19.2188	0.1875	19.8623	40.8	105.056	256.688	326.25	0.76875	65.2688	2.30625	9.39375	2923.12	4.4728	0.2024	2150.4	0.8576	0.012	0.14756	8.816	91.52	132.4	10.28	0.0232	1.5312	0.028	9.128	67.664	6.07	8.51138e-07
Klet	A. halleri	M	Klet_006_h23		358.353	21.8498	6839.2	9.794	0.31125	48.7845	204.782	77.6673	144.793	247.133	0.581	162.659	25.0868	20.8745	488.87	0.48924	0.14094	2640.6	0.1134	0.0081	0.12893	0.54108	20.0232	48.1545	0.95904	0.00243	0.78003	0.02025	6.54804	1.17774	6.9	1.25893e-07
Klet	A. halleri	M	Klet_006_h25		399.75	36.8745	3997.5	6.864	0.2145	86.2185	76.947	76.128	156.117	214.305	0.8385	275.535	9.555	11.4465	620.88	1.4299	0.16511	1893.63	0.37525	0.01185	0.93288	1.73879	64.3297	86.979	16.5031	0.03318	1.41094	0.01027	11.5103	17.301	6.37	4.2658e-07
Klet	A. halleri	M	Klet_006_h27		548.93	33.813	15759	7.429	0.34	38.2635	28.458	235.11	532.95	531.08	1.377	75.378	4.267	30.345	671.5	2.0076	0.1701	2362.5	0.1232	0.0126	0.49316	2.8658	111.16	113.05	14.693	0.0287	2.457	0.1239	23.352	3.0898	6.34	4.57088e-07
Klet	A. halleri	M	Klet_006_h29		592.4	37.6	2950	7.22	0.16	39.6135	194.76	78.3	179.06	216.6	0.6	107.26	4.08	7	931.2	3.98786	0.15984	1662.78	0.84434	0.01184	0.28646	7.1151	56.7654	77.552	22.9252	0.03182	1.04192	0.02294	7.27864	51.5854	5.7	1.99526e-06
Klet	A. halleri	M	Klet_006_h30		678.2	37.32	3092	11.62	0.16	69.2935	181.36	32.96	165.14	217.8	0.42	103.46	3.08	5.48	1062.2	1.94724	0.14418	1608.66	0.95256	0.00972	0.18806	3.08853	30.7962	67.9509	8.05464	0.01215	0.85617	0.00648	4.77819	14.8473	6.23	5.88844e-07
Klet	A. halleri	M	Klet_007_h31		601.19	38.9865	6160.03	20.619	0.21725	25.7835	37.5843	61.62	173.385	305.335	0.49375	120.732	2.3305	17.933	1258.87	1.68168	0.19558	2248.4	0.42658	0.01001	0.14099	2.66035	38.0226	55.0088	4.69777	0.00847	0.81851	0.00385	11.0418	10.1101	6.47	3.38844e-07
				Klet A. halleri mean	512.876	33.4212	5834.37	15.8456	0.224389	53.2505	99.7163	96.1848	217.595	291.404	0.694333	120.1	6.26228	13.481	1188.26	2.06351	0.165963	2022.3	0.743308	0.0102989	0.33836	3.51474	58.7612	79.862	10.4615	0.0173911	1.26151	0.0277667	9.85567	27.098	6.30111	6.39824e-07
				Klet A. halleri sd	98.6133	6.60343	3708.52	10.779	0.0593186	30.8406	68.871	55.3886	115.464	100.147	0.275051	62.6648	7.01193	7.61259	733.595	1.31104	0.0211148	328.524	0.625122	0.00189403	0.267611	2.71979	27.1631	25.7535	6.63013	0.0111644	0.49228	0.034772	5.2528	22.7448	0.301596	5.13243e-07
Kowa	A. halleri	NM	Kowa_002_h13		604.95	3.9849	3138.34	0.2997	0.1443	32.7551	66.304	74.629	146.002	100.899	1.4689	96.718	10.2416	10.6338	29.6111	1.18974	0.27413	1486.78	0.01027	0.0079	0.15473	1.33905	43.1498	77.3568	3.80227	0.03397	1.25926	0.01817	9.401	0.65096	5.9	1.25893e-06
Kowa	A. halleri	NM	Kowa_002_h14		614.4	4.164	3318.4	0.316	0.168	17.0215	119.16	64.92	163.64	131.36	1.636	192.64	15.8	11.384	44.44	5.908	0.2312	1504.8	0.0136	0.0176	0.04676	9.704	38.16	78.792	6.0272	0.04	2.9208	0.088	10.368	1.3064	6.255	5.55904e-07
Kowa	A. halleri	NM	Kowa_002_h17		1374.28	3.2572	2054.62	0.1802	0.2142	11.9305	52.428	102	127.704	63.104	0.9656	95.37	6.5416	13.838	14.9532	2.06892	0.18312	1050.84	0.01176	0.00756	0.04376	1.56912	57.6912	68.9808	5.13324	0.0336	1.48764	0.0168	7.47096	0.84588	5.42	3.80189e-06
Kowa	A. halleri	NM	Kowa_002_h18		792.61	3.6582	3979.8	0.25125	0.2144	11.5586	60.099	72.2595	182.776	107.87	1.0452	154.77	7.5978	13.1152	23.0011	1.56408	0.17708	1751.8	0.00304	0.00836	0.11092	1.919	57.6612	68.514	1.90456	0.00836	1.36116	0.01368	7.106	0.13604	6.44	3.63078e-07
Kowa	A. halleri	NM	Kowa_002_h21		285.646	3.2338	813.2	0.1634	0.1102	7.6621	49.628	61.864	45.182	18.6238	0.3344	204.934	2.964	8.645	185.63	14.1525	0.15215	195.67	0.10455	0.0085	0.02321	2.61205	43.571	21.7345	10.013	0.1207	1.67535	0.06035	2.94185	142.885	4.2	6.30957e-05
				Kowa A. halleri mean	734.377	3.65962	2660.87	0.24211	0.17022	16.1856	69.5238	75.1345	133.061	84.3714	1.09002	148.886	8.629	11.5232	59.5271	4.97665	0.203536	1197.98	0.028644	0.009984	0.075876	3.42864	48.0466	63.0756	5.37605	0.047326	1.74084	0.0394	7.45756	29.1649	5.643	1.38151e-05
				Kowa A. halleri sd	359.269	0.375093	1111.87	0.0614622	0.0404111	8.80241	25.4992	14.2177	47.5932	39.5179	0.453893	46.208	4.2787	1.84322	63.7895	4.88886	0.0436029	549.643	0.0381216	0.00382261	0.0491913	3.16702	8.08966	21.0926	2.70231	0.0382689	0.606099	0.0297451	2.55981	56.8613	0.800972	2.46709e-05
Mias	A. halleri	M	Mias_002_h20		80.9535	22.5983	157.144	8.0475	0.15225	7.08375	62.7922	61.2045	28.0357	17.313	0.32625	21.6847	1047.26	31.8855	413.033	0.83592	0.17372	120.83	6.26682	0.0012	0.05644	0.62092	18.3352	11.0768	1.8877	0.03182	1.60132	17.1828	5.40166	184.728	5.59	2.5704e-06
Mias	A. halleri	M	Mias_004_h02		217.6	40.8637	151.555	8.9675	0.14875	3.09475	80.3038	5.63125	17.6587	6.01375	0.2975	37.1025	410.337	10.1575	149.77	5.30868	0.22327	1889.91	0.00332	0.01577	0.01079	4.48615	64.989	208.33	0.85158	0.01328	1.52803	0.01245	12.2508	0.2158	4.96	1.09648e-05
Mias	A. halleri	M	Mias_004_h06		228.437	40.885	191.781	5.92875	0.1275	1.1185	44.285	8.6275	35.3388	10.9437	0.31875	19.5287	235.45	11.305	315.775	11.7777	0.17098	109.726	2.01607	0.00747	0.0013	4.56251	13.8942	13.529	0.63495	0.01826	2.24349	1.99698	4.13838	98.438	5.65	2.23872e-06
Mias	A. halleri	M	Mias_004_h07		238.98	39.123	457.8	7.077	0.168	3.0195	121.842	27.195	62.433	35.805	0.504	24.759	412.44	14.154	438.69	5.99845	0.20485	335.835	3.78505	0.00765	0.01981	9.945	22.4145	33.116	4.981	0.0612	2.53215	3.97545	6.3036	163.285	5.52	3.01995e-06
Mias	A. halleri	M	Mias_004_h08		141.24	20.82	142.02	7.06	0.1	1.1735	39.02	59.5	20.22	7.54	0.26	21.62	165.72	7.66	233.8	0.5224	0.152	113.44	3.804	0.0012	0.02676	0.2008	12.672	11.504	0.8016	0.0368	1.5896	1.0776	3.116	129.36	5.4	3.98107e-06
				Mias A. halleri mean	181.442	32.858	220.06	7.41615	0.1393	3.098	69.6486	32.4317	32.7373	15.5231	0.3413	24.939	454.242	15.0324	310.213	4.78362	0.175388	169.958	3.96799	0.00438	0.0260775	3.83231	16.829	17.3065	2.07631	0.03702	1.99164	6.05821	4.73991	143.953	5.424	4.55498e-06
				Mias A. halleri sd	60.8946	9.14277	120.051	1.02562	0.0235135	2.16862	29.8868	23.9704	16.0919	10.8599	0.0845393	6.3065	311.918	8.68112	108.342	4.58626	0.0189553	95.8526	1.51286	0.00318064	0.0198466	3.91788	3.85228	9.17453	1.74465	0.0155217	0.409135	6.50758	1.21264	32.8668	0.246463	3.25806e-06
Zakopane(Zako)	A. halleri	NM	Zako_002_h01		444.5	3.857	4217.5	0.644	0.133	8.616	38.64	154.105	252.035	192.535	1.435	5.985	1.855	8.82	31.9865	2.56749	0.27117	1762.26	0.0414	0.01794	0.05216	2.92491	99.498	135.447	35.4315	0.05313	1.75191	0.00207	13.9242	1.72638	5.2	6.30957e-06
Zakopane(Zako)	A. halleri	NM	Zako_002_h02		590.625	3.8025	2646	0.525	0.15375	8.76975	53.025	154.913	205.2	126.15	1.8375	3.6	3.01125	8.58375	13.7363	2.0145	0.2115	1515	0.0615	0.0195	0.02471	1.88775	102.75	123.075	37.6875	0.12225	1.662	0.01425	12.24	1.4115	5.06	8.70964e-06
Zakopane(Zako)	A. halleri	NM	Zako_002_h03		263.37	5.712	4740	0.603	0.087	8.4015	51.36	121.65	285.63	105.63	1.347	7.716	1.566	11.349	28.383	3.8376	0.2496	1670.4	0.0246	0.0174	0.10196	4.2738	86.4	139.44	12.18	0.042	2.0952	0.0072	17.214	0.8628	5.28	5.24807e-06
Zakopane(Zako)	A. halleri	NM	Zako_002_h04		493.5	5.9395	2968.7	0.595	0.1295	9.3965	51.38	118.825	198.94	170.835	2.1	5.782	2.2715	9.786	19.362	2.0496	0.2065	1594.6	0.0756	0.0196	0.05706	1.7976	82.18	116.62	56.693	0.1519	1.3013	0.001035	15.4	1.9677	4.88	1.31826e-05
Zakopane(Zako)	A. halleri	NM	Zako_002_h06		96.579	6.8401	9646.95	0.63875	0.1314	7.64955	4.42745	89.498	1898	174.945	0.77015	6.01155	0.073	15.8009	16.9615	1.4609	0.1722	2016	0.0049	0.0119	0.05426	1.5918	54.194	228.2	2.2806	0.0161	1.3426	0.001035	16.177	0.0616	6.78	1.65959e-07
Zakopane(Zako)	A. halleri	NM	Zako_002_h07		413.625	6.77625	4057.5	0.495	0.1275	8.4435	16.95	62.8125	281.775	119.4	1.65	4.83	2.1375	9.8475	11.6625	1.82427	0.26207	1881.21	0.01314	0.01241	0.03755	2.3579	35.1422	144.613	4.21575	0.02774	1.11398	0.001035	15.4322	0.14454	5.96	1.09648e-06
Zakopane(Zako)	A. halleri	NM	Zako_002_h08		5171.25	36.4125	20171.2	4.3875	1.6125	6.4935	977.625	988.125	1626.75	1605.38	23.85	31.6125	58.425	87.5625	76.725	2.55966	0.24272	1363.08	0.09546	0.02146	0.0245	1.78636	65.2384	103.748	63.936	0.30858	1.05672	0.00592	14.5484	1.57176	4.89	1.28825e-05
				Zapa A. halleri mean	1067.64	9.90569	6921.13	1.12689	0.339236	8.2529	170.487	241.418	678.333	356.41	4.71281	9.36244	9.90561	21.6785	28.4024	2.33057	0.230823	1686.08	0.0452286	0.0171729	0.0503143	2.3743	75.0575	141.592	30.3463	0.1031	1.47482	0.00464929	14.9908	1.10661	5.43571	6.79925e-06
				Zapa A. halleri sd	1681.95	10.8822	5820.67	1.33213	0.520135	0.863938	329.974	306.368	690.13	510.773	7.82235	9.1572	19.8254	26.9925	20.8938	0.714269	0.0327327	205.266	0.031183	0.00339778	0.0245434	0.881463	22.8927	37.7039	22.999	0.0959528	0.348321	0.0045691	1.49342	0.708316	0.644712	4.78943e-06
substituted zero-values with minimum non-zero value divided by 2
X_Ca and X_Zn; numbers out of range or set to linear calibration to estimate value
Two samples ommitted for exchangeable elements analysis and mean, sd calculations due to outliers
