# Supplementary material for: Convergent evolution in Arabidopsis halleri and Arabidopsis arenosa on calamine metalliferous soils
Source: Philos Trans R Soc Lond B Biol Sci. 2019 Jun 3;374(1777):20180243. doi: 10.1098/rstb.2018.0243 (PMC6560266; doi:10.1098/rstb.2018.0243)
Supplement: Dataset S3 [file rstb20180243supp14.xlsx]

## Sheet: Classical_genome_scans
Dataset S3. Candidate genes Klet vs. Kowa in Arabidopsis halleri. Gene_description															Genome_scans
AL_ID	AT_ID	OrthoGroup	symbol	locus_type	note	full_name	description	curator_summary	computational_description	Scaffold	Gene_start	Gene_end	Gene_size	Gene_strand	Scaffold	Window_start	Window_end	Window_width	Window_strand	Fst	DD	Nielsen	Dxy	Flk	Flk_pvalue	VarLD	Allele_Frequency_Difference	Absolut_Allele_Frequency_Difference	Pi_Klet	Pi_Kowa	Allele_Frequency_Klet	Allele_Frequency_Kowa	TajimasD_Klet	TajimasD_Kowa	FayandWusH_Klet	FayandWusH_Kowa	Rank_in_outlier_metric	MODIFIER_effect_SNP_in_window	MODERATE_effect_SNP_in_window	HIGH_effect_SNP_in_window	Allele_Frequency_HIGH_effect_SNP_in_gene_Klet	Allele_Frequency_HIGH_effect_SNP_in_gene_Kowa	Allele_Frequency_Plot	Metrics_Plot	TajimasD_Klet_nearest_window	TajimasD_Kowa_nearest_window	FayandWusH_Klet_nearest_window	FayandWusH_Kowa_nearest_window	TajimasD_Klet_nearest_window_standardized
AL1G14010	AT1G04400	OG0004982	CRY2	protein_coding	cryptochrome 2	cryptochrome 2	cryptochrome 2 (CRY2)%3B FUNCTIONS IN: protein homodimerization activity%2C blue light photoreceptor activity%3B INVOLVED IN: in 9 processes%3B LOCATED IN: nucleus%2C vacuole%3B EXPRESSED IN: 24 plant structures%3B EXPRESSED DURING: 13 growth stages%3B CONTAINS InterPro DOMAIN/s: Rossmann-like alpha/beta/alpha sandwich fold (InterPro:IPR014729)%2C Cryptochrome/D photolyase%2C class 1 conserved si…	Blue light receptor mediating blue-light regulated cotyledon expansion and flowering time. Positive regulator of the flowering-time gene CONSTANS. This gene possesses a light-induced CNT2 N-terminal homodimerisation domain.Involved in blue-light induced stomatal opening. Involved in triggering chromatin decondensation. An 80-residue motif (NC80) is sufficient to confer CRY2's physiological functi…	cryptochrome 2 (CRY2)%3B FUNCTIONS IN: protein homodimerization activity%2C blue light photoreceptor activity%3B INVOLVED IN: in 9 processes%3B LOCATED IN: nucleus%2C vacuole%3B EXPRESSED IN: 24 plant structures%3B EXPRESSED DURING: 13 growth stages%3B CONTAINS InterPro DOMAIN/s: Rossmann-like alpha/beta/alpha sandwich fold (InterPro:IPR014729)%2C Cryptochrome/D photolyase%2C class 1 conserved si…	scaffold_1	1432851	1435817	2967	-	scaffold_1	1435406	1437174	1769	*	0.820064935	-0.053968378	199.1357197	0.851428571	4.821622386	0.012212842	20.6863	0.28	0.851428571	0	0.116043956	0.64	0.36	-2.452671681	-2.170149203	-3.815906232	-1.999624587	111	MODIFIER	NO	NO	NO	NO	A	B	-2.5325186144801	-0.508970531785766	0	-1.71007970100546	-1.811950369428094
AL1G14010	AT1G04400	OG0004982	CRY2	protein_coding	cryptochrome 2	cryptochrome 2	cryptochrome 2 (CRY2)%3B FUNCTIONS IN: protein homodimerization activity%2C blue light photoreceptor activity%3B INVOLVED IN: in 9 processes%3B LOCATED IN: nucleus%2C vacuole%3B EXPRESSED IN: 24 plant structures%3B EXPRESSED DURING: 13 growth stages%3B CONTAINS InterPro DOMAIN/s: Rossmann-like alpha/beta/alpha sandwich fold (InterPro:IPR014729)%2C Cryptochrome/D photolyase%2C class 1 conserved si…	Blue light receptor mediating blue-light regulated cotyledon expansion and flowering time. Positive regulator of the flowering-time gene CONSTANS. This gene possesses a light-induced CNT2 N-terminal homodimerisation domain.Involved in blue-light induced stomatal opening. Involved in triggering chromatin decondensation. An 80-residue motif (NC80) is sufficient to confer CRY2's physiological functi…	cryptochrome 2 (CRY2)%3B FUNCTIONS IN: protein homodimerization activity%2C blue light photoreceptor activity%3B INVOLVED IN: in 9 processes%3B LOCATED IN: nucleus%2C vacuole%3B EXPRESSED IN: 24 plant structures%3B EXPRESSED DURING: 13 growth stages%3B CONTAINS InterPro DOMAIN/s: Rossmann-like alpha/beta/alpha sandwich fold (InterPro:IPR014729)%2C Cryptochrome/D photolyase%2C class 1 conserved si…	scaffold_1	1432851	1435817	2967	-	scaffold_1	1433655	1434424	770	*	1	-0.024118791	262.8085299	1	6.279705116	0.012212842	0	-0.28	1	0	0	0.36	0.64	-2.452671681	-3.439414612	-2.146447256	-5.073481153	1	MODIFIER	NO	NO	NO	NO	A	B	-2.5325186144801	-2.60308808599611	0	0.0247837637826873	-1.811950369428094
AL1G14010	AT1G04400	OG0004982	CRY2	protein_coding	cryptochrome 2	cryptochrome 2	cryptochrome 2 (CRY2)%3B FUNCTIONS IN: protein homodimerization activity%2C blue light photoreceptor activity%3B INVOLVED IN: in 9 processes%3B LOCATED IN: nucleus%2C vacuole%3B EXPRESSED IN: 24 plant structures%3B EXPRESSED DURING: 13 growth stages%3B CONTAINS InterPro DOMAIN/s: Rossmann-like alpha/beta/alpha sandwich fold (InterPro:IPR014729)%2C Cryptochrome/D photolyase%2C class 1 conserved si…	Blue light receptor mediating blue-light regulated cotyledon expansion and flowering time. Positive regulator of the flowering-time gene CONSTANS. This gene possesses a light-induced CNT2 N-terminal homodimerisation domain.Involved in blue-light induced stomatal opening. Involved in triggering chromatin decondensation. An 80-residue motif (NC80) is sufficient to confer CRY2's physiological functi…	cryptochrome 2 (CRY2)%3B FUNCTIONS IN: protein homodimerization activity%2C blue light photoreceptor activity%3B INVOLVED IN: in 9 processes%3B LOCATED IN: nucleus%2C vacuole%3B EXPRESSED IN: 24 plant structures%3B EXPRESSED DURING: 13 growth stages%3B CONTAINS InterPro DOMAIN/s: Rossmann-like alpha/beta/alpha sandwich fold (InterPro:IPR014729)%2C Cryptochrome/D photolyase%2C class 1 conserved si…	scaffold_1	1432851	1435817	2967	-	scaffold_1	1435406	1437174	1769	*	0.820064935	-0.053968378	199.1357197	0.851428571	4.821622386	0.012212842	20.6863	0.28	0.851428571	0	0.116043956	0.64	0.36	-2.452671681	-2.170149203	-3.815906232	-1.999624587	119	MODIFIER	NO	NO	NO	NO	A	B	-2.5325186144801	-0.508970531785766	0	-1.71007970100546	-1.811950369428094
AL1G14010	AT1G04400	OG0004982	CRY2	protein_coding	cryptochrome 2	cryptochrome 2	cryptochrome 2 (CRY2)%3B FUNCTIONS IN: protein homodimerization activity%2C blue light photoreceptor activity%3B INVOLVED IN: in 9 processes%3B LOCATED IN: nucleus%2C vacuole%3B EXPRESSED IN: 24 plant structures%3B EXPRESSED DURING: 13 growth stages%3B CONTAINS InterPro DOMAIN/s: Rossmann-like alpha/beta/alpha sandwich fold (InterPro:IPR014729)%2C Cryptochrome/D photolyase%2C class 1 conserved si…	Blue light receptor mediating blue-light regulated cotyledon expansion and flowering time. Positive regulator of the flowering-time gene CONSTANS. This gene possesses a light-induced CNT2 N-terminal homodimerisation domain.Involved in blue-light induced stomatal opening. Involved in triggering chromatin decondensation. An 80-residue motif (NC80) is sufficient to confer CRY2's physiological functi…	cryptochrome 2 (CRY2)%3B FUNCTIONS IN: protein homodimerization activity%2C blue light photoreceptor activity%3B INVOLVED IN: in 9 processes%3B LOCATED IN: nucleus%2C vacuole%3B EXPRESSED IN: 24 plant structures%3B EXPRESSED DURING: 13 growth stages%3B CONTAINS InterPro DOMAIN/s: Rossmann-like alpha/beta/alpha sandwich fold (InterPro:IPR014729)%2C Cryptochrome/D photolyase%2C class 1 conserved si…	scaffold_1	1432851	1435817	2967	-	scaffold_1	1435406	1437174	1769	*	0.820064935	-0.053968378	199.1357197	0.851428571	4.821622386	0.012212842	20.6863	0.28	0.851428571	0	0.116043956	0.64	0.36	-2.452671681	-2.170149203	-3.815906232	-1.999624587	118	MODIFIER	NO	NO	NO	NO	A	B	-2.5325186144801	-0.508970531785766	0	-1.71007970100546	-1.811950369428094
AL1G14010	AT1G04400	OG0004982	CRY2	protein_coding	cryptochrome 2	cryptochrome 2	cryptochrome 2 (CRY2)%3B FUNCTIONS IN: protein homodimerization activity%2C blue light photoreceptor activity%3B INVOLVED IN: in 9 processes%3B LOCATED IN: nucleus%2C vacuole%3B EXPRESSED IN: 24 plant structures%3B EXPRESSED DURING: 13 growth stages%3B CONTAINS InterPro DOMAIN/s: Rossmann-like alpha/beta/alpha sandwich fold (InterPro:IPR014729)%2C Cryptochrome/D photolyase%2C class 1 conserved si…	Blue light receptor mediating blue-light regulated cotyledon expansion and flowering time. Positive regulator of the flowering-time gene CONSTANS. This gene possesses a light-induced CNT2 N-terminal homodimerisation domain.Involved in blue-light induced stomatal opening. Involved in triggering chromatin decondensation. An 80-residue motif (NC80) is sufficient to confer CRY2's physiological functi…	cryptochrome 2 (CRY2)%3B FUNCTIONS IN: protein homodimerization activity%2C blue light photoreceptor activity%3B INVOLVED IN: in 9 processes%3B LOCATED IN: nucleus%2C vacuole%3B EXPRESSED IN: 24 plant structures%3B EXPRESSED DURING: 13 growth stages%3B CONTAINS InterPro DOMAIN/s: Rossmann-like alpha/beta/alpha sandwich fold (InterPro:IPR014729)%2C Cryptochrome/D photolyase%2C class 1 conserved si…	scaffold_1	1432851	1435817	2967	-	scaffold_1	1434430	1435403	974	*	0.931583818	-0.036747463	247.6248765	0.937142857	5.817250109	0.012212842	2.2769	-0.537142857	0.937142857	0	0.025494505	0.2	0.737142857	-2.452671681	-3.160560848	-1.192470698	-5.655896081	47	MODIFIER	MODERATE	NO	NO	NO	A	B	-2.5325186144801	-2.60308808599611	0	0.0247837637826873	-1.811950369428094
AL1G14010	AT1G04400	OG0004982	CRY2	protein_coding	cryptochrome 2	cryptochrome 2	cryptochrome 2 (CRY2)%3B FUNCTIONS IN: protein homodimerization activity%2C blue light photoreceptor activity%3B INVOLVED IN: in 9 processes%3B LOCATED IN: nucleus%2C vacuole%3B EXPRESSED IN: 24 plant structures%3B EXPRESSED DURING: 13 growth stages%3B CONTAINS InterPro DOMAIN/s: Rossmann-like alpha/beta/alpha sandwich fold (InterPro:IPR014729)%2C Cryptochrome/D photolyase%2C class 1 conserved si…	Blue light receptor mediating blue-light regulated cotyledon expansion and flowering time. Positive regulator of the flowering-time gene CONSTANS. This gene possesses a light-induced CNT2 N-terminal homodimerisation domain.Involved in blue-light induced stomatal opening. Involved in triggering chromatin decondensation. An 80-residue motif (NC80) is sufficient to confer CRY2's physiological functi…	cryptochrome 2 (CRY2)%3B FUNCTIONS IN: protein homodimerization activity%2C blue light photoreceptor activity%3B INVOLVED IN: in 9 processes%3B LOCATED IN: nucleus%2C vacuole%3B EXPRESSED IN: 24 plant structures%3B EXPRESSED DURING: 13 growth stages%3B CONTAINS InterPro DOMAIN/s: Rossmann-like alpha/beta/alpha sandwich fold (InterPro:IPR014729)%2C Cryptochrome/D photolyase%2C class 1 conserved si…	scaffold_1	1432851	1435817	2967	-	scaffold_1	1434430	1435403	974	*	0.931583818	-0.036747463	247.6248765	0.937142857	5.817250109	0.012212842	2.2769	-0.537142857	0.937142857	0	0.025494505	0.2	0.737142857	-2.452671681	-3.160560848	-1.192470698	-5.655896081	42	MODIFIER	MODERATE	NO	NO	NO	A	B	-2.5325186144801	-2.60308808599611	0	0.0247837637826873	-1.811950369428094
AL1G19780	AT1G09290	OG0014150	.	protein_coding	hypothetical protein	.	unknown protein%3B Has 73 Blast hits to 71 proteins in 26 species: Archae - 0%3B Bacteria - 0%3B Metazoa - 5%3B Fungi - 11%3B Plants - 54%3B Viruses - 0%3B Other Eukaryotes - 3 (source: NCBI BLink).	.	unknown protein%3B Has 73 Blast hits to 71 proteins in 26 species: Archae - 0%3B Bacteria - 0%3B Metazoa - 5%3B Fungi - 11%3B Plants - 54%3B Viruses - 0%3B Other Eukaryotes - 3 (source: NCBI BLink).	scaffold_1	3553031	3555290	2260	-	scaffold_1	3554225	3554796	572	*	0.776853002	-0.053394348	243.4495303	0.854285714	3.978991231	0.012212842	11.7933	0.048571429	0.854285714	0	0.264175824	0.52	0.471428571	-2.452671681	-0.549912677	-3.100423814	-1.792543724	112	MODIFIER	MODERATE	NO	NO	NO	B	B	-2.24500767940664	-0.752354654309003	-2.8948062866111	-0.751774168074853	-1.524439434354634
AL1G19780	AT1G09290	OG0014150	.	protein_coding	hypothetical protein	.	unknown protein%3B Has 73 Blast hits to 71 proteins in 26 species: Archae - 0%3B Bacteria - 0%3B Metazoa - 5%3B Fungi - 11%3B Plants - 54%3B Viruses - 0%3B Other Eukaryotes - 3 (source: NCBI BLink).	.	unknown protein%3B Has 73 Blast hits to 71 proteins in 26 species: Archae - 0%3B Bacteria - 0%3B Metazoa - 5%3B Fungi - 11%3B Plants - 54%3B Viruses - 0%3B Other Eukaryotes - 3 (source: NCBI BLink).	scaffold_1	3553031	3555290	2260	-	scaffold_1	3554225	3554796	572	*	0.776853002	-0.053394348	243.4495303	0.854285714	3.978991231	0.012212842	11.7933	0.048571429	0.854285714	0	0.264175824	0.52	0.471428571	-2.452671681	-0.549912677	-3.100423814	-1.792543724	111	MODIFIER	MODERATE	NO	NO	NO	B	B	-2.24500767940664	-0.752354654309003	-2.8948062866111	-0.751774168074853	-1.524439434354634
AL1G21000	AT1G10270	OG0006856	GRP23	protein_coding	glutamine-rich protein 23	glutamine-rich protein 23	glutamine-rich protein 23 (GRP23)%3B FUNCTIONS IN: binding%3B INVOLVED IN: embryo development%2C cell division%3B LOCATED IN: nucleus%3B EXPRESSED IN: 26 plant structures%3B EXPRESSED DURING: 14 growth stages%3B CONTAINS InterPro DOMAIN/s: Pentatricopeptide repeat (InterPro:IPR002885)%2C Tetratricopeptide-like helical (InterPro:IPR011990)%3B BEST Arabidopsis thaliana protein match is: Pentatricop…	.	glutamine-rich protein 23 (GRP23)%3B FUNCTIONS IN: binding%3B INVOLVED IN: embryo development%2C cell division%3B LOCATED IN: nucleus%3B EXPRESSED IN: 26 plant structures%3B EXPRESSED DURING: 14 growth stages%3B CONTAINS InterPro DOMAIN/s: Pentatricopeptide repeat (InterPro:IPR002885)%2C Tetratricopeptide-like helical (InterPro:IPR011990)%3B BEST Arabidopsis thaliana protein match is: Pentatricop…	scaffold_1	3980704	3983751	3048	+	scaffold_1	3981542	3982214	673	*	0.533504705	-0.023351279	295.1413421	0.715142857	2.673218492	0.058528709	3.994	-0.465714286	0.694285714	0.111157895	0.351648352	0.18	0.645714286	-1.485437864	0.406844203	-0.443599099	-2.530269299	48	MODIFIER	MODERATE	HIGH	0	0.0714285714285714	B	B	-1.66998580925972	0.596399024673925	-0.30471645122222	-3.64321327605508	-0.9494175642077138
AL1G21000	AT1G10270	OG0006856	GRP23	protein_coding	glutamine-rich protein 23	glutamine-rich protein 23	glutamine-rich protein 23 (GRP23)%3B FUNCTIONS IN: binding%3B INVOLVED IN: embryo development%2C cell division%3B LOCATED IN: nucleus%3B EXPRESSED IN: 26 plant structures%3B EXPRESSED DURING: 14 growth stages%3B CONTAINS InterPro DOMAIN/s: Pentatricopeptide repeat (InterPro:IPR002885)%2C Tetratricopeptide-like helical (InterPro:IPR011990)%3B BEST Arabidopsis thaliana protein match is: Pentatricop…	.	glutamine-rich protein 23 (GRP23)%3B FUNCTIONS IN: binding%3B INVOLVED IN: embryo development%2C cell division%3B LOCATED IN: nucleus%3B EXPRESSED IN: 26 plant structures%3B EXPRESSED DURING: 14 growth stages%3B CONTAINS InterPro DOMAIN/s: Pentatricopeptide repeat (InterPro:IPR002885)%2C Tetratricopeptide-like helical (InterPro:IPR011990)%3B BEST Arabidopsis thaliana protein match is: Pentatricop…	scaffold_1	3980704	3983751	3048	+	scaffold_1	3982223	3982698	476	*	0.536886307	-0.00567468	313.8091318	0.723428571	2.584325168	0.072841129	11.6199	-0.699714286	0.699714286	0.092	0.39956044	0.046	0.745714286	-1.652139147	0.930896967	0.246841434	-2.970316134	9	MODIFIER	MODERATE	NO	0	0.0714285714285714	B	B	-1.78158544853165	0.844853649749729	0.0571343346041664	-3.12275423661864	-1.061017203479644
AL1G23170	AT1G11950	OG0006727	.	protein_coding	Transcription factor jumonji (jmjC) domain-containing protein	.	Transcription factor jumonji (jmjC) domain-containing protein%3B CONTAINS InterPro DOMAIN/s: Transcription factor jumonji/aspartyl beta-hydroxylase (InterPro:IPR003347)%2C Transcription factor jumonji (InterPro:IPR013129)%3B BEST Arabidopsis thaliana protein match is: transcription factor jumonji (jmjC) domain-containing protein (TAIR:AT1G62310.1)%3B Has 30201 Blast hits to 17322 proteins in 780 …	.	Transcription factor jumonji (jmjC) domain-containing protein%3B CONTAINS InterPro DOMAIN/s: Transcription factor jumonji/aspartyl beta-hydroxylase (InterPro:IPR003347)%2C Transcription factor jumonji (InterPro:IPR013129)%3B BEST Arabidopsis thaliana protein match is: transcription factor jumonji (jmjC) domain-containing protein (TAIR:AT1G62310.1)%3B Has 30201 Blast hits to 17322 proteins in 780 …	scaffold_1	4798175	4802543	4369	-	scaffold_1	4797995	4798888	894	*	0.758152921	-0.037246359	244.7359369	0.863714286	4.614935753	0.015592651	5.1449	0.436857143	0.856857143	0.092	0.152087912	0.694	0.257142857	-1.652139147	-1.775907675	-3.616763626	-0.918921331	109	MODIFIER	NO	NO	NO	NO	A	A	-1.59621655618166	-2.48646652728706	-5.74517475741895	-0.256098892421107	-0.8756483111296538
AL1G23170	AT1G11950	OG0006727	.	protein_coding	Transcription factor jumonji (jmjC) domain-containing protein	.	Transcription factor jumonji (jmjC) domain-containing protein%3B CONTAINS InterPro DOMAIN/s: Transcription factor jumonji/aspartyl beta-hydroxylase (InterPro:IPR003347)%2C Transcription factor jumonji (InterPro:IPR013129)%3B BEST Arabidopsis thaliana protein match is: transcription factor jumonji (jmjC) domain-containing protein (TAIR:AT1G62310.1)%3B Has 30201 Blast hits to 17322 proteins in 780 …	.	Transcription factor jumonji (jmjC) domain-containing protein%3B CONTAINS InterPro DOMAIN/s: Transcription factor jumonji/aspartyl beta-hydroxylase (InterPro:IPR003347)%2C Transcription factor jumonji (InterPro:IPR013129)%3B BEST Arabidopsis thaliana protein match is: transcription factor jumonji (jmjC) domain-containing protein (TAIR:AT1G62310.1)%3B Has 30201 Blast hits to 17322 proteins in 780 …	scaffold_1	4798175	4802543	4369	-	scaffold_1	4797995	4798888	894	*	0.758152921	-0.037246359	244.7359369	0.863714286	4.614935753	0.015592651	5.1449	0.436857143	0.856857143	0.092	0.152087912	0.694	0.257142857	-1.652139147	-1.775907675	-3.616763626	-0.918921331	98	MODIFIER	NO	NO	NO	NO	A	A	-1.59621655618166	-2.48646652728706	-5.74517475741895	-0.256098892421107	-0.8756483111296538
AL1G28820	AT1G16650	OG0009489	.	protein_coding	S-adenosyl-L-methionine-dependent methyltransferases superfamily protein	.	S-adenosyl-L-methionine-dependent methyltransferases superfamily protein%3B Has 486 Blast hits to 429 proteins in 154 species: Archae - 0%3B Bacteria - 55%3B Metazoa - 267%3B Fungi - 96%3B Plants - 28%3B Viruses - 0%3B Other Eukaryotes - 40 (source: NCBI BLink).	.	S-adenosyl-L-methionine-dependent methyltransferases superfamily protein%3B Has 486 Blast hits to 429 proteins in 154 species: Archae - 0%3B Bacteria - 55%3B Metazoa - 267%3B Fungi - 96%3B Plants - 28%3B Viruses - 0%3B Other Eukaryotes - 40 (source: NCBI BLink).	scaffold_1	6979058	6982512	3455	+	scaffold_1	6978633	6979628	996	*	0.382572336	-0.289490935	284.2565483	0.685714286	2.444874748	0.058528709	14.6599	-0.179714286	0.626	0.396842105	0.224175824	0.426	0.605714286	1.000426321	-0.987424617	-0.292155321	-3.151511889	118	MODIFIER	MODERATE	NO	NO	NO	B	B	0.739809791290201	-0.808130182387244	-2.1795690608256	-1.46224206317857	1.460378036342207
AL1G32610	AT1G19880	OG0011849	.	protein_coding	Regulator of chromosome condensation (RCC1) family protein	.	Regulator of chromosome condensation (RCC1) family protein%3B CONTAINS InterPro DOMAIN/s: Regulator of chromosome condensation/beta-lactamase-inhibitor protein II (InterPro:IPR009091)%2C Regulator of chromosome condensation%2C RCC1 (InterPro:IPR000408)%3B BEST Arabidopsis thaliana protein match is: Regulator of chromosome condensation (RCC1) family protein (TAIR:AT5G63860.1)%3B Has 17859 Blast hi…	.	Regulator of chromosome condensation (RCC1) family protein%3B CONTAINS InterPro DOMAIN/s: Regulator of chromosome condensation/beta-lactamase-inhibitor protein II (InterPro:IPR009091)%2C Regulator of chromosome condensation%2C RCC1 (InterPro:IPR000408)%3B BEST Arabidopsis thaliana protein match is: Regulator of chromosome condensation (RCC1) family protein (TAIR:AT5G63860.1)%3B Has 17859 Blast hi…	scaffold_1	8487417	8491128	3712	-	scaffold_1	8488219	8488654	436	*	0.553906122	-0.100337775	332.0640754	0.76	3.078899907	0.073852104	10.8051	0.539428571	0.732571429	0.181894737	0.263736264	0.768	0.228571429	-0.869925435	-0.554720501	-3.548792796	0.12942554	2	MODIFIER	MODERATE	NO	NO	NO	C	A	-0.937967836408212	-0.58502807007428	-4.58555937360105	0.165225091884585	-0.2173995913562059
AL1G34410	AT1G21320	OG0011639	.	protein_coding	nucleic acid/nucleotide binding protein	.	nucleotide binding%3Bnucleic acid binding%3B FUNCTIONS IN: nucleotide binding%2C nucleic acid binding%3B INVOLVED IN: biological_process unknown%3B LOCATED IN: cellular_component unknown%3B EXPRESSED IN: flower%2C cultured cell%3B EXPRESSED DURING: petal differentiation and expansion stage%3B CONTAINS InterPro DOMAIN/s: R recognition motif%2C RNP-1 (InterPro:IPR000504)%2C Nucleotide-binding%2C al…	.	nucleotide binding%3Bnucleic acid binding%3B FUNCTIONS IN: nucleotide binding%2C nucleic acid binding%3B INVOLVED IN: biological_process unknown%3B LOCATED IN: cellular_component unknown%3B EXPRESSED IN: flower%2C cultured cell%3B EXPRESSED DURING: petal differentiation and expansion stage%3B CONTAINS InterPro DOMAIN/s: R recognition motif%2C RNP-1 (InterPro:IPR000504)%2C Nucleotide-binding%2C al…	scaffold_1	9191654	9193993	2340	-	scaffold_1	9192563	9194457	1895	*	0.83	-0.035381889	214.7758235	0.857714286	5.079871412	0.012212842	7.2229	-0.250857143	0.857714286	0.017684211	0.092307692	0.332	0.582857143	-2.298793574	-2.429771673	-1.879333819	-3.941007681	106	MODIFIER	MODERATE	HIGH	0	1	A	B	-2.20150273528368	-2.21772989200099	0.0952238910069438	0.338711438363397	-1.4809344902316737
AL1G34410	AT1G21320	OG0011639	.	protein_coding	nucleic acid/nucleotide binding protein	.	nucleotide binding%3Bnucleic acid binding%3B FUNCTIONS IN: nucleotide binding%2C nucleic acid binding%3B INVOLVED IN: biological_process unknown%3B LOCATED IN: cellular_component unknown%3B EXPRESSED IN: flower%2C cultured cell%3B EXPRESSED DURING: petal differentiation and expansion stage%3B CONTAINS InterPro DOMAIN/s: R recognition motif%2C RNP-1 (InterPro:IPR000504)%2C Nucleotide-binding%2C al…	.	nucleotide binding%3Bnucleic acid binding%3B FUNCTIONS IN: nucleotide binding%2C nucleic acid binding%3B INVOLVED IN: biological_process unknown%3B LOCATED IN: cellular_component unknown%3B EXPRESSED IN: flower%2C cultured cell%3B EXPRESSED DURING: petal differentiation and expansion stage%3B CONTAINS InterPro DOMAIN/s: R recognition motif%2C RNP-1 (InterPro:IPR000504)%2C Nucleotide-binding%2C al…	scaffold_1	9191654	9193993	2340	-	scaffold_1	9192035	9192561	527	*	0.902790148	-0.036675029	218.4106471	0.918	5.603723257	0.012212842	3.3761	-0.042	0.918	0.004	0.057142857	0.438	0.48	-2.417865919	-2.814397555	-2.588853884	-3.384477861	54	MODIFIER	MODERATE	HIGH	0	1	A	B	-2.20150273528368	-2.1061788358445	0.0952238910069438	0.31392767458071	-1.4809344902316737
AL1G34410	AT1G21320	OG0011639	.	protein_coding	nucleic acid/nucleotide binding protein	.	nucleotide binding%3Bnucleic acid binding%3B FUNCTIONS IN: nucleotide binding%2C nucleic acid binding%3B INVOLVED IN: biological_process unknown%3B LOCATED IN: cellular_component unknown%3B EXPRESSED IN: flower%2C cultured cell%3B EXPRESSED DURING: petal differentiation and expansion stage%3B CONTAINS InterPro DOMAIN/s: R recognition motif%2C RNP-1 (InterPro:IPR000504)%2C Nucleotide-binding%2C al…	.	nucleotide binding%3Bnucleic acid binding%3B FUNCTIONS IN: nucleotide binding%2C nucleic acid binding%3B INVOLVED IN: biological_process unknown%3B LOCATED IN: cellular_component unknown%3B EXPRESSED IN: flower%2C cultured cell%3B EXPRESSED DURING: petal differentiation and expansion stage%3B CONTAINS InterPro DOMAIN/s: R recognition motif%2C RNP-1 (InterPro:IPR000504)%2C Nucleotide-binding%2C al…	scaffold_1	9191654	9193993	2340	-	scaffold_1	9192035	9192561	527	*	0.902790148	-0.036675029	218.4106471	0.918	5.603723257	0.012212842	3.3761	-0.042	0.918	0.004	0.057142857	0.438	0.48	-2.417865919	-2.814397555	-2.588853884	-3.384477861	55	MODIFIER	MODERATE	HIGH	0	1	A	B	-2.20150273528368	-2.1061788358445	0.0952238910069438	0.31392767458071	-1.4809344902316737
AL1G34410	AT1G21320	OG0011639	.	protein_coding	nucleic acid/nucleotide binding protein	.	nucleotide binding%3Bnucleic acid binding%3B FUNCTIONS IN: nucleotide binding%2C nucleic acid binding%3B INVOLVED IN: biological_process unknown%3B LOCATED IN: cellular_component unknown%3B EXPRESSED IN: flower%2C cultured cell%3B EXPRESSED DURING: petal differentiation and expansion stage%3B CONTAINS InterPro DOMAIN/s: R recognition motif%2C RNP-1 (InterPro:IPR000504)%2C Nucleotide-binding%2C al…	.	nucleotide binding%3Bnucleic acid binding%3B FUNCTIONS IN: nucleotide binding%2C nucleic acid binding%3B INVOLVED IN: biological_process unknown%3B LOCATED IN: cellular_component unknown%3B EXPRESSED IN: flower%2C cultured cell%3B EXPRESSED DURING: petal differentiation and expansion stage%3B CONTAINS InterPro DOMAIN/s: R recognition motif%2C RNP-1 (InterPro:IPR000504)%2C Nucleotide-binding%2C al…	scaffold_1	9191654	9193993	2340	-	scaffold_1	9192563	9194457	1895	*	0.83	-0.035381889	214.7758235	0.857714286	5.079871412	0.012212842	7.2229	-0.250857143	0.857714286	0.017684211	0.092307692	0.332	0.582857143	-2.298793574	-2.429771673	-1.879333819	-3.941007681	104	MODIFIER	MODERATE	HIGH	0	1	A	B	-2.20150273528368	-2.21772989200099	0.0952238910069438	0.338711438363397	-1.4809344902316737
AL1G34410	AT1G21320	OG0011639	.	protein_coding	nucleic acid/nucleotide binding protein	.	nucleotide binding%3Bnucleic acid binding%3B FUNCTIONS IN: nucleotide binding%2C nucleic acid binding%3B INVOLVED IN: biological_process unknown%3B LOCATED IN: cellular_component unknown%3B EXPRESSED IN: flower%2C cultured cell%3B EXPRESSED DURING: petal differentiation and expansion stage%3B CONTAINS InterPro DOMAIN/s: R recognition motif%2C RNP-1 (InterPro:IPR000504)%2C Nucleotide-binding%2C al…	.	nucleotide binding%3Bnucleic acid binding%3B FUNCTIONS IN: nucleotide binding%2C nucleic acid binding%3B INVOLVED IN: biological_process unknown%3B LOCATED IN: cellular_component unknown%3B EXPRESSED IN: flower%2C cultured cell%3B EXPRESSED DURING: petal differentiation and expansion stage%3B CONTAINS InterPro DOMAIN/s: R recognition motif%2C RNP-1 (InterPro:IPR000504)%2C Nucleotide-binding%2C al…	scaffold_1	9191654	9193993	2340	-	scaffold_1	9192035	9192561	527	*	0.902790148	-0.036675029	218.4106471	0.918	5.603723257	0.012212842	3.3761	-0.042	0.918	0.004	0.057142857	0.438	0.48	-2.417865919	-2.814397555	-2.588853884	-3.384477861	56	MODIFIER	MODERATE	HIGH	0	1	A	B	-2.20150273528368	-2.1061788358445	0.0952238910069438	0.31392767458071	-1.4809344902316737
AL1G34410	AT1G21320	OG0011639	.	protein_coding	nucleic acid/nucleotide binding protein	.	nucleotide binding%3Bnucleic acid binding%3B FUNCTIONS IN: nucleotide binding%2C nucleic acid binding%3B INVOLVED IN: biological_process unknown%3B LOCATED IN: cellular_component unknown%3B EXPRESSED IN: flower%2C cultured cell%3B EXPRESSED DURING: petal differentiation and expansion stage%3B CONTAINS InterPro DOMAIN/s: R recognition motif%2C RNP-1 (InterPro:IPR000504)%2C Nucleotide-binding%2C al…	.	nucleotide binding%3Bnucleic acid binding%3B FUNCTIONS IN: nucleotide binding%2C nucleic acid binding%3B INVOLVED IN: biological_process unknown%3B LOCATED IN: cellular_component unknown%3B EXPRESSED IN: flower%2C cultured cell%3B EXPRESSED DURING: petal differentiation and expansion stage%3B CONTAINS InterPro DOMAIN/s: R recognition motif%2C RNP-1 (InterPro:IPR000504)%2C Nucleotide-binding%2C al…	scaffold_1	9191654	9193993	2340	-	scaffold_1	9194461	9194826	366	*	0.798290256	-0.001125611	197.3404341	0.840857143	5.005750079	0.012212842	2.1022	0.203142857	0.826	0.059157895	0.067252747	0.526	0.322857143	-1.937912775	-2.703817614	-2.801113669	-2.064337357	111	MODIFIER	NO	NO	0	1	A	B	-0.752598944058218	-2.21772989200099	0.0232769511350307	0.338711438363397	-0.032030699006211916
AL1G34410	AT1G21320	OG0011639	.	protein_coding	nucleic acid/nucleotide binding protein	.	nucleotide binding%3Bnucleic acid binding%3B FUNCTIONS IN: nucleotide binding%2C nucleic acid binding%3B INVOLVED IN: biological_process unknown%3B LOCATED IN: cellular_component unknown%3B EXPRESSED IN: flower%2C cultured cell%3B EXPRESSED DURING: petal differentiation and expansion stage%3B CONTAINS InterPro DOMAIN/s: R recognition motif%2C RNP-1 (InterPro:IPR000504)%2C Nucleotide-binding%2C al…	.	nucleotide binding%3Bnucleic acid binding%3B FUNCTIONS IN: nucleotide binding%2C nucleic acid binding%3B INVOLVED IN: biological_process unknown%3B LOCATED IN: cellular_component unknown%3B EXPRESSED IN: flower%2C cultured cell%3B EXPRESSED DURING: petal differentiation and expansion stage%3B CONTAINS InterPro DOMAIN/s: R recognition motif%2C RNP-1 (InterPro:IPR000504)%2C Nucleotide-binding%2C al…	scaffold_1	9191654	9193993	2340	-	scaffold_1	9192563	9194457	1895	*	0.83	-0.035381889	214.7758235	0.857714286	5.079871412	0.012212842	7.2229	-0.250857143	0.857714286	0.017684211	0.092307692	0.332	0.582857143	-2.298793574	-2.429771673	-1.879333819	-3.941007681	103	MODIFIER	MODERATE	HIGH	0	1	A	B	-2.20150273528368	-2.21772989200099	0.0952238910069438	0.338711438363397	-1.4809344902316737
AL1G37570	AT1G70310	OG0001011	SPDS2	protein_coding	spermidine synthase 2	spermidine synthase 2	spermidine synthase 2 (SPDS2)%3B FUNCTIONS IN: spermidine synthase activity%3B INVOLVED IN: spermidine biosynthetic process%3B LOCATED IN: plasma membrane%3B EXPRESSED IN: 25 plant structures%3B EXPRESSED DURING: 13 growth stages%3B CONTAINS InterPro DOMAIN/s: Spermine synthase (InterPro:IPR001045)%3B BEST Arabidopsis thaliana protein match is: spermidine synthase 1 (TAIR:AT1G23820.1)%3B Has 5357…	Spermidine synthase.	spermidine synthase 2 (SPDS2)%3B FUNCTIONS IN: spermidine synthase activity%3B INVOLVED IN: spermidine biosynthetic process%3B LOCATED IN: plasma membrane%3B EXPRESSED IN: 25 plant structures%3B EXPRESSED DURING: 13 growth stages%3B CONTAINS InterPro DOMAIN/s: Spermine synthase (InterPro:IPR001045)%3B BEST Arabidopsis thaliana protein match is: spermidine synthase 1 (TAIR:AT1G23820.1)%3B Has 5357…	scaffold_1	10519505	10522189	2685	+	scaffold_1	10521003	10521482	480	*	0.843799679	-0.050524195	195.2099131	0.868571429	5.121867199	0.012212842	7.9143	0.308571429	0.868571429	0	0.105494505	0.64	0.331428571	-2.452671681	-2.285536968	-3.815906232	-1.850785216	82	MODIFIER	NO	NO	NO	NO	B	B	-2.49657974759592	-1.47743651932614	-0.361850785826387	0.247837637826877	-1.7760115025439138
AL1G37570	AT1G70310	OG0001011	SPDS2	protein_coding	spermidine synthase 2	spermidine synthase 2	spermidine synthase 2 (SPDS2)%3B FUNCTIONS IN: spermidine synthase activity%3B INVOLVED IN: spermidine biosynthetic process%3B LOCATED IN: plasma membrane%3B EXPRESSED IN: 25 plant structures%3B EXPRESSED DURING: 13 growth stages%3B CONTAINS InterPro DOMAIN/s: Spermine synthase (InterPro:IPR001045)%3B BEST Arabidopsis thaliana protein match is: spermidine synthase 1 (TAIR:AT1G23820.1)%3B Has 5357…	Spermidine synthase.	spermidine synthase 2 (SPDS2)%3B FUNCTIONS IN: spermidine synthase activity%3B INVOLVED IN: spermidine biosynthetic process%3B LOCATED IN: plasma membrane%3B EXPRESSED IN: 25 plant structures%3B EXPRESSED DURING: 13 growth stages%3B CONTAINS InterPro DOMAIN/s: Spermine synthase (InterPro:IPR001045)%3B BEST Arabidopsis thaliana protein match is: spermidine synthase 1 (TAIR:AT1G23820.1)%3B Has 5357…	scaffold_1	10519505	10522189	2685	+	scaffold_1	10521003	10521482	480	*	0.843799679	-0.050524195	195.2099131	0.868571429	5.121867199	0.012212842	7.9143	0.308571429	0.868571429	0	0.105494505	0.64	0.331428571	-2.452671681	-2.285536968	-3.815906232	-1.850785216	85	MODIFIER	NO	NO	NO	NO	B	B	-2.49657974759592	-1.47743651932614	-0.361850785826387	0.247837637826877	-1.7760115025439138
AL1G37570	AT1G70310	OG0001011	SPDS2	protein_coding	spermidine synthase 2	spermidine synthase 2	spermidine synthase 2 (SPDS2)%3B FUNCTIONS IN: spermidine synthase activity%3B INVOLVED IN: spermidine biosynthetic process%3B LOCATED IN: plasma membrane%3B EXPRESSED IN: 25 plant structures%3B EXPRESSED DURING: 13 growth stages%3B CONTAINS InterPro DOMAIN/s: Spermine synthase (InterPro:IPR001045)%3B BEST Arabidopsis thaliana protein match is: spermidine synthase 1 (TAIR:AT1G23820.1)%3B Has 5357…	Spermidine synthase.	spermidine synthase 2 (SPDS2)%3B FUNCTIONS IN: spermidine synthase activity%3B INVOLVED IN: spermidine biosynthetic process%3B LOCATED IN: plasma membrane%3B EXPRESSED IN: 25 plant structures%3B EXPRESSED DURING: 13 growth stages%3B CONTAINS InterPro DOMAIN/s: Spermine synthase (InterPro:IPR001045)%3B BEST Arabidopsis thaliana protein match is: spermidine synthase 1 (TAIR:AT1G23820.1)%3B Has 5357…	scaffold_1	10519505	10522189	2685	+	scaffold_1	10521003	10521482	480	*	0.843799679	-0.050524195	195.2099131	0.868571429	5.121867199	0.012212842	7.9143	0.308571429	0.868571429	0	0.105494505	0.64	0.331428571	-2.452671681	-2.285536968	-3.815906232	-1.850785216	86	MODIFIER	NO	NO	NO	NO	B	B	-2.49657974759592	-1.47743651932614	-0.361850785826387	0.247837637826877	-1.7760115025439138
AL1G37570	AT1G70310	OG0001011	SPDS2	protein_coding	spermidine synthase 2	spermidine synthase 2	spermidine synthase 2 (SPDS2)%3B FUNCTIONS IN: spermidine synthase activity%3B INVOLVED IN: spermidine biosynthetic process%3B LOCATED IN: plasma membrane%3B EXPRESSED IN: 25 plant structures%3B EXPRESSED DURING: 13 growth stages%3B CONTAINS InterPro DOMAIN/s: Spermine synthase (InterPro:IPR001045)%3B BEST Arabidopsis thaliana protein match is: spermidine synthase 1 (TAIR:AT1G23820.1)%3B Has 5357…	Spermidine synthase.	spermidine synthase 2 (SPDS2)%3B FUNCTIONS IN: spermidine synthase activity%3B INVOLVED IN: spermidine biosynthetic process%3B LOCATED IN: plasma membrane%3B EXPRESSED IN: 25 plant structures%3B EXPRESSED DURING: 13 growth stages%3B CONTAINS InterPro DOMAIN/s: Spermine synthase (InterPro:IPR001045)%3B BEST Arabidopsis thaliana protein match is: spermidine synthase 1 (TAIR:AT1G23820.1)%3B Has 5357…	scaffold_1	10519505	10522189	2685	+	scaffold_1	10521003	10521482	480	*	0.843799679	-0.050524195	195.2099131	0.868571429	5.121867199	0.012212842	7.9143	0.308571429	0.868571429	0	0.105494505	0.64	0.331428571	-2.452671681	-2.285536968	-3.815906232	-1.850785216	86	MODIFIER	NO	NO	NO	NO	B	B	-2.49657974759592	-1.47743651932614	-0.361850785826387	0.247837637826877	-1.7760115025439138
AL1G37570	AT1G70310	OG0001011	SPDS2	protein_coding	spermidine synthase 2	spermidine synthase 2	spermidine synthase 2 (SPDS2)%3B FUNCTIONS IN: spermidine synthase activity%3B INVOLVED IN: spermidine biosynthetic process%3B LOCATED IN: plasma membrane%3B EXPRESSED IN: 25 plant structures%3B EXPRESSED DURING: 13 growth stages%3B CONTAINS InterPro DOMAIN/s: Spermine synthase (InterPro:IPR001045)%3B BEST Arabidopsis thaliana protein match is: spermidine synthase 1 (TAIR:AT1G23820.1)%3B Has 5357…	Spermidine synthase.	spermidine synthase 2 (SPDS2)%3B FUNCTIONS IN: spermidine synthase activity%3B INVOLVED IN: spermidine biosynthetic process%3B LOCATED IN: plasma membrane%3B EXPRESSED IN: 25 plant structures%3B EXPRESSED DURING: 13 growth stages%3B CONTAINS InterPro DOMAIN/s: Spermine synthase (InterPro:IPR001045)%3B BEST Arabidopsis thaliana protein match is: spermidine synthase 1 (TAIR:AT1G23820.1)%3B Has 5357…	scaffold_1	10519505	10522189	2685	+	scaffold_1	10521003	10521482	480	*	0.843799679	-0.050524195	195.2099131	0.868571429	5.121867199	0.012212842	7.9143	0.308571429	0.868571429	0	0.105494505	0.64	0.331428571	-2.452671681	-2.285536968	-3.815906232	-1.850785216	85	MODIFIER	NO	NO	NO	NO	B	B	-2.49657974759592	-1.47743651932614	-0.361850785826387	0.247837637826877	-1.7760115025439138
AL1G37570	AT1G70310	OG0001011	SPDS2	protein_coding	spermidine synthase 2	spermidine synthase 2	spermidine synthase 2 (SPDS2)%3B FUNCTIONS IN: spermidine synthase activity%3B INVOLVED IN: spermidine biosynthetic process%3B LOCATED IN: plasma membrane%3B EXPRESSED IN: 25 plant structures%3B EXPRESSED DURING: 13 growth stages%3B CONTAINS InterPro DOMAIN/s: Spermine synthase (InterPro:IPR001045)%3B BEST Arabidopsis thaliana protein match is: spermidine synthase 1 (TAIR:AT1G23820.1)%3B Has 5357…	Spermidine synthase.	spermidine synthase 2 (SPDS2)%3B FUNCTIONS IN: spermidine synthase activity%3B INVOLVED IN: spermidine biosynthetic process%3B LOCATED IN: plasma membrane%3B EXPRESSED IN: 25 plant structures%3B EXPRESSED DURING: 13 growth stages%3B CONTAINS InterPro DOMAIN/s: Spermine synthase (InterPro:IPR001045)%3B BEST Arabidopsis thaliana protein match is: spermidine synthase 1 (TAIR:AT1G23820.1)%3B Has 5357…	scaffold_1	10519505	10522189	2685	+	scaffold_1	10521003	10521482	480	*	0.843799679	-0.050524195	195.2099131	0.868571429	5.121867199	0.012212842	7.9143	0.308571429	0.868571429	0	0.105494505	0.64	0.331428571	-2.452671681	-2.285536968	-3.815906232	-1.850785216	82	MODIFIER	NO	NO	NO	NO	B	B	-2.49657974759592	-1.47743651932614	-0.361850785826387	0.247837637826877	-1.7760115025439138
AL1G37570	AT1G70310	OG0001011	SPDS2	protein_coding	spermidine synthase 2	spermidine synthase 2	spermidine synthase 2 (SPDS2)%3B FUNCTIONS IN: spermidine synthase activity%3B INVOLVED IN: spermidine biosynthetic process%3B LOCATED IN: plasma membrane%3B EXPRESSED IN: 25 plant structures%3B EXPRESSED DURING: 13 growth stages%3B CONTAINS InterPro DOMAIN/s: Spermine synthase (InterPro:IPR001045)%3B BEST Arabidopsis thaliana protein match is: spermidine synthase 1 (TAIR:AT1G23820.1)%3B Has 5357…	Spermidine synthase.	spermidine synthase 2 (SPDS2)%3B FUNCTIONS IN: spermidine synthase activity%3B INVOLVED IN: spermidine biosynthetic process%3B LOCATED IN: plasma membrane%3B EXPRESSED IN: 25 plant structures%3B EXPRESSED DURING: 13 growth stages%3B CONTAINS InterPro DOMAIN/s: Spermine synthase (InterPro:IPR001045)%3B BEST Arabidopsis thaliana protein match is: spermidine synthase 1 (TAIR:AT1G23820.1)%3B Has 5357…	scaffold_1	10519505	10522189	2685	+	scaffold_1	10521003	10521482	480	*	0.843799679	-0.050524195	195.2099131	0.868571429	5.121867199	0.012212842	7.9143	0.308571429	0.868571429	0	0.105494505	0.64	0.331428571	-2.452671681	-2.285536968	-3.815906232	-1.850785216	96	MODIFIER	NO	NO	NO	NO	B	B	-2.49657974759592	-1.47743651932614	-0.361850785826387	0.247837637826877	-1.7760115025439138
AL1G37570	AT1G70310	OG0001011	SPDS2	protein_coding	spermidine synthase 2	spermidine synthase 2	spermidine synthase 2 (SPDS2)%3B FUNCTIONS IN: spermidine synthase activity%3B INVOLVED IN: spermidine biosynthetic process%3B LOCATED IN: plasma membrane%3B EXPRESSED IN: 25 plant structures%3B EXPRESSED DURING: 13 growth stages%3B CONTAINS InterPro DOMAIN/s: Spermine synthase (InterPro:IPR001045)%3B BEST Arabidopsis thaliana protein match is: spermidine synthase 1 (TAIR:AT1G23820.1)%3B Has 5357…	Spermidine synthase.	spermidine synthase 2 (SPDS2)%3B FUNCTIONS IN: spermidine synthase activity%3B INVOLVED IN: spermidine biosynthetic process%3B LOCATED IN: plasma membrane%3B EXPRESSED IN: 25 plant structures%3B EXPRESSED DURING: 13 growth stages%3B CONTAINS InterPro DOMAIN/s: Spermine synthase (InterPro:IPR001045)%3B BEST Arabidopsis thaliana protein match is: spermidine synthase 1 (TAIR:AT1G23820.1)%3B Has 5357…	scaffold_1	10519505	10522189	2685	+	scaffold_1	10521003	10521482	480	*	0.843799679	-0.050524195	195.2099131	0.868571429	5.121867199	0.012212842	7.9143	0.308571429	0.868571429	0	0.105494505	0.64	0.331428571	-2.452671681	-2.285536968	-3.815906232	-1.850785216	96	MODIFIER	NO	NO	NO	NO	B	B	-2.49657974759592	-1.47743651932614	-0.361850785826387	0.247837637826877	-1.7760115025439138
AL1G37570	AT1G23820	OG0001011	SPDS1	protein_coding	spermidine synthase	spermidine synthase 1	spermidine synthase 1 (SPDS1)%3B FUNCTIONS IN: spermidine synthase activity%3B INVOLVED IN: spermidine biosynthetic process%3B LOCATED IN: cellular_component unknown%3B EXPRESSED IN: 25 plant structures%3B EXPRESSED DURING: 15 growth stages%3B CONTAINS InterPro DOMAIN/s: Spermine synthase (InterPro:IPR001045)%3B BEST Arabidopsis thaliana protein match is: spermidine synthase 2 (TAIR:AT1G70310.1)%…	Spermidine synthase.	spermidine synthase 1 (SPDS1)%3B FUNCTIONS IN: spermidine synthase activity%3B INVOLVED IN: spermidine biosynthetic process%3B LOCATED IN: cellular_component unknown%3B EXPRESSED IN: 25 plant structures%3B EXPRESSED DURING: 15 growth stages%3B CONTAINS InterPro DOMAIN/s: Spermine synthase (InterPro:IPR001045)%3B BEST Arabidopsis thaliana protein match is: spermidine synthase 2 (TAIR:AT1G70310.1)%…	scaffold_1	10519505	10522189	2685	+	scaffold_1	10521003	10521482	480	*	0.843799679	-0.050524195	195.2099131	0.868571429	5.121867199	0.012212842	7.9143	0.308571429	0.868571429	0	0.105494505	0.64	0.331428571	-2.452671681	-2.285536968	-3.815906232	-1.850785216	82	MODIFIER	NO	NO	NO	NO	B	B	-2.49657974759592	-1.47743651932614	-0.361850785826387	0.247837637826877	-1.7760115025439138
AL1G37570	AT1G23820	OG0001011	SPDS1	protein_coding	spermidine synthase	spermidine synthase 1	spermidine synthase 1 (SPDS1)%3B FUNCTIONS IN: spermidine synthase activity%3B INVOLVED IN: spermidine biosynthetic process%3B LOCATED IN: cellular_component unknown%3B EXPRESSED IN: 25 plant structures%3B EXPRESSED DURING: 15 growth stages%3B CONTAINS InterPro DOMAIN/s: Spermine synthase (InterPro:IPR001045)%3B BEST Arabidopsis thaliana protein match is: spermidine synthase 2 (TAIR:AT1G70310.1)%…	Spermidine synthase.	spermidine synthase 1 (SPDS1)%3B FUNCTIONS IN: spermidine synthase activity%3B INVOLVED IN: spermidine biosynthetic process%3B LOCATED IN: cellular_component unknown%3B EXPRESSED IN: 25 plant structures%3B EXPRESSED DURING: 15 growth stages%3B CONTAINS InterPro DOMAIN/s: Spermine synthase (InterPro:IPR001045)%3B BEST Arabidopsis thaliana protein match is: spermidine synthase 2 (TAIR:AT1G70310.1)%…	scaffold_1	10519505	10522189	2685	+	scaffold_1	10521003	10521482	480	*	0.843799679	-0.050524195	195.2099131	0.868571429	5.121867199	0.012212842	7.9143	0.308571429	0.868571429	0	0.105494505	0.64	0.331428571	-2.452671681	-2.285536968	-3.815906232	-1.850785216	85	MODIFIER	NO	NO	NO	NO	B	B	-2.49657974759592	-1.47743651932614	-0.361850785826387	0.247837637826877	-1.7760115025439138
AL1G37570	AT1G23820	OG0001011	SPDS1	protein_coding	spermidine synthase	spermidine synthase 1	spermidine synthase 1 (SPDS1)%3B FUNCTIONS IN: spermidine synthase activity%3B INVOLVED IN: spermidine biosynthetic process%3B LOCATED IN: cellular_component unknown%3B EXPRESSED IN: 25 plant structures%3B EXPRESSED DURING: 15 growth stages%3B CONTAINS InterPro DOMAIN/s: Spermine synthase (InterPro:IPR001045)%3B BEST Arabidopsis thaliana protein match is: spermidine synthase 2 (TAIR:AT1G70310.1)%…	Spermidine synthase.	spermidine synthase 1 (SPDS1)%3B FUNCTIONS IN: spermidine synthase activity%3B INVOLVED IN: spermidine biosynthetic process%3B LOCATED IN: cellular_component unknown%3B EXPRESSED IN: 25 plant structures%3B EXPRESSED DURING: 15 growth stages%3B CONTAINS InterPro DOMAIN/s: Spermine synthase (InterPro:IPR001045)%3B BEST Arabidopsis thaliana protein match is: spermidine synthase 2 (TAIR:AT1G70310.1)%…	scaffold_1	10519505	10522189	2685	+	scaffold_1	10521003	10521482	480	*	0.843799679	-0.050524195	195.2099131	0.868571429	5.121867199	0.012212842	7.9143	0.308571429	0.868571429	0	0.105494505	0.64	0.331428571	-2.452671681	-2.285536968	-3.815906232	-1.850785216	86	MODIFIER	NO	NO	NO	NO	B	B	-2.49657974759592	-1.47743651932614	-0.361850785826387	0.247837637826877	-1.7760115025439138
AL1G37570	AT1G23820	OG0001011	SPDS1	protein_coding	spermidine synthase	spermidine synthase 1	spermidine synthase 1 (SPDS1)%3B FUNCTIONS IN: spermidine synthase activity%3B INVOLVED IN: spermidine biosynthetic process%3B LOCATED IN: cellular_component unknown%3B EXPRESSED IN: 25 plant structures%3B EXPRESSED DURING: 15 growth stages%3B CONTAINS InterPro DOMAIN/s: Spermine synthase (InterPro:IPR001045)%3B BEST Arabidopsis thaliana protein match is: spermidine synthase 2 (TAIR:AT1G70310.1)%…	Spermidine synthase.	spermidine synthase 1 (SPDS1)%3B FUNCTIONS IN: spermidine synthase activity%3B INVOLVED IN: spermidine biosynthetic process%3B LOCATED IN: cellular_component unknown%3B EXPRESSED IN: 25 plant structures%3B EXPRESSED DURING: 15 growth stages%3B CONTAINS InterPro DOMAIN/s: Spermine synthase (InterPro:IPR001045)%3B BEST Arabidopsis thaliana protein match is: spermidine synthase 2 (TAIR:AT1G70310.1)%…	scaffold_1	10519505	10522189	2685	+	scaffold_1	10521003	10521482	480	*	0.843799679	-0.050524195	195.2099131	0.868571429	5.121867199	0.012212842	7.9143	0.308571429	0.868571429	0	0.105494505	0.64	0.331428571	-2.452671681	-2.285536968	-3.815906232	-1.850785216	86	MODIFIER	NO	NO	NO	NO	B	B	-2.49657974759592	-1.47743651932614	-0.361850785826387	0.247837637826877	-1.7760115025439138
AL1G37570	AT1G23820	OG0001011	SPDS1	protein_coding	spermidine synthase	spermidine synthase 1	spermidine synthase 1 (SPDS1)%3B FUNCTIONS IN: spermidine synthase activity%3B INVOLVED IN: spermidine biosynthetic process%3B LOCATED IN: cellular_component unknown%3B EXPRESSED IN: 25 plant structures%3B EXPRESSED DURING: 15 growth stages%3B CONTAINS InterPro DOMAIN/s: Spermine synthase (InterPro:IPR001045)%3B BEST Arabidopsis thaliana protein match is: spermidine synthase 2 (TAIR:AT1G70310.1)%…	Spermidine synthase.	spermidine synthase 1 (SPDS1)%3B FUNCTIONS IN: spermidine synthase activity%3B INVOLVED IN: spermidine biosynthetic process%3B LOCATED IN: cellular_component unknown%3B EXPRESSED IN: 25 plant structures%3B EXPRESSED DURING: 15 growth stages%3B CONTAINS InterPro DOMAIN/s: Spermine synthase (InterPro:IPR001045)%3B BEST Arabidopsis thaliana protein match is: spermidine synthase 2 (TAIR:AT1G70310.1)%…	scaffold_1	10519505	10522189	2685	+	scaffold_1	10521003	10521482	480	*	0.843799679	-0.050524195	195.2099131	0.868571429	5.121867199	0.012212842	7.9143	0.308571429	0.868571429	0	0.105494505	0.64	0.331428571	-2.452671681	-2.285536968	-3.815906232	-1.850785216	85	MODIFIER	NO	NO	NO	NO	B	B	-2.49657974759592	-1.47743651932614	-0.361850785826387	0.247837637826877	-1.7760115025439138
AL1G37570	AT1G23820	OG0001011	SPDS1	protein_coding	spermidine synthase	spermidine synthase 1	spermidine synthase 1 (SPDS1)%3B FUNCTIONS IN: spermidine synthase activity%3B INVOLVED IN: spermidine biosynthetic process%3B LOCATED IN: cellular_component unknown%3B EXPRESSED IN: 25 plant structures%3B EXPRESSED DURING: 15 growth stages%3B CONTAINS InterPro DOMAIN/s: Spermine synthase (InterPro:IPR001045)%3B BEST Arabidopsis thaliana protein match is: spermidine synthase 2 (TAIR:AT1G70310.1)%…	Spermidine synthase.	spermidine synthase 1 (SPDS1)%3B FUNCTIONS IN: spermidine synthase activity%3B INVOLVED IN: spermidine biosynthetic process%3B LOCATED IN: cellular_component unknown%3B EXPRESSED IN: 25 plant structures%3B EXPRESSED DURING: 15 growth stages%3B CONTAINS InterPro DOMAIN/s: Spermine synthase (InterPro:IPR001045)%3B BEST Arabidopsis thaliana protein match is: spermidine synthase 2 (TAIR:AT1G70310.1)%…	scaffold_1	10519505	10522189	2685	+	scaffold_1	10521003	10521482	480	*	0.843799679	-0.050524195	195.2099131	0.868571429	5.121867199	0.012212842	7.9143	0.308571429	0.868571429	0	0.105494505	0.64	0.331428571	-2.452671681	-2.285536968	-3.815906232	-1.850785216	82	MODIFIER	NO	NO	NO	NO	B	B	-2.49657974759592	-1.47743651932614	-0.361850785826387	0.247837637826877	-1.7760115025439138
AL1G37570	AT1G23820	OG0001011	SPDS1	protein_coding	spermidine synthase	spermidine synthase 1	spermidine synthase 1 (SPDS1)%3B FUNCTIONS IN: spermidine synthase activity%3B INVOLVED IN: spermidine biosynthetic process%3B LOCATED IN: cellular_component unknown%3B EXPRESSED IN: 25 plant structures%3B EXPRESSED DURING: 15 growth stages%3B CONTAINS InterPro DOMAIN/s: Spermine synthase (InterPro:IPR001045)%3B BEST Arabidopsis thaliana protein match is: spermidine synthase 2 (TAIR:AT1G70310.1)%…	Spermidine synthase.	spermidine synthase 1 (SPDS1)%3B FUNCTIONS IN: spermidine synthase activity%3B INVOLVED IN: spermidine biosynthetic process%3B LOCATED IN: cellular_component unknown%3B EXPRESSED IN: 25 plant structures%3B EXPRESSED DURING: 15 growth stages%3B CONTAINS InterPro DOMAIN/s: Spermine synthase (InterPro:IPR001045)%3B BEST Arabidopsis thaliana protein match is: spermidine synthase 2 (TAIR:AT1G70310.1)%…	scaffold_1	10519505	10522189	2685	+	scaffold_1	10521003	10521482	480	*	0.843799679	-0.050524195	195.2099131	0.868571429	5.121867199	0.012212842	7.9143	0.308571429	0.868571429	0	0.105494505	0.64	0.331428571	-2.452671681	-2.285536968	-3.815906232	-1.850785216	96	MODIFIER	NO	NO	NO	NO	B	B	-2.49657974759592	-1.47743651932614	-0.361850785826387	0.247837637826877	-1.7760115025439138
AL1G37570	AT1G23820	OG0001011	SPDS1	protein_coding	spermidine synthase	spermidine synthase 1	spermidine synthase 1 (SPDS1)%3B FUNCTIONS IN: spermidine synthase activity%3B INVOLVED IN: spermidine biosynthetic process%3B LOCATED IN: cellular_component unknown%3B EXPRESSED IN: 25 plant structures%3B EXPRESSED DURING: 15 growth stages%3B CONTAINS InterPro DOMAIN/s: Spermine synthase (InterPro:IPR001045)%3B BEST Arabidopsis thaliana protein match is: spermidine synthase 2 (TAIR:AT1G70310.1)%…	Spermidine synthase.	spermidine synthase 1 (SPDS1)%3B FUNCTIONS IN: spermidine synthase activity%3B INVOLVED IN: spermidine biosynthetic process%3B LOCATED IN: cellular_component unknown%3B EXPRESSED IN: 25 plant structures%3B EXPRESSED DURING: 15 growth stages%3B CONTAINS InterPro DOMAIN/s: Spermine synthase (InterPro:IPR001045)%3B BEST Arabidopsis thaliana protein match is: spermidine synthase 2 (TAIR:AT1G70310.1)%…	scaffold_1	10519505	10522189	2685	+	scaffold_1	10521003	10521482	480	*	0.843799679	-0.050524195	195.2099131	0.868571429	5.121867199	0.012212842	7.9143	0.308571429	0.868571429	0	0.105494505	0.64	0.331428571	-2.452671681	-2.285536968	-3.815906232	-1.850785216	96	MODIFIER	NO	NO	NO	NO	B	B	-2.49657974759592	-1.47743651932614	-0.361850785826387	0.247837637826877	-1.7760115025439138
AL1G39720	AT1G25580	OG0008580	SOG1	protein_coding	C (No Apical Meristem) domain transcriptional regulator superfamily protein	SUPPRESSOR OF GAMMA RADIATION 1	SUPPRESSOR OF GAMMA RADIATION 1 (SOG1)%3B FUNCTIONS IN: sequence-specific D binding transcription factor activity%3B INVOLVED IN: multicellular organismal development%2C response to gamma radiation%2C D damage checkpoint%2C regulation of meiosis%3B LOCATED IN: cellular_component unknown%3B EXPRESSED IN: 23 plant structures%3B EXPRESSED DURING: 13 growth stages%3B CONTAINS InterPro DOMAIN/s: No ap…	Encodes suppressor of gamma response 1 (SOG1)%2C a putative transcription factor governing multiple responses to D damage.	SUPPRESSOR OF GAMMA RADIATION 1 (SOG1)%3B FUNCTIONS IN: sequence-specific D binding transcription factor activity%3B INVOLVED IN: multicellular organismal development%2C response to gamma radiation%2C D damage checkpoint%2C regulation of meiosis%3B LOCATED IN: cellular_component unknown%3B EXPRESSED IN: 23 plant structures%3B EXPRESSED DURING: 13 growth stages%3B CONTAINS InterPro DOMAIN/s: No ap…	scaffold_1	11510529	11513613	3085	+	scaffold_1	11513094	11514264	1171	*	0.810644659	-0.020163187	262.6183542	0.865714286	4.533755002	0.026076418	15.9967	-0.471428571	0.865714286	0.031578947	0.145934066	0.22	0.691428571	-2.177889347	-1.843217204	-1.132847163	-4.406939624	120	MODIFIER	MODERATE	NO	NO	NO	B	B	-2.24879071802603	-1.63462209845573	0.105804323341049	-3.32102434688015	-1.5282224729740237
AL1G39720	AT1G25580	OG0008580	SOG1	protein_coding	C (No Apical Meristem) domain transcriptional regulator superfamily protein	SUPPRESSOR OF GAMMA RADIATION 1	SUPPRESSOR OF GAMMA RADIATION 1 (SOG1)%3B FUNCTIONS IN: sequence-specific D binding transcription factor activity%3B INVOLVED IN: multicellular organismal development%2C response to gamma radiation%2C D damage checkpoint%2C regulation of meiosis%3B LOCATED IN: cellular_component unknown%3B EXPRESSED IN: 23 plant structures%3B EXPRESSED DURING: 13 growth stages%3B CONTAINS InterPro DOMAIN/s: No ap…	Encodes suppressor of gamma response 1 (SOG1)%2C a putative transcription factor governing multiple responses to D damage.	SUPPRESSOR OF GAMMA RADIATION 1 (SOG1)%3B FUNCTIONS IN: sequence-specific D binding transcription factor activity%3B INVOLVED IN: multicellular organismal development%2C response to gamma radiation%2C D damage checkpoint%2C regulation of meiosis%3B LOCATED IN: cellular_component unknown%3B EXPRESSED IN: 23 plant structures%3B EXPRESSED DURING: 13 growth stages%3B CONTAINS InterPro DOMAIN/s: No ap…	scaffold_1	11510529	11513613	3085	+	scaffold_1	11513094	11514264	1171	*	0.810644659	-0.020163187	262.6183542	0.865714286	4.533755002	0.026076418	15.9967	-0.471428571	0.865714286	0.031578947	0.145934066	0.22	0.691428571	-2.177889347	-1.843217204	-1.132847163	-4.406939624	93	MODIFIER	MODERATE	NO	NO	NO	B	B	-2.24879071802603	-1.63462209845573	0.105804323341049	-3.32102434688015	-1.5282224729740237
AL1G39720	AT1G25580	OG0008580	SOG1	protein_coding	C (No Apical Meristem) domain transcriptional regulator superfamily protein	SUPPRESSOR OF GAMMA RADIATION 1	SUPPRESSOR OF GAMMA RADIATION 1 (SOG1)%3B FUNCTIONS IN: sequence-specific D binding transcription factor activity%3B INVOLVED IN: multicellular organismal development%2C response to gamma radiation%2C D damage checkpoint%2C regulation of meiosis%3B LOCATED IN: cellular_component unknown%3B EXPRESSED IN: 23 plant structures%3B EXPRESSED DURING: 13 growth stages%3B CONTAINS InterPro DOMAIN/s: No ap…	Encodes suppressor of gamma response 1 (SOG1)%2C a putative transcription factor governing multiple responses to D damage.	SUPPRESSOR OF GAMMA RADIATION 1 (SOG1)%3B FUNCTIONS IN: sequence-specific D binding transcription factor activity%3B INVOLVED IN: multicellular organismal development%2C response to gamma radiation%2C D damage checkpoint%2C regulation of meiosis%3B LOCATED IN: cellular_component unknown%3B EXPRESSED IN: 23 plant structures%3B EXPRESSED DURING: 13 growth stages%3B CONTAINS InterPro DOMAIN/s: No ap…	scaffold_1	11510529	11513613	3085	+	scaffold_1	11513094	11514264	1171	*	0.810644659	-0.020163187	262.6183542	0.865714286	4.533755002	0.026076418	15.9967	-0.471428571	0.865714286	0.031578947	0.145934066	0.22	0.691428571	-2.177889347	-1.843217204	-1.132847163	-4.406939624	92	MODIFIER	MODERATE	NO	NO	NO	B	B	-2.24879071802603	-1.63462209845573	0.105804323341049	-3.32102434688015	-1.5282224729740237
AL1G41880	AT1G28305	OG0022532	.	protein_coding	Plant self-incompatibility protein S1 family	.	Plant self-incompatibility protein S1 family%3B FUNCTIONS IN: molecular_function unknown%3B INVOLVED IN: biological_process unknown%3B LOCATED IN: endomembrane system%3B CONTAINS InterPro DOMAIN/s: Plant self-incompatibility S1 (InterPro:IPR010264)%3B BEST Arabidopsis thaliana protein match is: Plant self-incompatibility protein S1 family (TAIR:AT1G28306.1)%3B Has 197 Blast hits to 195 proteins i…	.	Plant self-incompatibility protein S1 family%3B FUNCTIONS IN: molecular_function unknown%3B INVOLVED IN: biological_process unknown%3B LOCATED IN: endomembrane system%3B CONTAINS InterPro DOMAIN/s: Plant self-incompatibility S1 (InterPro:IPR010264)%3B BEST Arabidopsis thaliana protein match is: Plant self-incompatibility protein S1 family (TAIR:AT1G28306.1)%3B Has 197 Blast hits to 195 proteins i…	scaffold_1	12491406	12492141	736	-	scaffold_1	12491232	12493015	1784	*	0.88822043	-0.036441032	218.8312282	0.901714286	5.547788714	0.012212842	4.6089	0.770285714	0.901714286	0.007578947	0.042637363	0.836	0.065714286	-2.386723921	-2.973055731	-4.941598571	-0.207080863	61	MODIFIER	MODERATE	NO	NO	NO	B	B	-1.90453420366175	-2.77041467023083	-0.482467714435183	0.206531364855731	-1.183965958609744
AL1G41880	AT1G28305	OG0022532	.	protein_coding	Plant self-incompatibility protein S1 family	.	Plant self-incompatibility protein S1 family%3B FUNCTIONS IN: molecular_function unknown%3B INVOLVED IN: biological_process unknown%3B LOCATED IN: endomembrane system%3B CONTAINS InterPro DOMAIN/s: Plant self-incompatibility S1 (InterPro:IPR010264)%3B BEST Arabidopsis thaliana protein match is: Plant self-incompatibility protein S1 family (TAIR:AT1G28306.1)%3B Has 197 Blast hits to 195 proteins i…	.	Plant self-incompatibility protein S1 family%3B FUNCTIONS IN: molecular_function unknown%3B INVOLVED IN: biological_process unknown%3B LOCATED IN: endomembrane system%3B CONTAINS InterPro DOMAIN/s: Plant self-incompatibility S1 (InterPro:IPR010264)%3B BEST Arabidopsis thaliana protein match is: Plant self-incompatibility protein S1 family (TAIR:AT1G28306.1)%3B Has 197 Blast hits to 195 proteins i…	scaffold_1	12491406	12492141	736	-	scaffold_1	12491232	12493015	1784	*	0.88822043	-0.036441032	218.8312282	0.901714286	5.547788714	0.012212842	4.6089	0.770285714	0.901714286	0.007578947	0.042637363	0.836	0.065714286	-2.386723921	-2.973055731	-4.941598571	-0.207080863	56	MODIFIER	MODERATE	NO	NO	NO	B	B	-1.90453420366175	-2.77041467023083	-0.482467714435183	0.206531364855731	-1.183965958609744
AL1G41880	AT1G28305	OG0022532	.	protein_coding	Plant self-incompatibility protein S1 family	.	Plant self-incompatibility protein S1 family%3B FUNCTIONS IN: molecular_function unknown%3B INVOLVED IN: biological_process unknown%3B LOCATED IN: endomembrane system%3B CONTAINS InterPro DOMAIN/s: Plant self-incompatibility S1 (InterPro:IPR010264)%3B BEST Arabidopsis thaliana protein match is: Plant self-incompatibility protein S1 family (TAIR:AT1G28306.1)%3B Has 197 Blast hits to 195 proteins i…	.	Plant self-incompatibility protein S1 family%3B FUNCTIONS IN: molecular_function unknown%3B INVOLVED IN: biological_process unknown%3B LOCATED IN: endomembrane system%3B CONTAINS InterPro DOMAIN/s: Plant self-incompatibility S1 (InterPro:IPR010264)%3B BEST Arabidopsis thaliana protein match is: Plant self-incompatibility protein S1 family (TAIR:AT1G28306.1)%3B Has 197 Blast hits to 195 proteins i…	scaffold_1	12491406	12492141	736	-	scaffold_1	12491232	12493015	1784	*	0.88822043	-0.036441032	218.8312282	0.901714286	5.547788714	0.012212842	4.6089	0.770285714	0.901714286	0.007578947	0.042637363	0.836	0.065714286	-2.386723921	-2.973055731	-4.941598571	-0.207080863	60	MODIFIER	MODERATE	NO	NO	NO	B	B	-1.90453420366175	-2.77041467023083	-0.482467714435183	0.206531364855731	-1.183965958609744
AL1G42150	AT1G28530	OG0011414	.	protein_coding	deneddylase	.	unknown protein%3B INVOLVED IN: biological_process unknown%3B LOCATED IN: chloroplast%3B EXPRESSED IN: 19 plant structures%3B EXPRESSED DURING: 10 growth stages%3B Has 20 Blast hits to 20 proteins in 6 species: Archae - 0%3B Bacteria - 0%3B Metazoa - 0%3B Fungi - 0%3B Plants - 20%3B Viruses - 0%3B Other Eukaryotes - 0 (source: NCBI BLink).	Encodes a protein that localizes to both chloroplasts and amyloplasts and is required for both chloroplast and mesophyll development.	unknown protein%3B INVOLVED IN: biological_process unknown%3B LOCATED IN: chloroplast%3B EXPRESSED IN: 19 plant structures%3B EXPRESSED DURING: 10 growth stages%3B Has 20 Blast hits to 20 proteins in 6 species: Archae - 0%3B Bacteria - 0%3B Metazoa - 0%3B Fungi - 0%3B Plants - 20%3B Viruses - 0%3B Other Eukaryotes - 0 (source: NCBI BLink).	scaffold_1	12639303	12642837	3535	-	scaffold_1	12640515	12640822	308	*	0.34952873	-0.016333646	299.3467607	0.576857143	1.496261311	0.178449529	8.1535	0.408571429	0.533714286	0.103578947	0.520879121	0.84	0.431428571	-1.551385624	2.257856258	-4.421681346	0.414161727	31	MODIFIER	MODERATE	NO	NO	NO	B	A	-1.66998580925972	2.38121592317764	-7.54173216774996	0.528720294030667	-0.9494175642077138
AL1G44700	AT1G30640	OG0014462	.	protein_coding	Protein kinase family protein	.	Protein kinase family protein%3B FUNCTIONS IN: protein kinase activity%2C kinase activity%3B INVOLVED IN: protein amino acid phosphorylation%3B LOCATED IN: cellular_component unknown%3B EXPRESSED IN: 24 plant structures%3B EXPRESSED DURING: 14 growth stages%3B CONTAINS InterPro DOMAIN/s: Protein kinase%2C ATP binding site (InterPro:IPR017441)%2C Serine/threonine-protein kinase domain (InterPro:IP…	.	Protein kinase family protein%3B FUNCTIONS IN: protein kinase activity%2C kinase activity%3B INVOLVED IN: protein amino acid phosphorylation%3B LOCATED IN: cellular_component unknown%3B EXPRESSED IN: 24 plant structures%3B EXPRESSED DURING: 14 growth stages%3B CONTAINS InterPro DOMAIN/s: Protein kinase%2C ATP binding site (InterPro:IPR017441)%2C Serine/threonine-protein kinase domain (InterPro:IP…	scaffold_1	13780796	13784824	4029	+	scaffold_1	13782591	13783155	565	*	0.963571429	-0.031007157	249.9658138	0.965714286	6.039968887	0.012212842	0	0.874285714	0.965714286	0	0.010549451	0.92	0.045714286	-2.452671681	-3.324026848	-5.485365209	-0.284736187	26	MODIFIER	MODERATE	NO	NO	NO	A	B	-1.68322644442758	-3.5056375403531	-0.806228943858793	0.0413062729711461	-0.9626581993755738
AL1G44700	AT1G30640	OG0014462	.	protein_coding	Protein kinase family protein	.	Protein kinase family protein%3B FUNCTIONS IN: protein kinase activity%2C kinase activity%3B INVOLVED IN: protein amino acid phosphorylation%3B LOCATED IN: cellular_component unknown%3B EXPRESSED IN: 24 plant structures%3B EXPRESSED DURING: 14 growth stages%3B CONTAINS InterPro DOMAIN/s: Protein kinase%2C ATP binding site (InterPro:IPR017441)%2C Serine/threonine-protein kinase domain (InterPro:IP…	.	Protein kinase family protein%3B FUNCTIONS IN: protein kinase activity%2C kinase activity%3B INVOLVED IN: protein amino acid phosphorylation%3B LOCATED IN: cellular_component unknown%3B EXPRESSED IN: 24 plant structures%3B EXPRESSED DURING: 14 growth stages%3B CONTAINS InterPro DOMAIN/s: Protein kinase%2C ATP binding site (InterPro:IPR017441)%2C Serine/threonine-protein kinase domain (InterPro:IP…	scaffold_1	13780796	13784824	4029	+	scaffold_1	13782591	13783155	565	*	0.963571429	-0.031007157	249.9658138	0.965714286	6.039968887	0.012212842	0	0.874285714	0.965714286	0	0.010549451	0.92	0.045714286	-2.452671681	-3.324026848	-5.485365209	-0.284736187	27	MODIFIER	MODERATE	NO	NO	NO	A	B	-1.68322644442758	-3.5056375403531	-0.806228943858793	0.0413062729711461	-0.9626581993755738
AL1G47440	AT1G33090	OG0000536	.	protein_coding	MATE efflux family protein	.	MATE efflux family protein%3B FUNCTIONS IN: antiporter activity%2C drug transmembrane transporter activity%2C transporter activity%3B INVOLVED IN: drug transmembrane transport%2C transmembrane transport%3B LOCATED IN: membrane%3B CONTAINS InterPro DOMAIN/s: Multi antimicrobial extrusion protein MatE (InterPro:IPR002528)%3B BEST Arabidopsis thaliana protein match is: MATE efflux family protein (TA…	.	MATE efflux family protein%3B FUNCTIONS IN: antiporter activity%2C drug transmembrane transporter activity%2C transporter activity%3B INVOLVED IN: drug transmembrane transport%2C transmembrane transport%3B LOCATED IN: membrane%3B CONTAINS InterPro DOMAIN/s: Multi antimicrobial extrusion protein MatE (InterPro:IPR002528)%3B BEST Arabidopsis thaliana protein match is: MATE efflux family protein (TA…	scaffold_1	15296669	15303073	6405	+	scaffold_1	15297886	15301742	3857	*	0.365449696	-0.17980911	288.9683401	0.629142857	2.166813268	0.066034409	18.6079	-0.248571429	0.569714286	0.296421053	0.257142857	0.36	0.608571429	0.126618498	-0.626837853	-0.467448513	-2.931488472	66	MODIFIER	MODERATE	NO	0	0.0714285714285714	C	B	-0.487786240701084	-0.204740378631722	-1.28869665829397	-0.999611805901728	0.2327820043509221
AL1G47440	AT1G33090	OG0000536	.	protein_coding	MATE efflux family protein	.	MATE efflux family protein%3B FUNCTIONS IN: antiporter activity%2C drug transmembrane transporter activity%2C transporter activity%3B INVOLVED IN: drug transmembrane transport%2C transmembrane transport%3B LOCATED IN: membrane%3B CONTAINS InterPro DOMAIN/s: Multi antimicrobial extrusion protein MatE (InterPro:IPR002528)%3B BEST Arabidopsis thaliana protein match is: MATE efflux family protein (TA…	.	MATE efflux family protein%3B FUNCTIONS IN: antiporter activity%2C drug transmembrane transporter activity%2C transporter activity%3B INVOLVED IN: drug transmembrane transport%2C transmembrane transport%3B LOCATED IN: membrane%3B CONTAINS InterPro DOMAIN/s: Multi antimicrobial extrusion protein MatE (InterPro:IPR002528)%3B BEST Arabidopsis thaliana protein match is: MATE efflux family protein (TA…	scaffold_1	15296669	15303073	6405	+	scaffold_1	15297886	15301742	3857	*	0.365449696	-0.17980911	288.9683401	0.629142857	2.166813268	0.066034409	18.6079	-0.248571429	0.569714286	0.296421053	0.257142857	0.36	0.608571429	0.126618498	-0.626837853	-0.467448513	-2.931488472	66	MODIFIER	MODERATE	NO	0	0.0714285714285714	C	B	-0.487786240701084	-0.204740378631722	-1.28869665829397	-0.999611805901728	0.2327820043509221
AL1G47440	AT1G33110	OG0000536	.	protein_coding	MATE efflux family protein	.	MATE efflux family protein%3B FUNCTIONS IN: antiporter activity%2C drug transmembrane transporter activity%2C transporter activity%3B INVOLVED IN: drug transmembrane transport%2C transmembrane transport%3B LOCATED IN: membrane%3B EXPRESSED IN: 22 plant structures%3B EXPRESSED DURING: 13 growth stages%3B CONTAINS InterPro DOMAIN/s: Multi antimicrobial extrusion protein MatE (InterPro:IPR002528)%3B…	.	MATE efflux family protein%3B FUNCTIONS IN: antiporter activity%2C drug transmembrane transporter activity%2C transporter activity%3B INVOLVED IN: drug transmembrane transport%2C transmembrane transport%3B LOCATED IN: membrane%3B EXPRESSED IN: 22 plant structures%3B EXPRESSED DURING: 13 growth stages%3B CONTAINS InterPro DOMAIN/s: Multi antimicrobial extrusion protein MatE (InterPro:IPR002528)%3B…	scaffold_1	15296669	15303073	6405	+	scaffold_1	15297886	15301742	3857	*	0.365449696	-0.17980911	288.9683401	0.629142857	2.166813268	0.066034409	18.6079	-0.248571429	0.569714286	0.296421053	0.257142857	0.36	0.608571429	0.126618498	-0.626837853	-0.467448513	-2.931488472	66	MODIFIER	MODERATE	NO	0	0.0714285714285714	C	B	-0.487786240701084	-0.204740378631722	-1.28869665829397	-0.999611805901728	0.2327820043509221
AL1G47440	AT1G33110	OG0000536	.	protein_coding	MATE efflux family protein	.	MATE efflux family protein%3B FUNCTIONS IN: antiporter activity%2C drug transmembrane transporter activity%2C transporter activity%3B INVOLVED IN: drug transmembrane transport%2C transmembrane transport%3B LOCATED IN: membrane%3B EXPRESSED IN: 22 plant structures%3B EXPRESSED DURING: 13 growth stages%3B CONTAINS InterPro DOMAIN/s: Multi antimicrobial extrusion protein MatE (InterPro:IPR002528)%3B…	.	MATE efflux family protein%3B FUNCTIONS IN: antiporter activity%2C drug transmembrane transporter activity%2C transporter activity%3B INVOLVED IN: drug transmembrane transport%2C transmembrane transport%3B LOCATED IN: membrane%3B EXPRESSED IN: 22 plant structures%3B EXPRESSED DURING: 13 growth stages%3B CONTAINS InterPro DOMAIN/s: Multi antimicrobial extrusion protein MatE (InterPro:IPR002528)%3B…	scaffold_1	15296669	15303073	6405	+	scaffold_1	15297886	15301742	3857	*	0.365449696	-0.17980911	288.9683401	0.629142857	2.166813268	0.066034409	18.6079	-0.248571429	0.569714286	0.296421053	0.257142857	0.36	0.608571429	0.126618498	-0.626837853	-0.467448513	-2.931488472	66	MODIFIER	MODERATE	NO	0	0.0714285714285714	C	B	-0.487786240701084	-0.204740378631722	-1.28869665829397	-0.999611805901728	0.2327820043509221
AL1G47440	AT1G33100	OG0000536	.	protein_coding	MATE efflux family protein	.	MATE efflux family protein%3B FUNCTIONS IN: antiporter activity%2C drug transmembrane transporter activity%2C transporter activity%3B INVOLVED IN: drug transmembrane transport%2C transmembrane transport%3B LOCATED IN: membrane%3B CONTAINS InterPro DOMAIN/s: Multi antimicrobial extrusion protein MatE (InterPro:IPR002528)%3B BEST Arabidopsis thaliana protein match is: MATE efflux family protein (TA…	.	MATE efflux family protein%3B FUNCTIONS IN: antiporter activity%2C drug transmembrane transporter activity%2C transporter activity%3B INVOLVED IN: drug transmembrane transport%2C transmembrane transport%3B LOCATED IN: membrane%3B CONTAINS InterPro DOMAIN/s: Multi antimicrobial extrusion protein MatE (InterPro:IPR002528)%3B BEST Arabidopsis thaliana protein match is: MATE efflux family protein (TA…	scaffold_1	15296669	15303073	6405	+	scaffold_1	15297886	15301742	3857	*	0.365449696	-0.17980911	288.9683401	0.629142857	2.166813268	0.066034409	18.6079	-0.248571429	0.569714286	0.296421053	0.257142857	0.36	0.608571429	0.126618498	-0.626837853	-0.467448513	-2.931488472	66	MODIFIER	MODERATE	NO	0	0.0714285714285714	C	B	-0.487786240701084	-0.204740378631722	-1.28869665829397	-0.999611805901728	0.2327820043509221
AL1G47440	AT1G33100	OG0000536	.	protein_coding	MATE efflux family protein	.	MATE efflux family protein%3B FUNCTIONS IN: antiporter activity%2C drug transmembrane transporter activity%2C transporter activity%3B INVOLVED IN: drug transmembrane transport%2C transmembrane transport%3B LOCATED IN: membrane%3B CONTAINS InterPro DOMAIN/s: Multi antimicrobial extrusion protein MatE (InterPro:IPR002528)%3B BEST Arabidopsis thaliana protein match is: MATE efflux family protein (TA…	.	MATE efflux family protein%3B FUNCTIONS IN: antiporter activity%2C drug transmembrane transporter activity%2C transporter activity%3B INVOLVED IN: drug transmembrane transport%2C transmembrane transport%3B LOCATED IN: membrane%3B CONTAINS InterPro DOMAIN/s: Multi antimicrobial extrusion protein MatE (InterPro:IPR002528)%3B BEST Arabidopsis thaliana protein match is: MATE efflux family protein (TA…	scaffold_1	15296669	15303073	6405	+	scaffold_1	15297886	15301742	3857	*	0.365449696	-0.17980911	288.9683401	0.629142857	2.166813268	0.066034409	18.6079	-0.248571429	0.569714286	0.296421053	0.257142857	0.36	0.608571429	0.126618498	-0.626837853	-0.467448513	-2.931488472	66	MODIFIER	MODERATE	NO	0	0.0714285714285714	C	B	-0.487786240701084	-0.204740378631722	-1.28869665829397	-0.999611805901728	0.2327820043509221
AL1G47440	AT1G33080	OG0000536	.	protein_coding	MATE efflux family protein	.	MATE efflux family protein%3B FUNCTIONS IN: antiporter activity%2C drug transmembrane transporter activity%2C transporter activity%3B INVOLVED IN: drug transmembrane transport%2C transmembrane transport%3B LOCATED IN: membrane%3B EXPRESSED IN: 22 plant structures%3B EXPRESSED DURING: 13 growth stages%3B CONTAINS InterPro DOMAIN/s: Multi antimicrobial extrusion protein MatE (InterPro:IPR002528)%3B…	.	MATE efflux family protein%3B FUNCTIONS IN: antiporter activity%2C drug transmembrane transporter activity%2C transporter activity%3B INVOLVED IN: drug transmembrane transport%2C transmembrane transport%3B LOCATED IN: membrane%3B EXPRESSED IN: 22 plant structures%3B EXPRESSED DURING: 13 growth stages%3B CONTAINS InterPro DOMAIN/s: Multi antimicrobial extrusion protein MatE (InterPro:IPR002528)%3B…	scaffold_1	15296669	15303073	6405	+	scaffold_1	15297886	15301742	3857	*	0.365449696	-0.17980911	288.9683401	0.629142857	2.166813268	0.066034409	18.6079	-0.248571429	0.569714286	0.296421053	0.257142857	0.36	0.608571429	0.126618498	-0.626837853	-0.467448513	-2.931488472	66	MODIFIER	MODERATE	NO	0	0.0714285714285714	C	B	-0.487786240701084	-0.204740378631722	-1.28869665829397	-0.999611805901728	0.2327820043509221
AL1G47440	AT1G33080	OG0000536	.	protein_coding	MATE efflux family protein	.	MATE efflux family protein%3B FUNCTIONS IN: antiporter activity%2C drug transmembrane transporter activity%2C transporter activity%3B INVOLVED IN: drug transmembrane transport%2C transmembrane transport%3B LOCATED IN: membrane%3B EXPRESSED IN: 22 plant structures%3B EXPRESSED DURING: 13 growth stages%3B CONTAINS InterPro DOMAIN/s: Multi antimicrobial extrusion protein MatE (InterPro:IPR002528)%3B…	.	MATE efflux family protein%3B FUNCTIONS IN: antiporter activity%2C drug transmembrane transporter activity%2C transporter activity%3B INVOLVED IN: drug transmembrane transport%2C transmembrane transport%3B LOCATED IN: membrane%3B EXPRESSED IN: 22 plant structures%3B EXPRESSED DURING: 13 growth stages%3B CONTAINS InterPro DOMAIN/s: Multi antimicrobial extrusion protein MatE (InterPro:IPR002528)%3B…	scaffold_1	15296669	15303073	6405	+	scaffold_1	15297886	15301742	3857	*	0.365449696	-0.17980911	288.9683401	0.629142857	2.166813268	0.066034409	18.6079	-0.248571429	0.569714286	0.296421053	0.257142857	0.36	0.608571429	0.126618498	-0.626837853	-0.467448513	-2.931488472	66	MODIFIER	MODERATE	NO	0	0.0714285714285714	C	B	-0.487786240701084	-0.204740378631722	-1.28869665829397	-0.999611805901728	0.2327820043509221
AL1G53790	AT1G47560	OG0003213	SEC3B	protein_coding	exocyst complex component sec3B	exocyst complex component sec3B	exocyst complex component sec3B (SEC3B)%3B CONTAINS InterPro DOMAIN/s: Exocyst complex%2C component Exoc1 (InterPro:IPR019160)%3B BEST Arabidopsis thaliana protein match is: exocyst complex component sec3A (TAIR:AT1G47550.1)%3B Has 437 Blast hits to 422 proteins in 153 species: Archae - 2%3B Bacteria - 6%3B Metazoa - 176%3B Fungi - 108%3B Plants - 103%3B Viruses - 0%3B Other Eukaryotes - 42 (sour…	Encodes a member of the exocyst complex gene family. The exocyst is a protein complex involved in tethering vesicles to the plasma membrane during regulated or polarized secretion.	exocyst complex component sec3B (SEC3B)%3B CONTAINS InterPro DOMAIN/s: Exocyst complex%2C component Exoc1 (InterPro:IPR019160)%3B BEST Arabidopsis thaliana protein match is: exocyst complex component sec3A (TAIR:AT1G47550.1)%3B Has 437 Blast hits to 422 proteins in 153 species: Archae - 2%3B Bacteria - 6%3B Metazoa - 176%3B Fungi - 108%3B Plants - 103%3B Viruses - 0%3B Other Eukaryotes - 42 (sour…	scaffold_1	23756435	23763140	6706	+	scaffold_1	23757001	23757526	526	*	0.473993506	-0.001715283	290.1022206	0.670571429	2.20900119	0.091733162	9.8688	0.153714286	0.643428571	0.096	0.424615385	0.588	0.434285714	-1.617333385	1.204942907	-2.962097213	-0.317092572	60	MODIFIER		NO	NO	NO	A	A	-1.66998580925972	0.647104050199599	-6.77994103969441	-0.132180073507669	-0.9494175642077138
AL1G53790	AT1G47560	OG0003213	SEC3B	protein_coding	exocyst complex component sec3B	exocyst complex component sec3B	exocyst complex component sec3B (SEC3B)%3B CONTAINS InterPro DOMAIN/s: Exocyst complex%2C component Exoc1 (InterPro:IPR019160)%3B BEST Arabidopsis thaliana protein match is: exocyst complex component sec3A (TAIR:AT1G47550.1)%3B Has 437 Blast hits to 422 proteins in 153 species: Archae - 2%3B Bacteria - 6%3B Metazoa - 176%3B Fungi - 108%3B Plants - 103%3B Viruses - 0%3B Other Eukaryotes - 42 (sour…	Encodes a member of the exocyst complex gene family. The exocyst is a protein complex involved in tethering vesicles to the plasma membrane during regulated or polarized secretion.	exocyst complex component sec3B (SEC3B)%3B CONTAINS InterPro DOMAIN/s: Exocyst complex%2C component Exoc1 (InterPro:IPR019160)%3B BEST Arabidopsis thaliana protein match is: exocyst complex component sec3A (TAIR:AT1G47550.1)%3B Has 437 Blast hits to 422 proteins in 153 species: Archae - 2%3B Bacteria - 6%3B Metazoa - 176%3B Fungi - 108%3B Plants - 103%3B Viruses - 0%3B Other Eukaryotes - 42 (sour…	scaffold_1	23756435	23763140	6706	+	scaffold_1	23757001	23757526	526	*	0.473993506	-0.001715283	290.1022206	0.670571429	2.20900119	0.091733162	9.8688	0.153714286	0.643428571	0.096	0.424615385	0.588	0.434285714	-1.617333385	1.204942907	-2.962097213	-0.317092572	60	MODIFIER		NO	NO	NO	A	A	-1.66998580925972	0.647104050199599	-6.77994103969441	-0.132180073507669	-0.9494175642077138
AL1G53790	AT1G47550	OG0003213	SEC3A	protein_coding	exocyst complex component sec3A	exocyst complex component sec3A	exocyst complex component sec3A (SEC3A)%3B INVOLVED IN: biological_process unknown%3B LOCATED IN: plasma membrane%2C exocyst%3B EXPRESSED IN: male gametophyte%2C cultured cell%2C pollen tube%3B EXPRESSED DURING: L mature pollen stage%2C M germinated pollen stage%3B CONTAINS InterPro DOMAIN/s: Exocyst complex%2C component Exoc1 (InterPro:IPR019160)%3B BEST Arabidopsis thaliana protein match is: ex…	Encodes a member of the exocyst complex gene family. The exocyst is a protein complex involved in tethering vesicles to the plasma membrane during regulated or polarized secretion.	exocyst complex component sec3A (SEC3A)%3B INVOLVED IN: biological_process unknown%3B LOCATED IN: plasma membrane%2C exocyst%3B EXPRESSED IN: male gametophyte%2C cultured cell%2C pollen tube%3B EXPRESSED DURING: L mature pollen stage%2C M germinated pollen stage%3B CONTAINS InterPro DOMAIN/s: Exocyst complex%2C component Exoc1 (InterPro:IPR019160)%3B BEST Arabidopsis thaliana protein match is: ex…	scaffold_1	23756435	23763140	6706	+	scaffold_1	23757001	23757526	526	*	0.473993506	-0.001715283	290.1022206	0.670571429	2.20900119	0.091733162	9.8688	0.153714286	0.643428571	0.096	0.424615385	0.588	0.434285714	-1.617333385	1.204942907	-2.962097213	-0.317092572	60	MODIFIER		NO	NO	NO	A	A	-1.66998580925972	0.647104050199599	-6.77994103969441	-0.132180073507669	-0.9494175642077138
AL1G53790	AT1G47550	OG0003213	SEC3A	protein_coding	exocyst complex component sec3A	exocyst complex component sec3A	exocyst complex component sec3A (SEC3A)%3B INVOLVED IN: biological_process unknown%3B LOCATED IN: plasma membrane%2C exocyst%3B EXPRESSED IN: male gametophyte%2C cultured cell%2C pollen tube%3B EXPRESSED DURING: L mature pollen stage%2C M germinated pollen stage%3B CONTAINS InterPro DOMAIN/s: Exocyst complex%2C component Exoc1 (InterPro:IPR019160)%3B BEST Arabidopsis thaliana protein match is: ex…	Encodes a member of the exocyst complex gene family. The exocyst is a protein complex involved in tethering vesicles to the plasma membrane during regulated or polarized secretion.	exocyst complex component sec3A (SEC3A)%3B INVOLVED IN: biological_process unknown%3B LOCATED IN: plasma membrane%2C exocyst%3B EXPRESSED IN: male gametophyte%2C cultured cell%2C pollen tube%3B EXPRESSED DURING: L mature pollen stage%2C M germinated pollen stage%3B CONTAINS InterPro DOMAIN/s: Exocyst complex%2C component Exoc1 (InterPro:IPR019160)%3B BEST Arabidopsis thaliana protein match is: ex…	scaffold_1	23756435	23763140	6706	+	scaffold_1	23757001	23757526	526	*	0.473993506	-0.001715283	290.1022206	0.670571429	2.20900119	0.091733162	9.8688	0.153714286	0.643428571	0.096	0.424615385	0.588	0.434285714	-1.617333385	1.204942907	-2.962097213	-0.317092572	60	MODIFIER		NO	NO	NO	A	A	-1.66998580925972	0.647104050199599	-6.77994103969441	-0.132180073507669	-0.9494175642077138
AL1G62430	AT1G53730	OG0017418	SRF6	protein_coding	STRUBBELIG-receptor family 6	STRUBBELIG-receptor family 6	STRUBBELIG-receptor family 6 (SRF6)%3B FUNCTIONS IN: protein serine/threonine kinase activity%2C protein kinase activity%2C ATP binding%3B INVOLVED IN: transmembrane receptor protein tyrosine kinase signaling pathway%2C protein amino acid phosphorylation%3B LOCATED IN: plasma membrane%3B EXPRESSED IN: 22 plant structures%3B EXPRESSED DURING: 13 growth stages%3B CONTAINS InterPro DOMAIN/s: Protein…	.	STRUBBELIG-receptor family 6 (SRF6)%3B FUNCTIONS IN: protein serine/threonine kinase activity%2C protein kinase activity%2C ATP binding%3B INVOLVED IN: transmembrane receptor protein tyrosine kinase signaling pathway%2C protein amino acid phosphorylation%3B LOCATED IN: plasma membrane%3B EXPRESSED IN: 22 plant structures%3B EXPRESSED DURING: 13 growth stages%3B CONTAINS InterPro DOMAIN/s: Protein…	scaffold_1	28757484	28761588	4105	+	scaffold_1	28760733	28761339	607	*	0.866145052	-0.037652757	233.401212	0.880285714	5.384768862	0.012212842	3.757	-0.628285714	0.880285714	0.010736842	0.049230769	0.126	0.754285714	-2.359245688	-2.900938378	-0.690440534	-5.617068419	69	MODIFIER	MODERATE	NO	NO	NO	A	B	-2.43605112968571	-2.07068531797653	0.0444378158032405	0.0826125459422923	-1.715482884633704
AL1G62430	AT1G53730	OG0017418	SRF6	protein_coding	STRUBBELIG-receptor family 6	STRUBBELIG-receptor family 6	STRUBBELIG-receptor family 6 (SRF6)%3B FUNCTIONS IN: protein serine/threonine kinase activity%2C protein kinase activity%2C ATP binding%3B INVOLVED IN: transmembrane receptor protein tyrosine kinase signaling pathway%2C protein amino acid phosphorylation%3B LOCATED IN: plasma membrane%3B EXPRESSED IN: 22 plant structures%3B EXPRESSED DURING: 13 growth stages%3B CONTAINS InterPro DOMAIN/s: Protein…	.	STRUBBELIG-receptor family 6 (SRF6)%3B FUNCTIONS IN: protein serine/threonine kinase activity%2C protein kinase activity%2C ATP binding%3B INVOLVED IN: transmembrane receptor protein tyrosine kinase signaling pathway%2C protein amino acid phosphorylation%3B LOCATED IN: plasma membrane%3B EXPRESSED IN: 22 plant structures%3B EXPRESSED DURING: 13 growth stages%3B CONTAINS InterPro DOMAIN/s: Protein…	scaffold_1	28757484	28761588	4105	+	scaffold_1	28760733	28761339	607	*	0.866145052	-0.037652757	233.401212	0.880285714	5.384768862	0.012212842	3.757	-0.628285714	0.880285714	0.010736842	0.049230769	0.126	0.754285714	-2.359245688	-2.900938378	-0.690440534	-5.617068419	83	MODIFIER	MODERATE	NO	NO	NO	A	B	-2.43605112968571	-2.07068531797653	0.0444378158032405	0.0826125459422923	-1.715482884633704
AL1G62430	AT1G53730	OG0017418	SRF6	protein_coding	STRUBBELIG-receptor family 6	STRUBBELIG-receptor family 6	STRUBBELIG-receptor family 6 (SRF6)%3B FUNCTIONS IN: protein serine/threonine kinase activity%2C protein kinase activity%2C ATP binding%3B INVOLVED IN: transmembrane receptor protein tyrosine kinase signaling pathway%2C protein amino acid phosphorylation%3B LOCATED IN: plasma membrane%3B EXPRESSED IN: 22 plant structures%3B EXPRESSED DURING: 13 growth stages%3B CONTAINS InterPro DOMAIN/s: Protein…	.	STRUBBELIG-receptor family 6 (SRF6)%3B FUNCTIONS IN: protein serine/threonine kinase activity%2C protein kinase activity%2C ATP binding%3B INVOLVED IN: transmembrane receptor protein tyrosine kinase signaling pathway%2C protein amino acid phosphorylation%3B LOCATED IN: plasma membrane%3B EXPRESSED IN: 22 plant structures%3B EXPRESSED DURING: 13 growth stages%3B CONTAINS InterPro DOMAIN/s: Protein…	scaffold_1	28757484	28761588	4105	+	scaffold_1	28761340	28762053	714	*	0.850724759	-0.052820317	217.8381772	0.857142857	5.309419181	0.012212842	4.9356	-0.377142857	0.857142857	0	0.031648352	0.24	0.617142857	-2.452671681	-3.093251319	-1.430964837	-4.659319426	74	MODIFIER	MODERATE	NO	NO	NO	A	B	-1.51677274517452	-1.37602646827479	-0.789300252124225	-0.132180073507667	-0.796204500122514
AL1G62430	AT1G53730	OG0017418	SRF6	protein_coding	STRUBBELIG-receptor family 6	STRUBBELIG-receptor family 6	STRUBBELIG-receptor family 6 (SRF6)%3B FUNCTIONS IN: protein serine/threonine kinase activity%2C protein kinase activity%2C ATP binding%3B INVOLVED IN: transmembrane receptor protein tyrosine kinase signaling pathway%2C protein amino acid phosphorylation%3B LOCATED IN: plasma membrane%3B EXPRESSED IN: 22 plant structures%3B EXPRESSED DURING: 13 growth stages%3B CONTAINS InterPro DOMAIN/s: Protein…	.	STRUBBELIG-receptor family 6 (SRF6)%3B FUNCTIONS IN: protein serine/threonine kinase activity%2C protein kinase activity%2C ATP binding%3B INVOLVED IN: transmembrane receptor protein tyrosine kinase signaling pathway%2C protein amino acid phosphorylation%3B LOCATED IN: plasma membrane%3B EXPRESSED IN: 22 plant structures%3B EXPRESSED DURING: 13 growth stages%3B CONTAINS InterPro DOMAIN/s: Protein…	scaffold_1	28757484	28761588	4105	+	scaffold_1	28760733	28761339	607	*	0.866145052	-0.037652757	233.401212	0.880285714	5.384768862	0.012212842	3.757	-0.628285714	0.880285714	0.010736842	0.049230769	0.126	0.754285714	-2.359245688	-2.900938378	-0.690440534	-5.617068419	71	MODIFIER	MODERATE	NO	NO	NO	A	B	-2.43605112968571	-2.07068531797653	0.0444378158032405	0.0826125459422923	-1.715482884633704
AL1G62430	AT1G53730	OG0017418	SRF6	protein_coding	STRUBBELIG-receptor family 6	STRUBBELIG-receptor family 6	STRUBBELIG-receptor family 6 (SRF6)%3B FUNCTIONS IN: protein serine/threonine kinase activity%2C protein kinase activity%2C ATP binding%3B INVOLVED IN: transmembrane receptor protein tyrosine kinase signaling pathway%2C protein amino acid phosphorylation%3B LOCATED IN: plasma membrane%3B EXPRESSED IN: 22 plant structures%3B EXPRESSED DURING: 13 growth stages%3B CONTAINS InterPro DOMAIN/s: Protein…	.	STRUBBELIG-receptor family 6 (SRF6)%3B FUNCTIONS IN: protein serine/threonine kinase activity%2C protein kinase activity%2C ATP binding%3B INVOLVED IN: transmembrane receptor protein tyrosine kinase signaling pathway%2C protein amino acid phosphorylation%3B LOCATED IN: plasma membrane%3B EXPRESSED IN: 22 plant structures%3B EXPRESSED DURING: 13 growth stages%3B CONTAINS InterPro DOMAIN/s: Protein…	scaffold_1	28757484	28761588	4105	+	scaffold_1	28761340	28762053	714	*	0.850724759	-0.052820317	217.8381772	0.857142857	5.309419181	0.012212842	4.9356	-0.377142857	0.857142857	0	0.031648352	0.24	0.617142857	-2.452671681	-3.093251319	-1.430964837	-4.659319426	107	MODIFIER	MODERATE	NO	NO	NO	A	B	-1.51677274517452	-1.37602646827479	-0.789300252124225	-0.132180073507667	-0.796204500122514
AL1G62430	AT1G53730	OG0017418	SRF6	protein_coding	STRUBBELIG-receptor family 6	STRUBBELIG-receptor family 6	STRUBBELIG-receptor family 6 (SRF6)%3B FUNCTIONS IN: protein serine/threonine kinase activity%2C protein kinase activity%2C ATP binding%3B INVOLVED IN: transmembrane receptor protein tyrosine kinase signaling pathway%2C protein amino acid phosphorylation%3B LOCATED IN: plasma membrane%3B EXPRESSED IN: 22 plant structures%3B EXPRESSED DURING: 13 growth stages%3B CONTAINS InterPro DOMAIN/s: Protein…	.	STRUBBELIG-receptor family 6 (SRF6)%3B FUNCTIONS IN: protein serine/threonine kinase activity%2C protein kinase activity%2C ATP binding%3B INVOLVED IN: transmembrane receptor protein tyrosine kinase signaling pathway%2C protein amino acid phosphorylation%3B LOCATED IN: plasma membrane%3B EXPRESSED IN: 22 plant structures%3B EXPRESSED DURING: 13 growth stages%3B CONTAINS InterPro DOMAIN/s: Protein…	scaffold_1	28757484	28761588	4105	+	scaffold_1	28761340	28762053	714	*	0.850724759	-0.052820317	217.8381772	0.857142857	5.309419181	0.012212842	4.9356	-0.377142857	0.857142857	0	0.031648352	0.24	0.617142857	-2.452671681	-3.093251319	-1.430964837	-4.659319426	104	MODIFIER	MODERATE	NO	NO	NO	A	B	-1.51677274517452	-1.37602646827479	-0.789300252124225	-0.132180073507667	-0.796204500122514
AL1G62430	AT1G53730	OG0017418	SRF6	protein_coding	STRUBBELIG-receptor family 6	STRUBBELIG-receptor family 6	STRUBBELIG-receptor family 6 (SRF6)%3B FUNCTIONS IN: protein serine/threonine kinase activity%2C protein kinase activity%2C ATP binding%3B INVOLVED IN: transmembrane receptor protein tyrosine kinase signaling pathway%2C protein amino acid phosphorylation%3B LOCATED IN: plasma membrane%3B EXPRESSED IN: 22 plant structures%3B EXPRESSED DURING: 13 growth stages%3B CONTAINS InterPro DOMAIN/s: Protein…	.	STRUBBELIG-receptor family 6 (SRF6)%3B FUNCTIONS IN: protein serine/threonine kinase activity%2C protein kinase activity%2C ATP binding%3B INVOLVED IN: transmembrane receptor protein tyrosine kinase signaling pathway%2C protein amino acid phosphorylation%3B LOCATED IN: plasma membrane%3B EXPRESSED IN: 22 plant structures%3B EXPRESSED DURING: 13 growth stages%3B CONTAINS InterPro DOMAIN/s: Protein…	scaffold_1	28757484	28761588	4105	+	scaffold_1	28761340	28762053	714	*	0.850724759	-0.052820317	217.8381772	0.857142857	5.309419181	0.012212842	4.9356	-0.377142857	0.857142857	0	0.031648352	0.24	0.617142857	-2.452671681	-3.093251319	-1.430964837	-4.659319426	72	MODIFIER	MODERATE	NO	NO	NO	A	B	-1.51677274517452	-1.37602646827479	-0.789300252124225	-0.132180073507667	-0.796204500122514
AL1G62430	AT1G53730	OG0017418	SRF6	protein_coding	STRUBBELIG-receptor family 6	STRUBBELIG-receptor family 6	STRUBBELIG-receptor family 6 (SRF6)%3B FUNCTIONS IN: protein serine/threonine kinase activity%2C protein kinase activity%2C ATP binding%3B INVOLVED IN: transmembrane receptor protein tyrosine kinase signaling pathway%2C protein amino acid phosphorylation%3B LOCATED IN: plasma membrane%3B EXPRESSED IN: 22 plant structures%3B EXPRESSED DURING: 13 growth stages%3B CONTAINS InterPro DOMAIN/s: Protein…	.	STRUBBELIG-receptor family 6 (SRF6)%3B FUNCTIONS IN: protein serine/threonine kinase activity%2C protein kinase activity%2C ATP binding%3B INVOLVED IN: transmembrane receptor protein tyrosine kinase signaling pathway%2C protein amino acid phosphorylation%3B LOCATED IN: plasma membrane%3B EXPRESSED IN: 22 plant structures%3B EXPRESSED DURING: 13 growth stages%3B CONTAINS InterPro DOMAIN/s: Protein…	scaffold_1	28757484	28761588	4105	+	scaffold_1	28760733	28761339	607	*	0.866145052	-0.037652757	233.401212	0.880285714	5.384768862	0.012212842	3.757	-0.628285714	0.880285714	0.010736842	0.049230769	0.126	0.754285714	-2.359245688	-2.900938378	-0.690440534	-5.617068419	82	MODIFIER	MODERATE	NO	NO	NO	A	B	-2.43605112968571	-2.07068531797653	0.0444378158032405	0.0826125459422923	-1.715482884633704
AL1G62440	AT1G53780	OG0002360	.	protein_coding	26S proteasome regulatory complex ATPase	.	peptidyl-prolyl cis-trans isomerases%3Bhydrolases%3Bnucleoside-triphosphatases%3BATP binding%3Bnucleotide binding%3BATPases%3B FUNCTIONS IN: in 6 functions%3B INVOLVED IN: protein folding%2C protein catabolic process%3B LOCATED IN: membrane%3B EXPRESSED IN: leaf%3B CONTAINS InterPro DOMAIN/s: ATPase%2C AAA+ type%2C core (InterPro:IPR003593)%2C ATPase%2C AAA-type%2C core (InterPro:IPR003959)%2C Pe…	.	peptidyl-prolyl cis-trans isomerases%3Bhydrolases%3Bnucleoside-triphosphatases%3BATP binding%3Bnucleotide binding%3BATPases%3B FUNCTIONS IN: in 6 functions%3B INVOLVED IN: protein folding%2C protein catabolic process%3B LOCATED IN: membrane%3B EXPRESSED IN: leaf%3B CONTAINS InterPro DOMAIN/s: ATPase%2C AAA+ type%2C core (InterPro:IPR003593)%2C ATPase%2C AAA-type%2C core (InterPro:IPR003959)%2C Pe…	scaffold_1	28761595	28764599	3005	-	scaffold_1	28761340	28762053	714	*	0.850724759	-0.052820317	217.8381772	0.857142857	5.309419181	0.012212842	4.9356	-0.377142857	0.857142857	0	0.031648352	0.24	0.617142857	-2.452671681	-3.093251319	-1.430964837	-4.659319426	74	MODIFIER	NO	NO	NO	NO	B	B	-1.51677274517452	-1.37602646827479	-0.789300252124225	-0.132180073507667	-0.796204500122514
AL1G62440	AT1G53780	OG0002360	.	protein_coding	26S proteasome regulatory complex ATPase	.	peptidyl-prolyl cis-trans isomerases%3Bhydrolases%3Bnucleoside-triphosphatases%3BATP binding%3Bnucleotide binding%3BATPases%3B FUNCTIONS IN: in 6 functions%3B INVOLVED IN: protein folding%2C protein catabolic process%3B LOCATED IN: membrane%3B EXPRESSED IN: leaf%3B CONTAINS InterPro DOMAIN/s: ATPase%2C AAA+ type%2C core (InterPro:IPR003593)%2C ATPase%2C AAA-type%2C core (InterPro:IPR003959)%2C Pe…	.	peptidyl-prolyl cis-trans isomerases%3Bhydrolases%3Bnucleoside-triphosphatases%3BATP binding%3Bnucleotide binding%3BATPases%3B FUNCTIONS IN: in 6 functions%3B INVOLVED IN: protein folding%2C protein catabolic process%3B LOCATED IN: membrane%3B EXPRESSED IN: leaf%3B CONTAINS InterPro DOMAIN/s: ATPase%2C AAA+ type%2C core (InterPro:IPR003593)%2C ATPase%2C AAA-type%2C core (InterPro:IPR003959)%2C Pe…	scaffold_1	28761595	28764599	3005	-	scaffold_1	28761340	28762053	714	*	0.850724759	-0.052820317	217.8381772	0.857142857	5.309419181	0.012212842	4.9356	-0.377142857	0.857142857	0	0.031648352	0.24	0.617142857	-2.452671681	-3.093251319	-1.430964837	-4.659319426	74	MODIFIER	NO	NO	NO	NO	C	B	-1.51677274517452	-1.37602646827479	-0.789300252124225	-0.132180073507667	-0.796204500122514
AL1G62440	AT1G53780	OG0002360	.	protein_coding	26S proteasome regulatory complex ATPase	.	peptidyl-prolyl cis-trans isomerases%3Bhydrolases%3Bnucleoside-triphosphatases%3BATP binding%3Bnucleotide binding%3BATPases%3B FUNCTIONS IN: in 6 functions%3B INVOLVED IN: protein folding%2C protein catabolic process%3B LOCATED IN: membrane%3B EXPRESSED IN: leaf%3B CONTAINS InterPro DOMAIN/s: ATPase%2C AAA+ type%2C core (InterPro:IPR003593)%2C ATPase%2C AAA-type%2C core (InterPro:IPR003959)%2C Pe…	.	peptidyl-prolyl cis-trans isomerases%3Bhydrolases%3Bnucleoside-triphosphatases%3BATP binding%3Bnucleotide binding%3BATPases%3B FUNCTIONS IN: in 6 functions%3B INVOLVED IN: protein folding%2C protein catabolic process%3B LOCATED IN: membrane%3B EXPRESSED IN: leaf%3B CONTAINS InterPro DOMAIN/s: ATPase%2C AAA+ type%2C core (InterPro:IPR003593)%2C ATPase%2C AAA-type%2C core (InterPro:IPR003959)%2C Pe…	scaffold_1	28761595	28764599	3005	-	scaffold_1	28761340	28762053	714	*	0.850724759	-0.052820317	217.8381772	0.857142857	5.309419181	0.012212842	4.9356	-0.377142857	0.857142857	0	0.031648352	0.24	0.617142857	-2.452671681	-3.093251319	-1.430964837	-4.659319426	107	MODIFIER	NO	NO	NO	NO	C	B	-1.51677274517452	-1.37602646827479	-0.789300252124225	-0.132180073507667	-0.796204500122514
AL1G62440	AT1G53780	OG0002360	.	protein_coding	26S proteasome regulatory complex ATPase	.	peptidyl-prolyl cis-trans isomerases%3Bhydrolases%3Bnucleoside-triphosphatases%3BATP binding%3Bnucleotide binding%3BATPases%3B FUNCTIONS IN: in 6 functions%3B INVOLVED IN: protein folding%2C protein catabolic process%3B LOCATED IN: membrane%3B EXPRESSED IN: leaf%3B CONTAINS InterPro DOMAIN/s: ATPase%2C AAA+ type%2C core (InterPro:IPR003593)%2C ATPase%2C AAA-type%2C core (InterPro:IPR003959)%2C Pe…	.	peptidyl-prolyl cis-trans isomerases%3Bhydrolases%3Bnucleoside-triphosphatases%3BATP binding%3Bnucleotide binding%3BATPases%3B FUNCTIONS IN: in 6 functions%3B INVOLVED IN: protein folding%2C protein catabolic process%3B LOCATED IN: membrane%3B EXPRESSED IN: leaf%3B CONTAINS InterPro DOMAIN/s: ATPase%2C AAA+ type%2C core (InterPro:IPR003593)%2C ATPase%2C AAA-type%2C core (InterPro:IPR003959)%2C Pe…	scaffold_1	28761595	28764599	3005	-	scaffold_1	28761340	28762053	714	*	0.850724759	-0.052820317	217.8381772	0.857142857	5.309419181	0.012212842	4.9356	-0.377142857	0.857142857	0	0.031648352	0.24	0.617142857	-2.452671681	-3.093251319	-1.430964837	-4.659319426	104	MODIFIER	NO	NO	NO	NO	C	B	-1.51677274517452	-1.37602646827479	-0.789300252124225	-0.132180073507667	-0.796204500122514
AL1G62440	AT1G53780	OG0002360	.	protein_coding	26S proteasome regulatory complex ATPase	.	peptidyl-prolyl cis-trans isomerases%3Bhydrolases%3Bnucleoside-triphosphatases%3BATP binding%3Bnucleotide binding%3BATPases%3B FUNCTIONS IN: in 6 functions%3B INVOLVED IN: protein folding%2C protein catabolic process%3B LOCATED IN: membrane%3B EXPRESSED IN: leaf%3B CONTAINS InterPro DOMAIN/s: ATPase%2C AAA+ type%2C core (InterPro:IPR003593)%2C ATPase%2C AAA-type%2C core (InterPro:IPR003959)%2C Pe…	.	peptidyl-prolyl cis-trans isomerases%3Bhydrolases%3Bnucleoside-triphosphatases%3BATP binding%3Bnucleotide binding%3BATPases%3B FUNCTIONS IN: in 6 functions%3B INVOLVED IN: protein folding%2C protein catabolic process%3B LOCATED IN: membrane%3B EXPRESSED IN: leaf%3B CONTAINS InterPro DOMAIN/s: ATPase%2C AAA+ type%2C core (InterPro:IPR003593)%2C ATPase%2C AAA-type%2C core (InterPro:IPR003959)%2C Pe…	scaffold_1	28761595	28764599	3005	-	scaffold_1	28761340	28762053	714	*	0.850724759	-0.052820317	217.8381772	0.857142857	5.309419181	0.012212842	4.9356	-0.377142857	0.857142857	0	0.031648352	0.24	0.617142857	-2.452671681	-3.093251319	-1.430964837	-4.659319426	72	MODIFIER	NO	NO	NO	NO	C	B	-1.51677274517452	-1.37602646827479	-0.789300252124225	-0.132180073507667	-0.796204500122514
AL1G62440	AT1G53750	OG0002360	RPT1A	protein_coding	regulatory particle triple-A 1A	regulatory particle triple-A 1A	regulatory particle triple-A 1A (RPT1A)%3B FUNCTIONS IN: ATPase activity%3B INVOLVED IN: ubiquitin-dependent protein catabolic process%3B LOCATED IN: proteasome regulatory particle%2C base subcomplex%2C proteasome complex%2C nucleus%2C plasma membrane%3B EXPRESSED IN: pollen tube%3B CONTAINS InterPro DOMAIN/s: ATPase%2C AAA+ type%2C core (InterPro:IPR003593)%2C ATPase%2C AAA-type%2C core (InterPr…	26S proteasome AAA-ATPase subunit RPT1a (RPT1a) mR%2C	regulatory particle triple-A 1A (RPT1A)%3B FUNCTIONS IN: ATPase activity%3B INVOLVED IN: ubiquitin-dependent protein catabolic process%3B LOCATED IN: proteasome regulatory particle%2C base subcomplex%2C proteasome complex%2C nucleus%2C plasma membrane%3B EXPRESSED IN: pollen tube%3B CONTAINS InterPro DOMAIN/s: ATPase%2C AAA+ type%2C core (InterPro:IPR003593)%2C ATPase%2C AAA-type%2C core (InterPr…	scaffold_1	28761595	28764599	3005	-	scaffold_1	28761340	28762053	714	*	0.850724759	-0.052820317	217.8381772	0.857142857	5.309419181	0.012212842	4.9356	-0.377142857	0.857142857	0	0.031648352	0.24	0.617142857	-2.452671681	-3.093251319	-1.430964837	-4.659319426	74	MODIFIER	NO	NO	NO	NO	B	B	-1.51677274517452	-1.37602646827479	-0.789300252124225	-0.132180073507667	-0.796204500122514
AL1G62440	AT1G53750	OG0002360	RPT1A	protein_coding	regulatory particle triple-A 1A	regulatory particle triple-A 1A	regulatory particle triple-A 1A (RPT1A)%3B FUNCTIONS IN: ATPase activity%3B INVOLVED IN: ubiquitin-dependent protein catabolic process%3B LOCATED IN: proteasome regulatory particle%2C base subcomplex%2C proteasome complex%2C nucleus%2C plasma membrane%3B EXPRESSED IN: pollen tube%3B CONTAINS InterPro DOMAIN/s: ATPase%2C AAA+ type%2C core (InterPro:IPR003593)%2C ATPase%2C AAA-type%2C core (InterPr…	26S proteasome AAA-ATPase subunit RPT1a (RPT1a) mR%2C	regulatory particle triple-A 1A (RPT1A)%3B FUNCTIONS IN: ATPase activity%3B INVOLVED IN: ubiquitin-dependent protein catabolic process%3B LOCATED IN: proteasome regulatory particle%2C base subcomplex%2C proteasome complex%2C nucleus%2C plasma membrane%3B EXPRESSED IN: pollen tube%3B CONTAINS InterPro DOMAIN/s: ATPase%2C AAA+ type%2C core (InterPro:IPR003593)%2C ATPase%2C AAA-type%2C core (InterPr…	scaffold_1	28761595	28764599	3005	-	scaffold_1	28761340	28762053	714	*	0.850724759	-0.052820317	217.8381772	0.857142857	5.309419181	0.012212842	4.9356	-0.377142857	0.857142857	0	0.031648352	0.24	0.617142857	-2.452671681	-3.093251319	-1.430964837	-4.659319426	74	MODIFIER	NO	NO	NO	NO	C	B	-1.51677274517452	-1.37602646827479	-0.789300252124225	-0.132180073507667	-0.796204500122514
AL1G62440	AT1G53750	OG0002360	RPT1A	protein_coding	regulatory particle triple-A 1A	regulatory particle triple-A 1A	regulatory particle triple-A 1A (RPT1A)%3B FUNCTIONS IN: ATPase activity%3B INVOLVED IN: ubiquitin-dependent protein catabolic process%3B LOCATED IN: proteasome regulatory particle%2C base subcomplex%2C proteasome complex%2C nucleus%2C plasma membrane%3B EXPRESSED IN: pollen tube%3B CONTAINS InterPro DOMAIN/s: ATPase%2C AAA+ type%2C core (InterPro:IPR003593)%2C ATPase%2C AAA-type%2C core (InterPr…	26S proteasome AAA-ATPase subunit RPT1a (RPT1a) mR%2C	regulatory particle triple-A 1A (RPT1A)%3B FUNCTIONS IN: ATPase activity%3B INVOLVED IN: ubiquitin-dependent protein catabolic process%3B LOCATED IN: proteasome regulatory particle%2C base subcomplex%2C proteasome complex%2C nucleus%2C plasma membrane%3B EXPRESSED IN: pollen tube%3B CONTAINS InterPro DOMAIN/s: ATPase%2C AAA+ type%2C core (InterPro:IPR003593)%2C ATPase%2C AAA-type%2C core (InterPr…	scaffold_1	28761595	28764599	3005	-	scaffold_1	28761340	28762053	714	*	0.850724759	-0.052820317	217.8381772	0.857142857	5.309419181	0.012212842	4.9356	-0.377142857	0.857142857	0	0.031648352	0.24	0.617142857	-2.452671681	-3.093251319	-1.430964837	-4.659319426	107	MODIFIER	NO	NO	NO	NO	C	B	-1.51677274517452	-1.37602646827479	-0.789300252124225	-0.132180073507667	-0.796204500122514
AL1G62440	AT1G53750	OG0002360	RPT1A	protein_coding	regulatory particle triple-A 1A	regulatory particle triple-A 1A	regulatory particle triple-A 1A (RPT1A)%3B FUNCTIONS IN: ATPase activity%3B INVOLVED IN: ubiquitin-dependent protein catabolic process%3B LOCATED IN: proteasome regulatory particle%2C base subcomplex%2C proteasome complex%2C nucleus%2C plasma membrane%3B EXPRESSED IN: pollen tube%3B CONTAINS InterPro DOMAIN/s: ATPase%2C AAA+ type%2C core (InterPro:IPR003593)%2C ATPase%2C AAA-type%2C core (InterPr…	26S proteasome AAA-ATPase subunit RPT1a (RPT1a) mR%2C	regulatory particle triple-A 1A (RPT1A)%3B FUNCTIONS IN: ATPase activity%3B INVOLVED IN: ubiquitin-dependent protein catabolic process%3B LOCATED IN: proteasome regulatory particle%2C base subcomplex%2C proteasome complex%2C nucleus%2C plasma membrane%3B EXPRESSED IN: pollen tube%3B CONTAINS InterPro DOMAIN/s: ATPase%2C AAA+ type%2C core (InterPro:IPR003593)%2C ATPase%2C AAA-type%2C core (InterPr…	scaffold_1	28761595	28764599	3005	-	scaffold_1	28761340	28762053	714	*	0.850724759	-0.052820317	217.8381772	0.857142857	5.309419181	0.012212842	4.9356	-0.377142857	0.857142857	0	0.031648352	0.24	0.617142857	-2.452671681	-3.093251319	-1.430964837	-4.659319426	104	MODIFIER	NO	NO	NO	NO	C	B	-1.51677274517452	-1.37602646827479	-0.789300252124225	-0.132180073507667	-0.796204500122514
AL1G62440	AT1G53750	OG0002360	RPT1A	protein_coding	regulatory particle triple-A 1A	regulatory particle triple-A 1A	regulatory particle triple-A 1A (RPT1A)%3B FUNCTIONS IN: ATPase activity%3B INVOLVED IN: ubiquitin-dependent protein catabolic process%3B LOCATED IN: proteasome regulatory particle%2C base subcomplex%2C proteasome complex%2C nucleus%2C plasma membrane%3B EXPRESSED IN: pollen tube%3B CONTAINS InterPro DOMAIN/s: ATPase%2C AAA+ type%2C core (InterPro:IPR003593)%2C ATPase%2C AAA-type%2C core (InterPr…	26S proteasome AAA-ATPase subunit RPT1a (RPT1a) mR%2C	regulatory particle triple-A 1A (RPT1A)%3B FUNCTIONS IN: ATPase activity%3B INVOLVED IN: ubiquitin-dependent protein catabolic process%3B LOCATED IN: proteasome regulatory particle%2C base subcomplex%2C proteasome complex%2C nucleus%2C plasma membrane%3B EXPRESSED IN: pollen tube%3B CONTAINS InterPro DOMAIN/s: ATPase%2C AAA+ type%2C core (InterPro:IPR003593)%2C ATPase%2C AAA-type%2C core (InterPr…	scaffold_1	28761595	28764599	3005	-	scaffold_1	28761340	28762053	714	*	0.850724759	-0.052820317	217.8381772	0.857142857	5.309419181	0.012212842	4.9356	-0.377142857	0.857142857	0	0.031648352	0.24	0.617142857	-2.452671681	-3.093251319	-1.430964837	-4.659319426	72	MODIFIER	NO	NO	NO	NO	C	B	-1.51677274517452	-1.37602646827479	-0.789300252124225	-0.132180073507667	-0.796204500122514
AL2G11680	AT1G63530	OG0016522	.	protein_coding	hypothetical protein	.	BEST Arabidopsis thaliana protein match is: hydroxyproline-rich glycoprotein family protein (TAIR:AT1G63540.1)%3B Has 10212 Blast hits to 4024 proteins in 434 species: Archae - 1%3B Bacteria - 1259%3B Metazoa - 3608%3B Fungi - 2247%3B Plants - 291%3B Viruses - 90%3B Other Eukaryotes - 2716 (source: NCBI BLink).	.	BEST Arabidopsis thaliana protein match is: hydroxyproline-rich glycoprotein family protein (TAIR:AT1G63540.1)%3B Has 10212 Blast hits to 4024 proteins in 434 species: Archae - 1%3B Bacteria - 1259%3B Metazoa - 3608%3B Fungi - 2247%3B Plants - 291%3B Viruses - 90%3B Other Eukaryotes - 2716 (source: NCBI BLink).	scaffold_2	815213	820318	5106	-	scaffold_2	819555	820090	536	*	0.988	-0.014806342	285.938165	0.994	6.229891078	0.012212842	0	-0.754	0.994	0.010736842	0	0.126	0.88	-2.359245688	-3.439414612	-0.690440534	-6.976036585	12	MODIFIER	MODERATE	NO	NO	NO	B	B	-2.31499389386531	-1.84758320566356	-0.158706485011573	0.0330450183769177	-1.594425648813304
AL2G11680	AT1G63530	OG0016522	.	protein_coding	hypothetical protein	.	BEST Arabidopsis thaliana protein match is: hydroxyproline-rich glycoprotein family protein (TAIR:AT1G63540.1)%3B Has 10212 Blast hits to 4024 proteins in 434 species: Archae - 1%3B Bacteria - 1259%3B Metazoa - 3608%3B Fungi - 2247%3B Plants - 291%3B Viruses - 90%3B Other Eukaryotes - 2716 (source: NCBI BLink).	.	BEST Arabidopsis thaliana protein match is: hydroxyproline-rich glycoprotein family protein (TAIR:AT1G63540.1)%3B Has 10212 Blast hits to 4024 proteins in 434 species: Archae - 1%3B Bacteria - 1259%3B Metazoa - 3608%3B Fungi - 2247%3B Plants - 291%3B Viruses - 90%3B Other Eukaryotes - 2716 (source: NCBI BLink).	scaffold_2	815213	820318	5106	-	scaffold_2	819555	820090	536	*	0.988	-0.014806342	285.938165	0.994	6.229891078	0.012212842	0	-0.754	0.994	0.010736842	0	0.126	0.88	-2.359245688	-3.439414612	-0.690440534	-6.976036585	8	MODIFIER	MODERATE	NO	NO	NO	B	B	-2.31499389386531	-1.84758320566356	-0.158706485011573	0.0330450183769177	-1.594425648813304
AL2G11680	AT1G63530	OG0016522	.	protein_coding	hypothetical protein	.	BEST Arabidopsis thaliana protein match is: hydroxyproline-rich glycoprotein family protein (TAIR:AT1G63540.1)%3B Has 10212 Blast hits to 4024 proteins in 434 species: Archae - 1%3B Bacteria - 1259%3B Metazoa - 3608%3B Fungi - 2247%3B Plants - 291%3B Viruses - 90%3B Other Eukaryotes - 2716 (source: NCBI BLink).	.	BEST Arabidopsis thaliana protein match is: hydroxyproline-rich glycoprotein family protein (TAIR:AT1G63540.1)%3B Has 10212 Blast hits to 4024 proteins in 434 species: Archae - 1%3B Bacteria - 1259%3B Metazoa - 3608%3B Fungi - 2247%3B Plants - 291%3B Viruses - 90%3B Other Eukaryotes - 2716 (source: NCBI BLink).	scaffold_2	815213	820318	5106	-	scaffold_2	819555	820090	536	*	0.988	-0.014806342	285.938165	0.994	6.229891078	0.012212842	0	-0.754	0.994	0.010736842	0	0.126	0.88	-2.359245688	-3.439414612	-0.690440534	-6.976036585	96	MODIFIER	MODERATE	NO	NO	NO	B	B	-2.31499389386531	-1.84758320566356	-0.158706485011573	0.0330450183769177	-1.594425648813304
AL2G15430	AT1G61010	OG0015050	CPSF73-I	protein_coding	cleavage and polyadenylation specificity factor 73-I	cleavage and polyadenylation specificity factor 73-I	cleavage and polyadenylation specificity factor 73-I (CPSF73-I)%3B CONTAINS InterPro DOMAIN/s: Beta-Casp domain (InterPro:IPR022712)%2C R-metabolising metallo-beta-lactamase (InterPro:IPR011108)%2C Beta-lactamase-like (InterPro:IPR001279)%2C Pre-mR 3%26apos%3B-end-processing endonuclease polyadenylation factor C-term (InterPro:IPR021718)%3B BEST Arabidopsis thaliana protein match is: cleavage and…	.	cleavage and polyadenylation specificity factor 73-I (CPSF73-I)%3B CONTAINS InterPro DOMAIN/s: Beta-Casp domain (InterPro:IPR022712)%2C R-metabolising metallo-beta-lactamase (InterPro:IPR011108)%2C Beta-lactamase-like (InterPro:IPR001279)%2C Pre-mR 3%26apos%3B-end-processing endonuclease polyadenylation factor C-term (InterPro:IPR021718)%3B BEST Arabidopsis thaliana protein match is: cleavage and…	scaffold_2	2774565	2777515	2951	+	scaffold_2	2775866	2777091	1226	*	0.696733333	-0.20995113	270.4636322	0.846	5.008271391	0.015592651	8.6111	-0.306	0.846	0.270526316	0	0.374	0.68	-0.098703017	-3.439414612	-0.697595358	-5.390573725	132	MODIFIER	MODERATE	NO	NO	NO	B	B	0.0607543591101205	-3.62732960161472	-0.548066394906634	0	0.7813226041621266
AL2G15430	AT1G61010	OG0015050	CPSF73-I	protein_coding	cleavage and polyadenylation specificity factor 73-I	cleavage and polyadenylation specificity factor 73-I	cleavage and polyadenylation specificity factor 73-I (CPSF73-I)%3B CONTAINS InterPro DOMAIN/s: Beta-Casp domain (InterPro:IPR022712)%2C R-metabolising metallo-beta-lactamase (InterPro:IPR011108)%2C Beta-lactamase-like (InterPro:IPR001279)%2C Pre-mR 3%26apos%3B-end-processing endonuclease polyadenylation factor C-term (InterPro:IPR021718)%3B BEST Arabidopsis thaliana protein match is: cleavage and…	.	cleavage and polyadenylation specificity factor 73-I (CPSF73-I)%3B CONTAINS InterPro DOMAIN/s: Beta-Casp domain (InterPro:IPR022712)%2C R-metabolising metallo-beta-lactamase (InterPro:IPR011108)%2C Beta-lactamase-like (InterPro:IPR001279)%2C Pre-mR 3%26apos%3B-end-processing endonuclease polyadenylation factor C-term (InterPro:IPR021718)%3B BEST Arabidopsis thaliana protein match is: cleavage and…	scaffold_2	2774565	2777515	2951	+	scaffold_2	2775304	2775845	542	*	0.7035	-0.206000754	290.8099234	0.852	5.0503175	0.019754758	1.187	0.308	0.852	0.265263158	0	0.628	0.32	-0.144500072	-3.439414612	-2.241844911	-2.536740576	114	MODIFIER	NO	NO	NO	NO	B	B	-0.204058344247014	-3.62732960161472	-2.19861383902699	0	0.5165099008049922
AL2G15430	AT1G61010	OG0015050	CPSF73-I	protein_coding	cleavage and polyadenylation specificity factor 73-I	cleavage and polyadenylation specificity factor 73-I	cleavage and polyadenylation specificity factor 73-I (CPSF73-I)%3B CONTAINS InterPro DOMAIN/s: Beta-Casp domain (InterPro:IPR022712)%2C R-metabolising metallo-beta-lactamase (InterPro:IPR011108)%2C Beta-lactamase-like (InterPro:IPR001279)%2C Pre-mR 3%26apos%3B-end-processing endonuclease polyadenylation factor C-term (InterPro:IPR021718)%3B BEST Arabidopsis thaliana protein match is: cleavage and…	.	cleavage and polyadenylation specificity factor 73-I (CPSF73-I)%3B CONTAINS InterPro DOMAIN/s: Beta-Casp domain (InterPro:IPR022712)%2C R-metabolising metallo-beta-lactamase (InterPro:IPR011108)%2C Beta-lactamase-like (InterPro:IPR001279)%2C Pre-mR 3%26apos%3B-end-processing endonuclease polyadenylation factor C-term (InterPro:IPR021718)%3B BEST Arabidopsis thaliana protein match is: cleavage and…	scaffold_2	2774565	2777515	2951	+	scaffold_2	2775866	2777091	1226	*	0.696733333	-0.20995113	270.4636322	0.846	5.008271391	0.015592651	8.6111	-0.306	0.846	0.270526316	0	0.374	0.68	-0.098703017	-3.439414612	-0.697595358	-5.390573725	108	MODIFIER	MODERATE	NO	NO	NO	B	B	0.0607543591101205	-3.62732960161472	-0.548066394906634	0	0.7813226041621266
AL2G15430	AT1G61010	OG0015050	CPSF73-I	protein_coding	cleavage and polyadenylation specificity factor 73-I	cleavage and polyadenylation specificity factor 73-I	cleavage and polyadenylation specificity factor 73-I (CPSF73-I)%3B CONTAINS InterPro DOMAIN/s: Beta-Casp domain (InterPro:IPR022712)%2C R-metabolising metallo-beta-lactamase (InterPro:IPR011108)%2C Beta-lactamase-like (InterPro:IPR001279)%2C Pre-mR 3%26apos%3B-end-processing endonuclease polyadenylation factor C-term (InterPro:IPR021718)%3B BEST Arabidopsis thaliana protein match is: cleavage and…	.	cleavage and polyadenylation specificity factor 73-I (CPSF73-I)%3B CONTAINS InterPro DOMAIN/s: Beta-Casp domain (InterPro:IPR022712)%2C R-metabolising metallo-beta-lactamase (InterPro:IPR011108)%2C Beta-lactamase-like (InterPro:IPR001279)%2C Pre-mR 3%26apos%3B-end-processing endonuclease polyadenylation factor C-term (InterPro:IPR021718)%3B BEST Arabidopsis thaliana protein match is: cleavage and…	scaffold_2	2774565	2777515	2951	+	scaffold_2	2775866	2777091	1226	*	0.696733333	-0.20995113	270.4636322	0.846	5.008271391	0.015592651	8.6111	-0.306	0.846	0.270526316	0	0.374	0.68	-0.098703017	-3.439414612	-0.697595358	-5.390573725	128	MODIFIER	MODERATE	NO	NO	NO	B	B	0.0607543591101205	-3.62732960161472	-0.548066394906634	0	0.7813226041621266
AL2G15430	AT1G61010	OG0015050	CPSF73-I	protein_coding	cleavage and polyadenylation specificity factor 73-I	cleavage and polyadenylation specificity factor 73-I	cleavage and polyadenylation specificity factor 73-I (CPSF73-I)%3B CONTAINS InterPro DOMAIN/s: Beta-Casp domain (InterPro:IPR022712)%2C R-metabolising metallo-beta-lactamase (InterPro:IPR011108)%2C Beta-lactamase-like (InterPro:IPR001279)%2C Pre-mR 3%26apos%3B-end-processing endonuclease polyadenylation factor C-term (InterPro:IPR021718)%3B BEST Arabidopsis thaliana protein match is: cleavage and…	.	cleavage and polyadenylation specificity factor 73-I (CPSF73-I)%3B CONTAINS InterPro DOMAIN/s: Beta-Casp domain (InterPro:IPR022712)%2C R-metabolising metallo-beta-lactamase (InterPro:IPR011108)%2C Beta-lactamase-like (InterPro:IPR001279)%2C Pre-mR 3%26apos%3B-end-processing endonuclease polyadenylation factor C-term (InterPro:IPR021718)%3B BEST Arabidopsis thaliana protein match is: cleavage and…	scaffold_2	2774565	2777515	2951	+	scaffold_2	2775304	2775845	542	*	0.7035	-0.206000754	290.8099234	0.852	5.0503175	0.019754758	1.187	0.308	0.852	0.265263158	0	0.628	0.32	-0.144500072	-3.439414612	-2.241844911	-2.536740576	115	MODIFIER	NO	NO	NO	NO	B	B	-0.204058344247014	-3.62732960161472	-2.19861383902699	0	0.5165099008049922
AL2G15430	AT1G61010	OG0015050	CPSF73-I	protein_coding	cleavage and polyadenylation specificity factor 73-I	cleavage and polyadenylation specificity factor 73-I	cleavage and polyadenylation specificity factor 73-I (CPSF73-I)%3B CONTAINS InterPro DOMAIN/s: Beta-Casp domain (InterPro:IPR022712)%2C R-metabolising metallo-beta-lactamase (InterPro:IPR011108)%2C Beta-lactamase-like (InterPro:IPR001279)%2C Pre-mR 3%26apos%3B-end-processing endonuclease polyadenylation factor C-term (InterPro:IPR021718)%3B BEST Arabidopsis thaliana protein match is: cleavage and…	.	cleavage and polyadenylation specificity factor 73-I (CPSF73-I)%3B CONTAINS InterPro DOMAIN/s: Beta-Casp domain (InterPro:IPR022712)%2C R-metabolising metallo-beta-lactamase (InterPro:IPR011108)%2C Beta-lactamase-like (InterPro:IPR001279)%2C Pre-mR 3%26apos%3B-end-processing endonuclease polyadenylation factor C-term (InterPro:IPR021718)%3B BEST Arabidopsis thaliana protein match is: cleavage and…	scaffold_2	2774565	2777515	2951	+	scaffold_2	2775304	2775845	542	*	0.7035	-0.206000754	290.8099234	0.852	5.0503175	0.019754758	1.187	0.308	0.852	0.265263158	0	0.628	0.32	-0.144500072	-3.439414612	-2.241844911	-2.536740576	57	MODIFIER		NO	NO	NO	B	B	-0.204058344247014	-3.62732960161472	-2.19861383902699	0	0.5165099008049922
AL2G15430	AT1G61010	OG0015050	CPSF73-I	protein_coding	cleavage and polyadenylation specificity factor 73-I	cleavage and polyadenylation specificity factor 73-I	cleavage and polyadenylation specificity factor 73-I (CPSF73-I)%3B CONTAINS InterPro DOMAIN/s: Beta-Casp domain (InterPro:IPR022712)%2C R-metabolising metallo-beta-lactamase (InterPro:IPR011108)%2C Beta-lactamase-like (InterPro:IPR001279)%2C Pre-mR 3%26apos%3B-end-processing endonuclease polyadenylation factor C-term (InterPro:IPR021718)%3B BEST Arabidopsis thaliana protein match is: cleavage and…	.	cleavage and polyadenylation specificity factor 73-I (CPSF73-I)%3B CONTAINS InterPro DOMAIN/s: Beta-Casp domain (InterPro:IPR022712)%2C R-metabolising metallo-beta-lactamase (InterPro:IPR011108)%2C Beta-lactamase-like (InterPro:IPR001279)%2C Pre-mR 3%26apos%3B-end-processing endonuclease polyadenylation factor C-term (InterPro:IPR021718)%3B BEST Arabidopsis thaliana protein match is: cleavage and…	scaffold_2	2774565	2777515	2951	+	scaffold_2	2775304	2775845	542	*	0.7035	-0.206000754	290.8099234	0.852	5.0503175	0.019754758	1.187	0.308	0.852	0.265263158	0	0.628	0.32	-0.144500072	-3.439414612	-2.241844911	-2.536740576	106	MODIFIER	NO	NO	NO	NO	B	B	-0.204058344247014	-3.62732960161472	-2.19861383902699	0	0.5165099008049922
AL2G15460	AT1G60995	OG0015051	.	protein_coding	S3 self-incompatibility locus-linked pollen protein	.	FUNCTIONS IN: molecular_function unknown%3B INVOLVED IN: biological_process unknown%3B LOCATED IN: cellular_component unknown%3B EXPRESSED IN: 20 plant structures%3B EXPRESSED DURING: 10 growth stages%3B CONTAINS InterPro DOMAIN/s: Membralin (InterPro:IPR019144)%3B Has 172 Blast hits to 170 proteins in 70 species: Archae - 0%3B Bacteria - 0%3B Metazoa - 110%3B Fungi - 0%3B Plants - 38%3B Viruses …	.	FUNCTIONS IN: molecular_function unknown%3B INVOLVED IN: biological_process unknown%3B LOCATED IN: cellular_component unknown%3B EXPRESSED IN: 20 plant structures%3B EXPRESSED DURING: 10 growth stages%3B CONTAINS InterPro DOMAIN/s: Membralin (InterPro:IPR019144)%3B Has 172 Blast hits to 170 proteins in 70 species: Archae - 0%3B Bacteria - 0%3B Metazoa - 110%3B Fungi - 0%3B Plants - 38%3B Viruses …	scaffold_2	2788225	2793620	5396	+	scaffold_2	2790397	2791019	623	*	0.572797563	-0.174568925	308.6765884	0.786571429	3.585641916	0.042151705	3.415	-0.723428571	0.757142857	0.252631579	0.174065934	0.168	0.891428571	-0.254413006	-1.535516499	0.429289451	-5.78532162	16	MODIFIER		NO	NO	NO	B	B	-0.438606738649048	0.429072440439202	0.205260387281633	-2.82534907122639	0.28196150640295814
AL2G22120	AT1G65430	OG0008781	ARI8	protein_coding	IBR domain-containing protein	ARIADNE 8	ARIADNE 8 (ARI8)%3B FUNCTIONS IN: ubiquitin-protein ligase activity%3B LOCATED IN: intracellular%3B EXPRESSED IN: 24 plant structures%3B EXPRESSED DURING: 15 growth stages%3B CONTAINS InterPro DOMAIN/s: Zinc finger%2C C6HC-type (InterPro:IPR002867)%2C Zinc finger%2C RING-type (InterPro:IPR001841)%2C Zinc finger%2C CCHC-type (InterPro:IPR001878)%2C Zinc finger%2C RanBP2-type (InterPro:IPR001876)%3…	.	ARIADNE 8 (ARI8)%3B FUNCTIONS IN: ubiquitin-protein ligase activity%3B LOCATED IN: intracellular%3B EXPRESSED IN: 24 plant structures%3B EXPRESSED DURING: 15 growth stages%3B CONTAINS InterPro DOMAIN/s: Zinc finger%2C C6HC-type (InterPro:IPR002867)%2C Zinc finger%2C RING-type (InterPro:IPR001841)%2C Zinc finger%2C CCHC-type (InterPro:IPR001878)%2C Zinc finger%2C RanBP2-type (InterPro:IPR001876)%3…	scaffold_2	9423657	9429430	5774	-	scaffold_2	9424791	9425670	880	*	0.785953102	-0.127533879	269.8438795	0.894857143	5.335402312	0.012212842	35.085	-0.824571429	0.892571429	0.176842105	0.017582418	0.124	0.948571429	-0.913890609	-3.247101671	0.262343553	-7.390198311	71	MODIFIER	NO	NO	NO	NO	A	B	0.0342730887744056	-2.45604351197165	-0.450726417432869	-0.231315128638418	0.7548413338264117
AL2G22120	AT1G65430	OG0008781	ARI8	protein_coding	IBR domain-containing protein	ARIADNE 8	ARIADNE 8 (ARI8)%3B FUNCTIONS IN: ubiquitin-protein ligase activity%3B LOCATED IN: intracellular%3B EXPRESSED IN: 24 plant structures%3B EXPRESSED DURING: 15 growth stages%3B CONTAINS InterPro DOMAIN/s: Zinc finger%2C C6HC-type (InterPro:IPR002867)%2C Zinc finger%2C RING-type (InterPro:IPR001841)%2C Zinc finger%2C CCHC-type (InterPro:IPR001878)%2C Zinc finger%2C RanBP2-type (InterPro:IPR001876)%3…	.	ARIADNE 8 (ARI8)%3B FUNCTIONS IN: ubiquitin-protein ligase activity%3B LOCATED IN: intracellular%3B EXPRESSED IN: 24 plant structures%3B EXPRESSED DURING: 15 growth stages%3B CONTAINS InterPro DOMAIN/s: Zinc finger%2C C6HC-type (InterPro:IPR002867)%2C Zinc finger%2C RING-type (InterPro:IPR001841)%2C Zinc finger%2C CCHC-type (InterPro:IPR001878)%2C Zinc finger%2C RanBP2-type (InterPro:IPR001876)%3…	scaffold_2	9423657	9429430	5774	-	scaffold_2	9424791	9425670	880	*	0.785953102	-0.127533879	269.8438795	0.894857143	5.335402312	0.012212842	35.085	-0.824571429	0.892571429	0.176842105	0.017582418	0.124	0.948571429	-0.913890609	-3.247101671	0.262343553	-7.390198311	73	MODIFIER	NO	NO	NO	NO	A	B	0.0342730887744056	-2.45604351197165	-0.450726417432869	-0.231315128638418	0.7548413338264117
AL2G25500	AT1G67120	OG0016716	.	protein_coding	midasin-like protein	.	ATPases%3Bnucleotide binding%3BATP binding%3Bnucleoside-triphosphatases%3Btranscription factor binding%3B FUNCTIONS IN: nucleoside-triphosphatase activity%2C ATPase activity%2C transcription factor binding%2C nucleotide binding%2C ATP binding%3B INVOLVED IN: regulation of transcription%2C D-dependent%2C regulation of protein complex assembly%3B LOCATED IN: chloroplast envelope%3B EXPRESSED IN: 23…	Represents a homolog of the yeast MDN gene%2C which encodes a non-ribosomal protein involved in the maturation and assembly of the 60S ribosomal subunit. In Arabidopsis%2C it is essential for female gametogenesis progression.	ATPases%3Bnucleotide binding%3BATP binding%3Bnucleoside-triphosphatases%3Btranscription factor binding%3B FUNCTIONS IN: nucleoside-triphosphatase activity%2C ATPase activity%2C transcription factor binding%2C nucleotide binding%2C ATP binding%3B INVOLVED IN: regulation of transcription%2C D-dependent%2C regulation of protein complex assembly%3B LOCATED IN: chloroplast envelope%3B EXPRESSED IN: 23…	scaffold_2	12161938	12188455	26518	-	scaffold_2	12185148	12185770	623	*	0.688246154	-0.033300579	294.6708644	0.829714286	3.787848544	0.015592651	10.4651	-0.589714286	0.817714286	0.096	0.241318681	0.156	0.745714286	-1.617333385	-0.7999195	-0.386360506	-4.13514599	49	MODIFIER	MODERATE	NO	0.2	0.0714285714285714	C	B	-1.63782998099492	-0.843623700255217	-0.247582116618054	-5.27894168571246	-0.9172617359429138
AL2G28690	AT3G04220	OG0000726	.	protein_coding	Disease resistance protein (TIR-NBS-LRR class) family	.	Disease resistance protein (TIR-NBS-LRR class) family%3B FUNCTIONS IN: transmembrane receptor activity%2C nucleoside-triphosphatase activity%2C nucleotide binding%2C ATP binding%3B INVOLVED IN: signal transduction%2C defense response%2C apoptosis%2C innate immune response%3B LOCATED IN: intrinsic to membrane%3B EXPRESSED IN: 21 plant structures%3B EXPRESSED DURING: 13 growth stages%3B CONTAINS In…	.	Disease resistance protein (TIR-NBS-LRR class) family%3B FUNCTIONS IN: transmembrane receptor activity%2C nucleoside-triphosphatase activity%2C nucleotide binding%2C ATP binding%3B INVOLVED IN: signal transduction%2C defense response%2C apoptosis%2C innate immune response%3B LOCATED IN: intrinsic to membrane%3B EXPRESSED IN: 21 plant structures%3B EXPRESSED DURING: 13 growth stages%3B CONTAINS In…	scaffold_2	13828335	13831656	3322	-	scaffold_2	13830195	13830512	318	*	0.913500621	-0.030288259	216.5317031	0.930285714	5.672006896	0.012212842	1.5368	0.661714286	0.930285714	0.008	0.04967033	0.796	0.134285714	-2.383060157	-2.896130554	-4.70071949	-0.698897914	48	MODIFIER	MODERATE	NO	1	0	A	B	-2.46064088071173	-2.03012129755599	-0.723701571652774	-0.057828782159605	-1.7400726356597238
AL2G28690	AT3G04220	OG0000726	.	protein_coding	Disease resistance protein (TIR-NBS-LRR class) family	.	Disease resistance protein (TIR-NBS-LRR class) family%3B FUNCTIONS IN: transmembrane receptor activity%2C nucleoside-triphosphatase activity%2C nucleotide binding%2C ATP binding%3B INVOLVED IN: signal transduction%2C defense response%2C apoptosis%2C innate immune response%3B LOCATED IN: intrinsic to membrane%3B EXPRESSED IN: 21 plant structures%3B EXPRESSED DURING: 13 growth stages%3B CONTAINS In…	.	Disease resistance protein (TIR-NBS-LRR class) family%3B FUNCTIONS IN: transmembrane receptor activity%2C nucleoside-triphosphatase activity%2C nucleotide binding%2C ATP binding%3B INVOLVED IN: signal transduction%2C defense response%2C apoptosis%2C innate immune response%3B LOCATED IN: intrinsic to membrane%3B EXPRESSED IN: 21 plant structures%3B EXPRESSED DURING: 13 growth stages%3B CONTAINS In…	scaffold_2	13828335	13831656	3322	-	scaffold_2	13830195	13830512	318	*	0.913500621	-0.030288259	216.5317031	0.930285714	5.672006896	0.012212842	1.5368	0.661714286	0.930285714	0.008	0.04967033	0.796	0.134285714	-2.383060157	-2.896130554	-4.70071949	-0.698897914	48	MODIFIER	MODERATE	NO	1	0	A	B	-2.46064088071173	-2.03012129755599	-0.723701571652774	-0.057828782159605	-1.7400726356597238
AL2G28690	AT3G04220	OG0000726	.	protein_coding	Disease resistance protein (TIR-NBS-LRR class) family	.	Disease resistance protein (TIR-NBS-LRR class) family%3B FUNCTIONS IN: transmembrane receptor activity%2C nucleoside-triphosphatase activity%2C nucleotide binding%2C ATP binding%3B INVOLVED IN: signal transduction%2C defense response%2C apoptosis%2C innate immune response%3B LOCATED IN: intrinsic to membrane%3B EXPRESSED IN: 21 plant structures%3B EXPRESSED DURING: 13 growth stages%3B CONTAINS In…	.	Disease resistance protein (TIR-NBS-LRR class) family%3B FUNCTIONS IN: transmembrane receptor activity%2C nucleoside-triphosphatase activity%2C nucleotide binding%2C ATP binding%3B INVOLVED IN: signal transduction%2C defense response%2C apoptosis%2C innate immune response%3B LOCATED IN: intrinsic to membrane%3B EXPRESSED IN: 21 plant structures%3B EXPRESSED DURING: 13 growth stages%3B CONTAINS In…	scaffold_2	13828335	13831656	3322	-	scaffold_2	13830195	13830512	318	*	0.913500621	-0.030288259	216.5317031	0.930285714	5.672006896	0.012212842	1.5368	0.661714286	0.930285714	0.008	0.04967033	0.796	0.134285714	-2.383060157	-2.896130554	-4.70071949	-0.698897914	51	MODIFIER	MODERATE	NO	1	0	A	B	-2.46064088071173	-2.03012129755599	-0.723701571652774	-0.057828782159605	-1.7400726356597238
AL2G28690	AT3G04220	OG0000726	.	protein_coding	Disease resistance protein (TIR-NBS-LRR class) family	.	Disease resistance protein (TIR-NBS-LRR class) family%3B FUNCTIONS IN: transmembrane receptor activity%2C nucleoside-triphosphatase activity%2C nucleotide binding%2C ATP binding%3B INVOLVED IN: signal transduction%2C defense response%2C apoptosis%2C innate immune response%3B LOCATED IN: intrinsic to membrane%3B EXPRESSED IN: 21 plant structures%3B EXPRESSED DURING: 13 growth stages%3B CONTAINS In…	.	Disease resistance protein (TIR-NBS-LRR class) family%3B FUNCTIONS IN: transmembrane receptor activity%2C nucleoside-triphosphatase activity%2C nucleotide binding%2C ATP binding%3B INVOLVED IN: signal transduction%2C defense response%2C apoptosis%2C innate immune response%3B LOCATED IN: intrinsic to membrane%3B EXPRESSED IN: 21 plant structures%3B EXPRESSED DURING: 13 growth stages%3B CONTAINS In…	scaffold_2	13828335	13831656	3322	-	scaffold_2	13828402	13828770	369	*	0.965529954	-0.030433127	253.0713206	0.968571429	6.046728152	0.012212842	0	0.951428571	0.968571429	0	0.014505495	0.96	0.008571429	-2.452671681	-3.280756436	-5.723859348	0.038827662	22	MODIFIER	MODERATE	HIGH	1	0	A	B	-2.46064088071173	-2.7906966804411	-0.723701571652774	-0.214792619449961	-1.7400726356597238
AL2G28690	AT3G04220	OG0000726	.	protein_coding	Disease resistance protein (TIR-NBS-LRR class) family	.	Disease resistance protein (TIR-NBS-LRR class) family%3B FUNCTIONS IN: transmembrane receptor activity%2C nucleoside-triphosphatase activity%2C nucleotide binding%2C ATP binding%3B INVOLVED IN: signal transduction%2C defense response%2C apoptosis%2C innate immune response%3B LOCATED IN: intrinsic to membrane%3B EXPRESSED IN: 21 plant structures%3B EXPRESSED DURING: 13 growth stages%3B CONTAINS In…	.	Disease resistance protein (TIR-NBS-LRR class) family%3B FUNCTIONS IN: transmembrane receptor activity%2C nucleoside-triphosphatase activity%2C nucleotide binding%2C ATP binding%3B INVOLVED IN: signal transduction%2C defense response%2C apoptosis%2C innate immune response%3B LOCATED IN: intrinsic to membrane%3B EXPRESSED IN: 21 plant structures%3B EXPRESSED DURING: 13 growth stages%3B CONTAINS In…	scaffold_2	13828335	13831656	3322	-	scaffold_2	13830195	13830512	318	*	0.913500621	-0.030288259	216.5317031	0.930285714	5.672006896	0.012212842	1.5368	0.661714286	0.930285714	0.008	0.04967033	0.796	0.134285714	-2.383060157	-2.896130554	-4.70071949	-0.698897914	51	MODIFIER	MODERATE	NO	1	0	A	B	-2.46064088071173	-2.03012129755599	-0.723701571652774	-0.057828782159605	-1.7400726356597238
AL2G28690	AT3G04220	OG0000726	.	protein_coding	Disease resistance protein (TIR-NBS-LRR class) family	.	Disease resistance protein (TIR-NBS-LRR class) family%3B FUNCTIONS IN: transmembrane receptor activity%2C nucleoside-triphosphatase activity%2C nucleotide binding%2C ATP binding%3B INVOLVED IN: signal transduction%2C defense response%2C apoptosis%2C innate immune response%3B LOCATED IN: intrinsic to membrane%3B EXPRESSED IN: 21 plant structures%3B EXPRESSED DURING: 13 growth stages%3B CONTAINS In…	.	Disease resistance protein (TIR-NBS-LRR class) family%3B FUNCTIONS IN: transmembrane receptor activity%2C nucleoside-triphosphatase activity%2C nucleotide binding%2C ATP binding%3B INVOLVED IN: signal transduction%2C defense response%2C apoptosis%2C innate immune response%3B LOCATED IN: intrinsic to membrane%3B EXPRESSED IN: 21 plant structures%3B EXPRESSED DURING: 13 growth stages%3B CONTAINS In…	scaffold_2	13828335	13831656	3322	-	scaffold_2	13827872	13828399	528	*	1	-0.024118791	251.4477026	1	6.279705116	0.012212842	0	0.6	1	0	0	0.8	0.2	-2.452671681	-3.439414612	-4.76988279	-1.58546286	1	MODIFIER	NO	NO	1	0	A	B	-2.46064088071173	-3.62732960161472	-0.723701571652774	0	-1.7400726356597238
AL2G28690	AT3G04220	OG0000726	.	protein_coding	Disease resistance protein (TIR-NBS-LRR class) family	.	Disease resistance protein (TIR-NBS-LRR class) family%3B FUNCTIONS IN: transmembrane receptor activity%2C nucleoside-triphosphatase activity%2C nucleotide binding%2C ATP binding%3B INVOLVED IN: signal transduction%2C defense response%2C apoptosis%2C innate immune response%3B LOCATED IN: intrinsic to membrane%3B EXPRESSED IN: 21 plant structures%3B EXPRESSED DURING: 13 growth stages%3B CONTAINS In…	.	Disease resistance protein (TIR-NBS-LRR class) family%3B FUNCTIONS IN: transmembrane receptor activity%2C nucleoside-triphosphatase activity%2C nucleotide binding%2C ATP binding%3B INVOLVED IN: signal transduction%2C defense response%2C apoptosis%2C innate immune response%3B LOCATED IN: intrinsic to membrane%3B EXPRESSED IN: 21 plant structures%3B EXPRESSED DURING: 13 growth stages%3B CONTAINS In…	scaffold_2	13828335	13831656	3322	-	scaffold_2	13830195	13830512	318	*	0.913500621	-0.030288259	216.5317031	0.930285714	5.672006896	0.012212842	1.5368	0.661714286	0.930285714	0.008	0.04967033	0.796	0.134285714	-2.383060157	-2.896130554	-4.70071949	-0.698897914	48	MODIFIER	MODERATE	NO	1	0	A	B	-2.46064088071173	-2.03012129755599	-0.723701571652774	-0.057828782159605	-1.7400726356597238
AL2G28690	AT3G04220	OG0000726	.	protein_coding	Disease resistance protein (TIR-NBS-LRR class) family	.	Disease resistance protein (TIR-NBS-LRR class) family%3B FUNCTIONS IN: transmembrane receptor activity%2C nucleoside-triphosphatase activity%2C nucleotide binding%2C ATP binding%3B INVOLVED IN: signal transduction%2C defense response%2C apoptosis%2C innate immune response%3B LOCATED IN: intrinsic to membrane%3B EXPRESSED IN: 21 plant structures%3B EXPRESSED DURING: 13 growth stages%3B CONTAINS In…	.	Disease resistance protein (TIR-NBS-LRR class) family%3B FUNCTIONS IN: transmembrane receptor activity%2C nucleoside-triphosphatase activity%2C nucleotide binding%2C ATP binding%3B INVOLVED IN: signal transduction%2C defense response%2C apoptosis%2C innate immune response%3B LOCATED IN: intrinsic to membrane%3B EXPRESSED IN: 21 plant structures%3B EXPRESSED DURING: 13 growth stages%3B CONTAINS In…	scaffold_2	13828335	13831656	3322	-	scaffold_2	13828402	13828770	369	*	0.965529954	-0.030433127	253.0713206	0.968571429	6.046728152	0.012212842	0	0.951428571	0.968571429	0	0.014505495	0.96	0.008571429	-2.452671681	-3.280756436	-5.723859348	0.038827662	22	MODIFIER	MODERATE	HIGH	1	0	A	B	-2.46064088071173	-2.7906966804411	-0.723701571652774	-0.214792619449961	-1.7400726356597238
AL2G28690	AT3G04220	OG0000726	.	protein_coding	Disease resistance protein (TIR-NBS-LRR class) family	.	Disease resistance protein (TIR-NBS-LRR class) family%3B FUNCTIONS IN: transmembrane receptor activity%2C nucleoside-triphosphatase activity%2C nucleotide binding%2C ATP binding%3B INVOLVED IN: signal transduction%2C defense response%2C apoptosis%2C innate immune response%3B LOCATED IN: intrinsic to membrane%3B EXPRESSED IN: 21 plant structures%3B EXPRESSED DURING: 13 growth stages%3B CONTAINS In…	.	Disease resistance protein (TIR-NBS-LRR class) family%3B FUNCTIONS IN: transmembrane receptor activity%2C nucleoside-triphosphatase activity%2C nucleotide binding%2C ATP binding%3B INVOLVED IN: signal transduction%2C defense response%2C apoptosis%2C innate immune response%3B LOCATED IN: intrinsic to membrane%3B EXPRESSED IN: 21 plant structures%3B EXPRESSED DURING: 13 growth stages%3B CONTAINS In…	scaffold_2	13828335	13831656	3322	-	scaffold_2	13828402	13828770	369	*	0.965529954	-0.030433127	253.0713206	0.968571429	6.046728152	0.012212842	0	0.951428571	0.968571429	0	0.014505495	0.96	0.008571429	-2.452671681	-3.280756436	-5.723859348	0.038827662	22	MODIFIER	MODERATE	HIGH	1	0	A	B	-2.46064088071173	-2.7906966804411	-0.723701571652774	-0.214792619449961	-1.7400726356597238
AL2G28690	AT3G04220	OG0000726	.	protein_coding	Disease resistance protein (TIR-NBS-LRR class) family	.	Disease resistance protein (TIR-NBS-LRR class) family%3B FUNCTIONS IN: transmembrane receptor activity%2C nucleoside-triphosphatase activity%2C nucleotide binding%2C ATP binding%3B INVOLVED IN: signal transduction%2C defense response%2C apoptosis%2C innate immune response%3B LOCATED IN: intrinsic to membrane%3B EXPRESSED IN: 21 plant structures%3B EXPRESSED DURING: 13 growth stages%3B CONTAINS In…	.	Disease resistance protein (TIR-NBS-LRR class) family%3B FUNCTIONS IN: transmembrane receptor activity%2C nucleoside-triphosphatase activity%2C nucleotide binding%2C ATP binding%3B INVOLVED IN: signal transduction%2C defense response%2C apoptosis%2C innate immune response%3B LOCATED IN: intrinsic to membrane%3B EXPRESSED IN: 21 plant structures%3B EXPRESSED DURING: 13 growth stages%3B CONTAINS In…	scaffold_2	13828335	13831656	3322	-	scaffold_2	13828402	13828770	369	*	0.965529954	-0.030433127	253.0713206	0.968571429	6.046728152	0.012212842	0	0.951428571	0.968571429	0	0.014505495	0.96	0.008571429	-2.452671681	-3.280756436	-5.723859348	0.038827662	21	MODIFIER	MODERATE	HIGH	1	0	A	B	-2.46064088071173	-2.7906966804411	-0.723701571652774	-0.214792619449961	-1.7400726356597238
AL2G28690	AT3G04220	OG0000726	.	protein_coding	Disease resistance protein (TIR-NBS-LRR class) family	.	Disease resistance protein (TIR-NBS-LRR class) family%3B FUNCTIONS IN: transmembrane receptor activity%2C nucleoside-triphosphatase activity%2C nucleotide binding%2C ATP binding%3B INVOLVED IN: signal transduction%2C defense response%2C apoptosis%2C innate immune response%3B LOCATED IN: intrinsic to membrane%3B EXPRESSED IN: 21 plant structures%3B EXPRESSED DURING: 13 growth stages%3B CONTAINS In…	.	Disease resistance protein (TIR-NBS-LRR class) family%3B FUNCTIONS IN: transmembrane receptor activity%2C nucleoside-triphosphatase activity%2C nucleotide binding%2C ATP binding%3B INVOLVED IN: signal transduction%2C defense response%2C apoptosis%2C innate immune response%3B LOCATED IN: intrinsic to membrane%3B EXPRESSED IN: 21 plant structures%3B EXPRESSED DURING: 13 growth stages%3B CONTAINS In…	scaffold_2	13828335	13831656	3322	-	scaffold_2	13828402	13828770	369	*	0.965529954	-0.030433127	253.0713206	0.968571429	6.046728152	0.012212842	0	0.951428571	0.968571429	0	0.014505495	0.96	0.008571429	-2.452671681	-3.280756436	-5.723859348	0.038827662	21	MODIFIER	MODERATE	HIGH	1	0	A	B	-2.46064088071173	-2.7906966804411	-0.723701571652774	-0.214792619449961	-1.7400726356597238
AL2G28690	AT3G04220	OG0000726	.	protein_coding	Disease resistance protein (TIR-NBS-LRR class) family	.	Disease resistance protein (TIR-NBS-LRR class) family%3B FUNCTIONS IN: transmembrane receptor activity%2C nucleoside-triphosphatase activity%2C nucleotide binding%2C ATP binding%3B INVOLVED IN: signal transduction%2C defense response%2C apoptosis%2C innate immune response%3B LOCATED IN: intrinsic to membrane%3B EXPRESSED IN: 21 plant structures%3B EXPRESSED DURING: 13 growth stages%3B CONTAINS In…	.	Disease resistance protein (TIR-NBS-LRR class) family%3B FUNCTIONS IN: transmembrane receptor activity%2C nucleoside-triphosphatase activity%2C nucleotide binding%2C ATP binding%3B INVOLVED IN: signal transduction%2C defense response%2C apoptosis%2C innate immune response%3B LOCATED IN: intrinsic to membrane%3B EXPRESSED IN: 21 plant structures%3B EXPRESSED DURING: 13 growth stages%3B CONTAINS In…	scaffold_2	13828335	13831656	3322	-	scaffold_2	13827872	13828399	528	*	1	-0.024118791	251.4477026	1	6.279705116	0.012212842	0	0.6	1	0	0	0.8	0.2	-2.452671681	-3.439414612	-4.76988279	-1.58546286	1	MODIFIER	NO	NO	1	0	A	B	-2.46064088071173	-3.62732960161472	-0.723701571652774	0	-1.7400726356597238
AL2G28690	AT3G04220	OG0000726	.	protein_coding	Disease resistance protein (TIR-NBS-LRR class) family	.	Disease resistance protein (TIR-NBS-LRR class) family%3B FUNCTIONS IN: transmembrane receptor activity%2C nucleoside-triphosphatase activity%2C nucleotide binding%2C ATP binding%3B INVOLVED IN: signal transduction%2C defense response%2C apoptosis%2C innate immune response%3B LOCATED IN: intrinsic to membrane%3B EXPRESSED IN: 21 plant structures%3B EXPRESSED DURING: 13 growth stages%3B CONTAINS In…	.	Disease resistance protein (TIR-NBS-LRR class) family%3B FUNCTIONS IN: transmembrane receptor activity%2C nucleoside-triphosphatase activity%2C nucleotide binding%2C ATP binding%3B INVOLVED IN: signal transduction%2C defense response%2C apoptosis%2C innate immune response%3B LOCATED IN: intrinsic to membrane%3B EXPRESSED IN: 21 plant structures%3B EXPRESSED DURING: 13 growth stages%3B CONTAINS In…	scaffold_2	13828335	13831656	3322	-	scaffold_2	13827872	13828399	528	*	1	-0.024118791	251.4477026	1	6.279705116	0.012212842	0	0.6	1	0	0	0.8	0.2	-2.452671681	-3.439414612	-4.76988279	-1.58546286	1	MODIFIER	NO	NO	1	0	A	B	-2.46064088071173	-3.62732960161472	-0.723701571652774	0	-1.7400726356597238
AL2G28690	AT3G04220	OG0000726	.	protein_coding	Disease resistance protein (TIR-NBS-LRR class) family	.	Disease resistance protein (TIR-NBS-LRR class) family%3B FUNCTIONS IN: transmembrane receptor activity%2C nucleoside-triphosphatase activity%2C nucleotide binding%2C ATP binding%3B INVOLVED IN: signal transduction%2C defense response%2C apoptosis%2C innate immune response%3B LOCATED IN: intrinsic to membrane%3B EXPRESSED IN: 21 plant structures%3B EXPRESSED DURING: 13 growth stages%3B CONTAINS In…	.	Disease resistance protein (TIR-NBS-LRR class) family%3B FUNCTIONS IN: transmembrane receptor activity%2C nucleoside-triphosphatase activity%2C nucleotide binding%2C ATP binding%3B INVOLVED IN: signal transduction%2C defense response%2C apoptosis%2C innate immune response%3B LOCATED IN: intrinsic to membrane%3B EXPRESSED IN: 21 plant structures%3B EXPRESSED DURING: 13 growth stages%3B CONTAINS In…	scaffold_2	13828335	13831656	3322	-	scaffold_2	13828402	13828770	369	*	0.965529954	-0.030433127	253.0713206	0.968571429	6.046728152	0.012212842	0	0.951428571	0.968571429	0	0.014505495	0.96	0.008571429	-2.452671681	-3.280756436	-5.723859348	0.038827662	21	MODIFIER	MODERATE	HIGH	1	0	A	B	-2.46064088071173	-2.7906966804411	-0.723701571652774	-0.214792619449961	-1.7400726356597238
AL2G28690	AT3G04220	OG0000726	.	protein_coding	Disease resistance protein (TIR-NBS-LRR class) family	.	Disease resistance protein (TIR-NBS-LRR class) family%3B FUNCTIONS IN: transmembrane receptor activity%2C nucleoside-triphosphatase activity%2C nucleotide binding%2C ATP binding%3B INVOLVED IN: signal transduction%2C defense response%2C apoptosis%2C innate immune response%3B LOCATED IN: intrinsic to membrane%3B EXPRESSED IN: 21 plant structures%3B EXPRESSED DURING: 13 growth stages%3B CONTAINS In…	.	Disease resistance protein (TIR-NBS-LRR class) family%3B FUNCTIONS IN: transmembrane receptor activity%2C nucleoside-triphosphatase activity%2C nucleotide binding%2C ATP binding%3B INVOLVED IN: signal transduction%2C defense response%2C apoptosis%2C innate immune response%3B LOCATED IN: intrinsic to membrane%3B EXPRESSED IN: 21 plant structures%3B EXPRESSED DURING: 13 growth stages%3B CONTAINS In…	scaffold_2	13828335	13831656	3322	-	scaffold_2	13828402	13828770	369	*	0.965529954	-0.030433127	253.0713206	0.968571429	6.046728152	0.012212842	0	0.951428571	0.968571429	0	0.014505495	0.96	0.008571429	-2.452671681	-3.280756436	-5.723859348	0.038827662	22	MODIFIER	MODERATE	HIGH	1	0	A	B	-2.46064088071173	-2.7906966804411	-0.723701571652774	-0.214792619449961	-1.7400726356597238
AL2G28690	AT3G04220	OG0000726	.	protein_coding	Disease resistance protein (TIR-NBS-LRR class) family	.	Disease resistance protein (TIR-NBS-LRR class) family%3B FUNCTIONS IN: transmembrane receptor activity%2C nucleoside-triphosphatase activity%2C nucleotide binding%2C ATP binding%3B INVOLVED IN: signal transduction%2C defense response%2C apoptosis%2C innate immune response%3B LOCATED IN: intrinsic to membrane%3B EXPRESSED IN: 21 plant structures%3B EXPRESSED DURING: 13 growth stages%3B CONTAINS In…	.	Disease resistance protein (TIR-NBS-LRR class) family%3B FUNCTIONS IN: transmembrane receptor activity%2C nucleoside-triphosphatase activity%2C nucleotide binding%2C ATP binding%3B INVOLVED IN: signal transduction%2C defense response%2C apoptosis%2C innate immune response%3B LOCATED IN: intrinsic to membrane%3B EXPRESSED IN: 21 plant structures%3B EXPRESSED DURING: 13 growth stages%3B CONTAINS In…	scaffold_2	13828335	13831656	3322	-	scaffold_2	13830195	13830512	318	*	0.913500621	-0.030288259	216.5317031	0.930285714	5.672006896	0.012212842	1.5368	0.661714286	0.930285714	0.008	0.04967033	0.796	0.134285714	-2.383060157	-2.896130554	-4.70071949	-0.698897914	51	MODIFIER	MODERATE	NO	1	0	A	B	-2.46064088071173	-2.03012129755599	-0.723701571652774	-0.057828782159605	-1.7400726356597238
AL2G28690	AT3G04220	OG0000726	.	protein_coding	Disease resistance protein (TIR-NBS-LRR class) family	.	Disease resistance protein (TIR-NBS-LRR class) family%3B FUNCTIONS IN: transmembrane receptor activity%2C nucleoside-triphosphatase activity%2C nucleotide binding%2C ATP binding%3B INVOLVED IN: signal transduction%2C defense response%2C apoptosis%2C innate immune response%3B LOCATED IN: intrinsic to membrane%3B EXPRESSED IN: 21 plant structures%3B EXPRESSED DURING: 13 growth stages%3B CONTAINS In…	.	Disease resistance protein (TIR-NBS-LRR class) family%3B FUNCTIONS IN: transmembrane receptor activity%2C nucleoside-triphosphatase activity%2C nucleotide binding%2C ATP binding%3B INVOLVED IN: signal transduction%2C defense response%2C apoptosis%2C innate immune response%3B LOCATED IN: intrinsic to membrane%3B EXPRESSED IN: 21 plant structures%3B EXPRESSED DURING: 13 growth stages%3B CONTAINS In…	scaffold_2	13828335	13831656	3322	-	scaffold_2	13828402	13828770	369	*	0.965529954	-0.030433127	253.0713206	0.968571429	6.046728152	0.012212842	0	0.951428571	0.968571429	0	0.014505495	0.96	0.008571429	-2.452671681	-3.280756436	-5.723859348	0.038827662	21	MODIFIER	MODERATE	HIGH	1	0	A	B	-2.46064088071173	-2.7906966804411	-0.723701571652774	-0.214792619449961	-1.7400726356597238
AL2G28690	AT3G04220	OG0000726	.	protein_coding	Disease resistance protein (TIR-NBS-LRR class) family	.	Disease resistance protein (TIR-NBS-LRR class) family%3B FUNCTIONS IN: transmembrane receptor activity%2C nucleoside-triphosphatase activity%2C nucleotide binding%2C ATP binding%3B INVOLVED IN: signal transduction%2C defense response%2C apoptosis%2C innate immune response%3B LOCATED IN: intrinsic to membrane%3B EXPRESSED IN: 21 plant structures%3B EXPRESSED DURING: 13 growth stages%3B CONTAINS In…	.	Disease resistance protein (TIR-NBS-LRR class) family%3B FUNCTIONS IN: transmembrane receptor activity%2C nucleoside-triphosphatase activity%2C nucleotide binding%2C ATP binding%3B INVOLVED IN: signal transduction%2C defense response%2C apoptosis%2C innate immune response%3B LOCATED IN: intrinsic to membrane%3B EXPRESSED IN: 21 plant structures%3B EXPRESSED DURING: 13 growth stages%3B CONTAINS In…	scaffold_2	13828335	13831656	3322	-	scaffold_2	13830195	13830512	318	*	0.913500621	-0.030288259	216.5317031	0.930285714	5.672006896	0.012212842	1.5368	0.661714286	0.930285714	0.008	0.04967033	0.796	0.134285714	-2.383060157	-2.896130554	-4.70071949	-0.698897914	48	MODIFIER	MODERATE	NO	1	0	A	B	-2.46064088071173	-2.03012129755599	-0.723701571652774	-0.057828782159605	-1.7400726356597238
AL2G28690	AT3G04220	OG0000726	.	protein_coding	Disease resistance protein (TIR-NBS-LRR class) family	.	Disease resistance protein (TIR-NBS-LRR class) family%3B FUNCTIONS IN: transmembrane receptor activity%2C nucleoside-triphosphatase activity%2C nucleotide binding%2C ATP binding%3B INVOLVED IN: signal transduction%2C defense response%2C apoptosis%2C innate immune response%3B LOCATED IN: intrinsic to membrane%3B EXPRESSED IN: 21 plant structures%3B EXPRESSED DURING: 13 growth stages%3B CONTAINS In…	.	Disease resistance protein (TIR-NBS-LRR class) family%3B FUNCTIONS IN: transmembrane receptor activity%2C nucleoside-triphosphatase activity%2C nucleotide binding%2C ATP binding%3B INVOLVED IN: signal transduction%2C defense response%2C apoptosis%2C innate immune response%3B LOCATED IN: intrinsic to membrane%3B EXPRESSED IN: 21 plant structures%3B EXPRESSED DURING: 13 growth stages%3B CONTAINS In…	scaffold_2	13828335	13831656	3322	-	scaffold_2	13830195	13830512	318	*	0.913500621	-0.030288259	216.5317031	0.930285714	5.672006896	0.012212842	1.5368	0.661714286	0.930285714	0.008	0.04967033	0.796	0.134285714	-2.383060157	-2.896130554	-4.70071949	-0.698897914	51	MODIFIER	MODERATE	NO	1	0	A	B	-2.46064088071173	-2.03012129755599	-0.723701571652774	-0.057828782159605	-1.7400726356597238
AL2G28690	AT3G04220	OG0000726	.	protein_coding	Disease resistance protein (TIR-NBS-LRR class) family	.	Disease resistance protein (TIR-NBS-LRR class) family%3B FUNCTIONS IN: transmembrane receptor activity%2C nucleoside-triphosphatase activity%2C nucleotide binding%2C ATP binding%3B INVOLVED IN: signal transduction%2C defense response%2C apoptosis%2C innate immune response%3B LOCATED IN: intrinsic to membrane%3B EXPRESSED IN: 21 plant structures%3B EXPRESSED DURING: 13 growth stages%3B CONTAINS In…	.	Disease resistance protein (TIR-NBS-LRR class) family%3B FUNCTIONS IN: transmembrane receptor activity%2C nucleoside-triphosphatase activity%2C nucleotide binding%2C ATP binding%3B INVOLVED IN: signal transduction%2C defense response%2C apoptosis%2C innate immune response%3B LOCATED IN: intrinsic to membrane%3B EXPRESSED IN: 21 plant structures%3B EXPRESSED DURING: 13 growth stages%3B CONTAINS In…	scaffold_2	13828335	13831656	3322	-	scaffold_2	13827872	13828399	528	*	1	-0.024118791	251.4477026	1	6.279705116	0.012212842	0	0.6	1	0	0	0.8	0.2	-2.452671681	-3.439414612	-4.76988279	-1.58546286	1	MODIFIER	NO	NO	1	0	A	B	-2.46064088071173	-3.62732960161472	-0.723701571652774	0	-1.7400726356597238
AL2G28690	AT1G69550	OG0000726	.	protein_coding	disease resistance protein (TIR-NBS-LRR class)	.	disease resistance protein (TIR-NBS-LRR class)%3B FUNCTIONS IN: transmembrane receptor activity%2C nucleoside-triphosphatase activity%2C nucleotide binding%2C ATP binding%3B INVOLVED IN: signal transduction%2C defense response%2C apoptosis%2C innate immune response%3B LOCATED IN: intrinsic to membrane%2C endomembrane system%3B EXPRESSED IN: 21 plant structures%3B EXPRESSED DURING: 13 growth stage…	.	disease resistance protein (TIR-NBS-LRR class)%3B FUNCTIONS IN: transmembrane receptor activity%2C nucleoside-triphosphatase activity%2C nucleotide binding%2C ATP binding%3B INVOLVED IN: signal transduction%2C defense response%2C apoptosis%2C innate immune response%3B LOCATED IN: intrinsic to membrane%2C endomembrane system%3B EXPRESSED IN: 21 plant structures%3B EXPRESSED DURING: 13 growth stage…	scaffold_2	13828335	13831656	3322	-	scaffold_2	13830195	13830512	318	*	0.913500621	-0.030288259	216.5317031	0.930285714	5.672006896	0.012212842	1.5368	0.661714286	0.930285714	0.008	0.04967033	0.796	0.134285714	-2.383060157	-2.896130554	-4.70071949	-0.698897914	48	MODIFIER	MODERATE	NO	1	0	A	B	-2.46064088071173	-2.03012129755599	-0.723701571652774	-0.057828782159605	-1.7400726356597238
AL2G28690	AT1G69550	OG0000726	.	protein_coding	disease resistance protein (TIR-NBS-LRR class)	.	disease resistance protein (TIR-NBS-LRR class)%3B FUNCTIONS IN: transmembrane receptor activity%2C nucleoside-triphosphatase activity%2C nucleotide binding%2C ATP binding%3B INVOLVED IN: signal transduction%2C defense response%2C apoptosis%2C innate immune response%3B LOCATED IN: intrinsic to membrane%2C endomembrane system%3B EXPRESSED IN: 21 plant structures%3B EXPRESSED DURING: 13 growth stage…	.	disease resistance protein (TIR-NBS-LRR class)%3B FUNCTIONS IN: transmembrane receptor activity%2C nucleoside-triphosphatase activity%2C nucleotide binding%2C ATP binding%3B INVOLVED IN: signal transduction%2C defense response%2C apoptosis%2C innate immune response%3B LOCATED IN: intrinsic to membrane%2C endomembrane system%3B EXPRESSED IN: 21 plant structures%3B EXPRESSED DURING: 13 growth stage…	scaffold_2	13828335	13831656	3322	-	scaffold_2	13830195	13830512	318	*	0.913500621	-0.030288259	216.5317031	0.930285714	5.672006896	0.012212842	1.5368	0.661714286	0.930285714	0.008	0.04967033	0.796	0.134285714	-2.383060157	-2.896130554	-4.70071949	-0.698897914	48	MODIFIER	MODERATE	NO	1	0	A	B	-2.46064088071173	-2.03012129755599	-0.723701571652774	-0.057828782159605	-1.7400726356597238
AL2G28690	AT1G69550	OG0000726	.	protein_coding	disease resistance protein (TIR-NBS-LRR class)	.	disease resistance protein (TIR-NBS-LRR class)%3B FUNCTIONS IN: transmembrane receptor activity%2C nucleoside-triphosphatase activity%2C nucleotide binding%2C ATP binding%3B INVOLVED IN: signal transduction%2C defense response%2C apoptosis%2C innate immune response%3B LOCATED IN: intrinsic to membrane%2C endomembrane system%3B EXPRESSED IN: 21 plant structures%3B EXPRESSED DURING: 13 growth stage…	.	disease resistance protein (TIR-NBS-LRR class)%3B FUNCTIONS IN: transmembrane receptor activity%2C nucleoside-triphosphatase activity%2C nucleotide binding%2C ATP binding%3B INVOLVED IN: signal transduction%2C defense response%2C apoptosis%2C innate immune response%3B LOCATED IN: intrinsic to membrane%2C endomembrane system%3B EXPRESSED IN: 21 plant structures%3B EXPRESSED DURING: 13 growth stage…	scaffold_2	13828335	13831656	3322	-	scaffold_2	13830195	13830512	318	*	0.913500621	-0.030288259	216.5317031	0.930285714	5.672006896	0.012212842	1.5368	0.661714286	0.930285714	0.008	0.04967033	0.796	0.134285714	-2.383060157	-2.896130554	-4.70071949	-0.698897914	51	MODIFIER	MODERATE	NO	1	0	A	B	-2.46064088071173	-2.03012129755599	-0.723701571652774	-0.057828782159605	-1.7400726356597238
AL2G28690	AT1G69550	OG0000726	.	protein_coding	disease resistance protein (TIR-NBS-LRR class)	.	disease resistance protein (TIR-NBS-LRR class)%3B FUNCTIONS IN: transmembrane receptor activity%2C nucleoside-triphosphatase activity%2C nucleotide binding%2C ATP binding%3B INVOLVED IN: signal transduction%2C defense response%2C apoptosis%2C innate immune response%3B LOCATED IN: intrinsic to membrane%2C endomembrane system%3B EXPRESSED IN: 21 plant structures%3B EXPRESSED DURING: 13 growth stage…	.	disease resistance protein (TIR-NBS-LRR class)%3B FUNCTIONS IN: transmembrane receptor activity%2C nucleoside-triphosphatase activity%2C nucleotide binding%2C ATP binding%3B INVOLVED IN: signal transduction%2C defense response%2C apoptosis%2C innate immune response%3B LOCATED IN: intrinsic to membrane%2C endomembrane system%3B EXPRESSED IN: 21 plant structures%3B EXPRESSED DURING: 13 growth stage…	scaffold_2	13828335	13831656	3322	-	scaffold_2	13828402	13828770	369	*	0.965529954	-0.030433127	253.0713206	0.968571429	6.046728152	0.012212842	0	0.951428571	0.968571429	0	0.014505495	0.96	0.008571429	-2.452671681	-3.280756436	-5.723859348	0.038827662	22	MODIFIER	MODERATE	HIGH	1	0	A	B	-2.46064088071173	-2.7906966804411	-0.723701571652774	-0.214792619449961	-1.7400726356597238
AL2G28690	AT1G69550	OG0000726	.	protein_coding	disease resistance protein (TIR-NBS-LRR class)	.	disease resistance protein (TIR-NBS-LRR class)%3B FUNCTIONS IN: transmembrane receptor activity%2C nucleoside-triphosphatase activity%2C nucleotide binding%2C ATP binding%3B INVOLVED IN: signal transduction%2C defense response%2C apoptosis%2C innate immune response%3B LOCATED IN: intrinsic to membrane%2C endomembrane system%3B EXPRESSED IN: 21 plant structures%3B EXPRESSED DURING: 13 growth stage…	.	disease resistance protein (TIR-NBS-LRR class)%3B FUNCTIONS IN: transmembrane receptor activity%2C nucleoside-triphosphatase activity%2C nucleotide binding%2C ATP binding%3B INVOLVED IN: signal transduction%2C defense response%2C apoptosis%2C innate immune response%3B LOCATED IN: intrinsic to membrane%2C endomembrane system%3B EXPRESSED IN: 21 plant structures%3B EXPRESSED DURING: 13 growth stage…	scaffold_2	13828335	13831656	3322	-	scaffold_2	13830195	13830512	318	*	0.913500621	-0.030288259	216.5317031	0.930285714	5.672006896	0.012212842	1.5368	0.661714286	0.930285714	0.008	0.04967033	0.796	0.134285714	-2.383060157	-2.896130554	-4.70071949	-0.698897914	51	MODIFIER	MODERATE	NO	1	0	A	B	-2.46064088071173	-2.03012129755599	-0.723701571652774	-0.057828782159605	-1.7400726356597238
AL2G28690	AT1G69550	OG0000726	.	protein_coding	disease resistance protein (TIR-NBS-LRR class)	.	disease resistance protein (TIR-NBS-LRR class)%3B FUNCTIONS IN: transmembrane receptor activity%2C nucleoside-triphosphatase activity%2C nucleotide binding%2C ATP binding%3B INVOLVED IN: signal transduction%2C defense response%2C apoptosis%2C innate immune response%3B LOCATED IN: intrinsic to membrane%2C endomembrane system%3B EXPRESSED IN: 21 plant structures%3B EXPRESSED DURING: 13 growth stage…	.	disease resistance protein (TIR-NBS-LRR class)%3B FUNCTIONS IN: transmembrane receptor activity%2C nucleoside-triphosphatase activity%2C nucleotide binding%2C ATP binding%3B INVOLVED IN: signal transduction%2C defense response%2C apoptosis%2C innate immune response%3B LOCATED IN: intrinsic to membrane%2C endomembrane system%3B EXPRESSED IN: 21 plant structures%3B EXPRESSED DURING: 13 growth stage…	scaffold_2	13828335	13831656	3322	-	scaffold_2	13827872	13828399	528	*	1	-0.024118791	251.4477026	1	6.279705116	0.012212842	0	0.6	1	0	0	0.8	0.2	-2.452671681	-3.439414612	-4.76988279	-1.58546286	1	MODIFIER	NO	NO	1	0	A	B	-2.46064088071173	-3.62732960161472	-0.723701571652774	0	-1.7400726356597238
AL2G28690	AT1G69550	OG0000726	.	protein_coding	disease resistance protein (TIR-NBS-LRR class)	.	disease resistance protein (TIR-NBS-LRR class)%3B FUNCTIONS IN: transmembrane receptor activity%2C nucleoside-triphosphatase activity%2C nucleotide binding%2C ATP binding%3B INVOLVED IN: signal transduction%2C defense response%2C apoptosis%2C innate immune response%3B LOCATED IN: intrinsic to membrane%2C endomembrane system%3B EXPRESSED IN: 21 plant structures%3B EXPRESSED DURING: 13 growth stage…	.	disease resistance protein (TIR-NBS-LRR class)%3B FUNCTIONS IN: transmembrane receptor activity%2C nucleoside-triphosphatase activity%2C nucleotide binding%2C ATP binding%3B INVOLVED IN: signal transduction%2C defense response%2C apoptosis%2C innate immune response%3B LOCATED IN: intrinsic to membrane%2C endomembrane system%3B EXPRESSED IN: 21 plant structures%3B EXPRESSED DURING: 13 growth stage…	scaffold_2	13828335	13831656	3322	-	scaffold_2	13830195	13830512	318	*	0.913500621	-0.030288259	216.5317031	0.930285714	5.672006896	0.012212842	1.5368	0.661714286	0.930285714	0.008	0.04967033	0.796	0.134285714	-2.383060157	-2.896130554	-4.70071949	-0.698897914	48	MODIFIER	MODERATE	NO	1	0	A	B	-2.46064088071173	-2.03012129755599	-0.723701571652774	-0.057828782159605	-1.7400726356597238
AL2G28690	AT1G69550	OG0000726	.	protein_coding	disease resistance protein (TIR-NBS-LRR class)	.	disease resistance protein (TIR-NBS-LRR class)%3B FUNCTIONS IN: transmembrane receptor activity%2C nucleoside-triphosphatase activity%2C nucleotide binding%2C ATP binding%3B INVOLVED IN: signal transduction%2C defense response%2C apoptosis%2C innate immune response%3B LOCATED IN: intrinsic to membrane%2C endomembrane system%3B EXPRESSED IN: 21 plant structures%3B EXPRESSED DURING: 13 growth stage…	.	disease resistance protein (TIR-NBS-LRR class)%3B FUNCTIONS IN: transmembrane receptor activity%2C nucleoside-triphosphatase activity%2C nucleotide binding%2C ATP binding%3B INVOLVED IN: signal transduction%2C defense response%2C apoptosis%2C innate immune response%3B LOCATED IN: intrinsic to membrane%2C endomembrane system%3B EXPRESSED IN: 21 plant structures%3B EXPRESSED DURING: 13 growth stage…	scaffold_2	13828335	13831656	3322	-	scaffold_2	13828402	13828770	369	*	0.965529954	-0.030433127	253.0713206	0.968571429	6.046728152	0.012212842	0	0.951428571	0.968571429	0	0.014505495	0.96	0.008571429	-2.452671681	-3.280756436	-5.723859348	0.038827662	22	MODIFIER	MODERATE	HIGH	1	0	A	B	-2.46064088071173	-2.7906966804411	-0.723701571652774	-0.214792619449961	-1.7400726356597238
AL2G28690	AT1G69550	OG0000726	.	protein_coding	disease resistance protein (TIR-NBS-LRR class)	.	disease resistance protein (TIR-NBS-LRR class)%3B FUNCTIONS IN: transmembrane receptor activity%2C nucleoside-triphosphatase activity%2C nucleotide binding%2C ATP binding%3B INVOLVED IN: signal transduction%2C defense response%2C apoptosis%2C innate immune response%3B LOCATED IN: intrinsic to membrane%2C endomembrane system%3B EXPRESSED IN: 21 plant structures%3B EXPRESSED DURING: 13 growth stage…	.	disease resistance protein (TIR-NBS-LRR class)%3B FUNCTIONS IN: transmembrane receptor activity%2C nucleoside-triphosphatase activity%2C nucleotide binding%2C ATP binding%3B INVOLVED IN: signal transduction%2C defense response%2C apoptosis%2C innate immune response%3B LOCATED IN: intrinsic to membrane%2C endomembrane system%3B EXPRESSED IN: 21 plant structures%3B EXPRESSED DURING: 13 growth stage…	scaffold_2	13828335	13831656	3322	-	scaffold_2	13828402	13828770	369	*	0.965529954	-0.030433127	253.0713206	0.968571429	6.046728152	0.012212842	0	0.951428571	0.968571429	0	0.014505495	0.96	0.008571429	-2.452671681	-3.280756436	-5.723859348	0.038827662	22	MODIFIER	MODERATE	HIGH	1	0	A	B	-2.46064088071173	-2.7906966804411	-0.723701571652774	-0.214792619449961	-1.7400726356597238
AL2G28690	AT1G69550	OG0000726	.	protein_coding	disease resistance protein (TIR-NBS-LRR class)	.	disease resistance protein (TIR-NBS-LRR class)%3B FUNCTIONS IN: transmembrane receptor activity%2C nucleoside-triphosphatase activity%2C nucleotide binding%2C ATP binding%3B INVOLVED IN: signal transduction%2C defense response%2C apoptosis%2C innate immune response%3B LOCATED IN: intrinsic to membrane%2C endomembrane system%3B EXPRESSED IN: 21 plant structures%3B EXPRESSED DURING: 13 growth stage…	.	disease resistance protein (TIR-NBS-LRR class)%3B FUNCTIONS IN: transmembrane receptor activity%2C nucleoside-triphosphatase activity%2C nucleotide binding%2C ATP binding%3B INVOLVED IN: signal transduction%2C defense response%2C apoptosis%2C innate immune response%3B LOCATED IN: intrinsic to membrane%2C endomembrane system%3B EXPRESSED IN: 21 plant structures%3B EXPRESSED DURING: 13 growth stage…	scaffold_2	13828335	13831656	3322	-	scaffold_2	13828402	13828770	369	*	0.965529954	-0.030433127	253.0713206	0.968571429	6.046728152	0.012212842	0	0.951428571	0.968571429	0	0.014505495	0.96	0.008571429	-2.452671681	-3.280756436	-5.723859348	0.038827662	21	MODIFIER	MODERATE	HIGH	1	0	A	B	-2.46064088071173	-2.7906966804411	-0.723701571652774	-0.214792619449961	-1.7400726356597238
AL2G28690	AT1G69550	OG0000726	.	protein_coding	disease resistance protein (TIR-NBS-LRR class)	.	disease resistance protein (TIR-NBS-LRR class)%3B FUNCTIONS IN: transmembrane receptor activity%2C nucleoside-triphosphatase activity%2C nucleotide binding%2C ATP binding%3B INVOLVED IN: signal transduction%2C defense response%2C apoptosis%2C innate immune response%3B LOCATED IN: intrinsic to membrane%2C endomembrane system%3B EXPRESSED IN: 21 plant structures%3B EXPRESSED DURING: 13 growth stage…	.	disease resistance protein (TIR-NBS-LRR class)%3B FUNCTIONS IN: transmembrane receptor activity%2C nucleoside-triphosphatase activity%2C nucleotide binding%2C ATP binding%3B INVOLVED IN: signal transduction%2C defense response%2C apoptosis%2C innate immune response%3B LOCATED IN: intrinsic to membrane%2C endomembrane system%3B EXPRESSED IN: 21 plant structures%3B EXPRESSED DURING: 13 growth stage…	scaffold_2	13828335	13831656	3322	-	scaffold_2	13828402	13828770	369	*	0.965529954	-0.030433127	253.0713206	0.968571429	6.046728152	0.012212842	0	0.951428571	0.968571429	0	0.014505495	0.96	0.008571429	-2.452671681	-3.280756436	-5.723859348	0.038827662	21	MODIFIER	MODERATE	HIGH	1	0	A	B	-2.46064088071173	-2.7906966804411	-0.723701571652774	-0.214792619449961	-1.7400726356597238
AL2G28690	AT1G69550	OG0000726	.	protein_coding	disease resistance protein (TIR-NBS-LRR class)	.	disease resistance protein (TIR-NBS-LRR class)%3B FUNCTIONS IN: transmembrane receptor activity%2C nucleoside-triphosphatase activity%2C nucleotide binding%2C ATP binding%3B INVOLVED IN: signal transduction%2C defense response%2C apoptosis%2C innate immune response%3B LOCATED IN: intrinsic to membrane%2C endomembrane system%3B EXPRESSED IN: 21 plant structures%3B EXPRESSED DURING: 13 growth stage…	.	disease resistance protein (TIR-NBS-LRR class)%3B FUNCTIONS IN: transmembrane receptor activity%2C nucleoside-triphosphatase activity%2C nucleotide binding%2C ATP binding%3B INVOLVED IN: signal transduction%2C defense response%2C apoptosis%2C innate immune response%3B LOCATED IN: intrinsic to membrane%2C endomembrane system%3B EXPRESSED IN: 21 plant structures%3B EXPRESSED DURING: 13 growth stage…	scaffold_2	13828335	13831656	3322	-	scaffold_2	13827872	13828399	528	*	1	-0.024118791	251.4477026	1	6.279705116	0.012212842	0	0.6	1	0	0	0.8	0.2	-2.452671681	-3.439414612	-4.76988279	-1.58546286	1	MODIFIER	NO	NO	1	0	A	B	-2.46064088071173	-3.62732960161472	-0.723701571652774	0	-1.7400726356597238
AL2G28690	AT1G69550	OG0000726	.	protein_coding	disease resistance protein (TIR-NBS-LRR class)	.	disease resistance protein (TIR-NBS-LRR class)%3B FUNCTIONS IN: transmembrane receptor activity%2C nucleoside-triphosphatase activity%2C nucleotide binding%2C ATP binding%3B INVOLVED IN: signal transduction%2C defense response%2C apoptosis%2C innate immune response%3B LOCATED IN: intrinsic to membrane%2C endomembrane system%3B EXPRESSED IN: 21 plant structures%3B EXPRESSED DURING: 13 growth stage…	.	disease resistance protein (TIR-NBS-LRR class)%3B FUNCTIONS IN: transmembrane receptor activity%2C nucleoside-triphosphatase activity%2C nucleotide binding%2C ATP binding%3B INVOLVED IN: signal transduction%2C defense response%2C apoptosis%2C innate immune response%3B LOCATED IN: intrinsic to membrane%2C endomembrane system%3B EXPRESSED IN: 21 plant structures%3B EXPRESSED DURING: 13 growth stage…	scaffold_2	13828335	13831656	3322	-	scaffold_2	13827872	13828399	528	*	1	-0.024118791	251.4477026	1	6.279705116	0.012212842	0	0.6	1	0	0	0.8	0.2	-2.452671681	-3.439414612	-4.76988279	-1.58546286	1	MODIFIER	NO	NO	1	0	A	B	-2.46064088071173	-3.62732960161472	-0.723701571652774	0	-1.7400726356597238
AL2G28690	AT1G69550	OG0000726	.	protein_coding	disease resistance protein (TIR-NBS-LRR class)	.	disease resistance protein (TIR-NBS-LRR class)%3B FUNCTIONS IN: transmembrane receptor activity%2C nucleoside-triphosphatase activity%2C nucleotide binding%2C ATP binding%3B INVOLVED IN: signal transduction%2C defense response%2C apoptosis%2C innate immune response%3B LOCATED IN: intrinsic to membrane%2C endomembrane system%3B EXPRESSED IN: 21 plant structures%3B EXPRESSED DURING: 13 growth stage…	.	disease resistance protein (TIR-NBS-LRR class)%3B FUNCTIONS IN: transmembrane receptor activity%2C nucleoside-triphosphatase activity%2C nucleotide binding%2C ATP binding%3B INVOLVED IN: signal transduction%2C defense response%2C apoptosis%2C innate immune response%3B LOCATED IN: intrinsic to membrane%2C endomembrane system%3B EXPRESSED IN: 21 plant structures%3B EXPRESSED DURING: 13 growth stage…	scaffold_2	13828335	13831656	3322	-	scaffold_2	13828402	13828770	369	*	0.965529954	-0.030433127	253.0713206	0.968571429	6.046728152	0.012212842	0	0.951428571	0.968571429	0	0.014505495	0.96	0.008571429	-2.452671681	-3.280756436	-5.723859348	0.038827662	21	MODIFIER	MODERATE	HIGH	1	0	A	B	-2.46064088071173	-2.7906966804411	-0.723701571652774	-0.214792619449961	-1.7400726356597238
AL2G28690	AT1G69550	OG0000726	.	protein_coding	disease resistance protein (TIR-NBS-LRR class)	.	disease resistance protein (TIR-NBS-LRR class)%3B FUNCTIONS IN: transmembrane receptor activity%2C nucleoside-triphosphatase activity%2C nucleotide binding%2C ATP binding%3B INVOLVED IN: signal transduction%2C defense response%2C apoptosis%2C innate immune response%3B LOCATED IN: intrinsic to membrane%2C endomembrane system%3B EXPRESSED IN: 21 plant structures%3B EXPRESSED DURING: 13 growth stage…	.	disease resistance protein (TIR-NBS-LRR class)%3B FUNCTIONS IN: transmembrane receptor activity%2C nucleoside-triphosphatase activity%2C nucleotide binding%2C ATP binding%3B INVOLVED IN: signal transduction%2C defense response%2C apoptosis%2C innate immune response%3B LOCATED IN: intrinsic to membrane%2C endomembrane system%3B EXPRESSED IN: 21 plant structures%3B EXPRESSED DURING: 13 growth stage…	scaffold_2	13828335	13831656	3322	-	scaffold_2	13828402	13828770	369	*	0.965529954	-0.030433127	253.0713206	0.968571429	6.046728152	0.012212842	0	0.951428571	0.968571429	0	0.014505495	0.96	0.008571429	-2.452671681	-3.280756436	-5.723859348	0.038827662	22	MODIFIER	MODERATE	HIGH	1	0	A	B	-2.46064088071173	-2.7906966804411	-0.723701571652774	-0.214792619449961	-1.7400726356597238
AL2G28690	AT1G69550	OG0000726	.	protein_coding	disease resistance protein (TIR-NBS-LRR class)	.	disease resistance protein (TIR-NBS-LRR class)%3B FUNCTIONS IN: transmembrane receptor activity%2C nucleoside-triphosphatase activity%2C nucleotide binding%2C ATP binding%3B INVOLVED IN: signal transduction%2C defense response%2C apoptosis%2C innate immune response%3B LOCATED IN: intrinsic to membrane%2C endomembrane system%3B EXPRESSED IN: 21 plant structures%3B EXPRESSED DURING: 13 growth stage…	.	disease resistance protein (TIR-NBS-LRR class)%3B FUNCTIONS IN: transmembrane receptor activity%2C nucleoside-triphosphatase activity%2C nucleotide binding%2C ATP binding%3B INVOLVED IN: signal transduction%2C defense response%2C apoptosis%2C innate immune response%3B LOCATED IN: intrinsic to membrane%2C endomembrane system%3B EXPRESSED IN: 21 plant structures%3B EXPRESSED DURING: 13 growth stage…	scaffold_2	13828335	13831656	3322	-	scaffold_2	13830195	13830512	318	*	0.913500621	-0.030288259	216.5317031	0.930285714	5.672006896	0.012212842	1.5368	0.661714286	0.930285714	0.008	0.04967033	0.796	0.134285714	-2.383060157	-2.896130554	-4.70071949	-0.698897914	51	MODIFIER	MODERATE	NO	1	0	A	B	-2.46064088071173	-2.03012129755599	-0.723701571652774	-0.057828782159605	-1.7400726356597238
AL2G28690	AT1G69550	OG0000726	.	protein_coding	disease resistance protein (TIR-NBS-LRR class)	.	disease resistance protein (TIR-NBS-LRR class)%3B FUNCTIONS IN: transmembrane receptor activity%2C nucleoside-triphosphatase activity%2C nucleotide binding%2C ATP binding%3B INVOLVED IN: signal transduction%2C defense response%2C apoptosis%2C innate immune response%3B LOCATED IN: intrinsic to membrane%2C endomembrane system%3B EXPRESSED IN: 21 plant structures%3B EXPRESSED DURING: 13 growth stage…	.	disease resistance protein (TIR-NBS-LRR class)%3B FUNCTIONS IN: transmembrane receptor activity%2C nucleoside-triphosphatase activity%2C nucleotide binding%2C ATP binding%3B INVOLVED IN: signal transduction%2C defense response%2C apoptosis%2C innate immune response%3B LOCATED IN: intrinsic to membrane%2C endomembrane system%3B EXPRESSED IN: 21 plant structures%3B EXPRESSED DURING: 13 growth stage…	scaffold_2	13828335	13831656	3322	-	scaffold_2	13828402	13828770	369	*	0.965529954	-0.030433127	253.0713206	0.968571429	6.046728152	0.012212842	0	0.951428571	0.968571429	0	0.014505495	0.96	0.008571429	-2.452671681	-3.280756436	-5.723859348	0.038827662	21	MODIFIER	MODERATE	HIGH	1	0	A	B	-2.46064088071173	-2.7906966804411	-0.723701571652774	-0.214792619449961	-1.7400726356597238
AL2G28690	AT1G69550	OG0000726	.	protein_coding	disease resistance protein (TIR-NBS-LRR class)	.	disease resistance protein (TIR-NBS-LRR class)%3B FUNCTIONS IN: transmembrane receptor activity%2C nucleoside-triphosphatase activity%2C nucleotide binding%2C ATP binding%3B INVOLVED IN: signal transduction%2C defense response%2C apoptosis%2C innate immune response%3B LOCATED IN: intrinsic to membrane%2C endomembrane system%3B EXPRESSED IN: 21 plant structures%3B EXPRESSED DURING: 13 growth stage…	.	disease resistance protein (TIR-NBS-LRR class)%3B FUNCTIONS IN: transmembrane receptor activity%2C nucleoside-triphosphatase activity%2C nucleotide binding%2C ATP binding%3B INVOLVED IN: signal transduction%2C defense response%2C apoptosis%2C innate immune response%3B LOCATED IN: intrinsic to membrane%2C endomembrane system%3B EXPRESSED IN: 21 plant structures%3B EXPRESSED DURING: 13 growth stage…	scaffold_2	13828335	13831656	3322	-	scaffold_2	13830195	13830512	318	*	0.913500621	-0.030288259	216.5317031	0.930285714	5.672006896	0.012212842	1.5368	0.661714286	0.930285714	0.008	0.04967033	0.796	0.134285714	-2.383060157	-2.896130554	-4.70071949	-0.698897914	48	MODIFIER	MODERATE	NO	1	0	A	B	-2.46064088071173	-2.03012129755599	-0.723701571652774	-0.057828782159605	-1.7400726356597238
AL2G28690	AT1G69550	OG0000726	.	protein_coding	disease resistance protein (TIR-NBS-LRR class)	.	disease resistance protein (TIR-NBS-LRR class)%3B FUNCTIONS IN: transmembrane receptor activity%2C nucleoside-triphosphatase activity%2C nucleotide binding%2C ATP binding%3B INVOLVED IN: signal transduction%2C defense response%2C apoptosis%2C innate immune response%3B LOCATED IN: intrinsic to membrane%2C endomembrane system%3B EXPRESSED IN: 21 plant structures%3B EXPRESSED DURING: 13 growth stage…	.	disease resistance protein (TIR-NBS-LRR class)%3B FUNCTIONS IN: transmembrane receptor activity%2C nucleoside-triphosphatase activity%2C nucleotide binding%2C ATP binding%3B INVOLVED IN: signal transduction%2C defense response%2C apoptosis%2C innate immune response%3B LOCATED IN: intrinsic to membrane%2C endomembrane system%3B EXPRESSED IN: 21 plant structures%3B EXPRESSED DURING: 13 growth stage…	scaffold_2	13828335	13831656	3322	-	scaffold_2	13830195	13830512	318	*	0.913500621	-0.030288259	216.5317031	0.930285714	5.672006896	0.012212842	1.5368	0.661714286	0.930285714	0.008	0.04967033	0.796	0.134285714	-2.383060157	-2.896130554	-4.70071949	-0.698897914	51	MODIFIER	MODERATE	NO	1	0	A	B	-2.46064088071173	-2.03012129755599	-0.723701571652774	-0.057828782159605	-1.7400726356597238
AL2G28690	AT1G69550	OG0000726	.	protein_coding	disease resistance protein (TIR-NBS-LRR class)	.	disease resistance protein (TIR-NBS-LRR class)%3B FUNCTIONS IN: transmembrane receptor activity%2C nucleoside-triphosphatase activity%2C nucleotide binding%2C ATP binding%3B INVOLVED IN: signal transduction%2C defense response%2C apoptosis%2C innate immune response%3B LOCATED IN: intrinsic to membrane%2C endomembrane system%3B EXPRESSED IN: 21 plant structures%3B EXPRESSED DURING: 13 growth stage…	.	disease resistance protein (TIR-NBS-LRR class)%3B FUNCTIONS IN: transmembrane receptor activity%2C nucleoside-triphosphatase activity%2C nucleotide binding%2C ATP binding%3B INVOLVED IN: signal transduction%2C defense response%2C apoptosis%2C innate immune response%3B LOCATED IN: intrinsic to membrane%2C endomembrane system%3B EXPRESSED IN: 21 plant structures%3B EXPRESSED DURING: 13 growth stage…	scaffold_2	13828335	13831656	3322	-	scaffold_2	13827872	13828399	528	*	1	-0.024118791	251.4477026	1	6.279705116	0.012212842	0	0.6	1	0	0	0.8	0.2	-2.452671681	-3.439414612	-4.76988279	-1.58546286	1	MODIFIER	NO	NO	1	0	A	B	-2.46064088071173	-3.62732960161472	-0.723701571652774	0	-1.7400726356597238
AL2G28690	AT3G25510	OG0000726	.	protein_coding	disease resistance protein (TIR-NBS-LRR class) family protein	.	disease resistance protein (TIR-NBS-LRR class)%2C putative%3B FUNCTIONS IN: transmembrane receptor activity%2C nucleoside-triphosphatase activity%2C nucleotide binding%2C ATP binding%3B INVOLVED IN: signal transduction%2C defense response%2C apoptosis%2C innate immune response%3B LOCATED IN: intrinsic to membrane%3B EXPRESSED IN: epidermis%3B CONTAINS InterPro DOMAIN/s: ATPase%2C AAA+ type%2C cor…	.	disease resistance protein (TIR-NBS-LRR class)%2C putative%3B FUNCTIONS IN: transmembrane receptor activity%2C nucleoside-triphosphatase activity%2C nucleotide binding%2C ATP binding%3B INVOLVED IN: signal transduction%2C defense response%2C apoptosis%2C innate immune response%3B LOCATED IN: intrinsic to membrane%3B EXPRESSED IN: epidermis%3B CONTAINS InterPro DOMAIN/s: ATPase%2C AAA+ type%2C cor…	scaffold_2	13828335	13831656	3322	-	scaffold_2	13830195	13830512	318	*	0.913500621	-0.030288259	216.5317031	0.930285714	5.672006896	0.012212842	1.5368	0.661714286	0.930285714	0.008	0.04967033	0.796	0.134285714	-2.383060157	-2.896130554	-4.70071949	-0.698897914	48	MODIFIER	MODERATE	NO	1	0	A	B	-2.46064088071173	-2.03012129755599	-0.723701571652774	-0.057828782159605	-1.7400726356597238
AL2G28690	AT3G25510	OG0000726	.	protein_coding	disease resistance protein (TIR-NBS-LRR class) family protein	.	disease resistance protein (TIR-NBS-LRR class)%2C putative%3B FUNCTIONS IN: transmembrane receptor activity%2C nucleoside-triphosphatase activity%2C nucleotide binding%2C ATP binding%3B INVOLVED IN: signal transduction%2C defense response%2C apoptosis%2C innate immune response%3B LOCATED IN: intrinsic to membrane%3B EXPRESSED IN: epidermis%3B CONTAINS InterPro DOMAIN/s: ATPase%2C AAA+ type%2C cor…	.	disease resistance protein (TIR-NBS-LRR class)%2C putative%3B FUNCTIONS IN: transmembrane receptor activity%2C nucleoside-triphosphatase activity%2C nucleotide binding%2C ATP binding%3B INVOLVED IN: signal transduction%2C defense response%2C apoptosis%2C innate immune response%3B LOCATED IN: intrinsic to membrane%3B EXPRESSED IN: epidermis%3B CONTAINS InterPro DOMAIN/s: ATPase%2C AAA+ type%2C cor…	scaffold_2	13828335	13831656	3322	-	scaffold_2	13830195	13830512	318	*	0.913500621	-0.030288259	216.5317031	0.930285714	5.672006896	0.012212842	1.5368	0.661714286	0.930285714	0.008	0.04967033	0.796	0.134285714	-2.383060157	-2.896130554	-4.70071949	-0.698897914	48	MODIFIER	MODERATE	NO	1	0	A	B	-2.46064088071173	-2.03012129755599	-0.723701571652774	-0.057828782159605	-1.7400726356597238
AL2G28690	AT3G25510	OG0000726	.	protein_coding	disease resistance protein (TIR-NBS-LRR class) family protein	.	disease resistance protein (TIR-NBS-LRR class)%2C putative%3B FUNCTIONS IN: transmembrane receptor activity%2C nucleoside-triphosphatase activity%2C nucleotide binding%2C ATP binding%3B INVOLVED IN: signal transduction%2C defense response%2C apoptosis%2C innate immune response%3B LOCATED IN: intrinsic to membrane%3B EXPRESSED IN: epidermis%3B CONTAINS InterPro DOMAIN/s: ATPase%2C AAA+ type%2C cor…	.	disease resistance protein (TIR-NBS-LRR class)%2C putative%3B FUNCTIONS IN: transmembrane receptor activity%2C nucleoside-triphosphatase activity%2C nucleotide binding%2C ATP binding%3B INVOLVED IN: signal transduction%2C defense response%2C apoptosis%2C innate immune response%3B LOCATED IN: intrinsic to membrane%3B EXPRESSED IN: epidermis%3B CONTAINS InterPro DOMAIN/s: ATPase%2C AAA+ type%2C cor…	scaffold_2	13828335	13831656	3322	-	scaffold_2	13830195	13830512	318	*	0.913500621	-0.030288259	216.5317031	0.930285714	5.672006896	0.012212842	1.5368	0.661714286	0.930285714	0.008	0.04967033	0.796	0.134285714	-2.383060157	-2.896130554	-4.70071949	-0.698897914	51	MODIFIER	MODERATE	NO	1	0	A	B	-2.46064088071173	-2.03012129755599	-0.723701571652774	-0.057828782159605	-1.7400726356597238
AL2G28690	AT3G25510	OG0000726	.	protein_coding	disease resistance protein (TIR-NBS-LRR class) family protein	.	disease resistance protein (TIR-NBS-LRR class)%2C putative%3B FUNCTIONS IN: transmembrane receptor activity%2C nucleoside-triphosphatase activity%2C nucleotide binding%2C ATP binding%3B INVOLVED IN: signal transduction%2C defense response%2C apoptosis%2C innate immune response%3B LOCATED IN: intrinsic to membrane%3B EXPRESSED IN: epidermis%3B CONTAINS InterPro DOMAIN/s: ATPase%2C AAA+ type%2C cor…	.	disease resistance protein (TIR-NBS-LRR class)%2C putative%3B FUNCTIONS IN: transmembrane receptor activity%2C nucleoside-triphosphatase activity%2C nucleotide binding%2C ATP binding%3B INVOLVED IN: signal transduction%2C defense response%2C apoptosis%2C innate immune response%3B LOCATED IN: intrinsic to membrane%3B EXPRESSED IN: epidermis%3B CONTAINS InterPro DOMAIN/s: ATPase%2C AAA+ type%2C cor…	scaffold_2	13828335	13831656	3322	-	scaffold_2	13828402	13828770	369	*	0.965529954	-0.030433127	253.0713206	0.968571429	6.046728152	0.012212842	0	0.951428571	0.968571429	0	0.014505495	0.96	0.008571429	-2.452671681	-3.280756436	-5.723859348	0.038827662	22	MODIFIER	MODERATE	HIGH	1	0	A	B	-2.46064088071173	-2.7906966804411	-0.723701571652774	-0.214792619449961	-1.7400726356597238
AL2G28690	AT3G25510	OG0000726	.	protein_coding	disease resistance protein (TIR-NBS-LRR class) family protein	.	disease resistance protein (TIR-NBS-LRR class)%2C putative%3B FUNCTIONS IN: transmembrane receptor activity%2C nucleoside-triphosphatase activity%2C nucleotide binding%2C ATP binding%3B INVOLVED IN: signal transduction%2C defense response%2C apoptosis%2C innate immune response%3B LOCATED IN: intrinsic to membrane%3B EXPRESSED IN: epidermis%3B CONTAINS InterPro DOMAIN/s: ATPase%2C AAA+ type%2C cor…	.	disease resistance protein (TIR-NBS-LRR class)%2C putative%3B FUNCTIONS IN: transmembrane receptor activity%2C nucleoside-triphosphatase activity%2C nucleotide binding%2C ATP binding%3B INVOLVED IN: signal transduction%2C defense response%2C apoptosis%2C innate immune response%3B LOCATED IN: intrinsic to membrane%3B EXPRESSED IN: epidermis%3B CONTAINS InterPro DOMAIN/s: ATPase%2C AAA+ type%2C cor…	scaffold_2	13828335	13831656	3322	-	scaffold_2	13830195	13830512	318	*	0.913500621	-0.030288259	216.5317031	0.930285714	5.672006896	0.012212842	1.5368	0.661714286	0.930285714	0.008	0.04967033	0.796	0.134285714	-2.383060157	-2.896130554	-4.70071949	-0.698897914	51	MODIFIER	MODERATE	NO	1	0	A	B	-2.46064088071173	-2.03012129755599	-0.723701571652774	-0.057828782159605	-1.7400726356597238
AL2G28690	AT3G25510	OG0000726	.	protein_coding	disease resistance protein (TIR-NBS-LRR class) family protein	.	disease resistance protein (TIR-NBS-LRR class)%2C putative%3B FUNCTIONS IN: transmembrane receptor activity%2C nucleoside-triphosphatase activity%2C nucleotide binding%2C ATP binding%3B INVOLVED IN: signal transduction%2C defense response%2C apoptosis%2C innate immune response%3B LOCATED IN: intrinsic to membrane%3B EXPRESSED IN: epidermis%3B CONTAINS InterPro DOMAIN/s: ATPase%2C AAA+ type%2C cor…	.	disease resistance protein (TIR-NBS-LRR class)%2C putative%3B FUNCTIONS IN: transmembrane receptor activity%2C nucleoside-triphosphatase activity%2C nucleotide binding%2C ATP binding%3B INVOLVED IN: signal transduction%2C defense response%2C apoptosis%2C innate immune response%3B LOCATED IN: intrinsic to membrane%3B EXPRESSED IN: epidermis%3B CONTAINS InterPro DOMAIN/s: ATPase%2C AAA+ type%2C cor…	scaffold_2	13828335	13831656	3322	-	scaffold_2	13827872	13828399	528	*	1	-0.024118791	251.4477026	1	6.279705116	0.012212842	0	0.6	1	0	0	0.8	0.2	-2.452671681	-3.439414612	-4.76988279	-1.58546286	1	MODIFIER	NO	NO	1	0	A	B	-2.46064088071173	-3.62732960161472	-0.723701571652774	0	-1.7400726356597238
AL2G28690	AT3G25510	OG0000726	.	protein_coding	disease resistance protein (TIR-NBS-LRR class) family protein	.	disease resistance protein (TIR-NBS-LRR class)%2C putative%3B FUNCTIONS IN: transmembrane receptor activity%2C nucleoside-triphosphatase activity%2C nucleotide binding%2C ATP binding%3B INVOLVED IN: signal transduction%2C defense response%2C apoptosis%2C innate immune response%3B LOCATED IN: intrinsic to membrane%3B EXPRESSED IN: epidermis%3B CONTAINS InterPro DOMAIN/s: ATPase%2C AAA+ type%2C cor…	.	disease resistance protein (TIR-NBS-LRR class)%2C putative%3B FUNCTIONS IN: transmembrane receptor activity%2C nucleoside-triphosphatase activity%2C nucleotide binding%2C ATP binding%3B INVOLVED IN: signal transduction%2C defense response%2C apoptosis%2C innate immune response%3B LOCATED IN: intrinsic to membrane%3B EXPRESSED IN: epidermis%3B CONTAINS InterPro DOMAIN/s: ATPase%2C AAA+ type%2C cor…	scaffold_2	13828335	13831656	3322	-	scaffold_2	13830195	13830512	318	*	0.913500621	-0.030288259	216.5317031	0.930285714	5.672006896	0.012212842	1.5368	0.661714286	0.930285714	0.008	0.04967033	0.796	0.134285714	-2.383060157	-2.896130554	-4.70071949	-0.698897914	48	MODIFIER	MODERATE	NO	1	0	A	B	-2.46064088071173	-2.03012129755599	-0.723701571652774	-0.057828782159605	-1.7400726356597238
AL2G28690	AT3G25510	OG0000726	.	protein_coding	disease resistance protein (TIR-NBS-LRR class) family protein	.	disease resistance protein (TIR-NBS-LRR class)%2C putative%3B FUNCTIONS IN: transmembrane receptor activity%2C nucleoside-triphosphatase activity%2C nucleotide binding%2C ATP binding%3B INVOLVED IN: signal transduction%2C defense response%2C apoptosis%2C innate immune response%3B LOCATED IN: intrinsic to membrane%3B EXPRESSED IN: epidermis%3B CONTAINS InterPro DOMAIN/s: ATPase%2C AAA+ type%2C cor…	.	disease resistance protein (TIR-NBS-LRR class)%2C putative%3B FUNCTIONS IN: transmembrane receptor activity%2C nucleoside-triphosphatase activity%2C nucleotide binding%2C ATP binding%3B INVOLVED IN: signal transduction%2C defense response%2C apoptosis%2C innate immune response%3B LOCATED IN: intrinsic to membrane%3B EXPRESSED IN: epidermis%3B CONTAINS InterPro DOMAIN/s: ATPase%2C AAA+ type%2C cor…	scaffold_2	13828335	13831656	3322	-	scaffold_2	13828402	13828770	369	*	0.965529954	-0.030433127	253.0713206	0.968571429	6.046728152	0.012212842	0	0.951428571	0.968571429	0	0.014505495	0.96	0.008571429	-2.452671681	-3.280756436	-5.723859348	0.038827662	22	MODIFIER	MODERATE	HIGH	1	0	A	B	-2.46064088071173	-2.7906966804411	-0.723701571652774	-0.214792619449961	-1.7400726356597238
AL2G28690	AT3G25510	OG0000726	.	protein_coding	disease resistance protein (TIR-NBS-LRR class) family protein	.	disease resistance protein (TIR-NBS-LRR class)%2C putative%3B FUNCTIONS IN: transmembrane receptor activity%2C nucleoside-triphosphatase activity%2C nucleotide binding%2C ATP binding%3B INVOLVED IN: signal transduction%2C defense response%2C apoptosis%2C innate immune response%3B LOCATED IN: intrinsic to membrane%3B EXPRESSED IN: epidermis%3B CONTAINS InterPro DOMAIN/s: ATPase%2C AAA+ type%2C cor…	.	disease resistance protein (TIR-NBS-LRR class)%2C putative%3B FUNCTIONS IN: transmembrane receptor activity%2C nucleoside-triphosphatase activity%2C nucleotide binding%2C ATP binding%3B INVOLVED IN: signal transduction%2C defense response%2C apoptosis%2C innate immune response%3B LOCATED IN: intrinsic to membrane%3B EXPRESSED IN: epidermis%3B CONTAINS InterPro DOMAIN/s: ATPase%2C AAA+ type%2C cor…	scaffold_2	13828335	13831656	3322	-	scaffold_2	13828402	13828770	369	*	0.965529954	-0.030433127	253.0713206	0.968571429	6.046728152	0.012212842	0	0.951428571	0.968571429	0	0.014505495	0.96	0.008571429	-2.452671681	-3.280756436	-5.723859348	0.038827662	22	MODIFIER	MODERATE	HIGH	1	0	A	B	-2.46064088071173	-2.7906966804411	-0.723701571652774	-0.214792619449961	-1.7400726356597238
AL2G28690	AT3G25510	OG0000726	.	protein_coding	disease resistance protein (TIR-NBS-LRR class) family protein	.	disease resistance protein (TIR-NBS-LRR class)%2C putative%3B FUNCTIONS IN: transmembrane receptor activity%2C nucleoside-triphosphatase activity%2C nucleotide binding%2C ATP binding%3B INVOLVED IN: signal transduction%2C defense response%2C apoptosis%2C innate immune response%3B LOCATED IN: intrinsic to membrane%3B EXPRESSED IN: epidermis%3B CONTAINS InterPro DOMAIN/s: ATPase%2C AAA+ type%2C cor…	.	disease resistance protein (TIR-NBS-LRR class)%2C putative%3B FUNCTIONS IN: transmembrane receptor activity%2C nucleoside-triphosphatase activity%2C nucleotide binding%2C ATP binding%3B INVOLVED IN: signal transduction%2C defense response%2C apoptosis%2C innate immune response%3B LOCATED IN: intrinsic to membrane%3B EXPRESSED IN: epidermis%3B CONTAINS InterPro DOMAIN/s: ATPase%2C AAA+ type%2C cor…	scaffold_2	13828335	13831656	3322	-	scaffold_2	13828402	13828770	369	*	0.965529954	-0.030433127	253.0713206	0.968571429	6.046728152	0.012212842	0	0.951428571	0.968571429	0	0.014505495	0.96	0.008571429	-2.452671681	-3.280756436	-5.723859348	0.038827662	21	MODIFIER	MODERATE	HIGH	1	0	A	B	-2.46064088071173	-2.7906966804411	-0.723701571652774	-0.214792619449961	-1.7400726356597238
AL2G28690	AT3G25510	OG0000726	.	protein_coding	disease resistance protein (TIR-NBS-LRR class) family protein	.	disease resistance protein (TIR-NBS-LRR class)%2C putative%3B FUNCTIONS IN: transmembrane receptor activity%2C nucleoside-triphosphatase activity%2C nucleotide binding%2C ATP binding%3B INVOLVED IN: signal transduction%2C defense response%2C apoptosis%2C innate immune response%3B LOCATED IN: intrinsic to membrane%3B EXPRESSED IN: epidermis%3B CONTAINS InterPro DOMAIN/s: ATPase%2C AAA+ type%2C cor…	.	disease resistance protein (TIR-NBS-LRR class)%2C putative%3B FUNCTIONS IN: transmembrane receptor activity%2C nucleoside-triphosphatase activity%2C nucleotide binding%2C ATP binding%3B INVOLVED IN: signal transduction%2C defense response%2C apoptosis%2C innate immune response%3B LOCATED IN: intrinsic to membrane%3B EXPRESSED IN: epidermis%3B CONTAINS InterPro DOMAIN/s: ATPase%2C AAA+ type%2C cor…	scaffold_2	13828335	13831656	3322	-	scaffold_2	13828402	13828770	369	*	0.965529954	-0.030433127	253.0713206	0.968571429	6.046728152	0.012212842	0	0.951428571	0.968571429	0	0.014505495	0.96	0.008571429	-2.452671681	-3.280756436	-5.723859348	0.038827662	21	MODIFIER	MODERATE	HIGH	1	0	A	B	-2.46064088071173	-2.7906966804411	-0.723701571652774	-0.214792619449961	-1.7400726356597238
AL2G28690	AT3G25510	OG0000726	.	protein_coding	disease resistance protein (TIR-NBS-LRR class) family protein	.	disease resistance protein (TIR-NBS-LRR class)%2C putative%3B FUNCTIONS IN: transmembrane receptor activity%2C nucleoside-triphosphatase activity%2C nucleotide binding%2C ATP binding%3B INVOLVED IN: signal transduction%2C defense response%2C apoptosis%2C innate immune response%3B LOCATED IN: intrinsic to membrane%3B EXPRESSED IN: epidermis%3B CONTAINS InterPro DOMAIN/s: ATPase%2C AAA+ type%2C cor…	.	disease resistance protein (TIR-NBS-LRR class)%2C putative%3B FUNCTIONS IN: transmembrane receptor activity%2C nucleoside-triphosphatase activity%2C nucleotide binding%2C ATP binding%3B INVOLVED IN: signal transduction%2C defense response%2C apoptosis%2C innate immune response%3B LOCATED IN: intrinsic to membrane%3B EXPRESSED IN: epidermis%3B CONTAINS InterPro DOMAIN/s: ATPase%2C AAA+ type%2C cor…	scaffold_2	13828335	13831656	3322	-	scaffold_2	13827872	13828399	528	*	1	-0.024118791	251.4477026	1	6.279705116	0.012212842	0	0.6	1	0	0	0.8	0.2	-2.452671681	-3.439414612	-4.76988279	-1.58546286	1	MODIFIER	NO	NO	1	0	A	B	-2.46064088071173	-3.62732960161472	-0.723701571652774	0	-1.7400726356597238
AL2G28690	AT3G25510	OG0000726	.	protein_coding	disease resistance protein (TIR-NBS-LRR class) family protein	.	disease resistance protein (TIR-NBS-LRR class)%2C putative%3B FUNCTIONS IN: transmembrane receptor activity%2C nucleoside-triphosphatase activity%2C nucleotide binding%2C ATP binding%3B INVOLVED IN: signal transduction%2C defense response%2C apoptosis%2C innate immune response%3B LOCATED IN: intrinsic to membrane%3B EXPRESSED IN: epidermis%3B CONTAINS InterPro DOMAIN/s: ATPase%2C AAA+ type%2C cor…	.	disease resistance protein (TIR-NBS-LRR class)%2C putative%3B FUNCTIONS IN: transmembrane receptor activity%2C nucleoside-triphosphatase activity%2C nucleotide binding%2C ATP binding%3B INVOLVED IN: signal transduction%2C defense response%2C apoptosis%2C innate immune response%3B LOCATED IN: intrinsic to membrane%3B EXPRESSED IN: epidermis%3B CONTAINS InterPro DOMAIN/s: ATPase%2C AAA+ type%2C cor…	scaffold_2	13828335	13831656	3322	-	scaffold_2	13827872	13828399	528	*	1	-0.024118791	251.4477026	1	6.279705116	0.012212842	0	0.6	1	0	0	0.8	0.2	-2.452671681	-3.439414612	-4.76988279	-1.58546286	1	MODIFIER	NO	NO	1	0	A	B	-2.46064088071173	-3.62732960161472	-0.723701571652774	0	-1.7400726356597238
AL2G28690	AT3G25510	OG0000726	.	protein_coding	disease resistance protein (TIR-NBS-LRR class) family protein	.	disease resistance protein (TIR-NBS-LRR class)%2C putative%3B FUNCTIONS IN: transmembrane receptor activity%2C nucleoside-triphosphatase activity%2C nucleotide binding%2C ATP binding%3B INVOLVED IN: signal transduction%2C defense response%2C apoptosis%2C innate immune response%3B LOCATED IN: intrinsic to membrane%3B EXPRESSED IN: epidermis%3B CONTAINS InterPro DOMAIN/s: ATPase%2C AAA+ type%2C cor…	.	disease resistance protein (TIR-NBS-LRR class)%2C putative%3B FUNCTIONS IN: transmembrane receptor activity%2C nucleoside-triphosphatase activity%2C nucleotide binding%2C ATP binding%3B INVOLVED IN: signal transduction%2C defense response%2C apoptosis%2C innate immune response%3B LOCATED IN: intrinsic to membrane%3B EXPRESSED IN: epidermis%3B CONTAINS InterPro DOMAIN/s: ATPase%2C AAA+ type%2C cor…	scaffold_2	13828335	13831656	3322	-	scaffold_2	13828402	13828770	369	*	0.965529954	-0.030433127	253.0713206	0.968571429	6.046728152	0.012212842	0	0.951428571	0.968571429	0	0.014505495	0.96	0.008571429	-2.452671681	-3.280756436	-5.723859348	0.038827662	21	MODIFIER	MODERATE	HIGH	1	0	A	B	-2.46064088071173	-2.7906966804411	-0.723701571652774	-0.214792619449961	-1.7400726356597238
AL2G28690	AT3G25510	OG0000726	.	protein_coding	disease resistance protein (TIR-NBS-LRR class) family protein	.	disease resistance protein (TIR-NBS-LRR class)%2C putative%3B FUNCTIONS IN: transmembrane receptor activity%2C nucleoside-triphosphatase activity%2C nucleotide binding%2C ATP binding%3B INVOLVED IN: signal transduction%2C defense response%2C apoptosis%2C innate immune response%3B LOCATED IN: intrinsic to membrane%3B EXPRESSED IN: epidermis%3B CONTAINS InterPro DOMAIN/s: ATPase%2C AAA+ type%2C cor…	.	disease resistance protein (TIR-NBS-LRR class)%2C putative%3B FUNCTIONS IN: transmembrane receptor activity%2C nucleoside-triphosphatase activity%2C nucleotide binding%2C ATP binding%3B INVOLVED IN: signal transduction%2C defense response%2C apoptosis%2C innate immune response%3B LOCATED IN: intrinsic to membrane%3B EXPRESSED IN: epidermis%3B CONTAINS InterPro DOMAIN/s: ATPase%2C AAA+ type%2C cor…	scaffold_2	13828335	13831656	3322	-	scaffold_2	13828402	13828770	369	*	0.965529954	-0.030433127	253.0713206	0.968571429	6.046728152	0.012212842	0	0.951428571	0.968571429	0	0.014505495	0.96	0.008571429	-2.452671681	-3.280756436	-5.723859348	0.038827662	22	MODIFIER	MODERATE	HIGH	1	0	A	B	-2.46064088071173	-2.7906966804411	-0.723701571652774	-0.214792619449961	-1.7400726356597238
AL2G28690	AT3G25510	OG0000726	.	protein_coding	disease resistance protein (TIR-NBS-LRR class) family protein	.	disease resistance protein (TIR-NBS-LRR class)%2C putative%3B FUNCTIONS IN: transmembrane receptor activity%2C nucleoside-triphosphatase activity%2C nucleotide binding%2C ATP binding%3B INVOLVED IN: signal transduction%2C defense response%2C apoptosis%2C innate immune response%3B LOCATED IN: intrinsic to membrane%3B EXPRESSED IN: epidermis%3B CONTAINS InterPro DOMAIN/s: ATPase%2C AAA+ type%2C cor…	.	disease resistance protein (TIR-NBS-LRR class)%2C putative%3B FUNCTIONS IN: transmembrane receptor activity%2C nucleoside-triphosphatase activity%2C nucleotide binding%2C ATP binding%3B INVOLVED IN: signal transduction%2C defense response%2C apoptosis%2C innate immune response%3B LOCATED IN: intrinsic to membrane%3B EXPRESSED IN: epidermis%3B CONTAINS InterPro DOMAIN/s: ATPase%2C AAA+ type%2C cor…	scaffold_2	13828335	13831656	3322	-	scaffold_2	13830195	13830512	318	*	0.913500621	-0.030288259	216.5317031	0.930285714	5.672006896	0.012212842	1.5368	0.661714286	0.930285714	0.008	0.04967033	0.796	0.134285714	-2.383060157	-2.896130554	-4.70071949	-0.698897914	51	MODIFIER	MODERATE	NO	1	0	A	B	-2.46064088071173	-2.03012129755599	-0.723701571652774	-0.057828782159605	-1.7400726356597238
AL2G28690	AT3G25510	OG0000726	.	protein_coding	disease resistance protein (TIR-NBS-LRR class) family protein	.	disease resistance protein (TIR-NBS-LRR class)%2C putative%3B FUNCTIONS IN: transmembrane receptor activity%2C nucleoside-triphosphatase activity%2C nucleotide binding%2C ATP binding%3B INVOLVED IN: signal transduction%2C defense response%2C apoptosis%2C innate immune response%3B LOCATED IN: intrinsic to membrane%3B EXPRESSED IN: epidermis%3B CONTAINS InterPro DOMAIN/s: ATPase%2C AAA+ type%2C cor…	.	disease resistance protein (TIR-NBS-LRR class)%2C putative%3B FUNCTIONS IN: transmembrane receptor activity%2C nucleoside-triphosphatase activity%2C nucleotide binding%2C ATP binding%3B INVOLVED IN: signal transduction%2C defense response%2C apoptosis%2C innate immune response%3B LOCATED IN: intrinsic to membrane%3B EXPRESSED IN: epidermis%3B CONTAINS InterPro DOMAIN/s: ATPase%2C AAA+ type%2C cor…	scaffold_2	13828335	13831656	3322	-	scaffold_2	13828402	13828770	369	*	0.965529954	-0.030433127	253.0713206	0.968571429	6.046728152	0.012212842	0	0.951428571	0.968571429	0	0.014505495	0.96	0.008571429	-2.452671681	-3.280756436	-5.723859348	0.038827662	21	MODIFIER	MODERATE	HIGH	1	0	A	B	-2.46064088071173	-2.7906966804411	-0.723701571652774	-0.214792619449961	-1.7400726356597238
AL2G28690	AT3G25510	OG0000726	.	protein_coding	disease resistance protein (TIR-NBS-LRR class) family protein	.	disease resistance protein (TIR-NBS-LRR class)%2C putative%3B FUNCTIONS IN: transmembrane receptor activity%2C nucleoside-triphosphatase activity%2C nucleotide binding%2C ATP binding%3B INVOLVED IN: signal transduction%2C defense response%2C apoptosis%2C innate immune response%3B LOCATED IN: intrinsic to membrane%3B EXPRESSED IN: epidermis%3B CONTAINS InterPro DOMAIN/s: ATPase%2C AAA+ type%2C cor…	.	disease resistance protein (TIR-NBS-LRR class)%2C putative%3B FUNCTIONS IN: transmembrane receptor activity%2C nucleoside-triphosphatase activity%2C nucleotide binding%2C ATP binding%3B INVOLVED IN: signal transduction%2C defense response%2C apoptosis%2C innate immune response%3B LOCATED IN: intrinsic to membrane%3B EXPRESSED IN: epidermis%3B CONTAINS InterPro DOMAIN/s: ATPase%2C AAA+ type%2C cor…	scaffold_2	13828335	13831656	3322	-	scaffold_2	13830195	13830512	318	*	0.913500621	-0.030288259	216.5317031	0.930285714	5.672006896	0.012212842	1.5368	0.661714286	0.930285714	0.008	0.04967033	0.796	0.134285714	-2.383060157	-2.896130554	-4.70071949	-0.698897914	48	MODIFIER	MODERATE	NO	1	0	A	B	-2.46064088071173	-2.03012129755599	-0.723701571652774	-0.057828782159605	-1.7400726356597238
AL2G28690	AT3G25510	OG0000726	.	protein_coding	disease resistance protein (TIR-NBS-LRR class) family protein	.	disease resistance protein (TIR-NBS-LRR class)%2C putative%3B FUNCTIONS IN: transmembrane receptor activity%2C nucleoside-triphosphatase activity%2C nucleotide binding%2C ATP binding%3B INVOLVED IN: signal transduction%2C defense response%2C apoptosis%2C innate immune response%3B LOCATED IN: intrinsic to membrane%3B EXPRESSED IN: epidermis%3B CONTAINS InterPro DOMAIN/s: ATPase%2C AAA+ type%2C cor…	.	disease resistance protein (TIR-NBS-LRR class)%2C putative%3B FUNCTIONS IN: transmembrane receptor activity%2C nucleoside-triphosphatase activity%2C nucleotide binding%2C ATP binding%3B INVOLVED IN: signal transduction%2C defense response%2C apoptosis%2C innate immune response%3B LOCATED IN: intrinsic to membrane%3B EXPRESSED IN: epidermis%3B CONTAINS InterPro DOMAIN/s: ATPase%2C AAA+ type%2C cor…	scaffold_2	13828335	13831656	3322	-	scaffold_2	13830195	13830512	318	*	0.913500621	-0.030288259	216.5317031	0.930285714	5.672006896	0.012212842	1.5368	0.661714286	0.930285714	0.008	0.04967033	0.796	0.134285714	-2.383060157	-2.896130554	-4.70071949	-0.698897914	51	MODIFIER	MODERATE	NO	1	0	A	B	-2.46064088071173	-2.03012129755599	-0.723701571652774	-0.057828782159605	-1.7400726356597238
AL2G28690	AT3G25510	OG0000726	.	protein_coding	disease resistance protein (TIR-NBS-LRR class) family protein	.	disease resistance protein (TIR-NBS-LRR class)%2C putative%3B FUNCTIONS IN: transmembrane receptor activity%2C nucleoside-triphosphatase activity%2C nucleotide binding%2C ATP binding%3B INVOLVED IN: signal transduction%2C defense response%2C apoptosis%2C innate immune response%3B LOCATED IN: intrinsic to membrane%3B EXPRESSED IN: epidermis%3B CONTAINS InterPro DOMAIN/s: ATPase%2C AAA+ type%2C cor…	.	disease resistance protein (TIR-NBS-LRR class)%2C putative%3B FUNCTIONS IN: transmembrane receptor activity%2C nucleoside-triphosphatase activity%2C nucleotide binding%2C ATP binding%3B INVOLVED IN: signal transduction%2C defense response%2C apoptosis%2C innate immune response%3B LOCATED IN: intrinsic to membrane%3B EXPRESSED IN: epidermis%3B CONTAINS InterPro DOMAIN/s: ATPase%2C AAA+ type%2C cor…	scaffold_2	13828335	13831656	3322	-	scaffold_2	13827872	13828399	528	*	1	-0.024118791	251.4477026	1	6.279705116	0.012212842	0	0.6	1	0	0	0.8	0.2	-2.452671681	-3.439414612	-4.76988279	-1.58546286	1	MODIFIER	NO	NO	1	0	A	B	-2.46064088071173	-3.62732960161472	-0.723701571652774	0	-1.7400726356597238
AL2G28690	AT5G11250	OG0000726	.	protein_coding	Disease resistance protein (TIR-NBS-LRR class)	.	Disease resistance protein (TIR-NBS-LRR class)%3B FUNCTIONS IN: transmembrane receptor activity%2C ATP binding%3B INVOLVED IN: signal transduction%2C apoptosis%2C defense response%2C innate immune response%3B LOCATED IN: intrinsic to membrane%2C chloroplast%3B EXPRESSED IN: 20 plant structures%3B EXPRESSED DURING: 13 growth stages%3B CONTAINS InterPro DOMAIN/s: NB-ARC (InterPro:IPR002182)%2C Leuc…	.	Disease resistance protein (TIR-NBS-LRR class)%3B FUNCTIONS IN: transmembrane receptor activity%2C ATP binding%3B INVOLVED IN: signal transduction%2C apoptosis%2C defense response%2C innate immune response%3B LOCATED IN: intrinsic to membrane%2C chloroplast%3B EXPRESSED IN: 20 plant structures%3B EXPRESSED DURING: 13 growth stages%3B CONTAINS InterPro DOMAIN/s: NB-ARC (InterPro:IPR002182)%2C Leuc…	scaffold_2	13828335	13831656	3322	-	scaffold_2	13830195	13830512	318	*	0.913500621	-0.030288259	216.5317031	0.930285714	5.672006896	0.012212842	1.5368	0.661714286	0.930285714	0.008	0.04967033	0.796	0.134285714	-2.383060157	-2.896130554	-4.70071949	-0.698897914	48	MODIFIER	MODERATE	NO	1	0	A	B	-2.46064088071173	-2.03012129755599	-0.723701571652774	-0.057828782159605	-1.7400726356597238
AL2G28690	AT5G11250	OG0000726	.	protein_coding	Disease resistance protein (TIR-NBS-LRR class)	.	Disease resistance protein (TIR-NBS-LRR class)%3B FUNCTIONS IN: transmembrane receptor activity%2C ATP binding%3B INVOLVED IN: signal transduction%2C apoptosis%2C defense response%2C innate immune response%3B LOCATED IN: intrinsic to membrane%2C chloroplast%3B EXPRESSED IN: 20 plant structures%3B EXPRESSED DURING: 13 growth stages%3B CONTAINS InterPro DOMAIN/s: NB-ARC (InterPro:IPR002182)%2C Leuc…	.	Disease resistance protein (TIR-NBS-LRR class)%3B FUNCTIONS IN: transmembrane receptor activity%2C ATP binding%3B INVOLVED IN: signal transduction%2C apoptosis%2C defense response%2C innate immune response%3B LOCATED IN: intrinsic to membrane%2C chloroplast%3B EXPRESSED IN: 20 plant structures%3B EXPRESSED DURING: 13 growth stages%3B CONTAINS InterPro DOMAIN/s: NB-ARC (InterPro:IPR002182)%2C Leuc…	scaffold_2	13828335	13831656	3322	-	scaffold_2	13830195	13830512	318	*	0.913500621	-0.030288259	216.5317031	0.930285714	5.672006896	0.012212842	1.5368	0.661714286	0.930285714	0.008	0.04967033	0.796	0.134285714	-2.383060157	-2.896130554	-4.70071949	-0.698897914	48	MODIFIER	MODERATE	NO	1	0	A	B	-2.46064088071173	-2.03012129755599	-0.723701571652774	-0.057828782159605	-1.7400726356597238
AL2G28690	AT5G11250	OG0000726	.	protein_coding	Disease resistance protein (TIR-NBS-LRR class)	.	Disease resistance protein (TIR-NBS-LRR class)%3B FUNCTIONS IN: transmembrane receptor activity%2C ATP binding%3B INVOLVED IN: signal transduction%2C apoptosis%2C defense response%2C innate immune response%3B LOCATED IN: intrinsic to membrane%2C chloroplast%3B EXPRESSED IN: 20 plant structures%3B EXPRESSED DURING: 13 growth stages%3B CONTAINS InterPro DOMAIN/s: NB-ARC (InterPro:IPR002182)%2C Leuc…	.	Disease resistance protein (TIR-NBS-LRR class)%3B FUNCTIONS IN: transmembrane receptor activity%2C ATP binding%3B INVOLVED IN: signal transduction%2C apoptosis%2C defense response%2C innate immune response%3B LOCATED IN: intrinsic to membrane%2C chloroplast%3B EXPRESSED IN: 20 plant structures%3B EXPRESSED DURING: 13 growth stages%3B CONTAINS InterPro DOMAIN/s: NB-ARC (InterPro:IPR002182)%2C Leuc…	scaffold_2	13828335	13831656	3322	-	scaffold_2	13830195	13830512	318	*	0.913500621	-0.030288259	216.5317031	0.930285714	5.672006896	0.012212842	1.5368	0.661714286	0.930285714	0.008	0.04967033	0.796	0.134285714	-2.383060157	-2.896130554	-4.70071949	-0.698897914	51	MODIFIER	MODERATE	NO	1	0	A	B	-2.46064088071173	-2.03012129755599	-0.723701571652774	-0.057828782159605	-1.7400726356597238
AL2G28690	AT5G11250	OG0000726	.	protein_coding	Disease resistance protein (TIR-NBS-LRR class)	.	Disease resistance protein (TIR-NBS-LRR class)%3B FUNCTIONS IN: transmembrane receptor activity%2C ATP binding%3B INVOLVED IN: signal transduction%2C apoptosis%2C defense response%2C innate immune response%3B LOCATED IN: intrinsic to membrane%2C chloroplast%3B EXPRESSED IN: 20 plant structures%3B EXPRESSED DURING: 13 growth stages%3B CONTAINS InterPro DOMAIN/s: NB-ARC (InterPro:IPR002182)%2C Leuc…	.	Disease resistance protein (TIR-NBS-LRR class)%3B FUNCTIONS IN: transmembrane receptor activity%2C ATP binding%3B INVOLVED IN: signal transduction%2C apoptosis%2C defense response%2C innate immune response%3B LOCATED IN: intrinsic to membrane%2C chloroplast%3B EXPRESSED IN: 20 plant structures%3B EXPRESSED DURING: 13 growth stages%3B CONTAINS InterPro DOMAIN/s: NB-ARC (InterPro:IPR002182)%2C Leuc…	scaffold_2	13828335	13831656	3322	-	scaffold_2	13828402	13828770	369	*	0.965529954	-0.030433127	253.0713206	0.968571429	6.046728152	0.012212842	0	0.951428571	0.968571429	0	0.014505495	0.96	0.008571429	-2.452671681	-3.280756436	-5.723859348	0.038827662	22	MODIFIER	MODERATE	HIGH	1	0	A	B	-2.46064088071173	-2.7906966804411	-0.723701571652774	-0.214792619449961	-1.7400726356597238
AL2G28690	AT5G11250	OG0000726	.	protein_coding	Disease resistance protein (TIR-NBS-LRR class)	.	Disease resistance protein (TIR-NBS-LRR class)%3B FUNCTIONS IN: transmembrane receptor activity%2C ATP binding%3B INVOLVED IN: signal transduction%2C apoptosis%2C defense response%2C innate immune response%3B LOCATED IN: intrinsic to membrane%2C chloroplast%3B EXPRESSED IN: 20 plant structures%3B EXPRESSED DURING: 13 growth stages%3B CONTAINS InterPro DOMAIN/s: NB-ARC (InterPro:IPR002182)%2C Leuc…	.	Disease resistance protein (TIR-NBS-LRR class)%3B FUNCTIONS IN: transmembrane receptor activity%2C ATP binding%3B INVOLVED IN: signal transduction%2C apoptosis%2C defense response%2C innate immune response%3B LOCATED IN: intrinsic to membrane%2C chloroplast%3B EXPRESSED IN: 20 plant structures%3B EXPRESSED DURING: 13 growth stages%3B CONTAINS InterPro DOMAIN/s: NB-ARC (InterPro:IPR002182)%2C Leuc…	scaffold_2	13828335	13831656	3322	-	scaffold_2	13830195	13830512	318	*	0.913500621	-0.030288259	216.5317031	0.930285714	5.672006896	0.012212842	1.5368	0.661714286	0.930285714	0.008	0.04967033	0.796	0.134285714	-2.383060157	-2.896130554	-4.70071949	-0.698897914	51	MODIFIER	MODERATE	NO	1	0	A	B	-2.46064088071173	-2.03012129755599	-0.723701571652774	-0.057828782159605	-1.7400726356597238
AL2G28690	AT5G11250	OG0000726	.	protein_coding	Disease resistance protein (TIR-NBS-LRR class)	.	Disease resistance protein (TIR-NBS-LRR class)%3B FUNCTIONS IN: transmembrane receptor activity%2C ATP binding%3B INVOLVED IN: signal transduction%2C apoptosis%2C defense response%2C innate immune response%3B LOCATED IN: intrinsic to membrane%2C chloroplast%3B EXPRESSED IN: 20 plant structures%3B EXPRESSED DURING: 13 growth stages%3B CONTAINS InterPro DOMAIN/s: NB-ARC (InterPro:IPR002182)%2C Leuc…	.	Disease resistance protein (TIR-NBS-LRR class)%3B FUNCTIONS IN: transmembrane receptor activity%2C ATP binding%3B INVOLVED IN: signal transduction%2C apoptosis%2C defense response%2C innate immune response%3B LOCATED IN: intrinsic to membrane%2C chloroplast%3B EXPRESSED IN: 20 plant structures%3B EXPRESSED DURING: 13 growth stages%3B CONTAINS InterPro DOMAIN/s: NB-ARC (InterPro:IPR002182)%2C Leuc…	scaffold_2	13828335	13831656	3322	-	scaffold_2	13827872	13828399	528	*	1	-0.024118791	251.4477026	1	6.279705116	0.012212842	0	0.6	1	0	0	0.8	0.2	-2.452671681	-3.439414612	-4.76988279	-1.58546286	1	MODIFIER	NO	NO	1	0	A	B	-2.46064088071173	-3.62732960161472	-0.723701571652774	0	-1.7400726356597238
AL2G28690	AT5G11250	OG0000726	.	protein_coding	Disease resistance protein (TIR-NBS-LRR class)	.	Disease resistance protein (TIR-NBS-LRR class)%3B FUNCTIONS IN: transmembrane receptor activity%2C ATP binding%3B INVOLVED IN: signal transduction%2C apoptosis%2C defense response%2C innate immune response%3B LOCATED IN: intrinsic to membrane%2C chloroplast%3B EXPRESSED IN: 20 plant structures%3B EXPRESSED DURING: 13 growth stages%3B CONTAINS InterPro DOMAIN/s: NB-ARC (InterPro:IPR002182)%2C Leuc…	.	Disease resistance protein (TIR-NBS-LRR class)%3B FUNCTIONS IN: transmembrane receptor activity%2C ATP binding%3B INVOLVED IN: signal transduction%2C apoptosis%2C defense response%2C innate immune response%3B LOCATED IN: intrinsic to membrane%2C chloroplast%3B EXPRESSED IN: 20 plant structures%3B EXPRESSED DURING: 13 growth stages%3B CONTAINS InterPro DOMAIN/s: NB-ARC (InterPro:IPR002182)%2C Leuc…	scaffold_2	13828335	13831656	3322	-	scaffold_2	13830195	13830512	318	*	0.913500621	-0.030288259	216.5317031	0.930285714	5.672006896	0.012212842	1.5368	0.661714286	0.930285714	0.008	0.04967033	0.796	0.134285714	-2.383060157	-2.896130554	-4.70071949	-0.698897914	48	MODIFIER	MODERATE	NO	1	0	A	B	-2.46064088071173	-2.03012129755599	-0.723701571652774	-0.057828782159605	-1.7400726356597238
AL2G28690	AT5G11250	OG0000726	.	protein_coding	Disease resistance protein (TIR-NBS-LRR class)	.	Disease resistance protein (TIR-NBS-LRR class)%3B FUNCTIONS IN: transmembrane receptor activity%2C ATP binding%3B INVOLVED IN: signal transduction%2C apoptosis%2C defense response%2C innate immune response%3B LOCATED IN: intrinsic to membrane%2C chloroplast%3B EXPRESSED IN: 20 plant structures%3B EXPRESSED DURING: 13 growth stages%3B CONTAINS InterPro DOMAIN/s: NB-ARC (InterPro:IPR002182)%2C Leuc…	.	Disease resistance protein (TIR-NBS-LRR class)%3B FUNCTIONS IN: transmembrane receptor activity%2C ATP binding%3B INVOLVED IN: signal transduction%2C apoptosis%2C defense response%2C innate immune response%3B LOCATED IN: intrinsic to membrane%2C chloroplast%3B EXPRESSED IN: 20 plant structures%3B EXPRESSED DURING: 13 growth stages%3B CONTAINS InterPro DOMAIN/s: NB-ARC (InterPro:IPR002182)%2C Leuc…	scaffold_2	13828335	13831656	3322	-	scaffold_2	13828402	13828770	369	*	0.965529954	-0.030433127	253.0713206	0.968571429	6.046728152	0.012212842	0	0.951428571	0.968571429	0	0.014505495	0.96	0.008571429	-2.452671681	-3.280756436	-5.723859348	0.038827662	22	MODIFIER	MODERATE	HIGH	1	0	A	B	-2.46064088071173	-2.7906966804411	-0.723701571652774	-0.214792619449961	-1.7400726356597238
AL2G28690	AT5G11250	OG0000726	.	protein_coding	Disease resistance protein (TIR-NBS-LRR class)	.	Disease resistance protein (TIR-NBS-LRR class)%3B FUNCTIONS IN: transmembrane receptor activity%2C ATP binding%3B INVOLVED IN: signal transduction%2C apoptosis%2C defense response%2C innate immune response%3B LOCATED IN: intrinsic to membrane%2C chloroplast%3B EXPRESSED IN: 20 plant structures%3B EXPRESSED DURING: 13 growth stages%3B CONTAINS InterPro DOMAIN/s: NB-ARC (InterPro:IPR002182)%2C Leuc…	.	Disease resistance protein (TIR-NBS-LRR class)%3B FUNCTIONS IN: transmembrane receptor activity%2C ATP binding%3B INVOLVED IN: signal transduction%2C apoptosis%2C defense response%2C innate immune response%3B LOCATED IN: intrinsic to membrane%2C chloroplast%3B EXPRESSED IN: 20 plant structures%3B EXPRESSED DURING: 13 growth stages%3B CONTAINS InterPro DOMAIN/s: NB-ARC (InterPro:IPR002182)%2C Leuc…	scaffold_2	13828335	13831656	3322	-	scaffold_2	13828402	13828770	369	*	0.965529954	-0.030433127	253.0713206	0.968571429	6.046728152	0.012212842	0	0.951428571	0.968571429	0	0.014505495	0.96	0.008571429	-2.452671681	-3.280756436	-5.723859348	0.038827662	22	MODIFIER	MODERATE	HIGH	1	0	A	B	-2.46064088071173	-2.7906966804411	-0.723701571652774	-0.214792619449961	-1.7400726356597238
AL2G28690	AT5G11250	OG0000726	.	protein_coding	Disease resistance protein (TIR-NBS-LRR class)	.	Disease resistance protein (TIR-NBS-LRR class)%3B FUNCTIONS IN: transmembrane receptor activity%2C ATP binding%3B INVOLVED IN: signal transduction%2C apoptosis%2C defense response%2C innate immune response%3B LOCATED IN: intrinsic to membrane%2C chloroplast%3B EXPRESSED IN: 20 plant structures%3B EXPRESSED DURING: 13 growth stages%3B CONTAINS InterPro DOMAIN/s: NB-ARC (InterPro:IPR002182)%2C Leuc…	.	Disease resistance protein (TIR-NBS-LRR class)%3B FUNCTIONS IN: transmembrane receptor activity%2C ATP binding%3B INVOLVED IN: signal transduction%2C apoptosis%2C defense response%2C innate immune response%3B LOCATED IN: intrinsic to membrane%2C chloroplast%3B EXPRESSED IN: 20 plant structures%3B EXPRESSED DURING: 13 growth stages%3B CONTAINS InterPro DOMAIN/s: NB-ARC (InterPro:IPR002182)%2C Leuc…	scaffold_2	13828335	13831656	3322	-	scaffold_2	13828402	13828770	369	*	0.965529954	-0.030433127	253.0713206	0.968571429	6.046728152	0.012212842	0	0.951428571	0.968571429	0	0.014505495	0.96	0.008571429	-2.452671681	-3.280756436	-5.723859348	0.038827662	21	MODIFIER	MODERATE	HIGH	1	0	A	B	-2.46064088071173	-2.7906966804411	-0.723701571652774	-0.214792619449961	-1.7400726356597238
AL2G28690	AT5G11250	OG0000726	.	protein_coding	Disease resistance protein (TIR-NBS-LRR class)	.	Disease resistance protein (TIR-NBS-LRR class)%3B FUNCTIONS IN: transmembrane receptor activity%2C ATP binding%3B INVOLVED IN: signal transduction%2C apoptosis%2C defense response%2C innate immune response%3B LOCATED IN: intrinsic to membrane%2C chloroplast%3B EXPRESSED IN: 20 plant structures%3B EXPRESSED DURING: 13 growth stages%3B CONTAINS InterPro DOMAIN/s: NB-ARC (InterPro:IPR002182)%2C Leuc…	.	Disease resistance protein (TIR-NBS-LRR class)%3B FUNCTIONS IN: transmembrane receptor activity%2C ATP binding%3B INVOLVED IN: signal transduction%2C apoptosis%2C defense response%2C innate immune response%3B LOCATED IN: intrinsic to membrane%2C chloroplast%3B EXPRESSED IN: 20 plant structures%3B EXPRESSED DURING: 13 growth stages%3B CONTAINS InterPro DOMAIN/s: NB-ARC (InterPro:IPR002182)%2C Leuc…	scaffold_2	13828335	13831656	3322	-	scaffold_2	13828402	13828770	369	*	0.965529954	-0.030433127	253.0713206	0.968571429	6.046728152	0.012212842	0	0.951428571	0.968571429	0	0.014505495	0.96	0.008571429	-2.452671681	-3.280756436	-5.723859348	0.038827662	21	MODIFIER	MODERATE	HIGH	1	0	A	B	-2.46064088071173	-2.7906966804411	-0.723701571652774	-0.214792619449961	-1.7400726356597238
AL2G28690	AT5G11250	OG0000726	.	protein_coding	Disease resistance protein (TIR-NBS-LRR class)	.	Disease resistance protein (TIR-NBS-LRR class)%3B FUNCTIONS IN: transmembrane receptor activity%2C ATP binding%3B INVOLVED IN: signal transduction%2C apoptosis%2C defense response%2C innate immune response%3B LOCATED IN: intrinsic to membrane%2C chloroplast%3B EXPRESSED IN: 20 plant structures%3B EXPRESSED DURING: 13 growth stages%3B CONTAINS InterPro DOMAIN/s: NB-ARC (InterPro:IPR002182)%2C Leuc…	.	Disease resistance protein (TIR-NBS-LRR class)%3B FUNCTIONS IN: transmembrane receptor activity%2C ATP binding%3B INVOLVED IN: signal transduction%2C apoptosis%2C defense response%2C innate immune response%3B LOCATED IN: intrinsic to membrane%2C chloroplast%3B EXPRESSED IN: 20 plant structures%3B EXPRESSED DURING: 13 growth stages%3B CONTAINS InterPro DOMAIN/s: NB-ARC (InterPro:IPR002182)%2C Leuc…	scaffold_2	13828335	13831656	3322	-	scaffold_2	13827872	13828399	528	*	1	-0.024118791	251.4477026	1	6.279705116	0.012212842	0	0.6	1	0	0	0.8	0.2	-2.452671681	-3.439414612	-4.76988279	-1.58546286	1	MODIFIER	NO	NO	1	0	A	B	-2.46064088071173	-3.62732960161472	-0.723701571652774	0	-1.7400726356597238
AL2G28690	AT5G11250	OG0000726	.	protein_coding	Disease resistance protein (TIR-NBS-LRR class)	.	Disease resistance protein (TIR-NBS-LRR class)%3B FUNCTIONS IN: transmembrane receptor activity%2C ATP binding%3B INVOLVED IN: signal transduction%2C apoptosis%2C defense response%2C innate immune response%3B LOCATED IN: intrinsic to membrane%2C chloroplast%3B EXPRESSED IN: 20 plant structures%3B EXPRESSED DURING: 13 growth stages%3B CONTAINS InterPro DOMAIN/s: NB-ARC (InterPro:IPR002182)%2C Leuc…	.	Disease resistance protein (TIR-NBS-LRR class)%3B FUNCTIONS IN: transmembrane receptor activity%2C ATP binding%3B INVOLVED IN: signal transduction%2C apoptosis%2C defense response%2C innate immune response%3B LOCATED IN: intrinsic to membrane%2C chloroplast%3B EXPRESSED IN: 20 plant structures%3B EXPRESSED DURING: 13 growth stages%3B CONTAINS InterPro DOMAIN/s: NB-ARC (InterPro:IPR002182)%2C Leuc…	scaffold_2	13828335	13831656	3322	-	scaffold_2	13827872	13828399	528	*	1	-0.024118791	251.4477026	1	6.279705116	0.012212842	0	0.6	1	0	0	0.8	0.2	-2.452671681	-3.439414612	-4.76988279	-1.58546286	1	MODIFIER	NO	NO	1	0	A	B	-2.46064088071173	-3.62732960161472	-0.723701571652774	0	-1.7400726356597238
AL2G28690	AT5G11250	OG0000726	.	protein_coding	Disease resistance protein (TIR-NBS-LRR class)	.	Disease resistance protein (TIR-NBS-LRR class)%3B FUNCTIONS IN: transmembrane receptor activity%2C ATP binding%3B INVOLVED IN: signal transduction%2C apoptosis%2C defense response%2C innate immune response%3B LOCATED IN: intrinsic to membrane%2C chloroplast%3B EXPRESSED IN: 20 plant structures%3B EXPRESSED DURING: 13 growth stages%3B CONTAINS InterPro DOMAIN/s: NB-ARC (InterPro:IPR002182)%2C Leuc…	.	Disease resistance protein (TIR-NBS-LRR class)%3B FUNCTIONS IN: transmembrane receptor activity%2C ATP binding%3B INVOLVED IN: signal transduction%2C apoptosis%2C defense response%2C innate immune response%3B LOCATED IN: intrinsic to membrane%2C chloroplast%3B EXPRESSED IN: 20 plant structures%3B EXPRESSED DURING: 13 growth stages%3B CONTAINS InterPro DOMAIN/s: NB-ARC (InterPro:IPR002182)%2C Leuc…	scaffold_2	13828335	13831656	3322	-	scaffold_2	13828402	13828770	369	*	0.965529954	-0.030433127	253.0713206	0.968571429	6.046728152	0.012212842	0	0.951428571	0.968571429	0	0.014505495	0.96	0.008571429	-2.452671681	-3.280756436	-5.723859348	0.038827662	21	MODIFIER	MODERATE	HIGH	1	0	A	B	-2.46064088071173	-2.7906966804411	-0.723701571652774	-0.214792619449961	-1.7400726356597238
AL2G28690	AT5G11250	OG0000726	.	protein_coding	Disease resistance protein (TIR-NBS-LRR class)	.	Disease resistance protein (TIR-NBS-LRR class)%3B FUNCTIONS IN: transmembrane receptor activity%2C ATP binding%3B INVOLVED IN: signal transduction%2C apoptosis%2C defense response%2C innate immune response%3B LOCATED IN: intrinsic to membrane%2C chloroplast%3B EXPRESSED IN: 20 plant structures%3B EXPRESSED DURING: 13 growth stages%3B CONTAINS InterPro DOMAIN/s: NB-ARC (InterPro:IPR002182)%2C Leuc…	.	Disease resistance protein (TIR-NBS-LRR class)%3B FUNCTIONS IN: transmembrane receptor activity%2C ATP binding%3B INVOLVED IN: signal transduction%2C apoptosis%2C defense response%2C innate immune response%3B LOCATED IN: intrinsic to membrane%2C chloroplast%3B EXPRESSED IN: 20 plant structures%3B EXPRESSED DURING: 13 growth stages%3B CONTAINS InterPro DOMAIN/s: NB-ARC (InterPro:IPR002182)%2C Leuc…	scaffold_2	13828335	13831656	3322	-	scaffold_2	13828402	13828770	369	*	0.965529954	-0.030433127	253.0713206	0.968571429	6.046728152	0.012212842	0	0.951428571	0.968571429	0	0.014505495	0.96	0.008571429	-2.452671681	-3.280756436	-5.723859348	0.038827662	22	MODIFIER	MODERATE	HIGH	1	0	A	B	-2.46064088071173	-2.7906966804411	-0.723701571652774	-0.214792619449961	-1.7400726356597238
AL2G28690	AT5G11250	OG0000726	.	protein_coding	Disease resistance protein (TIR-NBS-LRR class)	.	Disease resistance protein (TIR-NBS-LRR class)%3B FUNCTIONS IN: transmembrane receptor activity%2C ATP binding%3B INVOLVED IN: signal transduction%2C apoptosis%2C defense response%2C innate immune response%3B LOCATED IN: intrinsic to membrane%2C chloroplast%3B EXPRESSED IN: 20 plant structures%3B EXPRESSED DURING: 13 growth stages%3B CONTAINS InterPro DOMAIN/s: NB-ARC (InterPro:IPR002182)%2C Leuc…	.	Disease resistance protein (TIR-NBS-LRR class)%3B FUNCTIONS IN: transmembrane receptor activity%2C ATP binding%3B INVOLVED IN: signal transduction%2C apoptosis%2C defense response%2C innate immune response%3B LOCATED IN: intrinsic to membrane%2C chloroplast%3B EXPRESSED IN: 20 plant structures%3B EXPRESSED DURING: 13 growth stages%3B CONTAINS InterPro DOMAIN/s: NB-ARC (InterPro:IPR002182)%2C Leuc…	scaffold_2	13828335	13831656	3322	-	scaffold_2	13830195	13830512	318	*	0.913500621	-0.030288259	216.5317031	0.930285714	5.672006896	0.012212842	1.5368	0.661714286	0.930285714	0.008	0.04967033	0.796	0.134285714	-2.383060157	-2.896130554	-4.70071949	-0.698897914	51	MODIFIER	MODERATE	NO	1	0	A	B	-2.46064088071173	-2.03012129755599	-0.723701571652774	-0.057828782159605	-1.7400726356597238
AL2G28690	AT5G11250	OG0000726	.	protein_coding	Disease resistance protein (TIR-NBS-LRR class)	.	Disease resistance protein (TIR-NBS-LRR class)%3B FUNCTIONS IN: transmembrane receptor activity%2C ATP binding%3B INVOLVED IN: signal transduction%2C apoptosis%2C defense response%2C innate immune response%3B LOCATED IN: intrinsic to membrane%2C chloroplast%3B EXPRESSED IN: 20 plant structures%3B EXPRESSED DURING: 13 growth stages%3B CONTAINS InterPro DOMAIN/s: NB-ARC (InterPro:IPR002182)%2C Leuc…	.	Disease resistance protein (TIR-NBS-LRR class)%3B FUNCTIONS IN: transmembrane receptor activity%2C ATP binding%3B INVOLVED IN: signal transduction%2C apoptosis%2C defense response%2C innate immune response%3B LOCATED IN: intrinsic to membrane%2C chloroplast%3B EXPRESSED IN: 20 plant structures%3B EXPRESSED DURING: 13 growth stages%3B CONTAINS InterPro DOMAIN/s: NB-ARC (InterPro:IPR002182)%2C Leuc…	scaffold_2	13828335	13831656	3322	-	scaffold_2	13828402	13828770	369	*	0.965529954	-0.030433127	253.0713206	0.968571429	6.046728152	0.012212842	0	0.951428571	0.968571429	0	0.014505495	0.96	0.008571429	-2.452671681	-3.280756436	-5.723859348	0.038827662	21	MODIFIER	MODERATE	HIGH	1	0	A	B	-2.46064088071173	-2.7906966804411	-0.723701571652774	-0.214792619449961	-1.7400726356597238
AL2G28690	AT5G11250	OG0000726	.	protein_coding	Disease resistance protein (TIR-NBS-LRR class)	.	Disease resistance protein (TIR-NBS-LRR class)%3B FUNCTIONS IN: transmembrane receptor activity%2C ATP binding%3B INVOLVED IN: signal transduction%2C apoptosis%2C defense response%2C innate immune response%3B LOCATED IN: intrinsic to membrane%2C chloroplast%3B EXPRESSED IN: 20 plant structures%3B EXPRESSED DURING: 13 growth stages%3B CONTAINS InterPro DOMAIN/s: NB-ARC (InterPro:IPR002182)%2C Leuc…	.	Disease resistance protein (TIR-NBS-LRR class)%3B FUNCTIONS IN: transmembrane receptor activity%2C ATP binding%3B INVOLVED IN: signal transduction%2C apoptosis%2C defense response%2C innate immune response%3B LOCATED IN: intrinsic to membrane%2C chloroplast%3B EXPRESSED IN: 20 plant structures%3B EXPRESSED DURING: 13 growth stages%3B CONTAINS InterPro DOMAIN/s: NB-ARC (InterPro:IPR002182)%2C Leuc…	scaffold_2	13828335	13831656	3322	-	scaffold_2	13830195	13830512	318	*	0.913500621	-0.030288259	216.5317031	0.930285714	5.672006896	0.012212842	1.5368	0.661714286	0.930285714	0.008	0.04967033	0.796	0.134285714	-2.383060157	-2.896130554	-4.70071949	-0.698897914	48	MODIFIER	MODERATE	NO	1	0	A	B	-2.46064088071173	-2.03012129755599	-0.723701571652774	-0.057828782159605	-1.7400726356597238
AL2G28690	AT5G11250	OG0000726	.	protein_coding	Disease resistance protein (TIR-NBS-LRR class)	.	Disease resistance protein (TIR-NBS-LRR class)%3B FUNCTIONS IN: transmembrane receptor activity%2C ATP binding%3B INVOLVED IN: signal transduction%2C apoptosis%2C defense response%2C innate immune response%3B LOCATED IN: intrinsic to membrane%2C chloroplast%3B EXPRESSED IN: 20 plant structures%3B EXPRESSED DURING: 13 growth stages%3B CONTAINS InterPro DOMAIN/s: NB-ARC (InterPro:IPR002182)%2C Leuc…	.	Disease resistance protein (TIR-NBS-LRR class)%3B FUNCTIONS IN: transmembrane receptor activity%2C ATP binding%3B INVOLVED IN: signal transduction%2C apoptosis%2C defense response%2C innate immune response%3B LOCATED IN: intrinsic to membrane%2C chloroplast%3B EXPRESSED IN: 20 plant structures%3B EXPRESSED DURING: 13 growth stages%3B CONTAINS InterPro DOMAIN/s: NB-ARC (InterPro:IPR002182)%2C Leuc…	scaffold_2	13828335	13831656	3322	-	scaffold_2	13830195	13830512	318	*	0.913500621	-0.030288259	216.5317031	0.930285714	5.672006896	0.012212842	1.5368	0.661714286	0.930285714	0.008	0.04967033	0.796	0.134285714	-2.383060157	-2.896130554	-4.70071949	-0.698897914	51	MODIFIER	MODERATE	NO	1	0	A	B	-2.46064088071173	-2.03012129755599	-0.723701571652774	-0.057828782159605	-1.7400726356597238
AL2G28690	AT5G11250	OG0000726	.	protein_coding	Disease resistance protein (TIR-NBS-LRR class)	.	Disease resistance protein (TIR-NBS-LRR class)%3B FUNCTIONS IN: transmembrane receptor activity%2C ATP binding%3B INVOLVED IN: signal transduction%2C apoptosis%2C defense response%2C innate immune response%3B LOCATED IN: intrinsic to membrane%2C chloroplast%3B EXPRESSED IN: 20 plant structures%3B EXPRESSED DURING: 13 growth stages%3B CONTAINS InterPro DOMAIN/s: NB-ARC (InterPro:IPR002182)%2C Leuc…	.	Disease resistance protein (TIR-NBS-LRR class)%3B FUNCTIONS IN: transmembrane receptor activity%2C ATP binding%3B INVOLVED IN: signal transduction%2C apoptosis%2C defense response%2C innate immune response%3B LOCATED IN: intrinsic to membrane%2C chloroplast%3B EXPRESSED IN: 20 plant structures%3B EXPRESSED DURING: 13 growth stages%3B CONTAINS InterPro DOMAIN/s: NB-ARC (InterPro:IPR002182)%2C Leuc…	scaffold_2	13828335	13831656	3322	-	scaffold_2	13827872	13828399	528	*	1	-0.024118791	251.4477026	1	6.279705116	0.012212842	0	0.6	1	0	0	0.8	0.2	-2.452671681	-3.439414612	-4.76988279	-1.58546286	1	MODIFIER	NO	NO	1	0	A	B	-2.46064088071173	-3.62732960161472	-0.723701571652774	0	-1.7400726356597238
AL2G31400	AT1G71820	OG0006100	SEC6	protein_coding	SEC6	.	SEC6%3B FUNCTIONS IN: molecular_function unknown%3B INVOLVED IN: pollen germination%2C pollen tube growth%3B LOCATED IN: cytosol%2C plasma membrane%2C exocyst%3B EXPRESSED IN: 24 plant structures%3B EXPRESSED DURING: 15 growth stages%3B CONTAINS InterPro DOMAIN/s: Exocyst complex component Sec6 (InterPro:IPR010326)%3B Has 534 Blast hits to 527 proteins in 171 species: Archae - 3%3B Bacteria - 6%3…	Encodes a member of the exocyst complex gene family. The exocyst is a protein complex involved in tethering vesicles to the plasma membrane during regulated or polarized secretion.	SEC6%3B FUNCTIONS IN: molecular_function unknown%3B INVOLVED IN: pollen germination%2C pollen tube growth%3B LOCATED IN: cytosol%2C plasma membrane%2C exocyst%3B EXPRESSED IN: 24 plant structures%3B EXPRESSED DURING: 15 growth stages%3B CONTAINS InterPro DOMAIN/s: Exocyst complex component Sec6 (InterPro:IPR010326)%3B Has 534 Blast hits to 527 proteins in 171 species: Archae - 3%3B Bacteria - 6%3…	scaffold_2	15048581	15055962	7382	+	scaffold_2	15052278	15053376	1099	*	0.137382937	-0.298516179	282.9252904	0.55	0.802672001	0.058528709	2.573	0.323428571	0.364	0.459789474	0.417142857	0.612	0.288571429	1.548159108	1.123209907	-1.044604331	0.783024515	123	MODIFIER		NO	NO	NO	B	B	1.21836417664275	1.03753274674729	-1.41142967336958	0.677422876726793	1.938932421694756
AL2G33400	AT1G73620	OG0001721	.	protein_coding	Pathogenesis-related thaumatin superfamily protein	.	Pathogenesis-related thaumatin superfamily protein%3B INVOLVED IN: response to other organism%3B LOCATED IN: membrane%3B EXPRESSED IN: 17 plant structures%3B EXPRESSED DURING: 9 growth stages%3B CONTAINS InterPro DOMAIN/s: Thaumatin%2C conserved site (InterPro:IPR017949)%2C Thaumatin%2C pathogenesis-related (InterPro:IPR001938)%3B BEST Arabidopsis thaliana protein match is: Pathogenesis-related t…	.	Pathogenesis-related thaumatin superfamily protein%3B INVOLVED IN: response to other organism%3B LOCATED IN: membrane%3B EXPRESSED IN: 17 plant structures%3B EXPRESSED DURING: 9 growth stages%3B CONTAINS InterPro DOMAIN/s: Thaumatin%2C conserved site (InterPro:IPR017949)%2C Thaumatin%2C pathogenesis-related (InterPro:IPR001938)%3B BEST Arabidopsis thaliana protein match is: Pathogenesis-related t…	scaffold_2	15917802	15919235	1434	+	scaffold_2	15917727	15918500	774	*	0.668184197	-0.035095105	302.1243052	0.821428571	3.57211122	0.058757563	0	0.548857143	0.807142857	0.1	0.263736264	0.806	0.257142857	-1.582527622	-0.554720501	-4.23923333	-0.097069155	28	MODIFIER	MODERATE	NO	NO	NO	B	A	-1.81374127679645	-0.164176358211182	-6.85612015249996	-0.330450183769167	-1.093173031744444
AL2G33400	AT1G73620	OG0001721	.	protein_coding	Pathogenesis-related thaumatin superfamily protein	.	Pathogenesis-related thaumatin superfamily protein%3B INVOLVED IN: response to other organism%3B LOCATED IN: membrane%3B EXPRESSED IN: 17 plant structures%3B EXPRESSED DURING: 9 growth stages%3B CONTAINS InterPro DOMAIN/s: Thaumatin%2C conserved site (InterPro:IPR017949)%2C Thaumatin%2C pathogenesis-related (InterPro:IPR001938)%3B BEST Arabidopsis thaliana protein match is: Pathogenesis-related t…	.	Pathogenesis-related thaumatin superfamily protein%3B INVOLVED IN: response to other organism%3B LOCATED IN: membrane%3B EXPRESSED IN: 17 plant structures%3B EXPRESSED DURING: 9 growth stages%3B CONTAINS InterPro DOMAIN/s: Thaumatin%2C conserved site (InterPro:IPR017949)%2C Thaumatin%2C pathogenesis-related (InterPro:IPR001938)%3B BEST Arabidopsis thaliana protein match is: Pathogenesis-related t…	scaffold_2	15917802	15919235	1434	+	scaffold_2	15917727	15918500	774	*	0.668184197	-0.035095105	302.1243052	0.821428571	3.57211122	0.058757563	0	0.548857143	0.807142857	0.1	0.263736264	0.806	0.257142857	-1.582527622	-0.554720501	-4.23923333	-0.097069155	28	MODIFIER	MODERATE	NO	NO	NO	B	B	-1.81374127679645	-0.164176358211182	-6.85612015249996	-0.330450183769167	-1.093173031744444
AL2G33400	AT1G18250	OG0001721	ATLP-1	protein_coding	Pathogenesis-related thaumatin superfamily protein	.	ATLP-1%3B INVOLVED IN: response to other organism%3B LOCATED IN: endomembrane system%3B EXPRESSED IN: 19 plant structures%3B EXPRESSED DURING: 13 growth stages%3B CONTAINS InterPro DOMAIN/s: Thaumatin%2C conserved site (InterPro:IPR017949)%2C Thaumatin%2C pathogenesis-related (InterPro:IPR001938)%3B BEST Arabidopsis thaliana protein match is: Pathogenesis-related thaumatin superfamily protein (TA…	encodes a thaumatin-like protein	ATLP-1%3B INVOLVED IN: response to other organism%3B LOCATED IN: endomembrane system%3B EXPRESSED IN: 19 plant structures%3B EXPRESSED DURING: 13 growth stages%3B CONTAINS InterPro DOMAIN/s: Thaumatin%2C conserved site (InterPro:IPR017949)%2C Thaumatin%2C pathogenesis-related (InterPro:IPR001938)%3B BEST Arabidopsis thaliana protein match is: Pathogenesis-related thaumatin superfamily protein (TA…	scaffold_2	15917802	15919235	1434	+	scaffold_2	15917727	15918500	774	*	0.668184197	-0.035095105	302.1243052	0.821428571	3.57211122	0.058757563	0	0.548857143	0.807142857	0.1	0.263736264	0.806	0.257142857	-1.582527622	-0.554720501	-4.23923333	-0.097069155	28	MODIFIER	MODERATE	NO	NO	NO	B	A	-1.81374127679645	-0.164176358211182	-6.85612015249996	-0.330450183769167	-1.093173031744444
AL2G33400	AT1G18250	OG0001721	ATLP-1	protein_coding	Pathogenesis-related thaumatin superfamily protein	.	ATLP-1%3B INVOLVED IN: response to other organism%3B LOCATED IN: endomembrane system%3B EXPRESSED IN: 19 plant structures%3B EXPRESSED DURING: 13 growth stages%3B CONTAINS InterPro DOMAIN/s: Thaumatin%2C conserved site (InterPro:IPR017949)%2C Thaumatin%2C pathogenesis-related (InterPro:IPR001938)%3B BEST Arabidopsis thaliana protein match is: Pathogenesis-related thaumatin superfamily protein (TA…	encodes a thaumatin-like protein	ATLP-1%3B INVOLVED IN: response to other organism%3B LOCATED IN: endomembrane system%3B EXPRESSED IN: 19 plant structures%3B EXPRESSED DURING: 13 growth stages%3B CONTAINS InterPro DOMAIN/s: Thaumatin%2C conserved site (InterPro:IPR017949)%2C Thaumatin%2C pathogenesis-related (InterPro:IPR001938)%3B BEST Arabidopsis thaliana protein match is: Pathogenesis-related thaumatin superfamily protein (TA…	scaffold_2	15917802	15919235	1434	+	scaffold_2	15917727	15918500	774	*	0.668184197	-0.035095105	302.1243052	0.821428571	3.57211122	0.058757563	0	0.548857143	0.807142857	0.1	0.263736264	0.806	0.257142857	-1.582527622	-0.554720501	-4.23923333	-0.097069155	28	MODIFIER	MODERATE	NO	NO	NO	B	B	-1.81374127679645	-0.164176358211182	-6.85612015249996	-0.330450183769167	-1.093173031744444
AL3G15160	AT3G04870	OG0007527	ZDS	protein_coding	zeta-carotene desaturase	zeta-carotene desaturase	zeta-carotene desaturase (ZDS)%3B FUNCTIONS IN: carotene 7%2C8-desaturase activity%3B INVOLVED IN: carotene biosynthetic process%3B LOCATED IN: chloroplast%2C chloroplast envelope%3B EXPRESSED IN: 23 plant structures%3B EXPRESSED DURING: 13 growth stages%3B CONTAINS InterPro DOMAIN/s: Amine oxidase (InterPro:IPR002937)%2C Adrenodoxin reductase (InterPro:IPR000759)%2C Carotene 7%2C8-desaturase (In…	Involved in the biosynthesis of carotenes and xanthophylls%2C reduces zeta-carotene to lycopene.	zeta-carotene desaturase (ZDS)%3B FUNCTIONS IN: carotene 7%2C8-desaturase activity%3B INVOLVED IN: carotene biosynthetic process%3B LOCATED IN: chloroplast%2C chloroplast envelope%3B EXPRESSED IN: 23 plant structures%3B EXPRESSED DURING: 13 growth stages%3B CONTAINS InterPro DOMAIN/s: Amine oxidase (InterPro:IPR002937)%2C Adrenodoxin reductase (InterPro:IPR000759)%2C Carotene 7%2C8-desaturase (In…	scaffold_3	1740928	1744463	3536	+	scaffold_3	1742322	1742905	584	*	1	-0.024118791	281.5392852	1	6.279705116	0.012212842	0	-0.84	1	0	0	0.08	0.92	-2.452671681	-3.439414612	-0.476988279	-7.293129157	1	MODIFIER	NO	NO	NO	NO	A	A	-2.5325186144801	0.246534348546778	0	0.0908738005365225	-1.811950369428094
AL3G15160	AT3G04870	OG0007527	ZDS	protein_coding	zeta-carotene desaturase	zeta-carotene desaturase	zeta-carotene desaturase (ZDS)%3B FUNCTIONS IN: carotene 7%2C8-desaturase activity%3B INVOLVED IN: carotene biosynthetic process%3B LOCATED IN: chloroplast%2C chloroplast envelope%3B EXPRESSED IN: 23 plant structures%3B EXPRESSED DURING: 13 growth stages%3B CONTAINS InterPro DOMAIN/s: Amine oxidase (InterPro:IPR002937)%2C Adrenodoxin reductase (InterPro:IPR000759)%2C Carotene 7%2C8-desaturase (In…	Involved in the biosynthesis of carotenes and xanthophylls%2C reduces zeta-carotene to lycopene.	zeta-carotene desaturase (ZDS)%3B FUNCTIONS IN: carotene 7%2C8-desaturase activity%3B INVOLVED IN: carotene biosynthetic process%3B LOCATED IN: chloroplast%2C chloroplast envelope%3B EXPRESSED IN: 23 plant structures%3B EXPRESSED DURING: 13 growth stages%3B CONTAINS InterPro DOMAIN/s: Amine oxidase (InterPro:IPR002937)%2C Adrenodoxin reductase (InterPro:IPR000759)%2C Carotene 7%2C8-desaturase (In…	scaffold_3	1740928	1744463	3536	+	scaffold_3	1741783	1742319	537	*	0.848308585	-0.050524195	238.6886446	0.868571429	5.19793484	0.012212842	8.1793	-0.868571429	0.868571429	0	0.08967033	0	0.868571429	-2.452671681	-2.458618614	0	-6.225368455	75	MODIFIER	MODERATE	NO	NO	NO	A	A	-2.5325186144801	0.246534348546778	0	0.0908738005365225	-1.811950369428094
AL3G15160	AT3G04870	OG0007527	ZDS	protein_coding	zeta-carotene desaturase	zeta-carotene desaturase	zeta-carotene desaturase (ZDS)%3B FUNCTIONS IN: carotene 7%2C8-desaturase activity%3B INVOLVED IN: carotene biosynthetic process%3B LOCATED IN: chloroplast%2C chloroplast envelope%3B EXPRESSED IN: 23 plant structures%3B EXPRESSED DURING: 13 growth stages%3B CONTAINS InterPro DOMAIN/s: Amine oxidase (InterPro:IPR002937)%2C Adrenodoxin reductase (InterPro:IPR000759)%2C Carotene 7%2C8-desaturase (In…	Involved in the biosynthesis of carotenes and xanthophylls%2C reduces zeta-carotene to lycopene.	zeta-carotene desaturase (ZDS)%3B FUNCTIONS IN: carotene 7%2C8-desaturase activity%3B INVOLVED IN: carotene biosynthetic process%3B LOCATED IN: chloroplast%2C chloroplast envelope%3B EXPRESSED IN: 23 plant structures%3B EXPRESSED DURING: 13 growth stages%3B CONTAINS InterPro DOMAIN/s: Amine oxidase (InterPro:IPR002937)%2C Adrenodoxin reductase (InterPro:IPR000759)%2C Carotene 7%2C8-desaturase (In…	scaffold_3	1740928	1744463	3536	+	scaffold_3	1741783	1742319	537	*	0.848308585	-0.050524195	238.6886446	0.868571429	5.19793484	0.012212842	8.1793	-0.868571429	0.868571429	0	0.08967033	0	0.868571429	-2.452671681	-2.458618614	0	-6.225368455	86	MODIFIER	MODERATE	NO	NO	NO	A	A	-2.5325186144801	0.246534348546778	0	0.0908738005365225	-1.811950369428094
AL3G15160	AT3G04870	OG0007527	ZDS	protein_coding	zeta-carotene desaturase	zeta-carotene desaturase	zeta-carotene desaturase (ZDS)%3B FUNCTIONS IN: carotene 7%2C8-desaturase activity%3B INVOLVED IN: carotene biosynthetic process%3B LOCATED IN: chloroplast%2C chloroplast envelope%3B EXPRESSED IN: 23 plant structures%3B EXPRESSED DURING: 13 growth stages%3B CONTAINS InterPro DOMAIN/s: Amine oxidase (InterPro:IPR002937)%2C Adrenodoxin reductase (InterPro:IPR000759)%2C Carotene 7%2C8-desaturase (In…	Involved in the biosynthesis of carotenes and xanthophylls%2C reduces zeta-carotene to lycopene.	zeta-carotene desaturase (ZDS)%3B FUNCTIONS IN: carotene 7%2C8-desaturase activity%3B INVOLVED IN: carotene biosynthetic process%3B LOCATED IN: chloroplast%2C chloroplast envelope%3B EXPRESSED IN: 23 plant structures%3B EXPRESSED DURING: 13 growth stages%3B CONTAINS InterPro DOMAIN/s: Amine oxidase (InterPro:IPR002937)%2C Adrenodoxin reductase (InterPro:IPR000759)%2C Carotene 7%2C8-desaturase (In…	scaffold_3	1740928	1744463	3536	+	scaffold_3	1741783	1742319	537	*	0.848308585	-0.050524195	238.6886446	0.868571429	5.19793484	0.012212842	8.1793	-0.868571429	0.868571429	0	0.08967033	0	0.868571429	-2.452671681	-2.458618614	0	-6.225368455	85	MODIFIER	MODERATE	NO	NO	NO	A	A	-2.5325186144801	0.246534348546778	0	0.0908738005365225	-1.811950369428094
AL3G18320	AT3G07090	OG0010716	.	protein_coding	PPPDE putative thiol peptidase family protein	.	PPPDE putative thiol peptidase family protein%3B CONTAINS InterPro DOMAIN/s: Protein of unknown function DUF862%2C eukaryotic (InterPro:IPR008580)%3B BEST Arabidopsis thaliana protein match is: PPPDE putative thiol peptidase family protein (TAIR:AT5G25170.1)%3B Has 872 Blast hits to 872 proteins in 189 species: Archae - 0%3B Bacteria - 0%3B Metazoa - 235%3B Fungi - 119%3B Plants - 332%3B Viruses …	.	PPPDE putative thiol peptidase family protein%3B CONTAINS InterPro DOMAIN/s: Protein of unknown function DUF862%2C eukaryotic (InterPro:IPR008580)%3B BEST Arabidopsis thaliana protein match is: PPPDE putative thiol peptidase family protein (TAIR:AT5G25170.1)%3B Has 872 Blast hits to 872 proteins in 189 species: Archae - 0%3B Bacteria - 0%3B Metazoa - 235%3B Fungi - 119%3B Plants - 332%3B Viruses …	scaffold_3	2980864	2982688	1825	-	scaffold_3	2981630	2981949	320	*	0.875938866	-0.025215077	218.2460858	0.896	5.45075297	0.012212842	4.7107	0.576	0.896	0.020210526	0.057142857	0.736	0.16	-2.276810987	-2.814397555	-4.27381498	-0.847737284	70	MODIFIER	NO	NO	NO	NO	A	B	-1.93669003192654	-1.02616179214764	0.052902161670526	-0.51219778484221	-1.216121786874534
AL3G18320	AT3G07090	OG0010716	.	protein_coding	PPPDE putative thiol peptidase family protein	.	PPPDE putative thiol peptidase family protein%3B CONTAINS InterPro DOMAIN/s: Protein of unknown function DUF862%2C eukaryotic (InterPro:IPR008580)%3B BEST Arabidopsis thaliana protein match is: PPPDE putative thiol peptidase family protein (TAIR:AT5G25170.1)%3B Has 872 Blast hits to 872 proteins in 189 species: Archae - 0%3B Bacteria - 0%3B Metazoa - 235%3B Fungi - 119%3B Plants - 332%3B Viruses …	.	PPPDE putative thiol peptidase family protein%3B CONTAINS InterPro DOMAIN/s: Protein of unknown function DUF862%2C eukaryotic (InterPro:IPR008580)%3B BEST Arabidopsis thaliana protein match is: PPPDE putative thiol peptidase family protein (TAIR:AT5G25170.1)%3B Has 872 Blast hits to 872 proteins in 189 species: Archae - 0%3B Bacteria - 0%3B Metazoa - 235%3B Fungi - 119%3B Plants - 332%3B Viruses …	scaffold_3	2980864	2982688	1825	-	scaffold_3	2981630	2981949	320	*	0.875938866	-0.025215077	218.2460858	0.896	5.45075297	0.012212842	4.7107	0.576	0.896	0.020210526	0.057142857	0.736	0.16	-2.276810987	-2.814397555	-4.27381498	-0.847737284	68	MODIFIER	NO	NO	NO	NO	A	B	-1.93669003192654	-1.02616179214764	0.052902161670526	-0.51219778484221	-1.216121786874534
AL3G18320	AT3G07090	OG0010716	.	protein_coding	PPPDE putative thiol peptidase family protein	.	PPPDE putative thiol peptidase family protein%3B CONTAINS InterPro DOMAIN/s: Protein of unknown function DUF862%2C eukaryotic (InterPro:IPR008580)%3B BEST Arabidopsis thaliana protein match is: PPPDE putative thiol peptidase family protein (TAIR:AT5G25170.1)%3B Has 872 Blast hits to 872 proteins in 189 species: Archae - 0%3B Bacteria - 0%3B Metazoa - 235%3B Fungi - 119%3B Plants - 332%3B Viruses …	.	PPPDE putative thiol peptidase family protein%3B CONTAINS InterPro DOMAIN/s: Protein of unknown function DUF862%2C eukaryotic (InterPro:IPR008580)%3B BEST Arabidopsis thaliana protein match is: PPPDE putative thiol peptidase family protein (TAIR:AT5G25170.1)%3B Has 872 Blast hits to 872 proteins in 189 species: Archae - 0%3B Bacteria - 0%3B Metazoa - 235%3B Fungi - 119%3B Plants - 332%3B Viruses …	scaffold_3	2980864	2982688	1825	-	scaffold_3	2981630	2981949	320	*	0.875938866	-0.025215077	218.2460858	0.896	5.45075297	0.012212842	4.7107	0.576	0.896	0.020210526	0.057142857	0.736	0.16	-2.276810987	-2.814397555	-4.27381498	-0.847737284	64	MODIFIER	NO	NO	NO	NO	A	B	-1.93669003192654	-1.02616179214764	0.052902161670526	-0.51219778484221	-1.216121786874534
AL3G19880	AT5G01610	OG0000393	.	protein_coding	hypothetical protein (Protein of unknown function%2C DUF538)	.	Protein of unknown function%2C DUF538%3B CONTAINS InterPro DOMAIN/s: Protein of unknown function DUF538 (InterPro:IPR007493)%3B BEST Arabidopsis thaliana protein match is: Protein of unknown function%2C DUF538 (TAIR:AT3G08890.2)%3B Has 1807 Blast hits to 1807 proteins in 277 species: Archae - 0%3B Bacteria - 0%3B Metazoa - 736%3B Fungi - 347%3B Plants - 385%3B Viruses - 0%3B Other Eukaryotes - 33…	.	Protein of unknown function%2C DUF538%3B CONTAINS InterPro DOMAIN/s: Protein of unknown function DUF538 (InterPro:IPR007493)%3B BEST Arabidopsis thaliana protein match is: Protein of unknown function%2C DUF538 (TAIR:AT3G08890.2)%3B Has 1807 Blast hits to 1807 proteins in 277 species: Archae - 0%3B Bacteria - 0%3B Metazoa - 736%3B Fungi - 347%3B Plants - 385%3B Viruses - 0%3B Other Eukaryotes - 33…	scaffold_3	3507786	3509228	1443	+	scaffold_3	3508840	3509298	459	*	0.187347285	-0.258025925	287.935833	0.565142857	1.054195763	0.100709152	26.4628	0.386857143	0.421142857	0.406736842	0.402637363	0.644	0.257142857	1.086524786	0.964551731	-1.535902258	0.925392608	72	MODIFIER		NO	NO	NO	C	B	0.410685431403477	1.03246224419472	-1.74365524866048	0.991350551307507	1.1312536764554832
AL3G19880	AT5G01610	OG0000393	.	protein_coding	hypothetical protein (Protein of unknown function%2C DUF538)	.	Protein of unknown function%2C DUF538%3B CONTAINS InterPro DOMAIN/s: Protein of unknown function DUF538 (InterPro:IPR007493)%3B BEST Arabidopsis thaliana protein match is: Protein of unknown function%2C DUF538 (TAIR:AT3G08890.2)%3B Has 1807 Blast hits to 1807 proteins in 277 species: Archae - 0%3B Bacteria - 0%3B Metazoa - 736%3B Fungi - 347%3B Plants - 385%3B Viruses - 0%3B Other Eukaryotes - 33…	.	Protein of unknown function%2C DUF538%3B CONTAINS InterPro DOMAIN/s: Protein of unknown function DUF538 (InterPro:IPR007493)%3B BEST Arabidopsis thaliana protein match is: Protein of unknown function%2C DUF538 (TAIR:AT3G08890.2)%3B Has 1807 Blast hits to 1807 proteins in 277 species: Archae - 0%3B Bacteria - 0%3B Metazoa - 736%3B Fungi - 347%3B Plants - 385%3B Viruses - 0%3B Other Eukaryotes - 33…	scaffold_3	3507786	3509228	1443	+	scaffold_3	3508840	3509298	459	*	0.187347285	-0.258025925	287.935833	0.565142857	1.054195763	0.100709152	26.4628	0.386857143	0.421142857	0.406736842	0.402637363	0.644	0.257142857	1.086524786	0.964551731	-1.535902258	0.925392608	72	MODIFIER		NO	NO	NO	C	A	0.410685431403477	1.03246224419472	-1.74365524866048	0.991350551307507	1.1312536764554832
AL3G19880	AT5G01610	OG0000393	.	protein_coding	hypothetical protein (Protein of unknown function%2C DUF538)	.	Protein of unknown function%2C DUF538%3B CONTAINS InterPro DOMAIN/s: Protein of unknown function DUF538 (InterPro:IPR007493)%3B BEST Arabidopsis thaliana protein match is: Protein of unknown function%2C DUF538 (TAIR:AT3G08890.2)%3B Has 1807 Blast hits to 1807 proteins in 277 species: Archae - 0%3B Bacteria - 0%3B Metazoa - 736%3B Fungi - 347%3B Plants - 385%3B Viruses - 0%3B Other Eukaryotes - 33…	.	Protein of unknown function%2C DUF538%3B CONTAINS InterPro DOMAIN/s: Protein of unknown function DUF538 (InterPro:IPR007493)%3B BEST Arabidopsis thaliana protein match is: Protein of unknown function%2C DUF538 (TAIR:AT3G08890.2)%3B Has 1807 Blast hits to 1807 proteins in 277 species: Archae - 0%3B Bacteria - 0%3B Metazoa - 736%3B Fungi - 347%3B Plants - 385%3B Viruses - 0%3B Other Eukaryotes - 33…	scaffold_3	3507786	3509228	1443	+	scaffold_3	3508840	3509298	459	*	0.187347285	-0.258025925	287.935833	0.565142857	1.054195763	0.100709152	26.4628	0.386857143	0.421142857	0.406736842	0.402637363	0.644	0.257142857	1.086524786	0.964551731	-1.535902258	0.925392608	72	MODIFIER		NO	NO	NO	C	A	0.410685431403477	1.03246224419472	-1.74365524866048	0.991350551307507	1.1312536764554832
AL3G19880	AT3G08890	OG0000393	.	protein_coding	hypothetical protein (Protein of unknown function%2C DUF538)	.	Protein of unknown function%2C DUF538%3B CONTAINS InterPro DOMAIN/s: Protein of unknown function DUF538 (InterPro:IPR007493)%3B BEST Arabidopsis thaliana protein match is: Protein of unknown function%2C DUF538 (TAIR:AT5G37070.1)%3B Has 520 Blast hits to 520 proteins in 25 species: Archae - 0%3B Bacteria - 0%3B Metazoa - 0%3B Fungi - 0%3B Plants - 520%3B Viruses - 0%3B Other Eukaryotes - 0 (source…	.	Protein of unknown function%2C DUF538%3B CONTAINS InterPro DOMAIN/s: Protein of unknown function DUF538 (InterPro:IPR007493)%3B BEST Arabidopsis thaliana protein match is: Protein of unknown function%2C DUF538 (TAIR:AT5G37070.1)%3B Has 520 Blast hits to 520 proteins in 25 species: Archae - 0%3B Bacteria - 0%3B Metazoa - 0%3B Fungi - 0%3B Plants - 520%3B Viruses - 0%3B Other Eukaryotes - 0 (source…	scaffold_3	3507786	3509228	1443	+	scaffold_3	3508840	3509298	459	*	0.187347285	-0.258025925	287.935833	0.565142857	1.054195763	0.100709152	26.4628	0.386857143	0.421142857	0.406736842	0.402637363	0.644	0.257142857	1.086524786	0.964551731	-1.535902258	0.925392608	72	MODIFIER		NO	NO	NO	C	B	0.410685431403477	1.03246224419472	-1.74365524866048	0.991350551307507	1.1312536764554832
AL3G19880	AT3G08890	OG0000393	.	protein_coding	hypothetical protein (Protein of unknown function%2C DUF538)	.	Protein of unknown function%2C DUF538%3B CONTAINS InterPro DOMAIN/s: Protein of unknown function DUF538 (InterPro:IPR007493)%3B BEST Arabidopsis thaliana protein match is: Protein of unknown function%2C DUF538 (TAIR:AT5G37070.1)%3B Has 520 Blast hits to 520 proteins in 25 species: Archae - 0%3B Bacteria - 0%3B Metazoa - 0%3B Fungi - 0%3B Plants - 520%3B Viruses - 0%3B Other Eukaryotes - 0 (source…	.	Protein of unknown function%2C DUF538%3B CONTAINS InterPro DOMAIN/s: Protein of unknown function DUF538 (InterPro:IPR007493)%3B BEST Arabidopsis thaliana protein match is: Protein of unknown function%2C DUF538 (TAIR:AT5G37070.1)%3B Has 520 Blast hits to 520 proteins in 25 species: Archae - 0%3B Bacteria - 0%3B Metazoa - 0%3B Fungi - 0%3B Plants - 520%3B Viruses - 0%3B Other Eukaryotes - 0 (source…	scaffold_3	3507786	3509228	1443	+	scaffold_3	3508840	3509298	459	*	0.187347285	-0.258025925	287.935833	0.565142857	1.054195763	0.100709152	26.4628	0.386857143	0.421142857	0.406736842	0.402637363	0.644	0.257142857	1.086524786	0.964551731	-1.535902258	0.925392608	72	MODIFIER		NO	NO	NO	C	A	0.410685431403477	1.03246224419472	-1.74365524866048	0.991350551307507	1.1312536764554832
AL3G19880	AT3G08890	OG0000393	.	protein_coding	hypothetical protein (Protein of unknown function%2C DUF538)	.	Protein of unknown function%2C DUF538%3B CONTAINS InterPro DOMAIN/s: Protein of unknown function DUF538 (InterPro:IPR007493)%3B BEST Arabidopsis thaliana protein match is: Protein of unknown function%2C DUF538 (TAIR:AT5G37070.1)%3B Has 520 Blast hits to 520 proteins in 25 species: Archae - 0%3B Bacteria - 0%3B Metazoa - 0%3B Fungi - 0%3B Plants - 520%3B Viruses - 0%3B Other Eukaryotes - 0 (source…	.	Protein of unknown function%2C DUF538%3B CONTAINS InterPro DOMAIN/s: Protein of unknown function DUF538 (InterPro:IPR007493)%3B BEST Arabidopsis thaliana protein match is: Protein of unknown function%2C DUF538 (TAIR:AT5G37070.1)%3B Has 520 Blast hits to 520 proteins in 25 species: Archae - 0%3B Bacteria - 0%3B Metazoa - 0%3B Fungi - 0%3B Plants - 520%3B Viruses - 0%3B Other Eukaryotes - 0 (source…	scaffold_3	3507786	3509228	1443	+	scaffold_3	3508840	3509298	459	*	0.187347285	-0.258025925	287.935833	0.565142857	1.054195763	0.100709152	26.4628	0.386857143	0.421142857	0.406736842	0.402637363	0.644	0.257142857	1.086524786	0.964551731	-1.535902258	0.925392608	72	MODIFIER		NO	NO	NO	C	A	0.410685431403477	1.03246224419472	-1.74365524866048	0.991350551307507	1.1312536764554832
AL3G19880	AT5G37070	OG0000393	.	protein_coding	hypothetical protein (Protein of unknown function%2C DUF538)	.	Protein of unknown function%2C DUF538%3B CONTAINS InterPro DOMAIN/s: Protein of unknown function DUF538 (InterPro:IPR007493)%3B BEST Arabidopsis thaliana protein match is: Protein of unknown function%2C DUF538 (TAIR:AT3G08890.2)%3B Has 1807 Blast hits to 1807 proteins in 277 species: Archae - 0%3B Bacteria - 0%3B Metazoa - 736%3B Fungi - 347%3B Plants - 385%3B Viruses - 0%3B Other Eukaryotes - 33…	.	Protein of unknown function%2C DUF538%3B CONTAINS InterPro DOMAIN/s: Protein of unknown function DUF538 (InterPro:IPR007493)%3B BEST Arabidopsis thaliana protein match is: Protein of unknown function%2C DUF538 (TAIR:AT3G08890.2)%3B Has 1807 Blast hits to 1807 proteins in 277 species: Archae - 0%3B Bacteria - 0%3B Metazoa - 736%3B Fungi - 347%3B Plants - 385%3B Viruses - 0%3B Other Eukaryotes - 33…	scaffold_3	3507786	3509228	1443	+	scaffold_3	3508840	3509298	459	*	0.187347285	-0.258025925	287.935833	0.565142857	1.054195763	0.100709152	26.4628	0.386857143	0.421142857	0.406736842	0.402637363	0.644	0.257142857	1.086524786	0.964551731	-1.535902258	0.925392608	72	MODIFIER		NO	NO	NO	C	B	0.410685431403477	1.03246224419472	-1.74365524866048	0.991350551307507	1.1312536764554832
AL3G19880	AT5G37070	OG0000393	.	protein_coding	hypothetical protein (Protein of unknown function%2C DUF538)	.	Protein of unknown function%2C DUF538%3B CONTAINS InterPro DOMAIN/s: Protein of unknown function DUF538 (InterPro:IPR007493)%3B BEST Arabidopsis thaliana protein match is: Protein of unknown function%2C DUF538 (TAIR:AT3G08890.2)%3B Has 1807 Blast hits to 1807 proteins in 277 species: Archae - 0%3B Bacteria - 0%3B Metazoa - 736%3B Fungi - 347%3B Plants - 385%3B Viruses - 0%3B Other Eukaryotes - 33…	.	Protein of unknown function%2C DUF538%3B CONTAINS InterPro DOMAIN/s: Protein of unknown function DUF538 (InterPro:IPR007493)%3B BEST Arabidopsis thaliana protein match is: Protein of unknown function%2C DUF538 (TAIR:AT3G08890.2)%3B Has 1807 Blast hits to 1807 proteins in 277 species: Archae - 0%3B Bacteria - 0%3B Metazoa - 736%3B Fungi - 347%3B Plants - 385%3B Viruses - 0%3B Other Eukaryotes - 33…	scaffold_3	3507786	3509228	1443	+	scaffold_3	3508840	3509298	459	*	0.187347285	-0.258025925	287.935833	0.565142857	1.054195763	0.100709152	26.4628	0.386857143	0.421142857	0.406736842	0.402637363	0.644	0.257142857	1.086524786	0.964551731	-1.535902258	0.925392608	72	MODIFIER		NO	NO	NO	C	A	0.410685431403477	1.03246224419472	-1.74365524866048	0.991350551307507	1.1312536764554832
AL3G19880	AT5G37070	OG0000393	.	protein_coding	hypothetical protein (Protein of unknown function%2C DUF538)	.	Protein of unknown function%2C DUF538%3B CONTAINS InterPro DOMAIN/s: Protein of unknown function DUF538 (InterPro:IPR007493)%3B BEST Arabidopsis thaliana protein match is: Protein of unknown function%2C DUF538 (TAIR:AT3G08890.2)%3B Has 1807 Blast hits to 1807 proteins in 277 species: Archae - 0%3B Bacteria - 0%3B Metazoa - 736%3B Fungi - 347%3B Plants - 385%3B Viruses - 0%3B Other Eukaryotes - 33…	.	Protein of unknown function%2C DUF538%3B CONTAINS InterPro DOMAIN/s: Protein of unknown function DUF538 (InterPro:IPR007493)%3B BEST Arabidopsis thaliana protein match is: Protein of unknown function%2C DUF538 (TAIR:AT3G08890.2)%3B Has 1807 Blast hits to 1807 proteins in 277 species: Archae - 0%3B Bacteria - 0%3B Metazoa - 736%3B Fungi - 347%3B Plants - 385%3B Viruses - 0%3B Other Eukaryotes - 33…	scaffold_3	3507786	3509228	1443	+	scaffold_3	3508840	3509298	459	*	0.187347285	-0.258025925	287.935833	0.565142857	1.054195763	0.100709152	26.4628	0.386857143	0.421142857	0.406736842	0.402637363	0.644	0.257142857	1.086524786	0.964551731	-1.535902258	0.925392608	72	MODIFIER		NO	NO	NO	C	A	0.410685431403477	1.03246224419472	-1.74365524866048	0.991350551307507	1.1312536764554832
AL3G20900	AT3G09690	OG0007440	.	protein_coding	alpha/beta-Hydrolases superfamily protein	.	alpha/beta-Hydrolases superfamily protein%3B FUNCTIONS IN: hydrolase activity%3B INVOLVED IN: biological_process unknown%3B LOCATED IN: cellular_component unknown%3B EXPRESSED IN: 23 plant structures%3B EXPRESSED DURING: 13 growth stages%3B CONTAINS InterPro DOMAIN/s: Alpha/beta hydrolase fold-1 (InterPro:IPR000073)%3B BEST Arabidopsis thaliana protein match is: alpha/beta-Hydrolases superfamily …	.	alpha/beta-Hydrolases superfamily protein%3B FUNCTIONS IN: hydrolase activity%3B INVOLVED IN: biological_process unknown%3B LOCATED IN: cellular_component unknown%3B EXPRESSED IN: 23 plant structures%3B EXPRESSED DURING: 13 growth stages%3B CONTAINS InterPro DOMAIN/s: Alpha/beta hydrolase fold-1 (InterPro:IPR000073)%3B BEST Arabidopsis thaliana protein match is: alpha/beta-Hydrolases superfamily …	scaffold_3	3831803	3834800	2998	+	scaffold_3	3832996	3833507	512	*	0.760123377	-0.037907624	293.3589678	0.848571429	3.887447613	0.046297869	0	-0.845142857	0.845142857	0.017684211	0.263736264	0.012	0.857142857	-2.298793574	-0.554720501	0.028619297	-4.853457735	53	MODIFIER	MODERATE	NO	NO	NO	A	A	-2.23176704423878	-1.21377038659264	0.103688236874228	-4.68413135492797	-1.5111987991867737
AL3G20900	AT3G09690	OG0007440	.	protein_coding	alpha/beta-Hydrolases superfamily protein	.	alpha/beta-Hydrolases superfamily protein%3B FUNCTIONS IN: hydrolase activity%3B INVOLVED IN: biological_process unknown%3B LOCATED IN: cellular_component unknown%3B EXPRESSED IN: 23 plant structures%3B EXPRESSED DURING: 13 growth stages%3B CONTAINS InterPro DOMAIN/s: Alpha/beta hydrolase fold-1 (InterPro:IPR000073)%3B BEST Arabidopsis thaliana protein match is: alpha/beta-Hydrolases superfamily …	.	alpha/beta-Hydrolases superfamily protein%3B FUNCTIONS IN: hydrolase activity%3B INVOLVED IN: biological_process unknown%3B LOCATED IN: cellular_component unknown%3B EXPRESSED IN: 23 plant structures%3B EXPRESSED DURING: 13 growth stages%3B CONTAINS InterPro DOMAIN/s: Alpha/beta hydrolase fold-1 (InterPro:IPR000073)%3B BEST Arabidopsis thaliana protein match is: alpha/beta-Hydrolases superfamily …	scaffold_3	3831803	3834800	2998	+	scaffold_3	3832996	3833507	512	*	0.760123377	-0.037907624	293.3589678	0.848571429	3.887447613	0.046297869	0	-0.845142857	0.845142857	0.017684211	0.263736264	0.012	0.857142857	-2.298793574	-0.554720501	0.028619297	-4.853457735	127	MODIFIER	MODERATE	NO	NO	NO	B	A	-2.23176704423878	-1.21377038659264	0.103688236874228	-4.68413135492797	-1.5111987991867737
AL3G28850	AT3G16170	OG0007728	AAE13	protein_coding	AMP-dependent synthetase and ligase family protein	acyl activating enzyme 13	AMP-dependent synthetase and ligase family protein%3B FUNCTIONS IN: catalytic activity%2C AMP binding%3B INVOLVED IN: metabolic process%3B LOCATED IN: membrane%3B EXPRESSED IN: 21 plant structures%3B EXPRESSED DURING: 12 growth stages%3B CONTAINS InterPro DOMAIN/s: AMP-binding%2C conserved site (InterPro:IPR020845)%2C AMP-dependent synthetase/ligase (InterPro:IPR000873)%3B BEST Arabidopsis thalia…	.	AMP-dependent synthetase and ligase family protein%3B FUNCTIONS IN: catalytic activity%2C AMP binding%3B INVOLVED IN: metabolic process%3B LOCATED IN: membrane%3B EXPRESSED IN: 21 plant structures%3B EXPRESSED DURING: 12 growth stages%3B CONTAINS InterPro DOMAIN/s: AMP-binding%2C conserved site (InterPro:IPR020845)%2C AMP-dependent synthetase/ligase (InterPro:IPR000873)%3B BEST Arabidopsis thalia…	scaffold_3	6777943	6782447	4505	+	scaffold_3	6779593	6780079	487	*	0.355401468	-0.384941398	295.5931067	0.581714286	3.039974294	0.071591606	10.1619	-0.522285714	0.566285714	0.506526316	0.01978022	0.412	0.934285714	1.954836963	-3.223062554	0.412594861	-7.260772772	47	MODIFIER	MODERATE	NO	NO	NO	C	B	1.99956165154629	-1.85772421076869	0.414752947496923	-0.322188929174939	2.720129896598296
AL3G28850	AT3G16170	OG0007728	AAE13	protein_coding	AMP-dependent synthetase and ligase family protein	acyl activating enzyme 13	AMP-dependent synthetase and ligase family protein%3B FUNCTIONS IN: catalytic activity%2C AMP binding%3B INVOLVED IN: metabolic process%3B LOCATED IN: membrane%3B EXPRESSED IN: 21 plant structures%3B EXPRESSED DURING: 12 growth stages%3B CONTAINS InterPro DOMAIN/s: AMP-binding%2C conserved site (InterPro:IPR020845)%2C AMP-dependent synthetase/ligase (InterPro:IPR000873)%3B BEST Arabidopsis thalia…	.	AMP-dependent synthetase and ligase family protein%3B FUNCTIONS IN: catalytic activity%2C AMP binding%3B INVOLVED IN: metabolic process%3B LOCATED IN: membrane%3B EXPRESSED IN: 21 plant structures%3B EXPRESSED DURING: 12 growth stages%3B CONTAINS InterPro DOMAIN/s: AMP-binding%2C conserved site (InterPro:IPR020845)%2C AMP-dependent synthetase/ligase (InterPro:IPR000873)%3B BEST Arabidopsis thalia…	scaffold_3	6777943	6782447	4505	+	scaffold_3	6780942	6781431	490	*	0.311558162	-0.362268857	299.1980225	0.514	2.728186515	0.087216641	3.8944	-0.414	0.514	0.494105263	0	0.466	0.88	1.846755911	-3.439414612	0.020272002	-6.976036585	32	MODIFIER	MODERATE	NO	NO	NO	C	B	0.658474460973365	-1.85772421076869	-0.471887282101081	-0.322188929174939	1.3790427060253712
AL3G31800	AT3G18500	OG0015836	.	protein_coding	Dse I-like superfamily protein	.	Dse I-like superfamily protein%3B CONTAINS InterPro DOMAIN/s: Endonuclease/exonuclease/phosphatase (InterPro:IPR005135)%3B BEST Arabidopsis thaliana protein match is: Dse I-like superfamily protein (TAIR:AT1G73875.1)%3B Has 1180 Blast hits to 1142 proteins in 213 species: Archae - 0%3B Bacteria - 8%3B Metazoa - 512%3B Fungi - 213%3B Plants - 283%3B Viruses - 0%3B Other Eukaryotes - 164 (source: N…	.	Dse I-like superfamily protein%3B CONTAINS InterPro DOMAIN/s: Endonuclease/exonuclease/phosphatase (InterPro:IPR005135)%3B BEST Arabidopsis thaliana protein match is: Dse I-like superfamily protein (TAIR:AT1G73875.1)%3B Has 1180 Blast hits to 1142 proteins in 213 species: Archae - 0%3B Bacteria - 8%3B Metazoa - 512%3B Fungi - 213%3B Plants - 283%3B Viruses - 0%3B Other Eukaryotes - 164 (source: N…	scaffold_3	7929955	7932920	2966	+	scaffold_3	7930411	7930841	431	*	0.946481481	-0.011531859	233.6437175	0.96	5.937869762	0.012212842	0	0.12	0.96	0.021052632	0.021538462	0.54	0.42	-2.269483458	-3.20383126	-3.100423814	-3.17092572	32	MODIFIER	MODERATE	NO	NO	NO	A	B	-2.30742781662653	-2.84647220851934	-0.361850785826386	0.173486346478813	-1.586859571574524
AL3G31800	AT3G18500	OG0015836	.	protein_coding	Dse I-like superfamily protein	.	Dse I-like superfamily protein%3B CONTAINS InterPro DOMAIN/s: Endonuclease/exonuclease/phosphatase (InterPro:IPR005135)%3B BEST Arabidopsis thaliana protein match is: Dse I-like superfamily protein (TAIR:AT1G73875.1)%3B Has 1180 Blast hits to 1142 proteins in 213 species: Archae - 0%3B Bacteria - 8%3B Metazoa - 512%3B Fungi - 213%3B Plants - 283%3B Viruses - 0%3B Other Eukaryotes - 164 (source: N…	.	Dse I-like superfamily protein%3B CONTAINS InterPro DOMAIN/s: Endonuclease/exonuclease/phosphatase (InterPro:IPR005135)%3B BEST Arabidopsis thaliana protein match is: Dse I-like superfamily protein (TAIR:AT1G73875.1)%3B Has 1180 Blast hits to 1142 proteins in 213 species: Archae - 0%3B Bacteria - 8%3B Metazoa - 512%3B Fungi - 213%3B Plants - 283%3B Viruses - 0%3B Other Eukaryotes - 164 (source: N…	scaffold_3	7929955	7932920	2966	+	scaffold_3	7931549	7932083	535	*	0.935811435	-0.030934724	225.9072304	0.946571429	5.834237565	0.012212842	2.5455	0.409428571	0.946571429	0.004	0.036043956	0.678	0.268571429	-2.417865919	-3.045173084	-4.019818721	-1.86372777	37	MODIFIER	MODERATE	NO	NO	NO	A	B	-2.316885413175	-2.92252974680785	-2.17110471495832	0.140441328101897	-1.596317168122994
AL3G31800	AT3G18500	OG0015836	.	protein_coding	Dse I-like superfamily protein	.	Dse I-like superfamily protein%3B CONTAINS InterPro DOMAIN/s: Endonuclease/exonuclease/phosphatase (InterPro:IPR005135)%3B BEST Arabidopsis thaliana protein match is: Dse I-like superfamily protein (TAIR:AT1G73875.1)%3B Has 1180 Blast hits to 1142 proteins in 213 species: Archae - 0%3B Bacteria - 8%3B Metazoa - 512%3B Fungi - 213%3B Plants - 283%3B Viruses - 0%3B Other Eukaryotes - 164 (source: N…	.	Dse I-like superfamily protein%3B CONTAINS InterPro DOMAIN/s: Endonuclease/exonuclease/phosphatase (InterPro:IPR005135)%3B BEST Arabidopsis thaliana protein match is: Dse I-like superfamily protein (TAIR:AT1G73875.1)%3B Has 1180 Blast hits to 1142 proteins in 213 species: Archae - 0%3B Bacteria - 8%3B Metazoa - 512%3B Fungi - 213%3B Plants - 283%3B Viruses - 0%3B Other Eukaryotes - 164 (source: N…	scaffold_3	7929955	7932920	2966	+	scaffold_3	7926956	7930395	3440	*	0.798203807	-0.053202723	199.6074414	0.818285714	4.915935744	0.012212842	7.61	-0.376	0.818285714	0.007578947	0.082197802	0.244	0.62	-2.386723921	-2.540351614	-1.411885306	-4.309870469	126	MODIFIER	NO	NO	NO	NO	A	B	-2.30742781662653	-0.772636664519271	-0.361850785826386	0.330450183769169	-1.586859571574524
AL3G31800	AT3G18500	OG0015836	.	protein_coding	Dse I-like superfamily protein	.	Dse I-like superfamily protein%3B CONTAINS InterPro DOMAIN/s: Endonuclease/exonuclease/phosphatase (InterPro:IPR005135)%3B BEST Arabidopsis thaliana protein match is: Dse I-like superfamily protein (TAIR:AT1G73875.1)%3B Has 1180 Blast hits to 1142 proteins in 213 species: Archae - 0%3B Bacteria - 8%3B Metazoa - 512%3B Fungi - 213%3B Plants - 283%3B Viruses - 0%3B Other Eukaryotes - 164 (source: N…	.	Dse I-like superfamily protein%3B CONTAINS InterPro DOMAIN/s: Endonuclease/exonuclease/phosphatase (InterPro:IPR005135)%3B BEST Arabidopsis thaliana protein match is: Dse I-like superfamily protein (TAIR:AT1G73875.1)%3B Has 1180 Blast hits to 1142 proteins in 213 species: Archae - 0%3B Bacteria - 8%3B Metazoa - 512%3B Fungi - 213%3B Plants - 283%3B Viruses - 0%3B Other Eukaryotes - 164 (source: N…	scaffold_3	7929955	7932920	2966	+	scaffold_3	7932085	7932683	599	*	0.927142857	-0.037895524	229.146866	0.931428571	5.800232658	0.012212842	0	0.428571429	0.931428571	0	0.021098901	0.68	0.251428571	-2.452671681	-3.208639083	-4.054400372	-1.837842662	49	MODIFIER	MODERATE	NO	NO	NO	A	B	-2.2885126235296	-2.65886361407435	0.124849101542438	-0.165225091884584	-1.5679443784775937
AL3G31800	AT3G18500	OG0015836	.	protein_coding	Dse I-like superfamily protein	.	Dse I-like superfamily protein%3B CONTAINS InterPro DOMAIN/s: Endonuclease/exonuclease/phosphatase (InterPro:IPR005135)%3B BEST Arabidopsis thaliana protein match is: Dse I-like superfamily protein (TAIR:AT1G73875.1)%3B Has 1180 Blast hits to 1142 proteins in 213 species: Archae - 0%3B Bacteria - 8%3B Metazoa - 512%3B Fungi - 213%3B Plants - 283%3B Viruses - 0%3B Other Eukaryotes - 164 (source: N…	.	Dse I-like superfamily protein%3B CONTAINS InterPro DOMAIN/s: Endonuclease/exonuclease/phosphatase (InterPro:IPR005135)%3B BEST Arabidopsis thaliana protein match is: Dse I-like superfamily protein (TAIR:AT1G73875.1)%3B Has 1180 Blast hits to 1142 proteins in 213 species: Archae - 0%3B Bacteria - 8%3B Metazoa - 512%3B Fungi - 213%3B Plants - 283%3B Viruses - 0%3B Other Eukaryotes - 164 (source: N…	scaffold_3	7929955	7932920	2966	+	scaffold_3	7932085	7932683	599	*	0.927142857	-0.037895524	229.146866	0.931428571	5.800232658	0.012212842	0	0.428571429	0.931428571	0	0.021098901	0.68	0.251428571	-2.452671681	-3.208639083	-4.054400372	-1.837842662	45	MODIFIER	MODERATE	NO	NO	NO	A	B	-2.2885126235296	-2.65886361407435	0.124849101542438	-0.165225091884584	-1.5679443784775937
AL3G31800	AT3G18500	OG0015836	.	protein_coding	Dse I-like superfamily protein	.	Dse I-like superfamily protein%3B CONTAINS InterPro DOMAIN/s: Endonuclease/exonuclease/phosphatase (InterPro:IPR005135)%3B BEST Arabidopsis thaliana protein match is: Dse I-like superfamily protein (TAIR:AT1G73875.1)%3B Has 1180 Blast hits to 1142 proteins in 213 species: Archae - 0%3B Bacteria - 8%3B Metazoa - 512%3B Fungi - 213%3B Plants - 283%3B Viruses - 0%3B Other Eukaryotes - 164 (source: N…	.	Dse I-like superfamily protein%3B CONTAINS InterPro DOMAIN/s: Endonuclease/exonuclease/phosphatase (InterPro:IPR005135)%3B BEST Arabidopsis thaliana protein match is: Dse I-like superfamily protein (TAIR:AT1G73875.1)%3B Has 1180 Blast hits to 1142 proteins in 213 species: Archae - 0%3B Bacteria - 8%3B Metazoa - 512%3B Fungi - 213%3B Plants - 283%3B Viruses - 0%3B Other Eukaryotes - 164 (source: N…	scaffold_3	7929955	7932920	2966	+	scaffold_3	7931549	7932083	535	*	0.935811435	-0.030934724	225.9072304	0.946571429	5.834237565	0.012212842	2.5455	0.409428571	0.946571429	0.004	0.036043956	0.678	0.268571429	-2.417865919	-3.045173084	-4.019818721	-1.86372777	36	MODIFIER	MODERATE	NO	NO	NO	A	B	-2.316885413175	-2.92252974680785	-2.17110471495832	0.140441328101897	-1.596317168122994
AL3G31800	AT3G18500	OG0015836	.	protein_coding	Dse I-like superfamily protein	.	Dse I-like superfamily protein%3B CONTAINS InterPro DOMAIN/s: Endonuclease/exonuclease/phosphatase (InterPro:IPR005135)%3B BEST Arabidopsis thaliana protein match is: Dse I-like superfamily protein (TAIR:AT1G73875.1)%3B Has 1180 Blast hits to 1142 proteins in 213 species: Archae - 0%3B Bacteria - 8%3B Metazoa - 512%3B Fungi - 213%3B Plants - 283%3B Viruses - 0%3B Other Eukaryotes - 164 (source: N…	.	Dse I-like superfamily protein%3B CONTAINS InterPro DOMAIN/s: Endonuclease/exonuclease/phosphatase (InterPro:IPR005135)%3B BEST Arabidopsis thaliana protein match is: Dse I-like superfamily protein (TAIR:AT1G73875.1)%3B Has 1180 Blast hits to 1142 proteins in 213 species: Archae - 0%3B Bacteria - 8%3B Metazoa - 512%3B Fungi - 213%3B Plants - 283%3B Viruses - 0%3B Other Eukaryotes - 164 (source: N…	scaffold_3	7929955	7932920	2966	+	scaffold_3	7932085	7932683	599	*	0.927142857	-0.037895524	229.146866	0.931428571	5.800232658	0.012212842	0	0.428571429	0.931428571	0	0.021098901	0.68	0.251428571	-2.452671681	-3.208639083	-4.054400372	-1.837842662	43	MODIFIER	MODERATE	NO	NO	NO	A	B	-2.2885126235296	-2.65886361407435	0.124849101542438	-0.165225091884584	-1.5679443784775937
AL3G31800	AT3G18500	OG0015836	.	protein_coding	Dse I-like superfamily protein	.	Dse I-like superfamily protein%3B CONTAINS InterPro DOMAIN/s: Endonuclease/exonuclease/phosphatase (InterPro:IPR005135)%3B BEST Arabidopsis thaliana protein match is: Dse I-like superfamily protein (TAIR:AT1G73875.1)%3B Has 1180 Blast hits to 1142 proteins in 213 species: Archae - 0%3B Bacteria - 8%3B Metazoa - 512%3B Fungi - 213%3B Plants - 283%3B Viruses - 0%3B Other Eukaryotes - 164 (source: N…	.	Dse I-like superfamily protein%3B CONTAINS InterPro DOMAIN/s: Endonuclease/exonuclease/phosphatase (InterPro:IPR005135)%3B BEST Arabidopsis thaliana protein match is: Dse I-like superfamily protein (TAIR:AT1G73875.1)%3B Has 1180 Blast hits to 1142 proteins in 213 species: Archae - 0%3B Bacteria - 8%3B Metazoa - 512%3B Fungi - 213%3B Plants - 283%3B Viruses - 0%3B Other Eukaryotes - 164 (source: N…	scaffold_3	7929955	7932920	2966	+	scaffold_3	7930411	7930841	431	*	0.946481481	-0.011531859	233.6437175	0.96	5.937869762	0.012212842	0	0.12	0.96	0.021052632	0.021538462	0.54	0.42	-2.269483458	-3.20383126	-3.100423814	-3.17092572	28	MODIFIER	MODERATE	NO	NO	NO	A	B	-2.30742781662653	-2.84647220851934	-0.361850785826386	0.173486346478813	-1.586859571574524
AL3G33250	AT3G19800	OG0016320	.	protein_coding	E3 ubiquitin-protein ligase%2C putative (DUF177)	.	Protein of unknown function (DUF177)%3B CONTAINS InterPro DOMAIN/s: Protein of unknown function DUF177 (InterPro:IPR003772)%3B Has 29 Blast hits to 29 proteins in 11 species: Archae - 0%3B Bacteria - 0%3B Metazoa - 0%3B Fungi - 0%3B Plants - 29%3B Viruses - 0%3B Other Eukaryotes - 0 (source: NCBI BLink).	.	Protein of unknown function (DUF177)%3B CONTAINS InterPro DOMAIN/s: Protein of unknown function DUF177 (InterPro:IPR003772)%3B Has 29 Blast hits to 29 proteins in 11 species: Archae - 0%3B Bacteria - 0%3B Metazoa - 0%3B Fungi - 0%3B Plants - 29%3B Viruses - 0%3B Other Eukaryotes - 0 (source: NCBI BLink).	scaffold_3	8561544	8563138	1595	+	scaffold_3	8562646	8563415	770	*	0.242088853	-0.19715904	286.6599985	0.558285714	1.357359919	0.208084794	15.6185	0.434857143	0.465142857	0.335578947	0.336263736	0.632	0.197142857	0.467348592	0.23857038	-1.867409112	0.912450054	91	MODIFIER	MODERATE	NO	NO	NO	C	A	0.482563165171843	0.353014902150693	-3.31379140704164	1.18962066156901	1.203131410223849
AL3G43820	AT2G06530	OG0014340	VPS2.1	protein_coding	SNF7 family protein	.	VPS2.1%3B CONTAINS InterPro DOMAIN/s: Snf7 (InterPro:IPR005024)%3B BEST Arabidopsis thaliana protein match is: vacuolar protein sorting-associated protein 2.3 (TAIR:AT1G03950.1)%3B Has 2524 Blast hits to 2516 proteins in 271 species: Archae - 17%3B Bacteria - 20%3B Metazoa - 1106%3B Fungi - 512%3B Plants - 555%3B Viruses - 5%3B Other Eukaryotes - 309 (source: NCBI BLink).	.	VPS2.1%3B CONTAINS InterPro DOMAIN/s: Snf7 (InterPro:IPR005024)%3B BEST Arabidopsis thaliana protein match is: vacuolar protein sorting-associated protein 2.3 (TAIR:AT1G03950.1)%3B Has 2524 Blast hits to 2516 proteins in 271 species: Archae - 17%3B Bacteria - 20%3B Metazoa - 1106%3B Fungi - 512%3B Plants - 555%3B Viruses - 5%3B Other Eukaryotes - 309 (source: NCBI BLink).	scaffold_3	14705560	14707721	2162	-	scaffold_3	14706757	14706921	165	*	0.834826289	-0.044137426	215.2451173	0.881714286	4.753217865	0.012212842	29.5592	0.880857143	0.880857143	0.004	0.150769231	0.998	0.117142857	-2.417865919	-1.790331145	-5.927771837	0.181195755	97	MODIFIER	NO	NO	NO	NO	C	B	0.840060314703972	-1.85772421076869	-1.03053410934182	-0.437846493494148	1.5606285597559781
AL3G43820	AT2G06530	OG0014340	VPS2.1	protein_coding	SNF7 family protein	.	VPS2.1%3B CONTAINS InterPro DOMAIN/s: Snf7 (InterPro:IPR005024)%3B BEST Arabidopsis thaliana protein match is: vacuolar protein sorting-associated protein 2.3 (TAIR:AT1G03950.1)%3B Has 2524 Blast hits to 2516 proteins in 271 species: Archae - 17%3B Bacteria - 20%3B Metazoa - 1106%3B Fungi - 512%3B Plants - 555%3B Viruses - 5%3B Other Eukaryotes - 309 (source: NCBI BLink).	.	VPS2.1%3B CONTAINS InterPro DOMAIN/s: Snf7 (InterPro:IPR005024)%3B BEST Arabidopsis thaliana protein match is: vacuolar protein sorting-associated protein 2.3 (TAIR:AT1G03950.1)%3B Has 2524 Blast hits to 2516 proteins in 271 species: Archae - 17%3B Bacteria - 20%3B Metazoa - 1106%3B Fungi - 512%3B Plants - 555%3B Viruses - 5%3B Other Eukaryotes - 309 (source: NCBI BLink).	scaffold_3	14705560	14707721	2162	-	scaffold_3	14706757	14706921	165	*	0.834826289	-0.044137426	215.2451173	0.881714286	4.753217865	0.012212842	29.5592	0.880857143	0.880857143	0.004	0.150769231	0.998	0.117142857	-2.417865919	-1.790331145	-5.927771837	0.181195755	81	MODIFIER	NO	NO	NO	NO	C	B	0.840060314703972	-1.85772421076869	-1.03053410934182	-0.437846493494148	1.5606285597559781
AL3G43820	AT2G06530	OG0014340	VPS2.1	protein_coding	SNF7 family protein	.	VPS2.1%3B CONTAINS InterPro DOMAIN/s: Snf7 (InterPro:IPR005024)%3B BEST Arabidopsis thaliana protein match is: vacuolar protein sorting-associated protein 2.3 (TAIR:AT1G03950.1)%3B Has 2524 Blast hits to 2516 proteins in 271 species: Archae - 17%3B Bacteria - 20%3B Metazoa - 1106%3B Fungi - 512%3B Plants - 555%3B Viruses - 5%3B Other Eukaryotes - 309 (source: NCBI BLink).	.	VPS2.1%3B CONTAINS InterPro DOMAIN/s: Snf7 (InterPro:IPR005024)%3B BEST Arabidopsis thaliana protein match is: vacuolar protein sorting-associated protein 2.3 (TAIR:AT1G03950.1)%3B Has 2524 Blast hits to 2516 proteins in 271 species: Archae - 17%3B Bacteria - 20%3B Metazoa - 1106%3B Fungi - 512%3B Plants - 555%3B Viruses - 5%3B Other Eukaryotes - 309 (source: NCBI BLink).	scaffold_3	14705560	14707721	2162	-	scaffold_3	14706757	14706921	165	*	0.834826289	-0.044137426	215.2451173	0.881714286	4.753217865	0.012212842	29.5592	0.880857143	0.880857143	0.004	0.150769231	0.998	0.117142857	-2.417865919	-1.790331145	-5.927771837	0.181195755	80	MODIFIER	NO	NO	NO	NO	C	B	0.840060314703972	-1.85772421076869	-1.03053410934182	-0.437846493494148	1.5606285597559781
AL3G50630	AT4G35655	OG0000798	.	protein_coding	RPM1-interacting protein 4 (RIN4) family protein	.	RPM1-interacting protein 4 (RIN4) family protein%3B FUNCTIONS IN: molecular_function unknown%3B INVOLVED IN: biological_process unknown%3B LOCATED IN: cellular_component unknown%3B CONTAINS InterPro DOMAIN/s: RPM1-interacting protein 4%2C defence response (InterPro:IPR008700)%3B BEST Arabidopsis thaliana protein match is: RPM1-interacting protein 4 (RIN4) family protein (TAIR:AT2G17660.1)%3B Has …	.	RPM1-interacting protein 4 (RIN4) family protein%3B FUNCTIONS IN: molecular_function unknown%3B INVOLVED IN: biological_process unknown%3B LOCATED IN: cellular_component unknown%3B CONTAINS InterPro DOMAIN/s: RPM1-interacting protein 4%2C defence response (InterPro:IPR008700)%3B BEST Arabidopsis thaliana protein match is: RPM1-interacting protein 4 (RIN4) family protein (TAIR:AT2G17660.1)%3B Has …	scaffold_3	22183069	22183495	427	+	scaffold_3	22183316	22183876	561	*	0.991168831	-0.025266852	244.2541488	0.994285714	6.187345861	0.012212842	0	0.125714286	0.994285714	0	0.010549451	0.56	0.434285714	-2.452671681	-3.324026848	-3.338917953	-3.36506403	11	MODIFIER	MODERATE	NO	NO	NO	A	B	-2.5325186144801	-2.93774125446556	0	-0.421323984305691	-1.811950369428094
AL3G50630	AT4G35655	OG0000798	.	protein_coding	RPM1-interacting protein 4 (RIN4) family protein	.	RPM1-interacting protein 4 (RIN4) family protein%3B FUNCTIONS IN: molecular_function unknown%3B INVOLVED IN: biological_process unknown%3B LOCATED IN: cellular_component unknown%3B CONTAINS InterPro DOMAIN/s: RPM1-interacting protein 4%2C defence response (InterPro:IPR008700)%3B BEST Arabidopsis thaliana protein match is: RPM1-interacting protein 4 (RIN4) family protein (TAIR:AT2G17660.1)%3B Has …	.	RPM1-interacting protein 4 (RIN4) family protein%3B FUNCTIONS IN: molecular_function unknown%3B INVOLVED IN: biological_process unknown%3B LOCATED IN: cellular_component unknown%3B CONTAINS InterPro DOMAIN/s: RPM1-interacting protein 4%2C defence response (InterPro:IPR008700)%3B BEST Arabidopsis thaliana protein match is: RPM1-interacting protein 4 (RIN4) family protein (TAIR:AT2G17660.1)%3B Has …	scaffold_3	22183069	22183495	427	+	scaffold_3	22182406	22183297	892	*	0.944427586	-2.34101E-4	239.1491767	0.958	5.982503335	0.012212842	3.5556	-0.162	0.958	0.033473684	0	0.398	0.56	-2.161402407	-3.439414612	-2.183413847	-4.439296008	29	MODIFIER	NO	NO	NO	NO	A	B	-1.93101547399746	-2.93774125446556	-0.342806007624997	-0.421323984305691	-1.210447228945454
AL3G50630	AT4G35655	OG0000798	.	protein_coding	RPM1-interacting protein 4 (RIN4) family protein	.	RPM1-interacting protein 4 (RIN4) family protein%3B FUNCTIONS IN: molecular_function unknown%3B INVOLVED IN: biological_process unknown%3B LOCATED IN: cellular_component unknown%3B CONTAINS InterPro DOMAIN/s: RPM1-interacting protein 4%2C defence response (InterPro:IPR008700)%3B BEST Arabidopsis thaliana protein match is: RPM1-interacting protein 4 (RIN4) family protein (TAIR:AT2G17660.1)%3B Has …	.	RPM1-interacting protein 4 (RIN4) family protein%3B FUNCTIONS IN: molecular_function unknown%3B INVOLVED IN: biological_process unknown%3B LOCATED IN: cellular_component unknown%3B CONTAINS InterPro DOMAIN/s: RPM1-interacting protein 4%2C defence response (InterPro:IPR008700)%3B BEST Arabidopsis thaliana protein match is: RPM1-interacting protein 4 (RIN4) family protein (TAIR:AT2G17660.1)%3B Has …	scaffold_3	22183069	22183495	427	+	scaffold_3	22182406	22183297	892	*	0.944427586	-2.34101E-4	239.1491767	0.958	5.982503335	0.012212842	3.5556	-0.162	0.958	0.033473684	0	0.398	0.56	-2.161402407	-3.439414612	-2.183413847	-4.439296008	28	MODIFIER	NO	NO	NO	NO	B	B	-1.93101547399746	-2.93774125446556	-0.342806007624997	-0.421323984305691	-1.210447228945454
AL3G50630	AT4G35655	OG0000798	.	protein_coding	RPM1-interacting protein 4 (RIN4) family protein	.	RPM1-interacting protein 4 (RIN4) family protein%3B FUNCTIONS IN: molecular_function unknown%3B INVOLVED IN: biological_process unknown%3B LOCATED IN: cellular_component unknown%3B CONTAINS InterPro DOMAIN/s: RPM1-interacting protein 4%2C defence response (InterPro:IPR008700)%3B BEST Arabidopsis thaliana protein match is: RPM1-interacting protein 4 (RIN4) family protein (TAIR:AT2G17660.1)%3B Has …	.	RPM1-interacting protein 4 (RIN4) family protein%3B FUNCTIONS IN: molecular_function unknown%3B INVOLVED IN: biological_process unknown%3B LOCATED IN: cellular_component unknown%3B CONTAINS InterPro DOMAIN/s: RPM1-interacting protein 4%2C defence response (InterPro:IPR008700)%3B BEST Arabidopsis thaliana protein match is: RPM1-interacting protein 4 (RIN4) family protein (TAIR:AT2G17660.1)%3B Has …	scaffold_3	22183069	22183495	427	+	scaffold_3	22183316	22183876	561	*	0.991168831	-0.025266852	244.2541488	0.994285714	6.187345861	0.012212842	0	0.125714286	0.994285714	0	0.010549451	0.56	0.434285714	-2.452671681	-3.324026848	-3.338917953	-3.36506403	8	MODIFIER	MODERATE	NO	NO	NO	A	B	-2.5325186144801	-2.93774125446556	0	-0.421323984305691	-1.811950369428094
AL3G50630	AT4G35655	OG0000798	.	protein_coding	RPM1-interacting protein 4 (RIN4) family protein	.	RPM1-interacting protein 4 (RIN4) family protein%3B FUNCTIONS IN: molecular_function unknown%3B INVOLVED IN: biological_process unknown%3B LOCATED IN: cellular_component unknown%3B CONTAINS InterPro DOMAIN/s: RPM1-interacting protein 4%2C defence response (InterPro:IPR008700)%3B BEST Arabidopsis thaliana protein match is: RPM1-interacting protein 4 (RIN4) family protein (TAIR:AT2G17660.1)%3B Has …	.	RPM1-interacting protein 4 (RIN4) family protein%3B FUNCTIONS IN: molecular_function unknown%3B INVOLVED IN: biological_process unknown%3B LOCATED IN: cellular_component unknown%3B CONTAINS InterPro DOMAIN/s: RPM1-interacting protein 4%2C defence response (InterPro:IPR008700)%3B BEST Arabidopsis thaliana protein match is: RPM1-interacting protein 4 (RIN4) family protein (TAIR:AT2G17660.1)%3B Has …	scaffold_3	22183069	22183495	427	+	scaffold_3	22182406	22183297	892	*	0.944427586	-2.34101E-4	239.1491767	0.958	5.982503335	0.012212842	3.5556	-0.162	0.958	0.033473684	0	0.398	0.56	-2.161402407	-3.439414612	-2.183413847	-4.439296008	28	MODIFIER	NO	NO	NO	NO	A	B	-1.93101547399746	-2.93774125446556	-0.342806007624997	-0.421323984305691	-1.210447228945454
AL3G50630	AT4G35655	OG0000798	.	protein_coding	RPM1-interacting protein 4 (RIN4) family protein	.	RPM1-interacting protein 4 (RIN4) family protein%3B FUNCTIONS IN: molecular_function unknown%3B INVOLVED IN: biological_process unknown%3B LOCATED IN: cellular_component unknown%3B CONTAINS InterPro DOMAIN/s: RPM1-interacting protein 4%2C defence response (InterPro:IPR008700)%3B BEST Arabidopsis thaliana protein match is: RPM1-interacting protein 4 (RIN4) family protein (TAIR:AT2G17660.1)%3B Has …	.	RPM1-interacting protein 4 (RIN4) family protein%3B FUNCTIONS IN: molecular_function unknown%3B INVOLVED IN: biological_process unknown%3B LOCATED IN: cellular_component unknown%3B CONTAINS InterPro DOMAIN/s: RPM1-interacting protein 4%2C defence response (InterPro:IPR008700)%3B BEST Arabidopsis thaliana protein match is: RPM1-interacting protein 4 (RIN4) family protein (TAIR:AT2G17660.1)%3B Has …	scaffold_3	22183069	22183495	427	+	scaffold_3	22183316	22183876	561	*	0.991168831	-0.025266852	244.2541488	0.994285714	6.187345861	0.012212842	0	0.125714286	0.994285714	0	0.010549451	0.56	0.434285714	-2.452671681	-3.324026848	-3.338917953	-3.36506403	11	MODIFIER	MODERATE	NO	NO	NO	B	B	-2.5325186144801	-2.93774125446556	0	-0.421323984305691	-1.811950369428094
AL3G50630	AT4G35655	OG0000798	.	protein_coding	RPM1-interacting protein 4 (RIN4) family protein	.	RPM1-interacting protein 4 (RIN4) family protein%3B FUNCTIONS IN: molecular_function unknown%3B INVOLVED IN: biological_process unknown%3B LOCATED IN: cellular_component unknown%3B CONTAINS InterPro DOMAIN/s: RPM1-interacting protein 4%2C defence response (InterPro:IPR008700)%3B BEST Arabidopsis thaliana protein match is: RPM1-interacting protein 4 (RIN4) family protein (TAIR:AT2G17660.1)%3B Has …	.	RPM1-interacting protein 4 (RIN4) family protein%3B FUNCTIONS IN: molecular_function unknown%3B INVOLVED IN: biological_process unknown%3B LOCATED IN: cellular_component unknown%3B CONTAINS InterPro DOMAIN/s: RPM1-interacting protein 4%2C defence response (InterPro:IPR008700)%3B BEST Arabidopsis thaliana protein match is: RPM1-interacting protein 4 (RIN4) family protein (TAIR:AT2G17660.1)%3B Has …	scaffold_3	22183069	22183495	427	+	scaffold_3	22183316	22183876	561	*	0.991168831	-0.025266852	244.2541488	0.994285714	6.187345861	0.012212842	0	0.125714286	0.994285714	0	0.010549451	0.56	0.434285714	-2.452671681	-3.324026848	-3.338917953	-3.36506403	8	MODIFIER	MODERATE	NO	NO	NO	B	B	-2.5325186144801	-2.93774125446556	0	-0.421323984305691	-1.811950369428094
AL3G50630	AT4G35655	OG0000798	.	protein_coding	RPM1-interacting protein 4 (RIN4) family protein	.	RPM1-interacting protein 4 (RIN4) family protein%3B FUNCTIONS IN: molecular_function unknown%3B INVOLVED IN: biological_process unknown%3B LOCATED IN: cellular_component unknown%3B CONTAINS InterPro DOMAIN/s: RPM1-interacting protein 4%2C defence response (InterPro:IPR008700)%3B BEST Arabidopsis thaliana protein match is: RPM1-interacting protein 4 (RIN4) family protein (TAIR:AT2G17660.1)%3B Has …	.	RPM1-interacting protein 4 (RIN4) family protein%3B FUNCTIONS IN: molecular_function unknown%3B INVOLVED IN: biological_process unknown%3B LOCATED IN: cellular_component unknown%3B CONTAINS InterPro DOMAIN/s: RPM1-interacting protein 4%2C defence response (InterPro:IPR008700)%3B BEST Arabidopsis thaliana protein match is: RPM1-interacting protein 4 (RIN4) family protein (TAIR:AT2G17660.1)%3B Has …	scaffold_3	22183069	22183495	427	+	scaffold_3	22182406	22183297	892	*	0.944427586	-2.34101E-4	239.1491767	0.958	5.982503335	0.012212842	3.5556	-0.162	0.958	0.033473684	0	0.398	0.56	-2.161402407	-3.439414612	-2.183413847	-4.439296008	29	MODIFIER	NO	NO	NO	NO	B	B	-1.93101547399746	-2.93774125446556	-0.342806007624997	-0.421323984305691	-1.210447228945454
AL3G50630	AT2G17660	OG0000798	.	protein_coding	RPM1-interacting protein 4 (RIN4) family protein	.	RPM1-interacting protein 4 (RIN4) family protein%3B CONTAINS InterPro DOMAIN/s: RPM1-interacting protein 4%2C defence response (InterPro:IPR008700)%3B BEST Arabidopsis thaliana protein match is: RPM1-interacting protein 4 (RIN4) family protein (TAIR:AT4G35655.1)%3B Has 277 Blast hits to 276 proteins in 36 species: Archae - 0%3B Bacteria - 0%3B Metazoa - 0%3B Fungi - 0%3B Plants - 275%3B Viruses -…	.	RPM1-interacting protein 4 (RIN4) family protein%3B CONTAINS InterPro DOMAIN/s: RPM1-interacting protein 4%2C defence response (InterPro:IPR008700)%3B BEST Arabidopsis thaliana protein match is: RPM1-interacting protein 4 (RIN4) family protein (TAIR:AT4G35655.1)%3B Has 277 Blast hits to 276 proteins in 36 species: Archae - 0%3B Bacteria - 0%3B Metazoa - 0%3B Fungi - 0%3B Plants - 275%3B Viruses -…	scaffold_3	22183069	22183495	427	+	scaffold_3	22183316	22183876	561	*	0.991168831	-0.025266852	244.2541488	0.994285714	6.187345861	0.012212842	0	0.125714286	0.994285714	0	0.010549451	0.56	0.434285714	-2.452671681	-3.324026848	-3.338917953	-3.36506403	11	MODIFIER	MODERATE	NO	NO	NO	A	B	-2.5325186144801	-2.93774125446556	0	-0.421323984305691	-1.811950369428094
AL3G50630	AT2G17660	OG0000798	.	protein_coding	RPM1-interacting protein 4 (RIN4) family protein	.	RPM1-interacting protein 4 (RIN4) family protein%3B CONTAINS InterPro DOMAIN/s: RPM1-interacting protein 4%2C defence response (InterPro:IPR008700)%3B BEST Arabidopsis thaliana protein match is: RPM1-interacting protein 4 (RIN4) family protein (TAIR:AT4G35655.1)%3B Has 277 Blast hits to 276 proteins in 36 species: Archae - 0%3B Bacteria - 0%3B Metazoa - 0%3B Fungi - 0%3B Plants - 275%3B Viruses -…	.	RPM1-interacting protein 4 (RIN4) family protein%3B CONTAINS InterPro DOMAIN/s: RPM1-interacting protein 4%2C defence response (InterPro:IPR008700)%3B BEST Arabidopsis thaliana protein match is: RPM1-interacting protein 4 (RIN4) family protein (TAIR:AT4G35655.1)%3B Has 277 Blast hits to 276 proteins in 36 species: Archae - 0%3B Bacteria - 0%3B Metazoa - 0%3B Fungi - 0%3B Plants - 275%3B Viruses -…	scaffold_3	22183069	22183495	427	+	scaffold_3	22182406	22183297	892	*	0.944427586	-2.34101E-4	239.1491767	0.958	5.982503335	0.012212842	3.5556	-0.162	0.958	0.033473684	0	0.398	0.56	-2.161402407	-3.439414612	-2.183413847	-4.439296008	29	MODIFIER	NO	NO	NO	NO	A	B	-1.93101547399746	-2.93774125446556	-0.342806007624997	-0.421323984305691	-1.210447228945454
AL3G50630	AT2G17660	OG0000798	.	protein_coding	RPM1-interacting protein 4 (RIN4) family protein	.	RPM1-interacting protein 4 (RIN4) family protein%3B CONTAINS InterPro DOMAIN/s: RPM1-interacting protein 4%2C defence response (InterPro:IPR008700)%3B BEST Arabidopsis thaliana protein match is: RPM1-interacting protein 4 (RIN4) family protein (TAIR:AT4G35655.1)%3B Has 277 Blast hits to 276 proteins in 36 species: Archae - 0%3B Bacteria - 0%3B Metazoa - 0%3B Fungi - 0%3B Plants - 275%3B Viruses -…	.	RPM1-interacting protein 4 (RIN4) family protein%3B CONTAINS InterPro DOMAIN/s: RPM1-interacting protein 4%2C defence response (InterPro:IPR008700)%3B BEST Arabidopsis thaliana protein match is: RPM1-interacting protein 4 (RIN4) family protein (TAIR:AT4G35655.1)%3B Has 277 Blast hits to 276 proteins in 36 species: Archae - 0%3B Bacteria - 0%3B Metazoa - 0%3B Fungi - 0%3B Plants - 275%3B Viruses -…	scaffold_3	22183069	22183495	427	+	scaffold_3	22182406	22183297	892	*	0.944427586	-2.34101E-4	239.1491767	0.958	5.982503335	0.012212842	3.5556	-0.162	0.958	0.033473684	0	0.398	0.56	-2.161402407	-3.439414612	-2.183413847	-4.439296008	28	MODIFIER	NO	NO	NO	NO	B	B	-1.93101547399746	-2.93774125446556	-0.342806007624997	-0.421323984305691	-1.210447228945454
AL3G50630	AT2G17660	OG0000798	.	protein_coding	RPM1-interacting protein 4 (RIN4) family protein	.	RPM1-interacting protein 4 (RIN4) family protein%3B CONTAINS InterPro DOMAIN/s: RPM1-interacting protein 4%2C defence response (InterPro:IPR008700)%3B BEST Arabidopsis thaliana protein match is: RPM1-interacting protein 4 (RIN4) family protein (TAIR:AT4G35655.1)%3B Has 277 Blast hits to 276 proteins in 36 species: Archae - 0%3B Bacteria - 0%3B Metazoa - 0%3B Fungi - 0%3B Plants - 275%3B Viruses -…	.	RPM1-interacting protein 4 (RIN4) family protein%3B CONTAINS InterPro DOMAIN/s: RPM1-interacting protein 4%2C defence response (InterPro:IPR008700)%3B BEST Arabidopsis thaliana protein match is: RPM1-interacting protein 4 (RIN4) family protein (TAIR:AT4G35655.1)%3B Has 277 Blast hits to 276 proteins in 36 species: Archae - 0%3B Bacteria - 0%3B Metazoa - 0%3B Fungi - 0%3B Plants - 275%3B Viruses -…	scaffold_3	22183069	22183495	427	+	scaffold_3	22183316	22183876	561	*	0.991168831	-0.025266852	244.2541488	0.994285714	6.187345861	0.012212842	0	0.125714286	0.994285714	0	0.010549451	0.56	0.434285714	-2.452671681	-3.324026848	-3.338917953	-3.36506403	8	MODIFIER	MODERATE	NO	NO	NO	A	B	-2.5325186144801	-2.93774125446556	0	-0.421323984305691	-1.811950369428094
AL3G50630	AT2G17660	OG0000798	.	protein_coding	RPM1-interacting protein 4 (RIN4) family protein	.	RPM1-interacting protein 4 (RIN4) family protein%3B CONTAINS InterPro DOMAIN/s: RPM1-interacting protein 4%2C defence response (InterPro:IPR008700)%3B BEST Arabidopsis thaliana protein match is: RPM1-interacting protein 4 (RIN4) family protein (TAIR:AT4G35655.1)%3B Has 277 Blast hits to 276 proteins in 36 species: Archae - 0%3B Bacteria - 0%3B Metazoa - 0%3B Fungi - 0%3B Plants - 275%3B Viruses -…	.	RPM1-interacting protein 4 (RIN4) family protein%3B CONTAINS InterPro DOMAIN/s: RPM1-interacting protein 4%2C defence response (InterPro:IPR008700)%3B BEST Arabidopsis thaliana protein match is: RPM1-interacting protein 4 (RIN4) family protein (TAIR:AT4G35655.1)%3B Has 277 Blast hits to 276 proteins in 36 species: Archae - 0%3B Bacteria - 0%3B Metazoa - 0%3B Fungi - 0%3B Plants - 275%3B Viruses -…	scaffold_3	22183069	22183495	427	+	scaffold_3	22182406	22183297	892	*	0.944427586	-2.34101E-4	239.1491767	0.958	5.982503335	0.012212842	3.5556	-0.162	0.958	0.033473684	0	0.398	0.56	-2.161402407	-3.439414612	-2.183413847	-4.439296008	28	MODIFIER	NO	NO	NO	NO	A	B	-1.93101547399746	-2.93774125446556	-0.342806007624997	-0.421323984305691	-1.210447228945454
AL3G50630	AT2G17660	OG0000798	.	protein_coding	RPM1-interacting protein 4 (RIN4) family protein	.	RPM1-interacting protein 4 (RIN4) family protein%3B CONTAINS InterPro DOMAIN/s: RPM1-interacting protein 4%2C defence response (InterPro:IPR008700)%3B BEST Arabidopsis thaliana protein match is: RPM1-interacting protein 4 (RIN4) family protein (TAIR:AT4G35655.1)%3B Has 277 Blast hits to 276 proteins in 36 species: Archae - 0%3B Bacteria - 0%3B Metazoa - 0%3B Fungi - 0%3B Plants - 275%3B Viruses -…	.	RPM1-interacting protein 4 (RIN4) family protein%3B CONTAINS InterPro DOMAIN/s: RPM1-interacting protein 4%2C defence response (InterPro:IPR008700)%3B BEST Arabidopsis thaliana protein match is: RPM1-interacting protein 4 (RIN4) family protein (TAIR:AT4G35655.1)%3B Has 277 Blast hits to 276 proteins in 36 species: Archae - 0%3B Bacteria - 0%3B Metazoa - 0%3B Fungi - 0%3B Plants - 275%3B Viruses -…	scaffold_3	22183069	22183495	427	+	scaffold_3	22183316	22183876	561	*	0.991168831	-0.025266852	244.2541488	0.994285714	6.187345861	0.012212842	0	0.125714286	0.994285714	0	0.010549451	0.56	0.434285714	-2.452671681	-3.324026848	-3.338917953	-3.36506403	11	MODIFIER	MODERATE	NO	NO	NO	B	B	-2.5325186144801	-2.93774125446556	0	-0.421323984305691	-1.811950369428094
AL3G50630	AT2G17660	OG0000798	.	protein_coding	RPM1-interacting protein 4 (RIN4) family protein	.	RPM1-interacting protein 4 (RIN4) family protein%3B CONTAINS InterPro DOMAIN/s: RPM1-interacting protein 4%2C defence response (InterPro:IPR008700)%3B BEST Arabidopsis thaliana protein match is: RPM1-interacting protein 4 (RIN4) family protein (TAIR:AT4G35655.1)%3B Has 277 Blast hits to 276 proteins in 36 species: Archae - 0%3B Bacteria - 0%3B Metazoa - 0%3B Fungi - 0%3B Plants - 275%3B Viruses -…	.	RPM1-interacting protein 4 (RIN4) family protein%3B CONTAINS InterPro DOMAIN/s: RPM1-interacting protein 4%2C defence response (InterPro:IPR008700)%3B BEST Arabidopsis thaliana protein match is: RPM1-interacting protein 4 (RIN4) family protein (TAIR:AT4G35655.1)%3B Has 277 Blast hits to 276 proteins in 36 species: Archae - 0%3B Bacteria - 0%3B Metazoa - 0%3B Fungi - 0%3B Plants - 275%3B Viruses -…	scaffold_3	22183069	22183495	427	+	scaffold_3	22183316	22183876	561	*	0.991168831	-0.025266852	244.2541488	0.994285714	6.187345861	0.012212842	0	0.125714286	0.994285714	0	0.010549451	0.56	0.434285714	-2.452671681	-3.324026848	-3.338917953	-3.36506403	8	MODIFIER	MODERATE	NO	NO	NO	B	B	-2.5325186144801	-2.93774125446556	0	-0.421323984305691	-1.811950369428094
AL3G50630	AT2G17660	OG0000798	.	protein_coding	RPM1-interacting protein 4 (RIN4) family protein	.	RPM1-interacting protein 4 (RIN4) family protein%3B CONTAINS InterPro DOMAIN/s: RPM1-interacting protein 4%2C defence response (InterPro:IPR008700)%3B BEST Arabidopsis thaliana protein match is: RPM1-interacting protein 4 (RIN4) family protein (TAIR:AT4G35655.1)%3B Has 277 Blast hits to 276 proteins in 36 species: Archae - 0%3B Bacteria - 0%3B Metazoa - 0%3B Fungi - 0%3B Plants - 275%3B Viruses -…	.	RPM1-interacting protein 4 (RIN4) family protein%3B CONTAINS InterPro DOMAIN/s: RPM1-interacting protein 4%2C defence response (InterPro:IPR008700)%3B BEST Arabidopsis thaliana protein match is: RPM1-interacting protein 4 (RIN4) family protein (TAIR:AT4G35655.1)%3B Has 277 Blast hits to 276 proteins in 36 species: Archae - 0%3B Bacteria - 0%3B Metazoa - 0%3B Fungi - 0%3B Plants - 275%3B Viruses -…	scaffold_3	22183069	22183495	427	+	scaffold_3	22182406	22183297	892	*	0.944427586	-2.34101E-4	239.1491767	0.958	5.982503335	0.012212842	3.5556	-0.162	0.958	0.033473684	0	0.398	0.56	-2.161402407	-3.439414612	-2.183413847	-4.439296008	29	MODIFIER	NO	NO	NO	NO	B	B	-1.93101547399746	-2.93774125446556	-0.342806007624997	-0.421323984305691	-1.210447228945454
AL3G50640	AT2G17670	OG0016109	.	protein_coding	Tetratricopeptide repeat (TPR)-like superfamily protein	.	Tetratricopeptide repeat (TPR)-like superfamily protein%3B CONTAINS InterPro DOMAIN/s: Pentatricopeptide repeat (InterPro:IPR002885)%3B BEST Arabidopsis thaliana protein match is: Pentatricopeptide repeat (PPR) superfamily protein (TAIR:AT3G53700.1)%3B Has 45396 Blast hits to 13729 proteins in 280 species: Archae - 5%3B Bacteria - 33%3B Metazoa - 451%3B Fungi - 602%3B Plants - 42971%3B Viruses - …	.	Tetratricopeptide repeat (TPR)-like superfamily protein%3B CONTAINS InterPro DOMAIN/s: Pentatricopeptide repeat (InterPro:IPR002885)%3B BEST Arabidopsis thaliana protein match is: Pentatricopeptide repeat (PPR) superfamily protein (TAIR:AT3G53700.1)%3B Has 45396 Blast hits to 13729 proteins in 280 species: Archae - 5%3B Bacteria - 33%3B Metazoa - 451%3B Fungi - 602%3B Plants - 42971%3B Viruses - …	scaffold_3	22183929	22185711	1783	+	scaffold_3	22183316	22183876	561	*	0.991168831	-0.025266852	244.2541488	0.994285714	6.187345861	0.012212842	0	0.125714286	0.994285714	0	0.010549451	0.56	0.434285714	-2.452671681	-3.324026848	-3.338917953	-3.36506403	11	MODIFIER	NO	NO	NO	NO	C	B	-2.5325186144801	-2.93774125446556	0	-0.421323984305691	-1.811950369428094
AL3G50640	AT2G17670	OG0016109	.	protein_coding	Tetratricopeptide repeat (TPR)-like superfamily protein	.	Tetratricopeptide repeat (TPR)-like superfamily protein%3B CONTAINS InterPro DOMAIN/s: Pentatricopeptide repeat (InterPro:IPR002885)%3B BEST Arabidopsis thaliana protein match is: Pentatricopeptide repeat (PPR) superfamily protein (TAIR:AT3G53700.1)%3B Has 45396 Blast hits to 13729 proteins in 280 species: Archae - 5%3B Bacteria - 33%3B Metazoa - 451%3B Fungi - 602%3B Plants - 42971%3B Viruses - …	.	Tetratricopeptide repeat (TPR)-like superfamily protein%3B CONTAINS InterPro DOMAIN/s: Pentatricopeptide repeat (InterPro:IPR002885)%3B BEST Arabidopsis thaliana protein match is: Pentatricopeptide repeat (PPR) superfamily protein (TAIR:AT3G53700.1)%3B Has 45396 Blast hits to 13729 proteins in 280 species: Archae - 5%3B Bacteria - 33%3B Metazoa - 451%3B Fungi - 602%3B Plants - 42971%3B Viruses - …	scaffold_3	22183929	22185711	1783	+	scaffold_3	22182406	22183297	892	*	0.944427586	-2.34101E-4	239.1491767	0.958	5.982503335	0.012212842	3.5556	-0.162	0.958	0.033473684	0	0.398	0.56	-2.161402407	-3.439414612	-2.183413847	-4.439296008	29	MODIFIER	NO	NO	NO	NO	C	B	-1.93101547399746	-2.93774125446556	-0.342806007624997	-0.421323984305691	-1.210447228945454
AL3G50640	AT2G17670	OG0016109	.	protein_coding	Tetratricopeptide repeat (TPR)-like superfamily protein	.	Tetratricopeptide repeat (TPR)-like superfamily protein%3B CONTAINS InterPro DOMAIN/s: Pentatricopeptide repeat (InterPro:IPR002885)%3B BEST Arabidopsis thaliana protein match is: Pentatricopeptide repeat (PPR) superfamily protein (TAIR:AT3G53700.1)%3B Has 45396 Blast hits to 13729 proteins in 280 species: Archae - 5%3B Bacteria - 33%3B Metazoa - 451%3B Fungi - 602%3B Plants - 42971%3B Viruses - …	.	Tetratricopeptide repeat (TPR)-like superfamily protein%3B CONTAINS InterPro DOMAIN/s: Pentatricopeptide repeat (InterPro:IPR002885)%3B BEST Arabidopsis thaliana protein match is: Pentatricopeptide repeat (PPR) superfamily protein (TAIR:AT3G53700.1)%3B Has 45396 Blast hits to 13729 proteins in 280 species: Archae - 5%3B Bacteria - 33%3B Metazoa - 451%3B Fungi - 602%3B Plants - 42971%3B Viruses - …	scaffold_3	22183929	22185711	1783	+	scaffold_3	22182406	22183297	892	*	0.944427586	-2.34101E-4	239.1491767	0.958	5.982503335	0.012212842	3.5556	-0.162	0.958	0.033473684	0	0.398	0.56	-2.161402407	-3.439414612	-2.183413847	-4.439296008	28	MODIFIER	NO	NO	NO	NO	C	B	-1.93101547399746	-2.93774125446556	-0.342806007624997	-0.421323984305691	-1.210447228945454
AL3G50640	AT2G17670	OG0016109	.	protein_coding	Tetratricopeptide repeat (TPR)-like superfamily protein	.	Tetratricopeptide repeat (TPR)-like superfamily protein%3B CONTAINS InterPro DOMAIN/s: Pentatricopeptide repeat (InterPro:IPR002885)%3B BEST Arabidopsis thaliana protein match is: Pentatricopeptide repeat (PPR) superfamily protein (TAIR:AT3G53700.1)%3B Has 45396 Blast hits to 13729 proteins in 280 species: Archae - 5%3B Bacteria - 33%3B Metazoa - 451%3B Fungi - 602%3B Plants - 42971%3B Viruses - …	.	Tetratricopeptide repeat (TPR)-like superfamily protein%3B CONTAINS InterPro DOMAIN/s: Pentatricopeptide repeat (InterPro:IPR002885)%3B BEST Arabidopsis thaliana protein match is: Pentatricopeptide repeat (PPR) superfamily protein (TAIR:AT3G53700.1)%3B Has 45396 Blast hits to 13729 proteins in 280 species: Archae - 5%3B Bacteria - 33%3B Metazoa - 451%3B Fungi - 602%3B Plants - 42971%3B Viruses - …	scaffold_3	22183929	22185711	1783	+	scaffold_3	22183316	22183876	561	*	0.991168831	-0.025266852	244.2541488	0.994285714	6.187345861	0.012212842	0	0.125714286	0.994285714	0	0.010549451	0.56	0.434285714	-2.452671681	-3.324026848	-3.338917953	-3.36506403	8	MODIFIER	NO	NO	NO	NO	C	B	-2.5325186144801	-2.93774125446556	0	-0.421323984305691	-1.811950369428094
AL3G51540	AT2G18280	OG0017426	TLP2	protein_coding	tubby like protein 2	tubby like protein 2	tubby like protein 2 (TLP2)%3B CONTAINS InterPro DOMAIN/s: F-box domain%2C cyclin-like (InterPro:IPR001810)%2C Tubby%2C C-terminal%2C conserved site (InterPro:IPR018066)%2C Tubby%2C C-terminal (InterPro:IPR000007)%3B BEST Arabidopsis thaliana protein match is: tubby like protein 3 (TAIR:AT2G47900.3)%3B Has 957 Blast hits to 948 proteins in 117 species: Archae - 0%3B Bacteria - 0%3B Metazoa - 352%…	Member of TLP family	tubby like protein 2 (TLP2)%3B CONTAINS InterPro DOMAIN/s: F-box domain%2C cyclin-like (InterPro:IPR001810)%2C Tubby%2C C-terminal%2C conserved site (InterPro:IPR018066)%2C Tubby%2C C-terminal (InterPro:IPR000007)%3B BEST Arabidopsis thaliana protein match is: tubby like protein 3 (TAIR:AT2G47900.3)%3B Has 957 Blast hits to 948 proteins in 117 species: Archae - 0%3B Bacteria - 0%3B Metazoa - 352%…	scaffold_3	22700687	22703125	2439	+	scaffold_3	22702138	22702705	568	*	0.924724799	-0.036747463	235.7343646	0.937142857	5.688116304	0.012212842	8	-0.64	0.937142857	0	0.046593407	0.16	0.8	-2.452671681	-2.929785319	-0.953976558	-5.998873761	46	MODIFIER	MODERATE	NO	NO	NO	A	B	-2.5325186144801	-1.56870556527236	0	-1.3878907718305	-1.811950369428094
AL3G51540	AT2G18280	OG0017426	TLP2	protein_coding	tubby like protein 2	tubby like protein 2	tubby like protein 2 (TLP2)%3B CONTAINS InterPro DOMAIN/s: F-box domain%2C cyclin-like (InterPro:IPR001810)%2C Tubby%2C C-terminal%2C conserved site (InterPro:IPR018066)%2C Tubby%2C C-terminal (InterPro:IPR000007)%3B BEST Arabidopsis thaliana protein match is: tubby like protein 3 (TAIR:AT2G47900.3)%3B Has 957 Blast hits to 948 proteins in 117 species: Archae - 0%3B Bacteria - 0%3B Metazoa - 352%…	Member of TLP family	tubby like protein 2 (TLP2)%3B CONTAINS InterPro DOMAIN/s: F-box domain%2C cyclin-like (InterPro:IPR001810)%2C Tubby%2C C-terminal%2C conserved site (InterPro:IPR018066)%2C Tubby%2C C-terminal (InterPro:IPR000007)%3B BEST Arabidopsis thaliana protein match is: tubby like protein 3 (TAIR:AT2G47900.3)%3B Has 957 Blast hits to 948 proteins in 117 species: Archae - 0%3B Bacteria - 0%3B Metazoa - 352%…	scaffold_3	22700687	22703125	2439	+	scaffold_3	22701588	22702108	521	*	0.842668522	-0.049376134	194.4881106	0.874285714	4.948199654	0.012212842	20.4044	-0.342857143	0.874285714	0	0.113406593	0.28	0.622857143	-2.452671681	-2.198996144	-1.669458977	-4.102789605	84	MODIFIER	MODERATE	NO	NO	NO	A	B	-2.5325186144801	-1.56870556527236	0	-1.3878907718305	-1.811950369428094
AL3G51540	AT2G18280	OG0017426	TLP2	protein_coding	tubby like protein 2	tubby like protein 2	tubby like protein 2 (TLP2)%3B CONTAINS InterPro DOMAIN/s: F-box domain%2C cyclin-like (InterPro:IPR001810)%2C Tubby%2C C-terminal%2C conserved site (InterPro:IPR018066)%2C Tubby%2C C-terminal (InterPro:IPR000007)%3B BEST Arabidopsis thaliana protein match is: tubby like protein 3 (TAIR:AT2G47900.3)%3B Has 957 Blast hits to 948 proteins in 117 species: Archae - 0%3B Bacteria - 0%3B Metazoa - 352%…	Member of TLP family	tubby like protein 2 (TLP2)%3B CONTAINS InterPro DOMAIN/s: F-box domain%2C cyclin-like (InterPro:IPR001810)%2C Tubby%2C C-terminal%2C conserved site (InterPro:IPR018066)%2C Tubby%2C C-terminal (InterPro:IPR000007)%3B BEST Arabidopsis thaliana protein match is: tubby like protein 3 (TAIR:AT2G47900.3)%3B Has 957 Blast hits to 948 proteins in 117 species: Archae - 0%3B Bacteria - 0%3B Metazoa - 352%…	scaffold_3	22700687	22703125	2439	+	scaffold_3	22701588	22702108	521	*	0.842668522	-0.049376134	194.4881106	0.874285714	4.948199654	0.012212842	20.4044	-0.342857143	0.874285714	0	0.113406593	0.28	0.622857143	-2.452671681	-2.198996144	-1.669458977	-4.102789605	121	MODIFIER	MODERATE	NO	NO	NO	A	B	-2.5325186144801	-1.56870556527236	0	-1.3878907718305	-1.811950369428094
AL3G51540	AT2G18280	OG0017426	TLP2	protein_coding	tubby like protein 2	tubby like protein 2	tubby like protein 2 (TLP2)%3B CONTAINS InterPro DOMAIN/s: F-box domain%2C cyclin-like (InterPro:IPR001810)%2C Tubby%2C C-terminal%2C conserved site (InterPro:IPR018066)%2C Tubby%2C C-terminal (InterPro:IPR000007)%3B BEST Arabidopsis thaliana protein match is: tubby like protein 3 (TAIR:AT2G47900.3)%3B Has 957 Blast hits to 948 proteins in 117 species: Archae - 0%3B Bacteria - 0%3B Metazoa - 352%…	Member of TLP family	tubby like protein 2 (TLP2)%3B CONTAINS InterPro DOMAIN/s: F-box domain%2C cyclin-like (InterPro:IPR001810)%2C Tubby%2C C-terminal%2C conserved site (InterPro:IPR018066)%2C Tubby%2C C-terminal (InterPro:IPR000007)%3B BEST Arabidopsis thaliana protein match is: tubby like protein 3 (TAIR:AT2G47900.3)%3B Has 957 Blast hits to 948 proteins in 117 species: Archae - 0%3B Bacteria - 0%3B Metazoa - 352%…	scaffold_3	22700687	22703125	2439	+	scaffold_3	22701588	22702108	521	*	0.842668522	-0.049376134	194.4881106	0.874285714	4.948199654	0.012212842	20.4044	-0.342857143	0.874285714	0	0.113406593	0.28	0.622857143	-2.452671681	-2.198996144	-1.669458977	-4.102789605	85	MODIFIER	MODERATE	NO	NO	NO	A	B	-2.5325186144801	-1.56870556527236	0	-1.3878907718305	-1.811950369428094
AL3G51540	AT2G18280	OG0017426	TLP2	protein_coding	tubby like protein 2	tubby like protein 2	tubby like protein 2 (TLP2)%3B CONTAINS InterPro DOMAIN/s: F-box domain%2C cyclin-like (InterPro:IPR001810)%2C Tubby%2C C-terminal%2C conserved site (InterPro:IPR018066)%2C Tubby%2C C-terminal (InterPro:IPR000007)%3B BEST Arabidopsis thaliana protein match is: tubby like protein 3 (TAIR:AT2G47900.3)%3B Has 957 Blast hits to 948 proteins in 117 species: Archae - 0%3B Bacteria - 0%3B Metazoa - 352%…	Member of TLP family	tubby like protein 2 (TLP2)%3B CONTAINS InterPro DOMAIN/s: F-box domain%2C cyclin-like (InterPro:IPR001810)%2C Tubby%2C C-terminal%2C conserved site (InterPro:IPR018066)%2C Tubby%2C C-terminal (InterPro:IPR000007)%3B BEST Arabidopsis thaliana protein match is: tubby like protein 3 (TAIR:AT2G47900.3)%3B Has 957 Blast hits to 948 proteins in 117 species: Archae - 0%3B Bacteria - 0%3B Metazoa - 352%…	scaffold_3	22700687	22703125	2439	+	scaffold_3	22702138	22702705	568	*	0.924724799	-0.036747463	235.7343646	0.937142857	5.688116304	0.012212842	8	-0.64	0.937142857	0	0.046593407	0.16	0.8	-2.452671681	-2.929785319	-0.953976558	-5.998873761	47	MODIFIER	MODERATE	NO	NO	NO	A	B	-2.5325186144801	-1.56870556527236	0	-1.3878907718305	-1.811950369428094
AL3G51550	AT2G18290	OG0017425	APC10	protein_coding	anaphase promoting complex 10	anaphase promoting complex 10	anaphase promoting complex 10 (APC10)%3B INVOLVED IN: regulation of D endoreduplication%2C phloem or xylem histogenesis%3B LOCATED IN: anaphase-promoting complex%3B EXPRESSED IN: 23 plant structures%3B EXPRESSED DURING: 13 growth stages%3B CONTAINS InterPro DOMAIN/s: Anaphase-promoting complex%2C subunit 10 (InterPro:IPR004939)%2C Anaphase-promoting complex%2C subunit 10%2C subgroup (InterPro:IPR…	Encodes APC10 (anaphase promoting complex 10). Overexpression of APC10 likely mimics auxin and ethylene sensitive phenotypes. Plays an essential role in cell proliferation during leaf development.	anaphase promoting complex 10 (APC10)%3B INVOLVED IN: regulation of D endoreduplication%2C phloem or xylem histogenesis%3B LOCATED IN: anaphase-promoting complex%3B EXPRESSED IN: 23 plant structures%3B EXPRESSED DURING: 13 growth stages%3B CONTAINS InterPro DOMAIN/s: Anaphase-promoting complex%2C subunit 10 (InterPro:IPR004939)%2C Anaphase-promoting complex%2C subunit 10%2C subgroup (InterPro:IPR…	scaffold_3	22703128	22705002	1875	-	scaffold_3	22705223	22705572	350	*	0.898809524	-0.041913737	229.6111956	0.911428571	5.554720033	0.012212842	6.034	-0.671428571	0.911428571	0	0.054945055	0.12	0.791428571	-2.452671681	-2.838436672	-0.715482419	-5.869448221	57	MODIFIER	NO	NO	NO	NO	A	B	-2.5325186144801	-1.48757752443128	0	-1.61094464587469	-1.811950369428094
AL3G51550	AT2G18290	OG0017425	APC10	protein_coding	anaphase promoting complex 10	anaphase promoting complex 10	anaphase promoting complex 10 (APC10)%3B INVOLVED IN: regulation of D endoreduplication%2C phloem or xylem histogenesis%3B LOCATED IN: anaphase-promoting complex%3B EXPRESSED IN: 23 plant structures%3B EXPRESSED DURING: 13 growth stages%3B CONTAINS InterPro DOMAIN/s: Anaphase-promoting complex%2C subunit 10 (InterPro:IPR004939)%2C Anaphase-promoting complex%2C subunit 10%2C subgroup (InterPro:IPR…	Encodes APC10 (anaphase promoting complex 10). Overexpression of APC10 likely mimics auxin and ethylene sensitive phenotypes. Plays an essential role in cell proliferation during leaf development.	anaphase promoting complex 10 (APC10)%3B INVOLVED IN: regulation of D endoreduplication%2C phloem or xylem histogenesis%3B LOCATED IN: anaphase-promoting complex%3B EXPRESSED IN: 23 plant structures%3B EXPRESSED DURING: 13 growth stages%3B CONTAINS InterPro DOMAIN/s: Anaphase-promoting complex%2C subunit 10 (InterPro:IPR004939)%2C Anaphase-promoting complex%2C subunit 10%2C subgroup (InterPro:IPR…	scaffold_3	22703128	22705002	1875	-	scaffold_3	22705223	22705572	350	*	0.898809524	-0.041913737	229.6111956	0.911428571	5.554720033	0.012212842	6.034	-0.671428571	0.911428571	0	0.054945055	0.12	0.791428571	-2.452671681	-2.838436672	-0.715482419	-5.869448221	56	MODIFIER	NO	NO	NO	NO	A	B	-2.5325186144801	-1.48757752443128	0	-1.61094464587469	-1.811950369428094
AL3G51550	AT2G18290	OG0017425	APC10	protein_coding	anaphase promoting complex 10	anaphase promoting complex 10	anaphase promoting complex 10 (APC10)%3B INVOLVED IN: regulation of D endoreduplication%2C phloem or xylem histogenesis%3B LOCATED IN: anaphase-promoting complex%3B EXPRESSED IN: 23 plant structures%3B EXPRESSED DURING: 13 growth stages%3B CONTAINS InterPro DOMAIN/s: Anaphase-promoting complex%2C subunit 10 (InterPro:IPR004939)%2C Anaphase-promoting complex%2C subunit 10%2C subgroup (InterPro:IPR…	Encodes APC10 (anaphase promoting complex 10). Overexpression of APC10 likely mimics auxin and ethylene sensitive phenotypes. Plays an essential role in cell proliferation during leaf development.	anaphase promoting complex 10 (APC10)%3B INVOLVED IN: regulation of D endoreduplication%2C phloem or xylem histogenesis%3B LOCATED IN: anaphase-promoting complex%3B EXPRESSED IN: 23 plant structures%3B EXPRESSED DURING: 13 growth stages%3B CONTAINS InterPro DOMAIN/s: Anaphase-promoting complex%2C subunit 10 (InterPro:IPR004939)%2C Anaphase-promoting complex%2C subunit 10%2C subgroup (InterPro:IPR…	scaffold_3	22703128	22705002	1875	-	scaffold_3	22703656	22704620	965	*	0.852761286	-0.050524195	192.2488002	0.868571429	5.203435108	0.012212842	12.6313	-0.148571429	0.868571429	0	0.061538462	0.36	0.508571429	-2.452671681	-2.766319319	-2.146447256	-3.57861617	84	MODIFIER	MODERATE	NO	NO	NO	A	B	-2.5325186144801	-1.48757752443128	0	-1.61094464587469	-1.811950369428094
AL3G51550	AT2G18290	OG0017425	APC10	protein_coding	anaphase promoting complex 10	anaphase promoting complex 10	anaphase promoting complex 10 (APC10)%3B INVOLVED IN: regulation of D endoreduplication%2C phloem or xylem histogenesis%3B LOCATED IN: anaphase-promoting complex%3B EXPRESSED IN: 23 plant structures%3B EXPRESSED DURING: 13 growth stages%3B CONTAINS InterPro DOMAIN/s: Anaphase-promoting complex%2C subunit 10 (InterPro:IPR004939)%2C Anaphase-promoting complex%2C subunit 10%2C subgroup (InterPro:IPR…	Encodes APC10 (anaphase promoting complex 10). Overexpression of APC10 likely mimics auxin and ethylene sensitive phenotypes. Plays an essential role in cell proliferation during leaf development.	anaphase promoting complex 10 (APC10)%3B INVOLVED IN: regulation of D endoreduplication%2C phloem or xylem histogenesis%3B LOCATED IN: anaphase-promoting complex%3B EXPRESSED IN: 23 plant structures%3B EXPRESSED DURING: 13 growth stages%3B CONTAINS InterPro DOMAIN/s: Anaphase-promoting complex%2C subunit 10 (InterPro:IPR004939)%2C Anaphase-promoting complex%2C subunit 10%2C subgroup (InterPro:IPR…	scaffold_3	22703128	22705002	1875	-	scaffold_3	22703656	22704620	965	*	0.852761286	-0.050524195	192.2488002	0.868571429	5.203435108	0.012212842	12.6313	-0.148571429	0.868571429	0	0.061538462	0.36	0.508571429	-2.452671681	-2.766319319	-2.146447256	-3.57861617	86	MODIFIER	MODERATE	NO	NO	NO	A	B	-2.5325186144801	-1.48757752443128	0	-1.61094464587469	-1.811950369428094
AL3G51550	AT2G18290	OG0017425	APC10	protein_coding	anaphase promoting complex 10	anaphase promoting complex 10	anaphase promoting complex 10 (APC10)%3B INVOLVED IN: regulation of D endoreduplication%2C phloem or xylem histogenesis%3B LOCATED IN: anaphase-promoting complex%3B EXPRESSED IN: 23 plant structures%3B EXPRESSED DURING: 13 growth stages%3B CONTAINS InterPro DOMAIN/s: Anaphase-promoting complex%2C subunit 10 (InterPro:IPR004939)%2C Anaphase-promoting complex%2C subunit 10%2C subgroup (InterPro:IPR…	Encodes APC10 (anaphase promoting complex 10). Overexpression of APC10 likely mimics auxin and ethylene sensitive phenotypes. Plays an essential role in cell proliferation during leaf development.	anaphase promoting complex 10 (APC10)%3B INVOLVED IN: regulation of D endoreduplication%2C phloem or xylem histogenesis%3B LOCATED IN: anaphase-promoting complex%3B EXPRESSED IN: 23 plant structures%3B EXPRESSED DURING: 13 growth stages%3B CONTAINS InterPro DOMAIN/s: Anaphase-promoting complex%2C subunit 10 (InterPro:IPR004939)%2C Anaphase-promoting complex%2C subunit 10%2C subgroup (InterPro:IPR…	scaffold_3	22703128	22705002	1875	-	scaffold_3	22705223	22705572	350	*	0.898809524	-0.041913737	229.6111956	0.911428571	5.554720033	0.012212842	6.034	-0.671428571	0.911428571	0	0.054945055	0.12	0.791428571	-2.452671681	-2.838436672	-0.715482419	-5.869448221	55	MODIFIER	NO	NO	NO	NO	A	B	-2.5325186144801	-1.48757752443128	0	-1.61094464587469	-1.811950369428094
AL3G51550	AT2G18290	OG0017425	APC10	protein_coding	anaphase promoting complex 10	anaphase promoting complex 10	anaphase promoting complex 10 (APC10)%3B INVOLVED IN: regulation of D endoreduplication%2C phloem or xylem histogenesis%3B LOCATED IN: anaphase-promoting complex%3B EXPRESSED IN: 23 plant structures%3B EXPRESSED DURING: 13 growth stages%3B CONTAINS InterPro DOMAIN/s: Anaphase-promoting complex%2C subunit 10 (InterPro:IPR004939)%2C Anaphase-promoting complex%2C subunit 10%2C subgroup (InterPro:IPR…	Encodes APC10 (anaphase promoting complex 10). Overexpression of APC10 likely mimics auxin and ethylene sensitive phenotypes. Plays an essential role in cell proliferation during leaf development.	anaphase promoting complex 10 (APC10)%3B INVOLVED IN: regulation of D endoreduplication%2C phloem or xylem histogenesis%3B LOCATED IN: anaphase-promoting complex%3B EXPRESSED IN: 23 plant structures%3B EXPRESSED DURING: 13 growth stages%3B CONTAINS InterPro DOMAIN/s: Anaphase-promoting complex%2C subunit 10 (InterPro:IPR004939)%2C Anaphase-promoting complex%2C subunit 10%2C subgroup (InterPro:IPR…	scaffold_3	22703128	22705002	1875	-	scaffold_3	22703656	22704620	965	*	0.852761286	-0.050524195	192.2488002	0.868571429	5.203435108	0.012212842	12.6313	-0.148571429	0.868571429	0	0.061538462	0.36	0.508571429	-2.452671681	-2.766319319	-2.146447256	-3.57861617	71	MODIFIER	MODERATE	NO	NO	NO	A	B	-2.5325186144801	-1.48757752443128	0	-1.61094464587469	-1.811950369428094
AL3G51550	AT2G18290	OG0017425	APC10	protein_coding	anaphase promoting complex 10	anaphase promoting complex 10	anaphase promoting complex 10 (APC10)%3B INVOLVED IN: regulation of D endoreduplication%2C phloem or xylem histogenesis%3B LOCATED IN: anaphase-promoting complex%3B EXPRESSED IN: 23 plant structures%3B EXPRESSED DURING: 13 growth stages%3B CONTAINS InterPro DOMAIN/s: Anaphase-promoting complex%2C subunit 10 (InterPro:IPR004939)%2C Anaphase-promoting complex%2C subunit 10%2C subgroup (InterPro:IPR…	Encodes APC10 (anaphase promoting complex 10). Overexpression of APC10 likely mimics auxin and ethylene sensitive phenotypes. Plays an essential role in cell proliferation during leaf development.	anaphase promoting complex 10 (APC10)%3B INVOLVED IN: regulation of D endoreduplication%2C phloem or xylem histogenesis%3B LOCATED IN: anaphase-promoting complex%3B EXPRESSED IN: 23 plant structures%3B EXPRESSED DURING: 13 growth stages%3B CONTAINS InterPro DOMAIN/s: Anaphase-promoting complex%2C subunit 10 (InterPro:IPR004939)%2C Anaphase-promoting complex%2C subunit 10%2C subgroup (InterPro:IPR…	scaffold_3	22703128	22705002	1875	-	scaffold_3	22703656	22704620	965	*	0.852761286	-0.050524195	192.2488002	0.868571429	5.203435108	0.012212842	12.6313	-0.148571429	0.868571429	0	0.061538462	0.36	0.508571429	-2.452671681	-2.766319319	-2.146447256	-3.57861617	85	MODIFIER	MODERATE	NO	NO	NO	A	B	-2.5325186144801	-1.48757752443128	0	-1.61094464587469	-1.811950369428094
AL3G51550	AT2G18290	OG0017425	APC10	protein_coding	anaphase promoting complex 10	anaphase promoting complex 10	anaphase promoting complex 10 (APC10)%3B INVOLVED IN: regulation of D endoreduplication%2C phloem or xylem histogenesis%3B LOCATED IN: anaphase-promoting complex%3B EXPRESSED IN: 23 plant structures%3B EXPRESSED DURING: 13 growth stages%3B CONTAINS InterPro DOMAIN/s: Anaphase-promoting complex%2C subunit 10 (InterPro:IPR004939)%2C Anaphase-promoting complex%2C subunit 10%2C subgroup (InterPro:IPR…	Encodes APC10 (anaphase promoting complex 10). Overexpression of APC10 likely mimics auxin and ethylene sensitive phenotypes. Plays an essential role in cell proliferation during leaf development.	anaphase promoting complex 10 (APC10)%3B INVOLVED IN: regulation of D endoreduplication%2C phloem or xylem histogenesis%3B LOCATED IN: anaphase-promoting complex%3B EXPRESSED IN: 23 plant structures%3B EXPRESSED DURING: 13 growth stages%3B CONTAINS InterPro DOMAIN/s: Anaphase-promoting complex%2C subunit 10 (InterPro:IPR004939)%2C Anaphase-promoting complex%2C subunit 10%2C subgroup (InterPro:IPR…	scaffold_3	22703128	22705002	1875	-	scaffold_3	22704698	22705216	519	*	0.807738943	-0.057412562	186.3578166	0.834285714	4.842949898	0.012212842	16.122	-0.434285714	0.834285714	0	0.107252747	0.2	0.634285714	-2.452671681	-2.266305673	-1.192470698	-4.238686422	123	MODIFIER	NO	NO	NO	NO	A	B	-2.5325186144801	-1.48757752443128	0	-1.61094464587469	-1.811950369428094
AL3G53050	AT2G18876	OG0016386	.	protein_coding	Afadin/alpha-actinin-binding protein	.	Afadin/alpha-actinin-binding protein%3B CONTAINS InterPro DOMAIN/s: Afadin/alpha-actinin-binding (InterPro:IPR021622)%3B BEST Arabidopsis thaliana protein match is: Afadin/alpha-actinin-binding protein (TAIR:AT5G57410.3)%3B Has 6400 Blast hits to 5312 proteins in 498 species: Archae - 42%3B Bacteria - 460%3B Metazoa - 3301%3B Fungi - 542%3B Plants - 222%3B Viruses - 9%3B Other Eukaryotes - 1824 (…	Encodes a microtubule-associated protein.	Afadin/alpha-actinin-binding protein%3B CONTAINS InterPro DOMAIN/s: Afadin/alpha-actinin-binding (InterPro:IPR021622)%3B BEST Arabidopsis thaliana protein match is: Afadin/alpha-actinin-binding protein (TAIR:AT5G57410.3)%3B Has 6400 Blast hits to 5312 proteins in 498 species: Archae - 42%3B Bacteria - 460%3B Metazoa - 3301%3B Fungi - 542%3B Plants - 222%3B Viruses - 9%3B Other Eukaryotes - 1824 (…	scaffold_3	23637718	23640613	2896	-	scaffold_3	23639037	23639526	490	*	0.246841915	-0.065488494	298.3120809	0.5537142859999999	1.110288848	0.281410248	2.6166	-0.357142857	0.460571429	0.202105263	0.527912088	0.2	0.557142857	-0.694064741	2.334781434	-0.047698828	-0.530644712	35	MODIFIER		NO	NO	NO	C	B	-0.760165021296995	1.45331395605781	-2.48216942558102	-0.429585238899922	-0.03959677624498892
AL4G16830	AT2G25420	OG0019002	.	protein_coding	transducin family protein / WD-40 repeat family protein	.	transducin family protein / WD-40 repeat family protein%3B CONTAINS InterPro DOMAIN/s: WD40 repeat 2 (InterPro:IPR019782)%2C WD40 repeat (InterPro:IPR001680)%2C CTLH%2C C-terminal LisH motif (InterPro:IPR006595)%2C WD40 repeat-like-containing domain (InterPro:IPR011046)%2C WD40-repeat-containing domain (InterPro:IPR017986)%2C WD40/YVTN repeat-like-containing domain (InterPro:IPR015943)%2C LisH di…	.	transducin family protein / WD-40 repeat family protein%3B CONTAINS InterPro DOMAIN/s: WD40 repeat 2 (InterPro:IPR019782)%2C WD40 repeat (InterPro:IPR001680)%2C CTLH%2C C-terminal LisH motif (InterPro:IPR006595)%2C WD40 repeat-like-containing domain (InterPro:IPR011046)%2C WD40-repeat-containing domain (InterPro:IPR017986)%2C WD40/YVTN repeat-like-containing domain (InterPro:IPR015943)%2C LisH di…	scaffold_4	4282910	4287414	4505	+	scaffold_4	4285236	4285739	504	*	0.841299836	-0.017799016	225.6352241	0.875428571	5.279776298	0.012212842	11.7818	0.292571429	0.875428571	0.032	0.060659341	0.584	0.291428571	-2.174225582	-2.775934966	-3.300758891	-1.86372777	83	MODIFIER	MODERATE	NO	NO	NO	A	A	-1.81374127679645	-2.68928662938975	-4.57074676833332	-0.363495202146086	-1.093173031744444
AL4G16830	AT2G25420	OG0019002	.	protein_coding	transducin family protein / WD-40 repeat family protein	.	transducin family protein / WD-40 repeat family protein%3B CONTAINS InterPro DOMAIN/s: WD40 repeat 2 (InterPro:IPR019782)%2C WD40 repeat (InterPro:IPR001680)%2C CTLH%2C C-terminal LisH motif (InterPro:IPR006595)%2C WD40 repeat-like-containing domain (InterPro:IPR011046)%2C WD40-repeat-containing domain (InterPro:IPR017986)%2C WD40/YVTN repeat-like-containing domain (InterPro:IPR015943)%2C LisH di…	.	transducin family protein / WD-40 repeat family protein%3B CONTAINS InterPro DOMAIN/s: WD40 repeat 2 (InterPro:IPR019782)%2C WD40 repeat (InterPro:IPR001680)%2C CTLH%2C C-terminal LisH motif (InterPro:IPR006595)%2C WD40 repeat-like-containing domain (InterPro:IPR011046)%2C WD40-repeat-containing domain (InterPro:IPR017986)%2C WD40/YVTN repeat-like-containing domain (InterPro:IPR015943)%2C LisH di…	scaffold_4	4282910	4287414	4505	+	scaffold_4	4285236	4285739	504	*	0.841299836	-0.017799016	225.6352241	0.875428571	5.279776298	0.012212842	11.7818	0.292571429	0.875428571	0.032	0.060659341	0.584	0.291428571	-2.174225582	-2.775934966	-3.300758891	-1.86372777	84	MODIFIER	MODERATE	NO	NO	NO	A	A	-1.81374127679645	-2.68928662938975	-4.57074676833332	-0.363495202146086	-1.093173031744444
AL4G16830	AT2G25420	OG0019002	.	protein_coding	transducin family protein / WD-40 repeat family protein	.	transducin family protein / WD-40 repeat family protein%3B CONTAINS InterPro DOMAIN/s: WD40 repeat 2 (InterPro:IPR019782)%2C WD40 repeat (InterPro:IPR001680)%2C CTLH%2C C-terminal LisH motif (InterPro:IPR006595)%2C WD40 repeat-like-containing domain (InterPro:IPR011046)%2C WD40-repeat-containing domain (InterPro:IPR017986)%2C WD40/YVTN repeat-like-containing domain (InterPro:IPR015943)%2C LisH di…	.	transducin family protein / WD-40 repeat family protein%3B CONTAINS InterPro DOMAIN/s: WD40 repeat 2 (InterPro:IPR019782)%2C WD40 repeat (InterPro:IPR001680)%2C CTLH%2C C-terminal LisH motif (InterPro:IPR006595)%2C WD40 repeat-like-containing domain (InterPro:IPR011046)%2C WD40-repeat-containing domain (InterPro:IPR017986)%2C WD40/YVTN repeat-like-containing domain (InterPro:IPR015943)%2C LisH di…	scaffold_4	4282910	4287414	4505	+	scaffold_4	4285236	4285739	504	*	0.841299836	-0.017799016	225.6352241	0.875428571	5.279776298	0.012212842	11.7818	0.292571429	0.875428571	0.032	0.060659341	0.584	0.291428571	-2.174225582	-2.775934966	-3.300758891	-1.86372777	77	MODIFIER	MODERATE	NO	NO	NO	A	A	-1.81374127679645	-2.68928662938975	-4.57074676833332	-0.363495202146086	-1.093173031744444
AL4G16830	AT2G25420	OG0019002	.	protein_coding	transducin family protein / WD-40 repeat family protein	.	transducin family protein / WD-40 repeat family protein%3B CONTAINS InterPro DOMAIN/s: WD40 repeat 2 (InterPro:IPR019782)%2C WD40 repeat (InterPro:IPR001680)%2C CTLH%2C C-terminal LisH motif (InterPro:IPR006595)%2C WD40 repeat-like-containing domain (InterPro:IPR011046)%2C WD40-repeat-containing domain (InterPro:IPR017986)%2C WD40/YVTN repeat-like-containing domain (InterPro:IPR015943)%2C LisH di…	.	transducin family protein / WD-40 repeat family protein%3B CONTAINS InterPro DOMAIN/s: WD40 repeat 2 (InterPro:IPR019782)%2C WD40 repeat (InterPro:IPR001680)%2C CTLH%2C C-terminal LisH motif (InterPro:IPR006595)%2C WD40 repeat-like-containing domain (InterPro:IPR011046)%2C WD40-repeat-containing domain (InterPro:IPR017986)%2C WD40/YVTN repeat-like-containing domain (InterPro:IPR015943)%2C LisH di…	scaffold_4	4282910	4287414	4505	+	scaffold_4	4285236	4285739	504	*	0.841299836	-0.017799016	225.6352241	0.875428571	5.279776298	0.012212842	11.7818	0.292571429	0.875428571	0.032	0.060659341	0.584	0.291428571	-2.174225582	-2.775934966	-3.300758891	-1.86372777	89	MODIFIER	MODERATE	NO	NO	NO	A	A	-1.81374127679645	-2.68928662938975	-4.57074676833332	-0.363495202146086	-1.093173031744444
AL4G26010	AT1G06390	OG0000325	GSK1	protein_coding	GSK3/SHAGGY-like protein kinase 1	GSK3/SHAGGY-like protein kinase 1	GSK3/SHAGGY-like protein kinase 1 (GSK1)%3B FUNCTIONS IN: kinase activity%2C glycogen synthase kinase 3 activity%3B INVOLVED IN: brassinosteroid mediated signaling pathway%2C protein amino acid phosphorylation%2C hyperosmotic salinity response%2C regulation of protein localization%3B LOCATED IN: cytosol%2C plasma membrane%3B EXPRESSED IN: 24 plant structures%3B EXPRESSED DURING: 13 growth stages%…	encodes a GSK3/shaggy-like protein kinase. Gene expression is induced by NaCl and ABA but not KCl%2C suggesting that this gene may be involved in response to osmotic stress. This protein can interact with the BZR1 protein involved in brassinosteroid-mediated signaling in a Y2H assay and promotes BZR1 phosphorylation in protoplasts.	GSK3/SHAGGY-like protein kinase 1 (GSK1)%3B FUNCTIONS IN: kinase activity%2C glycogen synthase kinase 3 activity%3B INVOLVED IN: brassinosteroid mediated signaling pathway%2C protein amino acid phosphorylation%2C hyperosmotic salinity response%2C regulation of protein localization%3B LOCATED IN: cytosol%2C plasma membrane%3B EXPRESSED IN: 24 plant structures%3B EXPRESSED DURING: 13 growth stages%…	scaffold_4	14556782	14560664	3883	-	scaffold_4	14557720	14558024	305	*	0.488599749	-0.020102895	284.1783928	0.677142857	2.432483831	0.091733162	31.7336	-0.651428571	0.651428571	0.116631579	0.353846154	0.06	0.711428571	-1.437808926	0.430883321	0.302887557	-3.035028904	120	MODIFIER		NO	NO	NO	A	B	-1.51298970655513	0.454424953202042	0.526905530238423	-3.87452840469351	-0.792421461503124
AL4G26010	AT1G06390	OG0000325	GSK1	protein_coding	GSK3/SHAGGY-like protein kinase 1	GSK3/SHAGGY-like protein kinase 1	GSK3/SHAGGY-like protein kinase 1 (GSK1)%3B FUNCTIONS IN: kinase activity%2C glycogen synthase kinase 3 activity%3B INVOLVED IN: brassinosteroid mediated signaling pathway%2C protein amino acid phosphorylation%2C hyperosmotic salinity response%2C regulation of protein localization%3B LOCATED IN: cytosol%2C plasma membrane%3B EXPRESSED IN: 24 plant structures%3B EXPRESSED DURING: 13 growth stages%…	encodes a GSK3/shaggy-like protein kinase. Gene expression is induced by NaCl and ABA but not KCl%2C suggesting that this gene may be involved in response to osmotic stress. This protein can interact with the BZR1 protein involved in brassinosteroid-mediated signaling in a Y2H assay and promotes BZR1 phosphorylation in protoplasts.	GSK3/SHAGGY-like protein kinase 1 (GSK1)%3B FUNCTIONS IN: kinase activity%2C glycogen synthase kinase 3 activity%3B INVOLVED IN: brassinosteroid mediated signaling pathway%2C protein amino acid phosphorylation%2C hyperosmotic salinity response%2C regulation of protein localization%3B LOCATED IN: cytosol%2C plasma membrane%3B EXPRESSED IN: 24 plant structures%3B EXPRESSED DURING: 13 growth stages%…	scaffold_4	14556782	14560664	3883	-	scaffold_4	14557720	14558024	305	*	0.488599749	-0.020102895	284.1783928	0.677142857	2.432483831	0.091733162	31.7336	-0.651428571	0.651428571	0.116631579	0.353846154	0.06	0.711428571	-1.437808926	0.430883321	0.302887557	-3.035028904	120	MODIFIER		NO	NO	NO	A	B	-1.51298970655513	0.454424953202042	0.526905530238423	-3.87452840469351	-0.792421461503124
AL4G26010	AT1G06390	OG0000325	GSK1	protein_coding	GSK3/SHAGGY-like protein kinase 1	GSK3/SHAGGY-like protein kinase 1	GSK3/SHAGGY-like protein kinase 1 (GSK1)%3B FUNCTIONS IN: kinase activity%2C glycogen synthase kinase 3 activity%3B INVOLVED IN: brassinosteroid mediated signaling pathway%2C protein amino acid phosphorylation%2C hyperosmotic salinity response%2C regulation of protein localization%3B LOCATED IN: cytosol%2C plasma membrane%3B EXPRESSED IN: 24 plant structures%3B EXPRESSED DURING: 13 growth stages%…	encodes a GSK3/shaggy-like protein kinase. Gene expression is induced by NaCl and ABA but not KCl%2C suggesting that this gene may be involved in response to osmotic stress. This protein can interact with the BZR1 protein involved in brassinosteroid-mediated signaling in a Y2H assay and promotes BZR1 phosphorylation in protoplasts.	GSK3/SHAGGY-like protein kinase 1 (GSK1)%3B FUNCTIONS IN: kinase activity%2C glycogen synthase kinase 3 activity%3B INVOLVED IN: brassinosteroid mediated signaling pathway%2C protein amino acid phosphorylation%2C hyperosmotic salinity response%2C regulation of protein localization%3B LOCATED IN: cytosol%2C plasma membrane%3B EXPRESSED IN: 24 plant structures%3B EXPRESSED DURING: 13 growth stages%…	scaffold_4	14556782	14560664	3883	-	scaffold_4	14557720	14558024	305	*	0.488599749	-0.020102895	284.1783928	0.677142857	2.432483831	0.091733162	31.7336	-0.651428571	0.651428571	0.116631579	0.353846154	0.06	0.711428571	-1.437808926	0.430883321	0.302887557	-3.035028904	120	MODIFIER		NO	NO	NO	B	B	-1.51298970655513	0.454424953202042	0.526905530238423	-3.87452840469351	-0.792421461503124
AL4G26010	AT2G30980	OG0000325	SKdZeta	protein_coding	SHAGGY-related protein kinase dZeta	SHAGGY-related protein kinase dZeta	SHAGGY-related protein kinase dZeta (SKdZeta)%3B FUNCTIONS IN: protein serine/threonine kinase activity%2C protein kinase activity%2C kinase activity%2C ATP binding%3B INVOLVED IN: brassinosteroid mediated signaling pathway%2C protein amino acid phosphorylation%2C regulation of protein localization%3B LOCATED IN: cellular_component unknown%3B EXPRESSED IN: 24 plant structures%3B EXPRESSED DURING:…	Encodes a GSK3-like protein kinase. This protein can interact with the BZR1 protein involved in brassinosteroid-mediated signaling in a Y2H assay and promotes BZR1 phosphorylation in protoplasts.	SHAGGY-related protein kinase dZeta (SKdZeta)%3B FUNCTIONS IN: protein serine/threonine kinase activity%2C protein kinase activity%2C kinase activity%2C ATP binding%3B INVOLVED IN: brassinosteroid mediated signaling pathway%2C protein amino acid phosphorylation%2C regulation of protein localization%3B LOCATED IN: cellular_component unknown%3B EXPRESSED IN: 24 plant structures%3B EXPRESSED DURING:…	scaffold_4	14556782	14560664	3883	-	scaffold_4	14557720	14558024	305	*	0.488599749	-0.020102895	284.1783928	0.677142857	2.432483831	0.091733162	31.7336	-0.651428571	0.651428571	0.116631579	0.353846154	0.06	0.711428571	-1.437808926	0.430883321	0.302887557	-3.035028904	120	MODIFIER		NO	NO	NO	A	B	-1.51298970655513	0.454424953202042	0.526905530238423	-3.87452840469351	-0.792421461503124
AL4G26010	AT2G30980	OG0000325	SKdZeta	protein_coding	SHAGGY-related protein kinase dZeta	SHAGGY-related protein kinase dZeta	SHAGGY-related protein kinase dZeta (SKdZeta)%3B FUNCTIONS IN: protein serine/threonine kinase activity%2C protein kinase activity%2C kinase activity%2C ATP binding%3B INVOLVED IN: brassinosteroid mediated signaling pathway%2C protein amino acid phosphorylation%2C regulation of protein localization%3B LOCATED IN: cellular_component unknown%3B EXPRESSED IN: 24 plant structures%3B EXPRESSED DURING:…	Encodes a GSK3-like protein kinase. This protein can interact with the BZR1 protein involved in brassinosteroid-mediated signaling in a Y2H assay and promotes BZR1 phosphorylation in protoplasts.	SHAGGY-related protein kinase dZeta (SKdZeta)%3B FUNCTIONS IN: protein serine/threonine kinase activity%2C protein kinase activity%2C kinase activity%2C ATP binding%3B INVOLVED IN: brassinosteroid mediated signaling pathway%2C protein amino acid phosphorylation%2C regulation of protein localization%3B LOCATED IN: cellular_component unknown%3B EXPRESSED IN: 24 plant structures%3B EXPRESSED DURING:…	scaffold_4	14556782	14560664	3883	-	scaffold_4	14557720	14558024	305	*	0.488599749	-0.020102895	284.1783928	0.677142857	2.432483831	0.091733162	31.7336	-0.651428571	0.651428571	0.116631579	0.353846154	0.06	0.711428571	-1.437808926	0.430883321	0.302887557	-3.035028904	120	MODIFIER		NO	NO	NO	A	B	-1.51298970655513	0.454424953202042	0.526905530238423	-3.87452840469351	-0.792421461503124
AL4G26010	AT2G30980	OG0000325	SKdZeta	protein_coding	SHAGGY-related protein kinase dZeta	SHAGGY-related protein kinase dZeta	SHAGGY-related protein kinase dZeta (SKdZeta)%3B FUNCTIONS IN: protein serine/threonine kinase activity%2C protein kinase activity%2C kinase activity%2C ATP binding%3B INVOLVED IN: brassinosteroid mediated signaling pathway%2C protein amino acid phosphorylation%2C regulation of protein localization%3B LOCATED IN: cellular_component unknown%3B EXPRESSED IN: 24 plant structures%3B EXPRESSED DURING:…	Encodes a GSK3-like protein kinase. This protein can interact with the BZR1 protein involved in brassinosteroid-mediated signaling in a Y2H assay and promotes BZR1 phosphorylation in protoplasts.	SHAGGY-related protein kinase dZeta (SKdZeta)%3B FUNCTIONS IN: protein serine/threonine kinase activity%2C protein kinase activity%2C kinase activity%2C ATP binding%3B INVOLVED IN: brassinosteroid mediated signaling pathway%2C protein amino acid phosphorylation%2C regulation of protein localization%3B LOCATED IN: cellular_component unknown%3B EXPRESSED IN: 24 plant structures%3B EXPRESSED DURING:…	scaffold_4	14556782	14560664	3883	-	scaffold_4	14557720	14558024	305	*	0.488599749	-0.020102895	284.1783928	0.677142857	2.432483831	0.091733162	31.7336	-0.651428571	0.651428571	0.116631579	0.353846154	0.06	0.711428571	-1.437808926	0.430883321	0.302887557	-3.035028904	120	MODIFIER		NO	NO	NO	B	B	-1.51298970655513	0.454424953202042	0.526905530238423	-3.87452840469351	-0.792421461503124
AL4G26010	AT4G18710	OG0000325	BIN2	protein_coding	Protein kinase superfamily protein	BRASSINOSTEROID-INSENSITIVE 2	BRASSINOSTEROID-INSENSITIVE 2 (BIN2)%3B FUNCTIONS IN: protein kinase activity%2C kinase activity%2C glycogen synthase kinase 3 activity%3B INVOLVED IN: in 7 processes%3B LOCATED IN: plasma membrane%3B EXPRESSED IN: 29 plant structures%3B EXPRESSED DURING: 13 growth stages%3B CONTAINS InterPro DOMAIN/s: Protein kinase%2C ATP binding site (InterPro:IPR017441)%2C Protein kinase%2C catalytic domain (…	Encodes BIN2%2C a member of the ATSK (shaggy-like kinase) family. BIN2 functions in the cross-talk between auxin and brassinosteroid signaling pathways. BIN2 regulates root epidermal cell fate specification by phosphorylating EGL3 and TTG1. BIN2-mediated phosphorylation appears to promote BZR1 export from the nucleus.	BRASSINOSTEROID-INSENSITIVE 2 (BIN2)%3B FUNCTIONS IN: protein kinase activity%2C kinase activity%2C glycogen synthase kinase 3 activity%3B INVOLVED IN: in 7 processes%3B LOCATED IN: plasma membrane%3B EXPRESSED IN: 29 plant structures%3B EXPRESSED DURING: 13 growth stages%3B CONTAINS InterPro DOMAIN/s: Protein kinase%2C ATP binding site (InterPro:IPR017441)%2C Protein kinase%2C catalytic domain (…	scaffold_4	14556782	14560664	3883	-	scaffold_4	14557720	14558024	305	*	0.488599749	-0.020102895	284.1783928	0.677142857	2.432483831	0.091733162	31.7336	-0.651428571	0.651428571	0.116631579	0.353846154	0.06	0.711428571	-1.437808926	0.430883321	0.302887557	-3.035028904	120	MODIFIER		NO	NO	NO	A	B	-1.51298970655513	0.454424953202042	0.526905530238423	-3.87452840469351	-0.792421461503124
AL4G26010	AT4G18710	OG0000325	BIN2	protein_coding	Protein kinase superfamily protein	BRASSINOSTEROID-INSENSITIVE 2	BRASSINOSTEROID-INSENSITIVE 2 (BIN2)%3B FUNCTIONS IN: protein kinase activity%2C kinase activity%2C glycogen synthase kinase 3 activity%3B INVOLVED IN: in 7 processes%3B LOCATED IN: plasma membrane%3B EXPRESSED IN: 29 plant structures%3B EXPRESSED DURING: 13 growth stages%3B CONTAINS InterPro DOMAIN/s: Protein kinase%2C ATP binding site (InterPro:IPR017441)%2C Protein kinase%2C catalytic domain (…	Encodes BIN2%2C a member of the ATSK (shaggy-like kinase) family. BIN2 functions in the cross-talk between auxin and brassinosteroid signaling pathways. BIN2 regulates root epidermal cell fate specification by phosphorylating EGL3 and TTG1. BIN2-mediated phosphorylation appears to promote BZR1 export from the nucleus.	BRASSINOSTEROID-INSENSITIVE 2 (BIN2)%3B FUNCTIONS IN: protein kinase activity%2C kinase activity%2C glycogen synthase kinase 3 activity%3B INVOLVED IN: in 7 processes%3B LOCATED IN: plasma membrane%3B EXPRESSED IN: 29 plant structures%3B EXPRESSED DURING: 13 growth stages%3B CONTAINS InterPro DOMAIN/s: Protein kinase%2C ATP binding site (InterPro:IPR017441)%2C Protein kinase%2C catalytic domain (…	scaffold_4	14556782	14560664	3883	-	scaffold_4	14557720	14558024	305	*	0.488599749	-0.020102895	284.1783928	0.677142857	2.432483831	0.091733162	31.7336	-0.651428571	0.651428571	0.116631579	0.353846154	0.06	0.711428571	-1.437808926	0.430883321	0.302887557	-3.035028904	120	MODIFIER		NO	NO	NO	A	B	-1.51298970655513	0.454424953202042	0.526905530238423	-3.87452840469351	-0.792421461503124
AL4G26010	AT4G18710	OG0000325	BIN2	protein_coding	Protein kinase superfamily protein	BRASSINOSTEROID-INSENSITIVE 2	BRASSINOSTEROID-INSENSITIVE 2 (BIN2)%3B FUNCTIONS IN: protein kinase activity%2C kinase activity%2C glycogen synthase kinase 3 activity%3B INVOLVED IN: in 7 processes%3B LOCATED IN: plasma membrane%3B EXPRESSED IN: 29 plant structures%3B EXPRESSED DURING: 13 growth stages%3B CONTAINS InterPro DOMAIN/s: Protein kinase%2C ATP binding site (InterPro:IPR017441)%2C Protein kinase%2C catalytic domain (…	Encodes BIN2%2C a member of the ATSK (shaggy-like kinase) family. BIN2 functions in the cross-talk between auxin and brassinosteroid signaling pathways. BIN2 regulates root epidermal cell fate specification by phosphorylating EGL3 and TTG1. BIN2-mediated phosphorylation appears to promote BZR1 export from the nucleus.	BRASSINOSTEROID-INSENSITIVE 2 (BIN2)%3B FUNCTIONS IN: protein kinase activity%2C kinase activity%2C glycogen synthase kinase 3 activity%3B INVOLVED IN: in 7 processes%3B LOCATED IN: plasma membrane%3B EXPRESSED IN: 29 plant structures%3B EXPRESSED DURING: 13 growth stages%3B CONTAINS InterPro DOMAIN/s: Protein kinase%2C ATP binding site (InterPro:IPR017441)%2C Protein kinase%2C catalytic domain (…	scaffold_4	14556782	14560664	3883	-	scaffold_4	14557720	14558024	305	*	0.488599749	-0.020102895	284.1783928	0.677142857	2.432483831	0.091733162	31.7336	-0.651428571	0.651428571	0.116631579	0.353846154	0.06	0.711428571	-1.437808926	0.430883321	0.302887557	-3.035028904	120	MODIFIER		NO	NO	NO	B	B	-1.51298970655513	0.454424953202042	0.526905530238423	-3.87452840469351	-0.792421461503124
AL4G35060	AT2G38060	OG0014276	PHT4%3B2	protein_coding	phosphate transporter 4%3B2	phosphate transporter 4%3B2	phosphate transporter 4%3B2 (PHT4%3B2)%3B FUNCTIONS IN: organic anion transmembrane transporter activity%2C carbohydrate transmembrane transporter activity%2C inorganic phosphate transmembrane transporter activity%2C sugar:hydrogen symporter activity%3B INVOLVED IN: transmembrane transport%3B LOCATED IN: plastid%2C membrane%3B EXPRESSED IN: 13 plant structures%3B EXPRESSED DURING: 6 growth stages…	Encodes an inorganic phosphate transporter (PHT4%3B2).	phosphate transporter 4%3B2 (PHT4%3B2)%3B FUNCTIONS IN: organic anion transmembrane transporter activity%2C carbohydrate transmembrane transporter activity%2C inorganic phosphate transmembrane transporter activity%2C sugar:hydrogen symporter activity%3B INVOLVED IN: transmembrane transport%3B LOCATED IN: plastid%2C membrane%3B EXPRESSED IN: 13 plant structures%3B EXPRESSED DURING: 6 growth stages…	scaffold_4	18402351	18405613	3263	-	scaffold_4	18405105	18405513	409	*	0.829700629	-0.032383987	227.1168866	0.848	5.166665488	0.012212842	2.0185	0.402285714	0.848	0.022736842	0.042197802	0.648	0.245714286	-2.254828401	-2.977863554	-3.734818225	-1.637233076	126	MODIFIER	MODERATE	NO	NO	NO	B	B	0.493912281030005	-2.16195436392274	-0.550182481373452	-0.0495675275653746	1.214480526082011
AL4G35060	AT2G38060	OG0014276	PHT4%3B2	protein_coding	phosphate transporter 4%3B2	phosphate transporter 4%3B2	phosphate transporter 4%3B2 (PHT4%3B2)%3B FUNCTIONS IN: organic anion transmembrane transporter activity%2C carbohydrate transmembrane transporter activity%2C inorganic phosphate transmembrane transporter activity%2C sugar:hydrogen symporter activity%3B INVOLVED IN: transmembrane transport%3B LOCATED IN: plastid%2C membrane%3B EXPRESSED IN: 13 plant structures%3B EXPRESSED DURING: 6 growth stages…	Encodes an inorganic phosphate transporter (PHT4%3B2).	phosphate transporter 4%3B2 (PHT4%3B2)%3B FUNCTIONS IN: organic anion transmembrane transporter activity%2C carbohydrate transmembrane transporter activity%2C inorganic phosphate transmembrane transporter activity%2C sugar:hydrogen symporter activity%3B INVOLVED IN: transmembrane transport%3B LOCATED IN: plastid%2C membrane%3B EXPRESSED IN: 13 plant structures%3B EXPRESSED DURING: 6 growth stages…	scaffold_4	18402351	18405613	3263	-	scaffold_4	18405105	18405513	409	*	0.829700629	-0.032383987	227.1168866	0.848	5.166665488	0.012212842	2.0185	0.402285714	0.848	0.022736842	0.042197802	0.648	0.245714286	-2.254828401	-2.977863554	-3.734818225	-1.637233076	91	MODIFIER	MODERATE	NO	NO	NO	B	B	0.493912281030005	-2.16195436392274	-0.550182481373452	-0.0495675275653746	1.214480526082011
AL4G35060	AT2G38060	OG0014276	PHT4%3B2	protein_coding	phosphate transporter 4%3B2	phosphate transporter 4%3B2	phosphate transporter 4%3B2 (PHT4%3B2)%3B FUNCTIONS IN: organic anion transmembrane transporter activity%2C carbohydrate transmembrane transporter activity%2C inorganic phosphate transmembrane transporter activity%2C sugar:hydrogen symporter activity%3B INVOLVED IN: transmembrane transport%3B LOCATED IN: plastid%2C membrane%3B EXPRESSED IN: 13 plant structures%3B EXPRESSED DURING: 6 growth stages…	Encodes an inorganic phosphate transporter (PHT4%3B2).	phosphate transporter 4%3B2 (PHT4%3B2)%3B FUNCTIONS IN: organic anion transmembrane transporter activity%2C carbohydrate transmembrane transporter activity%2C inorganic phosphate transmembrane transporter activity%2C sugar:hydrogen symporter activity%3B INVOLVED IN: transmembrane transport%3B LOCATED IN: plastid%2C membrane%3B EXPRESSED IN: 13 plant structures%3B EXPRESSED DURING: 6 growth stages…	scaffold_4	18402351	18405613	3263	-	scaffold_4	18405105	18405513	409	*	0.829700629	-0.032383987	227.1168866	0.848	5.166665488	0.012212842	2.0185	0.402285714	0.848	0.022736842	0.042197802	0.648	0.245714286	-2.254828401	-2.977863554	-3.734818225	-1.637233076	130	MODIFIER	MODERATE	NO	NO	NO	B	B	0.493912281030005	-2.16195436392274	-0.550182481373452	-0.0495675275653746	1.214480526082011
AL4G35060	AT2G38060	OG0014276	PHT4%3B2	protein_coding	phosphate transporter 4%3B2	phosphate transporter 4%3B2	phosphate transporter 4%3B2 (PHT4%3B2)%3B FUNCTIONS IN: organic anion transmembrane transporter activity%2C carbohydrate transmembrane transporter activity%2C inorganic phosphate transmembrane transporter activity%2C sugar:hydrogen symporter activity%3B INVOLVED IN: transmembrane transport%3B LOCATED IN: plastid%2C membrane%3B EXPRESSED IN: 13 plant structures%3B EXPRESSED DURING: 6 growth stages…	Encodes an inorganic phosphate transporter (PHT4%3B2).	phosphate transporter 4%3B2 (PHT4%3B2)%3B FUNCTIONS IN: organic anion transmembrane transporter activity%2C carbohydrate transmembrane transporter activity%2C inorganic phosphate transmembrane transporter activity%2C sugar:hydrogen symporter activity%3B INVOLVED IN: transmembrane transport%3B LOCATED IN: plastid%2C membrane%3B EXPRESSED IN: 13 plant structures%3B EXPRESSED DURING: 6 growth stages…	scaffold_4	18402351	18405613	3263	-	scaffold_4	18405105	18405513	409	*	0.829700629	-0.032383987	227.1168866	0.848	5.166665488	0.012212842	2.0185	0.402285714	0.848	0.022736842	0.042197802	0.648	0.245714286	-2.254828401	-2.977863554	-3.734818225	-1.637233076	104	MODIFIER	MODERATE	NO	NO	NO	B	B	0.493912281030005	-2.16195436392274	-0.550182481373452	-0.0495675275653746	1.214480526082011
AL5G13380	AT2G03590	OG0021979	UPS1	protein_coding	ureide permease 1	ureide permease 1	ureide permease 1 (UPS1)%3B FUNCTIONS IN: allantoin uptake transmembrane transporter activity%3B INVOLVED IN: allantoin transport%3B LOCATED IN: endomembrane system%3B BEST Arabidopsis thaliana protein match is: ureide permease 2 (TAIR:AT2G03530.2)%3B Has 283 Blast hits to 283 proteins in 80 species: Archae - 0%3B Bacteria - 139%3B Metazoa - 0%3B Fungi - 0%3B Plants - 116%3B Viruses - 0%3B Other …	Encodes a member of a class of allantoin transporters.	ureide permease 1 (UPS1)%3B FUNCTIONS IN: allantoin uptake transmembrane transporter activity%3B INVOLVED IN: allantoin transport%3B LOCATED IN: endomembrane system%3B BEST Arabidopsis thaliana protein match is: ureide permease 2 (TAIR:AT2G03530.2)%3B Has 283 Blast hits to 283 proteins in 80 species: Archae - 0%3B Bacteria - 139%3B Metazoa - 0%3B Fungi - 0%3B Plants - 116%3B Viruses - 0%3B Other …	scaffold_5	1924842	1927166	2325	+	scaffold_5	1924930	1925200	271	*	0.517146499	-6.39655E-4	309.4520816	0.689428571	2.547109763	0.091733162	13.5324	-0.579142857	0.668285714	0.092	0.351648352	0.118	0.697142857	-1.652139147	0.406844203	-0.182448017	-2.937959749	14	MODIFIER		NO	NO	NO	C	B	-1.66998580925972	0.48991847107001	-0.30471645122222	-3.00709667229943	-0.9494175642077138
AL5G14730	AT3G26050	OG0014887	.	protein_coding	TPX2 (targeting protein for Xklp2) protein family	.	TPX2 (targeting protein for Xklp2) protein family%3B FUNCTIONS IN: molecular_function unknown%3B INVOLVED IN: biological_process unknown%3B LOCATED IN: chloroplast%3B EXPRESSED IN: 11 plant structures%3B EXPRESSED DURING: 6 growth stages%3B CONTAINS InterPro DOMAIN/s: Xklp2 targeting protein (InterPro:IPR009675)%3B BEST Arabidopsis thaliana protein match is: unknown protein (TAIR:AT3G27350.1)%3B …	.	TPX2 (targeting protein for Xklp2) protein family%3B FUNCTIONS IN: molecular_function unknown%3B INVOLVED IN: biological_process unknown%3B LOCATED IN: chloroplast%3B EXPRESSED IN: 11 plant structures%3B EXPRESSED DURING: 6 growth stages%3B CONTAINS InterPro DOMAIN/s: Xklp2 targeting protein (InterPro:IPR009675)%3B BEST Arabidopsis thaliana protein match is: unknown protein (TAIR:AT3G27350.1)%3B …	scaffold_5	2634570	2637311	2742	+	scaffold_5	2635464	2636173	710	*	0.874025106	-0.018160552	204.681857	0.888	5.50073114	0.012212842	0.9682	0.242285714	0.888	0.029052632	0.011428571	0.568	0.325714286	-2.199871934	-3.314411201	-3.222055825	-2.497912914	65	MODIFIER	MODERATE	NO	NO	NO	B	B	-1.53001338034238	-3.62732960161472	-2.01028214347992	0	-0.809445135290374
AL5G14730	AT3G26050	OG0014887	.	protein_coding	TPX2 (targeting protein for Xklp2) protein family	.	TPX2 (targeting protein for Xklp2) protein family%3B FUNCTIONS IN: molecular_function unknown%3B INVOLVED IN: biological_process unknown%3B LOCATED IN: chloroplast%3B EXPRESSED IN: 11 plant structures%3B EXPRESSED DURING: 6 growth stages%3B CONTAINS InterPro DOMAIN/s: Xklp2 targeting protein (InterPro:IPR009675)%3B BEST Arabidopsis thaliana protein match is: unknown protein (TAIR:AT3G27350.1)%3B …	.	TPX2 (targeting protein for Xklp2) protein family%3B FUNCTIONS IN: molecular_function unknown%3B INVOLVED IN: biological_process unknown%3B LOCATED IN: chloroplast%3B EXPRESSED IN: 11 plant structures%3B EXPRESSED DURING: 6 growth stages%3B CONTAINS InterPro DOMAIN/s: Xklp2 targeting protein (InterPro:IPR009675)%3B BEST Arabidopsis thaliana protein match is: unknown protein (TAIR:AT3G27350.1)%3B …	scaffold_5	2634570	2637311	2742	+	scaffold_5	2635464	2636173	710	*	0.874025106	-0.018160552	204.681857	0.888	5.50073114	0.012212842	0.9682	0.242285714	0.888	0.029052632	0.011428571	0.568	0.325714286	-2.199871934	-3.314411201	-3.222055825	-2.497912914	72	MODIFIER	MODERATE	NO	NO	NO	B	B	-1.53001338034238	-3.62732960161472	-2.01028214347992	0	-0.809445135290374
AL5G14730	AT3G26050	OG0014887	.	protein_coding	TPX2 (targeting protein for Xklp2) protein family	.	TPX2 (targeting protein for Xklp2) protein family%3B FUNCTIONS IN: molecular_function unknown%3B INVOLVED IN: biological_process unknown%3B LOCATED IN: chloroplast%3B EXPRESSED IN: 11 plant structures%3B EXPRESSED DURING: 6 growth stages%3B CONTAINS InterPro DOMAIN/s: Xklp2 targeting protein (InterPro:IPR009675)%3B BEST Arabidopsis thaliana protein match is: unknown protein (TAIR:AT3G27350.1)%3B …	.	TPX2 (targeting protein for Xklp2) protein family%3B FUNCTIONS IN: molecular_function unknown%3B INVOLVED IN: biological_process unknown%3B LOCATED IN: chloroplast%3B EXPRESSED IN: 11 plant structures%3B EXPRESSED DURING: 6 growth stages%3B CONTAINS InterPro DOMAIN/s: Xklp2 targeting protein (InterPro:IPR009675)%3B BEST Arabidopsis thaliana protein match is: unknown protein (TAIR:AT3G27350.1)%3B …	scaffold_5	2634570	2637311	2742	+	scaffold_5	2635464	2636173	710	*	0.874025106	-0.018160552	204.681857	0.888	5.50073114	0.012212842	0.9682	0.242285714	0.888	0.029052632	0.011428571	0.568	0.325714286	-2.199871934	-3.314411201	-3.222055825	-2.497912914	59	MODIFIER	MODERATE	NO	NO	NO	B	B	-1.53001338034238	-3.62732960161472	-2.01028214347992	0	-0.809445135290374
AL5G14730	AT3G26050	OG0014887	.	protein_coding	TPX2 (targeting protein for Xklp2) protein family	.	TPX2 (targeting protein for Xklp2) protein family%3B FUNCTIONS IN: molecular_function unknown%3B INVOLVED IN: biological_process unknown%3B LOCATED IN: chloroplast%3B EXPRESSED IN: 11 plant structures%3B EXPRESSED DURING: 6 growth stages%3B CONTAINS InterPro DOMAIN/s: Xklp2 targeting protein (InterPro:IPR009675)%3B BEST Arabidopsis thaliana protein match is: unknown protein (TAIR:AT3G27350.1)%3B …	.	TPX2 (targeting protein for Xklp2) protein family%3B FUNCTIONS IN: molecular_function unknown%3B INVOLVED IN: biological_process unknown%3B LOCATED IN: chloroplast%3B EXPRESSED IN: 11 plant structures%3B EXPRESSED DURING: 6 growth stages%3B CONTAINS InterPro DOMAIN/s: Xklp2 targeting protein (InterPro:IPR009675)%3B BEST Arabidopsis thaliana protein match is: unknown protein (TAIR:AT3G27350.1)%3B …	scaffold_5	2634570	2637311	2742	+	scaffold_5	2635464	2636173	710	*	0.874025106	-0.018160552	204.681857	0.888	5.50073114	0.012212842	0.9682	0.242285714	0.888	0.029052632	0.011428571	0.568	0.325714286	-2.199871934	-3.314411201	-3.222055825	-2.497912914	73	MODIFIER	MODERATE	NO	NO	NO	B	B	-1.53001338034238	-3.62732960161472	-2.01028214347992	0	-0.809445135290374
AL5G40920	AT3G59040	OG0016506	.	protein_coding	Tetratricopeptide repeat (TPR)-like superfamily protein	.	Tetratricopeptide repeat (TPR)-like superfamily protein%3B FUNCTIONS IN: molecular_function unknown%3B INVOLVED IN: biological_process unknown%3B LOCATED IN: chloroplast%3B EXPRESSED IN: 22 plant structures%3B EXPRESSED DURING: 13 growth stages%3B CONTAINS InterPro DOMAIN/s: Pentatricopeptide repeat (InterPro:IPR002885)%3B BEST Arabidopsis thaliana protein match is: Pentatricopeptide repeat (PPR)…	.	Tetratricopeptide repeat (TPR)-like superfamily protein%3B FUNCTIONS IN: molecular_function unknown%3B INVOLVED IN: biological_process unknown%3B LOCATED IN: chloroplast%3B EXPRESSED IN: 22 plant structures%3B EXPRESSED DURING: 13 growth stages%3B CONTAINS InterPro DOMAIN/s: Pentatricopeptide repeat (InterPro:IPR002885)%3B BEST Arabidopsis thaliana protein match is: Pentatricopeptide repeat (PPR)…	scaffold_5	19168337	19171245	2909	-	scaffold_5	19170109	19172098	1990	*	0.885800168	-0.04478389	213.0453199	0.897142857	5.481655704	0.012212842	8	-0.177142857	0.897142857	0	0.05010989	0.36	0.537142857	-2.452671681	-2.891322731	-2.146447256	-3.889237465	63	MODIFIER	NO	NO	NO	NO	A	B	-2.5325186144801	-2.5726650706807	0	-0.00826125459422843	-1.811950369428094
AL5G40920	AT3G59040	OG0016506	.	protein_coding	Tetratricopeptide repeat (TPR)-like superfamily protein	.	Tetratricopeptide repeat (TPR)-like superfamily protein%3B FUNCTIONS IN: molecular_function unknown%3B INVOLVED IN: biological_process unknown%3B LOCATED IN: chloroplast%3B EXPRESSED IN: 22 plant structures%3B EXPRESSED DURING: 13 growth stages%3B CONTAINS InterPro DOMAIN/s: Pentatricopeptide repeat (InterPro:IPR002885)%3B BEST Arabidopsis thaliana protein match is: Pentatricopeptide repeat (PPR)…	.	Tetratricopeptide repeat (TPR)-like superfamily protein%3B FUNCTIONS IN: molecular_function unknown%3B INVOLVED IN: biological_process unknown%3B LOCATED IN: chloroplast%3B EXPRESSED IN: 22 plant structures%3B EXPRESSED DURING: 13 growth stages%3B CONTAINS InterPro DOMAIN/s: Pentatricopeptide repeat (InterPro:IPR002885)%3B BEST Arabidopsis thaliana protein match is: Pentatricopeptide repeat (PPR)…	scaffold_5	19168337	19171245	2909	-	scaffold_5	19168963	19170098	1136	*	0.814036225	-0.056838531	207.2701751	0.837142857	4.966938827	0.012212842	8.2915	-0.517142857	0.837142857	0	0.103296703	0.16	0.677142857	-2.452671681	-2.309576085	-0.953976558	-4.60754921	117	MODIFIER	MODERATE	NO	NO	NO	A	B	-2.5325186144801	-2.5726650706807	0	-0.00826125459422843	-1.811950369428094
AL5G40920	AT3G59040	OG0016506	.	protein_coding	Tetratricopeptide repeat (TPR)-like superfamily protein	.	Tetratricopeptide repeat (TPR)-like superfamily protein%3B FUNCTIONS IN: molecular_function unknown%3B INVOLVED IN: biological_process unknown%3B LOCATED IN: chloroplast%3B EXPRESSED IN: 22 plant structures%3B EXPRESSED DURING: 13 growth stages%3B CONTAINS InterPro DOMAIN/s: Pentatricopeptide repeat (InterPro:IPR002885)%3B BEST Arabidopsis thaliana protein match is: Pentatricopeptide repeat (PPR)…	.	Tetratricopeptide repeat (TPR)-like superfamily protein%3B FUNCTIONS IN: molecular_function unknown%3B INVOLVED IN: biological_process unknown%3B LOCATED IN: chloroplast%3B EXPRESSED IN: 22 plant structures%3B EXPRESSED DURING: 13 growth stages%3B CONTAINS InterPro DOMAIN/s: Pentatricopeptide repeat (InterPro:IPR002885)%3B BEST Arabidopsis thaliana protein match is: Pentatricopeptide repeat (PPR)…	scaffold_5	19168337	19171245	2909	-	scaffold_5	19170109	19172098	1990	*	0.885800168	-0.04478389	213.0453199	0.897142857	5.481655704	0.012212842	8	-0.177142857	0.897142857	0	0.05010989	0.36	0.537142857	-2.452671681	-2.891322731	-2.146447256	-3.889237465	61	MODIFIER	NO	NO	NO	NO	A	B	-2.5325186144801	-2.5726650706807	0	-0.00826125459422843	-1.811950369428094
AL5G40920	AT3G59040	OG0016506	.	protein_coding	Tetratricopeptide repeat (TPR)-like superfamily protein	.	Tetratricopeptide repeat (TPR)-like superfamily protein%3B FUNCTIONS IN: molecular_function unknown%3B INVOLVED IN: biological_process unknown%3B LOCATED IN: chloroplast%3B EXPRESSED IN: 22 plant structures%3B EXPRESSED DURING: 13 growth stages%3B CONTAINS InterPro DOMAIN/s: Pentatricopeptide repeat (InterPro:IPR002885)%3B BEST Arabidopsis thaliana protein match is: Pentatricopeptide repeat (PPR)…	.	Tetratricopeptide repeat (TPR)-like superfamily protein%3B FUNCTIONS IN: molecular_function unknown%3B INVOLVED IN: biological_process unknown%3B LOCATED IN: chloroplast%3B EXPRESSED IN: 22 plant structures%3B EXPRESSED DURING: 13 growth stages%3B CONTAINS InterPro DOMAIN/s: Pentatricopeptide repeat (InterPro:IPR002885)%3B BEST Arabidopsis thaliana protein match is: Pentatricopeptide repeat (PPR)…	scaffold_5	19168337	19171245	2909	-	scaffold_5	19170109	19172098	1990	*	0.885800168	-0.04478389	213.0453199	0.897142857	5.481655704	0.012212842	8	-0.177142857	0.897142857	0	0.05010989	0.36	0.537142857	-2.452671681	-2.891322731	-2.146447256	-3.889237465	67	MODIFIER	NO	NO	NO	NO	A	B	-2.5325186144801	-2.5726650706807	0	-0.00826125459422843	-1.811950369428094
AL5G40920	AT3G59040	OG0016506	.	protein_coding	Tetratricopeptide repeat (TPR)-like superfamily protein	.	Tetratricopeptide repeat (TPR)-like superfamily protein%3B FUNCTIONS IN: molecular_function unknown%3B INVOLVED IN: biological_process unknown%3B LOCATED IN: chloroplast%3B EXPRESSED IN: 22 plant structures%3B EXPRESSED DURING: 13 growth stages%3B CONTAINS InterPro DOMAIN/s: Pentatricopeptide repeat (InterPro:IPR002885)%3B BEST Arabidopsis thaliana protein match is: Pentatricopeptide repeat (PPR)…	.	Tetratricopeptide repeat (TPR)-like superfamily protein%3B FUNCTIONS IN: molecular_function unknown%3B INVOLVED IN: biological_process unknown%3B LOCATED IN: chloroplast%3B EXPRESSED IN: 22 plant structures%3B EXPRESSED DURING: 13 growth stages%3B CONTAINS InterPro DOMAIN/s: Pentatricopeptide repeat (InterPro:IPR002885)%3B BEST Arabidopsis thaliana protein match is: Pentatricopeptide repeat (PPR)…	scaffold_5	19168337	19171245	2909	-	scaffold_5	19172146	19172833	688	*	0.9339765	-0.036173432	221.2710613	0.94	5.827189524	0.012212842	2.1154	0.18	0.94	0	0.026813187	0.56	0.38	-2.452671681	-3.146137377	-3.338917953	-2.815005486	39	MODIFIER	NO	NO	NO	NO	A	B	-2.38876314694337	-2.73999165491543	-1.44740314330555	-0.346972692957628	-1.6681949018913638
AL5G40920	AT3G59040	OG0016506	.	protein_coding	Tetratricopeptide repeat (TPR)-like superfamily protein	.	Tetratricopeptide repeat (TPR)-like superfamily protein%3B FUNCTIONS IN: molecular_function unknown%3B INVOLVED IN: biological_process unknown%3B LOCATED IN: chloroplast%3B EXPRESSED IN: 22 plant structures%3B EXPRESSED DURING: 13 growth stages%3B CONTAINS InterPro DOMAIN/s: Pentatricopeptide repeat (InterPro:IPR002885)%3B BEST Arabidopsis thaliana protein match is: Pentatricopeptide repeat (PPR)…	.	Tetratricopeptide repeat (TPR)-like superfamily protein%3B FUNCTIONS IN: molecular_function unknown%3B INVOLVED IN: biological_process unknown%3B LOCATED IN: chloroplast%3B EXPRESSED IN: 22 plant structures%3B EXPRESSED DURING: 13 growth stages%3B CONTAINS InterPro DOMAIN/s: Pentatricopeptide repeat (InterPro:IPR002885)%3B BEST Arabidopsis thaliana protein match is: Pentatricopeptide repeat (PPR)…	scaffold_5	19168337	19171245	2909	-	scaffold_5	19172946	19173419	474	*	0.801825126	-0.042772063	176.5091354	0.832857143	4.937495402	0.012212842	5.5434	0.440571429	0.829142857	0.016	0.087472527	0.672	0.231428571	-2.313448632	-2.482657732	-3.916073771	-1.190714964	123	MODIFIER	NO	NO	NO	NO	A	B	-2.38876314694337	-2.43576150176138	-1.44740314330555	-1.25571069832284	-1.6681949018913638
AL5G40920	AT3G59040	OG0016506	.	protein_coding	Tetratricopeptide repeat (TPR)-like superfamily protein	.	Tetratricopeptide repeat (TPR)-like superfamily protein%3B FUNCTIONS IN: molecular_function unknown%3B INVOLVED IN: biological_process unknown%3B LOCATED IN: chloroplast%3B EXPRESSED IN: 22 plant structures%3B EXPRESSED DURING: 13 growth stages%3B CONTAINS InterPro DOMAIN/s: Pentatricopeptide repeat (InterPro:IPR002885)%3B BEST Arabidopsis thaliana protein match is: Pentatricopeptide repeat (PPR)…	.	Tetratricopeptide repeat (TPR)-like superfamily protein%3B FUNCTIONS IN: molecular_function unknown%3B INVOLVED IN: biological_process unknown%3B LOCATED IN: chloroplast%3B EXPRESSED IN: 22 plant structures%3B EXPRESSED DURING: 13 growth stages%3B CONTAINS InterPro DOMAIN/s: Pentatricopeptide repeat (InterPro:IPR002885)%3B BEST Arabidopsis thaliana protein match is: Pentatricopeptide repeat (PPR)…	scaffold_5	19168337	19171245	2909	-	scaffold_5	19172146	19172833	688	*	0.9339765	-0.036173432	221.2710613	0.94	5.827189524	0.012212842	2.1154	0.18	0.94	0	0.026813187	0.56	0.38	-2.452671681	-3.146137377	-3.338917953	-2.815005486	41	MODIFIER	NO	NO	NO	NO	A	B	-2.38876314694337	-2.73999165491543	-1.44740314330555	-0.346972692957628	-1.6681949018913638
AL5G40920	AT3G59040	OG0016506	.	protein_coding	Tetratricopeptide repeat (TPR)-like superfamily protein	.	Tetratricopeptide repeat (TPR)-like superfamily protein%3B FUNCTIONS IN: molecular_function unknown%3B INVOLVED IN: biological_process unknown%3B LOCATED IN: chloroplast%3B EXPRESSED IN: 22 plant structures%3B EXPRESSED DURING: 13 growth stages%3B CONTAINS InterPro DOMAIN/s: Pentatricopeptide repeat (InterPro:IPR002885)%3B BEST Arabidopsis thaliana protein match is: Pentatricopeptide repeat (PPR)…	.	Tetratricopeptide repeat (TPR)-like superfamily protein%3B FUNCTIONS IN: molecular_function unknown%3B INVOLVED IN: biological_process unknown%3B LOCATED IN: chloroplast%3B EXPRESSED IN: 22 plant structures%3B EXPRESSED DURING: 13 growth stages%3B CONTAINS InterPro DOMAIN/s: Pentatricopeptide repeat (InterPro:IPR002885)%3B BEST Arabidopsis thaliana protein match is: Pentatricopeptide repeat (PPR)…	scaffold_5	19168337	19171245	2909	-	scaffold_5	19170109	19172098	1990	*	0.885800168	-0.04478389	213.0453199	0.897142857	5.481655704	0.012212842	8	-0.177142857	0.897142857	0	0.05010989	0.36	0.537142857	-2.452671681	-2.891322731	-2.146447256	-3.889237465	65	MODIFIER	NO	NO	NO	NO	A	B	-2.5325186144801	-2.5726650706807	0	-0.00826125459422843	-1.811950369428094
AL5G40920	AT3G59040	OG0016506	.	protein_coding	Tetratricopeptide repeat (TPR)-like superfamily protein	.	Tetratricopeptide repeat (TPR)-like superfamily protein%3B FUNCTIONS IN: molecular_function unknown%3B INVOLVED IN: biological_process unknown%3B LOCATED IN: chloroplast%3B EXPRESSED IN: 22 plant structures%3B EXPRESSED DURING: 13 growth stages%3B CONTAINS InterPro DOMAIN/s: Pentatricopeptide repeat (InterPro:IPR002885)%3B BEST Arabidopsis thaliana protein match is: Pentatricopeptide repeat (PPR)…	.	Tetratricopeptide repeat (TPR)-like superfamily protein%3B FUNCTIONS IN: molecular_function unknown%3B INVOLVED IN: biological_process unknown%3B LOCATED IN: chloroplast%3B EXPRESSED IN: 22 plant structures%3B EXPRESSED DURING: 13 growth stages%3B CONTAINS InterPro DOMAIN/s: Pentatricopeptide repeat (InterPro:IPR002885)%3B BEST Arabidopsis thaliana protein match is: Pentatricopeptide repeat (PPR)…	scaffold_5	19168337	19171245	2909	-	scaffold_5	19168963	19170098	1136	*	0.814036225	-0.056838531	207.2701751	0.837142857	4.966938827	0.012212842	8.2915	-0.517142857	0.837142857	0	0.103296703	0.16	0.677142857	-2.452671681	-2.309576085	-0.953976558	-4.60754921	118	MODIFIER	MODERATE	NO	NO	NO	A	B	-2.5325186144801	-2.5726650706807	0	-0.00826125459422843	-1.811950369428094
AL5G40930	AT2G43020	OG0001564	PAO2	protein_coding	polyamine oxidase 2	polyamine oxidase 2	polyamine oxidase 2 (PAO2)%3B FUNCTIONS IN: primary amine oxidase activity%2C oxidoreductase activity%3B INVOLVED IN: oxidation reduction%3B LOCATED IN: cellular_component unknown%3B EXPRESSED IN: sperm cell%2C male gametophyte%2C pollen tube%3B EXPRESSED DURING: L mature pollen stage%2C M germinated pollen stage%3B CONTAINS InterPro DOMAIN/s: Amine oxidase (InterPro:IPR002937)%2C Flavin-containi…	Encodes a polyamine oxidase.	polyamine oxidase 2 (PAO2)%3B FUNCTIONS IN: primary amine oxidase activity%2C oxidoreductase activity%3B INVOLVED IN: oxidation reduction%3B LOCATED IN: cellular_component unknown%3B EXPRESSED IN: sperm cell%2C male gametophyte%2C pollen tube%3B EXPRESSED DURING: L mature pollen stage%2C M germinated pollen stage%3B CONTAINS InterPro DOMAIN/s: Amine oxidase (InterPro:IPR002937)%2C Flavin-containi…	scaffold_5	19171702	19174805	3104	-	scaffold_5	19172146	19172833	688	*	0.9339765	-0.036173432	221.2710613	0.94	5.827189524	0.012212842	2.1154	0.18	0.94	0	0.026813187	0.56	0.38	-2.452671681	-3.146137377	-3.338917953	-2.815005486	39	MODIFIER	MODERATE	NO	NO	NO	A	B	-2.38876314694337	-2.73999165491543	-1.44740314330555	-0.346972692957628	-1.6681949018913638
AL5G40930	AT2G43020	OG0001564	PAO2	protein_coding	polyamine oxidase 2	polyamine oxidase 2	polyamine oxidase 2 (PAO2)%3B FUNCTIONS IN: primary amine oxidase activity%2C oxidoreductase activity%3B INVOLVED IN: oxidation reduction%3B LOCATED IN: cellular_component unknown%3B EXPRESSED IN: sperm cell%2C male gametophyte%2C pollen tube%3B EXPRESSED DURING: L mature pollen stage%2C M germinated pollen stage%3B CONTAINS InterPro DOMAIN/s: Amine oxidase (InterPro:IPR002937)%2C Flavin-containi…	Encodes a polyamine oxidase.	polyamine oxidase 2 (PAO2)%3B FUNCTIONS IN: primary amine oxidase activity%2C oxidoreductase activity%3B INVOLVED IN: oxidation reduction%3B LOCATED IN: cellular_component unknown%3B EXPRESSED IN: sperm cell%2C male gametophyte%2C pollen tube%3B EXPRESSED DURING: L mature pollen stage%2C M germinated pollen stage%3B CONTAINS InterPro DOMAIN/s: Amine oxidase (InterPro:IPR002937)%2C Flavin-containi…	scaffold_5	19171702	19174805	3104	-	scaffold_5	19170109	19172098	1990	*	0.885800168	-0.04478389	213.0453199	0.897142857	5.481655704	0.012212842	8	-0.177142857	0.897142857	0	0.05010989	0.36	0.537142857	-2.452671681	-2.891322731	-2.146447256	-3.889237465	65	MODIFIER	NO	NO	NO	NO	A	B	-2.5325186144801	-2.5726650706807	0	-0.00826125459422843	-1.811950369428094
AL5G40930	AT2G43020	OG0001564	PAO2	protein_coding	polyamine oxidase 2	polyamine oxidase 2	polyamine oxidase 2 (PAO2)%3B FUNCTIONS IN: primary amine oxidase activity%2C oxidoreductase activity%3B INVOLVED IN: oxidation reduction%3B LOCATED IN: cellular_component unknown%3B EXPRESSED IN: sperm cell%2C male gametophyte%2C pollen tube%3B EXPRESSED DURING: L mature pollen stage%2C M germinated pollen stage%3B CONTAINS InterPro DOMAIN/s: Amine oxidase (InterPro:IPR002937)%2C Flavin-containi…	Encodes a polyamine oxidase.	polyamine oxidase 2 (PAO2)%3B FUNCTIONS IN: primary amine oxidase activity%2C oxidoreductase activity%3B INVOLVED IN: oxidation reduction%3B LOCATED IN: cellular_component unknown%3B EXPRESSED IN: sperm cell%2C male gametophyte%2C pollen tube%3B EXPRESSED DURING: L mature pollen stage%2C M germinated pollen stage%3B CONTAINS InterPro DOMAIN/s: Amine oxidase (InterPro:IPR002937)%2C Flavin-containi…	scaffold_5	19171702	19174805	3104	-	scaffold_5	19170109	19172098	1990	*	0.885800168	-0.04478389	213.0453199	0.897142857	5.481655704	0.012212842	8	-0.177142857	0.897142857	0	0.05010989	0.36	0.537142857	-2.452671681	-2.891322731	-2.146447256	-3.889237465	63	MODIFIER	NO	NO	NO	NO	A	B	-2.5325186144801	-2.5726650706807	0	-0.00826125459422843	-1.811950369428094
AL5G40930	AT2G43020	OG0001564	PAO2	protein_coding	polyamine oxidase 2	polyamine oxidase 2	polyamine oxidase 2 (PAO2)%3B FUNCTIONS IN: primary amine oxidase activity%2C oxidoreductase activity%3B INVOLVED IN: oxidation reduction%3B LOCATED IN: cellular_component unknown%3B EXPRESSED IN: sperm cell%2C male gametophyte%2C pollen tube%3B EXPRESSED DURING: L mature pollen stage%2C M germinated pollen stage%3B CONTAINS InterPro DOMAIN/s: Amine oxidase (InterPro:IPR002937)%2C Flavin-containi…	Encodes a polyamine oxidase.	polyamine oxidase 2 (PAO2)%3B FUNCTIONS IN: primary amine oxidase activity%2C oxidoreductase activity%3B INVOLVED IN: oxidation reduction%3B LOCATED IN: cellular_component unknown%3B EXPRESSED IN: sperm cell%2C male gametophyte%2C pollen tube%3B EXPRESSED DURING: L mature pollen stage%2C M germinated pollen stage%3B CONTAINS InterPro DOMAIN/s: Amine oxidase (InterPro:IPR002937)%2C Flavin-containi…	scaffold_5	19171702	19174805	3104	-	scaffold_5	19170109	19172098	1990	*	0.885800168	-0.04478389	213.0453199	0.897142857	5.481655704	0.012212842	8	-0.177142857	0.897142857	0	0.05010989	0.36	0.537142857	-2.452671681	-2.891322731	-2.146447256	-3.889237465	63	MODIFIER	NO	NO	NO	NO	A	B	-2.5325186144801	-2.5726650706807	0	-0.00826125459422843	-1.811950369428094
AL5G40930	AT2G43020	OG0001564	PAO2	protein_coding	polyamine oxidase 2	polyamine oxidase 2	polyamine oxidase 2 (PAO2)%3B FUNCTIONS IN: primary amine oxidase activity%2C oxidoreductase activity%3B INVOLVED IN: oxidation reduction%3B LOCATED IN: cellular_component unknown%3B EXPRESSED IN: sperm cell%2C male gametophyte%2C pollen tube%3B EXPRESSED DURING: L mature pollen stage%2C M germinated pollen stage%3B CONTAINS InterPro DOMAIN/s: Amine oxidase (InterPro:IPR002937)%2C Flavin-containi…	Encodes a polyamine oxidase.	polyamine oxidase 2 (PAO2)%3B FUNCTIONS IN: primary amine oxidase activity%2C oxidoreductase activity%3B INVOLVED IN: oxidation reduction%3B LOCATED IN: cellular_component unknown%3B EXPRESSED IN: sperm cell%2C male gametophyte%2C pollen tube%3B EXPRESSED DURING: L mature pollen stage%2C M germinated pollen stage%3B CONTAINS InterPro DOMAIN/s: Amine oxidase (InterPro:IPR002937)%2C Flavin-containi…	scaffold_5	19171702	19174805	3104	-	scaffold_5	19172946	19173419	474	*	0.801825126	-0.042772063	176.5091354	0.832857143	4.937495402	0.012212842	5.5434	0.440571429	0.829142857	0.016	0.087472527	0.672	0.231428571	-2.313448632	-2.482657732	-3.916073771	-1.190714964	123	MODIFIER	MODERATE	NO	NO	NO	A	B	-2.38876314694337	-2.43576150176138	-1.44740314330555	-1.25571069832284	-1.6681949018913638
AL5G40930	AT2G43020	OG0001564	PAO2	protein_coding	polyamine oxidase 2	polyamine oxidase 2	polyamine oxidase 2 (PAO2)%3B FUNCTIONS IN: primary amine oxidase activity%2C oxidoreductase activity%3B INVOLVED IN: oxidation reduction%3B LOCATED IN: cellular_component unknown%3B EXPRESSED IN: sperm cell%2C male gametophyte%2C pollen tube%3B EXPRESSED DURING: L mature pollen stage%2C M germinated pollen stage%3B CONTAINS InterPro DOMAIN/s: Amine oxidase (InterPro:IPR002937)%2C Flavin-containi…	Encodes a polyamine oxidase.	polyamine oxidase 2 (PAO2)%3B FUNCTIONS IN: primary amine oxidase activity%2C oxidoreductase activity%3B INVOLVED IN: oxidation reduction%3B LOCATED IN: cellular_component unknown%3B EXPRESSED IN: sperm cell%2C male gametophyte%2C pollen tube%3B EXPRESSED DURING: L mature pollen stage%2C M germinated pollen stage%3B CONTAINS InterPro DOMAIN/s: Amine oxidase (InterPro:IPR002937)%2C Flavin-containi…	scaffold_5	19171702	19174805	3104	-	scaffold_5	19170109	19172098	1990	*	0.885800168	-0.04478389	213.0453199	0.897142857	5.481655704	0.012212842	8	-0.177142857	0.897142857	0	0.05010989	0.36	0.537142857	-2.452671681	-2.891322731	-2.146447256	-3.889237465	65	MODIFIER	NO	NO	NO	NO	A	B	-2.5325186144801	-2.5726650706807	0	-0.00826125459422843	-1.811950369428094
AL5G40930	AT2G43020	OG0001564	PAO2	protein_coding	polyamine oxidase 2	polyamine oxidase 2	polyamine oxidase 2 (PAO2)%3B FUNCTIONS IN: primary amine oxidase activity%2C oxidoreductase activity%3B INVOLVED IN: oxidation reduction%3B LOCATED IN: cellular_component unknown%3B EXPRESSED IN: sperm cell%2C male gametophyte%2C pollen tube%3B EXPRESSED DURING: L mature pollen stage%2C M germinated pollen stage%3B CONTAINS InterPro DOMAIN/s: Amine oxidase (InterPro:IPR002937)%2C Flavin-containi…	Encodes a polyamine oxidase.	polyamine oxidase 2 (PAO2)%3B FUNCTIONS IN: primary amine oxidase activity%2C oxidoreductase activity%3B INVOLVED IN: oxidation reduction%3B LOCATED IN: cellular_component unknown%3B EXPRESSED IN: sperm cell%2C male gametophyte%2C pollen tube%3B EXPRESSED DURING: L mature pollen stage%2C M germinated pollen stage%3B CONTAINS InterPro DOMAIN/s: Amine oxidase (InterPro:IPR002937)%2C Flavin-containi…	scaffold_5	19171702	19174805	3104	-	scaffold_5	19172146	19172833	688	*	0.9339765	-0.036173432	221.2710613	0.94	5.827189524	0.012212842	2.1154	0.18	0.94	0	0.026813187	0.56	0.38	-2.452671681	-3.146137377	-3.338917953	-2.815005486	41	MODIFIER	MODERATE	NO	NO	NO	A	B	-2.38876314694337	-2.73999165491543	-1.44740314330555	-0.346972692957628	-1.6681949018913638
AL5G40930	AT2G43020	OG0001564	PAO2	protein_coding	polyamine oxidase 2	polyamine oxidase 2	polyamine oxidase 2 (PAO2)%3B FUNCTIONS IN: primary amine oxidase activity%2C oxidoreductase activity%3B INVOLVED IN: oxidation reduction%3B LOCATED IN: cellular_component unknown%3B EXPRESSED IN: sperm cell%2C male gametophyte%2C pollen tube%3B EXPRESSED DURING: L mature pollen stage%2C M germinated pollen stage%3B CONTAINS InterPro DOMAIN/s: Amine oxidase (InterPro:IPR002937)%2C Flavin-containi…	Encodes a polyamine oxidase.	polyamine oxidase 2 (PAO2)%3B FUNCTIONS IN: primary amine oxidase activity%2C oxidoreductase activity%3B INVOLVED IN: oxidation reduction%3B LOCATED IN: cellular_component unknown%3B EXPRESSED IN: sperm cell%2C male gametophyte%2C pollen tube%3B EXPRESSED DURING: L mature pollen stage%2C M germinated pollen stage%3B CONTAINS InterPro DOMAIN/s: Amine oxidase (InterPro:IPR002937)%2C Flavin-containi…	scaffold_5	19171702	19174805	3104	-	scaffold_5	19172146	19172833	688	*	0.9339765	-0.036173432	221.2710613	0.94	5.827189524	0.012212842	2.1154	0.18	0.94	0	0.026813187	0.56	0.38	-2.452671681	-3.146137377	-3.338917953	-2.815005486	39	MODIFIER	MODERATE	NO	NO	NO	A	B	-2.38876314694337	-2.73999165491543	-1.44740314330555	-0.346972692957628	-1.6681949018913638
AL5G40930	AT2G43020	OG0001564	PAO2	protein_coding	polyamine oxidase 2	polyamine oxidase 2	polyamine oxidase 2 (PAO2)%3B FUNCTIONS IN: primary amine oxidase activity%2C oxidoreductase activity%3B INVOLVED IN: oxidation reduction%3B LOCATED IN: cellular_component unknown%3B EXPRESSED IN: sperm cell%2C male gametophyte%2C pollen tube%3B EXPRESSED DURING: L mature pollen stage%2C M germinated pollen stage%3B CONTAINS InterPro DOMAIN/s: Amine oxidase (InterPro:IPR002937)%2C Flavin-containi…	Encodes a polyamine oxidase.	polyamine oxidase 2 (PAO2)%3B FUNCTIONS IN: primary amine oxidase activity%2C oxidoreductase activity%3B INVOLVED IN: oxidation reduction%3B LOCATED IN: cellular_component unknown%3B EXPRESSED IN: sperm cell%2C male gametophyte%2C pollen tube%3B EXPRESSED DURING: L mature pollen stage%2C M germinated pollen stage%3B CONTAINS InterPro DOMAIN/s: Amine oxidase (InterPro:IPR002937)%2C Flavin-containi…	scaffold_5	19171702	19174805	3104	-	scaffold_5	19170109	19172098	1990	*	0.885800168	-0.04478389	213.0453199	0.897142857	5.481655704	0.012212842	8	-0.177142857	0.897142857	0	0.05010989	0.36	0.537142857	-2.452671681	-2.891322731	-2.146447256	-3.889237465	67	MODIFIER	NO	NO	NO	NO	A	B	-2.5325186144801	-2.5726650706807	0	-0.00826125459422843	-1.811950369428094
AL5G40930	AT2G43020	OG0001564	PAO2	protein_coding	polyamine oxidase 2	polyamine oxidase 2	polyamine oxidase 2 (PAO2)%3B FUNCTIONS IN: primary amine oxidase activity%2C oxidoreductase activity%3B INVOLVED IN: oxidation reduction%3B LOCATED IN: cellular_component unknown%3B EXPRESSED IN: sperm cell%2C male gametophyte%2C pollen tube%3B EXPRESSED DURING: L mature pollen stage%2C M germinated pollen stage%3B CONTAINS InterPro DOMAIN/s: Amine oxidase (InterPro:IPR002937)%2C Flavin-containi…	Encodes a polyamine oxidase.	polyamine oxidase 2 (PAO2)%3B FUNCTIONS IN: primary amine oxidase activity%2C oxidoreductase activity%3B INVOLVED IN: oxidation reduction%3B LOCATED IN: cellular_component unknown%3B EXPRESSED IN: sperm cell%2C male gametophyte%2C pollen tube%3B EXPRESSED DURING: L mature pollen stage%2C M germinated pollen stage%3B CONTAINS InterPro DOMAIN/s: Amine oxidase (InterPro:IPR002937)%2C Flavin-containi…	scaffold_5	19171702	19174805	3104	-	scaffold_5	19172946	19173419	474	*	0.801825126	-0.042772063	176.5091354	0.832857143	4.937495402	0.012212842	5.5434	0.440571429	0.829142857	0.016	0.087472527	0.672	0.231428571	-2.313448632	-2.482657732	-3.916073771	-1.190714964	123	MODIFIER	MODERATE	NO	NO	NO	A	B	-2.38876314694337	-2.43576150176138	-1.44740314330555	-1.25571069832284	-1.6681949018913638
AL5G40930	AT2G43020	OG0001564	PAO2	protein_coding	polyamine oxidase 2	polyamine oxidase 2	polyamine oxidase 2 (PAO2)%3B FUNCTIONS IN: primary amine oxidase activity%2C oxidoreductase activity%3B INVOLVED IN: oxidation reduction%3B LOCATED IN: cellular_component unknown%3B EXPRESSED IN: sperm cell%2C male gametophyte%2C pollen tube%3B EXPRESSED DURING: L mature pollen stage%2C M germinated pollen stage%3B CONTAINS InterPro DOMAIN/s: Amine oxidase (InterPro:IPR002937)%2C Flavin-containi…	Encodes a polyamine oxidase.	polyamine oxidase 2 (PAO2)%3B FUNCTIONS IN: primary amine oxidase activity%2C oxidoreductase activity%3B INVOLVED IN: oxidation reduction%3B LOCATED IN: cellular_component unknown%3B EXPRESSED IN: sperm cell%2C male gametophyte%2C pollen tube%3B EXPRESSED DURING: L mature pollen stage%2C M germinated pollen stage%3B CONTAINS InterPro DOMAIN/s: Amine oxidase (InterPro:IPR002937)%2C Flavin-containi…	scaffold_5	19171702	19174805	3104	-	scaffold_5	19170109	19172098	1990	*	0.885800168	-0.04478389	213.0453199	0.897142857	5.481655704	0.012212842	8	-0.177142857	0.897142857	0	0.05010989	0.36	0.537142857	-2.452671681	-2.891322731	-2.146447256	-3.889237465	67	MODIFIER	NO	NO	NO	NO	A	B	-2.5325186144801	-2.5726650706807	0	-0.00826125459422843	-1.811950369428094
AL5G40930	AT2G43020	OG0001564	PAO2	protein_coding	polyamine oxidase 2	polyamine oxidase 2	polyamine oxidase 2 (PAO2)%3B FUNCTIONS IN: primary amine oxidase activity%2C oxidoreductase activity%3B INVOLVED IN: oxidation reduction%3B LOCATED IN: cellular_component unknown%3B EXPRESSED IN: sperm cell%2C male gametophyte%2C pollen tube%3B EXPRESSED DURING: L mature pollen stage%2C M germinated pollen stage%3B CONTAINS InterPro DOMAIN/s: Amine oxidase (InterPro:IPR002937)%2C Flavin-containi…	Encodes a polyamine oxidase.	polyamine oxidase 2 (PAO2)%3B FUNCTIONS IN: primary amine oxidase activity%2C oxidoreductase activity%3B INVOLVED IN: oxidation reduction%3B LOCATED IN: cellular_component unknown%3B EXPRESSED IN: sperm cell%2C male gametophyte%2C pollen tube%3B EXPRESSED DURING: L mature pollen stage%2C M germinated pollen stage%3B CONTAINS InterPro DOMAIN/s: Amine oxidase (InterPro:IPR002937)%2C Flavin-containi…	scaffold_5	19171702	19174805	3104	-	scaffold_5	19170109	19172098	1990	*	0.885800168	-0.04478389	213.0453199	0.897142857	5.481655704	0.012212842	8	-0.177142857	0.897142857	0	0.05010989	0.36	0.537142857	-2.452671681	-2.891322731	-2.146447256	-3.889237465	61	MODIFIER	NO	NO	NO	NO	A	B	-2.5325186144801	-2.5726650706807	0	-0.00826125459422843	-1.811950369428094
AL5G40930	AT2G43020	OG0001564	PAO2	protein_coding	polyamine oxidase 2	polyamine oxidase 2	polyamine oxidase 2 (PAO2)%3B FUNCTIONS IN: primary amine oxidase activity%2C oxidoreductase activity%3B INVOLVED IN: oxidation reduction%3B LOCATED IN: cellular_component unknown%3B EXPRESSED IN: sperm cell%2C male gametophyte%2C pollen tube%3B EXPRESSED DURING: L mature pollen stage%2C M germinated pollen stage%3B CONTAINS InterPro DOMAIN/s: Amine oxidase (InterPro:IPR002937)%2C Flavin-containi…	Encodes a polyamine oxidase.	polyamine oxidase 2 (PAO2)%3B FUNCTIONS IN: primary amine oxidase activity%2C oxidoreductase activity%3B INVOLVED IN: oxidation reduction%3B LOCATED IN: cellular_component unknown%3B EXPRESSED IN: sperm cell%2C male gametophyte%2C pollen tube%3B EXPRESSED DURING: L mature pollen stage%2C M germinated pollen stage%3B CONTAINS InterPro DOMAIN/s: Amine oxidase (InterPro:IPR002937)%2C Flavin-containi…	scaffold_5	19171702	19174805	3104	-	scaffold_5	19170109	19172098	1990	*	0.885800168	-0.04478389	213.0453199	0.897142857	5.481655704	0.012212842	8	-0.177142857	0.897142857	0	0.05010989	0.36	0.537142857	-2.452671681	-2.891322731	-2.146447256	-3.889237465	61	MODIFIER	NO	NO	NO	NO	A	B	-2.5325186144801	-2.5726650706807	0	-0.00826125459422843	-1.811950369428094
AL5G40930	AT2G43020	OG0001564	PAO2	protein_coding	polyamine oxidase 2	polyamine oxidase 2	polyamine oxidase 2 (PAO2)%3B FUNCTIONS IN: primary amine oxidase activity%2C oxidoreductase activity%3B INVOLVED IN: oxidation reduction%3B LOCATED IN: cellular_component unknown%3B EXPRESSED IN: sperm cell%2C male gametophyte%2C pollen tube%3B EXPRESSED DURING: L mature pollen stage%2C M germinated pollen stage%3B CONTAINS InterPro DOMAIN/s: Amine oxidase (InterPro:IPR002937)%2C Flavin-containi…	Encodes a polyamine oxidase.	polyamine oxidase 2 (PAO2)%3B FUNCTIONS IN: primary amine oxidase activity%2C oxidoreductase activity%3B INVOLVED IN: oxidation reduction%3B LOCATED IN: cellular_component unknown%3B EXPRESSED IN: sperm cell%2C male gametophyte%2C pollen tube%3B EXPRESSED DURING: L mature pollen stage%2C M germinated pollen stage%3B CONTAINS InterPro DOMAIN/s: Amine oxidase (InterPro:IPR002937)%2C Flavin-containi…	scaffold_5	19171702	19174805	3104	-	scaffold_5	19172146	19172833	688	*	0.9339765	-0.036173432	221.2710613	0.94	5.827189524	0.012212842	2.1154	0.18	0.94	0	0.026813187	0.56	0.38	-2.452671681	-3.146137377	-3.338917953	-2.815005486	41	MODIFIER	MODERATE	NO	NO	NO	A	B	-2.38876314694337	-2.73999165491543	-1.44740314330555	-0.346972692957628	-1.6681949018913638
AL5G40930	AT3G59050	OG0001564	PAO3	protein_coding	polyamine oxidase 3	polyamine oxidase 3	polyamine oxidase 3 (PAO3)%3B CONTAINS InterPro DOMAIN/s: Amine oxidase (InterPro:IPR002937)%2C Flavin-containing amine oxidase (InterPro:IPR001613)%3B BEST Arabidopsis thaliana protein match is: polyamine oxidase 2 (TAIR:AT2G43020.1)%3B Has 6641 Blast hits to 6191 proteins in 1102 species: Archae - 131%3B Bacteria - 2618%3B Metazoa - 1408%3B Fungi - 589%3B Plants - 766%3B Viruses - 0%3B Other Eu…	Encodes a polyamine oxidase.	polyamine oxidase 3 (PAO3)%3B CONTAINS InterPro DOMAIN/s: Amine oxidase (InterPro:IPR002937)%2C Flavin-containing amine oxidase (InterPro:IPR001613)%3B BEST Arabidopsis thaliana protein match is: polyamine oxidase 2 (TAIR:AT2G43020.1)%3B Has 6641 Blast hits to 6191 proteins in 1102 species: Archae - 131%3B Bacteria - 2618%3B Metazoa - 1408%3B Fungi - 589%3B Plants - 766%3B Viruses - 0%3B Other Eu…	scaffold_5	19171702	19174805	3104	-	scaffold_5	19172146	19172833	688	*	0.9339765	-0.036173432	221.2710613	0.94	5.827189524	0.012212842	2.1154	0.18	0.94	0	0.026813187	0.56	0.38	-2.452671681	-3.146137377	-3.338917953	-2.815005486	39	MODIFIER	MODERATE	NO	NO	NO	A	B	-2.38876314694337	-2.73999165491543	-1.44740314330555	-0.346972692957628	-1.6681949018913638
AL5G40930	AT3G59050	OG0001564	PAO3	protein_coding	polyamine oxidase 3	polyamine oxidase 3	polyamine oxidase 3 (PAO3)%3B CONTAINS InterPro DOMAIN/s: Amine oxidase (InterPro:IPR002937)%2C Flavin-containing amine oxidase (InterPro:IPR001613)%3B BEST Arabidopsis thaliana protein match is: polyamine oxidase 2 (TAIR:AT2G43020.1)%3B Has 6641 Blast hits to 6191 proteins in 1102 species: Archae - 131%3B Bacteria - 2618%3B Metazoa - 1408%3B Fungi - 589%3B Plants - 766%3B Viruses - 0%3B Other Eu…	Encodes a polyamine oxidase.	polyamine oxidase 3 (PAO3)%3B CONTAINS InterPro DOMAIN/s: Amine oxidase (InterPro:IPR002937)%2C Flavin-containing amine oxidase (InterPro:IPR001613)%3B BEST Arabidopsis thaliana protein match is: polyamine oxidase 2 (TAIR:AT2G43020.1)%3B Has 6641 Blast hits to 6191 proteins in 1102 species: Archae - 131%3B Bacteria - 2618%3B Metazoa - 1408%3B Fungi - 589%3B Plants - 766%3B Viruses - 0%3B Other Eu…	scaffold_5	19171702	19174805	3104	-	scaffold_5	19170109	19172098	1990	*	0.885800168	-0.04478389	213.0453199	0.897142857	5.481655704	0.012212842	8	-0.177142857	0.897142857	0	0.05010989	0.36	0.537142857	-2.452671681	-2.891322731	-2.146447256	-3.889237465	65	MODIFIER	NO	NO	NO	NO	A	B	-2.5325186144801	-2.5726650706807	0	-0.00826125459422843	-1.811950369428094
AL5G40930	AT3G59050	OG0001564	PAO3	protein_coding	polyamine oxidase 3	polyamine oxidase 3	polyamine oxidase 3 (PAO3)%3B CONTAINS InterPro DOMAIN/s: Amine oxidase (InterPro:IPR002937)%2C Flavin-containing amine oxidase (InterPro:IPR001613)%3B BEST Arabidopsis thaliana protein match is: polyamine oxidase 2 (TAIR:AT2G43020.1)%3B Has 6641 Blast hits to 6191 proteins in 1102 species: Archae - 131%3B Bacteria - 2618%3B Metazoa - 1408%3B Fungi - 589%3B Plants - 766%3B Viruses - 0%3B Other Eu…	Encodes a polyamine oxidase.	polyamine oxidase 3 (PAO3)%3B CONTAINS InterPro DOMAIN/s: Amine oxidase (InterPro:IPR002937)%2C Flavin-containing amine oxidase (InterPro:IPR001613)%3B BEST Arabidopsis thaliana protein match is: polyamine oxidase 2 (TAIR:AT2G43020.1)%3B Has 6641 Blast hits to 6191 proteins in 1102 species: Archae - 131%3B Bacteria - 2618%3B Metazoa - 1408%3B Fungi - 589%3B Plants - 766%3B Viruses - 0%3B Other Eu…	scaffold_5	19171702	19174805	3104	-	scaffold_5	19170109	19172098	1990	*	0.885800168	-0.04478389	213.0453199	0.897142857	5.481655704	0.012212842	8	-0.177142857	0.897142857	0	0.05010989	0.36	0.537142857	-2.452671681	-2.891322731	-2.146447256	-3.889237465	63	MODIFIER	NO	NO	NO	NO	A	B	-2.5325186144801	-2.5726650706807	0	-0.00826125459422843	-1.811950369428094
AL5G40930	AT3G59050	OG0001564	PAO3	protein_coding	polyamine oxidase 3	polyamine oxidase 3	polyamine oxidase 3 (PAO3)%3B CONTAINS InterPro DOMAIN/s: Amine oxidase (InterPro:IPR002937)%2C Flavin-containing amine oxidase (InterPro:IPR001613)%3B BEST Arabidopsis thaliana protein match is: polyamine oxidase 2 (TAIR:AT2G43020.1)%3B Has 6641 Blast hits to 6191 proteins in 1102 species: Archae - 131%3B Bacteria - 2618%3B Metazoa - 1408%3B Fungi - 589%3B Plants - 766%3B Viruses - 0%3B Other Eu…	Encodes a polyamine oxidase.	polyamine oxidase 3 (PAO3)%3B CONTAINS InterPro DOMAIN/s: Amine oxidase (InterPro:IPR002937)%2C Flavin-containing amine oxidase (InterPro:IPR001613)%3B BEST Arabidopsis thaliana protein match is: polyamine oxidase 2 (TAIR:AT2G43020.1)%3B Has 6641 Blast hits to 6191 proteins in 1102 species: Archae - 131%3B Bacteria - 2618%3B Metazoa - 1408%3B Fungi - 589%3B Plants - 766%3B Viruses - 0%3B Other Eu…	scaffold_5	19171702	19174805	3104	-	scaffold_5	19170109	19172098	1990	*	0.885800168	-0.04478389	213.0453199	0.897142857	5.481655704	0.012212842	8	-0.177142857	0.897142857	0	0.05010989	0.36	0.537142857	-2.452671681	-2.891322731	-2.146447256	-3.889237465	63	MODIFIER	NO	NO	NO	NO	A	B	-2.5325186144801	-2.5726650706807	0	-0.00826125459422843	-1.811950369428094
AL5G40930	AT3G59050	OG0001564	PAO3	protein_coding	polyamine oxidase 3	polyamine oxidase 3	polyamine oxidase 3 (PAO3)%3B CONTAINS InterPro DOMAIN/s: Amine oxidase (InterPro:IPR002937)%2C Flavin-containing amine oxidase (InterPro:IPR001613)%3B BEST Arabidopsis thaliana protein match is: polyamine oxidase 2 (TAIR:AT2G43020.1)%3B Has 6641 Blast hits to 6191 proteins in 1102 species: Archae - 131%3B Bacteria - 2618%3B Metazoa - 1408%3B Fungi - 589%3B Plants - 766%3B Viruses - 0%3B Other Eu…	Encodes a polyamine oxidase.	polyamine oxidase 3 (PAO3)%3B CONTAINS InterPro DOMAIN/s: Amine oxidase (InterPro:IPR002937)%2C Flavin-containing amine oxidase (InterPro:IPR001613)%3B BEST Arabidopsis thaliana protein match is: polyamine oxidase 2 (TAIR:AT2G43020.1)%3B Has 6641 Blast hits to 6191 proteins in 1102 species: Archae - 131%3B Bacteria - 2618%3B Metazoa - 1408%3B Fungi - 589%3B Plants - 766%3B Viruses - 0%3B Other Eu…	scaffold_5	19171702	19174805	3104	-	scaffold_5	19172946	19173419	474	*	0.801825126	-0.042772063	176.5091354	0.832857143	4.937495402	0.012212842	5.5434	0.440571429	0.829142857	0.016	0.087472527	0.672	0.231428571	-2.313448632	-2.482657732	-3.916073771	-1.190714964	123	MODIFIER	MODERATE	NO	NO	NO	A	B	-2.38876314694337	-2.43576150176138	-1.44740314330555	-1.25571069832284	-1.6681949018913638
AL5G40930	AT3G59050	OG0001564	PAO3	protein_coding	polyamine oxidase 3	polyamine oxidase 3	polyamine oxidase 3 (PAO3)%3B CONTAINS InterPro DOMAIN/s: Amine oxidase (InterPro:IPR002937)%2C Flavin-containing amine oxidase (InterPro:IPR001613)%3B BEST Arabidopsis thaliana protein match is: polyamine oxidase 2 (TAIR:AT2G43020.1)%3B Has 6641 Blast hits to 6191 proteins in 1102 species: Archae - 131%3B Bacteria - 2618%3B Metazoa - 1408%3B Fungi - 589%3B Plants - 766%3B Viruses - 0%3B Other Eu…	Encodes a polyamine oxidase.	polyamine oxidase 3 (PAO3)%3B CONTAINS InterPro DOMAIN/s: Amine oxidase (InterPro:IPR002937)%2C Flavin-containing amine oxidase (InterPro:IPR001613)%3B BEST Arabidopsis thaliana protein match is: polyamine oxidase 2 (TAIR:AT2G43020.1)%3B Has 6641 Blast hits to 6191 proteins in 1102 species: Archae - 131%3B Bacteria - 2618%3B Metazoa - 1408%3B Fungi - 589%3B Plants - 766%3B Viruses - 0%3B Other Eu…	scaffold_5	19171702	19174805	3104	-	scaffold_5	19170109	19172098	1990	*	0.885800168	-0.04478389	213.0453199	0.897142857	5.481655704	0.012212842	8	-0.177142857	0.897142857	0	0.05010989	0.36	0.537142857	-2.452671681	-2.891322731	-2.146447256	-3.889237465	65	MODIFIER	NO	NO	NO	NO	A	B	-2.5325186144801	-2.5726650706807	0	-0.00826125459422843	-1.811950369428094
AL5G40930	AT3G59050	OG0001564	PAO3	protein_coding	polyamine oxidase 3	polyamine oxidase 3	polyamine oxidase 3 (PAO3)%3B CONTAINS InterPro DOMAIN/s: Amine oxidase (InterPro:IPR002937)%2C Flavin-containing amine oxidase (InterPro:IPR001613)%3B BEST Arabidopsis thaliana protein match is: polyamine oxidase 2 (TAIR:AT2G43020.1)%3B Has 6641 Blast hits to 6191 proteins in 1102 species: Archae - 131%3B Bacteria - 2618%3B Metazoa - 1408%3B Fungi - 589%3B Plants - 766%3B Viruses - 0%3B Other Eu…	Encodes a polyamine oxidase.	polyamine oxidase 3 (PAO3)%3B CONTAINS InterPro DOMAIN/s: Amine oxidase (InterPro:IPR002937)%2C Flavin-containing amine oxidase (InterPro:IPR001613)%3B BEST Arabidopsis thaliana protein match is: polyamine oxidase 2 (TAIR:AT2G43020.1)%3B Has 6641 Blast hits to 6191 proteins in 1102 species: Archae - 131%3B Bacteria - 2618%3B Metazoa - 1408%3B Fungi - 589%3B Plants - 766%3B Viruses - 0%3B Other Eu…	scaffold_5	19171702	19174805	3104	-	scaffold_5	19172146	19172833	688	*	0.9339765	-0.036173432	221.2710613	0.94	5.827189524	0.012212842	2.1154	0.18	0.94	0	0.026813187	0.56	0.38	-2.452671681	-3.146137377	-3.338917953	-2.815005486	41	MODIFIER	MODERATE	NO	NO	NO	A	B	-2.38876314694337	-2.73999165491543	-1.44740314330555	-0.346972692957628	-1.6681949018913638
AL5G40930	AT3G59050	OG0001564	PAO3	protein_coding	polyamine oxidase 3	polyamine oxidase 3	polyamine oxidase 3 (PAO3)%3B CONTAINS InterPro DOMAIN/s: Amine oxidase (InterPro:IPR002937)%2C Flavin-containing amine oxidase (InterPro:IPR001613)%3B BEST Arabidopsis thaliana protein match is: polyamine oxidase 2 (TAIR:AT2G43020.1)%3B Has 6641 Blast hits to 6191 proteins in 1102 species: Archae - 131%3B Bacteria - 2618%3B Metazoa - 1408%3B Fungi - 589%3B Plants - 766%3B Viruses - 0%3B Other Eu…	Encodes a polyamine oxidase.	polyamine oxidase 3 (PAO3)%3B CONTAINS InterPro DOMAIN/s: Amine oxidase (InterPro:IPR002937)%2C Flavin-containing amine oxidase (InterPro:IPR001613)%3B BEST Arabidopsis thaliana protein match is: polyamine oxidase 2 (TAIR:AT2G43020.1)%3B Has 6641 Blast hits to 6191 proteins in 1102 species: Archae - 131%3B Bacteria - 2618%3B Metazoa - 1408%3B Fungi - 589%3B Plants - 766%3B Viruses - 0%3B Other Eu…	scaffold_5	19171702	19174805	3104	-	scaffold_5	19172146	19172833	688	*	0.9339765	-0.036173432	221.2710613	0.94	5.827189524	0.012212842	2.1154	0.18	0.94	0	0.026813187	0.56	0.38	-2.452671681	-3.146137377	-3.338917953	-2.815005486	39	MODIFIER	MODERATE	NO	NO	NO	A	B	-2.38876314694337	-2.73999165491543	-1.44740314330555	-0.346972692957628	-1.6681949018913638
AL5G40930	AT3G59050	OG0001564	PAO3	protein_coding	polyamine oxidase 3	polyamine oxidase 3	polyamine oxidase 3 (PAO3)%3B CONTAINS InterPro DOMAIN/s: Amine oxidase (InterPro:IPR002937)%2C Flavin-containing amine oxidase (InterPro:IPR001613)%3B BEST Arabidopsis thaliana protein match is: polyamine oxidase 2 (TAIR:AT2G43020.1)%3B Has 6641 Blast hits to 6191 proteins in 1102 species: Archae - 131%3B Bacteria - 2618%3B Metazoa - 1408%3B Fungi - 589%3B Plants - 766%3B Viruses - 0%3B Other Eu…	Encodes a polyamine oxidase.	polyamine oxidase 3 (PAO3)%3B CONTAINS InterPro DOMAIN/s: Amine oxidase (InterPro:IPR002937)%2C Flavin-containing amine oxidase (InterPro:IPR001613)%3B BEST Arabidopsis thaliana protein match is: polyamine oxidase 2 (TAIR:AT2G43020.1)%3B Has 6641 Blast hits to 6191 proteins in 1102 species: Archae - 131%3B Bacteria - 2618%3B Metazoa - 1408%3B Fungi - 589%3B Plants - 766%3B Viruses - 0%3B Other Eu…	scaffold_5	19171702	19174805	3104	-	scaffold_5	19170109	19172098	1990	*	0.885800168	-0.04478389	213.0453199	0.897142857	5.481655704	0.012212842	8	-0.177142857	0.897142857	0	0.05010989	0.36	0.537142857	-2.452671681	-2.891322731	-2.146447256	-3.889237465	67	MODIFIER	NO	NO	NO	NO	A	B	-2.5325186144801	-2.5726650706807	0	-0.00826125459422843	-1.811950369428094
AL5G40930	AT3G59050	OG0001564	PAO3	protein_coding	polyamine oxidase 3	polyamine oxidase 3	polyamine oxidase 3 (PAO3)%3B CONTAINS InterPro DOMAIN/s: Amine oxidase (InterPro:IPR002937)%2C Flavin-containing amine oxidase (InterPro:IPR001613)%3B BEST Arabidopsis thaliana protein match is: polyamine oxidase 2 (TAIR:AT2G43020.1)%3B Has 6641 Blast hits to 6191 proteins in 1102 species: Archae - 131%3B Bacteria - 2618%3B Metazoa - 1408%3B Fungi - 589%3B Plants - 766%3B Viruses - 0%3B Other Eu…	Encodes a polyamine oxidase.	polyamine oxidase 3 (PAO3)%3B CONTAINS InterPro DOMAIN/s: Amine oxidase (InterPro:IPR002937)%2C Flavin-containing amine oxidase (InterPro:IPR001613)%3B BEST Arabidopsis thaliana protein match is: polyamine oxidase 2 (TAIR:AT2G43020.1)%3B Has 6641 Blast hits to 6191 proteins in 1102 species: Archae - 131%3B Bacteria - 2618%3B Metazoa - 1408%3B Fungi - 589%3B Plants - 766%3B Viruses - 0%3B Other Eu…	scaffold_5	19171702	19174805	3104	-	scaffold_5	19172946	19173419	474	*	0.801825126	-0.042772063	176.5091354	0.832857143	4.937495402	0.012212842	5.5434	0.440571429	0.829142857	0.016	0.087472527	0.672	0.231428571	-2.313448632	-2.482657732	-3.916073771	-1.190714964	123	MODIFIER	MODERATE	NO	NO	NO	A	B	-2.38876314694337	-2.43576150176138	-1.44740314330555	-1.25571069832284	-1.6681949018913638
AL5G40930	AT3G59050	OG0001564	PAO3	protein_coding	polyamine oxidase 3	polyamine oxidase 3	polyamine oxidase 3 (PAO3)%3B CONTAINS InterPro DOMAIN/s: Amine oxidase (InterPro:IPR002937)%2C Flavin-containing amine oxidase (InterPro:IPR001613)%3B BEST Arabidopsis thaliana protein match is: polyamine oxidase 2 (TAIR:AT2G43020.1)%3B Has 6641 Blast hits to 6191 proteins in 1102 species: Archae - 131%3B Bacteria - 2618%3B Metazoa - 1408%3B Fungi - 589%3B Plants - 766%3B Viruses - 0%3B Other Eu…	Encodes a polyamine oxidase.	polyamine oxidase 3 (PAO3)%3B CONTAINS InterPro DOMAIN/s: Amine oxidase (InterPro:IPR002937)%2C Flavin-containing amine oxidase (InterPro:IPR001613)%3B BEST Arabidopsis thaliana protein match is: polyamine oxidase 2 (TAIR:AT2G43020.1)%3B Has 6641 Blast hits to 6191 proteins in 1102 species: Archae - 131%3B Bacteria - 2618%3B Metazoa - 1408%3B Fungi - 589%3B Plants - 766%3B Viruses - 0%3B Other Eu…	scaffold_5	19171702	19174805	3104	-	scaffold_5	19170109	19172098	1990	*	0.885800168	-0.04478389	213.0453199	0.897142857	5.481655704	0.012212842	8	-0.177142857	0.897142857	0	0.05010989	0.36	0.537142857	-2.452671681	-2.891322731	-2.146447256	-3.889237465	67	MODIFIER	NO	NO	NO	NO	A	B	-2.5325186144801	-2.5726650706807	0	-0.00826125459422843	-1.811950369428094
AL5G40930	AT3G59050	OG0001564	PAO3	protein_coding	polyamine oxidase 3	polyamine oxidase 3	polyamine oxidase 3 (PAO3)%3B CONTAINS InterPro DOMAIN/s: Amine oxidase (InterPro:IPR002937)%2C Flavin-containing amine oxidase (InterPro:IPR001613)%3B BEST Arabidopsis thaliana protein match is: polyamine oxidase 2 (TAIR:AT2G43020.1)%3B Has 6641 Blast hits to 6191 proteins in 1102 species: Archae - 131%3B Bacteria - 2618%3B Metazoa - 1408%3B Fungi - 589%3B Plants - 766%3B Viruses - 0%3B Other Eu…	Encodes a polyamine oxidase.	polyamine oxidase 3 (PAO3)%3B CONTAINS InterPro DOMAIN/s: Amine oxidase (InterPro:IPR002937)%2C Flavin-containing amine oxidase (InterPro:IPR001613)%3B BEST Arabidopsis thaliana protein match is: polyamine oxidase 2 (TAIR:AT2G43020.1)%3B Has 6641 Blast hits to 6191 proteins in 1102 species: Archae - 131%3B Bacteria - 2618%3B Metazoa - 1408%3B Fungi - 589%3B Plants - 766%3B Viruses - 0%3B Other Eu…	scaffold_5	19171702	19174805	3104	-	scaffold_5	19170109	19172098	1990	*	0.885800168	-0.04478389	213.0453199	0.897142857	5.481655704	0.012212842	8	-0.177142857	0.897142857	0	0.05010989	0.36	0.537142857	-2.452671681	-2.891322731	-2.146447256	-3.889237465	61	MODIFIER	NO	NO	NO	NO	A	B	-2.5325186144801	-2.5726650706807	0	-0.00826125459422843	-1.811950369428094
AL5G40930	AT3G59050	OG0001564	PAO3	protein_coding	polyamine oxidase 3	polyamine oxidase 3	polyamine oxidase 3 (PAO3)%3B CONTAINS InterPro DOMAIN/s: Amine oxidase (InterPro:IPR002937)%2C Flavin-containing amine oxidase (InterPro:IPR001613)%3B BEST Arabidopsis thaliana protein match is: polyamine oxidase 2 (TAIR:AT2G43020.1)%3B Has 6641 Blast hits to 6191 proteins in 1102 species: Archae - 131%3B Bacteria - 2618%3B Metazoa - 1408%3B Fungi - 589%3B Plants - 766%3B Viruses - 0%3B Other Eu…	Encodes a polyamine oxidase.	polyamine oxidase 3 (PAO3)%3B CONTAINS InterPro DOMAIN/s: Amine oxidase (InterPro:IPR002937)%2C Flavin-containing amine oxidase (InterPro:IPR001613)%3B BEST Arabidopsis thaliana protein match is: polyamine oxidase 2 (TAIR:AT2G43020.1)%3B Has 6641 Blast hits to 6191 proteins in 1102 species: Archae - 131%3B Bacteria - 2618%3B Metazoa - 1408%3B Fungi - 589%3B Plants - 766%3B Viruses - 0%3B Other Eu…	scaffold_5	19171702	19174805	3104	-	scaffold_5	19170109	19172098	1990	*	0.885800168	-0.04478389	213.0453199	0.897142857	5.481655704	0.012212842	8	-0.177142857	0.897142857	0	0.05010989	0.36	0.537142857	-2.452671681	-2.891322731	-2.146447256	-3.889237465	61	MODIFIER	NO	NO	NO	NO	A	B	-2.5325186144801	-2.5726650706807	0	-0.00826125459422843	-1.811950369428094
AL5G40930	AT3G59050	OG0001564	PAO3	protein_coding	polyamine oxidase 3	polyamine oxidase 3	polyamine oxidase 3 (PAO3)%3B CONTAINS InterPro DOMAIN/s: Amine oxidase (InterPro:IPR002937)%2C Flavin-containing amine oxidase (InterPro:IPR001613)%3B BEST Arabidopsis thaliana protein match is: polyamine oxidase 2 (TAIR:AT2G43020.1)%3B Has 6641 Blast hits to 6191 proteins in 1102 species: Archae - 131%3B Bacteria - 2618%3B Metazoa - 1408%3B Fungi - 589%3B Plants - 766%3B Viruses - 0%3B Other Eu…	Encodes a polyamine oxidase.	polyamine oxidase 3 (PAO3)%3B CONTAINS InterPro DOMAIN/s: Amine oxidase (InterPro:IPR002937)%2C Flavin-containing amine oxidase (InterPro:IPR001613)%3B BEST Arabidopsis thaliana protein match is: polyamine oxidase 2 (TAIR:AT2G43020.1)%3B Has 6641 Blast hits to 6191 proteins in 1102 species: Archae - 131%3B Bacteria - 2618%3B Metazoa - 1408%3B Fungi - 589%3B Plants - 766%3B Viruses - 0%3B Other Eu…	scaffold_5	19171702	19174805	3104	-	scaffold_5	19172146	19172833	688	*	0.9339765	-0.036173432	221.2710613	0.94	5.827189524	0.012212842	2.1154	0.18	0.94	0	0.026813187	0.56	0.38	-2.452671681	-3.146137377	-3.338917953	-2.815005486	41	MODIFIER	MODERATE	NO	NO	NO	A	B	-2.38876314694337	-2.73999165491543	-1.44740314330555	-0.346972692957628	-1.6681949018913638
AL6G13420	AT3G10090	OG0000255	.	protein_coding	Nucleic acid-binding%2C OB-fold-like protein	.	Nucleic acid-binding%2C OB-fold-like protein%3B FUNCTIONS IN: structural constituent of ribosome%3B INVOLVED IN: translation%2C ribosome biogenesis%3B LOCATED IN: cytosolic small ribosomal subunit%2C cytosolic ribosome%2C ribosome%2C cell wall%3B EXPRESSED IN: 22 plant structures%3B EXPRESSED DURING: 13 growth stages%3B CONTAINS InterPro DOMAIN/s: Nucleic acid-binding%2C OB-fold-like (InterPro:IP…	.	Nucleic acid-binding%2C OB-fold-like protein%3B FUNCTIONS IN: structural constituent of ribosome%3B INVOLVED IN: translation%2C ribosome biogenesis%3B LOCATED IN: cytosolic small ribosomal subunit%2C cytosolic ribosome%2C ribosome%2C cell wall%3B EXPRESSED IN: 22 plant structures%3B EXPRESSED DURING: 13 growth stages%3B CONTAINS InterPro DOMAIN/s: Nucleic acid-binding%2C OB-fold-like (InterPro:IP…	scaffold_6	1218370	1219241	872	-	scaffold_6	1218952	1219972	1021	*	0.835729746	-0.047080012	221.4063586	0.885714286	4.607523434	0.026076418	7.9949	-0.234285714	0.885714286	0	0.167032967	0.36	0.594285714	-2.452671681	-1.612441675	-2.146447256	-3.481547015	75	MODIFIER	NO	NO	NO	NO	B	B	-2.25446527595511	-0.58502807007428	0.0782951992723763	-1.51180959074394	-1.533897030903104
AL6G13420	AT3G10090	OG0000255	.	protein_coding	Nucleic acid-binding%2C OB-fold-like protein	.	Nucleic acid-binding%2C OB-fold-like protein%3B FUNCTIONS IN: structural constituent of ribosome%3B INVOLVED IN: translation%2C ribosome biogenesis%3B LOCATED IN: cytosolic small ribosomal subunit%2C cytosolic ribosome%2C ribosome%2C cell wall%3B EXPRESSED IN: 22 plant structures%3B EXPRESSED DURING: 13 growth stages%3B CONTAINS InterPro DOMAIN/s: Nucleic acid-binding%2C OB-fold-like (InterPro:IP…	.	Nucleic acid-binding%2C OB-fold-like protein%3B FUNCTIONS IN: structural constituent of ribosome%3B INVOLVED IN: translation%2C ribosome biogenesis%3B LOCATED IN: cytosolic small ribosomal subunit%2C cytosolic ribosome%2C ribosome%2C cell wall%3B EXPRESSED IN: 22 plant structures%3B EXPRESSED DURING: 13 growth stages%3B CONTAINS InterPro DOMAIN/s: Nucleic acid-binding%2C OB-fold-like (InterPro:IP…	scaffold_6	1218370	1219241	872	-	scaffold_6	1218952	1219972	1021	*	0.835729746	-0.047080012	221.4063586	0.885714286	4.607523434	0.026076418	7.9949	-0.234285714	0.885714286	0	0.167032967	0.36	0.594285714	-2.452671681	-1.612441675	-2.146447256	-3.481547015	93	MODIFIER	NO	NO	NO	NO	B	B	-2.25446527595511	-0.58502807007428	0.0782951992723763	-1.51180959074394	-1.533897030903104
AL6G13420	AT3G10090	OG0000255	.	protein_coding	Nucleic acid-binding%2C OB-fold-like protein	.	Nucleic acid-binding%2C OB-fold-like protein%3B FUNCTIONS IN: structural constituent of ribosome%3B INVOLVED IN: translation%2C ribosome biogenesis%3B LOCATED IN: cytosolic small ribosomal subunit%2C cytosolic ribosome%2C ribosome%2C cell wall%3B EXPRESSED IN: 22 plant structures%3B EXPRESSED DURING: 13 growth stages%3B CONTAINS InterPro DOMAIN/s: Nucleic acid-binding%2C OB-fold-like (InterPro:IP…	.	Nucleic acid-binding%2C OB-fold-like protein%3B FUNCTIONS IN: structural constituent of ribosome%3B INVOLVED IN: translation%2C ribosome biogenesis%3B LOCATED IN: cytosolic small ribosomal subunit%2C cytosolic ribosome%2C ribosome%2C cell wall%3B EXPRESSED IN: 22 plant structures%3B EXPRESSED DURING: 13 growth stages%3B CONTAINS InterPro DOMAIN/s: Nucleic acid-binding%2C OB-fold-like (InterPro:IP…	scaffold_6	1218370	1219241	872	-	scaffold_6	1218952	1219972	1021	*	0.835729746	-0.047080012	221.4063586	0.885714286	4.607523434	0.026076418	7.9949	-0.234285714	0.885714286	0	0.167032967	0.36	0.594285714	-2.452671681	-1.612441675	-2.146447256	-3.481547015	75	MODIFIER	NO	NO	NO	NO	B	B	-2.25446527595511	-0.58502807007428	0.0782951992723763	-1.51180959074394	-1.533897030903104
[truncated: 144 more rows]
[truncated: 35 more columns]

## Sheet: High_effect_SNPs
Gene_description															High_effect_SNPs									Metal_homeostasis_gene_list													Number_of_copies
AL_ID	AT_ID	OrthoGroup	symbol	locus_type	note	full_name	description	curator_summary	computational_description	Scaffold	Gene_start	Gene_end	Gene_size	Gene_strand	Scaffold	Position	Base	Characterization	Effect	Allele_Frequency_Klet	Allele_Frequency_Kowa	Allele_Frequency_Klet-Allele_Frequency_Kowa	UnifiedGenotyper_Allele_Frequency_difference	ID	Name	Function	Localisation	EC.TC	Comment	BINCODE	BIN	EvidenceCode	Annotator...Curator	metal.1	metal.2	metal.3	Thaliana_paralogue_number	Halleri_paralogue_number	Lyrata_paralogue_number
[truncated: 1,638 more rows]

## Sheet: Indels
Gene_description										Indel_HaplotypeCaller									Indels_GROM												Metal_homeostasis_gene_list
[truncated: 1,170 more rows]
