# Supplementary material for: Convergent evolution in Arabidopsis halleri and Arabidopsis arenosa on calamine metalliferous soils
Source: Philos Trans R Soc Lond B Biol Sci. 2019 Jun 3;374(1777):20180243. doi: 10.1098/rstb.2018.0243 (PMC6560266; doi:10.1098/rstb.2018.0243)
Supplement: Dataset S4 [file rstb20180243supp15.xlsx]

## Sheet: Classical_genome_scans
Dataset S4. Candidate genes Mias vs. Zapa in Arabidopsis arenosa. Gene_description															Genome_scans
AL_ID	AT_ID	OrthoGroup	symbol	locus_type	note	full_name	description	curator_summary	computational_description	Scaffold	Gene_start	Gene_end	Gene_size	Gene_strand	Scaffold	Window_start	Window_end	Window_width	Window_strand	Fst	DD	Nielsen	Dxy	Flk	Flk_pvalue	VarLD	Allele_Frequency_Difference	Absolute_Allele_Frequency_Difference	Pi_Mias	Pi_Zapa	Allele_Frequency_Mias	Allele_Frequency_Zapa	MODIFIER_effect_SNP_in_window	MODERATE_effect_SNP_in_window	HIGH_effect_SNP_in_window	Allele_Frequency_HIGH_effect_SNP_in_gene_Mias	Allele_Frequency_HIGH_effect_SNP_in_gene_Zapa	Allele_Frequency_Plot	Metrics_Plot	TajimasD_Mias_nearest_window	TajimasD_Zapa_nearest_window	FayandWusH_Mias_nearest_window	FayandWusH_Zapa_nearest_window	TajimasD_Mias_nearest_window_standardized	TajimasD_Zapa_nearest_window_standardized	FayandWusH_Mias_nearest_window_standardized	FayandWusH_Zapa_nearest_window_standardized	TajimasD_difference_nearest_windows_Mias-Zapa	FayandWusH_difference_nearest_windows_Mias-Zapa
AL1G10380	AT1G01940	OG0004766	.	protein_coding	Cyclophilin-like peptidyl-prolyl cis-trans isomerase family protein	.	Cyclophilin-like peptidyl-prolyl cis-trans isomerase family protein%3B FUNCTIONS IN: peptidyl-prolyl cis-trans isomerase activity%3B INVOLVED IN: protein folding%3B LOCATED IN: cellular_component unknown%3B EXPRESSED IN: 23 plant structures%3B EXPRESSED DURING: 13 growth stages%3B CONTAINS InterPro DOMAIN/s: Cyclophilin-like (InterPro:IPR015891)%2C Peptidyl-prolyl cis-trans isomerase%2C cyclophil…	.	Cyclophilin-like peptidyl-prolyl cis-trans isomerase family protein%3B FUNCTIONS IN: peptidyl-prolyl cis-trans isomerase activity%3B INVOLVED IN: protein folding%3B LOCATED IN: cellular_component unknown%3B EXPRESSED IN: 23 plant structures%3B EXPRESSED DURING: 13 growth stages%3B CONTAINS InterPro DOMAIN/s: Cyclophilin-like (InterPro:IPR015891)%2C Peptidyl-prolyl cis-trans isomerase%2C cyclophil…	scaffold_1	140441	142251	1811	-	scaffold_1	141074	141357	284	*	0.142255726917981	-0.00233803150022396	260.623282074156	0.405803571428571	1.74765819922146	0.0131928479235	9.2497	0.2278571	0.29428571	0.281904762	0.322096774	0.522857143	0.295	NO	NO	NO	NO	NO	C	B	-0.451489030822503	0.185188472045454	-2.10526786610102	0.357910306913096	1.31985219861298	1.91857965539376	-2.0614599438907	0.336529439943589	-0.636677502867957	-2.46317817301412
AL1G11480	AT1G01040	OG0004826	DCL1	protein_coding	dicer-like 1	dicer-like 1	dicer-like 1 (DCL1)%3B CONTAINS InterPro DOMAIN/s: Restriction endonuclease%2C type I%2C R subunit/Type III%2C Res subunit (InterPro:IPR006935)%2C Double-stranded R-binding (InterPro:IPR001159)%2C Argonaute/Dicer protein%2C PAZ (InterPro:IPR003100)%2C Ribonuclease III (InterPro:IPR000999)%2C Double-stranded R-binding-like (InterPro:IPR014720)%2C DEAD-like helicase%2C N-terminal (InterPro:IPR01400…	Encodes a Dicer homolog. Dicer is a R helicase involved in microR processing. Mutations in this locus can result in embryo lethality. Embryo shape at seed maturity is globular-elongate. Other mutants convert the floral meristems to an indeterminate state%2C others yet show defects in ovule development. mR is expressed in all shoot tissues. DCL1 is able to produce miRs and siRs.	dicer-like 1 (DCL1)%3B CONTAINS InterPro DOMAIN/s: Restriction endonuclease%2C type I%2C R subunit/Type III%2C Res subunit (InterPro:IPR006935)%2C Double-stranded R-binding (InterPro:IPR001159)%2C Argonaute/Dicer protein%2C PAZ (InterPro:IPR003100)%2C Ribonuclease III (InterPro:IPR000999)%2C Double-stranded R-binding-like (InterPro:IPR014720)%2C DEAD-like helicase%2C N-terminal (InterPro:IPR01400…	scaffold_1	511167	519245	8079	-	scaffold_1	515852	516201	350	*	0.136833079363942	-0.125494137779355	270.701505213749	0.36125	2.25829120245556	0.0250464557261	4.664	0.175	0.28607143	0.130793651	0.412580645	0.58	0.405	NO	MODERATE	NO	0.142857142857143	0	C	A	-2.12489438902934	2.43054197207234	-5.3489864930031	-0.0818477058444662	-0.353553159593854	4.16393315542065	-5.30517857079278	-0.103228572813973	-4.55543636110168	-5.26713878715863
AL1G20780	AT1G10090	OG0006867	.	protein_coding	Early-responsive to dehydration stress protein (ERD4)	.	Early-responsive to dehydration stress protein (ERD4)%3B FUNCTIONS IN: molecular_function unknown%3B INVOLVED IN: biological_process unknown%3B LOCATED IN: endomembrane system%2C membrane%3B EXPRESSED IN: 24 plant structures%3B EXPRESSED DURING: 14 growth stages%3B CONTAINS InterPro DOMAIN/s: Protein of unknown function DUF221 (InterPro:IPR003864)%3B BEST Arabidopsis thaliana protein match is: li…	.	Early-responsive to dehydration stress protein (ERD4)%3B FUNCTIONS IN: molecular_function unknown%3B INVOLVED IN: biological_process unknown%3B LOCATED IN: endomembrane system%2C membrane%3B EXPRESSED IN: 24 plant structures%3B EXPRESSED DURING: 14 growth stages%3B CONTAINS InterPro DOMAIN/s: Protein of unknown function DUF221 (InterPro:IPR003864)%3B BEST Arabidopsis thaliana protein match is: li…	scaffold_1	3886023	3891719	5697	-	scaffold_1	3888829	3889304	476	*	0.0946283856722239	0.0668090814672779	273.919712814499	0.459821428571429	0.90735219085448	0.15261522991	11.1837	0.1808929	0.28660714	0.358941799	0.401854839	0.537142857	0.35625	NO	NO	NO	NO	NO	C	B	1.60186826861972	2.3853638332388	-2.79810097087622	0.586806433427279	3.37320949805521	4.11875501658711	-2.7542930486659	0.565425566457772	-0.78349556461908	-3.3849074043035
AL1G28400	AT1G16280	OG0009507	RH36	protein_coding	R helicase 36	R helicase 36	R helicase 36 (RH36)%3B FUNCTIONS IN: helicase activity%2C ATP binding%2C ATP-dependent helicase activity%2C nucleic acid binding%3B INVOLVED IN: post-embryonic development%2C embryo sac development%2C rR processing%3B LOCATED IN: nucleus%3B EXPRESSED IN: 30 plant structures%3B EXPRESSED DURING: 13 growth stages%3B CONTAINS InterPro DOMAIN/s: R helicase%2C DEAD-box type%2C Q motif (InterPro:IPR01…	Encodes a putative DEAD-box R helicase. Essential for female gametogenesis.	R helicase 36 (RH36)%3B FUNCTIONS IN: helicase activity%2C ATP binding%2C ATP-dependent helicase activity%2C nucleic acid binding%3B INVOLVED IN: post-embryonic development%2C embryo sac development%2C rR processing%3B LOCATED IN: nucleus%3B EXPRESSED IN: 30 plant structures%3B EXPRESSED DURING: 13 growth stages%3B CONTAINS InterPro DOMAIN/s: R helicase%2C DEAD-box type%2C Q motif (InterPro:IPR01…	scaffold_1	6830656	6832931	2276	-	scaffold_1	6831024	6831341	318	*	0.223168286084293	-0.166946780594696	245.223552485331	0.402767857142857	3.794132540263	0.00363017495194	14.4461	-0.1183929	0.36089286	0.129206349	0.31766129	0.292857143	0.41125	NO	NO	NO	NO	NO	B	B	-1.17501453594092	1.49384856025696	-0.508602483732711	0.0319067327868275	0.596326693494566	3.22723974360527	-0.464794561522389	0.0105258658173206	-2.66886309619788	-0.540509216519539
AL1G28400	AT1G16280	OG0009507	RH36	protein_coding	R helicase 36	R helicase 36	R helicase 36 (RH36)%3B FUNCTIONS IN: helicase activity%2C ATP binding%2C ATP-dependent helicase activity%2C nucleic acid binding%3B INVOLVED IN: post-embryonic development%2C embryo sac development%2C rR processing%3B LOCATED IN: nucleus%3B EXPRESSED IN: 30 plant structures%3B EXPRESSED DURING: 13 growth stages%3B CONTAINS InterPro DOMAIN/s: R helicase%2C DEAD-box type%2C Q motif (InterPro:IPR01…	Encodes a putative DEAD-box R helicase. Essential for female gametogenesis.	R helicase 36 (RH36)%3B FUNCTIONS IN: helicase activity%2C ATP binding%2C ATP-dependent helicase activity%2C nucleic acid binding%3B INVOLVED IN: post-embryonic development%2C embryo sac development%2C rR processing%3B LOCATED IN: nucleus%3B EXPRESSED IN: 30 plant structures%3B EXPRESSED DURING: 13 growth stages%3B CONTAINS InterPro DOMAIN/s: R helicase%2C DEAD-box type%2C Q motif (InterPro:IPR01…	scaffold_1	6830656	6832931	2276	-	scaffold_1	6831024	6831341	318	*	0.223168286084293	-0.166946780594696	245.223552485331	0.402767857142857	3.794132540263	0.00363017495194	14.4461	-0.1183929	0.36089286	0.129206349	0.31766129	0.292857143	0.41125	NO	MODERATE	NO	NO	NO	B	B	-1.17501453594092	1.49384856025696	-0.508602483732711	0.0319067327868275	0.596326693494566	3.22723974360527	-0.464794561522389	0.0105258658173206	-2.66886309619788	-0.540509216519539
AL1G28400	AT1G16280	OG0009507	RH36	protein_coding	R helicase 36	R helicase 36	R helicase 36 (RH36)%3B FUNCTIONS IN: helicase activity%2C ATP binding%2C ATP-dependent helicase activity%2C nucleic acid binding%3B INVOLVED IN: post-embryonic development%2C embryo sac development%2C rR processing%3B LOCATED IN: nucleus%3B EXPRESSED IN: 30 plant structures%3B EXPRESSED DURING: 13 growth stages%3B CONTAINS InterPro DOMAIN/s: R helicase%2C DEAD-box type%2C Q motif (InterPro:IPR01…	Encodes a putative DEAD-box R helicase. Essential for female gametogenesis.	R helicase 36 (RH36)%3B FUNCTIONS IN: helicase activity%2C ATP binding%2C ATP-dependent helicase activity%2C nucleic acid binding%3B INVOLVED IN: post-embryonic development%2C embryo sac development%2C rR processing%3B LOCATED IN: nucleus%3B EXPRESSED IN: 30 plant structures%3B EXPRESSED DURING: 13 growth stages%3B CONTAINS InterPro DOMAIN/s: R helicase%2C DEAD-box type%2C Q motif (InterPro:IPR01…	scaffold_1	6830656	6832931	2276	-	scaffold_1	6831024	6831341	318	*	0.223168286084293	-0.166946780594696	245.223552485331	0.402767857142857	3.794132540263	0.00363017495194	14.4461	-0.1183929	0.36089286	0.129206349	0.31766129	0.292857143	0.41125	NO	NO	NO	NO	NO	B	B	-1.17501453594092	1.49384856025696	-0.508602483732711	0.0319067327868275	0.596326693494566	3.22723974360527	-0.464794561522389	0.0105258658173206	-2.66886309619788	-0.540509216519539
AL1G28400	AT1G16280	OG0009507	RH36	protein_coding	R helicase 36	R helicase 36	R helicase 36 (RH36)%3B FUNCTIONS IN: helicase activity%2C ATP binding%2C ATP-dependent helicase activity%2C nucleic acid binding%3B INVOLVED IN: post-embryonic development%2C embryo sac development%2C rR processing%3B LOCATED IN: nucleus%3B EXPRESSED IN: 30 plant structures%3B EXPRESSED DURING: 13 growth stages%3B CONTAINS InterPro DOMAIN/s: R helicase%2C DEAD-box type%2C Q motif (InterPro:IPR01…	Encodes a putative DEAD-box R helicase. Essential for female gametogenesis.	R helicase 36 (RH36)%3B FUNCTIONS IN: helicase activity%2C ATP binding%2C ATP-dependent helicase activity%2C nucleic acid binding%3B INVOLVED IN: post-embryonic development%2C embryo sac development%2C rR processing%3B LOCATED IN: nucleus%3B EXPRESSED IN: 30 plant structures%3B EXPRESSED DURING: 13 growth stages%3B CONTAINS InterPro DOMAIN/s: R helicase%2C DEAD-box type%2C Q motif (InterPro:IPR01…	scaffold_1	6830656	6832931	2276	-	scaffold_1	6831024	6831341	318	*	0.223168286084293	-0.166946780594696	245.223552485331	0.402767857142857	3.794132540263	0.00363017495194	14.4461	-0.1183929	0.36089286	0.129206349	0.31766129	0.292857143	0.41125	NO	NO	NO	NO	NO	B	B	-1.17501453594092	1.49384856025696	-0.508602483732711	0.0319067327868275	0.596326693494566	3.22723974360527	-0.464794561522389	0.0105258658173206	-2.66886309619788	-0.540509216519539
AL1G32180	AT1G19430	OG0011883	.	protein_coding	S-adenosyl-L-methionine-dependent methyltransferases superfamily protein	.	S-adenosyl-L-methionine-dependent methyltransferases superfamily protein%3B CONTAINS InterPro DOMAIN/s: Protein of unknown function DUF248%2C methyltransferase putative (InterPro:IPR004159)%3B BEST Arabidopsis thaliana protein match is: S-adenosyl-L-methionine-dependent methyltransferases superfamily protein (TAIR:AT5G64030.1)%3B Has 8058 Blast hits to 6201 proteins in 616 species: Archae - 19%3B…	.	S-adenosyl-L-methionine-dependent methyltransferases superfamily protein%3B CONTAINS InterPro DOMAIN/s: Protein of unknown function DUF248%2C methyltransferase putative (InterPro:IPR004159)%3B BEST Arabidopsis thaliana protein match is: S-adenosyl-L-methionine-dependent methyltransferases superfamily protein (TAIR:AT5G64030.1)%3B Has 8058 Blast hits to 6201 proteins in 616 species: Archae - 19%3B…	scaffold_1	8271822	8275138	3317	-	scaffold_1	8272528	8272839	312	*	0.127532702647528	-0.140730889206166	225.813619038796	0.291875	2.50692573224748	0.0073230566833	10.0478	0.1658929	0.24267857	0.085185185	0.345080645	0.527142857	0.36125	NO	MODERATE	NO	0.142857142857143	0	C	A	-3.21624570959902	1.03152560619375	-5.67020911430797	-0.726918607838991	-1.44490448016353	2.76491678954206	-5.62640119209765	-0.748299474808498	-4.24777131579277	-4.94329050646898
AL1G42580	AT1G28960	OG0011421	NUDX15	protein_coding	nudix hydrolase homolog 15	nudix hydrolase homolog 15	nudix hydrolase homolog 15 (NUDX15)%3B CONTAINS InterPro DOMAIN/s: NUDIX hydrolase domain-like (InterPro:IPR015797)%2C NUDIX hydrolase domain (InterPro:IPR000086)%2C NUDIX hydrolase%2C AtNUDT22 (InterPro:IPR017397)%3B BEST Arabidopsis thaliana protein match is: nudix hydrolase homolog 22 (TAIR:AT2G33980.1)%3B Has 3635 Blast hits to 3634 proteins in 1300 species: Archae - 59%3B Bacteria - 2277%3B …	Encodes a ppGpp pyrophosphohydrolase.	nudix hydrolase homolog 15 (NUDX15)%3B CONTAINS InterPro DOMAIN/s: NUDIX hydrolase domain-like (InterPro:IPR015797)%2C NUDIX hydrolase domain (InterPro:IPR000086)%2C NUDIX hydrolase%2C AtNUDT22 (InterPro:IPR017397)%3B BEST Arabidopsis thaliana protein match is: nudix hydrolase homolog 22 (TAIR:AT2G33980.1)%3B Has 3635 Blast hits to 3634 proteins in 1300 species: Archae - 59%3B Bacteria - 2277%3B …	scaffold_1	12718555	12726816	8262	-	scaffold_1	12725732	12725907	176	*	0.270398527690706	-0.121392615070684	223.475649422383	0.396339285714286	4.643068803454	8.56148212078E-5	19.6952	-0.1448214	0.38089286	0.195873016	0.143790323	0.201428571	0.34625	NO	NO	NO	0	0.03125	C	B	-1.70856407044164	-0.918664053454026	0.266110897061387	-2.90073818509796	0.0627771589938464	0.81472712989428	0.309918819271709	-2.92211905206747	-0.789900016987614	3.16684908215935
AL1G42580	AT1G28960	OG0011421	NUDX15	protein_coding	nudix hydrolase homolog 15	nudix hydrolase homolog 15	nudix hydrolase homolog 15 (NUDX15)%3B CONTAINS InterPro DOMAIN/s: NUDIX hydrolase domain-like (InterPro:IPR015797)%2C NUDIX hydrolase domain (InterPro:IPR000086)%2C NUDIX hydrolase%2C AtNUDT22 (InterPro:IPR017397)%3B BEST Arabidopsis thaliana protein match is: nudix hydrolase homolog 22 (TAIR:AT2G33980.1)%3B Has 3635 Blast hits to 3634 proteins in 1300 species: Archae - 59%3B Bacteria - 2277%3B …	Encodes a ppGpp pyrophosphohydrolase.	nudix hydrolase homolog 15 (NUDX15)%3B CONTAINS InterPro DOMAIN/s: NUDIX hydrolase domain-like (InterPro:IPR015797)%2C NUDIX hydrolase domain (InterPro:IPR000086)%2C NUDIX hydrolase%2C AtNUDT22 (InterPro:IPR017397)%3B BEST Arabidopsis thaliana protein match is: nudix hydrolase homolog 22 (TAIR:AT2G33980.1)%3B Has 3635 Blast hits to 3634 proteins in 1300 species: Archae - 59%3B Bacteria - 2277%3B …	scaffold_1	12718555	12726816	8262	-	scaffold_1	12725732	12725907	176	*	0.270398527690706	-0.121392615070684	223.475649422383	0.396339285714286	4.643068803454	8.56148212078E-5	19.6952	-0.1448214	0.38089286	0.195873016	0.143790323	0.201428571	0.34625	NO	NO	NO	0	0.03125	C	B	-1.70856407044164	-0.918664053454026	0.266110897061387	-2.90073818509796	0.0627771589938464	0.81472712989428	0.309918819271709	-2.92211905206747	-0.789900016987614	3.16684908215935
AL1G43660	AT1G29830	OG0003448	.	protein_coding	Magnesium transporter CorA-like family protein	.	Magnesium transporter CorA-like family protein%3B FUNCTIONS IN: metal ion transmembrane transporter activity%3B INVOLVED IN: metal ion transport%2C transmembrane transport%3B LOCATED IN: membrane%3B CONTAINS InterPro DOMAIN/s: Mg2+ transporter protein%2C CorA-like (InterPro:IPR002523)%3B BEST Arabidopsis thaliana protein match is: Magnesium transporter CorA-like family protein (TAIR:AT1G29820.2)%…	.	Magnesium transporter CorA-like family protein%3B FUNCTIONS IN: metal ion transmembrane transporter activity%3B INVOLVED IN: metal ion transport%2C transmembrane transport%3B LOCATED IN: membrane%3B CONTAINS InterPro DOMAIN/s: Mg2+ transporter protein%2C CorA-like (InterPro:IPR002523)%3B BEST Arabidopsis thaliana protein match is: Magnesium transporter CorA-like family protein (TAIR:AT1G29820.2)%…	scaffold_1	13139916	13143140	3225	+	scaffold_1	13141492	13141788	297	*	0.0703513292882163	0.155223545097008	240.777612066434	0.393571428571429	0.90394269520072	0.0437012438436	4.1016	0.2021429	0.205	0.411851852	0.291935484	0.437142857	0.235	NO	MODERATE	NO	NO	NO	C	B	2.58206343616841	0.704737068631147	-0.11652193125765	1.56897890356087	4.3534046656039	2.43812825197945	-0.0727140090473283	1.54759803659136	1.87732636753726	-1.68550083481852
AL1G43660	AT1G29830	OG0003448	.	protein_coding	Magnesium transporter CorA-like family protein	.	Magnesium transporter CorA-like family protein%3B FUNCTIONS IN: metal ion transmembrane transporter activity%3B INVOLVED IN: metal ion transport%2C transmembrane transport%3B LOCATED IN: membrane%3B CONTAINS InterPro DOMAIN/s: Mg2+ transporter protein%2C CorA-like (InterPro:IPR002523)%3B BEST Arabidopsis thaliana protein match is: Magnesium transporter CorA-like family protein (TAIR:AT1G29820.2)%…	.	Magnesium transporter CorA-like family protein%3B FUNCTIONS IN: metal ion transmembrane transporter activity%3B INVOLVED IN: metal ion transport%2C transmembrane transport%3B LOCATED IN: membrane%3B CONTAINS InterPro DOMAIN/s: Mg2+ transporter protein%2C CorA-like (InterPro:IPR002523)%3B BEST Arabidopsis thaliana protein match is: Magnesium transporter CorA-like family protein (TAIR:AT1G29820.2)%…	scaffold_1	13139916	13143140	3225	+	scaffold_1	13141492	13141788	297	*	0.0703513292882163	0.155223545097008	240.777612066434	0.393571428571429	0.90394269520072	0.0437012438436	4.1016	0.2021429	0.205	0.411851852	0.291935484	0.437142857	0.235	NO	MODERATE	NO	NO	NO	C	B	2.58206343616841	0.704737068631147	-0.11652193125765	1.56897890356087	4.3534046656039	2.43812825197945	-0.0727140090473283	1.54759803659136	1.87732636753726	-1.68550083481852
AL1G43660	AT1G29820	OG0003448	.	protein_coding	Magnesium transporter CorA-like family protein	.	Magnesium transporter CorA-like family protein%3B FUNCTIONS IN: metal ion transmembrane transporter activity%3B INVOLVED IN: transmembrane transport%2C metal ion transport%3B LOCATED IN: membrane%3B EXPRESSED IN: 21 plant structures%3B EXPRESSED DURING: 13 growth stages%3B CONTAINS InterPro DOMAIN/s: Mg2+ transporter protein%2C CorA-like (InterPro:IPR002523)%3B BEST Arabidopsis thaliana protein m…	.	Magnesium transporter CorA-like family protein%3B FUNCTIONS IN: metal ion transmembrane transporter activity%3B INVOLVED IN: transmembrane transport%2C metal ion transport%3B LOCATED IN: membrane%3B EXPRESSED IN: 21 plant structures%3B EXPRESSED DURING: 13 growth stages%3B CONTAINS InterPro DOMAIN/s: Mg2+ transporter protein%2C CorA-like (InterPro:IPR002523)%3B BEST Arabidopsis thaliana protein m…	scaffold_1	13139916	13143140	3225	+	scaffold_1	13141492	13141788	297	*	0.0703513292882163	0.155223545097008	240.777612066434	0.393571428571429	0.90394269520072	0.0437012438436	4.1016	0.2021429	0.205	0.411851852	0.291935484	0.437142857	0.235	NO	MODERATE	NO	NO	NO	C	B	2.58206343616841	0.704737068631147	-0.11652193125765	1.56897890356087	4.3534046656039	2.43812825197945	-0.0727140090473283	1.54759803659136	1.87732636753726	-1.68550083481852
AL1G43660	AT1G29820	OG0003448	.	protein_coding	Magnesium transporter CorA-like family protein	.	Magnesium transporter CorA-like family protein%3B FUNCTIONS IN: metal ion transmembrane transporter activity%3B INVOLVED IN: transmembrane transport%2C metal ion transport%3B LOCATED IN: membrane%3B EXPRESSED IN: 21 plant structures%3B EXPRESSED DURING: 13 growth stages%3B CONTAINS InterPro DOMAIN/s: Mg2+ transporter protein%2C CorA-like (InterPro:IPR002523)%3B BEST Arabidopsis thaliana protein m…	.	Magnesium transporter CorA-like family protein%3B FUNCTIONS IN: metal ion transmembrane transporter activity%3B INVOLVED IN: transmembrane transport%2C metal ion transport%3B LOCATED IN: membrane%3B EXPRESSED IN: 21 plant structures%3B EXPRESSED DURING: 13 growth stages%3B CONTAINS InterPro DOMAIN/s: Mg2+ transporter protein%2C CorA-like (InterPro:IPR002523)%3B BEST Arabidopsis thaliana protein m…	scaffold_1	13139916	13143140	3225	+	scaffold_1	13141492	13141788	297	*	0.0703513292882163	0.155223545097008	240.777612066434	0.393571428571429	0.90394269520072	0.0437012438436	4.1016	0.2021429	0.205	0.411851852	0.291935484	0.437142857	0.235	NO	MODERATE	NO	NO	NO	C	B	2.58206343616841	0.704737068631147	-0.11652193125765	1.56897890356087	4.3534046656039	2.43812825197945	-0.0727140090473283	1.54759803659136	1.87732636753726	-1.68550083481852
AL1G43730	AT1G29880	OG0002387	.	protein_coding	glycyl-tR synthetase / glycine-tR ligase	.	glycyl-tR synthetase / glycine--tR ligase%3B FUNCTIONS IN: glycine-tR ligase activity%2C nucleotide binding%2C aminoacyl-tR ligase activity%2C ATP binding%3B INVOLVED IN: response to cadmium ion%2C glycyl-tR aminoacylation%3B LOCATED IN: mitochondrion%3B EXPRESSED IN: 24 plant structures%3B EXPRESSED DURING: 14 growth stages%3B CONTAINS InterPro DOMAIN/s: Aminoacyl-tR synthetase%2C class II (G/ H…	.	glycyl-tR synthetase / glycine--tR ligase%3B FUNCTIONS IN: glycine-tR ligase activity%2C nucleotide binding%2C aminoacyl-tR ligase activity%2C ATP binding%3B INVOLVED IN: response to cadmium ion%2C glycyl-tR aminoacylation%3B LOCATED IN: mitochondrion%3B EXPRESSED IN: 24 plant structures%3B EXPRESSED DURING: 14 growth stages%3B CONTAINS InterPro DOMAIN/s: Aminoacyl-tR synthetase%2C class II (G/ H…	scaffold_1	13171213	13174401	3189	-	scaffold_1	13174030	13174373	344	*	0.171740014895056	-0.068867383072089	229.791676314344	0.430178571428571	2.59461672436235	0.0143219748601	23.5194	-0.2821429	0.33357143	0.228042328	0.350806452	0.172857143	0.455	NO	MODERATE	NO	NO	NO	B	B	-2.16531480830969	1.98629027354255	0.615676690834332	-1.71186557647579	-0.393973578874203	3.71968145689086	0.659484613044654	-1.7332464434453	-4.15160508185224	2.32754226731012
AL1G43730	AT1G29880	OG0002387	.	protein_coding	glycyl-tR synthetase / glycine-tR ligase	.	glycyl-tR synthetase / glycine--tR ligase%3B FUNCTIONS IN: glycine-tR ligase activity%2C nucleotide binding%2C aminoacyl-tR ligase activity%2C ATP binding%3B INVOLVED IN: response to cadmium ion%2C glycyl-tR aminoacylation%3B LOCATED IN: mitochondrion%3B EXPRESSED IN: 24 plant structures%3B EXPRESSED DURING: 14 growth stages%3B CONTAINS InterPro DOMAIN/s: Aminoacyl-tR synthetase%2C class II (G/ H…	.	glycyl-tR synthetase / glycine--tR ligase%3B FUNCTIONS IN: glycine-tR ligase activity%2C nucleotide binding%2C aminoacyl-tR ligase activity%2C ATP binding%3B INVOLVED IN: response to cadmium ion%2C glycyl-tR aminoacylation%3B LOCATED IN: mitochondrion%3B EXPRESSED IN: 24 plant structures%3B EXPRESSED DURING: 14 growth stages%3B CONTAINS InterPro DOMAIN/s: Aminoacyl-tR synthetase%2C class II (G/ H…	scaffold_1	13171213	13174401	3189	-	scaffold_1	13174030	13174373	344	*	0.171740014895056	-0.068867383072089	229.791676314344	0.430178571428571	2.59461672436235	0.0143219748601	23.5194	-0.2821429	0.33357143	0.228042328	0.350806452	0.172857143	0.455	NO	NO	NO	NO	NO	B	B	-2.16531480830969	1.98629027354255	0.615676690834332	-1.71186557647579	-0.393973578874203	3.71968145689086	0.659484613044654	-1.7332464434453	-4.15160508185224	2.32754226731012
AL1G43730	AT1G29880	OG0002387	.	protein_coding	glycyl-tR synthetase / glycine-tR ligase	.	glycyl-tR synthetase / glycine--tR ligase%3B FUNCTIONS IN: glycine-tR ligase activity%2C nucleotide binding%2C aminoacyl-tR ligase activity%2C ATP binding%3B INVOLVED IN: response to cadmium ion%2C glycyl-tR aminoacylation%3B LOCATED IN: mitochondrion%3B EXPRESSED IN: 24 plant structures%3B EXPRESSED DURING: 14 growth stages%3B CONTAINS InterPro DOMAIN/s: Aminoacyl-tR synthetase%2C class II (G/ H…	.	glycyl-tR synthetase / glycine--tR ligase%3B FUNCTIONS IN: glycine-tR ligase activity%2C nucleotide binding%2C aminoacyl-tR ligase activity%2C ATP binding%3B INVOLVED IN: response to cadmium ion%2C glycyl-tR aminoacylation%3B LOCATED IN: mitochondrion%3B EXPRESSED IN: 24 plant structures%3B EXPRESSED DURING: 14 growth stages%3B CONTAINS InterPro DOMAIN/s: Aminoacyl-tR synthetase%2C class II (G/ H…	scaffold_1	13171213	13174401	3189	-	scaffold_1	13174030	13174373	344	*	0.171740014895056	-0.068867383072089	229.791676314344	0.430178571428571	2.59461672436235	0.0143219748601	23.5194	-0.2821429	0.33357143	0.228042328	0.350806452	0.172857143	0.455	NO	NO	NO	NO	NO	B	B	-2.16531480830969	1.98629027354255	0.615676690834332	-1.71186557647579	-0.393973578874203	3.71968145689086	0.659484613044654	-1.7332464434453	-4.15160508185224	2.32754226731012
AL1G43740	AT2G34410	OG0000983	RWA3	protein_coding	O-acetyltransferase family protein	REDUCED WALL ACETYLATION 3	O-acetyltransferase family protein%3B FUNCTIONS IN: O-acetyltransferase activity%3B INVOLVED IN: biological_process unknown%3B LOCATED IN: endomembrane system%3B EXPRESSED IN: cultured cell%3B CONTAINS InterPro DOMAIN/s: Cas1p-like (InterPro:IPR012419)%3B BEST Arabidopsis thaliana protein match is: O-acetyltransferase family protein (TAIR:AT1G29890.2)%3B Has 35333 Blast hits to 34131 proteins in …	Encodes a homolog of the protein Cas1p known to be involved in polysaccharide O-acetylation in Cryptococcus neoformans. Has high similarity to RWA2 whose mutant displays reduced acetylation. The protein is expressed in the Golgi and is involved in the acetylation of xylan during secondary wall biosynthesis.	O-acetyltransferase family protein%3B FUNCTIONS IN: O-acetyltransferase activity%3B INVOLVED IN: biological_process unknown%3B LOCATED IN: endomembrane system%3B EXPRESSED IN: cultured cell%3B CONTAINS InterPro DOMAIN/s: Cas1p-like (InterPro:IPR012419)%3B BEST Arabidopsis thaliana protein match is: O-acetyltransferase family protein (TAIR:AT1G29890.2)%3B Has 35333 Blast hits to 34131 proteins in …	scaffold_1	13175066	13179641	4576	+	scaffold_1	13174030	13174373	344	*	0.171740014895056	-0.068867383072089	229.791676314344	0.430178571428571	2.59461672436235	0.0143219748601	23.5194	-0.2821429	0.33357143	0.228042328	0.350806452	0.172857143	0.455	NO	NO	NO	NO	NO	C	B	-2.16531480830969	1.98629027354255	0.615676690834332	-1.71186557647579	-0.393973578874203	3.71968145689086	0.659484613044654	-1.7332464434453	-4.15160508185224	2.32754226731012
AL1G43740	AT2G34410	OG0000983	RWA3	protein_coding	O-acetyltransferase family protein	REDUCED WALL ACETYLATION 3	O-acetyltransferase family protein%3B FUNCTIONS IN: O-acetyltransferase activity%3B INVOLVED IN: biological_process unknown%3B LOCATED IN: endomembrane system%3B EXPRESSED IN: cultured cell%3B CONTAINS InterPro DOMAIN/s: Cas1p-like (InterPro:IPR012419)%3B BEST Arabidopsis thaliana protein match is: O-acetyltransferase family protein (TAIR:AT1G29890.2)%3B Has 35333 Blast hits to 34131 proteins in …	Encodes a homolog of the protein Cas1p known to be involved in polysaccharide O-acetylation in Cryptococcus neoformans. Has high similarity to RWA2 whose mutant displays reduced acetylation. The protein is expressed in the Golgi and is involved in the acetylation of xylan during secondary wall biosynthesis.	O-acetyltransferase family protein%3B FUNCTIONS IN: O-acetyltransferase activity%3B INVOLVED IN: biological_process unknown%3B LOCATED IN: endomembrane system%3B EXPRESSED IN: cultured cell%3B CONTAINS InterPro DOMAIN/s: Cas1p-like (InterPro:IPR012419)%3B BEST Arabidopsis thaliana protein match is: O-acetyltransferase family protein (TAIR:AT1G29890.2)%3B Has 35333 Blast hits to 34131 proteins in …	scaffold_1	13175066	13179641	4576	+	scaffold_1	13174030	13174373	344	*	0.171740014895056	-0.068867383072089	229.791676314344	0.430178571428571	2.59461672436235	0.0143219748601	23.5194	-0.2821429	0.33357143	0.228042328	0.350806452	0.172857143	0.455	NO	NO	NO	NO	NO	C	B	-2.16531480830969	1.98629027354255	0.615676690834332	-1.71186557647579	-0.393973578874203	3.71968145689086	0.659484613044654	-1.7332464434453	-4.15160508185224	2.32754226731012
AL1G43740	AT1G29890	OG0000983	RWA4	protein_coding	O-acetyltransferase family protein	REDUCED WALL ACETYLATION 4	O-acetyltransferase family protein%3B FUNCTIONS IN: molecular_function unknown%3B INVOLVED IN: biological_process unknown%3B LOCATED IN: endomembrane system%3B CONTAINS InterPro DOMAIN/s: Cas1p-like (InterPro:IPR012419)%3B BEST Arabidopsis thaliana protein match is: O-acetyltransferase family protein (TAIR:AT2G34410.2)%3B Has 271 Blast hits to 269 proteins in 83 species: Archae - 0%3B Bacteria - …	Encodes a homolog of the protein Cas1p known to be involved in polysaccharide O-acetylation in Cryptococcus neoformans. Has high similarity to RWA2 whose mutant displays reduced acetylation. The protein is expressed in the Golgi and is involved in the acetylation of xylan during secondary wall biosynthesis.	O-acetyltransferase family protein%3B FUNCTIONS IN: molecular_function unknown%3B INVOLVED IN: biological_process unknown%3B LOCATED IN: endomembrane system%3B CONTAINS InterPro DOMAIN/s: Cas1p-like (InterPro:IPR012419)%3B BEST Arabidopsis thaliana protein match is: O-acetyltransferase family protein (TAIR:AT2G34410.2)%3B Has 271 Blast hits to 269 proteins in 83 species: Archae - 0%3B Bacteria - …	scaffold_1	13175066	13179641	4576	+	scaffold_1	13174030	13174373	344	*	0.171740014895056	-0.068867383072089	229.791676314344	0.430178571428571	2.59461672436235	0.0143219748601	23.5194	-0.2821429	0.33357143	0.228042328	0.350806452	0.172857143	0.455	NO	NO	NO	NO	NO	C	B	-2.16531480830969	1.98629027354255	0.615676690834332	-1.71186557647579	-0.393973578874203	3.71968145689086	0.659484613044654	-1.7332464434453	-4.15160508185224	2.32754226731012
AL1G43740	AT1G29890	OG0000983	RWA4	protein_coding	O-acetyltransferase family protein	REDUCED WALL ACETYLATION 4	O-acetyltransferase family protein%3B FUNCTIONS IN: molecular_function unknown%3B INVOLVED IN: biological_process unknown%3B LOCATED IN: endomembrane system%3B CONTAINS InterPro DOMAIN/s: Cas1p-like (InterPro:IPR012419)%3B BEST Arabidopsis thaliana protein match is: O-acetyltransferase family protein (TAIR:AT2G34410.2)%3B Has 271 Blast hits to 269 proteins in 83 species: Archae - 0%3B Bacteria - …	Encodes a homolog of the protein Cas1p known to be involved in polysaccharide O-acetylation in Cryptococcus neoformans. Has high similarity to RWA2 whose mutant displays reduced acetylation. The protein is expressed in the Golgi and is involved in the acetylation of xylan during secondary wall biosynthesis.	O-acetyltransferase family protein%3B FUNCTIONS IN: molecular_function unknown%3B INVOLVED IN: biological_process unknown%3B LOCATED IN: endomembrane system%3B CONTAINS InterPro DOMAIN/s: Cas1p-like (InterPro:IPR012419)%3B BEST Arabidopsis thaliana protein match is: O-acetyltransferase family protein (TAIR:AT2G34410.2)%3B Has 271 Blast hits to 269 proteins in 83 species: Archae - 0%3B Bacteria - …	scaffold_1	13175066	13179641	4576	+	scaffold_1	13174030	13174373	344	*	0.171740014895056	-0.068867383072089	229.791676314344	0.430178571428571	2.59461672436235	0.0143219748601	23.5194	-0.2821429	0.33357143	0.228042328	0.350806452	0.172857143	0.455	NO	NO	NO	NO	NO	C	B	-2.16531480830969	1.98629027354255	0.615676690834332	-1.71186557647579	-0.393973578874203	3.71968145689086	0.659484613044654	-1.7332464434453	-4.15160508185224	2.32754226731012
AL1G44240	AT1G30290	OG0016868	.	protein_coding	Tetratricopeptide repeat (TPR)-like superfamily protein	.	Tetratricopeptide repeat (TPR)-like superfamily protein%3B CONTAINS InterPro DOMAIN/s: Pentatricopeptide repeat (InterPro:IPR002885)%3B BEST Arabidopsis thaliana protein match is: Tetratricopeptide repeat (TPR)-like superfamily protein (TAIR:AT5G39710.1)%3B Has 53503 Blast hits to 14133 proteins in 285 species: Archae - 8%3B Bacteria - 48%3B Metazoa - 606%3B Fungi - 664%3B Plants - 50511%3B Virus…	unknown protein	Tetratricopeptide repeat (TPR)-like superfamily protein%3B CONTAINS InterPro DOMAIN/s: Pentatricopeptide repeat (InterPro:IPR002885)%3B BEST Arabidopsis thaliana protein match is: Tetratricopeptide repeat (TPR)-like superfamily protein (TAIR:AT5G39710.1)%3B Has 53503 Blast hits to 14133 proteins in 285 species: Archae - 8%3B Bacteria - 48%3B Metazoa - 606%3B Fungi - 664%3B Plants - 50511%3B Virus…	scaffold_1	13464151	13469395	5245	-	scaffold_1	13465225	13465474	250	*	0.223528572300508	-0.022975494539028	223.590677558622	0.390178571428571	3.20907597337496	0.00388141334479	5.4592	-0.22125	0.35660714	0.297037037	0.164435484	0.27	0.49125	NO	MODERATE	NO	0	0.15625	B	B	-1.58730281260057	-1.09937660878817	-1.13845076080107	-1.91301671795795	0.184038416834917	0.634014574560136	-1.09464283859075	-1.93439758492746	-0.4879262038124	0.77456595715688
AL1G44240	AT1G30290	OG0016868	.	protein_coding	Tetratricopeptide repeat (TPR)-like superfamily protein	.	Tetratricopeptide repeat (TPR)-like superfamily protein%3B CONTAINS InterPro DOMAIN/s: Pentatricopeptide repeat (InterPro:IPR002885)%3B BEST Arabidopsis thaliana protein match is: Tetratricopeptide repeat (TPR)-like superfamily protein (TAIR:AT5G39710.1)%3B Has 53503 Blast hits to 14133 proteins in 285 species: Archae - 8%3B Bacteria - 48%3B Metazoa - 606%3B Fungi - 664%3B Plants - 50511%3B Virus…	unknown protein	Tetratricopeptide repeat (TPR)-like superfamily protein%3B CONTAINS InterPro DOMAIN/s: Pentatricopeptide repeat (InterPro:IPR002885)%3B BEST Arabidopsis thaliana protein match is: Tetratricopeptide repeat (TPR)-like superfamily protein (TAIR:AT5G39710.1)%3B Has 53503 Blast hits to 14133 proteins in 285 species: Archae - 8%3B Bacteria - 48%3B Metazoa - 606%3B Fungi - 664%3B Plants - 50511%3B Virus…	scaffold_1	13464151	13469395	5245	-	scaffold_1	13465225	13465474	250	*	0.223528572300508	-0.022975494539028	223.590677558622	0.390178571428571	3.20907597337496	0.00388141334479	5.4592	-0.22125	0.35660714	0.297037037	0.164435484	0.27	0.49125	NO	NO	NO	0	0.15625	B	B	-1.58730281260057	-1.09937660878817	-1.13845076080107	-1.91301671795795	0.184038416834917	0.634014574560136	-1.09464283859075	-1.93439758492746	-0.4879262038124	0.77456595715688
AL1G45800	AT1G31730	OG0013091	.	protein_coding	Adaptin family protein	.	Adaptin family protein%3B FUNCTIONS IN: clathrin binding%2C binding%3B INVOLVED IN: intracellular protein transport%2C vesicle-mediated transport%3B LOCATED IN: membrane coat%3B EXPRESSED IN: 24 plant structures%3B EXPRESSED DURING: 13 growth stages%3B CONTAINS InterPro DOMAIN/s: Armadillo-like helical (InterPro:IPR011989)%2C Adaptor protein complex AP-4%2C epsilon subunit (InterPro:IPR017109)%2C…	.	Adaptin family protein%3B FUNCTIONS IN: clathrin binding%2C binding%3B INVOLVED IN: intracellular protein transport%2C vesicle-mediated transport%3B LOCATED IN: membrane coat%3B EXPRESSED IN: 24 plant structures%3B EXPRESSED DURING: 13 growth stages%3B CONTAINS InterPro DOMAIN/s: Armadillo-like helical (InterPro:IPR011989)%2C Adaptor protein complex AP-4%2C epsilon subunit (InterPro:IPR017109)%2C…	scaffold_1	14361560	14366124	4565	+	scaffold_1	14363159	14363468	310	*	0.279973642914478	-0.221564254786578	232.54463196565	0.424285714285714	4.76005355216988	3.47844308701E-4	17.2784	-0.04357143	0.40428571	0.092063492	0.298548387	0.231428571	0.275	NO	NO	NO	NO	NO	B	A	-4.03273817906227	1.02399591638817	-2.73511614316938	0.220572631004583	-2.26139694962678	2.75738709973648	-2.69130822095906	0.199191764035076	-5.05673409545044	-2.95568877417396
AL1G45800	AT1G31730	OG0013091	.	protein_coding	Adaptin family protein	.	Adaptin family protein%3B FUNCTIONS IN: clathrin binding%2C binding%3B INVOLVED IN: intracellular protein transport%2C vesicle-mediated transport%3B LOCATED IN: membrane coat%3B EXPRESSED IN: 24 plant structures%3B EXPRESSED DURING: 13 growth stages%3B CONTAINS InterPro DOMAIN/s: Armadillo-like helical (InterPro:IPR011989)%2C Adaptor protein complex AP-4%2C epsilon subunit (InterPro:IPR017109)%2C…	.	Adaptin family protein%3B FUNCTIONS IN: clathrin binding%2C binding%3B INVOLVED IN: intracellular protein transport%2C vesicle-mediated transport%3B LOCATED IN: membrane coat%3B EXPRESSED IN: 24 plant structures%3B EXPRESSED DURING: 13 growth stages%3B CONTAINS InterPro DOMAIN/s: Armadillo-like helical (InterPro:IPR011989)%2C Adaptor protein complex AP-4%2C epsilon subunit (InterPro:IPR017109)%2C…	scaffold_1	14361560	14366124	4565	+	scaffold_1	14364397	14364682	286	*	0.47796335802966	-0.32009530989793	314.164985231679	0.607678571428572	8.02996181822632	6.3294734388E-5	11.0387	0.3689286	0.59607143	0.097142857	0.237741935	0.551428571	0.1825	NO	NO	NO	NO	NO	B	A	-3.10711057754206	-0.661148662102838	-6.51105656419423	0.821251556947869	-1.33576934810657	1.07224252124547	-6.46724864198391	0.799870689978362	-2.44596191543922	-7.3323081211421
AL1G45800	AT1G31730	OG0013091	.	protein_coding	Adaptin family protein	.	Adaptin family protein%3B FUNCTIONS IN: clathrin binding%2C binding%3B INVOLVED IN: intracellular protein transport%2C vesicle-mediated transport%3B LOCATED IN: membrane coat%3B EXPRESSED IN: 24 plant structures%3B EXPRESSED DURING: 13 growth stages%3B CONTAINS InterPro DOMAIN/s: Armadillo-like helical (InterPro:IPR011989)%2C Adaptor protein complex AP-4%2C epsilon subunit (InterPro:IPR017109)%2C…	.	Adaptin family protein%3B FUNCTIONS IN: clathrin binding%2C binding%3B INVOLVED IN: intracellular protein transport%2C vesicle-mediated transport%3B LOCATED IN: membrane coat%3B EXPRESSED IN: 24 plant structures%3B EXPRESSED DURING: 13 growth stages%3B CONTAINS InterPro DOMAIN/s: Armadillo-like helical (InterPro:IPR011989)%2C Adaptor protein complex AP-4%2C epsilon subunit (InterPro:IPR017109)%2C…	scaffold_1	14361560	14366124	4565	+	scaffold_1	14364397	14364682	286	*	0.47796335802966	-0.32009530989793	314.164985231679	0.607678571428572	8.02996181822632	6.3294734388E-5	11.0387	0.3689286	0.59607143	0.097142857	0.237741935	0.551428571	0.1825	NO	NO	NO	NO	NO	A	A	-3.10711057754206	-0.661148662102838	-6.51105656419423	0.821251556947869	-1.33576934810657	1.07224252124547	-6.46724864198391	0.799870689978362	-2.44596191543922	-7.3323081211421
AL1G45800	AT1G31730	OG0013091	.	protein_coding	Adaptin family protein	.	Adaptin family protein%3B FUNCTIONS IN: clathrin binding%2C binding%3B INVOLVED IN: intracellular protein transport%2C vesicle-mediated transport%3B LOCATED IN: membrane coat%3B EXPRESSED IN: 24 plant structures%3B EXPRESSED DURING: 13 growth stages%3B CONTAINS InterPro DOMAIN/s: Armadillo-like helical (InterPro:IPR011989)%2C Adaptor protein complex AP-4%2C epsilon subunit (InterPro:IPR017109)%2C…	.	Adaptin family protein%3B FUNCTIONS IN: clathrin binding%2C binding%3B INVOLVED IN: intracellular protein transport%2C vesicle-mediated transport%3B LOCATED IN: membrane coat%3B EXPRESSED IN: 24 plant structures%3B EXPRESSED DURING: 13 growth stages%3B CONTAINS InterPro DOMAIN/s: Armadillo-like helical (InterPro:IPR011989)%2C Adaptor protein complex AP-4%2C epsilon subunit (InterPro:IPR017109)%2C…	scaffold_1	14361560	14366124	4565	+	scaffold_1	14363159	14363468	310	*	0.279973642914478	-0.221564254786578	232.54463196565	0.424285714285714	4.76005355216988	3.47844308701E-4	17.2784	-0.04357143	0.40428571	0.092063492	0.298548387	0.231428571	0.275	NO	NO	NO	NO	NO	A	A	-4.03273817906227	1.02399591638817	-2.73511614316938	0.220572631004583	-2.26139694962678	2.75738709973648	-2.69130822095906	0.199191764035076	-5.05673409545044	-2.95568877417396
AL1G45800	AT1G31730	OG0013091	.	protein_coding	Adaptin family protein	.	Adaptin family protein%3B FUNCTIONS IN: clathrin binding%2C binding%3B INVOLVED IN: intracellular protein transport%2C vesicle-mediated transport%3B LOCATED IN: membrane coat%3B EXPRESSED IN: 24 plant structures%3B EXPRESSED DURING: 13 growth stages%3B CONTAINS InterPro DOMAIN/s: Armadillo-like helical (InterPro:IPR011989)%2C Adaptor protein complex AP-4%2C epsilon subunit (InterPro:IPR017109)%2C…	.	Adaptin family protein%3B FUNCTIONS IN: clathrin binding%2C binding%3B INVOLVED IN: intracellular protein transport%2C vesicle-mediated transport%3B LOCATED IN: membrane coat%3B EXPRESSED IN: 24 plant structures%3B EXPRESSED DURING: 13 growth stages%3B CONTAINS InterPro DOMAIN/s: Armadillo-like helical (InterPro:IPR011989)%2C Adaptor protein complex AP-4%2C epsilon subunit (InterPro:IPR017109)%2C…	scaffold_1	14361560	14366124	4565	+	scaffold_1	14365504	14366237	734	*	0.224668787531419	-0.206433235642133	171.969696943838	0.311607142857143	4.73831134342456	3.47844308701E-4	12.7912	-0.08160714	0.29875	0.042962963	0.230725806	0.117142857	0.19875	NO	NO	NO	NO	NO	B	A	-4.03678022099031	-0.0346784702777673	-1.68012027907986	0.0221959880256239	-2.26543899155482	1.69871271307054	-1.63631235686954	8.15121056117019E-4	-4.00210175071254	-1.70231626710548
AL1G45800	AT1G31730	OG0013091	.	protein_coding	Adaptin family protein	.	Adaptin family protein%3B FUNCTIONS IN: clathrin binding%2C binding%3B INVOLVED IN: intracellular protein transport%2C vesicle-mediated transport%3B LOCATED IN: membrane coat%3B EXPRESSED IN: 24 plant structures%3B EXPRESSED DURING: 13 growth stages%3B CONTAINS InterPro DOMAIN/s: Armadillo-like helical (InterPro:IPR011989)%2C Adaptor protein complex AP-4%2C epsilon subunit (InterPro:IPR017109)%2C…	.	Adaptin family protein%3B FUNCTIONS IN: clathrin binding%2C binding%3B INVOLVED IN: intracellular protein transport%2C vesicle-mediated transport%3B LOCATED IN: membrane coat%3B EXPRESSED IN: 24 plant structures%3B EXPRESSED DURING: 13 growth stages%3B CONTAINS InterPro DOMAIN/s: Armadillo-like helical (InterPro:IPR011989)%2C Adaptor protein complex AP-4%2C epsilon subunit (InterPro:IPR017109)%2C…	scaffold_1	14361560	14366124	4565	+	scaffold_1	14364397	14364682	286	*	0.47796335802966	-0.32009530989793	314.164985231679	0.607678571428572	8.02996181822632	6.3294734388E-5	11.0387	0.3689286	0.59607143	0.097142857	0.237741935	0.551428571	0.1825	NO	NO	NO	NO	NO	B	A	-3.10711057754206	-0.661148662102838	-6.51105656419423	0.821251556947869	-1.33576934810657	1.07224252124547	-6.46724864198391	0.799870689978362	-2.44596191543922	-7.3323081211421
AL1G45800	AT1G31730	OG0013091	.	protein_coding	Adaptin family protein	.	Adaptin family protein%3B FUNCTIONS IN: clathrin binding%2C binding%3B INVOLVED IN: intracellular protein transport%2C vesicle-mediated transport%3B LOCATED IN: membrane coat%3B EXPRESSED IN: 24 plant structures%3B EXPRESSED DURING: 13 growth stages%3B CONTAINS InterPro DOMAIN/s: Armadillo-like helical (InterPro:IPR011989)%2C Adaptor protein complex AP-4%2C epsilon subunit (InterPro:IPR017109)%2C…	.	Adaptin family protein%3B FUNCTIONS IN: clathrin binding%2C binding%3B INVOLVED IN: intracellular protein transport%2C vesicle-mediated transport%3B LOCATED IN: membrane coat%3B EXPRESSED IN: 24 plant structures%3B EXPRESSED DURING: 13 growth stages%3B CONTAINS InterPro DOMAIN/s: Armadillo-like helical (InterPro:IPR011989)%2C Adaptor protein complex AP-4%2C epsilon subunit (InterPro:IPR017109)%2C…	scaffold_1	14361560	14366124	4565	+	scaffold_1	14364154	14364395	242	*	0.394750051127027	-0.280812688404374	238.008049801816	0.488839285714286	6.72880053134016	6.3294734388E-5	10.5129	0.2192857	0.48214286	0.071322751	0.219354839	0.414285714	0.195	NO	NO	NO	NO	NO	B	A	-3.49110456070546	0.00899373059464714	-5.88435752851121	1.01685370142363	-1.71976333126997	1.74238491394295	-5.84054960630089	0.995472834454123	-3.50009829130011	-6.90121122993484
AL1G45800	AT1G31730	OG0013091	.	protein_coding	Adaptin family protein	.	Adaptin family protein%3B FUNCTIONS IN: clathrin binding%2C binding%3B INVOLVED IN: intracellular protein transport%2C vesicle-mediated transport%3B LOCATED IN: membrane coat%3B EXPRESSED IN: 24 plant structures%3B EXPRESSED DURING: 13 growth stages%3B CONTAINS InterPro DOMAIN/s: Armadillo-like helical (InterPro:IPR011989)%2C Adaptor protein complex AP-4%2C epsilon subunit (InterPro:IPR017109)%2C…	.	Adaptin family protein%3B FUNCTIONS IN: clathrin binding%2C binding%3B INVOLVED IN: intracellular protein transport%2C vesicle-mediated transport%3B LOCATED IN: membrane coat%3B EXPRESSED IN: 24 plant structures%3B EXPRESSED DURING: 13 growth stages%3B CONTAINS InterPro DOMAIN/s: Armadillo-like helical (InterPro:IPR011989)%2C Adaptor protein complex AP-4%2C epsilon subunit (InterPro:IPR017109)%2C…	scaffold_1	14361560	14366124	4565	+	scaffold_1	14364154	14364395	242	*	0.394750051127027	-0.280812688404374	238.008049801816	0.488839285714286	6.72880053134016	6.3294734388E-5	10.5129	0.2192857	0.48214286	0.071322751	0.219354839	0.414285714	0.195	NO	NO	NO	NO	NO	B	A	-3.49110456070546	0.00899373059464714	-5.88435752851121	1.01685370142363	-1.71976333126997	1.74238491394295	-5.84054960630089	0.995472834454123	-3.50009829130011	-6.90121122993484
AL1G45800	AT1G31730	OG0013091	.	protein_coding	Adaptin family protein	.	Adaptin family protein%3B FUNCTIONS IN: clathrin binding%2C binding%3B INVOLVED IN: intracellular protein transport%2C vesicle-mediated transport%3B LOCATED IN: membrane coat%3B EXPRESSED IN: 24 plant structures%3B EXPRESSED DURING: 13 growth stages%3B CONTAINS InterPro DOMAIN/s: Armadillo-like helical (InterPro:IPR011989)%2C Adaptor protein complex AP-4%2C epsilon subunit (InterPro:IPR017109)%2C…	.	Adaptin family protein%3B FUNCTIONS IN: clathrin binding%2C binding%3B INVOLVED IN: intracellular protein transport%2C vesicle-mediated transport%3B LOCATED IN: membrane coat%3B EXPRESSED IN: 24 plant structures%3B EXPRESSED DURING: 13 growth stages%3B CONTAINS InterPro DOMAIN/s: Armadillo-like helical (InterPro:IPR011989)%2C Adaptor protein complex AP-4%2C epsilon subunit (InterPro:IPR017109)%2C…	scaffold_1	14361560	14366124	4565	+	scaffold_1	14363159	14363468	310	*	0.279973642914478	-0.221564254786578	232.54463196565	0.424285714285714	4.76005355216988	3.47844308701E-4	17.2784	-0.04357143	0.40428571	0.092063492	0.298548387	0.231428571	0.275	NO	NO	NO	NO	NO	B	A	-4.03273817906227	1.02399591638817	-2.73511614316938	0.220572631004583	-2.26139694962678	2.75738709973648	-2.69130822095906	0.199191764035076	-5.05673409545044	-2.95568877417396
AL1G45800	AT1G31730	OG0013091	.	protein_coding	Adaptin family protein	.	Adaptin family protein%3B FUNCTIONS IN: clathrin binding%2C binding%3B INVOLVED IN: intracellular protein transport%2C vesicle-mediated transport%3B LOCATED IN: membrane coat%3B EXPRESSED IN: 24 plant structures%3B EXPRESSED DURING: 13 growth stages%3B CONTAINS InterPro DOMAIN/s: Armadillo-like helical (InterPro:IPR011989)%2C Adaptor protein complex AP-4%2C epsilon subunit (InterPro:IPR017109)%2C…	.	Adaptin family protein%3B FUNCTIONS IN: clathrin binding%2C binding%3B INVOLVED IN: intracellular protein transport%2C vesicle-mediated transport%3B LOCATED IN: membrane coat%3B EXPRESSED IN: 24 plant structures%3B EXPRESSED DURING: 13 growth stages%3B CONTAINS InterPro DOMAIN/s: Armadillo-like helical (InterPro:IPR011989)%2C Adaptor protein complex AP-4%2C epsilon subunit (InterPro:IPR017109)%2C…	scaffold_1	14361560	14366124	4565	+	scaffold_1	14363469	14364149	681	*	0.222588707731755	-0.212828956939733	186.345858176419	0.326964285714286	4.81570022640848	6.3294734388E-5	5.8892	-0.009821429	0.31517857	0.045820106	0.291532258	0.261428571	0.27125	NO	NO	NO	NO	NO	B	A	-4.03273817906227	0.518000761452519	-2.73511614316938	0.464728499286377	-2.26139694962678	2.25139194480083	-2.69130822095906	0.44334763231687	-4.55073894051479	-3.19984464245576
AL1G45800	AT1G31730	OG0013091	.	protein_coding	Adaptin family protein	.	Adaptin family protein%3B FUNCTIONS IN: clathrin binding%2C binding%3B INVOLVED IN: intracellular protein transport%2C vesicle-mediated transport%3B LOCATED IN: membrane coat%3B EXPRESSED IN: 24 plant structures%3B EXPRESSED DURING: 13 growth stages%3B CONTAINS InterPro DOMAIN/s: Armadillo-like helical (InterPro:IPR011989)%2C Adaptor protein complex AP-4%2C epsilon subunit (InterPro:IPR017109)%2C…	.	Adaptin family protein%3B FUNCTIONS IN: clathrin binding%2C binding%3B INVOLVED IN: intracellular protein transport%2C vesicle-mediated transport%3B LOCATED IN: membrane coat%3B EXPRESSED IN: 24 plant structures%3B EXPRESSED DURING: 13 growth stages%3B CONTAINS InterPro DOMAIN/s: Armadillo-like helical (InterPro:IPR011989)%2C Adaptor protein complex AP-4%2C epsilon subunit (InterPro:IPR017109)%2C…	scaffold_1	14361560	14366124	4565	+	scaffold_1	14364683	14365079	397	*	0.333541275500803	-0.254852170453985	208.003557904856	0.412678571428571	5.8927783221974	6.3294734388E-5	4.0504	0.2083929	0.40839286	0.055238095	0.1925	0.377142857	0.16875	NO	NO	NO	NO	NO	B	A	-3.74777422313574	-0.971371882093149	-4.87187642312382	0.357910306913088	-1.97643299370025	0.762019301255157	-4.8280685009135	0.336529439943581	-2.77640234104259	-5.22978673003691
AL1G45800	AT1G31730	OG0013091	.	protein_coding	Adaptin family protein	.	Adaptin family protein%3B FUNCTIONS IN: clathrin binding%2C binding%3B INVOLVED IN: intracellular protein transport%2C vesicle-mediated transport%3B LOCATED IN: membrane coat%3B EXPRESSED IN: 24 plant structures%3B EXPRESSED DURING: 13 growth stages%3B CONTAINS InterPro DOMAIN/s: Armadillo-like helical (InterPro:IPR011989)%2C Adaptor protein complex AP-4%2C epsilon subunit (InterPro:IPR017109)%2C…	.	Adaptin family protein%3B FUNCTIONS IN: clathrin binding%2C binding%3B INVOLVED IN: intracellular protein transport%2C vesicle-mediated transport%3B LOCATED IN: membrane coat%3B EXPRESSED IN: 24 plant structures%3B EXPRESSED DURING: 13 growth stages%3B CONTAINS InterPro DOMAIN/s: Armadillo-like helical (InterPro:IPR011989)%2C Adaptor protein complex AP-4%2C epsilon subunit (InterPro:IPR017109)%2C…	scaffold_1	14361560	14366124	4565	+	scaffold_1	14362762	14363157	396	*	0.266779470374335	-0.223842089567903	190.117613382442	0.369910714285714	5.43503055526836	3.47844308701E-4	15.9541	-0.07214286	0.36071429	0.061693122	0.266129032	0.152857143	0.225	NO	NO	NO	NO	NO	B	A	-3.72958503445958	0.646005488147557	-1.44077793379389	0.382880793441911	-1.95824380502409	2.37939667149586	-1.39697001158357	0.361499926472404	-4.37559052260714	-1.8236587272358
AL1G45800	AT1G31730	OG0013091	.	protein_coding	Adaptin family protein	.	Adaptin family protein%3B FUNCTIONS IN: clathrin binding%2C binding%3B INVOLVED IN: intracellular protein transport%2C vesicle-mediated transport%3B LOCATED IN: membrane coat%3B EXPRESSED IN: 24 plant structures%3B EXPRESSED DURING: 13 growth stages%3B CONTAINS InterPro DOMAIN/s: Armadillo-like helical (InterPro:IPR011989)%2C Adaptor protein complex AP-4%2C epsilon subunit (InterPro:IPR017109)%2C…	.	Adaptin family protein%3B FUNCTIONS IN: clathrin binding%2C binding%3B INVOLVED IN: intracellular protein transport%2C vesicle-mediated transport%3B LOCATED IN: membrane coat%3B EXPRESSED IN: 24 plant structures%3B EXPRESSED DURING: 13 growth stages%3B CONTAINS InterPro DOMAIN/s: Armadillo-like helical (InterPro:IPR011989)%2C Adaptor protein complex AP-4%2C epsilon subunit (InterPro:IPR017109)%2C…	scaffold_1	14361560	14366124	4565	+	scaffold_1	14364683	14365079	397	*	0.333541275500803	-0.254852170453985	208.003557904856	0.412678571428571	5.8927783221974	6.3294734388E-5	4.0504	0.2083929	0.40839286	0.055238095	0.1925	0.377142857	0.16875	NO	NO	NO	NO	NO	A	A	-3.74777422313574	-0.971371882093149	-4.87187642312382	0.357910306913088	-1.97643299370025	0.762019301255157	-4.8280685009135	0.336529439943581	-2.77640234104259	-5.22978673003691
AL1G45800	AT1G31730	OG0013091	.	protein_coding	Adaptin family protein	.	Adaptin family protein%3B FUNCTIONS IN: clathrin binding%2C binding%3B INVOLVED IN: intracellular protein transport%2C vesicle-mediated transport%3B LOCATED IN: membrane coat%3B EXPRESSED IN: 24 plant structures%3B EXPRESSED DURING: 13 growth stages%3B CONTAINS InterPro DOMAIN/s: Armadillo-like helical (InterPro:IPR011989)%2C Adaptor protein complex AP-4%2C epsilon subunit (InterPro:IPR017109)%2C…	.	Adaptin family protein%3B FUNCTIONS IN: clathrin binding%2C binding%3B INVOLVED IN: intracellular protein transport%2C vesicle-mediated transport%3B LOCATED IN: membrane coat%3B EXPRESSED IN: 24 plant structures%3B EXPRESSED DURING: 13 growth stages%3B CONTAINS InterPro DOMAIN/s: Armadillo-like helical (InterPro:IPR011989)%2C Adaptor protein complex AP-4%2C epsilon subunit (InterPro:IPR017109)%2C…	scaffold_1	14361560	14366124	4565	+	scaffold_1	14362762	14363157	396	*	0.266779470374335	-0.223842089567903	190.117613382442	0.369910714285714	5.43503055526836	3.47844308701E-4	15.9541	-0.07214286	0.36071429	0.061693122	0.266129032	0.152857143	0.225	NO	NO	NO	NO	NO	B	A	-3.72958503445958	0.646005488147557	-1.44077793379389	0.382880793441911	-1.95824380502409	2.37939667149586	-1.39697001158357	0.361499926472404	-4.37559052260714	-1.8236587272358
AL1G45800	AT1G31730	OG0013091	.	protein_coding	Adaptin family protein	.	Adaptin family protein%3B FUNCTIONS IN: clathrin binding%2C binding%3B INVOLVED IN: intracellular protein transport%2C vesicle-mediated transport%3B LOCATED IN: membrane coat%3B EXPRESSED IN: 24 plant structures%3B EXPRESSED DURING: 13 growth stages%3B CONTAINS InterPro DOMAIN/s: Armadillo-like helical (InterPro:IPR011989)%2C Adaptor protein complex AP-4%2C epsilon subunit (InterPro:IPR017109)%2C…	.	Adaptin family protein%3B FUNCTIONS IN: clathrin binding%2C binding%3B INVOLVED IN: intracellular protein transport%2C vesicle-mediated transport%3B LOCATED IN: membrane coat%3B EXPRESSED IN: 24 plant structures%3B EXPRESSED DURING: 13 growth stages%3B CONTAINS InterPro DOMAIN/s: Armadillo-like helical (InterPro:IPR011989)%2C Adaptor protein complex AP-4%2C epsilon subunit (InterPro:IPR017109)%2C…	scaffold_1	14361560	14366124	4565	+	scaffold_1	14365504	14366237	734	*	0.224668787531419	-0.206433235642133	171.969696943838	0.311607142857143	4.73831134342456	3.47844308701E-4	12.7912	-0.08160714	0.29875	0.042962963	0.230725806	0.117142857	0.19875	NO	NO	NO	NO	NO	B	A	-4.03678022099031	-0.0346784702777673	-1.68012027907986	0.0221959880256239	-2.26543899155482	1.69871271307054	-1.63631235686954	8.15121056117019E-4	-4.00210175071254	-1.70231626710548
AL1G45800	AT1G31730	OG0013091	.	protein_coding	Adaptin family protein	.	Adaptin family protein%3B FUNCTIONS IN: clathrin binding%2C binding%3B INVOLVED IN: intracellular protein transport%2C vesicle-mediated transport%3B LOCATED IN: membrane coat%3B EXPRESSED IN: 24 plant structures%3B EXPRESSED DURING: 13 growth stages%3B CONTAINS InterPro DOMAIN/s: Armadillo-like helical (InterPro:IPR011989)%2C Adaptor protein complex AP-4%2C epsilon subunit (InterPro:IPR017109)%2C…	.	Adaptin family protein%3B FUNCTIONS IN: clathrin binding%2C binding%3B INVOLVED IN: intracellular protein transport%2C vesicle-mediated transport%3B LOCATED IN: membrane coat%3B EXPRESSED IN: 24 plant structures%3B EXPRESSED DURING: 13 growth stages%3B CONTAINS InterPro DOMAIN/s: Armadillo-like helical (InterPro:IPR011989)%2C Adaptor protein complex AP-4%2C epsilon subunit (InterPro:IPR017109)%2C…	scaffold_1	14361560	14366124	4565	+	scaffold_1	14364154	14364395	242	*	0.394750051127027	-0.280812688404374	238.008049801816	0.488839285714286	6.72880053134016	6.3294734388E-5	10.5129	0.2192857	0.48214286	0.071322751	0.219354839	0.414285714	0.195	NO	MODERATE	NO	NO	NO	B	A	-3.49110456070546	0.00899373059464714	-5.88435752851121	1.01685370142363	-1.71976333126997	1.74238491394295	-5.84054960630089	0.995472834454123	-3.50009829130011	-6.90121122993484
AL1G45800	AT1G31730	OG0013091	.	protein_coding	Adaptin family protein	.	Adaptin family protein%3B FUNCTIONS IN: clathrin binding%2C binding%3B INVOLVED IN: intracellular protein transport%2C vesicle-mediated transport%3B LOCATED IN: membrane coat%3B EXPRESSED IN: 24 plant structures%3B EXPRESSED DURING: 13 growth stages%3B CONTAINS InterPro DOMAIN/s: Armadillo-like helical (InterPro:IPR011989)%2C Adaptor protein complex AP-4%2C epsilon subunit (InterPro:IPR017109)%2C…	.	Adaptin family protein%3B FUNCTIONS IN: clathrin binding%2C binding%3B INVOLVED IN: intracellular protein transport%2C vesicle-mediated transport%3B LOCATED IN: membrane coat%3B EXPRESSED IN: 24 plant structures%3B EXPRESSED DURING: 13 growth stages%3B CONTAINS InterPro DOMAIN/s: Armadillo-like helical (InterPro:IPR011989)%2C Adaptor protein complex AP-4%2C epsilon subunit (InterPro:IPR017109)%2C…	scaffold_1	14361560	14366124	4565	+	scaffold_1	14363159	14363468	310	*	0.279973642914478	-0.221564254786578	232.54463196565	0.424285714285714	4.76005355216988	3.47844308701E-4	17.2784	-0.04357143	0.40428571	0.092063492	0.298548387	0.231428571	0.275	NO	MODERATE	NO	NO	NO	B	A	-4.03273817906227	1.02399591638817	-2.73511614316938	0.220572631004583	-2.26139694962678	2.75738709973648	-2.69130822095906	0.199191764035076	-5.05673409545044	-2.95568877417396
AL1G45800	AT1G31730	OG0013091	.	protein_coding	Adaptin family protein	.	Adaptin family protein%3B FUNCTIONS IN: clathrin binding%2C binding%3B INVOLVED IN: intracellular protein transport%2C vesicle-mediated transport%3B LOCATED IN: membrane coat%3B EXPRESSED IN: 24 plant structures%3B EXPRESSED DURING: 13 growth stages%3B CONTAINS InterPro DOMAIN/s: Armadillo-like helical (InterPro:IPR011989)%2C Adaptor protein complex AP-4%2C epsilon subunit (InterPro:IPR017109)%2C…	.	Adaptin family protein%3B FUNCTIONS IN: clathrin binding%2C binding%3B INVOLVED IN: intracellular protein transport%2C vesicle-mediated transport%3B LOCATED IN: membrane coat%3B EXPRESSED IN: 24 plant structures%3B EXPRESSED DURING: 13 growth stages%3B CONTAINS InterPro DOMAIN/s: Armadillo-like helical (InterPro:IPR011989)%2C Adaptor protein complex AP-4%2C epsilon subunit (InterPro:IPR017109)%2C…	scaffold_1	14361560	14366124	4565	+	scaffold_1	14364683	14365079	397	*	0.333541275500803	-0.254852170453985	208.003557904856	0.412678571428571	5.8927783221974	6.3294734388E-5	4.0504	0.2083929	0.40839286	0.055238095	0.1925	0.377142857	0.16875	NO	NO	NO	NO	NO	B	A	-3.74777422313574	-0.971371882093149	-4.87187642312382	0.357910306913088	-1.97643299370025	0.762019301255157	-4.8280685009135	0.336529439943581	-2.77640234104259	-5.22978673003691
AL1G45800	AT1G31730	OG0013091	.	protein_coding	Adaptin family protein	.	Adaptin family protein%3B FUNCTIONS IN: clathrin binding%2C binding%3B INVOLVED IN: intracellular protein transport%2C vesicle-mediated transport%3B LOCATED IN: membrane coat%3B EXPRESSED IN: 24 plant structures%3B EXPRESSED DURING: 13 growth stages%3B CONTAINS InterPro DOMAIN/s: Armadillo-like helical (InterPro:IPR011989)%2C Adaptor protein complex AP-4%2C epsilon subunit (InterPro:IPR017109)%2C…	.	Adaptin family protein%3B FUNCTIONS IN: clathrin binding%2C binding%3B INVOLVED IN: intracellular protein transport%2C vesicle-mediated transport%3B LOCATED IN: membrane coat%3B EXPRESSED IN: 24 plant structures%3B EXPRESSED DURING: 13 growth stages%3B CONTAINS InterPro DOMAIN/s: Armadillo-like helical (InterPro:IPR011989)%2C Adaptor protein complex AP-4%2C epsilon subunit (InterPro:IPR017109)%2C…	scaffold_1	14361560	14366124	4565	+	scaffold_1	14364154	14364395	242	*	0.394750051127027	-0.280812688404374	238.008049801816	0.488839285714286	6.72880053134016	6.3294734388E-5	10.5129	0.2192857	0.48214286	0.071322751	0.219354839	0.414285714	0.195	NO	NO	NO	NO	NO	B	A	-3.49110456070546	0.00899373059464714	-5.88435752851121	1.01685370142363	-1.71976333126997	1.74238491394295	-5.84054960630089	0.995472834454123	-3.50009829130011	-6.90121122993484
AL1G45800	AT1G31730	OG0013091	.	protein_coding	Adaptin family protein	.	Adaptin family protein%3B FUNCTIONS IN: clathrin binding%2C binding%3B INVOLVED IN: intracellular protein transport%2C vesicle-mediated transport%3B LOCATED IN: membrane coat%3B EXPRESSED IN: 24 plant structures%3B EXPRESSED DURING: 13 growth stages%3B CONTAINS InterPro DOMAIN/s: Armadillo-like helical (InterPro:IPR011989)%2C Adaptor protein complex AP-4%2C epsilon subunit (InterPro:IPR017109)%2C…	.	Adaptin family protein%3B FUNCTIONS IN: clathrin binding%2C binding%3B INVOLVED IN: intracellular protein transport%2C vesicle-mediated transport%3B LOCATED IN: membrane coat%3B EXPRESSED IN: 24 plant structures%3B EXPRESSED DURING: 13 growth stages%3B CONTAINS InterPro DOMAIN/s: Armadillo-like helical (InterPro:IPR011989)%2C Adaptor protein complex AP-4%2C epsilon subunit (InterPro:IPR017109)%2C…	scaffold_1	14361560	14366124	4565	+	scaffold_1	14364683	14365079	397	*	0.333541275500803	-0.254852170453985	208.003557904856	0.412678571428571	5.8927783221974	6.3294734388E-5	4.0504	0.2083929	0.40839286	0.055238095	0.1925	0.377142857	0.16875	NO	NO	NO	NO	NO	B	A	-3.74777422313574	-0.971371882093149	-4.87187642312382	0.357910306913088	-1.97643299370025	0.762019301255157	-4.8280685009135	0.336529439943581	-2.77640234104259	-5.22978673003691
AL1G45800	AT1G31730	OG0013091	.	protein_coding	Adaptin family protein	.	Adaptin family protein%3B FUNCTIONS IN: clathrin binding%2C binding%3B INVOLVED IN: intracellular protein transport%2C vesicle-mediated transport%3B LOCATED IN: membrane coat%3B EXPRESSED IN: 24 plant structures%3B EXPRESSED DURING: 13 growth stages%3B CONTAINS InterPro DOMAIN/s: Armadillo-like helical (InterPro:IPR011989)%2C Adaptor protein complex AP-4%2C epsilon subunit (InterPro:IPR017109)%2C…	.	Adaptin family protein%3B FUNCTIONS IN: clathrin binding%2C binding%3B INVOLVED IN: intracellular protein transport%2C vesicle-mediated transport%3B LOCATED IN: membrane coat%3B EXPRESSED IN: 24 plant structures%3B EXPRESSED DURING: 13 growth stages%3B CONTAINS InterPro DOMAIN/s: Armadillo-like helical (InterPro:IPR011989)%2C Adaptor protein complex AP-4%2C epsilon subunit (InterPro:IPR017109)%2C…	scaffold_1	14361560	14366124	4565	+	scaffold_1	14364154	14364395	242	*	0.394750051127027	-0.280812688404374	238.008049801816	0.488839285714286	6.72880053134016	6.3294734388E-5	10.5129	0.2192857	0.48214286	0.071322751	0.219354839	0.414285714	0.195	NO	NO	NO	NO	NO	A	A	-3.49110456070546	0.00899373059464714	-5.88435752851121	1.01685370142363	-1.71976333126997	1.74238491394295	-5.84054960630089	0.995472834454123	-3.50009829130011	-6.90121122993484
AL1G45800	AT1G31730	OG0013091	.	protein_coding	Adaptin family protein	.	Adaptin family protein%3B FUNCTIONS IN: clathrin binding%2C binding%3B INVOLVED IN: intracellular protein transport%2C vesicle-mediated transport%3B LOCATED IN: membrane coat%3B EXPRESSED IN: 24 plant structures%3B EXPRESSED DURING: 13 growth stages%3B CONTAINS InterPro DOMAIN/s: Armadillo-like helical (InterPro:IPR011989)%2C Adaptor protein complex AP-4%2C epsilon subunit (InterPro:IPR017109)%2C…	.	Adaptin family protein%3B FUNCTIONS IN: clathrin binding%2C binding%3B INVOLVED IN: intracellular protein transport%2C vesicle-mediated transport%3B LOCATED IN: membrane coat%3B EXPRESSED IN: 24 plant structures%3B EXPRESSED DURING: 13 growth stages%3B CONTAINS InterPro DOMAIN/s: Armadillo-like helical (InterPro:IPR011989)%2C Adaptor protein complex AP-4%2C epsilon subunit (InterPro:IPR017109)%2C…	scaffold_1	14361560	14366124	4565	+	scaffold_1	14362762	14363157	396	*	0.266779470374335	-0.223842089567903	190.117613382442	0.369910714285714	5.43503055526836	3.47844308701E-4	15.9541	-0.07214286	0.36071429	0.061693122	0.266129032	0.152857143	0.225	NO	NO	NO	NO	NO	B	A	-3.72958503445958	0.646005488147557	-1.44077793379389	0.382880793441911	-1.95824380502409	2.37939667149586	-1.39697001158357	0.361499926472404	-4.37559052260714	-1.8236587272358
AL1G45800	AT1G31730	OG0013091	.	protein_coding	Adaptin family protein	.	Adaptin family protein%3B FUNCTIONS IN: clathrin binding%2C binding%3B INVOLVED IN: intracellular protein transport%2C vesicle-mediated transport%3B LOCATED IN: membrane coat%3B EXPRESSED IN: 24 plant structures%3B EXPRESSED DURING: 13 growth stages%3B CONTAINS InterPro DOMAIN/s: Armadillo-like helical (InterPro:IPR011989)%2C Adaptor protein complex AP-4%2C epsilon subunit (InterPro:IPR017109)%2C…	.	Adaptin family protein%3B FUNCTIONS IN: clathrin binding%2C binding%3B INVOLVED IN: intracellular protein transport%2C vesicle-mediated transport%3B LOCATED IN: membrane coat%3B EXPRESSED IN: 24 plant structures%3B EXPRESSED DURING: 13 growth stages%3B CONTAINS InterPro DOMAIN/s: Armadillo-like helical (InterPro:IPR011989)%2C Adaptor protein complex AP-4%2C epsilon subunit (InterPro:IPR017109)%2C…	scaffold_1	14361560	14366124	4565	+	scaffold_1	14365094	14365468	375	*	0.220306199568993	-0.23292200689956	203.5580042877	0.325714285714286	4.83933536677344	3.47844308701E-4	4.8763	-0.1392857	0.32	0.025079365	0.342741935	0.115714286	0.255	NO	NO	NO	NO	NO	B	A	-4.47938381211023	1.8914161819921	-0.900683036207768	1.41915598438796	-2.70804258267474	3.62480736534041	-0.856875113997446	1.39777511741845	-6.37079999410233	-2.31983902059573
AL1G45800	AT1G31730	OG0013091	.	protein_coding	Adaptin family protein	.	Adaptin family protein%3B FUNCTIONS IN: clathrin binding%2C binding%3B INVOLVED IN: intracellular protein transport%2C vesicle-mediated transport%3B LOCATED IN: membrane coat%3B EXPRESSED IN: 24 plant structures%3B EXPRESSED DURING: 13 growth stages%3B CONTAINS InterPro DOMAIN/s: Armadillo-like helical (InterPro:IPR011989)%2C Adaptor protein complex AP-4%2C epsilon subunit (InterPro:IPR017109)%2C…	.	Adaptin family protein%3B FUNCTIONS IN: clathrin binding%2C binding%3B INVOLVED IN: intracellular protein transport%2C vesicle-mediated transport%3B LOCATED IN: membrane coat%3B EXPRESSED IN: 24 plant structures%3B EXPRESSED DURING: 13 growth stages%3B CONTAINS InterPro DOMAIN/s: Armadillo-like helical (InterPro:IPR011989)%2C Adaptor protein complex AP-4%2C epsilon subunit (InterPro:IPR017109)%2C…	scaffold_1	14361560	14366124	4565	+	scaffold_1	14363159	14363468	310	*	0.279973642914478	-0.221564254786578	232.54463196565	0.424285714285714	4.76005355216988	3.47844308701E-4	17.2784	-0.04357143	0.40428571	0.092063492	0.298548387	0.231428571	0.275	NO	NO	NO	NO	NO	B	A	-4.03273817906227	1.02399591638817	-2.73511614316938	0.220572631004583	-2.26139694962678	2.75738709973648	-2.69130822095906	0.199191764035076	-5.05673409545044	-2.95568877417396
AL1G45800	AT1G31730	OG0013091	.	protein_coding	Adaptin family protein	.	Adaptin family protein%3B FUNCTIONS IN: clathrin binding%2C binding%3B INVOLVED IN: intracellular protein transport%2C vesicle-mediated transport%3B LOCATED IN: membrane coat%3B EXPRESSED IN: 24 plant structures%3B EXPRESSED DURING: 13 growth stages%3B CONTAINS InterPro DOMAIN/s: Armadillo-like helical (InterPro:IPR011989)%2C Adaptor protein complex AP-4%2C epsilon subunit (InterPro:IPR017109)%2C…	.	Adaptin family protein%3B FUNCTIONS IN: clathrin binding%2C binding%3B INVOLVED IN: intracellular protein transport%2C vesicle-mediated transport%3B LOCATED IN: membrane coat%3B EXPRESSED IN: 24 plant structures%3B EXPRESSED DURING: 13 growth stages%3B CONTAINS InterPro DOMAIN/s: Armadillo-like helical (InterPro:IPR011989)%2C Adaptor protein complex AP-4%2C epsilon subunit (InterPro:IPR017109)%2C…	scaffold_1	14361560	14366124	4565	+	scaffold_1	14364397	14364682	286	*	0.47796335802966	-0.32009530989793	314.164985231679	0.607678571428572	8.02996181822632	6.3294734388E-5	11.0387	0.3689286	0.59607143	0.097142857	0.237741935	0.551428571	0.1825	NO	MODERATE	NO	NO	NO	B	A	-3.10711057754206	-0.661148662102838	-6.51105656419423	0.821251556947869	-1.33576934810657	1.07224252124547	-6.46724864198391	0.799870689978362	-2.44596191543922	-7.3323081211421
AL1G45810	AT1G31740	OG0013090	BGAL15	protein_coding	beta-galactosidase 15	beta-galactosidase 15	beta-galactosidase 15 (BGAL15)%3B FUNCTIONS IN: beta-galactosidase activity%3B INVOLVED IN: carbohydrate metabolic process%3B LOCATED IN: endomembrane system%3B EXPRESSED IN: 7 plant structures%3B CONTAINS InterPro DOMAIN/s: Glycoside hydrolase%2C family 35%2C conserved site (InterPro:IPR019801)%2C Glycoside hydrolase%2C family 35 (InterPro:IPR001944)%2C D-galactoside/L-rhamnose binding SUEL lect…	Encodes a putative %26beta%3B-galactosidase.	beta-galactosidase 15 (BGAL15)%3B FUNCTIONS IN: beta-galactosidase activity%3B INVOLVED IN: carbohydrate metabolic process%3B LOCATED IN: endomembrane system%3B EXPRESSED IN: 7 plant structures%3B CONTAINS InterPro DOMAIN/s: Glycoside hydrolase%2C family 35%2C conserved site (InterPro:IPR019801)%2C Glycoside hydrolase%2C family 35 (InterPro:IPR001944)%2C D-galactoside/L-rhamnose binding SUEL lect…	scaffold_1	14367378	14371605	4228	-	scaffold_1	14370416	14370933	518	*	0.473608406080382	-0.308584652025063	276.215430810835	0.554553571428571	8.81797428622996	6.3294734388E-5	29.2843	0.4491071	0.55160714	0.082539683	0.127983871	0.522857143	0.07375	NO	NO	NO	0.0357142857142857	0	B	A	-3.42845291082091	-2.14449755380404	-5.32851642399838	0.27606260106863	-1.65711168138542	-0.411106370455734	-5.28470850178806	0.254681734099123	-1.28395535701687	-5.60457902506701
AL1G45810	AT1G31740	OG0013090	BGAL15	protein_coding	beta-galactosidase 15	beta-galactosidase 15	beta-galactosidase 15 (BGAL15)%3B FUNCTIONS IN: beta-galactosidase activity%3B INVOLVED IN: carbohydrate metabolic process%3B LOCATED IN: endomembrane system%3B EXPRESSED IN: 7 plant structures%3B CONTAINS InterPro DOMAIN/s: Glycoside hydrolase%2C family 35%2C conserved site (InterPro:IPR019801)%2C Glycoside hydrolase%2C family 35 (InterPro:IPR001944)%2C D-galactoside/L-rhamnose binding SUEL lect…	Encodes a putative %26beta%3B-galactosidase.	beta-galactosidase 15 (BGAL15)%3B FUNCTIONS IN: beta-galactosidase activity%3B INVOLVED IN: carbohydrate metabolic process%3B LOCATED IN: endomembrane system%3B EXPRESSED IN: 7 plant structures%3B CONTAINS InterPro DOMAIN/s: Glycoside hydrolase%2C family 35%2C conserved site (InterPro:IPR019801)%2C Glycoside hydrolase%2C family 35 (InterPro:IPR001944)%2C D-galactoside/L-rhamnose binding SUEL lect…	scaffold_1	14367378	14371605	4228	-	scaffold_1	14369569	14369775	207	*	0.265322534261656	-0.24286467674698	254.269715655761	0.389732142857143	5.26122490276812	1.54231723018E-4	33.5602	-0.007321429	0.37553571	0.048571429	0.251209677	0.321428571	0.32875	NO	MODERATE	NO	0.0357142857142857	0	B	B	-3.9801916339978	-0.0166072147443495	-3.09098041971301	-0.405076781467527	-2.20885040456231	1.71678396860396	-3.04717249750269	-0.426457648437034	-3.96358441925345	-2.68590363824548
AL1G45810	AT1G31740	OG0013090	BGAL15	protein_coding	beta-galactosidase 15	beta-galactosidase 15	beta-galactosidase 15 (BGAL15)%3B FUNCTIONS IN: beta-galactosidase activity%3B INVOLVED IN: carbohydrate metabolic process%3B LOCATED IN: endomembrane system%3B EXPRESSED IN: 7 plant structures%3B CONTAINS InterPro DOMAIN/s: Glycoside hydrolase%2C family 35%2C conserved site (InterPro:IPR019801)%2C Glycoside hydrolase%2C family 35 (InterPro:IPR001944)%2C D-galactoside/L-rhamnose binding SUEL lect…	Encodes a putative %26beta%3B-galactosidase.	beta-galactosidase 15 (BGAL15)%3B FUNCTIONS IN: beta-galactosidase activity%3B INVOLVED IN: carbohydrate metabolic process%3B LOCATED IN: endomembrane system%3B EXPRESSED IN: 7 plant structures%3B CONTAINS InterPro DOMAIN/s: Glycoside hydrolase%2C family 35%2C conserved site (InterPro:IPR019801)%2C Glycoside hydrolase%2C family 35 (InterPro:IPR001944)%2C D-galactoside/L-rhamnose binding SUEL lect…	scaffold_1	14367378	14371605	4228	-	scaffold_1	14370971	14371335	365	*	0.254224133092449	-0.202470784954765	138.880760877981	0.298214285714286	5.11467624489292	6.3294734388E-5	13.9568	0.08535714	0.29785714	0.047089947	0.123387097	0.232857143	0.1475	NO	NO	NO	0.0357142857142857	0	B	A	-4.47938381211023	-2.23033601758778	-2.62016883260441	0.929456998572753	-2.70804258267474	-0.496944834239474	-2.57636091039409	0.908076131603246	-2.24904779452245	-3.54962583117716
AL1G45810	AT1G31740	OG0013090	BGAL15	protein_coding	beta-galactosidase 15	beta-galactosidase 15	beta-galactosidase 15 (BGAL15)%3B FUNCTIONS IN: beta-galactosidase activity%3B INVOLVED IN: carbohydrate metabolic process%3B LOCATED IN: endomembrane system%3B EXPRESSED IN: 7 plant structures%3B CONTAINS InterPro DOMAIN/s: Glycoside hydrolase%2C family 35%2C conserved site (InterPro:IPR019801)%2C Glycoside hydrolase%2C family 35 (InterPro:IPR001944)%2C D-galactoside/L-rhamnose binding SUEL lect…	Encodes a putative %26beta%3B-galactosidase.	beta-galactosidase 15 (BGAL15)%3B FUNCTIONS IN: beta-galactosidase activity%3B INVOLVED IN: carbohydrate metabolic process%3B LOCATED IN: endomembrane system%3B EXPRESSED IN: 7 plant structures%3B CONTAINS InterPro DOMAIN/s: Glycoside hydrolase%2C family 35%2C conserved site (InterPro:IPR019801)%2C Glycoside hydrolase%2C family 35 (InterPro:IPR001944)%2C D-galactoside/L-rhamnose binding SUEL lect…	scaffold_1	14367378	14371605	4228	-	scaffold_1	14370971	14371335	365	*	0.254224133092449	-0.202470784954765	138.880760877981	0.298214285714286	5.11467624489292	6.3294734388E-5	13.9568	0.08535714	0.29785714	0.047089947	0.123387097	0.232857143	0.1475	NO	NO	NO	0.0357142857142857	0	B	A	-4.47938381211023	-2.23033601758778	-2.62016883260441	0.929456998572753	-2.70804258267474	-0.496944834239474	-2.57636091039409	0.908076131603246	-2.24904779452245	-3.54962583117716
AL1G45810	AT1G31740	OG0013090	BGAL15	protein_coding	beta-galactosidase 15	beta-galactosidase 15	beta-galactosidase 15 (BGAL15)%3B FUNCTIONS IN: beta-galactosidase activity%3B INVOLVED IN: carbohydrate metabolic process%3B LOCATED IN: endomembrane system%3B EXPRESSED IN: 7 plant structures%3B CONTAINS InterPro DOMAIN/s: Glycoside hydrolase%2C family 35%2C conserved site (InterPro:IPR019801)%2C Glycoside hydrolase%2C family 35 (InterPro:IPR001944)%2C D-galactoside/L-rhamnose binding SUEL lect…	Encodes a putative %26beta%3B-galactosidase.	beta-galactosidase 15 (BGAL15)%3B FUNCTIONS IN: beta-galactosidase activity%3B INVOLVED IN: carbohydrate metabolic process%3B LOCATED IN: endomembrane system%3B EXPRESSED IN: 7 plant structures%3B CONTAINS InterPro DOMAIN/s: Glycoside hydrolase%2C family 35%2C conserved site (InterPro:IPR019801)%2C Glycoside hydrolase%2C family 35 (InterPro:IPR001944)%2C D-galactoside/L-rhamnose binding SUEL lect…	scaffold_1	14367378	14371605	4228	-	scaffold_1	14370045	14370396	352	*	0.393432834523106	-0.286044946591539	274.26695298465	0.50375	7.63357194810184	6.3294734388E-5	32.0317	0.04928571	0.48357143	0.066031746	0.216774194	0.414285714	0.365	NO	NO	NO	0.0357142857142857	0	B	A	-3.1798673322467	-2.5767017486449	-7.89042429097395	-0.0110979940128077	-1.40852610281121	-0.843310565296594	-7.84661636876363	-0.0324788609823146	-0.6031655836018	-7.87932629696114
AL1G45810	AT1G31740	OG0013090	BGAL15	protein_coding	beta-galactosidase 15	beta-galactosidase 15	beta-galactosidase 15 (BGAL15)%3B FUNCTIONS IN: beta-galactosidase activity%3B INVOLVED IN: carbohydrate metabolic process%3B LOCATED IN: endomembrane system%3B EXPRESSED IN: 7 plant structures%3B CONTAINS InterPro DOMAIN/s: Glycoside hydrolase%2C family 35%2C conserved site (InterPro:IPR019801)%2C Glycoside hydrolase%2C family 35 (InterPro:IPR001944)%2C D-galactoside/L-rhamnose binding SUEL lect…	Encodes a putative %26beta%3B-galactosidase.	beta-galactosidase 15 (BGAL15)%3B FUNCTIONS IN: beta-galactosidase activity%3B INVOLVED IN: carbohydrate metabolic process%3B LOCATED IN: endomembrane system%3B EXPRESSED IN: 7 plant structures%3B CONTAINS InterPro DOMAIN/s: Glycoside hydrolase%2C family 35%2C conserved site (InterPro:IPR019801)%2C Glycoside hydrolase%2C family 35 (InterPro:IPR001944)%2C D-galactoside/L-rhamnose binding SUEL lect…	scaffold_1	14367378	14371605	4228	-	scaffold_1	14370045	14370396	352	*	0.393432834523106	-0.286044946591539	274.26695298465	0.50375	7.63357194810184	6.3294734388E-5	32.0317	0.04928571	0.48357143	0.066031746	0.216774194	0.414285714	0.365	NO	MODERATE	NO	0.0357142857142857	0	B	B	-3.1798673322467	-2.5767017486449	-7.89042429097395	-0.0110979940128077	-1.40852610281121	-0.843310565296594	-7.84661636876363	-0.0324788609823146	-0.6031655836018	-7.87932629696114
AL1G45810	AT1G31740	OG0013090	BGAL15	protein_coding	beta-galactosidase 15	beta-galactosidase 15	beta-galactosidase 15 (BGAL15)%3B FUNCTIONS IN: beta-galactosidase activity%3B INVOLVED IN: carbohydrate metabolic process%3B LOCATED IN: endomembrane system%3B EXPRESSED IN: 7 plant structures%3B CONTAINS InterPro DOMAIN/s: Glycoside hydrolase%2C family 35%2C conserved site (InterPro:IPR019801)%2C Glycoside hydrolase%2C family 35 (InterPro:IPR001944)%2C D-galactoside/L-rhamnose binding SUEL lect…	Encodes a putative %26beta%3B-galactosidase.	beta-galactosidase 15 (BGAL15)%3B FUNCTIONS IN: beta-galactosidase activity%3B INVOLVED IN: carbohydrate metabolic process%3B LOCATED IN: endomembrane system%3B EXPRESSED IN: 7 plant structures%3B CONTAINS InterPro DOMAIN/s: Glycoside hydrolase%2C family 35%2C conserved site (InterPro:IPR019801)%2C Glycoside hydrolase%2C family 35 (InterPro:IPR001944)%2C D-galactoside/L-rhamnose binding SUEL lect…	scaffold_1	14367378	14371605	4228	-	scaffold_1	14370416	14370933	518	*	0.473608406080382	-0.308584652025063	276.215430810835	0.554553571428571	8.81797428622996	6.3294734388E-5	29.2843	0.4491071	0.55160714	0.082539683	0.127983871	0.522857143	0.07375	NO	MODERATE	NO	0.0357142857142857	0	B	B	-3.42845291082091	-2.14449755380404	-5.32851642399838	0.27606260106863	-1.65711168138542	-0.411106370455734	-5.28470850178806	0.254681734099123	-1.28395535701687	-5.60457902506701
AL1G45810	AT1G31740	OG0013090	BGAL15	protein_coding	beta-galactosidase 15	beta-galactosidase 15	beta-galactosidase 15 (BGAL15)%3B FUNCTIONS IN: beta-galactosidase activity%3B INVOLVED IN: carbohydrate metabolic process%3B LOCATED IN: endomembrane system%3B EXPRESSED IN: 7 plant structures%3B CONTAINS InterPro DOMAIN/s: Glycoside hydrolase%2C family 35%2C conserved site (InterPro:IPR019801)%2C Glycoside hydrolase%2C family 35 (InterPro:IPR001944)%2C D-galactoside/L-rhamnose binding SUEL lect…	Encodes a putative %26beta%3B-galactosidase.	beta-galactosidase 15 (BGAL15)%3B FUNCTIONS IN: beta-galactosidase activity%3B INVOLVED IN: carbohydrate metabolic process%3B LOCATED IN: endomembrane system%3B EXPRESSED IN: 7 plant structures%3B CONTAINS InterPro DOMAIN/s: Glycoside hydrolase%2C family 35%2C conserved site (InterPro:IPR019801)%2C Glycoside hydrolase%2C family 35 (InterPro:IPR001944)%2C D-galactoside/L-rhamnose binding SUEL lect…	scaffold_1	14367378	14371605	4228	-	scaffold_1	14370416	14370933	518	*	0.473608406080382	-0.308584652025063	276.215430810835	0.554553571428571	8.81797428622996	6.3294734388E-5	29.2843	0.4491071	0.55160714	0.082539683	0.127983871	0.522857143	0.07375	NO	NO	NO	0.0357142857142857	0	B	A	-3.42845291082091	-2.14449755380404	-5.32851642399838	0.27606260106863	-1.65711168138542	-0.411106370455734	-5.28470850178806	0.254681734099123	-1.28395535701687	-5.60457902506701
AL1G45810	AT1G31740	OG0013090	BGAL15	protein_coding	beta-galactosidase 15	beta-galactosidase 15	beta-galactosidase 15 (BGAL15)%3B FUNCTIONS IN: beta-galactosidase activity%3B INVOLVED IN: carbohydrate metabolic process%3B LOCATED IN: endomembrane system%3B EXPRESSED IN: 7 plant structures%3B CONTAINS InterPro DOMAIN/s: Glycoside hydrolase%2C family 35%2C conserved site (InterPro:IPR019801)%2C Glycoside hydrolase%2C family 35 (InterPro:IPR001944)%2C D-galactoside/L-rhamnose binding SUEL lect…	Encodes a putative %26beta%3B-galactosidase.	beta-galactosidase 15 (BGAL15)%3B FUNCTIONS IN: beta-galactosidase activity%3B INVOLVED IN: carbohydrate metabolic process%3B LOCATED IN: endomembrane system%3B EXPRESSED IN: 7 plant structures%3B CONTAINS InterPro DOMAIN/s: Glycoside hydrolase%2C family 35%2C conserved site (InterPro:IPR019801)%2C Glycoside hydrolase%2C family 35 (InterPro:IPR001944)%2C D-galactoside/L-rhamnose binding SUEL lect…	scaffold_1	14367378	14371605	4228	-	scaffold_1	14370045	14370396	352	*	0.393432834523106	-0.286044946591539	274.26695298465	0.50375	7.63357194810184	6.3294734388E-5	32.0317	0.04928571	0.48357143	0.066031746	0.216774194	0.414285714	0.365	NO	NO	NO	0.0357142857142857	0	B	A	-3.1798673322467	-2.5767017486449	-7.89042429097395	-0.0110979940128077	-1.40852610281121	-0.843310565296594	-7.84661636876363	-0.0324788609823146	-0.6031655836018	-7.87932629696114
AL1G45810	AT1G31740	OG0013090	BGAL15	protein_coding	beta-galactosidase 15	beta-galactosidase 15	beta-galactosidase 15 (BGAL15)%3B FUNCTIONS IN: beta-galactosidase activity%3B INVOLVED IN: carbohydrate metabolic process%3B LOCATED IN: endomembrane system%3B EXPRESSED IN: 7 plant structures%3B CONTAINS InterPro DOMAIN/s: Glycoside hydrolase%2C family 35%2C conserved site (InterPro:IPR019801)%2C Glycoside hydrolase%2C family 35 (InterPro:IPR001944)%2C D-galactoside/L-rhamnose binding SUEL lect…	Encodes a putative %26beta%3B-galactosidase.	beta-galactosidase 15 (BGAL15)%3B FUNCTIONS IN: beta-galactosidase activity%3B INVOLVED IN: carbohydrate metabolic process%3B LOCATED IN: endomembrane system%3B EXPRESSED IN: 7 plant structures%3B CONTAINS InterPro DOMAIN/s: Glycoside hydrolase%2C family 35%2C conserved site (InterPro:IPR019801)%2C Glycoside hydrolase%2C family 35 (InterPro:IPR001944)%2C D-galactoside/L-rhamnose binding SUEL lect…	scaffold_1	14367378	14371605	4228	-	scaffold_1	14366811	14367617	807	*	0.23327861728888	-0.183964576093224	153.428193030516	0.288660714285714	4.18180871561279	6.3294734388E-5	28.8421	0.1053571	0.28	0.057671958	0.127903226	0.272857143	0.1675	NO	NO	NO	0.0357142857142857	0	B	A	-3.8104258730203	-1.12347161616605	-3.88458924881915	-0.603453424446486	-2.03908464358481	0.609919567182256	-3.84078132660883	-0.624834291415993	-2.68695425685425	-3.28113582437266
AL1G45810	AT1G31740	OG0013090	BGAL15	protein_coding	beta-galactosidase 15	beta-galactosidase 15	beta-galactosidase 15 (BGAL15)%3B FUNCTIONS IN: beta-galactosidase activity%3B INVOLVED IN: carbohydrate metabolic process%3B LOCATED IN: endomembrane system%3B EXPRESSED IN: 7 plant structures%3B CONTAINS InterPro DOMAIN/s: Glycoside hydrolase%2C family 35%2C conserved site (InterPro:IPR019801)%2C Glycoside hydrolase%2C family 35 (InterPro:IPR001944)%2C D-galactoside/L-rhamnose binding SUEL lect…	Encodes a putative %26beta%3B-galactosidase.	beta-galactosidase 15 (BGAL15)%3B FUNCTIONS IN: beta-galactosidase activity%3B INVOLVED IN: carbohydrate metabolic process%3B LOCATED IN: endomembrane system%3B EXPRESSED IN: 7 plant structures%3B CONTAINS InterPro DOMAIN/s: Glycoside hydrolase%2C family 35%2C conserved site (InterPro:IPR019801)%2C Glycoside hydrolase%2C family 35 (InterPro:IPR001944)%2C D-galactoside/L-rhamnose binding SUEL lect…	scaffold_1	14367378	14371605	4228	-	scaffold_1	14367993	14368296	304	*	0.265943293756498	-0.232629131351406	208.201451150192	0.326875	5.58159586234092	3.73024711695E-5	18.2839	0.06857143	0.32428571	0.028148148	0.148709677	0.388571429	0.32	NO	NO	NO	0.0357142857142857	0	B	A	-4.26111354799629	-1.94270186701424	-4.25777435298216	-0.470277496292785	-2.4897723185608	-0.209310683665934	-4.21396643077184	-0.491658363262292	-2.31841168098205	-3.78749685668938
AL1G45810	AT1G31740	OG0013090	BGAL15	protein_coding	beta-galactosidase 15	beta-galactosidase 15	beta-galactosidase 15 (BGAL15)%3B FUNCTIONS IN: beta-galactosidase activity%3B INVOLVED IN: carbohydrate metabolic process%3B LOCATED IN: endomembrane system%3B EXPRESSED IN: 7 plant structures%3B CONTAINS InterPro DOMAIN/s: Glycoside hydrolase%2C family 35%2C conserved site (InterPro:IPR019801)%2C Glycoside hydrolase%2C family 35 (InterPro:IPR001944)%2C D-galactoside/L-rhamnose binding SUEL lect…	Encodes a putative %26beta%3B-galactosidase.	beta-galactosidase 15 (BGAL15)%3B FUNCTIONS IN: beta-galactosidase activity%3B INVOLVED IN: carbohydrate metabolic process%3B LOCATED IN: endomembrane system%3B EXPRESSED IN: 7 plant structures%3B CONTAINS InterPro DOMAIN/s: Glycoside hydrolase%2C family 35%2C conserved site (InterPro:IPR019801)%2C Glycoside hydrolase%2C family 35 (InterPro:IPR001944)%2C D-galactoside/L-rhamnose binding SUEL lect…	scaffold_1	14367378	14371605	4228	-	scaffold_1	14369569	14369775	207	*	0.265322534261656	-0.24286467674698	254.269715655761	0.389732142857143	5.26122490276812	1.54231723018E-4	33.5602	-0.007321429	0.37553571	0.048571429	0.251209677	0.321428571	0.32875	NO	NO	NO	0.0357142857142857	0	B	A	-3.9801916339978	-0.0166072147443495	-3.09098041971301	-0.405076781467527	-2.20885040456231	1.71678396860396	-3.04717249750269	-0.426457648437034	-3.96358441925345	-2.68590363824548
AL1G45810	AT1G31740	OG0013090	BGAL15	protein_coding	beta-galactosidase 15	beta-galactosidase 15	beta-galactosidase 15 (BGAL15)%3B FUNCTIONS IN: beta-galactosidase activity%3B INVOLVED IN: carbohydrate metabolic process%3B LOCATED IN: endomembrane system%3B EXPRESSED IN: 7 plant structures%3B CONTAINS InterPro DOMAIN/s: Glycoside hydrolase%2C family 35%2C conserved site (InterPro:IPR019801)%2C Glycoside hydrolase%2C family 35 (InterPro:IPR001944)%2C D-galactoside/L-rhamnose binding SUEL lect…	Encodes a putative %26beta%3B-galactosidase.	beta-galactosidase 15 (BGAL15)%3B FUNCTIONS IN: beta-galactosidase activity%3B INVOLVED IN: carbohydrate metabolic process%3B LOCATED IN: endomembrane system%3B EXPRESSED IN: 7 plant structures%3B CONTAINS InterPro DOMAIN/s: Glycoside hydrolase%2C family 35%2C conserved site (InterPro:IPR019801)%2C Glycoside hydrolase%2C family 35 (InterPro:IPR001944)%2C D-galactoside/L-rhamnose binding SUEL lect…	scaffold_1	14367378	14371605	4228	-	scaffold_1	14370416	14370933	518	*	0.473608406080382	-0.308584652025063	276.215430810835	0.554553571428571	8.81797428622996	6.3294734388E-5	29.2843	0.4491071	0.55160714	0.082539683	0.127983871	0.522857143	0.07375	NO	NO	NO	0.0357142857142857	0	B	A	-3.42845291082091	-2.14449755380404	-5.32851642399838	0.27606260106863	-1.65711168138542	-0.411106370455734	-5.28470850178806	0.254681734099123	-1.28395535701687	-5.60457902506701
AL1G45810	AT1G31740	OG0013090	BGAL15	protein_coding	beta-galactosidase 15	beta-galactosidase 15	beta-galactosidase 15 (BGAL15)%3B FUNCTIONS IN: beta-galactosidase activity%3B INVOLVED IN: carbohydrate metabolic process%3B LOCATED IN: endomembrane system%3B EXPRESSED IN: 7 plant structures%3B CONTAINS InterPro DOMAIN/s: Glycoside hydrolase%2C family 35%2C conserved site (InterPro:IPR019801)%2C Glycoside hydrolase%2C family 35 (InterPro:IPR001944)%2C D-galactoside/L-rhamnose binding SUEL lect…	Encodes a putative %26beta%3B-galactosidase.	beta-galactosidase 15 (BGAL15)%3B FUNCTIONS IN: beta-galactosidase activity%3B INVOLVED IN: carbohydrate metabolic process%3B LOCATED IN: endomembrane system%3B EXPRESSED IN: 7 plant structures%3B CONTAINS InterPro DOMAIN/s: Glycoside hydrolase%2C family 35%2C conserved site (InterPro:IPR019801)%2C Glycoside hydrolase%2C family 35 (InterPro:IPR001944)%2C D-galactoside/L-rhamnose binding SUEL lect…	scaffold_1	14367378	14371605	4228	-	scaffold_1	14368754	14369235	482	*	0.279925284381509	-0.224603925099891	175.48409568149	0.340178571428571	5.57124222585387	6.34145154821E-6	28.9067	-0.06321429	0.33464286	0.044232804	0.141774194	0.234285714	0.2975	NO	NO	NO	0.0357142857142857	0	B	A	-4.09336880798281	-1.13100130597165	-3.66414235184522	0.43282176649955	-2.32202757854732	0.602389877376656	-3.6203344296349	0.411440899530043	-2.96236750201116	-4.09696411834477
AL1G45810	AT1G31740	OG0013090	BGAL15	protein_coding	beta-galactosidase 15	beta-galactosidase 15	beta-galactosidase 15 (BGAL15)%3B FUNCTIONS IN: beta-galactosidase activity%3B INVOLVED IN: carbohydrate metabolic process%3B LOCATED IN: endomembrane system%3B EXPRESSED IN: 7 plant structures%3B CONTAINS InterPro DOMAIN/s: Glycoside hydrolase%2C family 35%2C conserved site (InterPro:IPR019801)%2C Glycoside hydrolase%2C family 35 (InterPro:IPR001944)%2C D-galactoside/L-rhamnose binding SUEL lect…	Encodes a putative %26beta%3B-galactosidase.	beta-galactosidase 15 (BGAL15)%3B FUNCTIONS IN: beta-galactosidase activity%3B INVOLVED IN: carbohydrate metabolic process%3B LOCATED IN: endomembrane system%3B EXPRESSED IN: 7 plant structures%3B CONTAINS InterPro DOMAIN/s: Glycoside hydrolase%2C family 35%2C conserved site (InterPro:IPR019801)%2C Glycoside hydrolase%2C family 35 (InterPro:IPR001944)%2C D-galactoside/L-rhamnose binding SUEL lect…	scaffold_1	14367378	14371605	4228	-	scaffold_1	14368754	14369235	482	*	0.279925284381509	-0.224603925099891	175.48409568149	0.340178571428571	5.57124222585387	6.34145154821E-6	28.9067	-0.06321429	0.33464286	0.044232804	0.141774194	0.234285714	0.2975	NO	NO	NO	0.0357142857142857	0	B	A	-4.09336880798281	-1.13100130597165	-3.66414235184522	0.43282176649955	-2.32202757854732	0.602389877376656	-3.6203344296349	0.411440899530043	-2.96236750201116	-4.09696411834477
AL1G45810	AT1G31740	OG0013090	BGAL15	protein_coding	beta-galactosidase 15	beta-galactosidase 15	beta-galactosidase 15 (BGAL15)%3B FUNCTIONS IN: beta-galactosidase activity%3B INVOLVED IN: carbohydrate metabolic process%3B LOCATED IN: endomembrane system%3B EXPRESSED IN: 7 plant structures%3B CONTAINS InterPro DOMAIN/s: Glycoside hydrolase%2C family 35%2C conserved site (InterPro:IPR019801)%2C Glycoside hydrolase%2C family 35 (InterPro:IPR001944)%2C D-galactoside/L-rhamnose binding SUEL lect…	Encodes a putative %26beta%3B-galactosidase.	beta-galactosidase 15 (BGAL15)%3B FUNCTIONS IN: beta-galactosidase activity%3B INVOLVED IN: carbohydrate metabolic process%3B LOCATED IN: endomembrane system%3B EXPRESSED IN: 7 plant structures%3B CONTAINS InterPro DOMAIN/s: Glycoside hydrolase%2C family 35%2C conserved site (InterPro:IPR019801)%2C Glycoside hydrolase%2C family 35 (InterPro:IPR001944)%2C D-galactoside/L-rhamnose binding SUEL lect…	scaffold_1	14367378	14371605	4228	-	scaffold_1	14368302	14368751	450	*	0.234734963815647	-0.206784139478981	185.696610962893	0.309732142857143	4.86560340140926	8.56148212078E-5	32.934	-0.05928571	0.29857143	0.042433862	0.151290323	0.275714286	0.335	NO	NO	NO	0.0357142857142857	0	B	A	-4.01252796942209	-1.29816041965575	-2.89572745382181	-2.80640523598908	-2.2411867399866	0.435230763692556	-2.85191953161149	-2.82778610295859	-2.71436754976634	-0.0893222178327298
AL1G45810	AT1G31740	OG0013090	BGAL15	protein_coding	beta-galactosidase 15	beta-galactosidase 15	beta-galactosidase 15 (BGAL15)%3B FUNCTIONS IN: beta-galactosidase activity%3B INVOLVED IN: carbohydrate metabolic process%3B LOCATED IN: endomembrane system%3B EXPRESSED IN: 7 plant structures%3B CONTAINS InterPro DOMAIN/s: Glycoside hydrolase%2C family 35%2C conserved site (InterPro:IPR019801)%2C Glycoside hydrolase%2C family 35 (InterPro:IPR001944)%2C D-galactoside/L-rhamnose binding SUEL lect…	Encodes a putative %26beta%3B-galactosidase.	beta-galactosidase 15 (BGAL15)%3B FUNCTIONS IN: beta-galactosidase activity%3B INVOLVED IN: carbohydrate metabolic process%3B LOCATED IN: endomembrane system%3B EXPRESSED IN: 7 plant structures%3B CONTAINS InterPro DOMAIN/s: Glycoside hydrolase%2C family 35%2C conserved site (InterPro:IPR019801)%2C Glycoside hydrolase%2C family 35 (InterPro:IPR001944)%2C D-galactoside/L-rhamnose binding SUEL lect…	scaffold_1	14367378	14371605	4228	-	scaffold_1	14369237	14369528	292	*	0.292694877607761	-0.247694042321188	195.536092883937	0.382410714285714	5.62981288237915	3.73024711695E-5	26.6172	0.1842857	0.37071429	0.03978836	0.226935484	0.354285714	0.17	NO	NO	NO	0.0357142857142857	0	B	A	-4.20250394003978	0.314699136701604	-4.27824442198688	-0.721369610832583	-2.43116271060429	2.04809032004991	-4.23443649977656	-0.74275047780209	-4.51720307674138	-3.5568748111543
AL1G45810	AT1G31740	OG0013090	BGAL15	protein_coding	beta-galactosidase 15	beta-galactosidase 15	beta-galactosidase 15 (BGAL15)%3B FUNCTIONS IN: beta-galactosidase activity%3B INVOLVED IN: carbohydrate metabolic process%3B LOCATED IN: endomembrane system%3B EXPRESSED IN: 7 plant structures%3B CONTAINS InterPro DOMAIN/s: Glycoside hydrolase%2C family 35%2C conserved site (InterPro:IPR019801)%2C Glycoside hydrolase%2C family 35 (InterPro:IPR001944)%2C D-galactoside/L-rhamnose binding SUEL lect…	Encodes a putative %26beta%3B-galactosidase.	beta-galactosidase 15 (BGAL15)%3B FUNCTIONS IN: beta-galactosidase activity%3B INVOLVED IN: carbohydrate metabolic process%3B LOCATED IN: endomembrane system%3B EXPRESSED IN: 7 plant structures%3B CONTAINS InterPro DOMAIN/s: Glycoside hydrolase%2C family 35%2C conserved site (InterPro:IPR019801)%2C Glycoside hydrolase%2C family 35 (InterPro:IPR001944)%2C D-galactoside/L-rhamnose binding SUEL lect…	scaffold_1	14367378	14371605	4228	-	scaffold_1	14369569	14369775	207	*	0.265322534261656	-0.24286467674698	254.269715655761	0.389732142857143	5.26122490276812	1.54231723018E-4	33.5602	-0.007321429	0.37553571	0.048571429	0.251209677	0.321428571	0.32875	NO	NO	NO	0.0357142857142857	0	B	A	-3.9801916339978	-0.0166072147443495	-3.09098041971301	-0.405076781467527	-2.20885040456231	1.71678396860396	-3.04717249750269	-0.426457648437034	-3.96358441925345	-2.68590363824548
AL1G45810	AT1G31740	OG0013090	BGAL15	protein_coding	beta-galactosidase 15	beta-galactosidase 15	beta-galactosidase 15 (BGAL15)%3B FUNCTIONS IN: beta-galactosidase activity%3B INVOLVED IN: carbohydrate metabolic process%3B LOCATED IN: endomembrane system%3B EXPRESSED IN: 7 plant structures%3B CONTAINS InterPro DOMAIN/s: Glycoside hydrolase%2C family 35%2C conserved site (InterPro:IPR019801)%2C Glycoside hydrolase%2C family 35 (InterPro:IPR001944)%2C D-galactoside/L-rhamnose binding SUEL lect…	Encodes a putative %26beta%3B-galactosidase.	beta-galactosidase 15 (BGAL15)%3B FUNCTIONS IN: beta-galactosidase activity%3B INVOLVED IN: carbohydrate metabolic process%3B LOCATED IN: endomembrane system%3B EXPRESSED IN: 7 plant structures%3B CONTAINS InterPro DOMAIN/s: Glycoside hydrolase%2C family 35%2C conserved site (InterPro:IPR019801)%2C Glycoside hydrolase%2C family 35 (InterPro:IPR001944)%2C D-galactoside/L-rhamnose binding SUEL lect…	scaffold_1	14367378	14371605	4228	-	scaffold_1	14369569	14369775	207	*	0.265322534261656	-0.24286467674698	254.269715655761	0.389732142857143	5.26122490276812	1.54231723018E-4	33.5602	-0.007321429	0.37553571	0.048571429	0.251209677	0.321428571	0.32875	NO	NO	NO	0.0357142857142857	0	B	A	-3.9801916339978	-0.0166072147443495	-3.09098041971301	-0.405076781467527	-2.20885040456231	1.71678396860396	-3.04717249750269	-0.426457648437034	-3.96358441925345	-2.68590363824548
AL1G45810	AT1G31740	OG0013090	BGAL15	protein_coding	beta-galactosidase 15	beta-galactosidase 15	beta-galactosidase 15 (BGAL15)%3B FUNCTIONS IN: beta-galactosidase activity%3B INVOLVED IN: carbohydrate metabolic process%3B LOCATED IN: endomembrane system%3B EXPRESSED IN: 7 plant structures%3B CONTAINS InterPro DOMAIN/s: Glycoside hydrolase%2C family 35%2C conserved site (InterPro:IPR019801)%2C Glycoside hydrolase%2C family 35 (InterPro:IPR001944)%2C D-galactoside/L-rhamnose binding SUEL lect…	Encodes a putative %26beta%3B-galactosidase.	beta-galactosidase 15 (BGAL15)%3B FUNCTIONS IN: beta-galactosidase activity%3B INVOLVED IN: carbohydrate metabolic process%3B LOCATED IN: endomembrane system%3B EXPRESSED IN: 7 plant structures%3B CONTAINS InterPro DOMAIN/s: Glycoside hydrolase%2C family 35%2C conserved site (InterPro:IPR019801)%2C Glycoside hydrolase%2C family 35 (InterPro:IPR001944)%2C D-galactoside/L-rhamnose binding SUEL lect…	scaffold_1	14367378	14371605	4228	-	scaffold_1	14369237	14369528	292	*	0.292694877607761	-0.247694042321188	195.536092883937	0.382410714285714	5.62981288237915	3.73024711695E-5	26.6172	0.1842857	0.37071429	0.03978836	0.226935484	0.354285714	0.17	NO	NO	NO	0.0357142857142857	0	B	A	-4.20250394003978	0.314699136701604	-4.27824442198688	-0.721369610832583	-2.43116271060429	2.04809032004991	-4.23443649977656	-0.74275047780209	-4.51720307674138	-3.5568748111543
AL1G45810	AT1G31740	OG0013090	BGAL15	protein_coding	beta-galactosidase 15	beta-galactosidase 15	beta-galactosidase 15 (BGAL15)%3B FUNCTIONS IN: beta-galactosidase activity%3B INVOLVED IN: carbohydrate metabolic process%3B LOCATED IN: endomembrane system%3B EXPRESSED IN: 7 plant structures%3B CONTAINS InterPro DOMAIN/s: Glycoside hydrolase%2C family 35%2C conserved site (InterPro:IPR019801)%2C Glycoside hydrolase%2C family 35 (InterPro:IPR001944)%2C D-galactoside/L-rhamnose binding SUEL lect…	Encodes a putative %26beta%3B-galactosidase.	beta-galactosidase 15 (BGAL15)%3B FUNCTIONS IN: beta-galactosidase activity%3B INVOLVED IN: carbohydrate metabolic process%3B LOCATED IN: endomembrane system%3B EXPRESSED IN: 7 plant structures%3B CONTAINS InterPro DOMAIN/s: Glycoside hydrolase%2C family 35%2C conserved site (InterPro:IPR019801)%2C Glycoside hydrolase%2C family 35 (InterPro:IPR001944)%2C D-galactoside/L-rhamnose binding SUEL lect…	scaffold_1	14367378	14371605	4228	-	scaffold_1	14370045	14370396	352	*	0.393432834523106	-0.286044946591539	274.26695298465	0.50375	7.63357194810184	6.3294734388E-5	32.0317	0.04928571	0.48357143	0.066031746	0.216774194	0.414285714	0.365	NO	NO	NO	0.0357142857142857	0	B	A	-3.1798673322467	-2.5767017486449	-7.89042429097395	-0.0110979940128077	-1.40852610281121	-0.843310565296594	-7.84661636876363	-0.0324788609823146	-0.6031655836018	-7.87932629696114
AL1G45810	AT1G31740	OG0013090	BGAL15	protein_coding	beta-galactosidase 15	beta-galactosidase 15	beta-galactosidase 15 (BGAL15)%3B FUNCTIONS IN: beta-galactosidase activity%3B INVOLVED IN: carbohydrate metabolic process%3B LOCATED IN: endomembrane system%3B EXPRESSED IN: 7 plant structures%3B CONTAINS InterPro DOMAIN/s: Glycoside hydrolase%2C family 35%2C conserved site (InterPro:IPR019801)%2C Glycoside hydrolase%2C family 35 (InterPro:IPR001944)%2C D-galactoside/L-rhamnose binding SUEL lect…	Encodes a putative %26beta%3B-galactosidase.	beta-galactosidase 15 (BGAL15)%3B FUNCTIONS IN: beta-galactosidase activity%3B INVOLVED IN: carbohydrate metabolic process%3B LOCATED IN: endomembrane system%3B EXPRESSED IN: 7 plant structures%3B CONTAINS InterPro DOMAIN/s: Glycoside hydrolase%2C family 35%2C conserved site (InterPro:IPR019801)%2C Glycoside hydrolase%2C family 35 (InterPro:IPR001944)%2C D-galactoside/L-rhamnose binding SUEL lect…	scaffold_1	14367378	14371605	4228	-	scaffold_1	14366811	14367617	807	*	0.23327861728888	-0.183964576093224	153.428193030516	0.288660714285714	4.18180871561279	6.3294734388E-5	28.8421	0.1053571	0.28	0.057671958	0.127903226	0.272857143	0.1675	NO	NO	NO	0.0357142857142857	0	B	A	-3.8104258730203	-1.12347161616605	-3.88458924881915	-0.603453424446486	-2.03908464358481	0.609919567182256	-3.84078132660883	-0.624834291415993	-2.68695425685425	-3.28113582437266
AL1G45810	AT1G31740	OG0013090	BGAL15	protein_coding	beta-galactosidase 15	beta-galactosidase 15	beta-galactosidase 15 (BGAL15)%3B FUNCTIONS IN: beta-galactosidase activity%3B INVOLVED IN: carbohydrate metabolic process%3B LOCATED IN: endomembrane system%3B EXPRESSED IN: 7 plant structures%3B CONTAINS InterPro DOMAIN/s: Glycoside hydrolase%2C family 35%2C conserved site (InterPro:IPR019801)%2C Glycoside hydrolase%2C family 35 (InterPro:IPR001944)%2C D-galactoside/L-rhamnose binding SUEL lect…	Encodes a putative %26beta%3B-galactosidase.	beta-galactosidase 15 (BGAL15)%3B FUNCTIONS IN: beta-galactosidase activity%3B INVOLVED IN: carbohydrate metabolic process%3B LOCATED IN: endomembrane system%3B EXPRESSED IN: 7 plant structures%3B CONTAINS InterPro DOMAIN/s: Glycoside hydrolase%2C family 35%2C conserved site (InterPro:IPR019801)%2C Glycoside hydrolase%2C family 35 (InterPro:IPR001944)%2C D-galactoside/L-rhamnose binding SUEL lect…	scaffold_1	14367378	14371605	4228	-	scaffold_1	14369237	14369528	292	*	0.292694877607761	-0.247694042321188	195.536092883937	0.382410714285714	5.62981288237915	3.73024711695E-5	26.6172	0.1842857	0.37071429	0.03978836	0.226935484	0.354285714	0.17	NO	NO	NO	0.0357142857142857	0	B	A	-4.20250394003978	0.314699136701604	-4.27824442198688	-0.721369610832583	-2.43116271060429	2.04809032004991	-4.23443649977656	-0.74275047780209	-4.51720307674138	-3.5568748111543
AL1G45810	AT1G31740	OG0013090	BGAL15	protein_coding	beta-galactosidase 15	beta-galactosidase 15	beta-galactosidase 15 (BGAL15)%3B FUNCTIONS IN: beta-galactosidase activity%3B INVOLVED IN: carbohydrate metabolic process%3B LOCATED IN: endomembrane system%3B EXPRESSED IN: 7 plant structures%3B CONTAINS InterPro DOMAIN/s: Glycoside hydrolase%2C family 35%2C conserved site (InterPro:IPR019801)%2C Glycoside hydrolase%2C family 35 (InterPro:IPR001944)%2C D-galactoside/L-rhamnose binding SUEL lect…	Encodes a putative %26beta%3B-galactosidase.	beta-galactosidase 15 (BGAL15)%3B FUNCTIONS IN: beta-galactosidase activity%3B INVOLVED IN: carbohydrate metabolic process%3B LOCATED IN: endomembrane system%3B EXPRESSED IN: 7 plant structures%3B CONTAINS InterPro DOMAIN/s: Glycoside hydrolase%2C family 35%2C conserved site (InterPro:IPR019801)%2C Glycoside hydrolase%2C family 35 (InterPro:IPR001944)%2C D-galactoside/L-rhamnose binding SUEL lect…	scaffold_1	14367378	14371605	4228	-	scaffold_1	14368754	14369235	482	*	0.279925284381509	-0.224603925099891	175.48409568149	0.340178571428571	5.57124222585387	6.34145154821E-6	28.9067	-0.06321429	0.33464286	0.044232804	0.141774194	0.234285714	0.2975	NO	NO	NO	0.0357142857142857	0	B	A	-4.09336880798281	-1.13100130597165	-3.66414235184522	0.43282176649955	-2.32202757854732	0.602389877376656	-3.6203344296349	0.411440899530043	-2.96236750201116	-4.09696411834477
AL1G45810	AT1G31740	OG0013090	BGAL15	protein_coding	beta-galactosidase 15	beta-galactosidase 15	beta-galactosidase 15 (BGAL15)%3B FUNCTIONS IN: beta-galactosidase activity%3B INVOLVED IN: carbohydrate metabolic process%3B LOCATED IN: endomembrane system%3B EXPRESSED IN: 7 plant structures%3B CONTAINS InterPro DOMAIN/s: Glycoside hydrolase%2C family 35%2C conserved site (InterPro:IPR019801)%2C Glycoside hydrolase%2C family 35 (InterPro:IPR001944)%2C D-galactoside/L-rhamnose binding SUEL lect…	Encodes a putative %26beta%3B-galactosidase.	beta-galactosidase 15 (BGAL15)%3B FUNCTIONS IN: beta-galactosidase activity%3B INVOLVED IN: carbohydrate metabolic process%3B LOCATED IN: endomembrane system%3B EXPRESSED IN: 7 plant structures%3B CONTAINS InterPro DOMAIN/s: Glycoside hydrolase%2C family 35%2C conserved site (InterPro:IPR019801)%2C Glycoside hydrolase%2C family 35 (InterPro:IPR001944)%2C D-galactoside/L-rhamnose binding SUEL lect…	scaffold_1	14367378	14371605	4228	-	scaffold_1	14367620	14367992	373	*	0.226140076149187	-0.208315890428926	166.917146256082	0.311071428571429	4.26524758439098	3.47844308701E-4	20.0999	-0.1378571	0.30142857	0.042433862	0.197741935	0.167142857	0.305	NO	NO	NO	0.0357142857142857	0	B	A	-4.14793637401129	-1.19575663829973	-1.39196469232109	-1.73544881375301	-2.3765951445758	0.537634545048576	-1.34815677011077	-1.75682968072252	-2.95217973571156	0.34348412143192
AL1G45810	AT1G31740	OG0013090	BGAL15	protein_coding	beta-galactosidase 15	beta-galactosidase 15	beta-galactosidase 15 (BGAL15)%3B FUNCTIONS IN: beta-galactosidase activity%3B INVOLVED IN: carbohydrate metabolic process%3B LOCATED IN: endomembrane system%3B EXPRESSED IN: 7 plant structures%3B CONTAINS InterPro DOMAIN/s: Glycoside hydrolase%2C family 35%2C conserved site (InterPro:IPR019801)%2C Glycoside hydrolase%2C family 35 (InterPro:IPR001944)%2C D-galactoside/L-rhamnose binding SUEL lect…	Encodes a putative %26beta%3B-galactosidase.	beta-galactosidase 15 (BGAL15)%3B FUNCTIONS IN: beta-galactosidase activity%3B INVOLVED IN: carbohydrate metabolic process%3B LOCATED IN: endomembrane system%3B EXPRESSED IN: 7 plant structures%3B CONTAINS InterPro DOMAIN/s: Glycoside hydrolase%2C family 35%2C conserved site (InterPro:IPR019801)%2C Glycoside hydrolase%2C family 35 (InterPro:IPR001944)%2C D-galactoside/L-rhamnose binding SUEL lect…	scaffold_1	14367378	14371605	4228	-	scaffold_1	14367993	14368296	304	*	0.265943293756498	-0.232629131351406	208.201451150192	0.326875	5.58159586234092	3.73024711695E-5	18.2839	0.06857143	0.32428571	0.028148148	0.148709677	0.388571429	0.32	NO	NO	NO	0.0357142857142857	0	B	A	-4.26111354799629	-1.94270186701424	-4.25777435298216	-0.470277496292785	-2.4897723185608	-0.209310683665934	-4.21396643077184	-0.491658363262292	-2.31841168098205	-3.78749685668938
AL1G45810	AT1G31740	OG0013090	BGAL15	protein_coding	beta-galactosidase 15	beta-galactosidase 15	beta-galactosidase 15 (BGAL15)%3B FUNCTIONS IN: beta-galactosidase activity%3B INVOLVED IN: carbohydrate metabolic process%3B LOCATED IN: endomembrane system%3B EXPRESSED IN: 7 plant structures%3B CONTAINS InterPro DOMAIN/s: Glycoside hydrolase%2C family 35%2C conserved site (InterPro:IPR019801)%2C Glycoside hydrolase%2C family 35 (InterPro:IPR001944)%2C D-galactoside/L-rhamnose binding SUEL lect…	Encodes a putative %26beta%3B-galactosidase.	beta-galactosidase 15 (BGAL15)%3B FUNCTIONS IN: beta-galactosidase activity%3B INVOLVED IN: carbohydrate metabolic process%3B LOCATED IN: endomembrane system%3B EXPRESSED IN: 7 plant structures%3B CONTAINS InterPro DOMAIN/s: Glycoside hydrolase%2C family 35%2C conserved site (InterPro:IPR019801)%2C Glycoside hydrolase%2C family 35 (InterPro:IPR001944)%2C D-galactoside/L-rhamnose binding SUEL lect…	scaffold_1	14367378	14371605	4228	-	scaffold_1	14371340	14375044	3705	*	0.197888314750237	-0.193483255845797	123.160605027823	0.229107142857143	3.84729229969564	6.3294734388E-5	5.7847	0.07660714	0.22910714	0.014074074	0.139758065	0.152857143	0.07625	NO	NO	NO	0.0357142857142857	0	B	A	-4.38237480583737	-2.90047841028526	-1.9273357278292	0.689462878045761	-2.61103357640188	-1.16708722693695	-1.88352780561888	0.668082011076254	-1.48189639555211	-2.61679860587496
AL1G45810	AT1G31740	OG0013090	BGAL15	protein_coding	beta-galactosidase 15	beta-galactosidase 15	beta-galactosidase 15 (BGAL15)%3B FUNCTIONS IN: beta-galactosidase activity%3B INVOLVED IN: carbohydrate metabolic process%3B LOCATED IN: endomembrane system%3B EXPRESSED IN: 7 plant structures%3B CONTAINS InterPro DOMAIN/s: Glycoside hydrolase%2C family 35%2C conserved site (InterPro:IPR019801)%2C Glycoside hydrolase%2C family 35 (InterPro:IPR001944)%2C D-galactoside/L-rhamnose binding SUEL lect…	Encodes a putative %26beta%3B-galactosidase.	beta-galactosidase 15 (BGAL15)%3B FUNCTIONS IN: beta-galactosidase activity%3B INVOLVED IN: carbohydrate metabolic process%3B LOCATED IN: endomembrane system%3B EXPRESSED IN: 7 plant structures%3B CONTAINS InterPro DOMAIN/s: Glycoside hydrolase%2C family 35%2C conserved site (InterPro:IPR019801)%2C Glycoside hydrolase%2C family 35 (InterPro:IPR001944)%2C D-galactoside/L-rhamnose binding SUEL lect…	scaffold_1	14367378	14371605	4228	-	scaffold_1	14368302	14368751	450	*	0.234734963815647	-0.206784139478981	185.696610962893	0.309732142857143	4.86560340140926	8.56148212078E-5	32.934	-0.05928571	0.29857143	0.042433862	0.151290323	0.275714286	0.335	NO	NO	NO	0.0357142857142857	0	B	A	-4.01252796942209	-1.29816041965575	-2.89572745382181	-2.80640523598908	-2.2411867399866	0.435230763692556	-2.85191953161149	-2.82778610295859	-2.71436754976634	-0.0893222178327298
AL1G45810	AT1G31740	OG0013090	BGAL15	protein_coding	beta-galactosidase 15	beta-galactosidase 15	beta-galactosidase 15 (BGAL15)%3B FUNCTIONS IN: beta-galactosidase activity%3B INVOLVED IN: carbohydrate metabolic process%3B LOCATED IN: endomembrane system%3B EXPRESSED IN: 7 plant structures%3B CONTAINS InterPro DOMAIN/s: Glycoside hydrolase%2C family 35%2C conserved site (InterPro:IPR019801)%2C Glycoside hydrolase%2C family 35 (InterPro:IPR001944)%2C D-galactoside/L-rhamnose binding SUEL lect…	Encodes a putative %26beta%3B-galactosidase.	beta-galactosidase 15 (BGAL15)%3B FUNCTIONS IN: beta-galactosidase activity%3B INVOLVED IN: carbohydrate metabolic process%3B LOCATED IN: endomembrane system%3B EXPRESSED IN: 7 plant structures%3B CONTAINS InterPro DOMAIN/s: Glycoside hydrolase%2C family 35%2C conserved site (InterPro:IPR019801)%2C Glycoside hydrolase%2C family 35 (InterPro:IPR001944)%2C D-galactoside/L-rhamnose binding SUEL lect…	scaffold_1	14367378	14371605	4228	-	scaffold_1	14367620	14367992	373	*	0.226140076149187	-0.208315890428926	166.917146256082	0.311071428571429	4.26524758439098	3.47844308701E-4	20.0999	-0.1378571	0.30142857	0.042433862	0.197741935	0.167142857	0.305	NO	NO	NO	0.0357142857142857	0	B	A	-4.14793637401129	-1.19575663829973	-1.39196469232109	-1.73544881375301	-2.3765951445758	0.537634545048576	-1.34815677011077	-1.75682968072252	-2.95217973571156	0.34348412143192
AL1G45820	AT2G04063	OG0003101	.	protein_coding	glycine-rich protein	.	glycine-rich protein%3B FUNCTIONS IN: molecular_function unknown%3B INVOLVED IN: biological_process unknown%3B LOCATED IN: endomembrane system%3B BEST Arabidopsis thaliana protein match is: proline-rich family protein (TAIR:AT1G31750.1)%3B Has 132 Blast hits to 125 proteins in 23 species: Archae - 0%3B Bacteria - 8%3B Metazoa - 45%3B Fungi - 0%3B Plants - 73%3B Viruses - 0%3B Other Eukaryotes - 6…	.	glycine-rich protein%3B FUNCTIONS IN: molecular_function unknown%3B INVOLVED IN: biological_process unknown%3B LOCATED IN: endomembrane system%3B BEST Arabidopsis thaliana protein match is: proline-rich family protein (TAIR:AT1G31750.1)%3B Has 132 Blast hits to 125 proteins in 23 species: Archae - 0%3B Bacteria - 8%3B Metazoa - 45%3B Fungi - 0%3B Plants - 73%3B Viruses - 0%3B Other Eukaryotes - 6…	scaffold_1	14375200	14376635	1436	-	scaffold_1	14377143	14377870	728	*	0.226799677191894	-0.209838663725935	148.345737931908	0.294642857142857	4.58303749063604	1.56814111364E-5	20.0268	-0.001964286	0.28660714	0.031216931	0.180887097	0.164285714	0.16625	NO	NO	NO	NO	NO	B	B	-4.4753417701822	-1.97282062623659	-1.51478510634942	0.212249135494975	-2.70400054074671	-0.239429442888284	-1.4709771841391	0.190868268525468	-2.50252114394561	-1.72703424184439
AL1G45820	AT2G04063	OG0003101	.	protein_coding	glycine-rich protein	.	glycine-rich protein%3B FUNCTIONS IN: molecular_function unknown%3B INVOLVED IN: biological_process unknown%3B LOCATED IN: endomembrane system%3B BEST Arabidopsis thaliana protein match is: proline-rich family protein (TAIR:AT1G31750.1)%3B Has 132 Blast hits to 125 proteins in 23 species: Archae - 0%3B Bacteria - 8%3B Metazoa - 45%3B Fungi - 0%3B Plants - 73%3B Viruses - 0%3B Other Eukaryotes - 6…	.	glycine-rich protein%3B FUNCTIONS IN: molecular_function unknown%3B INVOLVED IN: biological_process unknown%3B LOCATED IN: endomembrane system%3B BEST Arabidopsis thaliana protein match is: proline-rich family protein (TAIR:AT1G31750.1)%3B Has 132 Blast hits to 125 proteins in 23 species: Archae - 0%3B Bacteria - 8%3B Metazoa - 45%3B Fungi - 0%3B Plants - 73%3B Viruses - 0%3B Other Eukaryotes - 6…	scaffold_1	14375200	14376635	1436	-	scaffold_1	14376501	14377135	635	*	0.248250830978617	-0.190691613619744	142.465949187033	0.294910714285714	4.80142101144356	6.3294734388E-5	14.5037	0.06428571	0.29321429	0.058095238	0.109516129	0.184285714	0.12	NO	NO	NO	NO	NO	B	A	-3.63459704915074	-1.29665448169464	-2.44696055641061	0.812928061438258	-1.86325581971525	0.436736701653666	-2.40315263420029	0.791547194468751	-2.3379425674561	-3.25988861784887
AL1G45820	AT2G04063	OG0003101	.	protein_coding	glycine-rich protein	.	glycine-rich protein%3B FUNCTIONS IN: molecular_function unknown%3B INVOLVED IN: biological_process unknown%3B LOCATED IN: endomembrane system%3B BEST Arabidopsis thaliana protein match is: proline-rich family protein (TAIR:AT1G31750.1)%3B Has 132 Blast hits to 125 proteins in 23 species: Archae - 0%3B Bacteria - 8%3B Metazoa - 45%3B Fungi - 0%3B Plants - 73%3B Viruses - 0%3B Other Eukaryotes - 6…	.	glycine-rich protein%3B FUNCTIONS IN: molecular_function unknown%3B INVOLVED IN: biological_process unknown%3B LOCATED IN: endomembrane system%3B BEST Arabidopsis thaliana protein match is: proline-rich family protein (TAIR:AT1G31750.1)%3B Has 132 Blast hits to 125 proteins in 23 species: Archae - 0%3B Bacteria - 8%3B Metazoa - 45%3B Fungi - 0%3B Plants - 73%3B Viruses - 0%3B Other Eukaryotes - 6…	scaffold_1	14375200	14376635	1436	-	scaffold_1	14375051	14375414	364	*	0.342445604513102	-0.230531788216289	178.422950803873	0.380357142857143	6.63213590007172	6.3294734388E-5	26.6531	0.3096429	0.38035714	0.066243386	0.069516129	0.417142857	0.1075	NO	NO	NO	NO	NO	B	A	-3.74777422313574	-2.20322913428765	-4.9159658025186	-0.0665879640768545	-1.97643299370025	-0.469837950939344	-4.87215788030828	-0.0879688310463614	-1.54454508884809	-4.84937783844175
AL1G45820	AT2G04063	OG0003101	.	protein_coding	glycine-rich protein	.	glycine-rich protein%3B FUNCTIONS IN: molecular_function unknown%3B INVOLVED IN: biological_process unknown%3B LOCATED IN: endomembrane system%3B BEST Arabidopsis thaliana protein match is: proline-rich family protein (TAIR:AT1G31750.1)%3B Has 132 Blast hits to 125 proteins in 23 species: Archae - 0%3B Bacteria - 8%3B Metazoa - 45%3B Fungi - 0%3B Plants - 73%3B Viruses - 0%3B Other Eukaryotes - 6…	.	glycine-rich protein%3B FUNCTIONS IN: molecular_function unknown%3B INVOLVED IN: biological_process unknown%3B LOCATED IN: endomembrane system%3B BEST Arabidopsis thaliana protein match is: proline-rich family protein (TAIR:AT1G31750.1)%3B Has 132 Blast hits to 125 proteins in 23 species: Archae - 0%3B Bacteria - 8%3B Metazoa - 45%3B Fungi - 0%3B Plants - 73%3B Viruses - 0%3B Other Eukaryotes - 6…	scaffold_1	14375200	14376635	1436	-	scaffold_1	14375445	14376492	1048	*	0.189347289697726	-0.189687014174205	123.702131357743	0.230803571428571	3.88854792521596	6.3294734388E-5	9.0362	-0.001785714	0.23035714	0.019365079	0.155483871	0.115714286	0.1175	NO	NO	NO	NO	NO	B	B	-4.74817960032462	-1.78156650517461	0.0582609656288239	0.721369610832591	-2.97683837088913	-0.0481753218263037	0.102068887839146	0.699988743863084	-2.96661309515001	-0.663108645203767
AL1G45820	AT2G04063	OG0003101	.	protein_coding	glycine-rich protein	.	glycine-rich protein%3B FUNCTIONS IN: molecular_function unknown%3B INVOLVED IN: biological_process unknown%3B LOCATED IN: endomembrane system%3B BEST Arabidopsis thaliana protein match is: proline-rich family protein (TAIR:AT1G31750.1)%3B Has 132 Blast hits to 125 proteins in 23 species: Archae - 0%3B Bacteria - 8%3B Metazoa - 45%3B Fungi - 0%3B Plants - 73%3B Viruses - 0%3B Other Eukaryotes - 6…	.	glycine-rich protein%3B FUNCTIONS IN: molecular_function unknown%3B INVOLVED IN: biological_process unknown%3B LOCATED IN: endomembrane system%3B BEST Arabidopsis thaliana protein match is: proline-rich family protein (TAIR:AT1G31750.1)%3B Has 132 Blast hits to 125 proteins in 23 species: Archae - 0%3B Bacteria - 8%3B Metazoa - 45%3B Fungi - 0%3B Plants - 73%3B Viruses - 0%3B Other Eukaryotes - 6…	scaffold_1	14375200	14376635	1436	-	scaffold_1	14377143	14377870	728	*	0.226799677191894	-0.209838663725935	148.345737931908	0.294642857142857	4.58303749063604	1.56814111364E-5	20.0268	-0.001964286	0.28660714	0.031216931	0.180887097	0.164285714	0.16625	NO	NO	NO	NO	NO	B	A	-4.4753417701822	-1.97282062623659	-1.51478510634942	0.212249135494975	-2.70400054074671	-0.239429442888284	-1.4709771841391	0.190868268525468	-2.50252114394561	-1.72703424184439
AL1G45820	AT2G04063	OG0003101	.	protein_coding	glycine-rich protein	.	glycine-rich protein%3B FUNCTIONS IN: molecular_function unknown%3B INVOLVED IN: biological_process unknown%3B LOCATED IN: endomembrane system%3B BEST Arabidopsis thaliana protein match is: proline-rich family protein (TAIR:AT1G31750.1)%3B Has 132 Blast hits to 125 proteins in 23 species: Archae - 0%3B Bacteria - 8%3B Metazoa - 45%3B Fungi - 0%3B Plants - 73%3B Viruses - 0%3B Other Eukaryotes - 6…	.	glycine-rich protein%3B FUNCTIONS IN: molecular_function unknown%3B INVOLVED IN: biological_process unknown%3B LOCATED IN: endomembrane system%3B BEST Arabidopsis thaliana protein match is: proline-rich family protein (TAIR:AT1G31750.1)%3B Has 132 Blast hits to 125 proteins in 23 species: Archae - 0%3B Bacteria - 8%3B Metazoa - 45%3B Fungi - 0%3B Plants - 73%3B Viruses - 0%3B Other Eukaryotes - 6…	scaffold_1	14375200	14376635	1436	-	scaffold_1	14375051	14375414	364	*	0.342445604513102	-0.230531788216289	178.422950803873	0.380357142857143	6.63213590007172	6.3294734388E-5	26.6531	0.3096429	0.38035714	0.066243386	0.069516129	0.417142857	0.1075	NO	NO	NO	NO	NO	B	B	-3.74777422313574	-2.20322913428765	-4.9159658025186	-0.0665879640768545	-1.97643299370025	-0.469837950939344	-4.87215788030828	-0.0879688310463614	-1.54454508884809	-4.84937783844175
AL1G45820	AT2G04063	OG0003101	.	protein_coding	glycine-rich protein	.	glycine-rich protein%3B FUNCTIONS IN: molecular_function unknown%3B INVOLVED IN: biological_process unknown%3B LOCATED IN: endomembrane system%3B BEST Arabidopsis thaliana protein match is: proline-rich family protein (TAIR:AT1G31750.1)%3B Has 132 Blast hits to 125 proteins in 23 species: Archae - 0%3B Bacteria - 8%3B Metazoa - 45%3B Fungi - 0%3B Plants - 73%3B Viruses - 0%3B Other Eukaryotes - 6…	.	glycine-rich protein%3B FUNCTIONS IN: molecular_function unknown%3B INVOLVED IN: biological_process unknown%3B LOCATED IN: endomembrane system%3B BEST Arabidopsis thaliana protein match is: proline-rich family protein (TAIR:AT1G31750.1)%3B Has 132 Blast hits to 125 proteins in 23 species: Archae - 0%3B Bacteria - 8%3B Metazoa - 45%3B Fungi - 0%3B Plants - 73%3B Viruses - 0%3B Other Eukaryotes - 6…	scaffold_1	14375200	14376635	1436	-	scaffold_1	14377143	14377870	728	*	0.226799677191894	-0.209838663725935	148.345737931908	0.294642857142857	4.58303749063604	1.56814111364E-5	20.0268	-0.001964286	0.28660714	0.031216931	0.180887097	0.164285714	0.16625	NO	NO	NO	NO	NO	B	B	-4.4753417701822	-1.97282062623659	-1.51478510634942	0.212249135494975	-2.70400054074671	-0.239429442888284	-1.4709771841391	0.190868268525468	-2.50252114394561	-1.72703424184439
AL1G45820	AT2G04063	OG0003101	.	protein_coding	glycine-rich protein	.	glycine-rich protein%3B FUNCTIONS IN: molecular_function unknown%3B INVOLVED IN: biological_process unknown%3B LOCATED IN: endomembrane system%3B BEST Arabidopsis thaliana protein match is: proline-rich family protein (TAIR:AT1G31750.1)%3B Has 132 Blast hits to 125 proteins in 23 species: Archae - 0%3B Bacteria - 8%3B Metazoa - 45%3B Fungi - 0%3B Plants - 73%3B Viruses - 0%3B Other Eukaryotes - 6…	.	glycine-rich protein%3B FUNCTIONS IN: molecular_function unknown%3B INVOLVED IN: biological_process unknown%3B LOCATED IN: endomembrane system%3B BEST Arabidopsis thaliana protein match is: proline-rich family protein (TAIR:AT1G31750.1)%3B Has 132 Blast hits to 125 proteins in 23 species: Archae - 0%3B Bacteria - 8%3B Metazoa - 45%3B Fungi - 0%3B Plants - 73%3B Viruses - 0%3B Other Eukaryotes - 6…	scaffold_1	14375200	14376635	1436	-	scaffold_1	14378560	14379199	640	*	0.262309032689763	-0.201318135834987	145.312923159356	0.318214285714286	4.45461573840008	3.47844308701E-4	15.7343	0.1383929	0.31303571	0.058095238	0.132177419	0.307142857	0.16875	NO	NO	NO	NO	NO	B	B	-3.55375621059002	-1.56019362489027	-4.7207128366274	-0.473051994795985	-1.78241498115453	0.173197558458036	-4.67690491441708	-0.494432861765492	-1.99356258569975	-4.24766084183142
AL1G45820	AT2G04063	OG0003101	.	protein_coding	glycine-rich protein	.	glycine-rich protein%3B FUNCTIONS IN: molecular_function unknown%3B INVOLVED IN: biological_process unknown%3B LOCATED IN: endomembrane system%3B BEST Arabidopsis thaliana protein match is: proline-rich family protein (TAIR:AT1G31750.1)%3B Has 132 Blast hits to 125 proteins in 23 species: Archae - 0%3B Bacteria - 8%3B Metazoa - 45%3B Fungi - 0%3B Plants - 73%3B Viruses - 0%3B Other Eukaryotes - 6…	.	glycine-rich protein%3B FUNCTIONS IN: molecular_function unknown%3B INVOLVED IN: biological_process unknown%3B LOCATED IN: endomembrane system%3B BEST Arabidopsis thaliana protein match is: proline-rich family protein (TAIR:AT1G31750.1)%3B Has 132 Blast hits to 125 proteins in 23 species: Archae - 0%3B Bacteria - 8%3B Metazoa - 45%3B Fungi - 0%3B Plants - 73%3B Viruses - 0%3B Other Eukaryotes - 6…	scaffold_1	14375200	14376635	1436	-	scaffold_1	14376501	14377135	635	*	0.248250830978617	-0.190691613619744	142.465949187033	0.294910714285714	4.80142101144356	6.3294734388E-5	14.5037	0.06428571	0.29321429	0.058095238	0.109516129	0.184285714	0.12	NO	NO	NO	NO	NO	B	B	-3.63459704915074	-1.29665448169464	-2.44696055641061	0.812928061438258	-1.86325581971525	0.436736701653666	-2.40315263420029	0.791547194468751	-2.3379425674561	-3.25988861784887
AL1G45820	AT2G04063	OG0003101	.	protein_coding	glycine-rich protein	.	glycine-rich protein%3B FUNCTIONS IN: molecular_function unknown%3B INVOLVED IN: biological_process unknown%3B LOCATED IN: endomembrane system%3B BEST Arabidopsis thaliana protein match is: proline-rich family protein (TAIR:AT1G31750.1)%3B Has 132 Blast hits to 125 proteins in 23 species: Archae - 0%3B Bacteria - 8%3B Metazoa - 45%3B Fungi - 0%3B Plants - 73%3B Viruses - 0%3B Other Eukaryotes - 6…	.	glycine-rich protein%3B FUNCTIONS IN: molecular_function unknown%3B INVOLVED IN: biological_process unknown%3B LOCATED IN: endomembrane system%3B BEST Arabidopsis thaliana protein match is: proline-rich family protein (TAIR:AT1G31750.1)%3B Has 132 Blast hits to 125 proteins in 23 species: Archae - 0%3B Bacteria - 8%3B Metazoa - 45%3B Fungi - 0%3B Plants - 73%3B Viruses - 0%3B Other Eukaryotes - 6…	scaffold_1	14375200	14376635	1436	-	scaffold_1	14375445	14376492	1048	*	0.189347289697726	-0.189687014174205	123.702131357743	0.230803571428571	3.88854792521596	6.3294734388E-5	9.0362	-0.001785714	0.23035714	0.019365079	0.155483871	0.115714286	0.1175	NO	NO	NO	NO	NO	B	B	-4.74817960032462	-1.78156650517461	0.0582609656288239	0.721369610832591	-2.97683837088913	-0.0481753218263037	0.102068887839146	0.699988743863084	-2.96661309515001	-0.663108645203767
AL1G45820	AT2G04063	OG0003101	.	protein_coding	glycine-rich protein	.	glycine-rich protein%3B FUNCTIONS IN: molecular_function unknown%3B INVOLVED IN: biological_process unknown%3B LOCATED IN: endomembrane system%3B BEST Arabidopsis thaliana protein match is: proline-rich family protein (TAIR:AT1G31750.1)%3B Has 132 Blast hits to 125 proteins in 23 species: Archae - 0%3B Bacteria - 8%3B Metazoa - 45%3B Fungi - 0%3B Plants - 73%3B Viruses - 0%3B Other Eukaryotes - 6…	.	glycine-rich protein%3B FUNCTIONS IN: molecular_function unknown%3B INVOLVED IN: biological_process unknown%3B LOCATED IN: endomembrane system%3B BEST Arabidopsis thaliana protein match is: proline-rich family protein (TAIR:AT1G31750.1)%3B Has 132 Blast hits to 125 proteins in 23 species: Archae - 0%3B Bacteria - 8%3B Metazoa - 45%3B Fungi - 0%3B Plants - 73%3B Viruses - 0%3B Other Eukaryotes - 6…	scaffold_1	14375200	14376635	1436	-	scaffold_1	14376501	14377135	635	*	0.248250830978617	-0.190691613619744	142.465949187033	0.294910714285714	4.80142101144356	6.3294734388E-5	14.5037	0.06428571	0.29321429	0.058095238	0.109516129	0.184285714	0.12	NO	NO	NO	NO	NO	B	B	-3.63459704915074	-1.29665448169464	-2.44696055641061	0.812928061438258	-1.86325581971525	0.436736701653666	-2.40315263420029	0.791547194468751	-2.3379425674561	-3.25988861784887
AL1G45820	AT2G04063	OG0003101	.	protein_coding	glycine-rich protein	.	glycine-rich protein%3B FUNCTIONS IN: molecular_function unknown%3B INVOLVED IN: biological_process unknown%3B LOCATED IN: endomembrane system%3B BEST Arabidopsis thaliana protein match is: proline-rich family protein (TAIR:AT1G31750.1)%3B Has 132 Blast hits to 125 proteins in 23 species: Archae - 0%3B Bacteria - 8%3B Metazoa - 45%3B Fungi - 0%3B Plants - 73%3B Viruses - 0%3B Other Eukaryotes - 6…	.	glycine-rich protein%3B FUNCTIONS IN: molecular_function unknown%3B INVOLVED IN: biological_process unknown%3B LOCATED IN: endomembrane system%3B BEST Arabidopsis thaliana protein match is: proline-rich family protein (TAIR:AT1G31750.1)%3B Has 132 Blast hits to 125 proteins in 23 species: Archae - 0%3B Bacteria - 8%3B Metazoa - 45%3B Fungi - 0%3B Plants - 73%3B Viruses - 0%3B Other Eukaryotes - 6…	scaffold_1	14375200	14376635	1436	-	scaffold_1	14378560	14379199	640	*	0.262309032689763	-0.201318135834987	145.312923159356	0.318214285714286	4.45461573840008	3.47844308701E-4	15.7343	0.1383929	0.31303571	0.058095238	0.132177419	0.307142857	0.16875	NO	NO	NO	NO	NO	B	B	-3.55375621059002	-1.56019362489027	-4.7207128366274	-0.473051994795985	-1.78241498115453	0.173197558458036	-4.67690491441708	-0.494432861765492	-1.99356258569975	-4.24766084183142
AL1G45820	AT2G04063	OG0003101	.	protein_coding	glycine-rich protein	.	glycine-rich protein%3B FUNCTIONS IN: molecular_function unknown%3B INVOLVED IN: biological_process unknown%3B LOCATED IN: endomembrane system%3B BEST Arabidopsis thaliana protein match is: proline-rich family protein (TAIR:AT1G31750.1)%3B Has 132 Blast hits to 125 proteins in 23 species: Archae - 0%3B Bacteria - 8%3B Metazoa - 45%3B Fungi - 0%3B Plants - 73%3B Viruses - 0%3B Other Eukaryotes - 6…	.	glycine-rich protein%3B FUNCTIONS IN: molecular_function unknown%3B INVOLVED IN: biological_process unknown%3B LOCATED IN: endomembrane system%3B BEST Arabidopsis thaliana protein match is: proline-rich family protein (TAIR:AT1G31750.1)%3B Has 132 Blast hits to 125 proteins in 23 species: Archae - 0%3B Bacteria - 8%3B Metazoa - 45%3B Fungi - 0%3B Plants - 73%3B Viruses - 0%3B Other Eukaryotes - 6…	scaffold_1	14375200	14376635	1436	-	scaffold_1	14377143	14377870	728	*	0.226799677191894	-0.209838663725935	148.345737931908	0.294642857142857	4.58303749063604	1.56814111364E-5	20.0268	-0.001964286	0.28660714	0.031216931	0.180887097	0.164285714	0.16625	NO	NO	NO	NO	NO	B	B	-4.4753417701822	-1.97282062623659	-1.51478510634942	0.212249135494975	-2.70400054074671	-0.239429442888284	-1.4709771841391	0.190868268525468	-2.50252114394561	-1.72703424184439
AL1G45820	AT2G04063	OG0003101	.	protein_coding	glycine-rich protein	.	glycine-rich protein%3B FUNCTIONS IN: molecular_function unknown%3B INVOLVED IN: biological_process unknown%3B LOCATED IN: endomembrane system%3B BEST Arabidopsis thaliana protein match is: proline-rich family protein (TAIR:AT1G31750.1)%3B Has 132 Blast hits to 125 proteins in 23 species: Archae - 0%3B Bacteria - 8%3B Metazoa - 45%3B Fungi - 0%3B Plants - 73%3B Viruses - 0%3B Other Eukaryotes - 6…	.	glycine-rich protein%3B FUNCTIONS IN: molecular_function unknown%3B INVOLVED IN: biological_process unknown%3B LOCATED IN: endomembrane system%3B BEST Arabidopsis thaliana protein match is: proline-rich family protein (TAIR:AT1G31750.1)%3B Has 132 Blast hits to 125 proteins in 23 species: Archae - 0%3B Bacteria - 8%3B Metazoa - 45%3B Fungi - 0%3B Plants - 73%3B Viruses - 0%3B Other Eukaryotes - 6…	scaffold_1	14375200	14376635	1436	-	scaffold_1	14375051	14375414	364	*	0.342445604513102	-0.230531788216289	178.422950803873	0.380357142857143	6.63213590007172	6.3294734388E-5	26.6531	0.3096429	0.38035714	0.066243386	0.069516129	0.417142857	0.1075	NO	NO	NO	NO	NO	B	B	-3.74777422313574	-2.20322913428765	-4.9159658025186	-0.0665879640768545	-1.97643299370025	-0.469837950939344	-4.87215788030828	-0.0879688310463614	-1.54454508884809	-4.84937783844175
AL1G45820	AT2G04063	OG0003101	.	protein_coding	glycine-rich protein	.	glycine-rich protein%3B FUNCTIONS IN: molecular_function unknown%3B INVOLVED IN: biological_process unknown%3B LOCATED IN: endomembrane system%3B BEST Arabidopsis thaliana protein match is: proline-rich family protein (TAIR:AT1G31750.1)%3B Has 132 Blast hits to 125 proteins in 23 species: Archae - 0%3B Bacteria - 8%3B Metazoa - 45%3B Fungi - 0%3B Plants - 73%3B Viruses - 0%3B Other Eukaryotes - 6…	.	glycine-rich protein%3B FUNCTIONS IN: molecular_function unknown%3B INVOLVED IN: biological_process unknown%3B LOCATED IN: endomembrane system%3B BEST Arabidopsis thaliana protein match is: proline-rich family protein (TAIR:AT1G31750.1)%3B Has 132 Blast hits to 125 proteins in 23 species: Archae - 0%3B Bacteria - 8%3B Metazoa - 45%3B Fungi - 0%3B Plants - 73%3B Viruses - 0%3B Other Eukaryotes - 6…	scaffold_1	14375200	14376635	1436	-	scaffold_1	14375051	14375414	364	*	0.342445604513102	-0.230531788216289	178.422950803873	0.380357142857143	6.63213590007172	6.3294734388E-5	26.6531	0.3096429	0.38035714	0.066243386	0.069516129	0.417142857	0.1075	NO	NO	NO	NO	NO	C	B	-3.74777422313574	-2.20322913428765	-4.9159658025186	-0.0665879640768545	-1.97643299370025	-0.469837950939344	-4.87215788030828	-0.0879688310463614	-1.54454508884809	-4.84937783844175
AL1G45820	AT2G04063	OG0003101	.	protein_coding	glycine-rich protein	.	glycine-rich protein%3B FUNCTIONS IN: molecular_function unknown%3B INVOLVED IN: biological_process unknown%3B LOCATED IN: endomembrane system%3B BEST Arabidopsis thaliana protein match is: proline-rich family protein (TAIR:AT1G31750.1)%3B Has 132 Blast hits to 125 proteins in 23 species: Archae - 0%3B Bacteria - 8%3B Metazoa - 45%3B Fungi - 0%3B Plants - 73%3B Viruses - 0%3B Other Eukaryotes - 6…	.	glycine-rich protein%3B FUNCTIONS IN: molecular_function unknown%3B INVOLVED IN: biological_process unknown%3B LOCATED IN: endomembrane system%3B BEST Arabidopsis thaliana protein match is: proline-rich family protein (TAIR:AT1G31750.1)%3B Has 132 Blast hits to 125 proteins in 23 species: Archae - 0%3B Bacteria - 8%3B Metazoa - 45%3B Fungi - 0%3B Plants - 73%3B Viruses - 0%3B Other Eukaryotes - 6…	scaffold_1	14375200	14376635	1436	-	scaffold_1	14376501	14377135	635	*	0.248250830978617	-0.190691613619744	142.465949187033	0.294910714285714	4.80142101144356	6.3294734388E-5	14.5037	0.06428571	0.29321429	0.058095238	0.109516129	0.184285714	0.12	NO	NO	NO	NO	NO	B	B	-3.63459704915074	-1.29665448169464	-2.44696055641061	0.812928061438258	-1.86325581971525	0.436736701653666	-2.40315263420029	0.791547194468751	-2.3379425674561	-3.25988861784887
AL1G45820	AT2G04063	OG0003101	.	protein_coding	glycine-rich protein	.	glycine-rich protein%3B FUNCTIONS IN: molecular_function unknown%3B INVOLVED IN: biological_process unknown%3B LOCATED IN: endomembrane system%3B BEST Arabidopsis thaliana protein match is: proline-rich family protein (TAIR:AT1G31750.1)%3B Has 132 Blast hits to 125 proteins in 23 species: Archae - 0%3B Bacteria - 8%3B Metazoa - 45%3B Fungi - 0%3B Plants - 73%3B Viruses - 0%3B Other Eukaryotes - 6…	.	glycine-rich protein%3B FUNCTIONS IN: molecular_function unknown%3B INVOLVED IN: biological_process unknown%3B LOCATED IN: endomembrane system%3B BEST Arabidopsis thaliana protein match is: proline-rich family protein (TAIR:AT1G31750.1)%3B Has 132 Blast hits to 125 proteins in 23 species: Archae - 0%3B Bacteria - 8%3B Metazoa - 45%3B Fungi - 0%3B Plants - 73%3B Viruses - 0%3B Other Eukaryotes - 6…	scaffold_1	14375200	14376635	1436	-	scaffold_1	14375051	14375414	364	*	0.342445604513102	-0.230531788216289	178.422950803873	0.380357142857143	6.63213590007172	6.3294734388E-5	26.6531	0.3096429	0.38035714	0.066243386	0.069516129	0.417142857	0.1075	NO	NO	NO	NO	NO	B	B	-3.74777422313574	-2.20322913428765	-4.9159658025186	-0.0665879640768545	-1.97643299370025	-0.469837950939344	-4.87215788030828	-0.0879688310463614	-1.54454508884809	-4.84937783844175
AL1G45820	AT2G04063	OG0003101	.	protein_coding	glycine-rich protein	.	glycine-rich protein%3B FUNCTIONS IN: molecular_function unknown%3B INVOLVED IN: biological_process unknown%3B LOCATED IN: endomembrane system%3B BEST Arabidopsis thaliana protein match is: proline-rich family protein (TAIR:AT1G31750.1)%3B Has 132 Blast hits to 125 proteins in 23 species: Archae - 0%3B Bacteria - 8%3B Metazoa - 45%3B Fungi - 0%3B Plants - 73%3B Viruses - 0%3B Other Eukaryotes - 6…	.	glycine-rich protein%3B FUNCTIONS IN: molecular_function unknown%3B INVOLVED IN: biological_process unknown%3B LOCATED IN: endomembrane system%3B BEST Arabidopsis thaliana protein match is: proline-rich family protein (TAIR:AT1G31750.1)%3B Has 132 Blast hits to 125 proteins in 23 species: Archae - 0%3B Bacteria - 8%3B Metazoa - 45%3B Fungi - 0%3B Plants - 73%3B Viruses - 0%3B Other Eukaryotes - 6…	scaffold_1	14375200	14376635	1436	-	scaffold_1	14375051	14375414	364	*	0.342445604513102	-0.230531788216289	178.422950803873	0.380357142857143	6.63213590007172	6.3294734388E-5	26.6531	0.3096429	0.38035714	0.066243386	0.069516129	0.417142857	0.1075	NO	NO	NO	NO	NO	B	B	-3.74777422313574	-2.20322913428765	-4.9159658025186	-0.0665879640768545	-1.97643299370025	-0.469837950939344	-4.87215788030828	-0.0879688310463614	-1.54454508884809	-4.84937783844175
AL1G45820	AT2G04063	OG0003101	.	protein_coding	glycine-rich protein	.	glycine-rich protein%3B FUNCTIONS IN: molecular_function unknown%3B INVOLVED IN: biological_process unknown%3B LOCATED IN: endomembrane system%3B BEST Arabidopsis thaliana protein match is: proline-rich family protein (TAIR:AT1G31750.1)%3B Has 132 Blast hits to 125 proteins in 23 species: Archae - 0%3B Bacteria - 8%3B Metazoa - 45%3B Fungi - 0%3B Plants - 73%3B Viruses - 0%3B Other Eukaryotes - 6…	.	glycine-rich protein%3B FUNCTIONS IN: molecular_function unknown%3B INVOLVED IN: biological_process unknown%3B LOCATED IN: endomembrane system%3B BEST Arabidopsis thaliana protein match is: proline-rich family protein (TAIR:AT1G31750.1)%3B Has 132 Blast hits to 125 proteins in 23 species: Archae - 0%3B Bacteria - 8%3B Metazoa - 45%3B Fungi - 0%3B Plants - 73%3B Viruses - 0%3B Other Eukaryotes - 6…	scaffold_1	14375200	14376635	1436	-	scaffold_1	14378560	14379199	640	*	0.262309032689763	-0.201318135834987	145.312923159356	0.318214285714286	4.45461573840008	3.47844308701E-4	15.7343	0.1383929	0.31303571	0.058095238	0.132177419	0.307142857	0.16875	NO	NO	NO	NO	NO	B	A	-3.55375621059002	-1.56019362489027	-4.7207128366274	-0.473051994795985	-1.78241498115453	0.173197558458036	-4.67690491441708	-0.494432861765492	-1.99356258569975	-4.24766084183142
AL1G45820	AT1G31750	OG0003101	.	protein_coding	proline-rich family protein	.	proline-rich family protein%3B BEST Arabidopsis thaliana protein match is: glycine-rich protein (TAIR:AT2G04063.1)%3B Has 30775 Blast hits to 15451 proteins in 908 species: Archae - 8%3B Bacteria - 4096%3B Metazoa - 13079%3B Fungi - 3329%3B Plants - 5909%3B Viruses - 858%3B Other Eukaryotes - 3496 (source: NCBI BLink).	.	proline-rich family protein%3B BEST Arabidopsis thaliana protein match is: glycine-rich protein (TAIR:AT2G04063.1)%3B Has 30775 Blast hits to 15451 proteins in 908 species: Archae - 8%3B Bacteria - 4096%3B Metazoa - 13079%3B Fungi - 3329%3B Plants - 5909%3B Viruses - 858%3B Other Eukaryotes - 3496 (source: NCBI BLink).	scaffold_1	14375200	14376635	1436	-	scaffold_1	14377143	14377870	728	*	0.226799677191894	-0.209838663725935	148.345737931908	0.294642857142857	4.58303749063604	1.56814111364E-5	20.0268	-0.001964286	0.28660714	0.031216931	0.180887097	0.164285714	0.16625	NO	NO	NO	NO	NO	B	B	-4.4753417701822	-1.97282062623659	-1.51478510634942	0.212249135494975	-2.70400054074671	-0.239429442888284	-1.4709771841391	0.190868268525468	-2.50252114394561	-1.72703424184439
AL1G45820	AT1G31750	OG0003101	.	protein_coding	proline-rich family protein	.	proline-rich family protein%3B BEST Arabidopsis thaliana protein match is: glycine-rich protein (TAIR:AT2G04063.1)%3B Has 30775 Blast hits to 15451 proteins in 908 species: Archae - 8%3B Bacteria - 4096%3B Metazoa - 13079%3B Fungi - 3329%3B Plants - 5909%3B Viruses - 858%3B Other Eukaryotes - 3496 (source: NCBI BLink).	.	proline-rich family protein%3B BEST Arabidopsis thaliana protein match is: glycine-rich protein (TAIR:AT2G04063.1)%3B Has 30775 Blast hits to 15451 proteins in 908 species: Archae - 8%3B Bacteria - 4096%3B Metazoa - 13079%3B Fungi - 3329%3B Plants - 5909%3B Viruses - 858%3B Other Eukaryotes - 3496 (source: NCBI BLink).	scaffold_1	14375200	14376635	1436	-	scaffold_1	14376501	14377135	635	*	0.248250830978617	-0.190691613619744	142.465949187033	0.294910714285714	4.80142101144356	6.3294734388E-5	14.5037	0.06428571	0.29321429	0.058095238	0.109516129	0.184285714	0.12	NO	NO	NO	NO	NO	B	A	-3.63459704915074	-1.29665448169464	-2.44696055641061	0.812928061438258	-1.86325581971525	0.436736701653666	-2.40315263420029	0.791547194468751	-2.3379425674561	-3.25988861784887
AL1G45820	AT1G31750	OG0003101	.	protein_coding	proline-rich family protein	.	proline-rich family protein%3B BEST Arabidopsis thaliana protein match is: glycine-rich protein (TAIR:AT2G04063.1)%3B Has 30775 Blast hits to 15451 proteins in 908 species: Archae - 8%3B Bacteria - 4096%3B Metazoa - 13079%3B Fungi - 3329%3B Plants - 5909%3B Viruses - 858%3B Other Eukaryotes - 3496 (source: NCBI BLink).	.	proline-rich family protein%3B BEST Arabidopsis thaliana protein match is: glycine-rich protein (TAIR:AT2G04063.1)%3B Has 30775 Blast hits to 15451 proteins in 908 species: Archae - 8%3B Bacteria - 4096%3B Metazoa - 13079%3B Fungi - 3329%3B Plants - 5909%3B Viruses - 858%3B Other Eukaryotes - 3496 (source: NCBI BLink).	scaffold_1	14375200	14376635	1436	-	scaffold_1	14375051	14375414	364	*	0.342445604513102	-0.230531788216289	178.422950803873	0.380357142857143	6.63213590007172	6.3294734388E-5	26.6531	0.3096429	0.38035714	0.066243386	0.069516129	0.417142857	0.1075	NO	NO	NO	NO	NO	B	A	-3.74777422313574	-2.20322913428765	-4.9159658025186	-0.0665879640768545	-1.97643299370025	-0.469837950939344	-4.87215788030828	-0.0879688310463614	-1.54454508884809	-4.84937783844175
AL1G45820	AT1G31750	OG0003101	.	protein_coding	proline-rich family protein	.	proline-rich family protein%3B BEST Arabidopsis thaliana protein match is: glycine-rich protein (TAIR:AT2G04063.1)%3B Has 30775 Blast hits to 15451 proteins in 908 species: Archae - 8%3B Bacteria - 4096%3B Metazoa - 13079%3B Fungi - 3329%3B Plants - 5909%3B Viruses - 858%3B Other Eukaryotes - 3496 (source: NCBI BLink).	.	proline-rich family protein%3B BEST Arabidopsis thaliana protein match is: glycine-rich protein (TAIR:AT2G04063.1)%3B Has 30775 Blast hits to 15451 proteins in 908 species: Archae - 8%3B Bacteria - 4096%3B Metazoa - 13079%3B Fungi - 3329%3B Plants - 5909%3B Viruses - 858%3B Other Eukaryotes - 3496 (source: NCBI BLink).	scaffold_1	14375200	14376635	1436	-	scaffold_1	14375445	14376492	1048	*	0.189347289697726	-0.189687014174205	123.702131357743	0.230803571428571	3.88854792521596	6.3294734388E-5	9.0362	-0.001785714	0.23035714	0.019365079	0.155483871	0.115714286	0.1175	NO	NO	NO	NO	NO	B	B	-4.74817960032462	-1.78156650517461	0.0582609656288239	0.721369610832591	-2.97683837088913	-0.0481753218263037	0.102068887839146	0.699988743863084	-2.96661309515001	-0.663108645203767
AL1G45820	AT1G31750	OG0003101	.	protein_coding	proline-rich family protein	.	proline-rich family protein%3B BEST Arabidopsis thaliana protein match is: glycine-rich protein (TAIR:AT2G04063.1)%3B Has 30775 Blast hits to 15451 proteins in 908 species: Archae - 8%3B Bacteria - 4096%3B Metazoa - 13079%3B Fungi - 3329%3B Plants - 5909%3B Viruses - 858%3B Other Eukaryotes - 3496 (source: NCBI BLink).	.	proline-rich family protein%3B BEST Arabidopsis thaliana protein match is: glycine-rich protein (TAIR:AT2G04063.1)%3B Has 30775 Blast hits to 15451 proteins in 908 species: Archae - 8%3B Bacteria - 4096%3B Metazoa - 13079%3B Fungi - 3329%3B Plants - 5909%3B Viruses - 858%3B Other Eukaryotes - 3496 (source: NCBI BLink).	scaffold_1	14375200	14376635	1436	-	scaffold_1	14377143	14377870	728	*	0.226799677191894	-0.209838663725935	148.345737931908	0.294642857142857	4.58303749063604	1.56814111364E-5	20.0268	-0.001964286	0.28660714	0.031216931	0.180887097	0.164285714	0.16625	NO	NO	NO	NO	NO	B	A	-4.4753417701822	-1.97282062623659	-1.51478510634942	0.212249135494975	-2.70400054074671	-0.239429442888284	-1.4709771841391	0.190868268525468	-2.50252114394561	-1.72703424184439
AL1G45820	AT1G31750	OG0003101	.	protein_coding	proline-rich family protein	.	proline-rich family protein%3B BEST Arabidopsis thaliana protein match is: glycine-rich protein (TAIR:AT2G04063.1)%3B Has 30775 Blast hits to 15451 proteins in 908 species: Archae - 8%3B Bacteria - 4096%3B Metazoa - 13079%3B Fungi - 3329%3B Plants - 5909%3B Viruses - 858%3B Other Eukaryotes - 3496 (source: NCBI BLink).	.	proline-rich family protein%3B BEST Arabidopsis thaliana protein match is: glycine-rich protein (TAIR:AT2G04063.1)%3B Has 30775 Blast hits to 15451 proteins in 908 species: Archae - 8%3B Bacteria - 4096%3B Metazoa - 13079%3B Fungi - 3329%3B Plants - 5909%3B Viruses - 858%3B Other Eukaryotes - 3496 (source: NCBI BLink).	scaffold_1	14375200	14376635	1436	-	scaffold_1	14375051	14375414	364	*	0.342445604513102	-0.230531788216289	178.422950803873	0.380357142857143	6.63213590007172	6.3294734388E-5	26.6531	0.3096429	0.38035714	0.066243386	0.069516129	0.417142857	0.1075	NO	NO	NO	NO	NO	B	B	-3.74777422313574	-2.20322913428765	-4.9159658025186	-0.0665879640768545	-1.97643299370025	-0.469837950939344	-4.87215788030828	-0.0879688310463614	-1.54454508884809	-4.84937783844175
AL1G45820	AT1G31750	OG0003101	.	protein_coding	proline-rich family protein	.	proline-rich family protein%3B BEST Arabidopsis thaliana protein match is: glycine-rich protein (TAIR:AT2G04063.1)%3B Has 30775 Blast hits to 15451 proteins in 908 species: Archae - 8%3B Bacteria - 4096%3B Metazoa - 13079%3B Fungi - 3329%3B Plants - 5909%3B Viruses - 858%3B Other Eukaryotes - 3496 (source: NCBI BLink).	.	proline-rich family protein%3B BEST Arabidopsis thaliana protein match is: glycine-rich protein (TAIR:AT2G04063.1)%3B Has 30775 Blast hits to 15451 proteins in 908 species: Archae - 8%3B Bacteria - 4096%3B Metazoa - 13079%3B Fungi - 3329%3B Plants - 5909%3B Viruses - 858%3B Other Eukaryotes - 3496 (source: NCBI BLink).	scaffold_1	14375200	14376635	1436	-	scaffold_1	14377143	14377870	728	*	0.226799677191894	-0.209838663725935	148.345737931908	0.294642857142857	4.58303749063604	1.56814111364E-5	20.0268	-0.001964286	0.28660714	0.031216931	0.180887097	0.164285714	0.16625	NO	NO	NO	NO	NO	B	B	-4.4753417701822	-1.97282062623659	-1.51478510634942	0.212249135494975	-2.70400054074671	-0.239429442888284	-1.4709771841391	0.190868268525468	-2.50252114394561	-1.72703424184439
AL1G45820	AT1G31750	OG0003101	.	protein_coding	proline-rich family protein	.	proline-rich family protein%3B BEST Arabidopsis thaliana protein match is: glycine-rich protein (TAIR:AT2G04063.1)%3B Has 30775 Blast hits to 15451 proteins in 908 species: Archae - 8%3B Bacteria - 4096%3B Metazoa - 13079%3B Fungi - 3329%3B Plants - 5909%3B Viruses - 858%3B Other Eukaryotes - 3496 (source: NCBI BLink).	.	proline-rich family protein%3B BEST Arabidopsis thaliana protein match is: glycine-rich protein (TAIR:AT2G04063.1)%3B Has 30775 Blast hits to 15451 proteins in 908 species: Archae - 8%3B Bacteria - 4096%3B Metazoa - 13079%3B Fungi - 3329%3B Plants - 5909%3B Viruses - 858%3B Other Eukaryotes - 3496 (source: NCBI BLink).	scaffold_1	14375200	14376635	1436	-	scaffold_1	14378560	14379199	640	*	0.262309032689763	-0.201318135834987	145.312923159356	0.318214285714286	4.45461573840008	3.47844308701E-4	15.7343	0.1383929	0.31303571	0.058095238	0.132177419	0.307142857	0.16875	NO	NO	NO	NO	NO	B	B	-3.55375621059002	-1.56019362489027	-4.7207128366274	-0.473051994795985	-1.78241498115453	0.173197558458036	-4.67690491441708	-0.494432861765492	-1.99356258569975	-4.24766084183142
AL1G45820	AT1G31750	OG0003101	.	protein_coding	proline-rich family protein	.	proline-rich family protein%3B BEST Arabidopsis thaliana protein match is: glycine-rich protein (TAIR:AT2G04063.1)%3B Has 30775 Blast hits to 15451 proteins in 908 species: Archae - 8%3B Bacteria - 4096%3B Metazoa - 13079%3B Fungi - 3329%3B Plants - 5909%3B Viruses - 858%3B Other Eukaryotes - 3496 (source: NCBI BLink).	.	proline-rich family protein%3B BEST Arabidopsis thaliana protein match is: glycine-rich protein (TAIR:AT2G04063.1)%3B Has 30775 Blast hits to 15451 proteins in 908 species: Archae - 8%3B Bacteria - 4096%3B Metazoa - 13079%3B Fungi - 3329%3B Plants - 5909%3B Viruses - 858%3B Other Eukaryotes - 3496 (source: NCBI BLink).	scaffold_1	14375200	14376635	1436	-	scaffold_1	14376501	14377135	635	*	0.248250830978617	-0.190691613619744	142.465949187033	0.294910714285714	4.80142101144356	6.3294734388E-5	14.5037	0.06428571	0.29321429	0.058095238	0.109516129	0.184285714	0.12	NO	NO	NO	NO	NO	B	B	-3.63459704915074	-1.29665448169464	-2.44696055641061	0.812928061438258	-1.86325581971525	0.436736701653666	-2.40315263420029	0.791547194468751	-2.3379425674561	-3.25988861784887
AL1G45820	AT1G31750	OG0003101	.	protein_coding	proline-rich family protein	.	proline-rich family protein%3B BEST Arabidopsis thaliana protein match is: glycine-rich protein (TAIR:AT2G04063.1)%3B Has 30775 Blast hits to 15451 proteins in 908 species: Archae - 8%3B Bacteria - 4096%3B Metazoa - 13079%3B Fungi - 3329%3B Plants - 5909%3B Viruses - 858%3B Other Eukaryotes - 3496 (source: NCBI BLink).	.	proline-rich family protein%3B BEST Arabidopsis thaliana protein match is: glycine-rich protein (TAIR:AT2G04063.1)%3B Has 30775 Blast hits to 15451 proteins in 908 species: Archae - 8%3B Bacteria - 4096%3B Metazoa - 13079%3B Fungi - 3329%3B Plants - 5909%3B Viruses - 858%3B Other Eukaryotes - 3496 (source: NCBI BLink).	scaffold_1	14375200	14376635	1436	-	scaffold_1	14375445	14376492	1048	*	0.189347289697726	-0.189687014174205	123.702131357743	0.230803571428571	3.88854792521596	6.3294734388E-5	9.0362	-0.001785714	0.23035714	0.019365079	0.155483871	0.115714286	0.1175	NO	NO	NO	NO	NO	B	B	-4.74817960032462	-1.78156650517461	0.0582609656288239	0.721369610832591	-2.97683837088913	-0.0481753218263037	0.102068887839146	0.699988743863084	-2.96661309515001	-0.663108645203767
AL1G45820	AT1G31750	OG0003101	.	protein_coding	proline-rich family protein	.	proline-rich family protein%3B BEST Arabidopsis thaliana protein match is: glycine-rich protein (TAIR:AT2G04063.1)%3B Has 30775 Blast hits to 15451 proteins in 908 species: Archae - 8%3B Bacteria - 4096%3B Metazoa - 13079%3B Fungi - 3329%3B Plants - 5909%3B Viruses - 858%3B Other Eukaryotes - 3496 (source: NCBI BLink).	.	proline-rich family protein%3B BEST Arabidopsis thaliana protein match is: glycine-rich protein (TAIR:AT2G04063.1)%3B Has 30775 Blast hits to 15451 proteins in 908 species: Archae - 8%3B Bacteria - 4096%3B Metazoa - 13079%3B Fungi - 3329%3B Plants - 5909%3B Viruses - 858%3B Other Eukaryotes - 3496 (source: NCBI BLink).	scaffold_1	14375200	14376635	1436	-	scaffold_1	14376501	14377135	635	*	0.248250830978617	-0.190691613619744	142.465949187033	0.294910714285714	4.80142101144356	6.3294734388E-5	14.5037	0.06428571	0.29321429	0.058095238	0.109516129	0.184285714	0.12	NO	NO	NO	NO	NO	B	B	-3.63459704915074	-1.29665448169464	-2.44696055641061	0.812928061438258	-1.86325581971525	0.436736701653666	-2.40315263420029	0.791547194468751	-2.3379425674561	-3.25988861784887
AL1G45820	AT1G31750	OG0003101	.	protein_coding	proline-rich family protein	.	proline-rich family protein%3B BEST Arabidopsis thaliana protein match is: glycine-rich protein (TAIR:AT2G04063.1)%3B Has 30775 Blast hits to 15451 proteins in 908 species: Archae - 8%3B Bacteria - 4096%3B Metazoa - 13079%3B Fungi - 3329%3B Plants - 5909%3B Viruses - 858%3B Other Eukaryotes - 3496 (source: NCBI BLink).	.	proline-rich family protein%3B BEST Arabidopsis thaliana protein match is: glycine-rich protein (TAIR:AT2G04063.1)%3B Has 30775 Blast hits to 15451 proteins in 908 species: Archae - 8%3B Bacteria - 4096%3B Metazoa - 13079%3B Fungi - 3329%3B Plants - 5909%3B Viruses - 858%3B Other Eukaryotes - 3496 (source: NCBI BLink).	scaffold_1	14375200	14376635	1436	-	scaffold_1	14378560	14379199	640	*	0.262309032689763	-0.201318135834987	145.312923159356	0.318214285714286	4.45461573840008	3.47844308701E-4	15.7343	0.1383929	0.31303571	0.058095238	0.132177419	0.307142857	0.16875	NO	NO	NO	NO	NO	B	B	-3.55375621059002	-1.56019362489027	-4.7207128366274	-0.473051994795985	-1.78241498115453	0.173197558458036	-4.67690491441708	-0.494432861765492	-1.99356258569975	-4.24766084183142
AL1G45820	AT1G31750	OG0003101	.	protein_coding	proline-rich family protein	.	proline-rich family protein%3B BEST Arabidopsis thaliana protein match is: glycine-rich protein (TAIR:AT2G04063.1)%3B Has 30775 Blast hits to 15451 proteins in 908 species: Archae - 8%3B Bacteria - 4096%3B Metazoa - 13079%3B Fungi - 3329%3B Plants - 5909%3B Viruses - 858%3B Other Eukaryotes - 3496 (source: NCBI BLink).	.	proline-rich family protein%3B BEST Arabidopsis thaliana protein match is: glycine-rich protein (TAIR:AT2G04063.1)%3B Has 30775 Blast hits to 15451 proteins in 908 species: Archae - 8%3B Bacteria - 4096%3B Metazoa - 13079%3B Fungi - 3329%3B Plants - 5909%3B Viruses - 858%3B Other Eukaryotes - 3496 (source: NCBI BLink).	scaffold_1	14375200	14376635	1436	-	scaffold_1	14377143	14377870	728	*	0.226799677191894	-0.209838663725935	148.345737931908	0.294642857142857	4.58303749063604	1.56814111364E-5	20.0268	-0.001964286	0.28660714	0.031216931	0.180887097	0.164285714	0.16625	NO	NO	NO	NO	NO	B	B	-4.4753417701822	-1.97282062623659	-1.51478510634942	0.212249135494975	-2.70400054074671	-0.239429442888284	-1.4709771841391	0.190868268525468	-2.50252114394561	-1.72703424184439
AL1G45820	AT1G31750	OG0003101	.	protein_coding	proline-rich family protein	.	proline-rich family protein%3B BEST Arabidopsis thaliana protein match is: glycine-rich protein (TAIR:AT2G04063.1)%3B Has 30775 Blast hits to 15451 proteins in 908 species: Archae - 8%3B Bacteria - 4096%3B Metazoa - 13079%3B Fungi - 3329%3B Plants - 5909%3B Viruses - 858%3B Other Eukaryotes - 3496 (source: NCBI BLink).	.	proline-rich family protein%3B BEST Arabidopsis thaliana protein match is: glycine-rich protein (TAIR:AT2G04063.1)%3B Has 30775 Blast hits to 15451 proteins in 908 species: Archae - 8%3B Bacteria - 4096%3B Metazoa - 13079%3B Fungi - 3329%3B Plants - 5909%3B Viruses - 858%3B Other Eukaryotes - 3496 (source: NCBI BLink).	scaffold_1	14375200	14376635	1436	-	scaffold_1	14375051	14375414	364	*	0.342445604513102	-0.230531788216289	178.422950803873	0.380357142857143	6.63213590007172	6.3294734388E-5	26.6531	0.3096429	0.38035714	0.066243386	0.069516129	0.417142857	0.1075	NO	NO	NO	NO	NO	B	B	-3.74777422313574	-2.20322913428765	-4.9159658025186	-0.0665879640768545	-1.97643299370025	-0.469837950939344	-4.87215788030828	-0.0879688310463614	-1.54454508884809	-4.84937783844175
AL1G45820	AT1G31750	OG0003101	.	protein_coding	proline-rich family protein	.	proline-rich family protein%3B BEST Arabidopsis thaliana protein match is: glycine-rich protein (TAIR:AT2G04063.1)%3B Has 30775 Blast hits to 15451 proteins in 908 species: Archae - 8%3B Bacteria - 4096%3B Metazoa - 13079%3B Fungi - 3329%3B Plants - 5909%3B Viruses - 858%3B Other Eukaryotes - 3496 (source: NCBI BLink).	.	proline-rich family protein%3B BEST Arabidopsis thaliana protein match is: glycine-rich protein (TAIR:AT2G04063.1)%3B Has 30775 Blast hits to 15451 proteins in 908 species: Archae - 8%3B Bacteria - 4096%3B Metazoa - 13079%3B Fungi - 3329%3B Plants - 5909%3B Viruses - 858%3B Other Eukaryotes - 3496 (source: NCBI BLink).	scaffold_1	14375200	14376635	1436	-	scaffold_1	14375051	14375414	364	*	0.342445604513102	-0.230531788216289	178.422950803873	0.380357142857143	6.63213590007172	6.3294734388E-5	26.6531	0.3096429	0.38035714	0.066243386	0.069516129	0.417142857	0.1075	NO	NO	NO	NO	NO	C	B	-3.74777422313574	-2.20322913428765	-4.9159658025186	-0.0665879640768545	-1.97643299370025	-0.469837950939344	-4.87215788030828	-0.0879688310463614	-1.54454508884809	-4.84937783844175
AL1G45820	AT1G31750	OG0003101	.	protein_coding	proline-rich family protein	.	proline-rich family protein%3B BEST Arabidopsis thaliana protein match is: glycine-rich protein (TAIR:AT2G04063.1)%3B Has 30775 Blast hits to 15451 proteins in 908 species: Archae - 8%3B Bacteria - 4096%3B Metazoa - 13079%3B Fungi - 3329%3B Plants - 5909%3B Viruses - 858%3B Other Eukaryotes - 3496 (source: NCBI BLink).	.	proline-rich family protein%3B BEST Arabidopsis thaliana protein match is: glycine-rich protein (TAIR:AT2G04063.1)%3B Has 30775 Blast hits to 15451 proteins in 908 species: Archae - 8%3B Bacteria - 4096%3B Metazoa - 13079%3B Fungi - 3329%3B Plants - 5909%3B Viruses - 858%3B Other Eukaryotes - 3496 (source: NCBI BLink).	scaffold_1	14375200	14376635	1436	-	scaffold_1	14376501	14377135	635	*	0.248250830978617	-0.190691613619744	142.465949187033	0.294910714285714	4.80142101144356	6.3294734388E-5	14.5037	0.06428571	0.29321429	0.058095238	0.109516129	0.184285714	0.12	NO	NO	NO	NO	NO	B	B	-3.63459704915074	-1.29665448169464	-2.44696055641061	0.812928061438258	-1.86325581971525	0.436736701653666	-2.40315263420029	0.791547194468751	-2.3379425674561	-3.25988861784887
AL1G45820	AT1G31750	OG0003101	.	protein_coding	proline-rich family protein	.	proline-rich family protein%3B BEST Arabidopsis thaliana protein match is: glycine-rich protein (TAIR:AT2G04063.1)%3B Has 30775 Blast hits to 15451 proteins in 908 species: Archae - 8%3B Bacteria - 4096%3B Metazoa - 13079%3B Fungi - 3329%3B Plants - 5909%3B Viruses - 858%3B Other Eukaryotes - 3496 (source: NCBI BLink).	.	proline-rich family protein%3B BEST Arabidopsis thaliana protein match is: glycine-rich protein (TAIR:AT2G04063.1)%3B Has 30775 Blast hits to 15451 proteins in 908 species: Archae - 8%3B Bacteria - 4096%3B Metazoa - 13079%3B Fungi - 3329%3B Plants - 5909%3B Viruses - 858%3B Other Eukaryotes - 3496 (source: NCBI BLink).	scaffold_1	14375200	14376635	1436	-	scaffold_1	14375051	14375414	364	*	0.342445604513102	-0.230531788216289	178.422950803873	0.380357142857143	6.63213590007172	6.3294734388E-5	26.6531	0.3096429	0.38035714	0.066243386	0.069516129	0.417142857	0.1075	NO	NO	NO	NO	NO	B	B	-3.74777422313574	-2.20322913428765	-4.9159658025186	-0.0665879640768545	-1.97643299370025	-0.469837950939344	-4.87215788030828	-0.0879688310463614	-1.54454508884809	-4.84937783844175
AL1G45820	AT1G31750	OG0003101	.	protein_coding	proline-rich family protein	.	proline-rich family protein%3B BEST Arabidopsis thaliana protein match is: glycine-rich protein (TAIR:AT2G04063.1)%3B Has 30775 Blast hits to 15451 proteins in 908 species: Archae - 8%3B Bacteria - 4096%3B Metazoa - 13079%3B Fungi - 3329%3B Plants - 5909%3B Viruses - 858%3B Other Eukaryotes - 3496 (source: NCBI BLink).	.	proline-rich family protein%3B BEST Arabidopsis thaliana protein match is: glycine-rich protein (TAIR:AT2G04063.1)%3B Has 30775 Blast hits to 15451 proteins in 908 species: Archae - 8%3B Bacteria - 4096%3B Metazoa - 13079%3B Fungi - 3329%3B Plants - 5909%3B Viruses - 858%3B Other Eukaryotes - 3496 (source: NCBI BLink).	scaffold_1	14375200	14376635	1436	-	scaffold_1	14375051	14375414	364	*	0.342445604513102	-0.230531788216289	178.422950803873	0.380357142857143	6.63213590007172	6.3294734388E-5	26.6531	0.3096429	0.38035714	0.066243386	0.069516129	0.417142857	0.1075	NO	NO	NO	NO	NO	B	B	-3.74777422313574	-2.20322913428765	-4.9159658025186	-0.0665879640768545	-1.97643299370025	-0.469837950939344	-4.87215788030828	-0.0879688310463614	-1.54454508884809	-4.84937783844175
AL1G45820	AT1G31750	OG0003101	.	protein_coding	proline-rich family protein	.	proline-rich family protein%3B BEST Arabidopsis thaliana protein match is: glycine-rich protein (TAIR:AT2G04063.1)%3B Has 30775 Blast hits to 15451 proteins in 908 species: Archae - 8%3B Bacteria - 4096%3B Metazoa - 13079%3B Fungi - 3329%3B Plants - 5909%3B Viruses - 858%3B Other Eukaryotes - 3496 (source: NCBI BLink).	.	proline-rich family protein%3B BEST Arabidopsis thaliana protein match is: glycine-rich protein (TAIR:AT2G04063.1)%3B Has 30775 Blast hits to 15451 proteins in 908 species: Archae - 8%3B Bacteria - 4096%3B Metazoa - 13079%3B Fungi - 3329%3B Plants - 5909%3B Viruses - 858%3B Other Eukaryotes - 3496 (source: NCBI BLink).	scaffold_1	14375200	14376635	1436	-	scaffold_1	14378560	14379199	640	*	0.262309032689763	-0.201318135834987	145.312923159356	0.318214285714286	4.45461573840008	3.47844308701E-4	15.7343	0.1383929	0.31303571	0.058095238	0.132177419	0.307142857	0.16875	NO	NO	NO	NO	NO	B	A	-3.55375621059002	-1.56019362489027	-4.7207128366274	-0.473051994795985	-1.78241498115453	0.173197558458036	-4.67690491441708	-0.494432861765492	-1.99356258569975	-4.24766084183142
AL1G45830	AT1G31760	OG0013089	.	protein_coding	SWIB/MDM2 domain superfamily protein	.	SWIB/MDM2 domain superfamily protein%3B CONTAINS InterPro DOMAIN/s: SWIB/MDM2 domain (InterPro:IPR003121)%2C SWIB domain (InterPro:IPR019835)%3B BEST Arabidopsis thaliana protein match is: SWIB/MDM2 domain superfamily protein (TAIR:AT2G35605.1)%3B Has 990 Blast hits to 904 proteins in 230 species: Archae - 0%3B Bacteria - 216%3B Metazoa - 58%3B Fungi - 182%3B Plants - 383%3B Viruses - 6%3B Other …	.	SWIB/MDM2 domain superfamily protein%3B CONTAINS InterPro DOMAIN/s: SWIB/MDM2 domain (InterPro:IPR003121)%2C SWIB domain (InterPro:IPR019835)%3B BEST Arabidopsis thaliana protein match is: SWIB/MDM2 domain superfamily protein (TAIR:AT2G35605.1)%3B Has 990 Blast hits to 904 proteins in 230 species: Archae - 0%3B Bacteria - 216%3B Metazoa - 58%3B Fungi - 182%3B Plants - 383%3B Viruses - 6%3B Other …	scaffold_1	14376815	14378605	1791	-	scaffold_1	14376501	14377135	635	*	0.248250830978617	-0.190691613619744	142.465949187033	0.294910714285714	4.80142101144356	6.3294734388E-5	14.5037	0.06428571	0.29321429	0.058095238	0.109516129	0.184285714	0.12	NO	NO	NO	NO	NO	C	B	-3.63459704915074	-1.29665448169464	-2.44696055641061	0.812928061438258	-1.86325581971525	0.436736701653666	-2.40315263420029	0.791547194468751	-2.3379425674561	-3.25988861784887
AL1G45830	AT1G31760	OG0013089	.	protein_coding	SWIB/MDM2 domain superfamily protein	.	SWIB/MDM2 domain superfamily protein%3B CONTAINS InterPro DOMAIN/s: SWIB/MDM2 domain (InterPro:IPR003121)%2C SWIB domain (InterPro:IPR019835)%3B BEST Arabidopsis thaliana protein match is: SWIB/MDM2 domain superfamily protein (TAIR:AT2G35605.1)%3B Has 990 Blast hits to 904 proteins in 230 species: Archae - 0%3B Bacteria - 216%3B Metazoa - 58%3B Fungi - 182%3B Plants - 383%3B Viruses - 6%3B Other …	.	SWIB/MDM2 domain superfamily protein%3B CONTAINS InterPro DOMAIN/s: SWIB/MDM2 domain (InterPro:IPR003121)%2C SWIB domain (InterPro:IPR019835)%3B BEST Arabidopsis thaliana protein match is: SWIB/MDM2 domain superfamily protein (TAIR:AT2G35605.1)%3B Has 990 Blast hits to 904 proteins in 230 species: Archae - 0%3B Bacteria - 216%3B Metazoa - 58%3B Fungi - 182%3B Plants - 383%3B Viruses - 6%3B Other …	scaffold_1	14376815	14378605	1791	-	scaffold_1	14377143	14377870	728	*	0.226799677191894	-0.209838663725935	148.345737931908	0.294642857142857	4.58303749063604	1.56814111364E-5	20.0268	-0.001964286	0.28660714	0.031216931	0.180887097	0.164285714	0.16625	NO	NO	NO	NO	NO	C	B	-4.4753417701822	-1.97282062623659	-1.51478510634942	0.212249135494975	-2.70400054074671	-0.239429442888284	-1.4709771841391	0.190868268525468	-2.50252114394561	-1.72703424184439
AL1G45830	AT1G31760	OG0013089	.	protein_coding	SWIB/MDM2 domain superfamily protein	.	SWIB/MDM2 domain superfamily protein%3B CONTAINS InterPro DOMAIN/s: SWIB/MDM2 domain (InterPro:IPR003121)%2C SWIB domain (InterPro:IPR019835)%3B BEST Arabidopsis thaliana protein match is: SWIB/MDM2 domain superfamily protein (TAIR:AT2G35605.1)%3B Has 990 Blast hits to 904 proteins in 230 species: Archae - 0%3B Bacteria - 216%3B Metazoa - 58%3B Fungi - 182%3B Plants - 383%3B Viruses - 6%3B Other …	.	SWIB/MDM2 domain superfamily protein%3B CONTAINS InterPro DOMAIN/s: SWIB/MDM2 domain (InterPro:IPR003121)%2C SWIB domain (InterPro:IPR019835)%3B BEST Arabidopsis thaliana protein match is: SWIB/MDM2 domain superfamily protein (TAIR:AT2G35605.1)%3B Has 990 Blast hits to 904 proteins in 230 species: Archae - 0%3B Bacteria - 216%3B Metazoa - 58%3B Fungi - 182%3B Plants - 383%3B Viruses - 6%3B Other …	scaffold_1	14376815	14378605	1791	-	scaffold_1	14376501	14377135	635	*	0.248250830978617	-0.190691613619744	142.465949187033	0.294910714285714	4.80142101144356	6.3294734388E-5	14.5037	0.06428571	0.29321429	0.058095238	0.109516129	0.184285714	0.12	NO	NO	NO	NO	NO	C	B	-3.63459704915074	-1.29665448169464	-2.44696055641061	0.812928061438258	-1.86325581971525	0.436736701653666	-2.40315263420029	0.791547194468751	-2.3379425674561	-3.25988861784887
AL1G45830	AT1G31760	OG0013089	.	protein_coding	SWIB/MDM2 domain superfamily protein	.	SWIB/MDM2 domain superfamily protein%3B CONTAINS InterPro DOMAIN/s: SWIB/MDM2 domain (InterPro:IPR003121)%2C SWIB domain (InterPro:IPR019835)%3B BEST Arabidopsis thaliana protein match is: SWIB/MDM2 domain superfamily protein (TAIR:AT2G35605.1)%3B Has 990 Blast hits to 904 proteins in 230 species: Archae - 0%3B Bacteria - 216%3B Metazoa - 58%3B Fungi - 182%3B Plants - 383%3B Viruses - 6%3B Other …	.	SWIB/MDM2 domain superfamily protein%3B CONTAINS InterPro DOMAIN/s: SWIB/MDM2 domain (InterPro:IPR003121)%2C SWIB domain (InterPro:IPR019835)%3B BEST Arabidopsis thaliana protein match is: SWIB/MDM2 domain superfamily protein (TAIR:AT2G35605.1)%3B Has 990 Blast hits to 904 proteins in 230 species: Archae - 0%3B Bacteria - 216%3B Metazoa - 58%3B Fungi - 182%3B Plants - 383%3B Viruses - 6%3B Other …	scaffold_1	14376815	14378605	1791	-	scaffold_1	14379202	14379577	376	*	0.310839745379656	-0.231623674942686	211.531445755972	0.399017857142857	5.00741902486355	3.47844308701E-4	9.8982	0.1201786	0.38589286	0.068465608	0.165887097	0.341428571	0.22125	NO	NO	NO	NO	NO	C	B	-3.71341686674744	-1.77554275333014	-4.33808000830838	-0.60484067369809	-1.94207563731195	-0.0421515699818338	-4.29427208609806	-0.626221540667597	-1.9378741134173	-3.73323933461029
AL1G45830	AT1G31760	OG0013089	.	protein_coding	SWIB/MDM2 domain superfamily protein	.	SWIB/MDM2 domain superfamily protein%3B CONTAINS InterPro DOMAIN/s: SWIB/MDM2 domain (InterPro:IPR003121)%2C SWIB domain (InterPro:IPR019835)%3B BEST Arabidopsis thaliana protein match is: SWIB/MDM2 domain superfamily protein (TAIR:AT2G35605.1)%3B Has 990 Blast hits to 904 proteins in 230 species: Archae - 0%3B Bacteria - 216%3B Metazoa - 58%3B Fungi - 182%3B Plants - 383%3B Viruses - 6%3B Other …	.	SWIB/MDM2 domain superfamily protein%3B CONTAINS InterPro DOMAIN/s: SWIB/MDM2 domain (InterPro:IPR003121)%2C SWIB domain (InterPro:IPR019835)%3B BEST Arabidopsis thaliana protein match is: SWIB/MDM2 domain superfamily protein (TAIR:AT2G35605.1)%3B Has 990 Blast hits to 904 proteins in 230 species: Archae - 0%3B Bacteria - 216%3B Metazoa - 58%3B Fungi - 182%3B Plants - 383%3B Viruses - 6%3B Other …	scaffold_1	14376815	14378605	1791	-	scaffold_1	14378560	14379199	640	*	0.262309032689763	-0.201318135834987	145.312923159356	0.318214285714286	4.45461573840008	3.47844308701E-4	15.7343	0.1383929	0.31303571	0.058095238	0.132177419	0.307142857	0.16875	NO	NO	NO	NO	NO	C	B	-3.55375621059002	-1.56019362489027	-4.7207128366274	-0.473051994795985	-1.78241498115453	0.173197558458036	-4.67690491441708	-0.494432861765492	-1.99356258569975	-4.24766084183142
AL1G45830	AT1G31760	OG0013089	.	protein_coding	SWIB/MDM2 domain superfamily protein	.	SWIB/MDM2 domain superfamily protein%3B CONTAINS InterPro DOMAIN/s: SWIB/MDM2 domain (InterPro:IPR003121)%2C SWIB domain (InterPro:IPR019835)%3B BEST Arabidopsis thaliana protein match is: SWIB/MDM2 domain superfamily protein (TAIR:AT2G35605.1)%3B Has 990 Blast hits to 904 proteins in 230 species: Archae - 0%3B Bacteria - 216%3B Metazoa - 58%3B Fungi - 182%3B Plants - 383%3B Viruses - 6%3B Other …	.	SWIB/MDM2 domain superfamily protein%3B CONTAINS InterPro DOMAIN/s: SWIB/MDM2 domain (InterPro:IPR003121)%2C SWIB domain (InterPro:IPR019835)%3B BEST Arabidopsis thaliana protein match is: SWIB/MDM2 domain superfamily protein (TAIR:AT2G35605.1)%3B Has 990 Blast hits to 904 proteins in 230 species: Archae - 0%3B Bacteria - 216%3B Metazoa - 58%3B Fungi - 182%3B Plants - 383%3B Viruses - 6%3B Other …	scaffold_1	14376815	14378605	1791	-	scaffold_1	14379202	14379577	376	*	0.310839745379656	-0.231623674942686	211.531445755972	0.399017857142857	5.00741902486355	3.47844308701E-4	9.8982	0.1201786	0.38589286	0.068465608	0.165887097	0.341428571	0.22125	NO	NO	NO	NO	NO	C	B	-3.71341686674744	-1.77554275333014	-4.33808000830838	-0.60484067369809	-1.94207563731195	-0.0421515699818338	-4.29427208609806	-0.626221540667597	-1.9378741134173	-3.73323933461029
AL1G45830	AT1G31760	OG0013089	.	protein_coding	SWIB/MDM2 domain superfamily protein	.	SWIB/MDM2 domain superfamily protein%3B CONTAINS InterPro DOMAIN/s: SWIB/MDM2 domain (InterPro:IPR003121)%2C SWIB domain (InterPro:IPR019835)%3B BEST Arabidopsis thaliana protein match is: SWIB/MDM2 domain superfamily protein (TAIR:AT2G35605.1)%3B Has 990 Blast hits to 904 proteins in 230 species: Archae - 0%3B Bacteria - 216%3B Metazoa - 58%3B Fungi - 182%3B Plants - 383%3B Viruses - 6%3B Other …	.	SWIB/MDM2 domain superfamily protein%3B CONTAINS InterPro DOMAIN/s: SWIB/MDM2 domain (InterPro:IPR003121)%2C SWIB domain (InterPro:IPR019835)%3B BEST Arabidopsis thaliana protein match is: SWIB/MDM2 domain superfamily protein (TAIR:AT2G35605.1)%3B Has 990 Blast hits to 904 proteins in 230 species: Archae - 0%3B Bacteria - 216%3B Metazoa - 58%3B Fungi - 182%3B Plants - 383%3B Viruses - 6%3B Other …	scaffold_1	14376815	14378605	1791	-	scaffold_1	14379202	14379577	376	*	0.310839745379656	-0.231623674942686	211.531445755972	0.399017857142857	5.00741902486355	3.47844308701E-4	9.8982	0.1201786	0.38589286	0.068465608	0.165887097	0.341428571	0.22125	NO	NO	NO	NO	NO	C	B	-3.71341686674744	-1.77554275333014	-4.33808000830838	-0.60484067369809	-1.94207563731195	-0.0421515699818338	-4.29427208609806	-0.626221540667597	-1.9378741134173	-3.73323933461029
AL1G45830	AT1G31760	OG0013089	.	protein_coding	SWIB/MDM2 domain superfamily protein	.	SWIB/MDM2 domain superfamily protein%3B CONTAINS InterPro DOMAIN/s: SWIB/MDM2 domain (InterPro:IPR003121)%2C SWIB domain (InterPro:IPR019835)%3B BEST Arabidopsis thaliana protein match is: SWIB/MDM2 domain superfamily protein (TAIR:AT2G35605.1)%3B Has 990 Blast hits to 904 proteins in 230 species: Archae - 0%3B Bacteria - 216%3B Metazoa - 58%3B Fungi - 182%3B Plants - 383%3B Viruses - 6%3B Other …	.	SWIB/MDM2 domain superfamily protein%3B CONTAINS InterPro DOMAIN/s: SWIB/MDM2 domain (InterPro:IPR003121)%2C SWIB domain (InterPro:IPR019835)%3B BEST Arabidopsis thaliana protein match is: SWIB/MDM2 domain superfamily protein (TAIR:AT2G35605.1)%3B Has 990 Blast hits to 904 proteins in 230 species: Archae - 0%3B Bacteria - 216%3B Metazoa - 58%3B Fungi - 182%3B Plants - 383%3B Viruses - 6%3B Other …	scaffold_1	14376815	14378605	1791	-	scaffold_1	14378560	14379199	640	*	0.262309032689763	-0.201318135834987	145.312923159356	0.318214285714286	4.45461573840008	3.47844308701E-4	15.7343	0.1383929	0.31303571	0.058095238	0.132177419	0.307142857	0.16875	NO	NO	NO	NO	NO	C	B	-3.55375621059002	-1.56019362489027	-4.7207128366274	-0.473051994795985	-1.78241498115453	0.173197558458036	-4.67690491441708	-0.494432861765492	-1.99356258569975	-4.24766084183142
AL1G45830	AT1G31760	OG0013089	.	protein_coding	SWIB/MDM2 domain superfamily protein	.	SWIB/MDM2 domain superfamily protein%3B CONTAINS InterPro DOMAIN/s: SWIB/MDM2 domain (InterPro:IPR003121)%2C SWIB domain (InterPro:IPR019835)%3B BEST Arabidopsis thaliana protein match is: SWIB/MDM2 domain superfamily protein (TAIR:AT2G35605.1)%3B Has 990 Blast hits to 904 proteins in 230 species: Archae - 0%3B Bacteria - 216%3B Metazoa - 58%3B Fungi - 182%3B Plants - 383%3B Viruses - 6%3B Other …	.	SWIB/MDM2 domain superfamily protein%3B CONTAINS InterPro DOMAIN/s: SWIB/MDM2 domain (InterPro:IPR003121)%2C SWIB domain (InterPro:IPR019835)%3B BEST Arabidopsis thaliana protein match is: SWIB/MDM2 domain superfamily protein (TAIR:AT2G35605.1)%3B Has 990 Blast hits to 904 proteins in 230 species: Archae - 0%3B Bacteria - 216%3B Metazoa - 58%3B Fungi - 182%3B Plants - 383%3B Viruses - 6%3B Other …	scaffold_1	14376815	14378605	1791	-	scaffold_1	14377143	14377870	728	*	0.226799677191894	-0.209838663725935	148.345737931908	0.294642857142857	4.58303749063604	1.56814111364E-5	20.0268	-0.001964286	0.28660714	0.031216931	0.180887097	0.164285714	0.16625	NO	NO	NO	NO	NO	C	B	-4.4753417701822	-1.97282062623659	-1.51478510634942	0.212249135494975	-2.70400054074671	-0.239429442888284	-1.4709771841391	0.190868268525468	-2.50252114394561	-1.72703424184439
AL1G45840	AT1G31770	OG0013088	ABCG14	protein_coding	ATP-binding cassette 14	ATP-binding cassette G14	ATP-binding cassette 14 (ABCG14)%3B FUNCTIONS IN: ATPase activity%2C coupled to transmembrane movement of substances%3B LOCATED IN: membrane%3B EXPRESSED IN: 23 plant structures%3B EXPRESSED DURING: 13 growth stages%3B CONTAINS InterPro DOMAIN/s: ATPase%2C AAA+ type%2C core (InterPro:IPR003593)%2C ABC transporter-like (InterPro:IPR003439)%2C ABC-2 type transporter (InterPro:IPR013525)%2C ABC tran…	.	ATP-binding cassette 14 (ABCG14)%3B FUNCTIONS IN: ATPase activity%2C coupled to transmembrane movement of substances%3B LOCATED IN: membrane%3B EXPRESSED IN: 23 plant structures%3B EXPRESSED DURING: 13 growth stages%3B CONTAINS InterPro DOMAIN/s: ATPase%2C AAA+ type%2C core (InterPro:IPR003593)%2C ABC transporter-like (InterPro:IPR003439)%2C ABC-2 type transporter (InterPro:IPR013525)%2C ABC tran…	scaffold_1	14379380	14382265	2886	-	scaffold_1	14379202	14379577	376	*	0.310839745379656	-0.231623674942686	211.531445755972	0.399017857142857	5.00741902486355	3.47844308701E-4	9.8982	0.1201786	0.38589286	0.068465608	0.165887097	0.341428571	0.22125	NO	NO	NO	NO	NO	C	B	-3.71341686674744	-1.77554275333014	-4.33808000830838	-0.60484067369809	-1.94207563731195	-0.0421515699818338	-4.29427208609806	-0.626221540667597	-1.9378741134173	-3.73323933461029
AL1G53750	AT1G47510	OG0014539	5PTASE11	protein_coding	inositol polyphosphate 5-phosphatase 11	inositol polyphosphate 5-phosphatase 11	inositol polyphosphate 5-phosphatase 11 (5PTASE11)%3B FUNCTIONS IN: hydrolase activity%2C phosphatidylinositol-3%2C4%2C5-trisphosphate 5-phosphatase activity%2C phosphatidylinositol-4%2C5-bisphosphate 5-phosphatase activity%2C phosphatidylinositol-3%2C5-bisphosphate 5-phosphatase activity%3B INVOLVED IN: response to jasmonic acid stimulus%2C response to auxin stimulus%2C N-terminal protein myrist…	Encodes a phosphatidylinositol polyphosphate 5-phosphatase. It can dephosphorylate PI(4%2C5)P2%2C PI(3%2C5)P2%2C and PI(3%2C4%2C5)P3%2C but%2C it is not active against PI(5)P or the water soluble inositol(1%2C4%2C5)P3 or inositol(1%2C3%2C4%2C5)P4. The transcript levels for this gene rise in response to auxin%2C ABA%2C and JA.	inositol polyphosphate 5-phosphatase 11 (5PTASE11)%3B FUNCTIONS IN: hydrolase activity%2C phosphatidylinositol-3%2C4%2C5-trisphosphate 5-phosphatase activity%2C phosphatidylinositol-4%2C5-bisphosphate 5-phosphatase activity%2C phosphatidylinositol-3%2C5-bisphosphate 5-phosphatase activity%3B INVOLVED IN: response to jasmonic acid stimulus%2C response to auxin stimulus%2C N-terminal protein myrist…	scaffold_1	23695735	23699520	3786	-	scaffold_1	23696024	23696853	830	*	0.30452331331297	-0.0996038087503996	207.793216761165	0.400178571428571	4.34247494893735	0.00129979298925	11.1221	-0.2575	0.38607143	0.224973545	0.05483871	0.16	0.4175	NO	NO	NO	NO	NO	B	B	-2.12085234710131	-2.12190848438727	0.826675863652231	-0.479988241053989	-0.349511117665824	-0.388517301038964	0.870483785862553	-0.501369108023496	0.0010561372859601	1.30666410470622
AL1G53750	AT1G47510	OG0014539	5PTASE11	protein_coding	inositol polyphosphate 5-phosphatase 11	inositol polyphosphate 5-phosphatase 11	inositol polyphosphate 5-phosphatase 11 (5PTASE11)%3B FUNCTIONS IN: hydrolase activity%2C phosphatidylinositol-3%2C4%2C5-trisphosphate 5-phosphatase activity%2C phosphatidylinositol-4%2C5-bisphosphate 5-phosphatase activity%2C phosphatidylinositol-3%2C5-bisphosphate 5-phosphatase activity%3B INVOLVED IN: response to jasmonic acid stimulus%2C response to auxin stimulus%2C N-terminal protein myrist…	Encodes a phosphatidylinositol polyphosphate 5-phosphatase. It can dephosphorylate PI(4%2C5)P2%2C PI(3%2C5)P2%2C and PI(3%2C4%2C5)P3%2C but%2C it is not active against PI(5)P or the water soluble inositol(1%2C4%2C5)P3 or inositol(1%2C3%2C4%2C5)P4. The transcript levels for this gene rise in response to auxin%2C ABA%2C and JA.	inositol polyphosphate 5-phosphatase 11 (5PTASE11)%3B FUNCTIONS IN: hydrolase activity%2C phosphatidylinositol-3%2C4%2C5-trisphosphate 5-phosphatase activity%2C phosphatidylinositol-4%2C5-bisphosphate 5-phosphatase activity%2C phosphatidylinositol-3%2C5-bisphosphate 5-phosphatase activity%3B INVOLVED IN: response to jasmonic acid stimulus%2C response to auxin stimulus%2C N-terminal protein myrist…	scaffold_1	23695735	23699520	3786	-	scaffold_1	23696024	23696853	830	*	0.30452331331297	-0.0996038087503996	207.793216761165	0.400178571428571	4.34247494893735	0.00129979298925	11.1221	-0.2575	0.38607143	0.224973545	0.05483871	0.16	0.4175	NO	NO	NO	NO	NO	B	B	-2.12085234710131	-2.12190848438727	0.826675863652231	-0.479988241053989	-0.349511117665824	-0.388517301038964	0.870483785862553	-0.501369108023496	0.0010561372859601	1.30666410470622
AL1G53750	AT1G47510	OG0014539	5PTASE11	protein_coding	inositol polyphosphate 5-phosphatase 11	inositol polyphosphate 5-phosphatase 11	inositol polyphosphate 5-phosphatase 11 (5PTASE11)%3B FUNCTIONS IN: hydrolase activity%2C phosphatidylinositol-3%2C4%2C5-trisphosphate 5-phosphatase activity%2C phosphatidylinositol-4%2C5-bisphosphate 5-phosphatase activity%2C phosphatidylinositol-3%2C5-bisphosphate 5-phosphatase activity%3B INVOLVED IN: response to jasmonic acid stimulus%2C response to auxin stimulus%2C N-terminal protein myrist…	Encodes a phosphatidylinositol polyphosphate 5-phosphatase. It can dephosphorylate PI(4%2C5)P2%2C PI(3%2C5)P2%2C and PI(3%2C4%2C5)P3%2C but%2C it is not active against PI(5)P or the water soluble inositol(1%2C4%2C5)P3 or inositol(1%2C3%2C4%2C5)P4. The transcript levels for this gene rise in response to auxin%2C ABA%2C and JA.	inositol polyphosphate 5-phosphatase 11 (5PTASE11)%3B FUNCTIONS IN: hydrolase activity%2C phosphatidylinositol-3%2C4%2C5-trisphosphate 5-phosphatase activity%2C phosphatidylinositol-4%2C5-bisphosphate 5-phosphatase activity%2C phosphatidylinositol-3%2C5-bisphosphate 5-phosphatase activity%3B INVOLVED IN: response to jasmonic acid stimulus%2C response to auxin stimulus%2C N-terminal protein myrist…	scaffold_1	23695735	23699520	3786	-	scaffold_1	23696024	23696853	830	*	0.30452331331297	-0.0996038087503996	207.793216761165	0.400178571428571	4.34247494893735	0.00129979298925	11.1221	-0.2575	0.38607143	0.224973545	0.05483871	0.16	0.4175	NO	NO	NO	NO	NO	B	B	-2.12085234710131	-2.12190848438727	0.826675863652231	-0.479988241053989	-0.349511117665824	-0.388517301038964	0.870483785862553	-0.501369108023496	0.0010561372859601	1.30666410470622
AL1G53790	AT1G47550	OG0003213	SEC3A	protein_coding	exocyst complex component sec3A	exocyst complex component sec3A	exocyst complex component sec3A (SEC3A)%3B INVOLVED IN: biological_process unknown%3B LOCATED IN: plasma membrane%2C exocyst%3B EXPRESSED IN: male gametophyte%2C cultured cell%2C pollen tube%3B EXPRESSED DURING: L mature pollen stage%2C M germinated pollen stage%3B CONTAINS InterPro DOMAIN/s: Exocyst complex%2C component Exoc1 (InterPro:IPR019160)%3B BEST Arabidopsis thaliana protein match is: ex…	Encodes a member of the exocyst complex gene family. The exocyst is a protein complex involved in tethering vesicles to the plasma membrane during regulated or polarized secretion.	exocyst complex component sec3A (SEC3A)%3B INVOLVED IN: biological_process unknown%3B LOCATED IN: plasma membrane%2C exocyst%3B EXPRESSED IN: male gametophyte%2C cultured cell%2C pollen tube%3B EXPRESSED DURING: L mature pollen stage%2C M germinated pollen stage%3B CONTAINS InterPro DOMAIN/s: Exocyst complex%2C component Exoc1 (InterPro:IPR019160)%3B BEST Arabidopsis thaliana protein match is: ex…	scaffold_1	23756435	23763140	6706	+	scaffold_1	23760837	23761299	463	*	0.275487107319772	-0.0819449271677706	188.831678165328	0.379375	3.80886028022781	0.00129979298925	15.7981	-0.2498214	0.35946429	0.228994709	0.078629032	0.151428571	0.40125	NO	NO	NO	NO	NO	B	B	-3.16167814357054	-2.63242145320627	0.56686344936153	-0.88367777326992	-1.39033691413505	-0.899030269857964	0.610671371571852	-0.905058640239427	-0.52925669036427	1.45054122263145
AL1G53790	AT1G47550	OG0003213	SEC3A	protein_coding	exocyst complex component sec3A	exocyst complex component sec3A	exocyst complex component sec3A (SEC3A)%3B INVOLVED IN: biological_process unknown%3B LOCATED IN: plasma membrane%2C exocyst%3B EXPRESSED IN: male gametophyte%2C cultured cell%2C pollen tube%3B EXPRESSED DURING: L mature pollen stage%2C M germinated pollen stage%3B CONTAINS InterPro DOMAIN/s: Exocyst complex%2C component Exoc1 (InterPro:IPR019160)%3B BEST Arabidopsis thaliana protein match is: ex…	Encodes a member of the exocyst complex gene family. The exocyst is a protein complex involved in tethering vesicles to the plasma membrane during regulated or polarized secretion.	exocyst complex component sec3A (SEC3A)%3B INVOLVED IN: biological_process unknown%3B LOCATED IN: plasma membrane%2C exocyst%3B EXPRESSED IN: male gametophyte%2C cultured cell%2C pollen tube%3B EXPRESSED DURING: L mature pollen stage%2C M germinated pollen stage%3B CONTAINS InterPro DOMAIN/s: Exocyst complex%2C component Exoc1 (InterPro:IPR019160)%3B BEST Arabidopsis thaliana protein match is: ex…	scaffold_1	23756435	23763140	6706	+	scaffold_1	23760837	23761299	463	*	0.275487107319772	-0.0819449271677706	188.831678165328	0.379375	3.80886028022781	0.00129979298925	15.7981	-0.2498214	0.35946429	0.228994709	0.078629032	0.151428571	0.40125	NO	NO	NO	NO	NO	B	B	-3.16167814357054	-2.63242145320627	0.56686344936153	-0.88367777326992	-1.39033691413505	-0.899030269857964	0.610671371571852	-0.905058640239427	-0.52925669036427	1.45054122263145
AL1G53790	AT1G47550	OG0003213	SEC3A	protein_coding	exocyst complex component sec3A	exocyst complex component sec3A	exocyst complex component sec3A (SEC3A)%3B INVOLVED IN: biological_process unknown%3B LOCATED IN: plasma membrane%2C exocyst%3B EXPRESSED IN: male gametophyte%2C cultured cell%2C pollen tube%3B EXPRESSED DURING: L mature pollen stage%2C M germinated pollen stage%3B CONTAINS InterPro DOMAIN/s: Exocyst complex%2C component Exoc1 (InterPro:IPR019160)%3B BEST Arabidopsis thaliana protein match is: ex…	Encodes a member of the exocyst complex gene family. The exocyst is a protein complex involved in tethering vesicles to the plasma membrane during regulated or polarized secretion.	exocyst complex component sec3A (SEC3A)%3B INVOLVED IN: biological_process unknown%3B LOCATED IN: plasma membrane%2C exocyst%3B EXPRESSED IN: male gametophyte%2C cultured cell%2C pollen tube%3B EXPRESSED DURING: L mature pollen stage%2C M germinated pollen stage%3B CONTAINS InterPro DOMAIN/s: Exocyst complex%2C component Exoc1 (InterPro:IPR019160)%3B BEST Arabidopsis thaliana protein match is: ex…	scaffold_1	23756435	23763140	6706	+	scaffold_1	23757526	23757870	345	*	0.265339364181067	-0.0792610575974701	162.098647853587	0.331964285714286	4.1887898313922	3.47844308701E-4	5.2808	-0.3005357	0.33196429	0.214708995	0.030887097	0.195714286	0.49625	NO	NO	NO	NO	NO	B	B	-1.33467519209833	-3.43809826240438	0.403102897323753	-0.848996541979895	0.436666037337157	-1.70470707905607	0.446910819534075	-0.870377408949402	2.10342307030605	1.25209943930365
AL1G53790	AT1G47550	OG0003213	SEC3A	protein_coding	exocyst complex component sec3A	exocyst complex component sec3A	exocyst complex component sec3A (SEC3A)%3B INVOLVED IN: biological_process unknown%3B LOCATED IN: plasma membrane%2C exocyst%3B EXPRESSED IN: male gametophyte%2C cultured cell%2C pollen tube%3B EXPRESSED DURING: L mature pollen stage%2C M germinated pollen stage%3B CONTAINS InterPro DOMAIN/s: Exocyst complex%2C component Exoc1 (InterPro:IPR019160)%3B BEST Arabidopsis thaliana protein match is: ex…	Encodes a member of the exocyst complex gene family. The exocyst is a protein complex involved in tethering vesicles to the plasma membrane during regulated or polarized secretion.	exocyst complex component sec3A (SEC3A)%3B INVOLVED IN: biological_process unknown%3B LOCATED IN: plasma membrane%2C exocyst%3B EXPRESSED IN: male gametophyte%2C cultured cell%2C pollen tube%3B EXPRESSED DURING: L mature pollen stage%2C M germinated pollen stage%3B CONTAINS InterPro DOMAIN/s: Exocyst complex%2C component Exoc1 (InterPro:IPR019160)%3B BEST Arabidopsis thaliana protein match is: ex…	scaffold_1	23756435	23763140	6706	+	scaffold_1	23757526	23757870	345	*	0.265339364181067	-0.0792610575974701	162.098647853587	0.331964285714286	4.1887898313922	3.47844308701E-4	5.2808	-0.3005357	0.33196429	0.214708995	0.030887097	0.195714286	0.49625	NO	NO	NO	NO	NO	B	B	-1.33467519209833	-3.43809826240438	0.403102897323753	-0.848996541979895	0.436666037337157	-1.70470707905607	0.446910819534075	-0.870377408949402	2.10342307030605	1.25209943930365
AL1G53790	AT1G47550	OG0003213	SEC3A	protein_coding	exocyst complex component sec3A	exocyst complex component sec3A	exocyst complex component sec3A (SEC3A)%3B INVOLVED IN: biological_process unknown%3B LOCATED IN: plasma membrane%2C exocyst%3B EXPRESSED IN: male gametophyte%2C cultured cell%2C pollen tube%3B EXPRESSED DURING: L mature pollen stage%2C M germinated pollen stage%3B CONTAINS InterPro DOMAIN/s: Exocyst complex%2C component Exoc1 (InterPro:IPR019160)%3B BEST Arabidopsis thaliana protein match is: ex…	Encodes a member of the exocyst complex gene family. The exocyst is a protein complex involved in tethering vesicles to the plasma membrane during regulated or polarized secretion.	exocyst complex component sec3A (SEC3A)%3B INVOLVED IN: biological_process unknown%3B LOCATED IN: plasma membrane%2C exocyst%3B EXPRESSED IN: male gametophyte%2C cultured cell%2C pollen tube%3B EXPRESSED DURING: L mature pollen stage%2C M germinated pollen stage%3B CONTAINS InterPro DOMAIN/s: Exocyst complex%2C component Exoc1 (InterPro:IPR019160)%3B BEST Arabidopsis thaliana protein match is: ex…	scaffold_1	23756435	23763140	6706	+	scaffold_1	23760837	23761299	463	*	0.275487107319772	-0.0819449271677706	188.831678165328	0.379375	3.80886028022781	0.00129979298925	15.7981	-0.2498214	0.35946429	0.228994709	0.078629032	0.151428571	0.40125	NO	NO	NO	NO	NO	B	B	-3.16167814357054	-2.63242145320627	0.56686344936153	-0.88367777326992	-1.39033691413505	-0.899030269857964	0.610671371571852	-0.905058640239427	-0.52925669036427	1.45054122263145
AL1G53790	AT1G47550	OG0003213	SEC3A	protein_coding	exocyst complex component sec3A	exocyst complex component sec3A	exocyst complex component sec3A (SEC3A)%3B INVOLVED IN: biological_process unknown%3B LOCATED IN: plasma membrane%2C exocyst%3B EXPRESSED IN: male gametophyte%2C cultured cell%2C pollen tube%3B EXPRESSED DURING: L mature pollen stage%2C M germinated pollen stage%3B CONTAINS InterPro DOMAIN/s: Exocyst complex%2C component Exoc1 (InterPro:IPR019160)%3B BEST Arabidopsis thaliana protein match is: ex…	Encodes a member of the exocyst complex gene family. The exocyst is a protein complex involved in tethering vesicles to the plasma membrane during regulated or polarized secretion.	exocyst complex component sec3A (SEC3A)%3B INVOLVED IN: biological_process unknown%3B LOCATED IN: plasma membrane%2C exocyst%3B EXPRESSED IN: male gametophyte%2C cultured cell%2C pollen tube%3B EXPRESSED DURING: L mature pollen stage%2C M germinated pollen stage%3B CONTAINS InterPro DOMAIN/s: Exocyst complex%2C component Exoc1 (InterPro:IPR019160)%3B BEST Arabidopsis thaliana protein match is: ex…	scaffold_1	23756435	23763140	6706	+	scaffold_1	23760560	23760833	274	*	0.247527866795711	-0.0772359845776915	164.843355217802	0.320535714285714	3.51681352069552	0.00129979298925	13.3411	-0.2435714	0.31535714	0.206560847	0.030322581	0.131428571	0.375	NO	NO	NO	NO	NO	B	B	-0.303954500449189	-2.63242145320627	1.11798069179635	-0.88367777326992	1.4673867289863	-0.899030269857964	1.16178861400667	-0.905058640239427	2.32846695275708	2.00165846506627
AL1G53790	AT1G47550	OG0003213	SEC3A	protein_coding	exocyst complex component sec3A	exocyst complex component sec3A	exocyst complex component sec3A (SEC3A)%3B INVOLVED IN: biological_process unknown%3B LOCATED IN: plasma membrane%2C exocyst%3B EXPRESSED IN: male gametophyte%2C cultured cell%2C pollen tube%3B EXPRESSED DURING: L mature pollen stage%2C M germinated pollen stage%3B CONTAINS InterPro DOMAIN/s: Exocyst complex%2C component Exoc1 (InterPro:IPR019160)%3B BEST Arabidopsis thaliana protein match is: ex…	Encodes a member of the exocyst complex gene family. The exocyst is a protein complex involved in tethering vesicles to the plasma membrane during regulated or polarized secretion.	exocyst complex component sec3A (SEC3A)%3B INVOLVED IN: biological_process unknown%3B LOCATED IN: plasma membrane%2C exocyst%3B EXPRESSED IN: male gametophyte%2C cultured cell%2C pollen tube%3B EXPRESSED DURING: L mature pollen stage%2C M germinated pollen stage%3B CONTAINS InterPro DOMAIN/s: Exocyst complex%2C component Exoc1 (InterPro:IPR019160)%3B BEST Arabidopsis thaliana protein match is: ex…	scaffold_1	23756435	23763140	6706	+	scaffold_1	23760837	23761299	463	*	0.275487107319772	-0.0819449271677706	188.831678165328	0.379375	3.80886028022781	0.00129979298925	15.7981	-0.2498214	0.35946429	0.228994709	0.078629032	0.151428571	0.40125	NO	NO	NO	NO	NO	B	B	-3.16167814357054	-2.63242145320627	0.56686344936153	-0.88367777326992	-1.39033691413505	-0.899030269857964	0.610671371571852	-0.905058640239427	-0.52925669036427	1.45054122263145
AL1G53790	AT1G47550	OG0003213	SEC3A	protein_coding	exocyst complex component sec3A	exocyst complex component sec3A	exocyst complex component sec3A (SEC3A)%3B INVOLVED IN: biological_process unknown%3B LOCATED IN: plasma membrane%2C exocyst%3B EXPRESSED IN: male gametophyte%2C cultured cell%2C pollen tube%3B EXPRESSED DURING: L mature pollen stage%2C M germinated pollen stage%3B CONTAINS InterPro DOMAIN/s: Exocyst complex%2C component Exoc1 (InterPro:IPR019160)%3B BEST Arabidopsis thaliana protein match is: ex…	Encodes a member of the exocyst complex gene family. The exocyst is a protein complex involved in tethering vesicles to the plasma membrane during regulated or polarized secretion.	exocyst complex component sec3A (SEC3A)%3B INVOLVED IN: biological_process unknown%3B LOCATED IN: plasma membrane%2C exocyst%3B EXPRESSED IN: male gametophyte%2C cultured cell%2C pollen tube%3B EXPRESSED DURING: L mature pollen stage%2C M germinated pollen stage%3B CONTAINS InterPro DOMAIN/s: Exocyst complex%2C component Exoc1 (InterPro:IPR019160)%3B BEST Arabidopsis thaliana protein match is: ex…	scaffold_1	23756435	23763140	6706	+	scaffold_1	23757526	23757870	345	*	0.265339364181067	-0.0792610575974701	162.098647853587	0.331964285714286	4.1887898313922	3.47844308701E-4	5.2808	-0.3005357	0.33196429	0.214708995	0.030887097	0.195714286	0.49625	NO	NO	NO	NO	NO	B	B	-1.33467519209833	-3.43809826240438	0.403102897323753	-0.848996541979895	0.436666037337157	-1.70470707905607	0.446910819534075	-0.870377408949402	2.10342307030605	1.25209943930365
AL1G53790	AT1G47550	OG0003213	SEC3A	protein_coding	exocyst complex component sec3A	exocyst complex component sec3A	exocyst complex component sec3A (SEC3A)%3B INVOLVED IN: biological_process unknown%3B LOCATED IN: plasma membrane%2C exocyst%3B EXPRESSED IN: male gametophyte%2C cultured cell%2C pollen tube%3B EXPRESSED DURING: L mature pollen stage%2C M germinated pollen stage%3B CONTAINS InterPro DOMAIN/s: Exocyst complex%2C component Exoc1 (InterPro:IPR019160)%3B BEST Arabidopsis thaliana protein match is: ex…	Encodes a member of the exocyst complex gene family. The exocyst is a protein complex involved in tethering vesicles to the plasma membrane during regulated or polarized secretion.	exocyst complex component sec3A (SEC3A)%3B INVOLVED IN: biological_process unknown%3B LOCATED IN: plasma membrane%2C exocyst%3B EXPRESSED IN: male gametophyte%2C cultured cell%2C pollen tube%3B EXPRESSED DURING: L mature pollen stage%2C M germinated pollen stage%3B CONTAINS InterPro DOMAIN/s: Exocyst complex%2C component Exoc1 (InterPro:IPR019160)%3B BEST Arabidopsis thaliana protein match is: ex…	scaffold_1	23756435	23763140	6706	+	scaffold_1	23760837	23761299	463	*	0.275487107319772	-0.0819449271677706	188.831678165328	0.379375	3.80886028022781	0.00129979298925	15.7981	-0.2498214	0.35946429	0.228994709	0.078629032	0.151428571	0.40125	NO	NO	NO	NO	NO	B	B	-3.16167814357054	-2.63242145320627	0.56686344936153	-0.88367777326992	-1.39033691413505	-0.899030269857964	0.610671371571852	-0.905058640239427	-0.52925669036427	1.45054122263145
AL1G53790	AT1G47550	OG0003213	SEC3A	protein_coding	exocyst complex component sec3A	exocyst complex component sec3A	exocyst complex component sec3A (SEC3A)%3B INVOLVED IN: biological_process unknown%3B LOCATED IN: plasma membrane%2C exocyst%3B EXPRESSED IN: male gametophyte%2C cultured cell%2C pollen tube%3B EXPRESSED DURING: L mature pollen stage%2C M germinated pollen stage%3B CONTAINS InterPro DOMAIN/s: Exocyst complex%2C component Exoc1 (InterPro:IPR019160)%3B BEST Arabidopsis thaliana protein match is: ex…	Encodes a member of the exocyst complex gene family. The exocyst is a protein complex involved in tethering vesicles to the plasma membrane during regulated or polarized secretion.	exocyst complex component sec3A (SEC3A)%3B INVOLVED IN: biological_process unknown%3B LOCATED IN: plasma membrane%2C exocyst%3B EXPRESSED IN: male gametophyte%2C cultured cell%2C pollen tube%3B EXPRESSED DURING: L mature pollen stage%2C M germinated pollen stage%3B CONTAINS InterPro DOMAIN/s: Exocyst complex%2C component Exoc1 (InterPro:IPR019160)%3B BEST Arabidopsis thaliana protein match is: ex…	scaffold_1	23756435	23763140	6706	+	scaffold_1	23760837	23761299	463	*	0.275487107319772	-0.0819449271677706	188.831678165328	0.379375	3.80886028022781	0.00129979298925	15.7981	-0.2498214	0.35946429	0.228994709	0.078629032	0.151428571	0.40125	NO	NO	NO	NO	NO	B	B	-3.16167814357054	-2.63242145320627	0.56686344936153	-0.88367777326992	-1.39033691413505	-0.899030269857964	0.610671371571852	-0.905058640239427	-0.52925669036427	1.45054122263145
AL1G53790	AT1G47550	OG0003213	SEC3A	protein_coding	exocyst complex component sec3A	exocyst complex component sec3A	exocyst complex component sec3A (SEC3A)%3B INVOLVED IN: biological_process unknown%3B LOCATED IN: plasma membrane%2C exocyst%3B EXPRESSED IN: male gametophyte%2C cultured cell%2C pollen tube%3B EXPRESSED DURING: L mature pollen stage%2C M germinated pollen stage%3B CONTAINS InterPro DOMAIN/s: Exocyst complex%2C component Exoc1 (InterPro:IPR019160)%3B BEST Arabidopsis thaliana protein match is: ex…	Encodes a member of the exocyst complex gene family. The exocyst is a protein complex involved in tethering vesicles to the plasma membrane during regulated or polarized secretion.	exocyst complex component sec3A (SEC3A)%3B INVOLVED IN: biological_process unknown%3B LOCATED IN: plasma membrane%2C exocyst%3B EXPRESSED IN: male gametophyte%2C cultured cell%2C pollen tube%3B EXPRESSED DURING: L mature pollen stage%2C M germinated pollen stage%3B CONTAINS InterPro DOMAIN/s: Exocyst complex%2C component Exoc1 (InterPro:IPR019160)%3B BEST Arabidopsis thaliana protein match is: ex…	scaffold_1	23756435	23763140	6706	+	scaffold_1	23760560	23760833	274	*	0.247527866795711	-0.0772359845776915	164.843355217802	0.320535714285714	3.51681352069552	0.00129979298925	13.3411	-0.2435714	0.31535714	0.206560847	0.030322581	0.131428571	0.375	NO	NO	NO	NO	NO	B	B	-0.303954500449189	-2.63242145320627	1.11798069179635	-0.88367777326992	1.4673867289863	-0.899030269857964	1.16178861400667	-0.905058640239427	2.32846695275708	2.00165846506627
AL1G53790	AT1G47550	OG0003213	SEC3A	protein_coding	exocyst complex component sec3A	exocyst complex component sec3A	exocyst complex component sec3A (SEC3A)%3B INVOLVED IN: biological_process unknown%3B LOCATED IN: plasma membrane%2C exocyst%3B EXPRESSED IN: male gametophyte%2C cultured cell%2C pollen tube%3B EXPRESSED DURING: L mature pollen stage%2C M germinated pollen stage%3B CONTAINS InterPro DOMAIN/s: Exocyst complex%2C component Exoc1 (InterPro:IPR019160)%3B BEST Arabidopsis thaliana protein match is: ex…	Encodes a member of the exocyst complex gene family. The exocyst is a protein complex involved in tethering vesicles to the plasma membrane during regulated or polarized secretion.	exocyst complex component sec3A (SEC3A)%3B INVOLVED IN: biological_process unknown%3B LOCATED IN: plasma membrane%2C exocyst%3B EXPRESSED IN: male gametophyte%2C cultured cell%2C pollen tube%3B EXPRESSED DURING: L mature pollen stage%2C M germinated pollen stage%3B CONTAINS InterPro DOMAIN/s: Exocyst complex%2C component Exoc1 (InterPro:IPR019160)%3B BEST Arabidopsis thaliana protein match is: ex…	scaffold_1	23756435	23763140	6706	+	scaffold_1	23757526	23757870	345	*	0.265339364181067	-0.0792610575974701	162.098647853587	0.331964285714286	4.1887898313922	3.47844308701E-4	5.2808	-0.3005357	0.33196429	0.214708995	0.030887097	0.195714286	0.49625	NO	NO	NO	NO	NO	B	B	-1.33467519209833	-3.43809826240438	0.403102897323753	-0.848996541979895	0.436666037337157	-1.70470707905607	0.446910819534075	-0.870377408949402	2.10342307030605	1.25209943930365
AL1G53790	AT1G47560	OG0003213	SEC3B	protein_coding	exocyst complex component sec3B	exocyst complex component sec3B	exocyst complex component sec3B (SEC3B)%3B CONTAINS InterPro DOMAIN/s: Exocyst complex%2C component Exoc1 (InterPro:IPR019160)%3B BEST Arabidopsis thaliana protein match is: exocyst complex component sec3A (TAIR:AT1G47550.1)%3B Has 437 Blast hits to 422 proteins in 153 species: Archae - 2%3B Bacteria - 6%3B Metazoa - 176%3B Fungi - 108%3B Plants - 103%3B Viruses - 0%3B Other Eukaryotes - 42 (sour…	Encodes a member of the exocyst complex gene family. The exocyst is a protein complex involved in tethering vesicles to the plasma membrane during regulated or polarized secretion.	exocyst complex component sec3B (SEC3B)%3B CONTAINS InterPro DOMAIN/s: Exocyst complex%2C component Exoc1 (InterPro:IPR019160)%3B BEST Arabidopsis thaliana protein match is: exocyst complex component sec3A (TAIR:AT1G47550.1)%3B Has 437 Blast hits to 422 proteins in 153 species: Archae - 2%3B Bacteria - 6%3B Metazoa - 176%3B Fungi - 108%3B Plants - 103%3B Viruses - 0%3B Other Eukaryotes - 42 (sour…	scaffold_1	23756435	23763140	6706	+	scaffold_1	23760837	23761299	463	*	0.275487107319772	-0.0819449271677706	188.831678165328	0.379375	3.80886028022781	0.00129979298925	15.7981	-0.2498214	0.35946429	0.228994709	0.078629032	0.151428571	0.40125	NO	NO	NO	NO	NO	B	B	-3.16167814357054	-2.63242145320627	0.56686344936153	-0.88367777326992	-1.39033691413505	-0.899030269857964	0.610671371571852	-0.905058640239427	-0.52925669036427	1.45054122263145
AL1G53790	AT1G47560	OG0003213	SEC3B	protein_coding	exocyst complex component sec3B	exocyst complex component sec3B	exocyst complex component sec3B (SEC3B)%3B CONTAINS InterPro DOMAIN/s: Exocyst complex%2C component Exoc1 (InterPro:IPR019160)%3B BEST Arabidopsis thaliana protein match is: exocyst complex component sec3A (TAIR:AT1G47550.1)%3B Has 437 Blast hits to 422 proteins in 153 species: Archae - 2%3B Bacteria - 6%3B Metazoa - 176%3B Fungi - 108%3B Plants - 103%3B Viruses - 0%3B Other Eukaryotes - 42 (sour…	Encodes a member of the exocyst complex gene family. The exocyst is a protein complex involved in tethering vesicles to the plasma membrane during regulated or polarized secretion.	exocyst complex component sec3B (SEC3B)%3B CONTAINS InterPro DOMAIN/s: Exocyst complex%2C component Exoc1 (InterPro:IPR019160)%3B BEST Arabidopsis thaliana protein match is: exocyst complex component sec3A (TAIR:AT1G47550.1)%3B Has 437 Blast hits to 422 proteins in 153 species: Archae - 2%3B Bacteria - 6%3B Metazoa - 176%3B Fungi - 108%3B Plants - 103%3B Viruses - 0%3B Other Eukaryotes - 42 (sour…	scaffold_1	23756435	23763140	6706	+	scaffold_1	23760837	23761299	463	*	0.275487107319772	-0.0819449271677706	188.831678165328	0.379375	3.80886028022781	0.00129979298925	15.7981	-0.2498214	0.35946429	0.228994709	0.078629032	0.151428571	0.40125	NO	NO	NO	NO	NO	B	B	-3.16167814357054	-2.63242145320627	0.56686344936153	-0.88367777326992	-1.39033691413505	-0.899030269857964	0.610671371571852	-0.905058640239427	-0.52925669036427	1.45054122263145
AL1G53790	AT1G47560	OG0003213	SEC3B	protein_coding	exocyst complex component sec3B	exocyst complex component sec3B	exocyst complex component sec3B (SEC3B)%3B CONTAINS InterPro DOMAIN/s: Exocyst complex%2C component Exoc1 (InterPro:IPR019160)%3B BEST Arabidopsis thaliana protein match is: exocyst complex component sec3A (TAIR:AT1G47550.1)%3B Has 437 Blast hits to 422 proteins in 153 species: Archae - 2%3B Bacteria - 6%3B Metazoa - 176%3B Fungi - 108%3B Plants - 103%3B Viruses - 0%3B Other Eukaryotes - 42 (sour…	Encodes a member of the exocyst complex gene family. The exocyst is a protein complex involved in tethering vesicles to the plasma membrane during regulated or polarized secretion.	exocyst complex component sec3B (SEC3B)%3B CONTAINS InterPro DOMAIN/s: Exocyst complex%2C component Exoc1 (InterPro:IPR019160)%3B BEST Arabidopsis thaliana protein match is: exocyst complex component sec3A (TAIR:AT1G47550.1)%3B Has 437 Blast hits to 422 proteins in 153 species: Archae - 2%3B Bacteria - 6%3B Metazoa - 176%3B Fungi - 108%3B Plants - 103%3B Viruses - 0%3B Other Eukaryotes - 42 (sour…	scaffold_1	23756435	23763140	6706	+	scaffold_1	23757526	23757870	345	*	0.265339364181067	-0.0792610575974701	162.098647853587	0.331964285714286	4.1887898313922	3.47844308701E-4	5.2808	-0.3005357	0.33196429	0.214708995	0.030887097	0.195714286	0.49625	NO	NO	NO	NO	NO	B	B	-1.33467519209833	-3.43809826240438	0.403102897323753	-0.848996541979895	0.436666037337157	-1.70470707905607	0.446910819534075	-0.870377408949402	2.10342307030605	1.25209943930365
AL1G53790	AT1G47560	OG0003213	SEC3B	protein_coding	exocyst complex component sec3B	exocyst complex component sec3B	exocyst complex component sec3B (SEC3B)%3B CONTAINS InterPro DOMAIN/s: Exocyst complex%2C component Exoc1 (InterPro:IPR019160)%3B BEST Arabidopsis thaliana protein match is: exocyst complex component sec3A (TAIR:AT1G47550.1)%3B Has 437 Blast hits to 422 proteins in 153 species: Archae - 2%3B Bacteria - 6%3B Metazoa - 176%3B Fungi - 108%3B Plants - 103%3B Viruses - 0%3B Other Eukaryotes - 42 (sour…	Encodes a member of the exocyst complex gene family. The exocyst is a protein complex involved in tethering vesicles to the plasma membrane during regulated or polarized secretion.	exocyst complex component sec3B (SEC3B)%3B CONTAINS InterPro DOMAIN/s: Exocyst complex%2C component Exoc1 (InterPro:IPR019160)%3B BEST Arabidopsis thaliana protein match is: exocyst complex component sec3A (TAIR:AT1G47550.1)%3B Has 437 Blast hits to 422 proteins in 153 species: Archae - 2%3B Bacteria - 6%3B Metazoa - 176%3B Fungi - 108%3B Plants - 103%3B Viruses - 0%3B Other Eukaryotes - 42 (sour…	scaffold_1	23756435	23763140	6706	+	scaffold_1	23757526	23757870	345	*	0.265339364181067	-0.0792610575974701	162.098647853587	0.331964285714286	4.1887898313922	3.47844308701E-4	5.2808	-0.3005357	0.33196429	0.214708995	0.030887097	0.195714286	0.49625	NO	NO	NO	NO	NO	B	B	-1.33467519209833	-3.43809826240438	0.403102897323753	-0.848996541979895	0.436666037337157	-1.70470707905607	0.446910819534075	-0.870377408949402	2.10342307030605	1.25209943930365
AL1G53790	AT1G47560	OG0003213	SEC3B	protein_coding	exocyst complex component sec3B	exocyst complex component sec3B	exocyst complex component sec3B (SEC3B)%3B CONTAINS InterPro DOMAIN/s: Exocyst complex%2C component Exoc1 (InterPro:IPR019160)%3B BEST Arabidopsis thaliana protein match is: exocyst complex component sec3A (TAIR:AT1G47550.1)%3B Has 437 Blast hits to 422 proteins in 153 species: Archae - 2%3B Bacteria - 6%3B Metazoa - 176%3B Fungi - 108%3B Plants - 103%3B Viruses - 0%3B Other Eukaryotes - 42 (sour…	Encodes a member of the exocyst complex gene family. The exocyst is a protein complex involved in tethering vesicles to the plasma membrane during regulated or polarized secretion.	exocyst complex component sec3B (SEC3B)%3B CONTAINS InterPro DOMAIN/s: Exocyst complex%2C component Exoc1 (InterPro:IPR019160)%3B BEST Arabidopsis thaliana protein match is: exocyst complex component sec3A (TAIR:AT1G47550.1)%3B Has 437 Blast hits to 422 proteins in 153 species: Archae - 2%3B Bacteria - 6%3B Metazoa - 176%3B Fungi - 108%3B Plants - 103%3B Viruses - 0%3B Other Eukaryotes - 42 (sour…	scaffold_1	23756435	23763140	6706	+	scaffold_1	23760837	23761299	463	*	0.275487107319772	-0.0819449271677706	188.831678165328	0.379375	3.80886028022781	0.00129979298925	15.7981	-0.2498214	0.35946429	0.228994709	0.078629032	0.151428571	0.40125	NO	NO	NO	NO	NO	B	B	-3.16167814357054	-2.63242145320627	0.56686344936153	-0.88367777326992	-1.39033691413505	-0.899030269857964	0.610671371571852	-0.905058640239427	-0.52925669036427	1.45054122263145
AL1G53790	AT1G47560	OG0003213	SEC3B	protein_coding	exocyst complex component sec3B	exocyst complex component sec3B	exocyst complex component sec3B (SEC3B)%3B CONTAINS InterPro DOMAIN/s: Exocyst complex%2C component Exoc1 (InterPro:IPR019160)%3B BEST Arabidopsis thaliana protein match is: exocyst complex component sec3A (TAIR:AT1G47550.1)%3B Has 437 Blast hits to 422 proteins in 153 species: Archae - 2%3B Bacteria - 6%3B Metazoa - 176%3B Fungi - 108%3B Plants - 103%3B Viruses - 0%3B Other Eukaryotes - 42 (sour…	Encodes a member of the exocyst complex gene family. The exocyst is a protein complex involved in tethering vesicles to the plasma membrane during regulated or polarized secretion.	exocyst complex component sec3B (SEC3B)%3B CONTAINS InterPro DOMAIN/s: Exocyst complex%2C component Exoc1 (InterPro:IPR019160)%3B BEST Arabidopsis thaliana protein match is: exocyst complex component sec3A (TAIR:AT1G47550.1)%3B Has 437 Blast hits to 422 proteins in 153 species: Archae - 2%3B Bacteria - 6%3B Metazoa - 176%3B Fungi - 108%3B Plants - 103%3B Viruses - 0%3B Other Eukaryotes - 42 (sour…	scaffold_1	23756435	23763140	6706	+	scaffold_1	23760560	23760833	274	*	0.247527866795711	-0.0772359845776915	164.843355217802	0.320535714285714	3.51681352069552	0.00129979298925	13.3411	-0.2435714	0.31535714	0.206560847	0.030322581	0.131428571	0.375	NO	NO	NO	NO	NO	B	B	-0.303954500449189	-2.63242145320627	1.11798069179635	-0.88367777326992	1.4673867289863	-0.899030269857964	1.16178861400667	-0.905058640239427	2.32846695275708	2.00165846506627
AL1G53790	AT1G47560	OG0003213	SEC3B	protein_coding	exocyst complex component sec3B	exocyst complex component sec3B	exocyst complex component sec3B (SEC3B)%3B CONTAINS InterPro DOMAIN/s: Exocyst complex%2C component Exoc1 (InterPro:IPR019160)%3B BEST Arabidopsis thaliana protein match is: exocyst complex component sec3A (TAIR:AT1G47550.1)%3B Has 437 Blast hits to 422 proteins in 153 species: Archae - 2%3B Bacteria - 6%3B Metazoa - 176%3B Fungi - 108%3B Plants - 103%3B Viruses - 0%3B Other Eukaryotes - 42 (sour…	Encodes a member of the exocyst complex gene family. The exocyst is a protein complex involved in tethering vesicles to the plasma membrane during regulated or polarized secretion.	exocyst complex component sec3B (SEC3B)%3B CONTAINS InterPro DOMAIN/s: Exocyst complex%2C component Exoc1 (InterPro:IPR019160)%3B BEST Arabidopsis thaliana protein match is: exocyst complex component sec3A (TAIR:AT1G47550.1)%3B Has 437 Blast hits to 422 proteins in 153 species: Archae - 2%3B Bacteria - 6%3B Metazoa - 176%3B Fungi - 108%3B Plants - 103%3B Viruses - 0%3B Other Eukaryotes - 42 (sour…	scaffold_1	23756435	23763140	6706	+	scaffold_1	23760837	23761299	463	*	0.275487107319772	-0.0819449271677706	188.831678165328	0.379375	3.80886028022781	0.00129979298925	15.7981	-0.2498214	0.35946429	0.228994709	0.078629032	0.151428571	0.40125	NO	NO	NO	NO	NO	B	B	-3.16167814357054	-2.63242145320627	0.56686344936153	-0.88367777326992	-1.39033691413505	-0.899030269857964	0.610671371571852	-0.905058640239427	-0.52925669036427	1.45054122263145
AL1G53790	AT1G47560	OG0003213	SEC3B	protein_coding	exocyst complex component sec3B	exocyst complex component sec3B	exocyst complex component sec3B (SEC3B)%3B CONTAINS InterPro DOMAIN/s: Exocyst complex%2C component Exoc1 (InterPro:IPR019160)%3B BEST Arabidopsis thaliana protein match is: exocyst complex component sec3A (TAIR:AT1G47550.1)%3B Has 437 Blast hits to 422 proteins in 153 species: Archae - 2%3B Bacteria - 6%3B Metazoa - 176%3B Fungi - 108%3B Plants - 103%3B Viruses - 0%3B Other Eukaryotes - 42 (sour…	Encodes a member of the exocyst complex gene family. The exocyst is a protein complex involved in tethering vesicles to the plasma membrane during regulated or polarized secretion.	exocyst complex component sec3B (SEC3B)%3B CONTAINS InterPro DOMAIN/s: Exocyst complex%2C component Exoc1 (InterPro:IPR019160)%3B BEST Arabidopsis thaliana protein match is: exocyst complex component sec3A (TAIR:AT1G47550.1)%3B Has 437 Blast hits to 422 proteins in 153 species: Archae - 2%3B Bacteria - 6%3B Metazoa - 176%3B Fungi - 108%3B Plants - 103%3B Viruses - 0%3B Other Eukaryotes - 42 (sour…	scaffold_1	23756435	23763140	6706	+	scaffold_1	23757526	23757870	345	*	0.265339364181067	-0.0792610575974701	162.098647853587	0.331964285714286	4.1887898313922	3.47844308701E-4	5.2808	-0.3005357	0.33196429	0.214708995	0.030887097	0.195714286	0.49625	NO	NO	NO	NO	NO	B	B	-1.33467519209833	-3.43809826240438	0.403102897323753	-0.848996541979895	0.436666037337157	-1.70470707905607	0.446910819534075	-0.870377408949402	2.10342307030605	1.25209943930365
AL1G53790	AT1G47560	OG0003213	SEC3B	protein_coding	exocyst complex component sec3B	exocyst complex component sec3B	exocyst complex component sec3B (SEC3B)%3B CONTAINS InterPro DOMAIN/s: Exocyst complex%2C component Exoc1 (InterPro:IPR019160)%3B BEST Arabidopsis thaliana protein match is: exocyst complex component sec3A (TAIR:AT1G47550.1)%3B Has 437 Blast hits to 422 proteins in 153 species: Archae - 2%3B Bacteria - 6%3B Metazoa - 176%3B Fungi - 108%3B Plants - 103%3B Viruses - 0%3B Other Eukaryotes - 42 (sour…	Encodes a member of the exocyst complex gene family. The exocyst is a protein complex involved in tethering vesicles to the plasma membrane during regulated or polarized secretion.	exocyst complex component sec3B (SEC3B)%3B CONTAINS InterPro DOMAIN/s: Exocyst complex%2C component Exoc1 (InterPro:IPR019160)%3B BEST Arabidopsis thaliana protein match is: exocyst complex component sec3A (TAIR:AT1G47550.1)%3B Has 437 Blast hits to 422 proteins in 153 species: Archae - 2%3B Bacteria - 6%3B Metazoa - 176%3B Fungi - 108%3B Plants - 103%3B Viruses - 0%3B Other Eukaryotes - 42 (sour…	scaffold_1	23756435	23763140	6706	+	scaffold_1	23760837	23761299	463	*	0.275487107319772	-0.0819449271677706	188.831678165328	0.379375	3.80886028022781	0.00129979298925	15.7981	-0.2498214	0.35946429	0.228994709	0.078629032	0.151428571	0.40125	NO	NO	NO	NO	NO	B	B	-3.16167814357054	-2.63242145320627	0.56686344936153	-0.88367777326992	-1.39033691413505	-0.899030269857964	0.610671371571852	-0.905058640239427	-0.52925669036427	1.45054122263145
AL1G53790	AT1G47560	OG0003213	SEC3B	protein_coding	exocyst complex component sec3B	exocyst complex component sec3B	exocyst complex component sec3B (SEC3B)%3B CONTAINS InterPro DOMAIN/s: Exocyst complex%2C component Exoc1 (InterPro:IPR019160)%3B BEST Arabidopsis thaliana protein match is: exocyst complex component sec3A (TAIR:AT1G47550.1)%3B Has 437 Blast hits to 422 proteins in 153 species: Archae - 2%3B Bacteria - 6%3B Metazoa - 176%3B Fungi - 108%3B Plants - 103%3B Viruses - 0%3B Other Eukaryotes - 42 (sour…	Encodes a member of the exocyst complex gene family. The exocyst is a protein complex involved in tethering vesicles to the plasma membrane during regulated or polarized secretion.	exocyst complex component sec3B (SEC3B)%3B CONTAINS InterPro DOMAIN/s: Exocyst complex%2C component Exoc1 (InterPro:IPR019160)%3B BEST Arabidopsis thaliana protein match is: exocyst complex component sec3A (TAIR:AT1G47550.1)%3B Has 437 Blast hits to 422 proteins in 153 species: Archae - 2%3B Bacteria - 6%3B Metazoa - 176%3B Fungi - 108%3B Plants - 103%3B Viruses - 0%3B Other Eukaryotes - 42 (sour…	scaffold_1	23756435	23763140	6706	+	scaffold_1	23760837	23761299	463	*	0.275487107319772	-0.0819449271677706	188.831678165328	0.379375	3.80886028022781	0.00129979298925	15.7981	-0.2498214	0.35946429	0.228994709	0.078629032	0.151428571	0.40125	NO	NO	NO	NO	NO	B	B	-3.16167814357054	-2.63242145320627	0.56686344936153	-0.88367777326992	-1.39033691413505	-0.899030269857964	0.610671371571852	-0.905058640239427	-0.52925669036427	1.45054122263145
AL1G53790	AT1G47560	OG0003213	SEC3B	protein_coding	exocyst complex component sec3B	exocyst complex component sec3B	exocyst complex component sec3B (SEC3B)%3B CONTAINS InterPro DOMAIN/s: Exocyst complex%2C component Exoc1 (InterPro:IPR019160)%3B BEST Arabidopsis thaliana protein match is: exocyst complex component sec3A (TAIR:AT1G47550.1)%3B Has 437 Blast hits to 422 proteins in 153 species: Archae - 2%3B Bacteria - 6%3B Metazoa - 176%3B Fungi - 108%3B Plants - 103%3B Viruses - 0%3B Other Eukaryotes - 42 (sour…	Encodes a member of the exocyst complex gene family. The exocyst is a protein complex involved in tethering vesicles to the plasma membrane during regulated or polarized secretion.	exocyst complex component sec3B (SEC3B)%3B CONTAINS InterPro DOMAIN/s: Exocyst complex%2C component Exoc1 (InterPro:IPR019160)%3B BEST Arabidopsis thaliana protein match is: exocyst complex component sec3A (TAIR:AT1G47550.1)%3B Has 437 Blast hits to 422 proteins in 153 species: Archae - 2%3B Bacteria - 6%3B Metazoa - 176%3B Fungi - 108%3B Plants - 103%3B Viruses - 0%3B Other Eukaryotes - 42 (sour…	scaffold_1	23756435	23763140	6706	+	scaffold_1	23760560	23760833	274	*	0.247527866795711	-0.0772359845776915	164.843355217802	0.320535714285714	3.51681352069552	0.00129979298925	13.3411	-0.2435714	0.31535714	0.206560847	0.030322581	0.131428571	0.375	NO	NO	NO	NO	NO	B	B	-0.303954500449189	-2.63242145320627	1.11798069179635	-0.88367777326992	1.4673867289863	-0.899030269857964	1.16178861400667	-0.905058640239427	2.32846695275708	2.00165846506627
AL1G53790	AT1G47560	OG0003213	SEC3B	protein_coding	exocyst complex component sec3B	exocyst complex component sec3B	exocyst complex component sec3B (SEC3B)%3B CONTAINS InterPro DOMAIN/s: Exocyst complex%2C component Exoc1 (InterPro:IPR019160)%3B BEST Arabidopsis thaliana protein match is: exocyst complex component sec3A (TAIR:AT1G47550.1)%3B Has 437 Blast hits to 422 proteins in 153 species: Archae - 2%3B Bacteria - 6%3B Metazoa - 176%3B Fungi - 108%3B Plants - 103%3B Viruses - 0%3B Other Eukaryotes - 42 (sour…	Encodes a member of the exocyst complex gene family. The exocyst is a protein complex involved in tethering vesicles to the plasma membrane during regulated or polarized secretion.	exocyst complex component sec3B (SEC3B)%3B CONTAINS InterPro DOMAIN/s: Exocyst complex%2C component Exoc1 (InterPro:IPR019160)%3B BEST Arabidopsis thaliana protein match is: exocyst complex component sec3A (TAIR:AT1G47550.1)%3B Has 437 Blast hits to 422 proteins in 153 species: Archae - 2%3B Bacteria - 6%3B Metazoa - 176%3B Fungi - 108%3B Plants - 103%3B Viruses - 0%3B Other Eukaryotes - 42 (sour…	scaffold_1	23756435	23763140	6706	+	scaffold_1	23757526	23757870	345	*	0.265339364181067	-0.0792610575974701	162.098647853587	0.331964285714286	4.1887898313922	3.47844308701E-4	5.2808	-0.3005357	0.33196429	0.214708995	0.030887097	0.195714286	0.49625	NO	NO	NO	NO	NO	B	B	-1.33467519209833	-3.43809826240438	0.403102897323753	-0.848996541979895	0.436666037337157	-1.70470707905607	0.446910819534075	-0.870377408949402	2.10342307030605	1.25209943930365
AL1G53990	AT1G47620	OG0002246	CYP96A8	protein_coding	cytochrome P450%2C family 96%2C subfamily A%2C polypeptide 8	cytochrome P450%2C family 96%2C subfamily A%2C polypeptide 8	cytochrome P450%2C family 96%2C subfamily A%2C polypeptide 8 (CYP96A8)%3B FUNCTIONS IN: electron carrier activity%2C monooxygenase activity%2C iron ion binding%2C oxygen binding%2C heme binding%3B LOCATED IN: endomembrane system%3B EXPRESSED IN: synergid%3B CONTAINS InterPro DOMAIN/s: Cytochrome P450 (InterPro:IPR001128)%2C Cytochrome P450%2C E-class%2C group IV (InterPro:IPR002403)%2C Cytochrome…	member of CYP96A	cytochrome P450%2C family 96%2C subfamily A%2C polypeptide 8 (CYP96A8)%3B FUNCTIONS IN: electron carrier activity%2C monooxygenase activity%2C iron ion binding%2C oxygen binding%2C heme binding%3B LOCATED IN: endomembrane system%3B EXPRESSED IN: synergid%3B CONTAINS InterPro DOMAIN/s: Cytochrome P450 (InterPro:IPR001128)%2C Cytochrome P450%2C E-class%2C group IV (InterPro:IPR002403)%2C Cytochrome…	scaffold_1	23915394	23917284	1891	-	scaffold_1	23916441	23916955	515	*	0.29606389935997	-0.197247177956779	236.563595965071	0.425	4.73156623539379	8.16267764555E-4	13.535	-0.1141071	0.39875	0.117354497	0.173306452	0.187142857	0.30125	NO	MODERATE	NO	0	0.03125	B	B	-2.96159706813276	-2.11136691865945	-0.754243311789366	-0.803217316677058	-1.19025583869727	-0.377975735311144	-0.710435389579044	-0.824598183646565	-0.85023014947331	0.048974004887692
AL1G53990	AT1G47620	OG0002246	CYP96A8	protein_coding	cytochrome P450%2C family 96%2C subfamily A%2C polypeptide 8	cytochrome P450%2C family 96%2C subfamily A%2C polypeptide 8	cytochrome P450%2C family 96%2C subfamily A%2C polypeptide 8 (CYP96A8)%3B FUNCTIONS IN: electron carrier activity%2C monooxygenase activity%2C iron ion binding%2C oxygen binding%2C heme binding%3B LOCATED IN: endomembrane system%3B EXPRESSED IN: synergid%3B CONTAINS InterPro DOMAIN/s: Cytochrome P450 (InterPro:IPR001128)%2C Cytochrome P450%2C E-class%2C group IV (InterPro:IPR002403)%2C Cytochrome…	member of CYP96A	cytochrome P450%2C family 96%2C subfamily A%2C polypeptide 8 (CYP96A8)%3B FUNCTIONS IN: electron carrier activity%2C monooxygenase activity%2C iron ion binding%2C oxygen binding%2C heme binding%3B LOCATED IN: endomembrane system%3B EXPRESSED IN: synergid%3B CONTAINS InterPro DOMAIN/s: Cytochrome P450 (InterPro:IPR001128)%2C Cytochrome P450%2C E-class%2C group IV (InterPro:IPR002403)%2C Cytochrome…	scaffold_1	23915394	23917284	1891	-	scaffold_1	23916441	23916955	515	*	0.29606389935997	-0.197247177956779	236.563595965071	0.425	4.73156623539379	8.16267764555E-4	13.535	-0.1141071	0.39875	0.117354497	0.173306452	0.187142857	0.30125	NO	NO	NO	0	0.03125	B	B	-2.96159706813276	-2.11136691865945	-0.754243311789366	-0.803217316677058	-1.19025583869727	-0.377975735311144	-0.710435389579044	-0.824598183646565	-0.85023014947331	0.048974004887692
AL1G53990	AT1G47620	OG0002246	CYP96A8	protein_coding	cytochrome P450%2C family 96%2C subfamily A%2C polypeptide 8	cytochrome P450%2C family 96%2C subfamily A%2C polypeptide 8	cytochrome P450%2C family 96%2C subfamily A%2C polypeptide 8 (CYP96A8)%3B FUNCTIONS IN: electron carrier activity%2C monooxygenase activity%2C iron ion binding%2C oxygen binding%2C heme binding%3B LOCATED IN: endomembrane system%3B EXPRESSED IN: synergid%3B CONTAINS InterPro DOMAIN/s: Cytochrome P450 (InterPro:IPR001128)%2C Cytochrome P450%2C E-class%2C group IV (InterPro:IPR002403)%2C Cytochrome…	member of CYP96A	cytochrome P450%2C family 96%2C subfamily A%2C polypeptide 8 (CYP96A8)%3B FUNCTIONS IN: electron carrier activity%2C monooxygenase activity%2C iron ion binding%2C oxygen binding%2C heme binding%3B LOCATED IN: endomembrane system%3B EXPRESSED IN: synergid%3B CONTAINS InterPro DOMAIN/s: Cytochrome P450 (InterPro:IPR001128)%2C Cytochrome P450%2C E-class%2C group IV (InterPro:IPR002403)%2C Cytochrome…	scaffold_1	23915394	23917284	1891	-	scaffold_1	23916441	23916955	515	*	0.29606389935997	-0.197247177956779	236.563595965071	0.425	4.73156623539379	8.16267764555E-4	13.535	-0.1141071	0.39875	0.117354497	0.173306452	0.187142857	0.30125	NO	NO	NO	0	0.03125	B	B	-2.96159706813276	-2.11136691865945	-0.754243311789366	-0.803217316677058	-1.19025583869727	-0.377975735311144	-0.710435389579044	-0.824598183646565	-0.85023014947331	0.048974004887692
AL1G53990	AT1G47620	OG0002246	CYP96A8	protein_coding	cytochrome P450%2C family 96%2C subfamily A%2C polypeptide 8	cytochrome P450%2C family 96%2C subfamily A%2C polypeptide 8	cytochrome P450%2C family 96%2C subfamily A%2C polypeptide 8 (CYP96A8)%3B FUNCTIONS IN: electron carrier activity%2C monooxygenase activity%2C iron ion binding%2C oxygen binding%2C heme binding%3B LOCATED IN: endomembrane system%3B EXPRESSED IN: synergid%3B CONTAINS InterPro DOMAIN/s: Cytochrome P450 (InterPro:IPR001128)%2C Cytochrome P450%2C E-class%2C group IV (InterPro:IPR002403)%2C Cytochrome…	member of CYP96A	cytochrome P450%2C family 96%2C subfamily A%2C polypeptide 8 (CYP96A8)%3B FUNCTIONS IN: electron carrier activity%2C monooxygenase activity%2C iron ion binding%2C oxygen binding%2C heme binding%3B LOCATED IN: endomembrane system%3B EXPRESSED IN: synergid%3B CONTAINS InterPro DOMAIN/s: Cytochrome P450 (InterPro:IPR001128)%2C Cytochrome P450%2C E-class%2C group IV (InterPro:IPR002403)%2C Cytochrome…	scaffold_1	23915394	23917284	1891	-	scaffold_1	23916441	23916955	515	*	0.29606389935997	-0.197247177956779	236.563595965071	0.425	4.73156623539379	8.16267764555E-4	13.535	-0.1141071	0.39875	0.117354497	0.173306452	0.187142857	0.30125	NO	NO	NO	0	0.03125	B	B	-2.96159706813276	-2.11136691865945	-0.754243311789366	-0.803217316677058	-1.19025583869727	-0.377975735311144	-0.710435389579044	-0.824598183646565	-0.85023014947331	0.048974004887692
AL1G54650	AT1G48090	OG0013842	.	protein_coding	calcium-dependent lipid-binding family protein	.	calcium-dependent lipid-binding family protein%3B FUNCTIONS IN: phosphoinositide binding%3B INVOLVED IN: signal transduction%3B LOCATED IN: chloroplast%3B EXPRESSED IN: 26 plant structures%3B EXPRESSED DURING: 15 growth stages%3B CONTAINS InterPro DOMAIN/s: C2 membrane targeting protein (InterPro:IPR018029)%2C Protein of unknown function DUF946 (InterPro:IPR009291)%2C Vacuolar protein sorting-ass…	.	calcium-dependent lipid-binding family protein%3B FUNCTIONS IN: phosphoinositide binding%3B INVOLVED IN: signal transduction%3B LOCATED IN: chloroplast%3B EXPRESSED IN: 26 plant structures%3B EXPRESSED DURING: 15 growth stages%3B CONTAINS InterPro DOMAIN/s: C2 membrane targeting protein (InterPro:IPR018029)%2C Protein of unknown function DUF946 (InterPro:IPR009291)%2C Vacuolar protein sorting-ass…	scaffold_1	24376064	24402548	26485	-	scaffold_1	24393992	24394258	267	*	0.237795835830657	-0.172681338504631	243.71768183101	0.442946428571429	4.12037020527934	0.00129979298925	15.7952	-0.2601786	0.39375	0.143280423	0.30733871	0.188571429	0.44875	NO	NO	NO	0.0357142857142857	0.125	B	B	-0.279702248880979	0.308675384857119	0.784161104950113	-4.14510076378418	1.49163898055451	2.04206656820543	0.827969027160435	-4.16648163075369	-0.588377633738098	4.92926186873429
AL1G54650	AT1G48090	OG0013842	.	protein_coding	calcium-dependent lipid-binding family protein	.	calcium-dependent lipid-binding family protein%3B FUNCTIONS IN: phosphoinositide binding%3B INVOLVED IN: signal transduction%3B LOCATED IN: chloroplast%3B EXPRESSED IN: 26 plant structures%3B EXPRESSED DURING: 15 growth stages%3B CONTAINS InterPro DOMAIN/s: C2 membrane targeting protein (InterPro:IPR018029)%2C Protein of unknown function DUF946 (InterPro:IPR009291)%2C Vacuolar protein sorting-ass…	.	calcium-dependent lipid-binding family protein%3B FUNCTIONS IN: phosphoinositide binding%3B INVOLVED IN: signal transduction%3B LOCATED IN: chloroplast%3B EXPRESSED IN: 26 plant structures%3B EXPRESSED DURING: 15 growth stages%3B CONTAINS InterPro DOMAIN/s: C2 membrane targeting protein (InterPro:IPR018029)%2C Protein of unknown function DUF946 (InterPro:IPR009291)%2C Vacuolar protein sorting-ass…	scaffold_1	24376064	24402548	26485	-	scaffold_1	24394264	24394896	633	*	0.15760574022234	-0.0405380703840761	230.567132239351	0.433660714285714	1.75778309402396	0.0344816646354	9.8573	-0.2360714	0.33571429	0.262962963	0.312741935	0.301428571	0.5375	NO	NO	NO	0.0357142857142857	0.125	A	B	-0.340332877801514	0.0361006138947744	0.825101242959561	-1.48851844696801	1.43100835163397	1.76949179724308	0.868909165169883	-1.50989931393752	-0.376433491696288	2.31361968992757
AL1G54650	AT1G48090	OG0013842	.	protein_coding	calcium-dependent lipid-binding family protein	.	calcium-dependent lipid-binding family protein%3B FUNCTIONS IN: phosphoinositide binding%3B INVOLVED IN: signal transduction%3B LOCATED IN: chloroplast%3B EXPRESSED IN: 26 plant structures%3B EXPRESSED DURING: 15 growth stages%3B CONTAINS InterPro DOMAIN/s: C2 membrane targeting protein (InterPro:IPR018029)%2C Protein of unknown function DUF946 (InterPro:IPR009291)%2C Vacuolar protein sorting-ass…	.	calcium-dependent lipid-binding family protein%3B FUNCTIONS IN: phosphoinositide binding%3B INVOLVED IN: signal transduction%3B LOCATED IN: chloroplast%3B EXPRESSED IN: 26 plant structures%3B EXPRESSED DURING: 15 growth stages%3B CONTAINS InterPro DOMAIN/s: C2 membrane targeting protein (InterPro:IPR018029)%2C Protein of unknown function DUF946 (InterPro:IPR009291)%2C Vacuolar protein sorting-ass…	scaffold_1	24376064	24402548	26485	-	scaffold_1	24393659	24393968	310	*	0.253378430293494	-0.115214724297426	216.032356485222	0.401696428571429	3.7640059172398	0.00174139855141	10.8406	-0.1005357	0.37053571	0.196613757	0.144112903	0.225714286	0.32625	NO	NO	NO	0.0357142857142857	0.125	B	B	-2.06224273914479	0.465292932813395	-0.163760552037775	-4.04521881766889	-0.290901509709304	2.1986841161617	-0.119952629827453	-4.0665996846384	-2.52753567195819	3.88145826563112
AL1G54650	AT1G48090	OG0013842	.	protein_coding	calcium-dependent lipid-binding family protein	.	calcium-dependent lipid-binding family protein%3B FUNCTIONS IN: phosphoinositide binding%3B INVOLVED IN: signal transduction%3B LOCATED IN: chloroplast%3B EXPRESSED IN: 26 plant structures%3B EXPRESSED DURING: 15 growth stages%3B CONTAINS InterPro DOMAIN/s: C2 membrane targeting protein (InterPro:IPR018029)%2C Protein of unknown function DUF946 (InterPro:IPR009291)%2C Vacuolar protein sorting-ass…	.	calcium-dependent lipid-binding family protein%3B FUNCTIONS IN: phosphoinositide binding%3B INVOLVED IN: signal transduction%3B LOCATED IN: chloroplast%3B EXPRESSED IN: 26 plant structures%3B EXPRESSED DURING: 15 growth stages%3B CONTAINS InterPro DOMAIN/s: C2 membrane targeting protein (InterPro:IPR018029)%2C Protein of unknown function DUF946 (InterPro:IPR009291)%2C Vacuolar protein sorting-ass…	scaffold_1	24376064	24402548	26485	-	scaffold_1	24400598	24400923	326	*	0.176255275926452	-0.049921146755121	253.681614708228	0.470535714285714	1.76139080947001	0.0559616201193	25.6507	-0.3578571	0.36071429	0.267724868	0.31983871	0.177142857	0.535	NO	NO	NO	0.0357142857142857	0.125	A	B	0.306393830684226	1.22428566521684	0.711728553087257	-3.34604519486193	2.07773506011971	2.95767684856515	0.755536475297579	-3.36742606183144	-0.917891834532614	4.05777374794919
AL1G54650	AT1G48090	OG0013842	.	protein_coding	calcium-dependent lipid-binding family protein	.	calcium-dependent lipid-binding family protein%3B FUNCTIONS IN: phosphoinositide binding%3B INVOLVED IN: signal transduction%3B LOCATED IN: chloroplast%3B EXPRESSED IN: 26 plant structures%3B EXPRESSED DURING: 15 growth stages%3B CONTAINS InterPro DOMAIN/s: C2 membrane targeting protein (InterPro:IPR018029)%2C Protein of unknown function DUF946 (InterPro:IPR009291)%2C Vacuolar protein sorting-ass…	.	calcium-dependent lipid-binding family protein%3B FUNCTIONS IN: phosphoinositide binding%3B INVOLVED IN: signal transduction%3B LOCATED IN: chloroplast%3B EXPRESSED IN: 26 plant structures%3B EXPRESSED DURING: 15 growth stages%3B CONTAINS InterPro DOMAIN/s: C2 membrane targeting protein (InterPro:IPR018029)%2C Protein of unknown function DUF946 (InterPro:IPR009291)%2C Vacuolar protein sorting-ass…	scaffold_1	24376064	24402548	26485	-	scaffold_1	24394264	24394896	633	*	0.15760574022234	-0.0405380703840761	230.567132239351	0.433660714285714	1.75778309402396	0.0344816646354	9.8573	-0.2360714	0.33571429	0.262962963	0.312741935	0.301428571	0.5375	NO	NO	NO	0.0357142857142857	0.125	B	B	-0.340332877801514	0.0361006138947744	0.825101242959561	-1.48851844696801	1.43100835163397	1.76949179724308	0.868909165169883	-1.50989931393752	-0.376433491696288	2.31361968992757
AL1G54650	AT1G48090	OG0013842	.	protein_coding	calcium-dependent lipid-binding family protein	.	calcium-dependent lipid-binding family protein%3B FUNCTIONS IN: phosphoinositide binding%3B INVOLVED IN: signal transduction%3B LOCATED IN: chloroplast%3B EXPRESSED IN: 26 plant structures%3B EXPRESSED DURING: 15 growth stages%3B CONTAINS InterPro DOMAIN/s: C2 membrane targeting protein (InterPro:IPR018029)%2C Protein of unknown function DUF946 (InterPro:IPR009291)%2C Vacuolar protein sorting-ass…	.	calcium-dependent lipid-binding family protein%3B FUNCTIONS IN: phosphoinositide binding%3B INVOLVED IN: signal transduction%3B LOCATED IN: chloroplast%3B EXPRESSED IN: 26 plant structures%3B EXPRESSED DURING: 15 growth stages%3B CONTAINS InterPro DOMAIN/s: C2 membrane targeting protein (InterPro:IPR018029)%2C Protein of unknown function DUF946 (InterPro:IPR009291)%2C Vacuolar protein sorting-ass…	scaffold_1	24376064	24402548	26485	-	scaffold_1	24396636	24397096	461	*	0.161845389824247	-0.0272101313639908	232.682590493171	0.450267857142857	1.85778329846664	0.0184305763572	13.4157	-0.2719643	0.34267857	0.283174603	0.298629032	0.234285714	0.50625	NO	NO	NO	0.0357142857142857	0.125	B	B	0.0658923359660852	0.891473375809775	0.193678345198522	-2.25428003385184	1.83723356540157	2.62486455915808	0.237486267408844	-2.27566090082135	-0.82558103984369	2.44795837905036
AL1G54650	AT1G48090	OG0013842	.	protein_coding	calcium-dependent lipid-binding family protein	.	calcium-dependent lipid-binding family protein%3B FUNCTIONS IN: phosphoinositide binding%3B INVOLVED IN: signal transduction%3B LOCATED IN: chloroplast%3B EXPRESSED IN: 26 plant structures%3B EXPRESSED DURING: 15 growth stages%3B CONTAINS InterPro DOMAIN/s: C2 membrane targeting protein (InterPro:IPR018029)%2C Protein of unknown function DUF946 (InterPro:IPR009291)%2C Vacuolar protein sorting-ass…	.	calcium-dependent lipid-binding family protein%3B FUNCTIONS IN: phosphoinositide binding%3B INVOLVED IN: signal transduction%3B LOCATED IN: chloroplast%3B EXPRESSED IN: 26 plant structures%3B EXPRESSED DURING: 15 growth stages%3B CONTAINS InterPro DOMAIN/s: C2 membrane targeting protein (InterPro:IPR018029)%2C Protein of unknown function DUF946 (InterPro:IPR009291)%2C Vacuolar protein sorting-ass…	scaffold_1	24376064	24402548	26485	-	scaffold_1	24396636	24397096	461	*	0.161845389824247	-0.0272101313639908	232.682590493171	0.450267857142857	1.85778329846664	0.0184305763572	13.4157	-0.2719643	0.34267857	0.283174603	0.298629032	0.234285714	0.50625	NO	MODERATE	NO	0.0357142857142857	0.125	B	B	0.0658923359660852	0.891473375809775	0.193678345198522	-2.25428003385184	1.83723356540157	2.62486455915808	0.237486267408844	-2.27566090082135	-0.82558103984369	2.44795837905036
AL1G54650	AT1G48090	OG0013842	.	protein_coding	calcium-dependent lipid-binding family protein	.	calcium-dependent lipid-binding family protein%3B FUNCTIONS IN: phosphoinositide binding%3B INVOLVED IN: signal transduction%3B LOCATED IN: chloroplast%3B EXPRESSED IN: 26 plant structures%3B EXPRESSED DURING: 15 growth stages%3B CONTAINS InterPro DOMAIN/s: C2 membrane targeting protein (InterPro:IPR018029)%2C Protein of unknown function DUF946 (InterPro:IPR009291)%2C Vacuolar protein sorting-ass…	.	calcium-dependent lipid-binding family protein%3B FUNCTIONS IN: phosphoinositide binding%3B INVOLVED IN: signal transduction%3B LOCATED IN: chloroplast%3B EXPRESSED IN: 26 plant structures%3B EXPRESSED DURING: 15 growth stages%3B CONTAINS InterPro DOMAIN/s: C2 membrane targeting protein (InterPro:IPR018029)%2C Protein of unknown function DUF946 (InterPro:IPR009291)%2C Vacuolar protein sorting-ass…	scaffold_1	24376064	24402548	26485	-	scaffold_1	24394264	24394896	633	*	0.15760574022234	-0.0405380703840761	230.567132239351	0.433660714285714	1.75778309402396	0.0344816646354	9.8573	-0.2360714	0.33571429	0.262962963	0.312741935	0.301428571	0.5375	NO	MODERATE	NO	0.0357142857142857	0.125	B	B	-0.340332877801514	0.0361006138947744	0.825101242959561	-1.48851844696801	1.43100835163397	1.76949179724308	0.868909165169883	-1.50989931393752	-0.376433491696288	2.31361968992757
AL1G54650	AT1G48090	OG0013842	.	protein_coding	calcium-dependent lipid-binding family protein	.	calcium-dependent lipid-binding family protein%3B FUNCTIONS IN: phosphoinositide binding%3B INVOLVED IN: signal transduction%3B LOCATED IN: chloroplast%3B EXPRESSED IN: 26 plant structures%3B EXPRESSED DURING: 15 growth stages%3B CONTAINS InterPro DOMAIN/s: C2 membrane targeting protein (InterPro:IPR018029)%2C Protein of unknown function DUF946 (InterPro:IPR009291)%2C Vacuolar protein sorting-ass…	.	calcium-dependent lipid-binding family protein%3B FUNCTIONS IN: phosphoinositide binding%3B INVOLVED IN: signal transduction%3B LOCATED IN: chloroplast%3B EXPRESSED IN: 26 plant structures%3B EXPRESSED DURING: 15 growth stages%3B CONTAINS InterPro DOMAIN/s: C2 membrane targeting protein (InterPro:IPR018029)%2C Protein of unknown function DUF946 (InterPro:IPR009291)%2C Vacuolar protein sorting-ass…	scaffold_1	24376064	24402548	26485	-	scaffold_1	24382334	24382951	618	*	0.145684905269479	-0.0124274859873721	216.550784256451	0.431785714285714	1.7098197670075	0.0344816646354	6.5931	-0.2501786	0.30660714	0.277777778	0.324596774	0.198571429	0.44875	NO	NO	NO	0.0357142857142857	0.125	A	B	0.949078497241935	1.01947810250481	1.16836855396182	-2.9576154044136	2.72041972667742	2.75286928585312	1.21217647617214	-2.97899627138311	-0.070399605262875	4.12598395837542
AL1G54650	AT1G48090	OG0013842	.	protein_coding	calcium-dependent lipid-binding family protein	.	calcium-dependent lipid-binding family protein%3B FUNCTIONS IN: phosphoinositide binding%3B INVOLVED IN: signal transduction%3B LOCATED IN: chloroplast%3B EXPRESSED IN: 26 plant structures%3B EXPRESSED DURING: 15 growth stages%3B CONTAINS InterPro DOMAIN/s: C2 membrane targeting protein (InterPro:IPR018029)%2C Protein of unknown function DUF946 (InterPro:IPR009291)%2C Vacuolar protein sorting-ass…	.	calcium-dependent lipid-binding family protein%3B FUNCTIONS IN: phosphoinositide binding%3B INVOLVED IN: signal transduction%3B LOCATED IN: chloroplast%3B EXPRESSED IN: 26 plant structures%3B EXPRESSED DURING: 15 growth stages%3B CONTAINS InterPro DOMAIN/s: C2 membrane targeting protein (InterPro:IPR018029)%2C Protein of unknown function DUF946 (InterPro:IPR009291)%2C Vacuolar protein sorting-ass…	scaffold_1	24376064	24402548	26485	-	scaffold_1	24391517	24392203	687	*	0.166947027182655	-0.0180893657106379	194.081656659728	0.410535714285714	2.139110383524	0.00373213815884	5.9393	-0.1482143	0.3225	0.281164021	0.247258065	0.264285714	0.4125	NO	NO	NO	0.0357142857142857	0.125	A	B	0.757081505660233	0.793587408337107	1.34944993361898	-2.23347129507782	2.52842273509572	2.52697859168541	1.3932578558293	-2.25485216204733	-0.0365059026768739	3.5829212286968
AL1G54650	AT1G48090	OG0013842	.	protein_coding	calcium-dependent lipid-binding family protein	.	calcium-dependent lipid-binding family protein%3B FUNCTIONS IN: phosphoinositide binding%3B INVOLVED IN: signal transduction%3B LOCATED IN: chloroplast%3B EXPRESSED IN: 26 plant structures%3B EXPRESSED DURING: 15 growth stages%3B CONTAINS InterPro DOMAIN/s: C2 membrane targeting protein (InterPro:IPR018029)%2C Protein of unknown function DUF946 (InterPro:IPR009291)%2C Vacuolar protein sorting-ass…	.	calcium-dependent lipid-binding family protein%3B FUNCTIONS IN: phosphoinositide binding%3B INVOLVED IN: signal transduction%3B LOCATED IN: chloroplast%3B EXPRESSED IN: 26 plant structures%3B EXPRESSED DURING: 15 growth stages%3B CONTAINS InterPro DOMAIN/s: C2 membrane targeting protein (InterPro:IPR018029)%2C Protein of unknown function DUF946 (InterPro:IPR009291)%2C Vacuolar protein sorting-ass…	scaffold_1	24376064	24402548	26485	-	scaffold_1	24391158	24391513	356	*	0.217411292400106	-0.0727998402322036	252.071261794553	0.471428571428571	2.86837630445	0.0124919789166	13.7172	-0.2448214	0.39089286	0.25978836	0.283306452	0.221428571	0.46625	NO	NO	NO	0.0357142857142857	0.125	A	B	0.0658923359660852	0.329758516312779	0.0614102070141639	-3.06027184903209	1.83723356540157	2.06314969966109	0.105218129224486	-3.0816527160016	-0.263866180346694	3.12168205604625
AL1G54650	AT1G48090	OG0013842	.	protein_coding	calcium-dependent lipid-binding family protein	.	calcium-dependent lipid-binding family protein%3B FUNCTIONS IN: phosphoinositide binding%3B INVOLVED IN: signal transduction%3B LOCATED IN: chloroplast%3B EXPRESSED IN: 26 plant structures%3B EXPRESSED DURING: 15 growth stages%3B CONTAINS InterPro DOMAIN/s: C2 membrane targeting protein (InterPro:IPR018029)%2C Protein of unknown function DUF946 (InterPro:IPR009291)%2C Vacuolar protein sorting-ass…	.	calcium-dependent lipid-binding family protein%3B FUNCTIONS IN: phosphoinositide binding%3B INVOLVED IN: signal transduction%3B LOCATED IN: chloroplast%3B EXPRESSED IN: 26 plant structures%3B EXPRESSED DURING: 15 growth stages%3B CONTAINS InterPro DOMAIN/s: C2 membrane targeting protein (InterPro:IPR018029)%2C Protein of unknown function DUF946 (InterPro:IPR009291)%2C Vacuolar protein sorting-ass…	scaffold_1	24376064	24402548	26485	-	scaffold_1	24398825	24399432	608	*	0.208336845106627	-0.0704427164484166	218.442182969973	0.424017857142857	2.94643740474084	0.00388141334479	18.0058	-0.2728571	0.3725	0.250899471	0.211451613	0.247142857	0.52	NO	NO	NO	0.0357142857142857	0.125	A	B	-0.817293825309746	1.91701712733112	1.24709958859536	-4.03966982066249	0.954047404125741	3.65040831067943	1.29090751080568	-4.061050687632	-2.73431095264087	5.28676940925785
AL1G54650	AT1G48090	OG0013842	.	protein_coding	calcium-dependent lipid-binding family protein	.	calcium-dependent lipid-binding family protein%3B FUNCTIONS IN: phosphoinositide binding%3B INVOLVED IN: signal transduction%3B LOCATED IN: chloroplast%3B EXPRESSED IN: 26 plant structures%3B EXPRESSED DURING: 15 growth stages%3B CONTAINS InterPro DOMAIN/s: C2 membrane targeting protein (InterPro:IPR018029)%2C Protein of unknown function DUF946 (InterPro:IPR009291)%2C Vacuolar protein sorting-ass…	.	calcium-dependent lipid-binding family protein%3B FUNCTIONS IN: phosphoinositide binding%3B INVOLVED IN: signal transduction%3B LOCATED IN: chloroplast%3B EXPRESSED IN: 26 plant structures%3B EXPRESSED DURING: 15 growth stages%3B CONTAINS InterPro DOMAIN/s: C2 membrane targeting protein (InterPro:IPR018029)%2C Protein of unknown function DUF946 (InterPro:IPR009291)%2C Vacuolar protein sorting-ass…	scaffold_1	24376064	24402548	26485	-	scaffold_1	24396636	24397096	461	*	0.161845389824247	-0.0272101313639908	232.682590493171	0.450267857142857	1.85778329846664	0.0184305763572	13.4157	-0.2719643	0.34267857	0.283174603	0.298629032	0.234285714	0.50625	NO	NO	NO	0.0357142857142857	0.125	A	B	0.0658923359660852	0.891473375809775	0.193678345198522	-2.25428003385184	1.83723356540157	2.62486455915808	0.237486267408844	-2.27566090082135	-0.82558103984369	2.44795837905036
AL1G54650	AT1G48090	OG0013842	.	protein_coding	calcium-dependent lipid-binding family protein	.	calcium-dependent lipid-binding family protein%3B FUNCTIONS IN: phosphoinositide binding%3B INVOLVED IN: signal transduction%3B LOCATED IN: chloroplast%3B EXPRESSED IN: 26 plant structures%3B EXPRESSED DURING: 15 growth stages%3B CONTAINS InterPro DOMAIN/s: C2 membrane targeting protein (InterPro:IPR018029)%2C Protein of unknown function DUF946 (InterPro:IPR009291)%2C Vacuolar protein sorting-ass…	.	calcium-dependent lipid-binding family protein%3B FUNCTIONS IN: phosphoinositide binding%3B INVOLVED IN: signal transduction%3B LOCATED IN: chloroplast%3B EXPRESSED IN: 26 plant structures%3B EXPRESSED DURING: 15 growth stages%3B CONTAINS InterPro DOMAIN/s: C2 membrane targeting protein (InterPro:IPR018029)%2C Protein of unknown function DUF946 (InterPro:IPR009291)%2C Vacuolar protein sorting-ass…	scaffold_1	24376064	24402548	26485	-	scaffold_1	24400925	24401332	408	*	0.199661550959088	-0.051267305117028	251.630866604345	0.492232142857143	3.28167212688612	0.00620310566931	32.2374	-0.3460714	0.40321429	0.293121693	0.304193548	0.231428571	0.5775	NO	MODERATE	NO	0.0357142857142857	0.125	B	B	-1.07598450870403	0.718290510281211	0.472386207801278	-3.54580908709249	0.695356720731456	2.45168169362952	0.5161941300116	-3.567189954062	-1.79427501898524	4.01819529489377
AL1G54650	AT1G48090	OG0013842	.	protein_coding	calcium-dependent lipid-binding family protein	.	calcium-dependent lipid-binding family protein%3B FUNCTIONS IN: phosphoinositide binding%3B INVOLVED IN: signal transduction%3B LOCATED IN: chloroplast%3B EXPRESSED IN: 26 plant structures%3B EXPRESSED DURING: 15 growth stages%3B CONTAINS InterPro DOMAIN/s: C2 membrane targeting protein (InterPro:IPR018029)%2C Protein of unknown function DUF946 (InterPro:IPR009291)%2C Vacuolar protein sorting-ass…	.	calcium-dependent lipid-binding family protein%3B FUNCTIONS IN: phosphoinositide binding%3B INVOLVED IN: signal transduction%3B LOCATED IN: chloroplast%3B EXPRESSED IN: 26 plant structures%3B EXPRESSED DURING: 15 growth stages%3B CONTAINS InterPro DOMAIN/s: C2 membrane targeting protein (InterPro:IPR018029)%2C Protein of unknown function DUF946 (InterPro:IPR009291)%2C Vacuolar protein sorting-ass…	scaffold_1	24376064	24402548	26485	-	scaffold_1	24387796	24388275	480	*	0.194576509145904	-0.0570737658747573	226.092831309873	0.429285714285714	2.43307496767434	0.031008752414	20.6507	-0.2041071	0.36089286	0.259365079	0.237177419	0.287142857	0.49125	NO	NO	NO	0.0357142857142857	0.125	A	B	-0.39085840190195	-0.019619090666592	0.278707862602756	-3.78164145986468	1.38048282753354	1.71377209268171	0.322515784813078	-3.80302232683419	-0.371239311235358	4.06034932246744
AL1G54650	AT1G48090	OG0013842	.	protein_coding	calcium-dependent lipid-binding family protein	.	calcium-dependent lipid-binding family protein%3B FUNCTIONS IN: phosphoinositide binding%3B INVOLVED IN: signal transduction%3B LOCATED IN: chloroplast%3B EXPRESSED IN: 26 plant structures%3B EXPRESSED DURING: 15 growth stages%3B CONTAINS InterPro DOMAIN/s: C2 membrane targeting protein (InterPro:IPR018029)%2C Protein of unknown function DUF946 (InterPro:IPR009291)%2C Vacuolar protein sorting-ass…	.	calcium-dependent lipid-binding family protein%3B FUNCTIONS IN: phosphoinositide binding%3B INVOLVED IN: signal transduction%3B LOCATED IN: chloroplast%3B EXPRESSED IN: 26 plant structures%3B EXPRESSED DURING: 15 growth stages%3B CONTAINS InterPro DOMAIN/s: C2 membrane targeting protein (InterPro:IPR018029)%2C Protein of unknown function DUF946 (InterPro:IPR009291)%2C Vacuolar protein sorting-ass…	scaffold_1	24376064	24402548	26485	-	scaffold_1	24393659	24393968	310	*	0.253378430293494	-0.115214724297426	216.032356485222	0.401696428571429	3.7640059172398	0.00174139855141	10.8406	-0.1005357	0.37053571	0.196613757	0.144112903	0.225714286	0.32625	NO	NO	NO	0.0357142857142857	0.125	B	B	-2.06224273914479	0.465292932813395	-0.163760552037775	-4.04521881766889	-0.290901509709304	2.1986841161617	-0.119952629827453	-4.0665996846384	-2.52753567195819	3.88145826563112
AL1G54650	AT1G48090	OG0013842	.	protein_coding	calcium-dependent lipid-binding family protein	.	calcium-dependent lipid-binding family protein%3B FUNCTIONS IN: phosphoinositide binding%3B INVOLVED IN: signal transduction%3B LOCATED IN: chloroplast%3B EXPRESSED IN: 26 plant structures%3B EXPRESSED DURING: 15 growth stages%3B CONTAINS InterPro DOMAIN/s: C2 membrane targeting protein (InterPro:IPR018029)%2C Protein of unknown function DUF946 (InterPro:IPR009291)%2C Vacuolar protein sorting-ass…	.	calcium-dependent lipid-binding family protein%3B FUNCTIONS IN: phosphoinositide binding%3B INVOLVED IN: signal transduction%3B LOCATED IN: chloroplast%3B EXPRESSED IN: 26 plant structures%3B EXPRESSED DURING: 15 growth stages%3B CONTAINS InterPro DOMAIN/s: C2 membrane targeting protein (InterPro:IPR018029)%2C Protein of unknown function DUF946 (InterPro:IPR009291)%2C Vacuolar protein sorting-ass…	scaffold_1	24376064	24402548	26485	-	scaffold_1	24393992	24394258	267	*	0.237795835830657	-0.172681338504631	243.71768183101	0.442946428571429	4.12037020527934	0.00129979298925	15.7952	-0.2601786	0.39375	0.143280423	0.30733871	0.188571429	0.44875	NO	MODERATE	NO	0.0357142857142857	0.125	B	B	-0.279702248880979	0.308675384857119	0.784161104950113	-4.14510076378418	1.49163898055451	2.04206656820543	0.827969027160435	-4.16648163075369	-0.588377633738098	4.92926186873429
AL1G54650	AT1G48090	OG0013842	.	protein_coding	calcium-dependent lipid-binding family protein	.	calcium-dependent lipid-binding family protein%3B FUNCTIONS IN: phosphoinositide binding%3B INVOLVED IN: signal transduction%3B LOCATED IN: chloroplast%3B EXPRESSED IN: 26 plant structures%3B EXPRESSED DURING: 15 growth stages%3B CONTAINS InterPro DOMAIN/s: C2 membrane targeting protein (InterPro:IPR018029)%2C Protein of unknown function DUF946 (InterPro:IPR009291)%2C Vacuolar protein sorting-ass…	.	calcium-dependent lipid-binding family protein%3B FUNCTIONS IN: phosphoinositide binding%3B INVOLVED IN: signal transduction%3B LOCATED IN: chloroplast%3B EXPRESSED IN: 26 plant structures%3B EXPRESSED DURING: 15 growth stages%3B CONTAINS InterPro DOMAIN/s: C2 membrane targeting protein (InterPro:IPR018029)%2C Protein of unknown function DUF946 (InterPro:IPR009291)%2C Vacuolar protein sorting-ass…	scaffold_1	24376064	24402548	26485	-	scaffold_1	24400925	24401332	408	*	0.199661550959088	-0.051267305117028	251.630866604345	0.492232142857143	3.28167212688612	0.00620310566931	32.2374	-0.3460714	0.40321429	0.293121693	0.304193548	0.231428571	0.5775	NO	NO	NO	0.0357142857142857	0.125	A	B	-1.07598450870403	0.718290510281211	0.472386207801278	-3.54580908709249	0.695356720731456	2.45168169362952	0.5161941300116	-3.567189954062	-1.79427501898524	4.01819529489377
AL1G54650	AT1G48090	OG0013842	.	protein_coding	calcium-dependent lipid-binding family protein	.	calcium-dependent lipid-binding family protein%3B FUNCTIONS IN: phosphoinositide binding%3B INVOLVED IN: signal transduction%3B LOCATED IN: chloroplast%3B EXPRESSED IN: 26 plant structures%3B EXPRESSED DURING: 15 growth stages%3B CONTAINS InterPro DOMAIN/s: C2 membrane targeting protein (InterPro:IPR018029)%2C Protein of unknown function DUF946 (InterPro:IPR009291)%2C Vacuolar protein sorting-ass…	.	calcium-dependent lipid-binding family protein%3B FUNCTIONS IN: phosphoinositide binding%3B INVOLVED IN: signal transduction%3B LOCATED IN: chloroplast%3B EXPRESSED IN: 26 plant structures%3B EXPRESSED DURING: 15 growth stages%3B CONTAINS InterPro DOMAIN/s: C2 membrane targeting protein (InterPro:IPR018029)%2C Protein of unknown function DUF946 (InterPro:IPR009291)%2C Vacuolar protein sorting-ass…	scaffold_1	24376064	24402548	26485	-	scaffold_1	24387796	24388275	480	*	0.194576509145904	-0.0570737658747573	226.092831309873	0.429285714285714	2.43307496767434	0.031008752414	20.6507	-0.2041071	0.36089286	0.259365079	0.237177419	0.287142857	0.49125	NO	MODERATE	NO	0.0357142857142857	0.125	B	B	-0.39085840190195	-0.019619090666592	0.278707862602756	-3.78164145986468	1.38048282753354	1.71377209268171	0.322515784813078	-3.80302232683419	-0.371239311235358	4.06034932246744
AL1G54650	AT1G48090	OG0013842	.	protein_coding	calcium-dependent lipid-binding family protein	.	calcium-dependent lipid-binding family protein%3B FUNCTIONS IN: phosphoinositide binding%3B INVOLVED IN: signal transduction%3B LOCATED IN: chloroplast%3B EXPRESSED IN: 26 plant structures%3B EXPRESSED DURING: 15 growth stages%3B CONTAINS InterPro DOMAIN/s: C2 membrane targeting protein (InterPro:IPR018029)%2C Protein of unknown function DUF946 (InterPro:IPR009291)%2C Vacuolar protein sorting-ass…	.	calcium-dependent lipid-binding family protein%3B FUNCTIONS IN: phosphoinositide binding%3B INVOLVED IN: signal transduction%3B LOCATED IN: chloroplast%3B EXPRESSED IN: 26 plant structures%3B EXPRESSED DURING: 15 growth stages%3B CONTAINS InterPro DOMAIN/s: C2 membrane targeting protein (InterPro:IPR018029)%2C Protein of unknown function DUF946 (InterPro:IPR009291)%2C Vacuolar protein sorting-ass…	scaffold_1	24376064	24402548	26485	-	scaffold_1	24400598	24400923	326	*	0.176255275926452	-0.049921146755121	253.681614708228	0.470535714285714	1.76139080947001	0.0559616201193	25.6507	-0.3578571	0.36071429	0.267724868	0.31983871	0.177142857	0.535	NO	MODERATE	NO	0.0357142857142857	0.125	B	B	0.306393830684226	1.22428566521684	0.711728553087257	-3.34604519486193	2.07773506011971	2.95767684856515	0.755536475297579	-3.36742606183144	-0.917891834532614	4.05777374794919
AL1G54650	AT1G48090	OG0013842	.	protein_coding	calcium-dependent lipid-binding family protein	.	calcium-dependent lipid-binding family protein%3B FUNCTIONS IN: phosphoinositide binding%3B INVOLVED IN: signal transduction%3B LOCATED IN: chloroplast%3B EXPRESSED IN: 26 plant structures%3B EXPRESSED DURING: 15 growth stages%3B CONTAINS InterPro DOMAIN/s: C2 membrane targeting protein (InterPro:IPR018029)%2C Protein of unknown function DUF946 (InterPro:IPR009291)%2C Vacuolar protein sorting-ass…	.	calcium-dependent lipid-binding family protein%3B FUNCTIONS IN: phosphoinositide binding%3B INVOLVED IN: signal transduction%3B LOCATED IN: chloroplast%3B EXPRESSED IN: 26 plant structures%3B EXPRESSED DURING: 15 growth stages%3B CONTAINS InterPro DOMAIN/s: C2 membrane targeting protein (InterPro:IPR018029)%2C Protein of unknown function DUF946 (InterPro:IPR009291)%2C Vacuolar protein sorting-ass…	scaffold_1	24376064	24402548	26485	-	scaffold_1	24387796	24388275	480	*	0.194576509145904	-0.0570737658747573	226.092831309873	0.429285714285714	2.43307496767434	0.031008752414	20.6507	-0.2041071	0.36089286	0.259365079	0.237177419	0.287142857	0.49125	NO	NO	NO	0.0357142857142857	0.125	B	B	-0.39085840190195	-0.019619090666592	0.278707862602756	-3.78164145986468	1.38048282753354	1.71377209268171	0.322515784813078	-3.80302232683419	-0.371239311235358	4.06034932246744
AL1G54650	AT1G48090	OG0013842	.	protein_coding	calcium-dependent lipid-binding family protein	.	calcium-dependent lipid-binding family protein%3B FUNCTIONS IN: phosphoinositide binding%3B INVOLVED IN: signal transduction%3B LOCATED IN: chloroplast%3B EXPRESSED IN: 26 plant structures%3B EXPRESSED DURING: 15 growth stages%3B CONTAINS InterPro DOMAIN/s: C2 membrane targeting protein (InterPro:IPR018029)%2C Protein of unknown function DUF946 (InterPro:IPR009291)%2C Vacuolar protein sorting-ass…	.	calcium-dependent lipid-binding family protein%3B FUNCTIONS IN: phosphoinositide binding%3B INVOLVED IN: signal transduction%3B LOCATED IN: chloroplast%3B EXPRESSED IN: 26 plant structures%3B EXPRESSED DURING: 15 growth stages%3B CONTAINS InterPro DOMAIN/s: C2 membrane targeting protein (InterPro:IPR018029)%2C Protein of unknown function DUF946 (InterPro:IPR009291)%2C Vacuolar protein sorting-ass…	scaffold_1	24376064	24402548	26485	-	scaffold_1	24393659	24393968	310	*	0.253378430293494	-0.115214724297426	216.032356485222	0.401696428571429	3.7640059172398	0.00174139855141	10.8406	-0.1005357	0.37053571	0.196613757	0.144112903	0.225714286	0.32625	NO	NO	NO	0.0357142857142857	0.125	A	B	-2.06224273914479	0.465292932813395	-0.163760552037775	-4.04521881766889	-0.290901509709304	2.1986841161617	-0.119952629827453	-4.0665996846384	-2.52753567195819	3.88145826563112
AL1G54650	AT1G48090	OG0013842	.	protein_coding	calcium-dependent lipid-binding family protein	.	calcium-dependent lipid-binding family protein%3B FUNCTIONS IN: phosphoinositide binding%3B INVOLVED IN: signal transduction%3B LOCATED IN: chloroplast%3B EXPRESSED IN: 26 plant structures%3B EXPRESSED DURING: 15 growth stages%3B CONTAINS InterPro DOMAIN/s: C2 membrane targeting protein (InterPro:IPR018029)%2C Protein of unknown function DUF946 (InterPro:IPR009291)%2C Vacuolar protein sorting-ass…	.	calcium-dependent lipid-binding family protein%3B FUNCTIONS IN: phosphoinositide binding%3B INVOLVED IN: signal transduction%3B LOCATED IN: chloroplast%3B EXPRESSED IN: 26 plant structures%3B EXPRESSED DURING: 15 growth stages%3B CONTAINS InterPro DOMAIN/s: C2 membrane targeting protein (InterPro:IPR018029)%2C Protein of unknown function DUF946 (InterPro:IPR009291)%2C Vacuolar protein sorting-ass…	scaffold_1	24376064	24402548	26485	-	scaffold_1	24400598	24400923	326	*	0.176255275926452	-0.049921146755121	253.681614708228	0.470535714285714	1.76139080947001	0.0559616201193	25.6507	-0.3578571	0.36071429	0.267724868	0.31983871	0.177142857	0.535	NO	NO	NO	0.0357142857142857	0.125	B	B	0.306393830684226	1.22428566521684	0.711728553087257	-3.34604519486193	2.07773506011971	2.95767684856515	0.755536475297579	-3.36742606183144	-0.917891834532614	4.05777374794919
AL1G54650	AT1G48090	OG0013842	.	protein_coding	calcium-dependent lipid-binding family protein	.	calcium-dependent lipid-binding family protein%3B FUNCTIONS IN: phosphoinositide binding%3B INVOLVED IN: signal transduction%3B LOCATED IN: chloroplast%3B EXPRESSED IN: 26 plant structures%3B EXPRESSED DURING: 15 growth stages%3B CONTAINS InterPro DOMAIN/s: C2 membrane targeting protein (InterPro:IPR018029)%2C Protein of unknown function DUF946 (InterPro:IPR009291)%2C Vacuolar protein sorting-ass…	.	calcium-dependent lipid-binding family protein%3B FUNCTIONS IN: phosphoinositide binding%3B INVOLVED IN: signal transduction%3B LOCATED IN: chloroplast%3B EXPRESSED IN: 26 plant structures%3B EXPRESSED DURING: 15 growth stages%3B CONTAINS InterPro DOMAIN/s: C2 membrane targeting protein (InterPro:IPR018029)%2C Protein of unknown function DUF946 (InterPro:IPR009291)%2C Vacuolar protein sorting-ass…	scaffold_1	24376064	24402548	26485	-	scaffold_1	24391158	24391513	356	*	0.217411292400106	-0.0727998402322036	252.071261794553	0.471428571428571	2.86837630445	0.0124919789166	13.7172	-0.2448214	0.39089286	0.25978836	0.283306452	0.221428571	0.46625	NO	MODERATE	NO	0.0357142857142857	0.125	B	B	0.0658923359660852	0.329758516312779	0.0614102070141639	-3.06027184903209	1.83723356540157	2.06314969966109	0.105218129224486	-3.0816527160016	-0.263866180346694	3.12168205604625
AL1G54650	AT1G48090	OG0013842	.	protein_coding	calcium-dependent lipid-binding family protein	.	calcium-dependent lipid-binding family protein%3B FUNCTIONS IN: phosphoinositide binding%3B INVOLVED IN: signal transduction%3B LOCATED IN: chloroplast%3B EXPRESSED IN: 26 plant structures%3B EXPRESSED DURING: 15 growth stages%3B CONTAINS InterPro DOMAIN/s: C2 membrane targeting protein (InterPro:IPR018029)%2C Protein of unknown function DUF946 (InterPro:IPR009291)%2C Vacuolar protein sorting-ass…	.	calcium-dependent lipid-binding family protein%3B FUNCTIONS IN: phosphoinositide binding%3B INVOLVED IN: signal transduction%3B LOCATED IN: chloroplast%3B EXPRESSED IN: 26 plant structures%3B EXPRESSED DURING: 15 growth stages%3B CONTAINS InterPro DOMAIN/s: C2 membrane targeting protein (InterPro:IPR018029)%2C Protein of unknown function DUF946 (InterPro:IPR009291)%2C Vacuolar protein sorting-ass…	scaffold_1	24376064	24402548	26485	-	scaffold_1	24399690	24400092	403	*	0.20366926068986	-0.0940113018059063	218.424067793463	0.416517857142857	2.82900624629495	0.0154629377514	22.3622	-0.2671429	0.36464286	0.217989418	0.252096774	0.142857143	0.41	NO	NO	NO	0.0357142857142857	0.125	A	B	-0.113978529831502	-0.451823285507457	1.17781627811785	-2.87021870156274	1.65736269960398	1.28156789784085	1.22162420032817	-2.89159956853225	0.337844755675955	4.04803497968059
AL1G54650	AT1G48090	OG0013842	.	protein_coding	calcium-dependent lipid-binding family protein	.	calcium-dependent lipid-binding family protein%3B FUNCTIONS IN: phosphoinositide binding%3B INVOLVED IN: signal transduction%3B LOCATED IN: chloroplast%3B EXPRESSED IN: 26 plant structures%3B EXPRESSED DURING: 15 growth stages%3B CONTAINS InterPro DOMAIN/s: C2 membrane targeting protein (InterPro:IPR018029)%2C Protein of unknown function DUF946 (InterPro:IPR009291)%2C Vacuolar protein sorting-ass…	.	calcium-dependent lipid-binding family protein%3B FUNCTIONS IN: phosphoinositide binding%3B INVOLVED IN: signal transduction%3B LOCATED IN: chloroplast%3B EXPRESSED IN: 26 plant structures%3B EXPRESSED DURING: 15 growth stages%3B CONTAINS InterPro DOMAIN/s: C2 membrane targeting protein (InterPro:IPR018029)%2C Protein of unknown function DUF946 (InterPro:IPR009291)%2C Vacuolar protein sorting-ass…	scaffold_1	24376064	24402548	26485	-	scaffold_1	24393659	24393968	310	*	0.253378430293494	-0.115214724297426	216.032356485222	0.401696428571429	3.7640059172398	0.00174139855141	10.8406	-0.1005357	0.37053571	0.196613757	0.144112903	0.225714286	0.32625	NO	NO	NO	0.0357142857142857	0.125	B	B	-2.06224273914479	0.465292932813395	-0.163760552037775	-4.04521881766889	-0.290901509709304	2.1986841161617	-0.119952629827453	-4.0665996846384	-2.52753567195819	3.88145826563112
AL1G54650	AT1G48090	OG0013842	.	protein_coding	calcium-dependent lipid-binding family protein	.	calcium-dependent lipid-binding family protein%3B FUNCTIONS IN: phosphoinositide binding%3B INVOLVED IN: signal transduction%3B LOCATED IN: chloroplast%3B EXPRESSED IN: 26 plant structures%3B EXPRESSED DURING: 15 growth stages%3B CONTAINS InterPro DOMAIN/s: C2 membrane targeting protein (InterPro:IPR018029)%2C Protein of unknown function DUF946 (InterPro:IPR009291)%2C Vacuolar protein sorting-ass…	.	calcium-dependent lipid-binding family protein%3B FUNCTIONS IN: phosphoinositide binding%3B INVOLVED IN: signal transduction%3B LOCATED IN: chloroplast%3B EXPRESSED IN: 26 plant structures%3B EXPRESSED DURING: 15 growth stages%3B CONTAINS InterPro DOMAIN/s: C2 membrane targeting protein (InterPro:IPR018029)%2C Protein of unknown function DUF946 (InterPro:IPR009291)%2C Vacuolar protein sorting-ass…	scaffold_1	24376064	24402548	26485	-	scaffold_1	24397117	24397509	393	*	0.159822358104095	-0.0309031300184515	216.617507016903	0.433035714285714	2.58626334396926	0.0290341256746	12.6442	-0.3239286	0.33357143	0.273015873	0.316774194	0.188571429	0.5125	NO	NO	NO	0.0357142857142857	0.125	B	B	-0.035158712234806	1.12489375978306	1.04082427785548	-4.23665921438986	1.73618251720068	2.85828494313137	1.0846322000658	-4.25804008135937	-1.16005247201787	5.27748349224534
AL1G54650	AT1G48090	OG0013842	.	protein_coding	calcium-dependent lipid-binding family protein	.	calcium-dependent lipid-binding family protein%3B FUNCTIONS IN: phosphoinositide binding%3B INVOLVED IN: signal transduction%3B LOCATED IN: chloroplast%3B EXPRESSED IN: 26 plant structures%3B EXPRESSED DURING: 15 growth stages%3B CONTAINS InterPro DOMAIN/s: C2 membrane targeting protein (InterPro:IPR018029)%2C Protein of unknown function DUF946 (InterPro:IPR009291)%2C Vacuolar protein sorting-ass…	.	calcium-dependent lipid-binding family protein%3B FUNCTIONS IN: phosphoinositide binding%3B INVOLVED IN: signal transduction%3B LOCATED IN: chloroplast%3B EXPRESSED IN: 26 plant structures%3B EXPRESSED DURING: 15 growth stages%3B CONTAINS InterPro DOMAIN/s: C2 membrane targeting protein (InterPro:IPR018029)%2C Protein of unknown function DUF946 (InterPro:IPR009291)%2C Vacuolar protein sorting-ass…	scaffold_1	24376064	24402548	26485	-	scaffold_1	24387004	24387374	371	*	0.146084825572128	-0.0358825856402831	206.098717627831	0.404285714285714	1.88620144911898	0.0344816646354	15.7245	-0.25375	0.30803571	0.250899471	0.297177419	0.17	0.42375	NO	NO	NO	0.0357142857142857	0.125	A	B	-0.613170707943929	1.06013842745498	0.590482759751598	-2.3208679979287	1.15817052149156	2.79352961080329	0.63429068196192	-2.34224886489821	-1.67330913539891	2.9113507576803
AL1G54650	AT1G48090	OG0013842	.	protein_coding	calcium-dependent lipid-binding family protein	.	calcium-dependent lipid-binding family protein%3B FUNCTIONS IN: phosphoinositide binding%3B INVOLVED IN: signal transduction%3B LOCATED IN: chloroplast%3B EXPRESSED IN: 26 plant structures%3B EXPRESSED DURING: 15 growth stages%3B CONTAINS InterPro DOMAIN/s: C2 membrane targeting protein (InterPro:IPR018029)%2C Protein of unknown function DUF946 (InterPro:IPR009291)%2C Vacuolar protein sorting-ass…	.	calcium-dependent lipid-binding family protein%3B FUNCTIONS IN: phosphoinositide binding%3B INVOLVED IN: signal transduction%3B LOCATED IN: chloroplast%3B EXPRESSED IN: 26 plant structures%3B EXPRESSED DURING: 15 growth stages%3B CONTAINS InterPro DOMAIN/s: C2 membrane targeting protein (InterPro:IPR018029)%2C Protein of unknown function DUF946 (InterPro:IPR009291)%2C Vacuolar protein sorting-ass…	scaffold_1	24376064	24402548	26485	-	scaffold_1	24393992	24394258	267	*	0.237795835830657	-0.172681338504631	243.71768183101	0.442946428571429	4.12037020527934	0.00129979298925	15.7952	-0.2601786	0.39375	0.143280423	0.30733871	0.188571429	0.44875	NO	NO	NO	0.0357142857142857	0.125	A	B	-0.279702248880979	0.308675384857119	0.784161104950113	-4.14510076378418	1.49163898055451	2.04206656820543	0.827969027160435	-4.16648163075369	-0.588377633738098	4.92926186873429
AL1G54650	AT1G48090	OG0013842	.	protein_coding	calcium-dependent lipid-binding family protein	.	calcium-dependent lipid-binding family protein%3B FUNCTIONS IN: phosphoinositide binding%3B INVOLVED IN: signal transduction%3B LOCATED IN: chloroplast%3B EXPRESSED IN: 26 plant structures%3B EXPRESSED DURING: 15 growth stages%3B CONTAINS InterPro DOMAIN/s: C2 membrane targeting protein (InterPro:IPR018029)%2C Protein of unknown function DUF946 (InterPro:IPR009291)%2C Vacuolar protein sorting-ass…	.	calcium-dependent lipid-binding family protein%3B FUNCTIONS IN: phosphoinositide binding%3B INVOLVED IN: signal transduction%3B LOCATED IN: chloroplast%3B EXPRESSED IN: 26 plant structures%3B EXPRESSED DURING: 15 growth stages%3B CONTAINS InterPro DOMAIN/s: C2 membrane targeting protein (InterPro:IPR018029)%2C Protein of unknown function DUF946 (InterPro:IPR009291)%2C Vacuolar protein sorting-ass…	scaffold_1	24376064	24402548	26485	-	scaffold_1	24393992	24394258	267	*	0.237795835830657	-0.172681338504631	243.71768183101	0.442946428571429	4.12037020527934	0.00129979298925	15.7952	-0.2601786	0.39375	0.143280423	0.30733871	0.188571429	0.44875	NO	NO	NO	0.0357142857142857	0.125	B	B	-0.279702248880979	0.308675384857119	0.784161104950113	-4.14510076378418	1.49163898055451	2.04206656820543	0.827969027160435	-4.16648163075369	-0.588377633738098	4.92926186873429
AL1G54650	AT1G48090	OG0013842	.	protein_coding	calcium-dependent lipid-binding family protein	.	calcium-dependent lipid-binding family protein%3B FUNCTIONS IN: phosphoinositide binding%3B INVOLVED IN: signal transduction%3B LOCATED IN: chloroplast%3B EXPRESSED IN: 26 plant structures%3B EXPRESSED DURING: 15 growth stages%3B CONTAINS InterPro DOMAIN/s: C2 membrane targeting protein (InterPro:IPR018029)%2C Protein of unknown function DUF946 (InterPro:IPR009291)%2C Vacuolar protein sorting-ass…	.	calcium-dependent lipid-binding family protein%3B FUNCTIONS IN: phosphoinositide binding%3B INVOLVED IN: signal transduction%3B LOCATED IN: chloroplast%3B EXPRESSED IN: 26 plant structures%3B EXPRESSED DURING: 15 growth stages%3B CONTAINS InterPro DOMAIN/s: C2 membrane targeting protein (InterPro:IPR018029)%2C Protein of unknown function DUF946 (InterPro:IPR009291)%2C Vacuolar protein sorting-ass…	scaffold_1	24376064	24402548	26485	-	scaffold_1	24393992	24394258	267	*	0.237795835830657	-0.172681338504631	243.71768183101	0.442946428571429	4.12037020527934	0.00129979298925	15.7952	-0.2601786	0.39375	0.143280423	0.30733871	0.188571429	0.44875	NO	NO	NO	0.0357142857142857	0.125	B	B	-0.279702248880979	0.308675384857119	0.784161104950113	-4.14510076378418	1.49163898055451	2.04206656820543	0.827969027160435	-4.16648163075369	-0.588377633738098	4.92926186873429
AL1G54650	AT1G48090	OG0013842	.	protein_coding	calcium-dependent lipid-binding family protein	.	calcium-dependent lipid-binding family protein%3B FUNCTIONS IN: phosphoinositide binding%3B INVOLVED IN: signal transduction%3B LOCATED IN: chloroplast%3B EXPRESSED IN: 26 plant structures%3B EXPRESSED DURING: 15 growth stages%3B CONTAINS InterPro DOMAIN/s: C2 membrane targeting protein (InterPro:IPR018029)%2C Protein of unknown function DUF946 (InterPro:IPR009291)%2C Vacuolar protein sorting-ass…	.	calcium-dependent lipid-binding family protein%3B FUNCTIONS IN: phosphoinositide binding%3B INVOLVED IN: signal transduction%3B LOCATED IN: chloroplast%3B EXPRESSED IN: 26 plant structures%3B EXPRESSED DURING: 15 growth stages%3B CONTAINS InterPro DOMAIN/s: C2 membrane targeting protein (InterPro:IPR018029)%2C Protein of unknown function DUF946 (InterPro:IPR009291)%2C Vacuolar protein sorting-ass…	scaffold_1	24376064	24402548	26485	-	scaffold_1	24398825	24399432	608	*	0.208336845106627	-0.0704427164484166	218.442182969973	0.424017857142857	2.94643740474084	0.00388141334479	18.0058	-0.2728571	0.3725	0.250899471	0.211451613	0.247142857	0.52	NO	NO	NO	0.0357142857142857	0.125	B	B	-0.817293825309746	1.91701712733112	1.24709958859536	-4.03966982066249	0.954047404125741	3.65040831067943	1.29090751080568	-4.061050687632	-2.73431095264087	5.28676940925785
AL1G54650	AT1G48090	OG0013842	.	protein_coding	calcium-dependent lipid-binding family protein	.	calcium-dependent lipid-binding family protein%3B FUNCTIONS IN: phosphoinositide binding%3B INVOLVED IN: signal transduction%3B LOCATED IN: chloroplast%3B EXPRESSED IN: 26 plant structures%3B EXPRESSED DURING: 15 growth stages%3B CONTAINS InterPro DOMAIN/s: C2 membrane targeting protein (InterPro:IPR018029)%2C Protein of unknown function DUF946 (InterPro:IPR009291)%2C Vacuolar protein sorting-ass…	.	calcium-dependent lipid-binding family protein%3B FUNCTIONS IN: phosphoinositide binding%3B INVOLVED IN: signal transduction%3B LOCATED IN: chloroplast%3B EXPRESSED IN: 26 plant structures%3B EXPRESSED DURING: 15 growth stages%3B CONTAINS InterPro DOMAIN/s: C2 membrane targeting protein (InterPro:IPR018029)%2C Protein of unknown function DUF946 (InterPro:IPR009291)%2C Vacuolar protein sorting-ass…	scaffold_1	24376064	24402548	26485	-	scaffold_1	24397117	24397509	393	*	0.159822358104095	-0.0309031300184515	216.617507016903	0.433035714285714	2.58626334396926	0.0290341256746	12.6442	-0.3239286	0.33357143	0.273015873	0.316774194	0.188571429	0.5125	NO	NO	NO	0.0357142857142857	0.125	A	B	-0.035158712234806	1.12489375978306	1.04082427785548	-4.23665921438986	1.73618251720068	2.85828494313137	1.0846322000658	-4.25804008135937	-1.16005247201787	5.27748349224534
AL1G54650	AT1G48090	OG0013842	.	protein_coding	calcium-dependent lipid-binding family protein	.	calcium-dependent lipid-binding family protein%3B FUNCTIONS IN: phosphoinositide binding%3B INVOLVED IN: signal transduction%3B LOCATED IN: chloroplast%3B EXPRESSED IN: 26 plant structures%3B EXPRESSED DURING: 15 growth stages%3B CONTAINS InterPro DOMAIN/s: C2 membrane targeting protein (InterPro:IPR018029)%2C Protein of unknown function DUF946 (InterPro:IPR009291)%2C Vacuolar protein sorting-ass…	.	calcium-dependent lipid-binding family protein%3B FUNCTIONS IN: phosphoinositide binding%3B INVOLVED IN: signal transduction%3B LOCATED IN: chloroplast%3B EXPRESSED IN: 26 plant structures%3B EXPRESSED DURING: 15 growth stages%3B CONTAINS InterPro DOMAIN/s: C2 membrane targeting protein (InterPro:IPR018029)%2C Protein of unknown function DUF946 (InterPro:IPR009291)%2C Vacuolar protein sorting-ass…	scaffold_1	24376064	24402548	26485	-	scaffold_1	24399690	24400092	403	*	0.20366926068986	-0.0940113018059063	218.424067793463	0.416517857142857	2.82900624629495	0.0154629377514	22.3622	-0.2671429	0.36464286	0.217989418	0.252096774	0.142857143	0.41	NO	NO	NO	0.0357142857142857	0.125	B	B	-0.113978529831502	-0.451823285507457	1.17781627811785	-2.87021870156274	1.65736269960398	1.28156789784085	1.22162420032817	-2.89159956853225	0.337844755675955	4.04803497968059
AL1G54650	AT1G48090	OG0013842	.	protein_coding	calcium-dependent lipid-binding family protein	.	calcium-dependent lipid-binding family protein%3B FUNCTIONS IN: phosphoinositide binding%3B INVOLVED IN: signal transduction%3B LOCATED IN: chloroplast%3B EXPRESSED IN: 26 plant structures%3B EXPRESSED DURING: 15 growth stages%3B CONTAINS InterPro DOMAIN/s: C2 membrane targeting protein (InterPro:IPR018029)%2C Protein of unknown function DUF946 (InterPro:IPR009291)%2C Vacuolar protein sorting-ass…	.	calcium-dependent lipid-binding family protein%3B FUNCTIONS IN: phosphoinositide binding%3B INVOLVED IN: signal transduction%3B LOCATED IN: chloroplast%3B EXPRESSED IN: 26 plant structures%3B EXPRESSED DURING: 15 growth stages%3B CONTAINS InterPro DOMAIN/s: C2 membrane targeting protein (InterPro:IPR018029)%2C Protein of unknown function DUF946 (InterPro:IPR009291)%2C Vacuolar protein sorting-ass…	scaffold_1	24376064	24402548	26485	-	scaffold_1	24399449	24399670	222	*	0.199318578085414	-0.102394553209485	222.252421025171	0.430535714285714	2.71640177189235	0.00174139855141	25.1952	-0.3425	0.35928571	0.204656085	0.303548387	0.16	0.5025	NO	NO	NO	0.0357142857142857	0.125	A	B	-1.01939592171153	0.194224099812163	1.08963751932828	-3.18512428167619	0.751945307723957	1.92761528316047	1.1334454415386	-3.2065051486457	-1.21362002152369	4.27476180100447
AL1G54650	AT1G48090	OG0013842	.	protein_coding	calcium-dependent lipid-binding family protein	.	calcium-dependent lipid-binding family protein%3B FUNCTIONS IN: phosphoinositide binding%3B INVOLVED IN: signal transduction%3B LOCATED IN: chloroplast%3B EXPRESSED IN: 26 plant structures%3B EXPRESSED DURING: 15 growth stages%3B CONTAINS InterPro DOMAIN/s: C2 membrane targeting protein (InterPro:IPR018029)%2C Protein of unknown function DUF946 (InterPro:IPR009291)%2C Vacuolar protein sorting-ass…	.	calcium-dependent lipid-binding family protein%3B FUNCTIONS IN: phosphoinositide binding%3B INVOLVED IN: signal transduction%3B LOCATED IN: chloroplast%3B EXPRESSED IN: 26 plant structures%3B EXPRESSED DURING: 15 growth stages%3B CONTAINS InterPro DOMAIN/s: C2 membrane targeting protein (InterPro:IPR018029)%2C Protein of unknown function DUF946 (InterPro:IPR009291)%2C Vacuolar protein sorting-ass…	scaffold_1	24376064	24402548	26485	-	scaffold_1	24391158	24391513	356	*	0.217411292400106	-0.0727998402322036	252.071261794553	0.471428571428571	2.86837630445	0.0124919789166	13.7172	-0.2448214	0.39089286	0.25978836	0.283306452	0.221428571	0.46625	NO	NO	NO	0.0357142857142857	0.125	B	B	0.0658923359660852	0.329758516312779	0.0614102070141639	-3.06027184903209	1.83723356540157	2.06314969966109	0.105218129224486	-3.0816527160016	-0.263866180346694	3.12168205604625
AL1G54650	AT1G48090	OG0013842	.	protein_coding	calcium-dependent lipid-binding family protein	.	calcium-dependent lipid-binding family protein%3B FUNCTIONS IN: phosphoinositide binding%3B INVOLVED IN: signal transduction%3B LOCATED IN: chloroplast%3B EXPRESSED IN: 26 plant structures%3B EXPRESSED DURING: 15 growth stages%3B CONTAINS InterPro DOMAIN/s: C2 membrane targeting protein (InterPro:IPR018029)%2C Protein of unknown function DUF946 (InterPro:IPR009291)%2C Vacuolar protein sorting-ass…	.	calcium-dependent lipid-binding family protein%3B FUNCTIONS IN: phosphoinositide binding%3B INVOLVED IN: signal transduction%3B LOCATED IN: chloroplast%3B EXPRESSED IN: 26 plant structures%3B EXPRESSED DURING: 15 growth stages%3B CONTAINS InterPro DOMAIN/s: C2 membrane targeting protein (InterPro:IPR018029)%2C Protein of unknown function DUF946 (InterPro:IPR009291)%2C Vacuolar protein sorting-ass…	scaffold_1	24376064	24402548	26485	-	scaffold_1	24399449	24399670	222	*	0.199318578085414	-0.102394553209485	222.252421025171	0.430535714285714	2.71640177189235	0.00174139855141	25.1952	-0.3425	0.35928571	0.204656085	0.303548387	0.16	0.5025	NO	NO	NO	0.0357142857142857	0.125	B	B	-1.01939592171153	0.194224099812163	1.08963751932828	-3.18512428167619	0.751945307723957	1.92761528316047	1.1334454415386	-3.2065051486457	-1.21362002152369	4.27476180100447
AL1G54650	AT1G48090	OG0013842	.	protein_coding	calcium-dependent lipid-binding family protein	.	calcium-dependent lipid-binding family protein%3B FUNCTIONS IN: phosphoinositide binding%3B INVOLVED IN: signal transduction%3B LOCATED IN: chloroplast%3B EXPRESSED IN: 26 plant structures%3B EXPRESSED DURING: 15 growth stages%3B CONTAINS InterPro DOMAIN/s: C2 membrane targeting protein (InterPro:IPR018029)%2C Protein of unknown function DUF946 (InterPro:IPR009291)%2C Vacuolar protein sorting-ass…	.	calcium-dependent lipid-binding family protein%3B FUNCTIONS IN: phosphoinositide binding%3B INVOLVED IN: signal transduction%3B LOCATED IN: chloroplast%3B EXPRESSED IN: 26 plant structures%3B EXPRESSED DURING: 15 growth stages%3B CONTAINS InterPro DOMAIN/s: C2 membrane targeting protein (InterPro:IPR018029)%2C Protein of unknown function DUF946 (InterPro:IPR009291)%2C Vacuolar protein sorting-ass…	scaffold_1	24376064	24402548	26485	-	scaffold_1	24400925	24401332	408	*	0.199661550959088	-0.051267305117028	251.630866604345	0.492232142857143	3.28167212688612	0.00620310566931	32.2374	-0.3460714	0.40321429	0.293121693	0.304193548	0.231428571	0.5775	NO	NO	NO	0.0357142857142857	0.125	B	B	-1.07598450870403	0.718290510281211	0.472386207801278	-3.54580908709249	0.695356720731456	2.45168169362952	0.5161941300116	-3.567189954062	-1.79427501898524	4.01819529489377
AL1G57600	AT1G50030	OG0012637	TOR	protein_coding	target of rapamycin	target of rapamycin	target of rapamycin (TOR)%3B FUNCTIONS IN: protein binding%2C 1-phosphatidylinositol-3-kinase activity%3B INVOLVED IN: embryo development ending in seed dormancy%3B LOCATED IN: chloroplast%3B EXPRESSED IN: 28 plant structures%3B EXPRESSED DURING: 15 growth stages%3B CONTAINS InterPro DOMAIN/s: Phosphatidylinositol 3-/4-kinase%2C catalytic (InterPro:IPR000403)%2C Armadillo-like helical (InterPro:I…	Related to TOR proteins from yeast and mammals%2C regulators of cell growth in response to nutrient availability. TOR proteins belong to the family of phosphatidylinositol 3-kinase and are targets of the antiproliferative drug rapamycin. AtTOR binds the yeast FKBP12 protein in the presence of Rapamycin%2C is involved in embryogenesis and is expressed in embryos%2C endosperm and meristems.	target of rapamycin (TOR)%3B FUNCTIONS IN: protein binding%2C 1-phosphatidylinositol-3-kinase activity%3B INVOLVED IN: embryo development ending in seed dormancy%3B LOCATED IN: chloroplast%3B EXPRESSED IN: 28 plant structures%3B EXPRESSED DURING: 15 growth stages%3B CONTAINS InterPro DOMAIN/s: Phosphatidylinositol 3-/4-kinase%2C catalytic (InterPro:IPR000403)%2C Armadillo-like helical (InterPro:I…	scaffold_1	26016816	26034458	17643	-	scaffold_1	26029917	26030659	743	*	0.245854742619977	0.0820710927470566	211.780471382911	0.339642857142857	3.44941233472855	0.00888440274046	12.3173	-0.2846429	0.33178571	0.405714286	0.014032258	0.442857143	0.7275	NO	NO	NO	NO	NO	C	B	2.84075411956272	-3.11733347668625	-0.796758070491483	0.578482937917671	4.61209534899821	-1.38394229333794	-0.752950148281161	0.557102070948164	5.95808759624897	-1.37524100840915
AL1G64090	AT1G55930	OG0022367	.	protein_coding	CBS domain-containing protein / transporter associated domain-containing protein	.	CBS domain-containing protein / transporter associated domain-containing protein%3B FUNCTIONS IN: molecular_function unknown%3B INVOLVED IN: biological_process unknown%3B LOCATED IN: chloroplast%3B EXPRESSED IN: 23 plant structures%3B EXPRESSED DURING: 13 growth stages%3B CONTAINS InterPro DOMAIN/s: Protein of unknown function DUF21 (InterPro:IPR002550)%2C Transporter-associated domain (InterPro:…	.	CBS domain-containing protein / transporter associated domain-containing protein%3B FUNCTIONS IN: molecular_function unknown%3B INVOLVED IN: biological_process unknown%3B LOCATED IN: chloroplast%3B EXPRESSED IN: 23 plant structures%3B EXPRESSED DURING: 13 growth stages%3B CONTAINS InterPro DOMAIN/s: Protein of unknown function DUF21 (InterPro:IPR002550)%2C Transporter-associated domain (InterPro:…	scaffold_1	29582561	29586131	3571	+	scaffold_1	29581105	29582728	1624	*	0.237687756946934	-0.0869240155220585	196.968283173441	0.353482142857143	3.6747690022508	0.00373213815884	6.3945	0.2060714	0.33142857	0.205291005	0.132258065	0.368571429	0.1625	NO	NO	NO	NO	NO	B	B	-1.4660415547595	-1.34635043441152	-1.96985048653132	-1.87417373891312	0.305299674675986	0.387040748936786	-1.926042564321	-1.89555460588263	-0.11969112034798	-0.0956767476182001
AL1G64090	AT1G55930	OG0022367	.	protein_coding	CBS domain-containing protein / transporter associated domain-containing protein	.	CBS domain-containing protein / transporter associated domain-containing protein%3B FUNCTIONS IN: molecular_function unknown%3B INVOLVED IN: biological_process unknown%3B LOCATED IN: chloroplast%3B EXPRESSED IN: 23 plant structures%3B EXPRESSED DURING: 13 growth stages%3B CONTAINS InterPro DOMAIN/s: Protein of unknown function DUF21 (InterPro:IPR002550)%2C Transporter-associated domain (InterPro:…	.	CBS domain-containing protein / transporter associated domain-containing protein%3B FUNCTIONS IN: molecular_function unknown%3B INVOLVED IN: biological_process unknown%3B LOCATED IN: chloroplast%3B EXPRESSED IN: 23 plant structures%3B EXPRESSED DURING: 13 growth stages%3B CONTAINS InterPro DOMAIN/s: Protein of unknown function DUF21 (InterPro:IPR002550)%2C Transporter-associated domain (InterPro:…	scaffold_1	29582561	29586131	3571	+	scaffold_1	29581105	29582728	1624	*	0.237687756946934	-0.0869240155220585	196.968283173441	0.353482142857143	3.6747690022508	0.00373213815884	6.3945	0.2060714	0.33142857	0.205291005	0.132258065	0.368571429	0.1625	NO	NO	NO	NO	NO	C	B	-1.4660415547595	-1.34635043441152	-1.96985048653132	-1.87417373891312	0.305299674675986	0.387040748936786	-1.926042564321	-1.89555460588263	-0.11969112034798	-0.0956767476182001
AL1G64090	AT1G55930	OG0022367	.	protein_coding	CBS domain-containing protein / transporter associated domain-containing protein	.	CBS domain-containing protein / transporter associated domain-containing protein%3B FUNCTIONS IN: molecular_function unknown%3B INVOLVED IN: biological_process unknown%3B LOCATED IN: chloroplast%3B EXPRESSED IN: 23 plant structures%3B EXPRESSED DURING: 13 growth stages%3B CONTAINS InterPro DOMAIN/s: Protein of unknown function DUF21 (InterPro:IPR002550)%2C Transporter-associated domain (InterPro:…	.	CBS domain-containing protein / transporter associated domain-containing protein%3B FUNCTIONS IN: molecular_function unknown%3B INVOLVED IN: biological_process unknown%3B LOCATED IN: chloroplast%3B EXPRESSED IN: 23 plant structures%3B EXPRESSED DURING: 13 growth stages%3B CONTAINS InterPro DOMAIN/s: Protein of unknown function DUF21 (InterPro:IPR002550)%2C Transporter-associated domain (InterPro:…	scaffold_1	29582561	29586131	3571	+	scaffold_1	29582736	29582944	209	*	0.21015587739111	-0.154452783990058	189.787698317258	0.331071428571429	4.15315824138228	3.47844308701E-4	3.7212	0.05071429	0.31142857	0.112592593	0.238387097	0.345714286	0.295	NO	NO	NO	NO	NO	B	B	-2.03596946661256	-0.25605135056212	-0.429871449099162	0.639521904988117	-0.264628237177073	1.47733983278619	-0.38606352688884	0.61814103801861	-1.77991811605044	-1.06939335408728
AL1G64190	AT1G55940	OG0003389	CYP708A1	protein_coding	cytochrome P450 family protein	cytochrome P450%2C family 708%2C subfamily A%2C polypeptide 1	cytochrome P450%2C family 708%2C subfamily A%2C polypeptide 1 (CYP708A1)%3B FUNCTIONS IN: electron carrier activity%2C monooxygenase activity%2C iron ion binding%2C oxygen binding%2C heme binding%3B INVOLVED IN: biological_process unknown%3B LOCATED IN: cellular_component unknown%3B EXPRESSED IN: shoot apex%2C shoot%2C hypocotyl%2C root%2C leaf%3B EXPRESSED DURING: LP.12 twelve leaves visible%3B …	member of CYP708A	cytochrome P450%2C family 708%2C subfamily A%2C polypeptide 1 (CYP708A1)%3B FUNCTIONS IN: electron carrier activity%2C monooxygenase activity%2C iron ion binding%2C oxygen binding%2C heme binding%3B INVOLVED IN: biological_process unknown%3B LOCATED IN: cellular_component unknown%3B EXPRESSED IN: shoot apex%2C shoot%2C hypocotyl%2C root%2C leaf%3B EXPRESSED DURING: LP.12 twelve leaves visible%3B …	scaffold_1	29619333	29621536	2204	-	scaffold_1	29620756	29621171	416	*	0.486446335849825	-0.19643490432643	319.892864179698	0.612678571428571	7.65199842453159	3.47844308701E-4	22.5978	0.19125	0.60267857	0.247830688	0.081209677	0.44	0.24875	NO	MODERATE	NO	0	0.28125	A	B	-2.05213763432469	-1.73337649041884	-1.72106041708931	0.898937515037532	-0.280796404889204	1.4692929466209E-5	-1.67725249487899	0.877556648068025	-0.31876114390585	-2.61999793212684
AL1G64190	AT1G55940	OG0003389	CYP708A1	protein_coding	cytochrome P450 family protein	cytochrome P450%2C family 708%2C subfamily A%2C polypeptide 1	cytochrome P450%2C family 708%2C subfamily A%2C polypeptide 1 (CYP708A1)%3B FUNCTIONS IN: electron carrier activity%2C monooxygenase activity%2C iron ion binding%2C oxygen binding%2C heme binding%3B INVOLVED IN: biological_process unknown%3B LOCATED IN: cellular_component unknown%3B EXPRESSED IN: shoot apex%2C shoot%2C hypocotyl%2C root%2C leaf%3B EXPRESSED DURING: LP.12 twelve leaves visible%3B …	member of CYP708A	cytochrome P450%2C family 708%2C subfamily A%2C polypeptide 1 (CYP708A1)%3B FUNCTIONS IN: electron carrier activity%2C monooxygenase activity%2C iron ion binding%2C oxygen binding%2C heme binding%3B INVOLVED IN: biological_process unknown%3B LOCATED IN: cellular_component unknown%3B EXPRESSED IN: shoot apex%2C shoot%2C hypocotyl%2C root%2C leaf%3B EXPRESSED DURING: LP.12 twelve leaves visible%3B …	scaffold_1	29619333	29621536	2204	-	scaffold_1	29620457	29620723	267	*	0.204099654912031	-0.144179736484472	197.467542246713	0.345089285714286	4.52170574739796	0.00129979298925	16.2262	0.0675	0.30892857	0.123174603	0.265322581	0.32	0.2525	NO	NO	NO	0	0.28125	B	A	-0.833461993021892	-0.721386180547559	-3.48306097218807	0.321841826371465	0.937879236413595	1.01200500280075	-3.43925304997775	0.300460959401958	-0.112075812474333	-3.80490279855954
AL1G64190	AT1G55940	OG0003389	CYP708A1	protein_coding	cytochrome P450 family protein	cytochrome P450%2C family 708%2C subfamily A%2C polypeptide 1	cytochrome P450%2C family 708%2C subfamily A%2C polypeptide 1 (CYP708A1)%3B FUNCTIONS IN: electron carrier activity%2C monooxygenase activity%2C iron ion binding%2C oxygen binding%2C heme binding%3B INVOLVED IN: biological_process unknown%3B LOCATED IN: cellular_component unknown%3B EXPRESSED IN: shoot apex%2C shoot%2C hypocotyl%2C root%2C leaf%3B EXPRESSED DURING: LP.12 twelve leaves visible%3B …	member of CYP708A	cytochrome P450%2C family 708%2C subfamily A%2C polypeptide 1 (CYP708A1)%3B FUNCTIONS IN: electron carrier activity%2C monooxygenase activity%2C iron ion binding%2C oxygen binding%2C heme binding%3B INVOLVED IN: biological_process unknown%3B LOCATED IN: cellular_component unknown%3B EXPRESSED IN: shoot apex%2C shoot%2C hypocotyl%2C root%2C leaf%3B EXPRESSED DURING: LP.12 twelve leaves visible%3B …	scaffold_1	29619333	29621536	2204	-	scaffold_1	29620756	29621171	416	*	0.486446335849825	-0.19643490432643	319.892864179698	0.612678571428571	7.65199842453159	3.47844308701E-4	22.5978	0.19125	0.60267857	0.247830688	0.081209677	0.44	0.24875	NO	NO	NO	0	0.28125	B	A	-2.05213763432469	-1.73337649041884	-1.72106041708931	0.898937515037532	-0.280796404889204	1.4692929466209E-5	-1.67725249487899	0.877556648068025	-0.31876114390585	-2.61999793212684
AL1G64190	AT1G55940	OG0003389	CYP708A1	protein_coding	cytochrome P450 family protein	cytochrome P450%2C family 708%2C subfamily A%2C polypeptide 1	cytochrome P450%2C family 708%2C subfamily A%2C polypeptide 1 (CYP708A1)%3B FUNCTIONS IN: electron carrier activity%2C monooxygenase activity%2C iron ion binding%2C oxygen binding%2C heme binding%3B INVOLVED IN: biological_process unknown%3B LOCATED IN: cellular_component unknown%3B EXPRESSED IN: shoot apex%2C shoot%2C hypocotyl%2C root%2C leaf%3B EXPRESSED DURING: LP.12 twelve leaves visible%3B …	member of CYP708A	cytochrome P450%2C family 708%2C subfamily A%2C polypeptide 1 (CYP708A1)%3B FUNCTIONS IN: electron carrier activity%2C monooxygenase activity%2C iron ion binding%2C oxygen binding%2C heme binding%3B INVOLVED IN: biological_process unknown%3B LOCATED IN: cellular_component unknown%3B EXPRESSED IN: shoot apex%2C shoot%2C hypocotyl%2C root%2C leaf%3B EXPRESSED DURING: LP.12 twelve leaves visible%3B …	scaffold_1	29619333	29621536	2204	-	scaffold_1	29621176	29621652	477	*	0.218130599615516	-0.147849678891229	195.331982893381	0.352232142857143	4.55138407841975	0.00129979298925	17.6448	0.06946429	0.31660714	0.123703704	0.270725806	0.275714286	0.20625	NO	NO	NO	0	0.28125	B	A	-3.02626973898134	0.552637334558243	-2.30367007337755	0.34126331589388	-1.25492850954585	2.28602851790655	-2.25986215116723	0.319882448924373	-3.57890707353958	-2.64493338927143
AL1G64190	AT1G55940	OG0003389	CYP708A1	protein_coding	cytochrome P450 family protein	cytochrome P450%2C family 708%2C subfamily A%2C polypeptide 1	cytochrome P450%2C family 708%2C subfamily A%2C polypeptide 1 (CYP708A1)%3B FUNCTIONS IN: electron carrier activity%2C monooxygenase activity%2C iron ion binding%2C oxygen binding%2C heme binding%3B INVOLVED IN: biological_process unknown%3B LOCATED IN: cellular_component unknown%3B EXPRESSED IN: shoot apex%2C shoot%2C hypocotyl%2C root%2C leaf%3B EXPRESSED DURING: LP.12 twelve leaves visible%3B …	member of CYP708A	cytochrome P450%2C family 708%2C subfamily A%2C polypeptide 1 (CYP708A1)%3B FUNCTIONS IN: electron carrier activity%2C monooxygenase activity%2C iron ion binding%2C oxygen binding%2C heme binding%3B INVOLVED IN: biological_process unknown%3B LOCATED IN: cellular_component unknown%3B EXPRESSED IN: shoot apex%2C shoot%2C hypocotyl%2C root%2C leaf%3B EXPRESSED DURING: LP.12 twelve leaves visible%3B …	scaffold_1	29619333	29621536	2204	-	scaffold_1	29621658	29622139	482	*	0.225340555758669	-0.206073558188015	201.800671753891	0.342678571428571	5.30548221235952	0.00175352917109	17.0857	-0.1842857	0.32607143	0.060740741	0.301774194	0.105714286	0.29	NO	NO	NO	0	0.28125	B	A	-3.78011055856003	1.56914545831286	0.393655173167729	0.3676210516743	-2.00876932912454	3.30253664166117	0.437463095378051	0.346240184704793	-5.34925601687289	0.026034121493429
AL1G64190	AT1G55940	OG0003389	CYP708A1	protein_coding	cytochrome P450 family protein	cytochrome P450%2C family 708%2C subfamily A%2C polypeptide 1	cytochrome P450%2C family 708%2C subfamily A%2C polypeptide 1 (CYP708A1)%3B FUNCTIONS IN: electron carrier activity%2C monooxygenase activity%2C iron ion binding%2C oxygen binding%2C heme binding%3B INVOLVED IN: biological_process unknown%3B LOCATED IN: cellular_component unknown%3B EXPRESSED IN: shoot apex%2C shoot%2C hypocotyl%2C root%2C leaf%3B EXPRESSED DURING: LP.12 twelve leaves visible%3B …	member of CYP708A	cytochrome P450%2C family 708%2C subfamily A%2C polypeptide 1 (CYP708A1)%3B FUNCTIONS IN: electron carrier activity%2C monooxygenase activity%2C iron ion binding%2C oxygen binding%2C heme binding%3B INVOLVED IN: biological_process unknown%3B LOCATED IN: cellular_component unknown%3B EXPRESSED IN: shoot apex%2C shoot%2C hypocotyl%2C root%2C leaf%3B EXPRESSED DURING: LP.12 twelve leaves visible%3B …	scaffold_1	29619333	29621536	2204	-	scaffold_1	29620756	29621171	416	*	0.486446335849825	-0.19643490432643	319.892864179698	0.612678571428571	7.65199842453159	3.47844308701E-4	22.5978	0.19125	0.60267857	0.247830688	0.081209677	0.44	0.24875	NO	NO	NO	0	0.28125	B	A	-2.05213763432469	-1.73337649041884	-1.72106041708931	0.898937515037532	-0.280796404889204	1.4692929466209E-5	-1.67725249487899	0.877556648068025	-0.31876114390585	-2.61999793212684
AL1G64190	AT1G55940	OG0003389	CYP708A1	protein_coding	cytochrome P450 family protein	cytochrome P450%2C family 708%2C subfamily A%2C polypeptide 1	cytochrome P450%2C family 708%2C subfamily A%2C polypeptide 1 (CYP708A1)%3B FUNCTIONS IN: electron carrier activity%2C monooxygenase activity%2C iron ion binding%2C oxygen binding%2C heme binding%3B INVOLVED IN: biological_process unknown%3B LOCATED IN: cellular_component unknown%3B EXPRESSED IN: shoot apex%2C shoot%2C hypocotyl%2C root%2C leaf%3B EXPRESSED DURING: LP.12 twelve leaves visible%3B …	member of CYP708A	cytochrome P450%2C family 708%2C subfamily A%2C polypeptide 1 (CYP708A1)%3B FUNCTIONS IN: electron carrier activity%2C monooxygenase activity%2C iron ion binding%2C oxygen binding%2C heme binding%3B INVOLVED IN: biological_process unknown%3B LOCATED IN: cellular_component unknown%3B EXPRESSED IN: shoot apex%2C shoot%2C hypocotyl%2C root%2C leaf%3B EXPRESSED DURING: LP.12 twelve leaves visible%3B …	scaffold_1	29619333	29621536	2204	-	scaffold_1	29620756	29621171	416	*	0.486446335849825	-0.19643490432643	319.892864179698	0.612678571428571	7.65199842453159	3.47844308701E-4	22.5978	0.19125	0.60267857	0.247830688	0.081209677	0.44	0.24875	NO	NO	NO	0	0.28125	B	A	-2.05213763432469	-1.73337649041884	-1.72106041708931	0.898937515037532	-0.280796404889204	1.4692929466209E-5	-1.67725249487899	0.877556648068025	-0.31876114390585	-2.61999793212684
AL1G64190	AT1G55940	OG0003389	CYP708A1	protein_coding	cytochrome P450 family protein	cytochrome P450%2C family 708%2C subfamily A%2C polypeptide 1	cytochrome P450%2C family 708%2C subfamily A%2C polypeptide 1 (CYP708A1)%3B FUNCTIONS IN: electron carrier activity%2C monooxygenase activity%2C iron ion binding%2C oxygen binding%2C heme binding%3B INVOLVED IN: biological_process unknown%3B LOCATED IN: cellular_component unknown%3B EXPRESSED IN: shoot apex%2C shoot%2C hypocotyl%2C root%2C leaf%3B EXPRESSED DURING: LP.12 twelve leaves visible%3B …	member of CYP708A	cytochrome P450%2C family 708%2C subfamily A%2C polypeptide 1 (CYP708A1)%3B FUNCTIONS IN: electron carrier activity%2C monooxygenase activity%2C iron ion binding%2C oxygen binding%2C heme binding%3B INVOLVED IN: biological_process unknown%3B LOCATED IN: cellular_component unknown%3B EXPRESSED IN: shoot apex%2C shoot%2C hypocotyl%2C root%2C leaf%3B EXPRESSED DURING: LP.12 twelve leaves visible%3B …	scaffold_1	29619333	29621536	2204	-	scaffold_1	29621658	29622139	482	*	0.225340555758669	-0.206073558188015	201.800671753891	0.342678571428571	5.30548221235952	0.00175352917109	17.0857	-0.1842857	0.32607143	0.060740741	0.301774194	0.105714286	0.29	NO	NO	NO	0	0.28125	B	A	-3.78011055856003	1.56914545831286	0.393655173167729	0.3676210516743	-2.00876932912454	3.30253664166117	0.437463095378051	0.346240184704793	-5.34925601687289	0.026034121493429
AL1G64230	AT1G55970	OG0022383	HAC4	protein_coding	histone acetyltransferase of the CBP family 4	histone acetyltransferase of the CBP family 4	histone acetyltransferase of the CBP family 4 (HAC4)%3B FUNCTIONS IN: histone acetyltransferase activity%3B INVOLVED IN: regulation of transcription%2C D-dependent%3B LOCATED IN: nucleus%2C chloroplast%3B EXPRESSED IN: 23 plant structures%3B EXPRESSED DURING: 13 growth stages%3B CONTAINS InterPro DOMAIN/s: Zinc finger%2C PHD-type%2C conserved site (InterPro:IPR019786)%2C Zinc finger%2C TAZ-type (…	HAC4 is most likely to be an expressed pseudogene that lacks HAT function. there is a single nucleotide deletion in both the HAC4 genomic and cD sequences relative to its homologs. The resulting frameshift within the open reading frame causes a stop codon to occur within the predicted acetyltransferase catalytic domain.	histone acetyltransferase of the CBP family 4 (HAC4)%3B FUNCTIONS IN: histone acetyltransferase activity%3B INVOLVED IN: regulation of transcription%2C D-dependent%3B LOCATED IN: nucleus%2C chloroplast%3B EXPRESSED IN: 23 plant structures%3B EXPRESSED DURING: 13 growth stages%3B CONTAINS InterPro DOMAIN/s: Zinc finger%2C PHD-type%2C conserved site (InterPro:IPR019786)%2C Zinc finger%2C TAZ-type (…	scaffold_1	29631795	29638336	6542	-	scaffold_1	29631687	29632626	940	*	0.279712587559563	-0.162720182851916	174.21096498225	0.344910714285714	4.95710511375012	3.47844308701E-4	11.222	0.2176786	0.34267857	0.122645503	0.109435484	0.281428571	0.06375	NO	NO	NO	0	0.25	A	A	-2.62812860906981	0.204765665539984	-3.38228524785713	0.0430047267996351	-0.856787379634324	1.93815684888829	-3.33847732564681	0.0216238598301282	-2.83289427460979	-3.42528997465676
AL1G64230	AT1G55970	OG0022383	HAC4	protein_coding	histone acetyltransferase of the CBP family 4	histone acetyltransferase of the CBP family 4	histone acetyltransferase of the CBP family 4 (HAC4)%3B FUNCTIONS IN: histone acetyltransferase activity%3B INVOLVED IN: regulation of transcription%2C D-dependent%3B LOCATED IN: nucleus%2C chloroplast%3B EXPRESSED IN: 23 plant structures%3B EXPRESSED DURING: 13 growth stages%3B CONTAINS InterPro DOMAIN/s: Zinc finger%2C PHD-type%2C conserved site (InterPro:IPR019786)%2C Zinc finger%2C TAZ-type (…	HAC4 is most likely to be an expressed pseudogene that lacks HAT function. there is a single nucleotide deletion in both the HAC4 genomic and cD sequences relative to its homologs. The resulting frameshift within the open reading frame causes a stop codon to occur within the predicted acetyltransferase catalytic domain.	histone acetyltransferase of the CBP family 4 (HAC4)%3B FUNCTIONS IN: histone acetyltransferase activity%3B INVOLVED IN: regulation of transcription%2C D-dependent%3B LOCATED IN: nucleus%2C chloroplast%3B EXPRESSED IN: 23 plant structures%3B EXPRESSED DURING: 13 growth stages%3B CONTAINS InterPro DOMAIN/s: Zinc finger%2C PHD-type%2C conserved site (InterPro:IPR019786)%2C Zinc finger%2C TAZ-type (…	scaffold_1	29631795	29638336	6542	-	scaffold_1	29636761	29639721	2961	*	0.463446297433996	-0.185711913141727	316.269057125505	0.582232142857143	6.83791437640871	8.5826388779E-4	4.7018	0.4726786	0.57767857	0.244656085	0.072177419	0.531428571	0.05875	NO	NO	NO	0	0.25	A	A	-2.90702950210428	-0.859932472970418	-0.425147587021146	0.638134655736522	-1.13568827266879	0.873458710377888	-0.381339664810824	0.616753788767015	-2.04709702913386	-1.06328224275767
AL1G64230	AT1G55970	OG0022383	HAC4	protein_coding	histone acetyltransferase of the CBP family 4	histone acetyltransferase of the CBP family 4	histone acetyltransferase of the CBP family 4 (HAC4)%3B FUNCTIONS IN: histone acetyltransferase activity%3B INVOLVED IN: regulation of transcription%2C D-dependent%3B LOCATED IN: nucleus%2C chloroplast%3B EXPRESSED IN: 23 plant structures%3B EXPRESSED DURING: 13 growth stages%3B CONTAINS InterPro DOMAIN/s: Zinc finger%2C PHD-type%2C conserved site (InterPro:IPR019786)%2C Zinc finger%2C TAZ-type (…	HAC4 is most likely to be an expressed pseudogene that lacks HAT function. there is a single nucleotide deletion in both the HAC4 genomic and cD sequences relative to its homologs. The resulting frameshift within the open reading frame causes a stop codon to occur within the predicted acetyltransferase catalytic domain.	histone acetyltransferase of the CBP family 4 (HAC4)%3B FUNCTIONS IN: histone acetyltransferase activity%3B INVOLVED IN: regulation of transcription%2C D-dependent%3B LOCATED IN: nucleus%2C chloroplast%3B EXPRESSED IN: 23 plant structures%3B EXPRESSED DURING: 13 growth stages%3B CONTAINS InterPro DOMAIN/s: Zinc finger%2C PHD-type%2C conserved site (InterPro:IPR019786)%2C Zinc finger%2C TAZ-type (…	scaffold_1	29631795	29638336	6542	-	scaffold_1	29636411	29636754	344	*	0.485864261823474	-0.147956349727617	334.313672511289	0.610535714285714	7.29660265163316	0.00129979298925	14.4052	0.5858929	0.60839286	0.308888889	0.036048387	0.607142857	0.02125	NO	NO	NO	0	0.25	A	A	0.510516948050044	-4.03746157092933	-5.41197132070993	0.241381369778597	2.28185817748553	-2.30407038758102	-5.36816339849961	0.22000050280909	4.54797851897937	-5.65335269048853
AL1G64230	AT1G55970	OG0022383	HAC4	protein_coding	histone acetyltransferase of the CBP family 4	histone acetyltransferase of the CBP family 4	histone acetyltransferase of the CBP family 4 (HAC4)%3B FUNCTIONS IN: histone acetyltransferase activity%3B INVOLVED IN: regulation of transcription%2C D-dependent%3B LOCATED IN: nucleus%2C chloroplast%3B EXPRESSED IN: 23 plant structures%3B EXPRESSED DURING: 13 growth stages%3B CONTAINS InterPro DOMAIN/s: Zinc finger%2C PHD-type%2C conserved site (InterPro:IPR019786)%2C Zinc finger%2C TAZ-type (…	HAC4 is most likely to be an expressed pseudogene that lacks HAT function. there is a single nucleotide deletion in both the HAC4 genomic and cD sequences relative to its homologs. The resulting frameshift within the open reading frame causes a stop codon to occur within the predicted acetyltransferase catalytic domain.	histone acetyltransferase of the CBP family 4 (HAC4)%3B FUNCTIONS IN: histone acetyltransferase activity%3B INVOLVED IN: regulation of transcription%2C D-dependent%3B LOCATED IN: nucleus%2C chloroplast%3B EXPRESSED IN: 23 plant structures%3B EXPRESSED DURING: 13 growth stages%3B CONTAINS InterPro DOMAIN/s: Zinc finger%2C PHD-type%2C conserved site (InterPro:IPR019786)%2C Zinc finger%2C TAZ-type (…	scaffold_1	29631795	29638336	6542	-	scaffold_1	29636205	29636406	202	*	0.314180359425364	-0.0847195934624912	211.635633291126	0.396964285714286	4.36603676922756	0.00373213815884	10.2244	0.3716071	0.39696429	0.24952381	0.022016129	0.422857143	0.05125	NO	NO	NO	0	0.25	A	A	0.569126556006562	-3.94861123122337	-4.6829219400033	0.256641111546209	2.34046778544205	-2.21522004787506	-4.63911401779298	0.235260244576702	4.51773778722993	-4.93956305154951
AL1G64230	AT1G55970	OG0022383	HAC4	protein_coding	histone acetyltransferase of the CBP family 4	histone acetyltransferase of the CBP family 4	histone acetyltransferase of the CBP family 4 (HAC4)%3B FUNCTIONS IN: histone acetyltransferase activity%3B INVOLVED IN: regulation of transcription%2C D-dependent%3B LOCATED IN: nucleus%2C chloroplast%3B EXPRESSED IN: 23 plant structures%3B EXPRESSED DURING: 13 growth stages%3B CONTAINS InterPro DOMAIN/s: Zinc finger%2C PHD-type%2C conserved site (InterPro:IPR019786)%2C Zinc finger%2C TAZ-type (…	HAC4 is most likely to be an expressed pseudogene that lacks HAT function. there is a single nucleotide deletion in both the HAC4 genomic and cD sequences relative to its homologs. The resulting frameshift within the open reading frame causes a stop codon to occur within the predicted acetyltransferase catalytic domain.	histone acetyltransferase of the CBP family 4 (HAC4)%3B FUNCTIONS IN: histone acetyltransferase activity%3B INVOLVED IN: regulation of transcription%2C D-dependent%3B LOCATED IN: nucleus%2C chloroplast%3B EXPRESSED IN: 23 plant structures%3B EXPRESSED DURING: 13 growth stages%3B CONTAINS InterPro DOMAIN/s: Zinc finger%2C PHD-type%2C conserved site (InterPro:IPR019786)%2C Zinc finger%2C TAZ-type (…	scaffold_1	29631795	29638336	6542	-	scaffold_1	29635881	29636183	303	*	0.427375813102904	-0.182589444382391	258.040787732766	0.519375	6.27731314633248	0.00129979298925	13.7168	0.4533929	0.51803571	0.21047619	0.044758065	0.487142857	0.03375	NO	NO	NO	0	0.25	A	A	-0.415110653470179	-4.09769908937404	-2.03283531423816	0.230283375765788	1.35623057596531	-2.36430790602573	-1.98902739202784	0.208902508796281	3.68258843590386	-2.26311869000395
AL1G64230	AT1G55970	OG0022383	HAC4	protein_coding	histone acetyltransferase of the CBP family 4	histone acetyltransferase of the CBP family 4	histone acetyltransferase of the CBP family 4 (HAC4)%3B FUNCTIONS IN: histone acetyltransferase activity%3B INVOLVED IN: regulation of transcription%2C D-dependent%3B LOCATED IN: nucleus%2C chloroplast%3B EXPRESSED IN: 23 plant structures%3B EXPRESSED DURING: 13 growth stages%3B CONTAINS InterPro DOMAIN/s: Zinc finger%2C PHD-type%2C conserved site (InterPro:IPR019786)%2C Zinc finger%2C TAZ-type (…	HAC4 is most likely to be an expressed pseudogene that lacks HAT function. there is a single nucleotide deletion in both the HAC4 genomic and cD sequences relative to its homologs. The resulting frameshift within the open reading frame causes a stop codon to occur within the predicted acetyltransferase catalytic domain.	histone acetyltransferase of the CBP family 4 (HAC4)%3B FUNCTIONS IN: histone acetyltransferase activity%3B INVOLVED IN: regulation of transcription%2C D-dependent%3B LOCATED IN: nucleus%2C chloroplast%3B EXPRESSED IN: 23 plant structures%3B EXPRESSED DURING: 13 growth stages%3B CONTAINS InterPro DOMAIN/s: Zinc finger%2C PHD-type%2C conserved site (InterPro:IPR019786)%2C Zinc finger%2C TAZ-type (…	scaffold_1	29631795	29638336	6542	-	scaffold_1	29635881	29636183	303	*	0.427375813102904	-0.182589444382391	258.040787732766	0.519375	6.27731314633248	0.00129979298925	13.7168	0.4533929	0.51803571	0.21047619	0.044758065	0.487142857	0.03375	NO	MODERATE	NO	0	0.25	A	A	-0.415110653470179	-4.09769908937404	-2.03283531423816	0.230283375765788	1.35623057596531	-2.36430790602573	-1.98902739202784	0.208902508796281	3.68258843590386	-2.26311869000395
AL1G64230	AT1G55970	OG0022383	HAC4	protein_coding	histone acetyltransferase of the CBP family 4	histone acetyltransferase of the CBP family 4	histone acetyltransferase of the CBP family 4 (HAC4)%3B FUNCTIONS IN: histone acetyltransferase activity%3B INVOLVED IN: regulation of transcription%2C D-dependent%3B LOCATED IN: nucleus%2C chloroplast%3B EXPRESSED IN: 23 plant structures%3B EXPRESSED DURING: 13 growth stages%3B CONTAINS InterPro DOMAIN/s: Zinc finger%2C PHD-type%2C conserved site (InterPro:IPR019786)%2C Zinc finger%2C TAZ-type (…	HAC4 is most likely to be an expressed pseudogene that lacks HAT function. there is a single nucleotide deletion in both the HAC4 genomic and cD sequences relative to its homologs. The resulting frameshift within the open reading frame causes a stop codon to occur within the predicted acetyltransferase catalytic domain.	histone acetyltransferase of the CBP family 4 (HAC4)%3B FUNCTIONS IN: histone acetyltransferase activity%3B INVOLVED IN: regulation of transcription%2C D-dependent%3B LOCATED IN: nucleus%2C chloroplast%3B EXPRESSED IN: 23 plant structures%3B EXPRESSED DURING: 13 growth stages%3B CONTAINS InterPro DOMAIN/s: Zinc finger%2C PHD-type%2C conserved site (InterPro:IPR019786)%2C Zinc finger%2C TAZ-type (…	scaffold_1	29631795	29638336	6542	-	scaffold_1	29636761	29639721	2961	*	0.463446297433996	-0.185711913141727	316.269057125505	0.582232142857143	6.83791437640871	8.5826388779E-4	4.7018	0.4726786	0.57767857	0.244656085	0.072177419	0.531428571	0.05875	NO	NO	NO	0	0.25	A	A	-2.90702950210428	-0.859932472970418	-0.425147587021146	0.638134655736522	-1.13568827266879	0.873458710377888	-0.381339664810824	0.616753788767015	-2.04709702913386	-1.06328224275767
AL1G64230	AT1G55970	OG0022383	HAC4	protein_coding	histone acetyltransferase of the CBP family 4	histone acetyltransferase of the CBP family 4	histone acetyltransferase of the CBP family 4 (HAC4)%3B FUNCTIONS IN: histone acetyltransferase activity%3B INVOLVED IN: regulation of transcription%2C D-dependent%3B LOCATED IN: nucleus%2C chloroplast%3B EXPRESSED IN: 23 plant structures%3B EXPRESSED DURING: 13 growth stages%3B CONTAINS InterPro DOMAIN/s: Zinc finger%2C PHD-type%2C conserved site (InterPro:IPR019786)%2C Zinc finger%2C TAZ-type (…	HAC4 is most likely to be an expressed pseudogene that lacks HAT function. there is a single nucleotide deletion in both the HAC4 genomic and cD sequences relative to its homologs. The resulting frameshift within the open reading frame causes a stop codon to occur within the predicted acetyltransferase catalytic domain.	histone acetyltransferase of the CBP family 4 (HAC4)%3B FUNCTIONS IN: histone acetyltransferase activity%3B INVOLVED IN: regulation of transcription%2C D-dependent%3B LOCATED IN: nucleus%2C chloroplast%3B EXPRESSED IN: 23 plant structures%3B EXPRESSED DURING: 13 growth stages%3B CONTAINS InterPro DOMAIN/s: Zinc finger%2C PHD-type%2C conserved site (InterPro:IPR019786)%2C Zinc finger%2C TAZ-type (…	scaffold_1	29631795	29638336	6542	-	scaffold_1	29635881	29636183	303	*	0.427375813102904	-0.182589444382391	258.040787732766	0.519375	6.27731314633248	0.00129979298925	13.7168	0.4533929	0.51803571	0.21047619	0.044758065	0.487142857	0.03375	NO	NO	NO	0	0.25	A	A	-0.415110653470179	-4.09769908937404	-2.03283531423816	0.230283375765788	1.35623057596531	-2.36430790602573	-1.98902739202784	0.208902508796281	3.68258843590386	-2.26311869000395
AL1G64230	AT1G55970	OG0022383	HAC4	protein_coding	histone acetyltransferase of the CBP family 4	histone acetyltransferase of the CBP family 4	histone acetyltransferase of the CBP family 4 (HAC4)%3B FUNCTIONS IN: histone acetyltransferase activity%3B INVOLVED IN: regulation of transcription%2C D-dependent%3B LOCATED IN: nucleus%2C chloroplast%3B EXPRESSED IN: 23 plant structures%3B EXPRESSED DURING: 13 growth stages%3B CONTAINS InterPro DOMAIN/s: Zinc finger%2C PHD-type%2C conserved site (InterPro:IPR019786)%2C Zinc finger%2C TAZ-type (…	HAC4 is most likely to be an expressed pseudogene that lacks HAT function. there is a single nucleotide deletion in both the HAC4 genomic and cD sequences relative to its homologs. The resulting frameshift within the open reading frame causes a stop codon to occur within the predicted acetyltransferase catalytic domain.	histone acetyltransferase of the CBP family 4 (HAC4)%3B FUNCTIONS IN: histone acetyltransferase activity%3B INVOLVED IN: regulation of transcription%2C D-dependent%3B LOCATED IN: nucleus%2C chloroplast%3B EXPRESSED IN: 23 plant structures%3B EXPRESSED DURING: 13 growth stages%3B CONTAINS InterPro DOMAIN/s: Zinc finger%2C PHD-type%2C conserved site (InterPro:IPR019786)%2C Zinc finger%2C TAZ-type (…	scaffold_1	29631795	29638336	6542	-	scaffold_1	29631687	29632626	940	*	0.279712587559563	-0.162720182851916	174.21096498225	0.344910714285714	4.95710511375012	3.47844308701E-4	11.222	0.2176786	0.34267857	0.122645503	0.109435484	0.281428571	0.06375	NO	NO	NO	0	0.25	A	A	-2.62812860906981	0.204765665539984	-3.38228524785713	0.0430047267996351	-0.856787379634324	1.93815684888829	-3.33847732564681	0.0216238598301282	-2.83289427460979	-3.42528997465676
AL1G64230	AT1G55970	OG0022383	HAC4	protein_coding	histone acetyltransferase of the CBP family 4	histone acetyltransferase of the CBP family 4	histone acetyltransferase of the CBP family 4 (HAC4)%3B FUNCTIONS IN: histone acetyltransferase activity%3B INVOLVED IN: regulation of transcription%2C D-dependent%3B LOCATED IN: nucleus%2C chloroplast%3B EXPRESSED IN: 23 plant structures%3B EXPRESSED DURING: 13 growth stages%3B CONTAINS InterPro DOMAIN/s: Zinc finger%2C PHD-type%2C conserved site (InterPro:IPR019786)%2C Zinc finger%2C TAZ-type (…	HAC4 is most likely to be an expressed pseudogene that lacks HAT function. there is a single nucleotide deletion in both the HAC4 genomic and cD sequences relative to its homologs. The resulting frameshift within the open reading frame causes a stop codon to occur within the predicted acetyltransferase catalytic domain.	histone acetyltransferase of the CBP family 4 (HAC4)%3B FUNCTIONS IN: histone acetyltransferase activity%3B INVOLVED IN: regulation of transcription%2C D-dependent%3B LOCATED IN: nucleus%2C chloroplast%3B EXPRESSED IN: 23 plant structures%3B EXPRESSED DURING: 13 growth stages%3B CONTAINS InterPro DOMAIN/s: Zinc finger%2C PHD-type%2C conserved site (InterPro:IPR019786)%2C Zinc finger%2C TAZ-type (…	scaffold_1	29631795	29638336	6542	-	scaffold_1	29636411	29636754	344	*	0.485864261823474	-0.147956349727617	334.313672511289	0.610535714285714	7.29660265163316	0.00129979298925	14.4052	0.5858929	0.60839286	0.308888889	0.036048387	0.607142857	0.02125	NO	NO	NO	0	0.25	A	B	0.510516948050044	-4.03746157092933	-5.41197132070993	0.241381369778597	2.28185817748553	-2.30407038758102	-5.36816339849961	0.22000050280909	4.54797851897937	-5.65335269048853
AL1G64230	AT1G55970	OG0022383	HAC4	protein_coding	histone acetyltransferase of the CBP family 4	histone acetyltransferase of the CBP family 4	histone acetyltransferase of the CBP family 4 (HAC4)%3B FUNCTIONS IN: histone acetyltransferase activity%3B INVOLVED IN: regulation of transcription%2C D-dependent%3B LOCATED IN: nucleus%2C chloroplast%3B EXPRESSED IN: 23 plant structures%3B EXPRESSED DURING: 13 growth stages%3B CONTAINS InterPro DOMAIN/s: Zinc finger%2C PHD-type%2C conserved site (InterPro:IPR019786)%2C Zinc finger%2C TAZ-type (…	HAC4 is most likely to be an expressed pseudogene that lacks HAT function. there is a single nucleotide deletion in both the HAC4 genomic and cD sequences relative to its homologs. The resulting frameshift within the open reading frame causes a stop codon to occur within the predicted acetyltransferase catalytic domain.	histone acetyltransferase of the CBP family 4 (HAC4)%3B FUNCTIONS IN: histone acetyltransferase activity%3B INVOLVED IN: regulation of transcription%2C D-dependent%3B LOCATED IN: nucleus%2C chloroplast%3B EXPRESSED IN: 23 plant structures%3B EXPRESSED DURING: 13 growth stages%3B CONTAINS InterPro DOMAIN/s: Zinc finger%2C PHD-type%2C conserved site (InterPro:IPR019786)%2C Zinc finger%2C TAZ-type (…	scaffold_1	29631795	29638336	6542	-	scaffold_1	29636205	29636406	202	*	0.314180359425364	-0.0847195934624912	211.635633291126	0.396964285714286	4.36603676922756	0.00373213815884	10.2244	0.3716071	0.39696429	0.24952381	0.022016129	0.422857143	0.05125	NO	NO	NO	0	0.25	A	A	0.569126556006562	-3.94861123122337	-4.6829219400033	0.256641111546209	2.34046778544205	-2.21522004787506	-4.63911401779298	0.235260244576702	4.51773778722993	-4.93956305154951
AL1G64230	AT1G55970	OG0022383	HAC4	protein_coding	histone acetyltransferase of the CBP family 4	histone acetyltransferase of the CBP family 4	histone acetyltransferase of the CBP family 4 (HAC4)%3B FUNCTIONS IN: histone acetyltransferase activity%3B INVOLVED IN: regulation of transcription%2C D-dependent%3B LOCATED IN: nucleus%2C chloroplast%3B EXPRESSED IN: 23 plant structures%3B EXPRESSED DURING: 13 growth stages%3B CONTAINS InterPro DOMAIN/s: Zinc finger%2C PHD-type%2C conserved site (InterPro:IPR019786)%2C Zinc finger%2C TAZ-type (…	HAC4 is most likely to be an expressed pseudogene that lacks HAT function. there is a single nucleotide deletion in both the HAC4 genomic and cD sequences relative to its homologs. The resulting frameshift within the open reading frame causes a stop codon to occur within the predicted acetyltransferase catalytic domain.	histone acetyltransferase of the CBP family 4 (HAC4)%3B FUNCTIONS IN: histone acetyltransferase activity%3B INVOLVED IN: regulation of transcription%2C D-dependent%3B LOCATED IN: nucleus%2C chloroplast%3B EXPRESSED IN: 23 plant structures%3B EXPRESSED DURING: 13 growth stages%3B CONTAINS InterPro DOMAIN/s: Zinc finger%2C PHD-type%2C conserved site (InterPro:IPR019786)%2C Zinc finger%2C TAZ-type (…	scaffold_1	29631795	29638336	6542	-	scaffold_1	29636411	29636754	344	*	0.485864261823474	-0.147956349727617	334.313672511289	0.610535714285714	7.29660265163316	0.00129979298925	14.4052	0.5858929	0.60839286	0.308888889	0.036048387	0.607142857	0.02125	NO	NO	NO	0	0.25	A	A	0.510516948050044	-4.03746157092933	-5.41197132070993	0.241381369778597	2.28185817748553	-2.30407038758102	-5.36816339849961	0.22000050280909	4.54797851897937	-5.65335269048853
AL1G64230	AT1G55970	OG0022383	HAC4	protein_coding	histone acetyltransferase of the CBP family 4	histone acetyltransferase of the CBP family 4	histone acetyltransferase of the CBP family 4 (HAC4)%3B FUNCTIONS IN: histone acetyltransferase activity%3B INVOLVED IN: regulation of transcription%2C D-dependent%3B LOCATED IN: nucleus%2C chloroplast%3B EXPRESSED IN: 23 plant structures%3B EXPRESSED DURING: 13 growth stages%3B CONTAINS InterPro DOMAIN/s: Zinc finger%2C PHD-type%2C conserved site (InterPro:IPR019786)%2C Zinc finger%2C TAZ-type (…	HAC4 is most likely to be an expressed pseudogene that lacks HAT function. there is a single nucleotide deletion in both the HAC4 genomic and cD sequences relative to its homologs. The resulting frameshift within the open reading frame causes a stop codon to occur within the predicted acetyltransferase catalytic domain.	histone acetyltransferase of the CBP family 4 (HAC4)%3B FUNCTIONS IN: histone acetyltransferase activity%3B INVOLVED IN: regulation of transcription%2C D-dependent%3B LOCATED IN: nucleus%2C chloroplast%3B EXPRESSED IN: 23 plant structures%3B EXPRESSED DURING: 13 growth stages%3B CONTAINS InterPro DOMAIN/s: Zinc finger%2C PHD-type%2C conserved site (InterPro:IPR019786)%2C Zinc finger%2C TAZ-type (…	scaffold_1	29631795	29638336	6542	-	scaffold_1	29636205	29636406	202	*	0.314180359425364	-0.0847195934624912	211.635633291126	0.396964285714286	4.36603676922756	0.00373213815884	10.2244	0.3716071	0.39696429	0.24952381	0.022016129	0.422857143	0.05125	NO	NO	NO	0	0.25	A	B	0.569126556006562	-3.94861123122337	-4.6829219400033	0.256641111546209	2.34046778544205	-2.21522004787506	-4.63911401779298	0.235260244576702	4.51773778722993	-4.93956305154951
AL1G64230	AT1G55970	OG0022383	HAC4	protein_coding	histone acetyltransferase of the CBP family 4	histone acetyltransferase of the CBP family 4	histone acetyltransferase of the CBP family 4 (HAC4)%3B FUNCTIONS IN: histone acetyltransferase activity%3B INVOLVED IN: regulation of transcription%2C D-dependent%3B LOCATED IN: nucleus%2C chloroplast%3B EXPRESSED IN: 23 plant structures%3B EXPRESSED DURING: 13 growth stages%3B CONTAINS InterPro DOMAIN/s: Zinc finger%2C PHD-type%2C conserved site (InterPro:IPR019786)%2C Zinc finger%2C TAZ-type (…	HAC4 is most likely to be an expressed pseudogene that lacks HAT function. there is a single nucleotide deletion in both the HAC4 genomic and cD sequences relative to its homologs. The resulting frameshift within the open reading frame causes a stop codon to occur within the predicted acetyltransferase catalytic domain.	histone acetyltransferase of the CBP family 4 (HAC4)%3B FUNCTIONS IN: histone acetyltransferase activity%3B INVOLVED IN: regulation of transcription%2C D-dependent%3B LOCATED IN: nucleus%2C chloroplast%3B EXPRESSED IN: 23 plant structures%3B EXPRESSED DURING: 13 growth stages%3B CONTAINS InterPro DOMAIN/s: Zinc finger%2C PHD-type%2C conserved site (InterPro:IPR019786)%2C Zinc finger%2C TAZ-type (…	scaffold_1	29631795	29638336	6542	-	scaffold_1	29635881	29636183	303	*	0.427375813102904	-0.182589444382391	258.040787732766	0.519375	6.27731314633248	0.00129979298925	13.7168	0.4533929	0.51803571	0.21047619	0.044758065	0.487142857	0.03375	NO	NO	NO	0	0.25	A	A	-0.415110653470179	-4.09769908937404	-2.03283531423816	0.230283375765788	1.35623057596531	-2.36430790602573	-1.98902739202784	0.208902508796281	3.68258843590386	-2.26311869000395
AL1G64230	AT1G55970	OG0022383	HAC4	protein_coding	histone acetyltransferase of the CBP family 4	histone acetyltransferase of the CBP family 4	histone acetyltransferase of the CBP family 4 (HAC4)%3B FUNCTIONS IN: histone acetyltransferase activity%3B INVOLVED IN: regulation of transcription%2C D-dependent%3B LOCATED IN: nucleus%2C chloroplast%3B EXPRESSED IN: 23 plant structures%3B EXPRESSED DURING: 13 growth stages%3B CONTAINS InterPro DOMAIN/s: Zinc finger%2C PHD-type%2C conserved site (InterPro:IPR019786)%2C Zinc finger%2C TAZ-type (…	HAC4 is most likely to be an expressed pseudogene that lacks HAT function. there is a single nucleotide deletion in both the HAC4 genomic and cD sequences relative to its homologs. The resulting frameshift within the open reading frame causes a stop codon to occur within the predicted acetyltransferase catalytic domain.	histone acetyltransferase of the CBP family 4 (HAC4)%3B FUNCTIONS IN: histone acetyltransferase activity%3B INVOLVED IN: regulation of transcription%2C D-dependent%3B LOCATED IN: nucleus%2C chloroplast%3B EXPRESSED IN: 23 plant structures%3B EXPRESSED DURING: 13 growth stages%3B CONTAINS InterPro DOMAIN/s: Zinc finger%2C PHD-type%2C conserved site (InterPro:IPR019786)%2C Zinc finger%2C TAZ-type (…	scaffold_1	29631795	29638336	6542	-	scaffold_1	29636761	29639721	2961	*	0.463446297433996	-0.185711913141727	316.269057125505	0.582232142857143	6.83791437640871	8.5826388779E-4	4.7018	0.4726786	0.57767857	0.244656085	0.072177419	0.531428571	0.05875	NO	NO	NO	0	0.25	A	A	-2.90702950210428	-0.859932472970418	-0.425147587021146	0.638134655736522	-1.13568827266879	0.873458710377888	-0.381339664810824	0.616753788767015	-2.04709702913386	-1.06328224275767
AL1G64230	AT1G55970	OG0022383	HAC4	protein_coding	histone acetyltransferase of the CBP family 4	histone acetyltransferase of the CBP family 4	histone acetyltransferase of the CBP family 4 (HAC4)%3B FUNCTIONS IN: histone acetyltransferase activity%3B INVOLVED IN: regulation of transcription%2C D-dependent%3B LOCATED IN: nucleus%2C chloroplast%3B EXPRESSED IN: 23 plant structures%3B EXPRESSED DURING: 13 growth stages%3B CONTAINS InterPro DOMAIN/s: Zinc finger%2C PHD-type%2C conserved site (InterPro:IPR019786)%2C Zinc finger%2C TAZ-type (…	HAC4 is most likely to be an expressed pseudogene that lacks HAT function. there is a single nucleotide deletion in both the HAC4 genomic and cD sequences relative to its homologs. The resulting frameshift within the open reading frame causes a stop codon to occur within the predicted acetyltransferase catalytic domain.	histone acetyltransferase of the CBP family 4 (HAC4)%3B FUNCTIONS IN: histone acetyltransferase activity%3B INVOLVED IN: regulation of transcription%2C D-dependent%3B LOCATED IN: nucleus%2C chloroplast%3B EXPRESSED IN: 23 plant structures%3B EXPRESSED DURING: 13 growth stages%3B CONTAINS InterPro DOMAIN/s: Zinc finger%2C PHD-type%2C conserved site (InterPro:IPR019786)%2C Zinc finger%2C TAZ-type (…	scaffold_1	29631795	29638336	6542	-	scaffold_1	29633611	29634300	690	*	0.231103890901969	-0.124262974995989	213.547383878765	0.362053571428571	3.21931620119736	0.00129979298925	10.5846	0.2389286	0.33142857	0.161058201	0.21016129	0.451428571	0.2125	NO	NO	NO	0	0.25	A	A	-2.36135384181945	0.412585104174272	-3.13034593702978	0.500796979828009	-0.590012612383964	2.14597628752258	-3.08653801481946	0.479416112858502	-2.77393894599372	-3.63114291685779
AL1G64230	AT1G55970	OG0022383	HAC4	protein_coding	histone acetyltransferase of the CBP family 4	histone acetyltransferase of the CBP family 4	histone acetyltransferase of the CBP family 4 (HAC4)%3B FUNCTIONS IN: histone acetyltransferase activity%3B INVOLVED IN: regulation of transcription%2C D-dependent%3B LOCATED IN: nucleus%2C chloroplast%3B EXPRESSED IN: 23 plant structures%3B EXPRESSED DURING: 13 growth stages%3B CONTAINS InterPro DOMAIN/s: Zinc finger%2C PHD-type%2C conserved site (InterPro:IPR019786)%2C Zinc finger%2C TAZ-type (…	HAC4 is most likely to be an expressed pseudogene that lacks HAT function. there is a single nucleotide deletion in both the HAC4 genomic and cD sequences relative to its homologs. The resulting frameshift within the open reading frame causes a stop codon to occur within the predicted acetyltransferase catalytic domain.	histone acetyltransferase of the CBP family 4 (HAC4)%3B FUNCTIONS IN: histone acetyltransferase activity%3B INVOLVED IN: regulation of transcription%2C D-dependent%3B LOCATED IN: nucleus%2C chloroplast%3B EXPRESSED IN: 23 plant structures%3B EXPRESSED DURING: 13 growth stages%3B CONTAINS InterPro DOMAIN/s: Zinc finger%2C PHD-type%2C conserved site (InterPro:IPR019786)%2C Zinc finger%2C TAZ-type (…	scaffold_1	29631795	29638336	6542	-	scaffold_1	29631687	29632626	940	*	0.279712587559563	-0.162720182851916	174.21096498225	0.344910714285714	4.95710511375012	3.47844308701E-4	11.222	0.2176786	0.34267857	0.122645503	0.109435484	0.281428571	0.06375	NO	NO	NO	0	0.25	A	B	-2.62812860906981	0.204765665539984	-3.38228524785713	0.0430047267996351	-0.856787379634324	1.93815684888829	-3.33847732564681	0.0216238598301282	-2.83289427460979	-3.42528997465676
AL1G64270	AT1G56030	OG0017284	.	protein_coding	RING/U-box protein	.	RING/U-box superfamily protein%3B FUNCTIONS IN: ubiquitin-protein ligase activity%2C R binding%3B INVOLVED IN: translation%2C protein ubiquitination%3B LOCATED IN: ubiquitin ligase complex%3B EXPRESSED IN: flower%3B EXPRESSED DURING: petal differentiation and expansion stage%3B CONTAINS InterPro DOMAIN/s: U box domain (InterPro:IPR003613)%3B BEST Arabidopsis thaliana protein match is: HEAT/U-box …	.	RING/U-box superfamily protein%3B FUNCTIONS IN: ubiquitin-protein ligase activity%2C R binding%3B INVOLVED IN: translation%2C protein ubiquitination%3B LOCATED IN: ubiquitin ligase complex%3B EXPRESSED IN: flower%3B EXPRESSED DURING: petal differentiation and expansion stage%3B CONTAINS InterPro DOMAIN/s: U box domain (InterPro:IPR003613)%3B BEST Arabidopsis thaliana protein match is: HEAT/U-box …	scaffold_1	29655669	29658396	2728	-	scaffold_1	29656385	29656987	603	*	0.192668180739475	-0.00450058504303684	234.09939376141	0.409285714285714	2.54593659863036	0.0184305763572	13.6783	0.2185714	0.33464286	0.304973545	0.232580645	0.428571429	0.21	NO	NO	NO	NO	NO	C	B	-1.1386361585886	-0.0798566091113124	-0.524348690659419	0.824026055451069	0.632705070846887	1.65353457423699	-0.480540768449097	0.802645188481562	-1.05877954947729	-1.34837474611049
AL1G64270	AT1G56030	OG0017284	.	protein_coding	RING/U-box protein	.	RING/U-box superfamily protein%3B FUNCTIONS IN: ubiquitin-protein ligase activity%2C R binding%3B INVOLVED IN: translation%2C protein ubiquitination%3B LOCATED IN: ubiquitin ligase complex%3B EXPRESSED IN: flower%3B EXPRESSED DURING: petal differentiation and expansion stage%3B CONTAINS InterPro DOMAIN/s: U box domain (InterPro:IPR003613)%3B BEST Arabidopsis thaliana protein match is: HEAT/U-box …	.	RING/U-box superfamily protein%3B FUNCTIONS IN: ubiquitin-protein ligase activity%2C R binding%3B INVOLVED IN: translation%2C protein ubiquitination%3B LOCATED IN: ubiquitin ligase complex%3B EXPRESSED IN: flower%3B EXPRESSED DURING: petal differentiation and expansion stage%3B CONTAINS InterPro DOMAIN/s: U box domain (InterPro:IPR003613)%3B BEST Arabidopsis thaliana protein match is: HEAT/U-box …	scaffold_1	29655669	29658396	2728	-	scaffold_1	29656385	29656987	603	*	0.192668180739475	-0.00450058504303684	234.09939376141	0.409285714285714	2.54593659863036	0.0184305763572	13.6783	0.2185714	0.33464286	0.304973545	0.232580645	0.428571429	0.21	NO	NO	NO	NO	NO	C	B	-1.1386361585886	-0.0798566091113124	-0.524348690659419	0.824026055451069	0.632705070846887	1.65353457423699	-0.480540768449097	0.802645188481562	-1.05877954947729	-1.34837474611049
AL1G64270	AT1G56030	OG0017284	.	protein_coding	RING/U-box protein	.	RING/U-box superfamily protein%3B FUNCTIONS IN: ubiquitin-protein ligase activity%2C R binding%3B INVOLVED IN: translation%2C protein ubiquitination%3B LOCATED IN: ubiquitin ligase complex%3B EXPRESSED IN: flower%3B EXPRESSED DURING: petal differentiation and expansion stage%3B CONTAINS InterPro DOMAIN/s: U box domain (InterPro:IPR003613)%3B BEST Arabidopsis thaliana protein match is: HEAT/U-box …	.	RING/U-box superfamily protein%3B FUNCTIONS IN: ubiquitin-protein ligase activity%2C R binding%3B INVOLVED IN: translation%2C protein ubiquitination%3B LOCATED IN: ubiquitin ligase complex%3B EXPRESSED IN: flower%3B EXPRESSED DURING: petal differentiation and expansion stage%3B CONTAINS InterPro DOMAIN/s: U box domain (InterPro:IPR003613)%3B BEST Arabidopsis thaliana protein match is: HEAT/U-box …	scaffold_1	29655669	29658396	2728	-	scaffold_1	29656385	29656987	603	*	0.192668180739475	-0.00450058504303684	234.09939376141	0.409285714285714	2.54593659863036	0.0184305763572	13.6783	0.2185714	0.33464286	0.304973545	0.232580645	0.428571429	0.21	NO	MODERATE	NO	NO	NO	C	B	-1.1386361585886	-0.0798566091113124	-0.524348690659419	0.824026055451069	0.632705070846887	1.65353457423699	-0.480540768449097	0.802645188481562	-1.05877954947729	-1.34837474611049
AL2G12590	AT1G63010	OG0014421	.	protein_coding	Major Facilitator Superfamily with SPX (SYG1/Pho81/XPR1) domain-containing protein	.	Major Facilitator Superfamily with SPX (SYG1/Pho81/XPR1) domain-containing protein%3B INVOLVED IN: transmembrane transport%3B LOCATED IN: vacuolar membrane%2C plant-type vacuole%3B EXPRESSED IN: 25 plant structures%3B EXPRESSED DURING: 13 growth stages%3B CONTAINS InterPro DOMAIN/s: SPX%2C N-terminal (InterPro:IPR004331)%2C Major facilitator superfamily MFS-1 (InterPro:IPR011701)%2C Major facilit…	.	Major Facilitator Superfamily with SPX (SYG1/Pho81/XPR1) domain-containing protein%3B INVOLVED IN: transmembrane transport%3B LOCATED IN: vacuolar membrane%2C plant-type vacuole%3B EXPRESSED IN: 25 plant structures%3B EXPRESSED DURING: 13 growth stages%3B CONTAINS InterPro DOMAIN/s: SPX%2C N-terminal (InterPro:IPR004331)%2C Major facilitator superfamily MFS-1 (InterPro:IPR011701)%2C Major facilit…	scaffold_2	1289828	1294721	4894	+	scaffold_2	1292601	1293039	439	*	0.242476771585796	0.0104861387269154	218.963519956291	0.372321428571429	3.10787781321595	0.0184305763572	8.0713	0.26625	0.34267857	0.327830688	0.093790323	0.36	0.09375	NO	NO	NO	NO	NO	B	B	1.09459200665121	-2.88240715475185	0.091328000174911	0.217798132501377	2.8659332360867	-1.14901597140354	0.135135922385233	0.19641726553187	3.97699916140306	-0.126470132326466
AL2G12590	AT1G63010	OG0014421	.	protein_coding	Major Facilitator Superfamily with SPX (SYG1/Pho81/XPR1) domain-containing protein	.	Major Facilitator Superfamily with SPX (SYG1/Pho81/XPR1) domain-containing protein%3B INVOLVED IN: transmembrane transport%3B LOCATED IN: vacuolar membrane%2C plant-type vacuole%3B EXPRESSED IN: 25 plant structures%3B EXPRESSED DURING: 13 growth stages%3B CONTAINS InterPro DOMAIN/s: SPX%2C N-terminal (InterPro:IPR004331)%2C Major facilitator superfamily MFS-1 (InterPro:IPR011701)%2C Major facilit…	.	Major Facilitator Superfamily with SPX (SYG1/Pho81/XPR1) domain-containing protein%3B INVOLVED IN: transmembrane transport%3B LOCATED IN: vacuolar membrane%2C plant-type vacuole%3B EXPRESSED IN: 25 plant structures%3B EXPRESSED DURING: 13 growth stages%3B CONTAINS InterPro DOMAIN/s: SPX%2C N-terminal (InterPro:IPR004331)%2C Major facilitator superfamily MFS-1 (InterPro:IPR011701)%2C Major facilit…	scaffold_2	1289828	1294721	4894	+	scaffold_2	1292601	1293039	439	*	0.242476771585796	0.0104861387269154	218.963519956291	0.372321428571429	3.10787781321595	0.0184305763572	8.0713	0.26625	0.34267857	0.327830688	0.093790323	0.36	0.09375	NO	NO	NO	NO	NO	B	B	1.09459200665121	-2.88240715475185	0.091328000174911	0.217798132501377	2.8659332360867	-1.14901597140354	0.135135922385233	0.19641726553187	3.97699916140306	-0.126470132326466
AL2G16130	AT1G60530	OG0000096	DRP4A	protein_coding	Dynamin related protein 4A	Dynamin related protein 4A	Dynamin related protein 4A (DRP4A)%3B FUNCTIONS IN: GTP binding%2C GTPase activity%3B INVOLVED IN: biological_process unknown%3B LOCATED IN: cellular_component unknown%3B CONTAINS InterPro DOMAIN/s: Dynamin%2C GTPase domain (InterPro:IPR001401)%2C Interferon-induced Mx protein (InterPro:IPR015577)%3B BEST Arabidopsis thaliana protein match is: Dynamin related protein 4C (TAIR:AT1G60500.1)%3B Has …	.	Dynamin related protein 4A (DRP4A)%3B FUNCTIONS IN: GTP binding%2C GTPase activity%3B INVOLVED IN: biological_process unknown%3B LOCATED IN: cellular_component unknown%3B CONTAINS InterPro DOMAIN/s: Dynamin%2C GTPase domain (InterPro:IPR001401)%2C Interferon-induced Mx protein (InterPro:IPR015577)%3B BEST Arabidopsis thaliana protein match is: Dynamin related protein 4C (TAIR:AT1G60500.1)%3B Has …	scaffold_2	3112067	3114837	2771	-	scaffold_2	3112991	3113146	156	*	0.134613918638456	-0.121919358503759	176.465203381512	0.294642857142857	4.58316831322421	0.00350216332827	9.1301	-0.1891071	0.23125	0.10021164	0.370403226	0.107142857	0.29625	NO	NO	NO	0.0714285714285714	0	C	B	-1.18309861979699	0.156575650784215	-0.558990345898174	-0.933618746327559	0.588242609638497	1.88996683413252	-0.515182423687852	-0.954999613297066	-1.33967427058121	0.374628400429385
AL2G16130	AT1G60530	OG0000096	DRP4A	protein_coding	Dynamin related protein 4A	Dynamin related protein 4A	Dynamin related protein 4A (DRP4A)%3B FUNCTIONS IN: GTP binding%2C GTPase activity%3B INVOLVED IN: biological_process unknown%3B LOCATED IN: cellular_component unknown%3B CONTAINS InterPro DOMAIN/s: Dynamin%2C GTPase domain (InterPro:IPR001401)%2C Interferon-induced Mx protein (InterPro:IPR015577)%3B BEST Arabidopsis thaliana protein match is: Dynamin related protein 4C (TAIR:AT1G60500.1)%3B Has …	.	Dynamin related protein 4A (DRP4A)%3B FUNCTIONS IN: GTP binding%2C GTPase activity%3B INVOLVED IN: biological_process unknown%3B LOCATED IN: cellular_component unknown%3B CONTAINS InterPro DOMAIN/s: Dynamin%2C GTPase domain (InterPro:IPR001401)%2C Interferon-induced Mx protein (InterPro:IPR015577)%3B BEST Arabidopsis thaliana protein match is: Dynamin related protein 4C (TAIR:AT1G60500.1)%3B Has …	scaffold_2	3112067	3114837	2771	-	scaffold_2	3112991	3113146	156	*	0.134613918638456	-0.121919358503759	176.465203381512	0.294642857142857	4.58316831322421	0.00350216332827	9.1301	-0.1891071	0.23125	0.10021164	0.370403226	0.107142857	0.29625	NO	NO	NO	0.0714285714285714	0	C	B	-1.18309861979699	0.156575650784215	-0.558990345898174	-0.933618746327559	0.588242609638497	1.88996683413252	-0.515182423687852	-0.954999613297066	-1.33967427058121	0.374628400429385
AL2G16130	AT1G60500	OG0000096	DRP4C	protein_coding	Dynamin related protein 4C	Dynamin related protein 4C	Dynamin related protein 4C (DRP4C)%3B FUNCTIONS IN: GTP binding%2C GTPase activity%3B INVOLVED IN: biological_process unknown%3B LOCATED IN: cellular_component unknown%3B EXPRESSED IN: egg cell%3B CONTAINS InterPro DOMAIN/s: Dynamin GTPase effector (InterPro:IPR003130)%2C Dynamin%2C GTPase domain (InterPro:IPR001401)%2C GTPase effector domain%2C GED (InterPro:IPR020850)%2C Dynamin central region …	.	Dynamin related protein 4C (DRP4C)%3B FUNCTIONS IN: GTP binding%2C GTPase activity%3B INVOLVED IN: biological_process unknown%3B LOCATED IN: cellular_component unknown%3B EXPRESSED IN: egg cell%3B CONTAINS InterPro DOMAIN/s: Dynamin GTPase effector (InterPro:IPR003130)%2C Dynamin%2C GTPase domain (InterPro:IPR001401)%2C GTPase effector domain%2C GED (InterPro:IPR020850)%2C Dynamin central region …	scaffold_2	3112067	3114837	2771	-	scaffold_2	3112991	3113146	156	*	0.134613918638456	-0.121919358503759	176.465203381512	0.294642857142857	4.58316831322421	0.00350216332827	9.1301	-0.1891071	0.23125	0.10021164	0.370403226	0.107142857	0.29625	NO	NO	NO	0.0714285714285714	0	C	B	-1.18309861979699	0.156575650784215	-0.558990345898174	-0.933618746327559	0.588242609638497	1.88996683413252	-0.515182423687852	-0.954999613297066	-1.33967427058121	0.374628400429385
AL2G16130	AT1G60500	OG0000096	DRP4C	protein_coding	Dynamin related protein 4C	Dynamin related protein 4C	Dynamin related protein 4C (DRP4C)%3B FUNCTIONS IN: GTP binding%2C GTPase activity%3B INVOLVED IN: biological_process unknown%3B LOCATED IN: cellular_component unknown%3B EXPRESSED IN: egg cell%3B CONTAINS InterPro DOMAIN/s: Dynamin GTPase effector (InterPro:IPR003130)%2C Dynamin%2C GTPase domain (InterPro:IPR001401)%2C GTPase effector domain%2C GED (InterPro:IPR020850)%2C Dynamin central region …	.	Dynamin related protein 4C (DRP4C)%3B FUNCTIONS IN: GTP binding%2C GTPase activity%3B INVOLVED IN: biological_process unknown%3B LOCATED IN: cellular_component unknown%3B EXPRESSED IN: egg cell%3B CONTAINS InterPro DOMAIN/s: Dynamin GTPase effector (InterPro:IPR003130)%2C Dynamin%2C GTPase domain (InterPro:IPR001401)%2C GTPase effector domain%2C GED (InterPro:IPR020850)%2C Dynamin central region …	scaffold_2	3112067	3114837	2771	-	scaffold_2	3112991	3113146	156	*	0.134613918638456	-0.121919358503759	176.465203381512	0.294642857142857	4.58316831322421	0.00350216332827	9.1301	-0.1891071	0.23125	0.10021164	0.370403226	0.107142857	0.29625	NO	NO	NO	0.0714285714285714	0	C	B	-1.18309861979699	0.156575650784215	-0.558990345898174	-0.933618746327559	0.588242609638497	1.88996683413252	-0.515182423687852	-0.954999613297066	-1.33967427058121	0.374628400429385
AL2G16880	AT1G59870	OG0001729	PEN3	protein_coding	ABC-2 and Plant PDR ABC-type transporter family protein	PENETRATION 3	PENETRATION 3 (PEN3)%3B FUNCTIONS IN: ATPase activity%2C coupled to transmembrane movement of substances%2C cadmium ion transmembrane transporter activity%3B INVOLVED IN: in 9 processes%3B LOCATED IN: mitochondrion%2C plasma membrane%2C chloroplast%2C membrane%2C chloroplast envelope%3B EXPRESSED IN: 29 plant structures%3B EXPRESSED DURING: 13 growth stages%3B CONTAINS InterPro DOMAIN/s: ATPase%2…	ATP binding cassette transporter. Localized to the plasma membrane in uninfected cells. In infected leaves%2C the protein concentrated at infection sites. Contributes to nonhost resistance to inappropriate pathogens that enter by direct penetration in a salicylic acid%E2%80%93dependent manner. Required for mlo resistance. Has Cd transporter activity (Cd2+ extrusion pump) and contributes to heavy …	PENETRATION 3 (PEN3)%3B FUNCTIONS IN: ATPase activity%2C coupled to transmembrane movement of substances%2C cadmium ion transmembrane transporter activity%3B INVOLVED IN: in 9 processes%3B LOCATED IN: mitochondrion%2C plasma membrane%2C chloroplast%2C membrane%2C chloroplast envelope%3B EXPRESSED IN: 29 plant structures%3B EXPRESSED DURING: 13 growth stages%3B CONTAINS InterPro DOMAIN/s: ATPase%2…	scaffold_2	3556153	3561771	5619	-	scaffold_2	3559681	3560414	734	*	0.217041414592122	-0.137651145910032	189.784116499632	0.369910714285714	4.04929030522624	0.00174139855141	26.415	-0.2778571	0.34357143	0.152910053	0.199354839	0.087142857	0.365	NO	NO	NO	NO	NO	B	B	-1.23564516486146	-0.947276874715265	0.855019036120305	-3.17125178916018	0.535696064574027	0.786114308633041	0.898826958330627	-3.19263265612969	-0.288368290146195	4.02627082528049
AL2G16880	AT1G59870	OG0001729	PEN3	protein_coding	ABC-2 and Plant PDR ABC-type transporter family protein	PENETRATION 3	PENETRATION 3 (PEN3)%3B FUNCTIONS IN: ATPase activity%2C coupled to transmembrane movement of substances%2C cadmium ion transmembrane transporter activity%3B INVOLVED IN: in 9 processes%3B LOCATED IN: mitochondrion%2C plasma membrane%2C chloroplast%2C membrane%2C chloroplast envelope%3B EXPRESSED IN: 29 plant structures%3B EXPRESSED DURING: 13 growth stages%3B CONTAINS InterPro DOMAIN/s: ATPase%2…	ATP binding cassette transporter. Localized to the plasma membrane in uninfected cells. In infected leaves%2C the protein concentrated at infection sites. Contributes to nonhost resistance to inappropriate pathogens that enter by direct penetration in a salicylic acid%E2%80%93dependent manner. Required for mlo resistance. Has Cd transporter activity (Cd2+ extrusion pump) and contributes to heavy …	PENETRATION 3 (PEN3)%3B FUNCTIONS IN: ATPase activity%2C coupled to transmembrane movement of substances%2C cadmium ion transmembrane transporter activity%3B INVOLVED IN: in 9 processes%3B LOCATED IN: mitochondrion%2C plasma membrane%2C chloroplast%2C membrane%2C chloroplast envelope%3B EXPRESSED IN: 29 plant structures%3B EXPRESSED DURING: 13 growth stages%3B CONTAINS InterPro DOMAIN/s: ATPase%2…	scaffold_2	3556153	3561771	5619	-	scaffold_2	3559681	3560414	734	*	0.217041414592122	-0.137651145910032	189.784116499632	0.369910714285714	4.04929030522624	0.00174139855141	26.415	-0.2778571	0.34357143	0.152910053	0.199354839	0.087142857	0.365	NO	NO	NO	NO	NO	B	B	-1.23564516486146	-0.947276874715265	0.855019036120305	-3.17125178916018	0.535696064574027	0.786114308633041	0.898826958330627	-3.19263265612969	-0.288368290146195	4.02627082528049
AL2G16880	AT1G59870	OG0001729	PEN3	protein_coding	ABC-2 and Plant PDR ABC-type transporter family protein	PENETRATION 3	PENETRATION 3 (PEN3)%3B FUNCTIONS IN: ATPase activity%2C coupled to transmembrane movement of substances%2C cadmium ion transmembrane transporter activity%3B INVOLVED IN: in 9 processes%3B LOCATED IN: mitochondrion%2C plasma membrane%2C chloroplast%2C membrane%2C chloroplast envelope%3B EXPRESSED IN: 29 plant structures%3B EXPRESSED DURING: 13 growth stages%3B CONTAINS InterPro DOMAIN/s: ATPase%2…	ATP binding cassette transporter. Localized to the plasma membrane in uninfected cells. In infected leaves%2C the protein concentrated at infection sites. Contributes to nonhost resistance to inappropriate pathogens that enter by direct penetration in a salicylic acid%E2%80%93dependent manner. Required for mlo resistance. Has Cd transporter activity (Cd2+ extrusion pump) and contributes to heavy …	PENETRATION 3 (PEN3)%3B FUNCTIONS IN: ATPase activity%2C coupled to transmembrane movement of substances%2C cadmium ion transmembrane transporter activity%3B INVOLVED IN: in 9 processes%3B LOCATED IN: mitochondrion%2C plasma membrane%2C chloroplast%2C membrane%2C chloroplast envelope%3B EXPRESSED IN: 29 plant structures%3B EXPRESSED DURING: 13 growth stages%3B CONTAINS InterPro DOMAIN/s: ATPase%2…	scaffold_2	3556153	3561771	5619	-	scaffold_2	3559681	3560414	734	*	0.217041414592122	-0.137651145910032	189.784116499632	0.369910714285714	4.04929030522624	0.00174139855141	26.415	-0.2778571	0.34357143	0.152910053	0.199354839	0.087142857	0.365	NO	NO	NO	NO	NO	B	B	-1.23564516486146	-0.947276874715265	0.855019036120305	-3.17125178916018	0.535696064574027	0.786114308633041	0.898826958330627	-3.19263265612969	-0.288368290146195	4.02627082528049
AL2G16880	AT1G59870	OG0001729	PEN3	protein_coding	ABC-2 and Plant PDR ABC-type transporter family protein	PENETRATION 3	PENETRATION 3 (PEN3)%3B FUNCTIONS IN: ATPase activity%2C coupled to transmembrane movement of substances%2C cadmium ion transmembrane transporter activity%3B INVOLVED IN: in 9 processes%3B LOCATED IN: mitochondrion%2C plasma membrane%2C chloroplast%2C membrane%2C chloroplast envelope%3B EXPRESSED IN: 29 plant structures%3B EXPRESSED DURING: 13 growth stages%3B CONTAINS InterPro DOMAIN/s: ATPase%2…	ATP binding cassette transporter. Localized to the plasma membrane in uninfected cells. In infected leaves%2C the protein concentrated at infection sites. Contributes to nonhost resistance to inappropriate pathogens that enter by direct penetration in a salicylic acid%E2%80%93dependent manner. Required for mlo resistance. Has Cd transporter activity (Cd2+ extrusion pump) and contributes to heavy …	PENETRATION 3 (PEN3)%3B FUNCTIONS IN: ATPase activity%2C coupled to transmembrane movement of substances%2C cadmium ion transmembrane transporter activity%3B INVOLVED IN: in 9 processes%3B LOCATED IN: mitochondrion%2C plasma membrane%2C chloroplast%2C membrane%2C chloroplast envelope%3B EXPRESSED IN: 29 plant structures%3B EXPRESSED DURING: 13 growth stages%3B CONTAINS InterPro DOMAIN/s: ATPase%2…	scaffold_2	3556153	3561771	5619	-	scaffold_2	3559681	3560414	734	*	0.217041414592122	-0.137651145910032	189.784116499632	0.369910714285714	4.04929030522624	0.00174139855141	26.415	-0.2778571	0.34357143	0.152910053	0.199354839	0.087142857	0.365	NO	NO	NO	NO	NO	B	B	-1.23564516486146	-0.947276874715265	0.855019036120305	-3.17125178916018	0.535696064574027	0.786114308633041	0.898826958330627	-3.19263265612969	-0.288368290146195	4.02627082528049
AL2G16880	AT1G15210	OG0001729	ABCG35	protein_coding	pleiotropic drug resistance 7	ATP-binding cassette G35	pleiotropic drug resistance 7 (PDR7)%3B FUNCTIONS IN: ATPase activity%2C coupled to transmembrane movement of substances%3B INVOLVED IN: drug transmembrane transport%3B LOCATED IN: plasma membrane%2C chloroplast%2C membrane%3B EXPRESSED IN: 9 plant structures%3B EXPRESSED DURING: 4 anthesis%2C F mature embryo stage%2C petal differentiation and expansion stage%2C E expanded cotyledon stage%2C D bi…	.	pleiotropic drug resistance 7 (PDR7)%3B FUNCTIONS IN: ATPase activity%2C coupled to transmembrane movement of substances%3B INVOLVED IN: drug transmembrane transport%3B LOCATED IN: plasma membrane%2C chloroplast%2C membrane%3B EXPRESSED IN: 9 plant structures%3B EXPRESSED DURING: 4 anthesis%2C F mature embryo stage%2C petal differentiation and expansion stage%2C E expanded cotyledon stage%2C D bi…	scaffold_2	3556153	3561771	5619	-	scaffold_2	3559681	3560414	734	*	0.217041414592122	-0.137651145910032	189.784116499632	0.369910714285714	4.04929030522624	0.00174139855141	26.415	-0.2778571	0.34357143	0.152910053	0.199354839	0.087142857	0.365	NO	NO	NO	NO	NO	B	B	-1.23564516486146	-0.947276874715265	0.855019036120305	-3.17125178916018	0.535696064574027	0.786114308633041	0.898826958330627	-3.19263265612969	-0.288368290146195	4.02627082528049
AL2G16880	AT1G15210	OG0001729	ABCG35	protein_coding	pleiotropic drug resistance 7	ATP-binding cassette G35	pleiotropic drug resistance 7 (PDR7)%3B FUNCTIONS IN: ATPase activity%2C coupled to transmembrane movement of substances%3B INVOLVED IN: drug transmembrane transport%3B LOCATED IN: plasma membrane%2C chloroplast%2C membrane%3B EXPRESSED IN: 9 plant structures%3B EXPRESSED DURING: 4 anthesis%2C F mature embryo stage%2C petal differentiation and expansion stage%2C E expanded cotyledon stage%2C D bi…	.	pleiotropic drug resistance 7 (PDR7)%3B FUNCTIONS IN: ATPase activity%2C coupled to transmembrane movement of substances%3B INVOLVED IN: drug transmembrane transport%3B LOCATED IN: plasma membrane%2C chloroplast%2C membrane%3B EXPRESSED IN: 9 plant structures%3B EXPRESSED DURING: 4 anthesis%2C F mature embryo stage%2C petal differentiation and expansion stage%2C E expanded cotyledon stage%2C D bi…	scaffold_2	3556153	3561771	5619	-	scaffold_2	3559681	3560414	734	*	0.217041414592122	-0.137651145910032	189.784116499632	0.369910714285714	4.04929030522624	0.00174139855141	26.415	-0.2778571	0.34357143	0.152910053	0.199354839	0.087142857	0.365	NO	NO	NO	NO	NO	B	B	-1.23564516486146	-0.947276874715265	0.855019036120305	-3.17125178916018	0.535696064574027	0.786114308633041	0.898826958330627	-3.19263265612969	-0.288368290146195	4.02627082528049
AL2G16880	AT1G15210	OG0001729	ABCG35	protein_coding	pleiotropic drug resistance 7	ATP-binding cassette G35	pleiotropic drug resistance 7 (PDR7)%3B FUNCTIONS IN: ATPase activity%2C coupled to transmembrane movement of substances%3B INVOLVED IN: drug transmembrane transport%3B LOCATED IN: plasma membrane%2C chloroplast%2C membrane%3B EXPRESSED IN: 9 plant structures%3B EXPRESSED DURING: 4 anthesis%2C F mature embryo stage%2C petal differentiation and expansion stage%2C E expanded cotyledon stage%2C D bi…	.	pleiotropic drug resistance 7 (PDR7)%3B FUNCTIONS IN: ATPase activity%2C coupled to transmembrane movement of substances%3B INVOLVED IN: drug transmembrane transport%3B LOCATED IN: plasma membrane%2C chloroplast%2C membrane%3B EXPRESSED IN: 9 plant structures%3B EXPRESSED DURING: 4 anthesis%2C F mature embryo stage%2C petal differentiation and expansion stage%2C E expanded cotyledon stage%2C D bi…	scaffold_2	3556153	3561771	5619	-	scaffold_2	3559681	3560414	734	*	0.217041414592122	-0.137651145910032	189.784116499632	0.369910714285714	4.04929030522624	0.00174139855141	26.415	-0.2778571	0.34357143	0.152910053	0.199354839	0.087142857	0.365	NO	NO	NO	NO	NO	B	B	-1.23564516486146	-0.947276874715265	0.855019036120305	-3.17125178916018	0.535696064574027	0.786114308633041	0.898826958330627	-3.19263265612969	-0.288368290146195	4.02627082528049
AL2G16880	AT1G15210	OG0001729	ABCG35	protein_coding	pleiotropic drug resistance 7	ATP-binding cassette G35	pleiotropic drug resistance 7 (PDR7)%3B FUNCTIONS IN: ATPase activity%2C coupled to transmembrane movement of substances%3B INVOLVED IN: drug transmembrane transport%3B LOCATED IN: plasma membrane%2C chloroplast%2C membrane%3B EXPRESSED IN: 9 plant structures%3B EXPRESSED DURING: 4 anthesis%2C F mature embryo stage%2C petal differentiation and expansion stage%2C E expanded cotyledon stage%2C D bi…	.	pleiotropic drug resistance 7 (PDR7)%3B FUNCTIONS IN: ATPase activity%2C coupled to transmembrane movement of substances%3B INVOLVED IN: drug transmembrane transport%3B LOCATED IN: plasma membrane%2C chloroplast%2C membrane%3B EXPRESSED IN: 9 plant structures%3B EXPRESSED DURING: 4 anthesis%2C F mature embryo stage%2C petal differentiation and expansion stage%2C E expanded cotyledon stage%2C D bi…	scaffold_2	3556153	3561771	5619	-	scaffold_2	3559681	3560414	734	*	0.217041414592122	-0.137651145910032	189.784116499632	0.369910714285714	4.04929030522624	0.00174139855141	26.415	-0.2778571	0.34357143	0.152910053	0.199354839	0.087142857	0.365	NO	NO	NO	NO	NO	B	B	-1.23564516486146	-0.947276874715265	0.855019036120305	-3.17125178916018	0.535696064574027	0.786114308633041	0.898826958330627	-3.19263265612969	-0.288368290146195	4.02627082528049
AL2G25520	AT1G67140	OG0016717	SWEETIE	protein_coding	HEAT repeat-containing protein	SWEETIE	SWEETIE (SWEETIE)%3B FUNCTIONS IN: binding%3B INVOLVED IN: trehalose metabolic process%2C carbohydrate metabolic process%2C starch metabolic process%3B LOCATED IN: cytosol%3B EXPRESSED IN: 25 plant structures%3B EXPRESSED DURING: 13 growth stages%3B CONTAINS InterPro DOMAIN/s: Armadillo-type fold (InterPro:IPR016024)%3B Has 8640 Blast hits to 5919 proteins in 625 species: Archae - 46%3B Bacteria …	.	SWEETIE (SWEETIE)%3B FUNCTIONS IN: binding%3B INVOLVED IN: trehalose metabolic process%2C carbohydrate metabolic process%2C starch metabolic process%3B LOCATED IN: cytosol%3B EXPRESSED IN: 25 plant structures%3B EXPRESSED DURING: 13 growth stages%3B CONTAINS InterPro DOMAIN/s: Armadillo-type fold (InterPro:IPR016024)%3B Has 8640 Blast hits to 5919 proteins in 625 species: Archae - 46%3B Bacteria …	scaffold_2	12198144	12214645	16502	-	scaffold_2	12208476	12208710	235	*	0.108497508924589	0.0300132292340265	260.646515104798	0.421696428571429	1.43647538961002	0.0437012438436	13.612	0.2575	0.28142857	0.312063492	0.335322581	0.49	0.2325	NO	NO	NO	0.0357142857142857	0	C	B	-0.12004159272355	0.255967556217996	-0.612527449448984	1.33314653078869	1.65129963671194	1.9893587395663	-0.568719527238662	1.31176566381918	-0.376009148941546	-1.94567398023767
AL2G25520	AT1G67140	OG0016717	SWEETIE	protein_coding	HEAT repeat-containing protein	SWEETIE	SWEETIE (SWEETIE)%3B FUNCTIONS IN: binding%3B INVOLVED IN: trehalose metabolic process%2C carbohydrate metabolic process%2C starch metabolic process%3B LOCATED IN: cytosol%3B EXPRESSED IN: 25 plant structures%3B EXPRESSED DURING: 13 growth stages%3B CONTAINS InterPro DOMAIN/s: Armadillo-type fold (InterPro:IPR016024)%3B Has 8640 Blast hits to 5919 proteins in 625 species: Archae - 46%3B Bacteria …	.	SWEETIE (SWEETIE)%3B FUNCTIONS IN: binding%3B INVOLVED IN: trehalose metabolic process%2C carbohydrate metabolic process%2C starch metabolic process%3B LOCATED IN: cytosol%3B EXPRESSED IN: 25 plant structures%3B EXPRESSED DURING: 13 growth stages%3B CONTAINS InterPro DOMAIN/s: Armadillo-type fold (InterPro:IPR016024)%3B Has 8640 Blast hits to 5919 proteins in 625 species: Archae - 46%3B Bacteria …	scaffold_2	12198144	12214645	16502	-	scaffold_2	12208476	12208710	235	*	0.108497508924589	0.0300132292340265	260.646515104798	0.421696428571429	1.43647538961002	0.0437012438436	13.612	0.2575	0.28142857	0.312063492	0.335322581	0.49	0.2325	NO	MODERATE	NO	0.0357142857142857	0	C	B	-0.12004159272355	0.255967556217996	-0.612527449448984	1.33314653078869	1.65129963671194	1.9893587395663	-0.568719527238662	1.31176566381918	-0.376009148941546	-1.94567398023767
AL2G32070	AT1G72410	OG0006142	.	protein_coding	COP1-interacting protein-like protein	.	COP1-interacting protein-related%3B FUNCTIONS IN: molecular_function unknown%3B INVOLVED IN: biological_process unknown%3B LOCATED IN: plasma membrane%3B EXPRESSED IN: 23 plant structures%3B EXPRESSED DURING: 13 growth stages%3B BEST Arabidopsis thaliana protein match is: unknown protein (TAIR:AT1G17360.1)%3B Has 14235 Blast hits to 10132 proteins in 704 species: Archae - 23%3B Bacteria - 1239%3B…	.	COP1-interacting protein-related%3B FUNCTIONS IN: molecular_function unknown%3B INVOLVED IN: biological_process unknown%3B LOCATED IN: plasma membrane%3B EXPRESSED IN: 23 plant structures%3B EXPRESSED DURING: 13 growth stages%3B BEST Arabidopsis thaliana protein match is: unknown protein (TAIR:AT1G17360.1)%3B Has 14235 Blast hits to 10132 proteins in 704 species: Archae - 23%3B Bacteria - 1239%3B…	scaffold_2	15375833	15381397	5565	-	scaffold_2	15378659	15378883	225	*	0.201967489978129	-0.155383970713842	244.051480977937	0.416875	2.80057596597692	0.0271975847832	14.6083	-0.30375	0.35232143	0.137460317	0.38266129	0.09	0.39375	NO	NO	NO	NO	NO	C	B	-2.09053703264103	-1.0014906413155	0.695982346160548	-0.557674199143651	-0.319195803205544	0.731900542032806	0.73979026837087	-0.579055066113158	-1.08904639132553	1.2536565453042
AL2G32070	AT1G72410	OG0006142	.	protein_coding	COP1-interacting protein-like protein	.	COP1-interacting protein-related%3B FUNCTIONS IN: molecular_function unknown%3B INVOLVED IN: biological_process unknown%3B LOCATED IN: plasma membrane%3B EXPRESSED IN: 23 plant structures%3B EXPRESSED DURING: 13 growth stages%3B BEST Arabidopsis thaliana protein match is: unknown protein (TAIR:AT1G17360.1)%3B Has 14235 Blast hits to 10132 proteins in 704 species: Archae - 23%3B Bacteria - 1239%3B…	.	COP1-interacting protein-related%3B FUNCTIONS IN: molecular_function unknown%3B INVOLVED IN: biological_process unknown%3B LOCATED IN: plasma membrane%3B EXPRESSED IN: 23 plant structures%3B EXPRESSED DURING: 13 growth stages%3B BEST Arabidopsis thaliana protein match is: unknown protein (TAIR:AT1G17360.1)%3B Has 14235 Blast hits to 10132 proteins in 704 species: Archae - 23%3B Bacteria - 1239%3B…	scaffold_2	15375833	15381397	5565	-	scaffold_2	15378659	15378883	225	*	0.201967489978129	-0.155383970713842	244.051480977937	0.416875	2.80057596597692	0.0271975847832	14.6083	-0.30375	0.35232143	0.137460317	0.38266129	0.09	0.39375	NO	MODERATE	NO	NO	NO	C	B	-2.09053703264103	-1.0014906413155	0.695982346160548	-0.557674199143651	-0.319195803205544	0.731900542032806	0.73979026837087	-0.579055066113158	-1.08904639132553	1.2536565453042
AL2G32070	AT1G72410	OG0006142	.	protein_coding	COP1-interacting protein-like protein	.	COP1-interacting protein-related%3B FUNCTIONS IN: molecular_function unknown%3B INVOLVED IN: biological_process unknown%3B LOCATED IN: plasma membrane%3B EXPRESSED IN: 23 plant structures%3B EXPRESSED DURING: 13 growth stages%3B BEST Arabidopsis thaliana protein match is: unknown protein (TAIR:AT1G17360.1)%3B Has 14235 Blast hits to 10132 proteins in 704 species: Archae - 23%3B Bacteria - 1239%3B…	.	COP1-interacting protein-related%3B FUNCTIONS IN: molecular_function unknown%3B INVOLVED IN: biological_process unknown%3B LOCATED IN: plasma membrane%3B EXPRESSED IN: 23 plant structures%3B EXPRESSED DURING: 13 growth stages%3B BEST Arabidopsis thaliana protein match is: unknown protein (TAIR:AT1G17360.1)%3B Has 14235 Blast hits to 10132 proteins in 704 species: Archae - 23%3B Bacteria - 1239%3B…	scaffold_2	15375833	15381397	5565	-	scaffold_2	15378659	15378883	225	*	0.201967489978129	-0.155383970713842	244.051480977937	0.416875	2.80057596597692	0.0271975847832	14.6083	-0.30375	0.35232143	0.137460317	0.38266129	0.09	0.39375	NO	NO	NO	NO	NO	C	B	-2.09053703264103	-1.0014906413155	0.695982346160548	-0.557674199143651	-0.319195803205544	0.731900542032806	0.73979026837087	-0.579055066113158	-1.08904639132553	1.2536565453042
AL2G32180	AT1G72490	OG0006150	.	protein_coding	hypothetical protein	.	unknown protein%3B BEST Arabidopsis thaliana protein match is: unknown protein (TAIR:AT1G17400.1)%3B Has 75 Blast hits to 75 proteins in 21 species: Archae - 0%3B Bacteria - 0%3B Metazoa - 3%3B Fungi - 4%3B Plants - 58%3B Viruses - 0%3B Other Eukaryotes - 10 (source: NCBI BLink).	.	unknown protein%3B BEST Arabidopsis thaliana protein match is: unknown protein (TAIR:AT1G17400.1)%3B Has 75 Blast hits to 75 proteins in 21 species: Archae - 0%3B Bacteria - 0%3B Metazoa - 3%3B Fungi - 4%3B Plants - 58%3B Viruses - 0%3B Other Eukaryotes - 10 (source: NCBI BLink).	scaffold_2	15429457	15431547	2091	-	scaffold_2	15430331	15430592	262	*	0.320432475364888	-0.167147635187707	259.289479762528	0.503303571428571	4.34046184309766	0.00388141334479	12.4843	-0.4110714	0.46857143	0.197354497	0.193709677	0.141428571	0.5525	NO	MODERATE	NO	NO	NO	B	B	-1.25383435353762	-1.15509631334953	1.12742841595237	-3.67343601823979	0.517506875897867	0.578294869998776	1.17123633816269	-3.6948168852093	-0.09873804018809	4.80086443419216
AL2G32180	AT1G72490	OG0006150	.	protein_coding	hypothetical protein	.	unknown protein%3B BEST Arabidopsis thaliana protein match is: unknown protein (TAIR:AT1G17400.1)%3B Has 75 Blast hits to 75 proteins in 21 species: Archae - 0%3B Bacteria - 0%3B Metazoa - 3%3B Fungi - 4%3B Plants - 58%3B Viruses - 0%3B Other Eukaryotes - 10 (source: NCBI BLink).	.	unknown protein%3B BEST Arabidopsis thaliana protein match is: unknown protein (TAIR:AT1G17400.1)%3B Has 75 Blast hits to 75 proteins in 21 species: Archae - 0%3B Bacteria - 0%3B Metazoa - 3%3B Fungi - 4%3B Plants - 58%3B Viruses - 0%3B Other Eukaryotes - 10 (source: NCBI BLink).	scaffold_2	15429457	15431547	2091	-	scaffold_2	15430331	15430592	262	*	0.320432475364888	-0.167147635187707	259.289479762528	0.503303571428571	4.34046184309766	0.00388141334479	12.4843	-0.4110714	0.46857143	0.197354497	0.193709677	0.141428571	0.5525	NO	NO	NO	NO	NO	B	B	-1.25383435353762	-1.15509631334953	1.12742841595237	-3.67343601823979	0.517506875897867	0.578294869998776	1.17123633816269	-3.6948168852093	-0.09873804018809	4.80086443419216
AL2G32180	AT1G72490	OG0006150	.	protein_coding	hypothetical protein	.	unknown protein%3B BEST Arabidopsis thaliana protein match is: unknown protein (TAIR:AT1G17400.1)%3B Has 75 Blast hits to 75 proteins in 21 species: Archae - 0%3B Bacteria - 0%3B Metazoa - 3%3B Fungi - 4%3B Plants - 58%3B Viruses - 0%3B Other Eukaryotes - 10 (source: NCBI BLink).	.	unknown protein%3B BEST Arabidopsis thaliana protein match is: unknown protein (TAIR:AT1G17400.1)%3B Has 75 Blast hits to 75 proteins in 21 species: Archae - 0%3B Bacteria - 0%3B Metazoa - 3%3B Fungi - 4%3B Plants - 58%3B Viruses - 0%3B Other Eukaryotes - 10 (source: NCBI BLink).	scaffold_2	15429457	15431547	2091	-	scaffold_2	15430331	15430592	262	*	0.320432475364888	-0.167147635187707	259.289479762528	0.503303571428571	4.34046184309766	0.00388141334479	12.4843	-0.4110714	0.46857143	0.197354497	0.193709677	0.141428571	0.5525	NO	NO	NO	NO	NO	B	B	-1.25383435353762	-1.15509631334953	1.12742841595237	-3.67343601823979	0.517506875897867	0.578294869998776	1.17123633816269	-3.6948168852093	-0.09873804018809	4.80086443419216
AL2G32180	AT1G72490	OG0006150	.	protein_coding	hypothetical protein	.	unknown protein%3B BEST Arabidopsis thaliana protein match is: unknown protein (TAIR:AT1G17400.1)%3B Has 75 Blast hits to 75 proteins in 21 species: Archae - 0%3B Bacteria - 0%3B Metazoa - 3%3B Fungi - 4%3B Plants - 58%3B Viruses - 0%3B Other Eukaryotes - 10 (source: NCBI BLink).	.	unknown protein%3B BEST Arabidopsis thaliana protein match is: unknown protein (TAIR:AT1G17400.1)%3B Has 75 Blast hits to 75 proteins in 21 species: Archae - 0%3B Bacteria - 0%3B Metazoa - 3%3B Fungi - 4%3B Plants - 58%3B Viruses - 0%3B Other Eukaryotes - 10 (source: NCBI BLink).	scaffold_2	15429457	15431547	2091	-	scaffold_2	15430331	15430592	262	*	0.320432475364888	-0.167147635187707	259.289479762528	0.503303571428571	4.34046184309766	0.00388141334479	12.4843	-0.4110714	0.46857143	0.197354497	0.193709677	0.141428571	0.5525	NO	NO	NO	NO	NO	B	B	-1.25383435353762	-1.15509631334953	1.12742841595237	-3.67343601823979	0.517506875897867	0.578294869998776	1.17123633816269	-3.6948168852093	-0.09873804018809	4.80086443419216
AL2G32180	AT1G72490	OG0006150	.	protein_coding	hypothetical protein	.	unknown protein%3B BEST Arabidopsis thaliana protein match is: unknown protein (TAIR:AT1G17400.1)%3B Has 75 Blast hits to 75 proteins in 21 species: Archae - 0%3B Bacteria - 0%3B Metazoa - 3%3B Fungi - 4%3B Plants - 58%3B Viruses - 0%3B Other Eukaryotes - 10 (source: NCBI BLink).	.	unknown protein%3B BEST Arabidopsis thaliana protein match is: unknown protein (TAIR:AT1G17400.1)%3B Has 75 Blast hits to 75 proteins in 21 species: Archae - 0%3B Bacteria - 0%3B Metazoa - 3%3B Fungi - 4%3B Plants - 58%3B Viruses - 0%3B Other Eukaryotes - 10 (source: NCBI BLink).	scaffold_2	15429457	15431547	2091	-	scaffold_2	15430331	15430592	262	*	0.320432475364888	-0.167147635187707	259.289479762528	0.503303571428571	4.34046184309766	0.00388141334479	12.4843	-0.4110714	0.46857143	0.197354497	0.193709677	0.141428571	0.5525	NO	NO	NO	NO	NO	B	B	-1.25383435353762	-1.15509631334953	1.12742841595237	-3.67343601823979	0.517506875897867	0.578294869998776	1.17123633816269	-3.6948168852093	-0.09873804018809	4.80086443419216
AL2G32250	AT1G72560	OG0006155	PSD	protein_coding	ARM repeat superfamily protein	PAUSED	PAUSED (PSD)%3B CONTAINS InterPro DOMAIN/s: Exportin-1/Importin-beta-like (InterPro:IPR013598)%2C Armadillo-type fold (InterPro:IPR016024)%3B Has 688 Blast hits to 667 proteins in 200 species: Archae - 0%3B Bacteria - 0%3B Metazoa - 237%3B Fungi - 267%3B Plants - 76%3B Viruses - 0%3B Other Eukaryotes - 108 (source: NCBI BLink).	Encodes a karyopherin%2C specifically the Arabidopsis ortholog of LOS1/XPOT%2C a protein that mediates nuclear export of tRs in yeast and mammals. PSD is capable of rescuing the tR export defect of los1 in S. cerevisiae. psd mutants display disrupted initiation of the shoot apical meristem and delay leaf initiation after germination%3B they also display delayed transition from vegetative to repro…	PAUSED (PSD)%3B CONTAINS InterPro DOMAIN/s: Exportin-1/Importin-beta-like (InterPro:IPR013598)%2C Armadillo-type fold (InterPro:IPR016024)%3B Has 688 Blast hits to 667 proteins in 200 species: Archae - 0%3B Bacteria - 0%3B Metazoa - 237%3B Fungi - 267%3B Plants - 76%3B Viruses - 0%3B Other Eukaryotes - 108 (source: NCBI BLink).	scaffold_2	15482866	15488267	5402	-	scaffold_2	15484387	15484657	271	*	0.127596267742079	0.0786301621228408	240.674221667575	0.419553571428571	1.45942256403015	0.0471318350571	6.2142	0.2228571	0.30071429	0.381904762	0.253387097	0.392857143	0.17	NO	NO	NO	NO	NO	C	B	-1.52465116271602	0.0948321943783828	-0.847145932656954	1.3400827770467	0.246690066719466	1.82822337772669	-0.803338010446632	1.31870191007719	-1.6194833570944	-2.18722870970365
AL2G32250	AT1G72560	OG0006155	PSD	protein_coding	ARM repeat superfamily protein	PAUSED	PAUSED (PSD)%3B CONTAINS InterPro DOMAIN/s: Exportin-1/Importin-beta-like (InterPro:IPR013598)%2C Armadillo-type fold (InterPro:IPR016024)%3B Has 688 Blast hits to 667 proteins in 200 species: Archae - 0%3B Bacteria - 0%3B Metazoa - 237%3B Fungi - 267%3B Plants - 76%3B Viruses - 0%3B Other Eukaryotes - 108 (source: NCBI BLink).	Encodes a karyopherin%2C specifically the Arabidopsis ortholog of LOS1/XPOT%2C a protein that mediates nuclear export of tRs in yeast and mammals. PSD is capable of rescuing the tR export defect of los1 in S. cerevisiae. psd mutants display disrupted initiation of the shoot apical meristem and delay leaf initiation after germination%3B they also display delayed transition from vegetative to repro…	PAUSED (PSD)%3B CONTAINS InterPro DOMAIN/s: Exportin-1/Importin-beta-like (InterPro:IPR013598)%2C Armadillo-type fold (InterPro:IPR016024)%3B Has 688 Blast hits to 667 proteins in 200 species: Archae - 0%3B Bacteria - 0%3B Metazoa - 237%3B Fungi - 267%3B Plants - 76%3B Viruses - 0%3B Other Eukaryotes - 108 (source: NCBI BLink).	scaffold_2	15482866	15488267	5402	-	scaffold_2	15484387	15484657	271	*	0.127596267742079	0.0786301621228408	240.674221667575	0.419553571428571	1.45942256403015	0.0471318350571	6.2142	0.2228571	0.30071429	0.381904762	0.253387097	0.392857143	0.17	NO	MODERATE	NO	NO	NO	C	B	-1.52465116271602	0.0948321943783828	-0.847145932656954	1.3400827770467	0.246690066719466	1.82822337772669	-0.803338010446632	1.31870191007719	-1.6194833570944	-2.18722870970365
AL2G39390	AT1G78970	OG0000146	.	.	lupeol synthase 1	.	.	Lupeol synthase. Converts oxidosqualene to multiple triterpene alcohols and a triterpene diols. This conversion proceeds through the formation of a 17%26	.	scaffold_2	18411999	18416538	4540	-	scaffold_2	18411791	18412416	626	*	0.249802757919919	0.0589707328383116	219.150322856718	0.361875	3.23958521281248	0.0344816646354	7.5245	0.2110714	0.35071429	0.39037037	0.037096774	0.378571429	0.1675	NO	NO	NO	0.0357142857142857	0.21875	C	B	2.20009047396902	-3.2302788237701	-0.127544276106343	0.541027208124441	3.97143170340451	-1.49688764042179	-0.0837363538960213	0.519646341154934	5.43036929773912	-0.668571484230784
AL2G39390	AT1G78970	OG0000146	.	.	lupeol synthase 1	.	.	Lupeol synthase. Converts oxidosqualene to multiple triterpene alcohols and a triterpene diols. This conversion proceeds through the formation of a 17%26	.	scaffold_2	18411999	18416538	4540	-	scaffold_2	18411791	18412416	626	*	0.249802757919919	0.0589707328383116	219.150322856718	0.361875	3.23958521281248	0.0344816646354	7.5245	0.2110714	0.35071429	0.39037037	0.037096774	0.378571429	0.1675	NO	NO	NO	0.0357142857142857	0.21875	C	B	2.20009047396902	-3.2302788237701	-0.127544276106343	0.541027208124441	3.97143170340451	-1.49688764042179	-0.0837363538960213	0.519646341154934	5.43036929773912	-0.668571484230784
AL2G39390	AT1G78970	OG0000146	.	.	lupeol synthase 1	.	.	Lupeol synthase. Converts oxidosqualene to multiple triterpene alcohols and a triterpene diols. This conversion proceeds through the formation of a 17%26	.	scaffold_2	18411999	18416538	4540	-	scaffold_2	18411791	18412416	626	*	0.249802757919919	0.0589707328383116	219.150322856718	0.361875	3.23958521281248	0.0344816646354	7.5245	0.2110714	0.35071429	0.39037037	0.037096774	0.378571429	0.1675	NO	NO	NO	0.0357142857142857	0.21875	C	B	2.20009047396902	-3.2302788237701	-0.127544276106343	0.541027208124441	3.97143170340451	-1.49688764042179	-0.0837363538960213	0.519646341154934	5.43036929773912	-0.668571484230784
AL2G39390	AT1G78970	OG0000146	.	.	lupeol synthase 1	.	.	Lupeol synthase. Converts oxidosqualene to multiple triterpene alcohols and a triterpene diols. This conversion proceeds through the formation of a 17%26	.	scaffold_2	18411999	18416538	4540	-	scaffold_2	18411791	18412416	626	*	0.249802757919919	0.0589707328383116	219.150322856718	0.361875	3.23958521281248	0.0344816646354	7.5245	0.2110714	0.35071429	0.39037037	0.037096774	0.378571429	0.1675	NO	NO	NO	0.0357142857142857	0.21875	C	B	2.20009047396902	-3.2302788237701	-0.127544276106343	0.541027208124441	3.97143170340451	-1.49688764042179	-0.0837363538960213	0.519646341154934	5.43036929773912	-0.668571484230784
AL2G39390	AT1G78970	OG0000146	.	.	lupeol synthase 1	.	.	Lupeol synthase. Converts oxidosqualene to multiple triterpene alcohols and a triterpene diols. This conversion proceeds through the formation of a 17%26	.	scaffold_2	18411999	18416538	4540	-	scaffold_2	18411791	18412416	626	*	0.249802757919919	0.0589707328383116	219.150322856718	0.361875	3.23958521281248	0.0344816646354	7.5245	0.2110714	0.35071429	0.39037037	0.037096774	0.378571429	0.1675	NO	NO	NO	0.0357142857142857	0.21875	C	B	2.20009047396902	-3.2302788237701	-0.127544276106343	0.541027208124441	3.97143170340451	-1.49688764042179	-0.0837363538960213	0.519646341154934	5.43036929773912	-0.668571484230784
AL2G39390	AT1G78970	OG0000146	.	.	lupeol synthase 1	.	.	Lupeol synthase. Converts oxidosqualene to multiple triterpene alcohols and a triterpene diols. This conversion proceeds through the formation of a 17%26	.	scaffold_2	18411999	18416538	4540	-	scaffold_2	18411791	18412416	626	*	0.249802757919919	0.0589707328383116	219.150322856718	0.361875	3.23958521281248	0.0344816646354	7.5245	0.2110714	0.35071429	0.39037037	0.037096774	0.378571429	0.1675	NO	NO	NO	0.0357142857142857	0.21875	C	B	2.20009047396902	-3.2302788237701	-0.127544276106343	0.541027208124441	3.97143170340451	-1.49688764042179	-0.0837363538960213	0.519646341154934	5.43036929773912	-0.668571484230784
AL2G39390	AT1G78970	OG0000146	.	.	lupeol synthase 1	.	.	Lupeol synthase. Converts oxidosqualene to multiple triterpene alcohols and a triterpene diols. This conversion proceeds through the formation of a 17%26	.	scaffold_2	18411999	18416538	4540	-	scaffold_2	18411791	18412416	626	*	0.249802757919919	0.0589707328383116	219.150322856718	0.361875	3.23958521281248	0.0344816646354	7.5245	0.2110714	0.35071429	0.39037037	0.037096774	0.378571429	0.1675	NO	NO	NO	0.0357142857142857	0.21875	C	B	2.20009047396902	-3.2302788237701	-0.127544276106343	0.541027208124441	3.97143170340451	-1.49688764042179	-0.0837363538960213	0.519646341154934	5.43036929773912	-0.668571484230784
AL2G39390	AT1G78970	OG0000146	.	.	lupeol synthase 1	.	.	Lupeol synthase. Converts oxidosqualene to multiple triterpene alcohols and a triterpene diols. This conversion proceeds through the formation of a 17%26	.	scaffold_2	18411999	18416538	4540	-	scaffold_2	18411791	18412416	626	*	0.249802757919919	0.0589707328383116	219.150322856718	0.361875	3.23958521281248	0.0344816646354	7.5245	0.2110714	0.35071429	0.39037037	0.037096774	0.378571429	0.1675	NO	NO	NO	0.0357142857142857	0.21875	C	B	2.20009047396902	-3.2302788237701	-0.127544276106343	0.541027208124441	3.97143170340451	-1.49688764042179	-0.0837363538960213	0.519646341154934	5.43036929773912	-0.668571484230784
AL2G39390	AT1G66960	OG0000146	LUP5	protein_coding	Terpenoid cyclases family protein	.	Terpenoid cyclases family protein%3B CONTAINS InterPro DOMAIN/s: Terpene synthase%2C conserved site (InterPro:IPR002365)%2C Terpenoid cylases/protein prenyltransferase alpha-alpha toroid (InterPro:IPR008930)%2C Squalene cyclase (InterPro:IPR018333)%2C Prenyltransferase/squalene oxidase (InterPro:IPR001330)%3B BEST Arabidopsis thaliana protein match is: lupeol synthase 2 (TAIR:AT1G78960.1)%3B Has …	.	Terpenoid cyclases family protein%3B CONTAINS InterPro DOMAIN/s: Terpene synthase%2C conserved site (InterPro:IPR002365)%2C Terpenoid cylases/protein prenyltransferase alpha-alpha toroid (InterPro:IPR008930)%2C Squalene cyclase (InterPro:IPR018333)%2C Prenyltransferase/squalene oxidase (InterPro:IPR001330)%3B BEST Arabidopsis thaliana protein match is: lupeol synthase 2 (TAIR:AT1G78960.1)%3B Has …	scaffold_2	18411999	18416538	4540	-	scaffold_2	18411791	18412416	626	*	0.249802757919919	0.0589707328383116	219.150322856718	0.361875	3.23958521281248	0.0344816646354	7.5245	0.2110714	0.35071429	0.39037037	0.037096774	0.378571429	0.1675	NO	NO	NO	0.0357142857142857	0.21875	C	B	2.20009047396902	-3.2302788237701	-0.127544276106343	0.541027208124441	3.97143170340451	-1.49688764042179	-0.0837363538960213	0.519646341154934	5.43036929773912	-0.668571484230784
AL2G39390	AT1G66960	OG0000146	LUP5	protein_coding	Terpenoid cyclases family protein	.	Terpenoid cyclases family protein%3B CONTAINS InterPro DOMAIN/s: Terpene synthase%2C conserved site (InterPro:IPR002365)%2C Terpenoid cylases/protein prenyltransferase alpha-alpha toroid (InterPro:IPR008930)%2C Squalene cyclase (InterPro:IPR018333)%2C Prenyltransferase/squalene oxidase (InterPro:IPR001330)%3B BEST Arabidopsis thaliana protein match is: lupeol synthase 2 (TAIR:AT1G78960.1)%3B Has …	.	Terpenoid cyclases family protein%3B CONTAINS InterPro DOMAIN/s: Terpene synthase%2C conserved site (InterPro:IPR002365)%2C Terpenoid cylases/protein prenyltransferase alpha-alpha toroid (InterPro:IPR008930)%2C Squalene cyclase (InterPro:IPR018333)%2C Prenyltransferase/squalene oxidase (InterPro:IPR001330)%3B BEST Arabidopsis thaliana protein match is: lupeol synthase 2 (TAIR:AT1G78960.1)%3B Has …	scaffold_2	18411999	18416538	4540	-	scaffold_2	18411791	18412416	626	*	0.249802757919919	0.0589707328383116	219.150322856718	0.361875	3.23958521281248	0.0344816646354	7.5245	0.2110714	0.35071429	0.39037037	0.037096774	0.378571429	0.1675	NO	NO	NO	0.0357142857142857	0.21875	C	B	2.20009047396902	-3.2302788237701	-0.127544276106343	0.541027208124441	3.97143170340451	-1.49688764042179	-0.0837363538960213	0.519646341154934	5.43036929773912	-0.668571484230784
AL2G39390	AT1G66960	OG0000146	LUP5	protein_coding	Terpenoid cyclases family protein	.	Terpenoid cyclases family protein%3B CONTAINS InterPro DOMAIN/s: Terpene synthase%2C conserved site (InterPro:IPR002365)%2C Terpenoid cylases/protein prenyltransferase alpha-alpha toroid (InterPro:IPR008930)%2C Squalene cyclase (InterPro:IPR018333)%2C Prenyltransferase/squalene oxidase (InterPro:IPR001330)%3B BEST Arabidopsis thaliana protein match is: lupeol synthase 2 (TAIR:AT1G78960.1)%3B Has …	.	Terpenoid cyclases family protein%3B CONTAINS InterPro DOMAIN/s: Terpene synthase%2C conserved site (InterPro:IPR002365)%2C Terpenoid cylases/protein prenyltransferase alpha-alpha toroid (InterPro:IPR008930)%2C Squalene cyclase (InterPro:IPR018333)%2C Prenyltransferase/squalene oxidase (InterPro:IPR001330)%3B BEST Arabidopsis thaliana protein match is: lupeol synthase 2 (TAIR:AT1G78960.1)%3B Has …	scaffold_2	18411999	18416538	4540	-	scaffold_2	18411791	18412416	626	*	0.249802757919919	0.0589707328383116	219.150322856718	0.361875	3.23958521281248	0.0344816646354	7.5245	0.2110714	0.35071429	0.39037037	0.037096774	0.378571429	0.1675	NO	NO	NO	0.0357142857142857	0.21875	C	B	2.20009047396902	-3.2302788237701	-0.127544276106343	0.541027208124441	3.97143170340451	-1.49688764042179	-0.0837363538960213	0.519646341154934	5.43036929773912	-0.668571484230784
AL2G39390	AT1G66960	OG0000146	LUP5	protein_coding	Terpenoid cyclases family protein	.	Terpenoid cyclases family protein%3B CONTAINS InterPro DOMAIN/s: Terpene synthase%2C conserved site (InterPro:IPR002365)%2C Terpenoid cylases/protein prenyltransferase alpha-alpha toroid (InterPro:IPR008930)%2C Squalene cyclase (InterPro:IPR018333)%2C Prenyltransferase/squalene oxidase (InterPro:IPR001330)%3B BEST Arabidopsis thaliana protein match is: lupeol synthase 2 (TAIR:AT1G78960.1)%3B Has …	.	Terpenoid cyclases family protein%3B CONTAINS InterPro DOMAIN/s: Terpene synthase%2C conserved site (InterPro:IPR002365)%2C Terpenoid cylases/protein prenyltransferase alpha-alpha toroid (InterPro:IPR008930)%2C Squalene cyclase (InterPro:IPR018333)%2C Prenyltransferase/squalene oxidase (InterPro:IPR001330)%3B BEST Arabidopsis thaliana protein match is: lupeol synthase 2 (TAIR:AT1G78960.1)%3B Has …	scaffold_2	18411999	18416538	4540	-	scaffold_2	18411791	18412416	626	*	0.249802757919919	0.0589707328383116	219.150322856718	0.361875	3.23958521281248	0.0344816646354	7.5245	0.2110714	0.35071429	0.39037037	0.037096774	0.378571429	0.1675	NO	NO	NO	0.0357142857142857	0.21875	C	B	2.20009047396902	-3.2302788237701	-0.127544276106343	0.541027208124441	3.97143170340451	-1.49688764042179	-0.0837363538960213	0.519646341154934	5.43036929773912	-0.668571484230784
AL2G39390	AT1G66960	OG0000146	LUP5	protein_coding	Terpenoid cyclases family protein	.	Terpenoid cyclases family protein%3B CONTAINS InterPro DOMAIN/s: Terpene synthase%2C conserved site (InterPro:IPR002365)%2C Terpenoid cylases/protein prenyltransferase alpha-alpha toroid (InterPro:IPR008930)%2C Squalene cyclase (InterPro:IPR018333)%2C Prenyltransferase/squalene oxidase (InterPro:IPR001330)%3B BEST Arabidopsis thaliana protein match is: lupeol synthase 2 (TAIR:AT1G78960.1)%3B Has …	.	Terpenoid cyclases family protein%3B CONTAINS InterPro DOMAIN/s: Terpene synthase%2C conserved site (InterPro:IPR002365)%2C Terpenoid cylases/protein prenyltransferase alpha-alpha toroid (InterPro:IPR008930)%2C Squalene cyclase (InterPro:IPR018333)%2C Prenyltransferase/squalene oxidase (InterPro:IPR001330)%3B BEST Arabidopsis thaliana protein match is: lupeol synthase 2 (TAIR:AT1G78960.1)%3B Has …	scaffold_2	18411999	18416538	4540	-	scaffold_2	18411791	18412416	626	*	0.249802757919919	0.0589707328383116	219.150322856718	0.361875	3.23958521281248	0.0344816646354	7.5245	0.2110714	0.35071429	0.39037037	0.037096774	0.378571429	0.1675	NO	NO	NO	0.0357142857142857	0.21875	C	B	2.20009047396902	-3.2302788237701	-0.127544276106343	0.541027208124441	3.97143170340451	-1.49688764042179	-0.0837363538960213	0.519646341154934	5.43036929773912	-0.668571484230784
AL2G39390	AT1G66960	OG0000146	LUP5	protein_coding	Terpenoid cyclases family protein	.	Terpenoid cyclases family protein%3B CONTAINS InterPro DOMAIN/s: Terpene synthase%2C conserved site (InterPro:IPR002365)%2C Terpenoid cylases/protein prenyltransferase alpha-alpha toroid (InterPro:IPR008930)%2C Squalene cyclase (InterPro:IPR018333)%2C Prenyltransferase/squalene oxidase (InterPro:IPR001330)%3B BEST Arabidopsis thaliana protein match is: lupeol synthase 2 (TAIR:AT1G78960.1)%3B Has …	.	Terpenoid cyclases family protein%3B CONTAINS InterPro DOMAIN/s: Terpene synthase%2C conserved site (InterPro:IPR002365)%2C Terpenoid cylases/protein prenyltransferase alpha-alpha toroid (InterPro:IPR008930)%2C Squalene cyclase (InterPro:IPR018333)%2C Prenyltransferase/squalene oxidase (InterPro:IPR001330)%3B BEST Arabidopsis thaliana protein match is: lupeol synthase 2 (TAIR:AT1G78960.1)%3B Has …	scaffold_2	18411999	18416538	4540	-	scaffold_2	18411791	18412416	626	*	0.249802757919919	0.0589707328383116	219.150322856718	0.361875	3.23958521281248	0.0344816646354	7.5245	0.2110714	0.35071429	0.39037037	0.037096774	0.378571429	0.1675	NO	NO	NO	0.0357142857142857	0.21875	C	B	2.20009047396902	-3.2302788237701	-0.127544276106343	0.541027208124441	3.97143170340451	-1.49688764042179	-0.0837363538960213	0.519646341154934	5.43036929773912	-0.668571484230784
AL2G39390	AT1G66960	OG0000146	LUP5	protein_coding	Terpenoid cyclases family protein	.	Terpenoid cyclases family protein%3B CONTAINS InterPro DOMAIN/s: Terpene synthase%2C conserved site (InterPro:IPR002365)%2C Terpenoid cylases/protein prenyltransferase alpha-alpha toroid (InterPro:IPR008930)%2C Squalene cyclase (InterPro:IPR018333)%2C Prenyltransferase/squalene oxidase (InterPro:IPR001330)%3B BEST Arabidopsis thaliana protein match is: lupeol synthase 2 (TAIR:AT1G78960.1)%3B Has …	.	Terpenoid cyclases family protein%3B CONTAINS InterPro DOMAIN/s: Terpene synthase%2C conserved site (InterPro:IPR002365)%2C Terpenoid cylases/protein prenyltransferase alpha-alpha toroid (InterPro:IPR008930)%2C Squalene cyclase (InterPro:IPR018333)%2C Prenyltransferase/squalene oxidase (InterPro:IPR001330)%3B BEST Arabidopsis thaliana protein match is: lupeol synthase 2 (TAIR:AT1G78960.1)%3B Has …	scaffold_2	18411999	18416538	4540	-	scaffold_2	18411791	18412416	626	*	0.249802757919919	0.0589707328383116	219.150322856718	0.361875	3.23958521281248	0.0344816646354	7.5245	0.2110714	0.35071429	0.39037037	0.037096774	0.378571429	0.1675	NO	NO	NO	0.0357142857142857	0.21875	C	B	2.20009047396902	-3.2302788237701	-0.127544276106343	0.541027208124441	3.97143170340451	-1.49688764042179	-0.0837363538960213	0.519646341154934	5.43036929773912	-0.668571484230784
AL2G39390	AT1G66960	OG0000146	LUP5	protein_coding	Terpenoid cyclases family protein	.	Terpenoid cyclases family protein%3B CONTAINS InterPro DOMAIN/s: Terpene synthase%2C conserved site (InterPro:IPR002365)%2C Terpenoid cylases/protein prenyltransferase alpha-alpha toroid (InterPro:IPR008930)%2C Squalene cyclase (InterPro:IPR018333)%2C Prenyltransferase/squalene oxidase (InterPro:IPR001330)%3B BEST Arabidopsis thaliana protein match is: lupeol synthase 2 (TAIR:AT1G78960.1)%3B Has …	.	Terpenoid cyclases family protein%3B CONTAINS InterPro DOMAIN/s: Terpene synthase%2C conserved site (InterPro:IPR002365)%2C Terpenoid cylases/protein prenyltransferase alpha-alpha toroid (InterPro:IPR008930)%2C Squalene cyclase (InterPro:IPR018333)%2C Prenyltransferase/squalene oxidase (InterPro:IPR001330)%3B BEST Arabidopsis thaliana protein match is: lupeol synthase 2 (TAIR:AT1G78960.1)%3B Has …	scaffold_2	18411999	18416538	4540	-	scaffold_2	18411791	18412416	626	*	0.249802757919919	0.0589707328383116	219.150322856718	0.361875	3.23958521281248	0.0344816646354	7.5245	0.2110714	0.35071429	0.39037037	0.037096774	0.378571429	0.1675	NO	NO	NO	0.0357142857142857	0.21875	C	B	2.20009047396902	-3.2302788237701	-0.127544276106343	0.541027208124441	3.97143170340451	-1.49688764042179	-0.0837363538960213	0.519646341154934	5.43036929773912	-0.668571484230784
AL2G39390	AT1G78960	OG0000146	LUP2	protein_coding	lupeol synthase 2	lupeol synthase 2	lupeol synthase 2 (LUP2)%3B CONTAINS InterPro DOMAIN/s: Terpene synthase%2C conserved site (InterPro:IPR002365)%2C Terpenoid cylases/protein prenyltransferase alpha-alpha toroid (InterPro:IPR008930)%2C Squalene cyclase (InterPro:IPR018333)%2C Prenyltransferase/squalene oxidase (InterPro:IPR001330)%3B BEST Arabidopsis thaliana protein match is: Terpenoid cyclases family protein (TAIR:AT1G66960.1)%…	Encodes a multifunctional 2-3-oxidosqualene (OS)-triterpene cyclase that can cyclize OS into lupeol%2C alpha- and beta-amyrin.	lupeol synthase 2 (LUP2)%3B CONTAINS InterPro DOMAIN/s: Terpene synthase%2C conserved site (InterPro:IPR002365)%2C Terpenoid cylases/protein prenyltransferase alpha-alpha toroid (InterPro:IPR008930)%2C Squalene cyclase (InterPro:IPR018333)%2C Prenyltransferase/squalene oxidase (InterPro:IPR001330)%3B BEST Arabidopsis thaliana protein match is: Terpenoid cyclases family protein (TAIR:AT1G66960.1)%…	scaffold_2	18411999	18416538	4540	-	scaffold_2	18411791	18412416	626	*	0.249802757919919	0.0589707328383116	219.150322856718	0.361875	3.23958521281248	0.0344816646354	7.5245	0.2110714	0.35071429	0.39037037	0.037096774	0.378571429	0.1675	NO	NO	NO	0.0357142857142857	0.21875	C	B	2.20009047396902	-3.2302788237701	-0.127544276106343	0.541027208124441	3.97143170340451	-1.49688764042179	-0.0837363538960213	0.519646341154934	5.43036929773912	-0.668571484230784
AL2G39390	AT1G78960	OG0000146	LUP2	protein_coding	lupeol synthase 2	lupeol synthase 2	lupeol synthase 2 (LUP2)%3B CONTAINS InterPro DOMAIN/s: Terpene synthase%2C conserved site (InterPro:IPR002365)%2C Terpenoid cylases/protein prenyltransferase alpha-alpha toroid (InterPro:IPR008930)%2C Squalene cyclase (InterPro:IPR018333)%2C Prenyltransferase/squalene oxidase (InterPro:IPR001330)%3B BEST Arabidopsis thaliana protein match is: Terpenoid cyclases family protein (TAIR:AT1G66960.1)%…	Encodes a multifunctional 2-3-oxidosqualene (OS)-triterpene cyclase that can cyclize OS into lupeol%2C alpha- and beta-amyrin.	lupeol synthase 2 (LUP2)%3B CONTAINS InterPro DOMAIN/s: Terpene synthase%2C conserved site (InterPro:IPR002365)%2C Terpenoid cylases/protein prenyltransferase alpha-alpha toroid (InterPro:IPR008930)%2C Squalene cyclase (InterPro:IPR018333)%2C Prenyltransferase/squalene oxidase (InterPro:IPR001330)%3B BEST Arabidopsis thaliana protein match is: Terpenoid cyclases family protein (TAIR:AT1G66960.1)%…	scaffold_2	18411999	18416538	4540	-	scaffold_2	18411791	18412416	626	*	0.249802757919919	0.0589707328383116	219.150322856718	0.361875	3.23958521281248	0.0344816646354	7.5245	0.2110714	0.35071429	0.39037037	0.037096774	0.378571429	0.1675	NO	NO	NO	0.0357142857142857	0.21875	C	B	2.20009047396902	-3.2302788237701	-0.127544276106343	0.541027208124441	3.97143170340451	-1.49688764042179	-0.0837363538960213	0.519646341154934	5.43036929773912	-0.668571484230784
AL2G39390	AT1G78960	OG0000146	LUP2	protein_coding	lupeol synthase 2	lupeol synthase 2	lupeol synthase 2 (LUP2)%3B CONTAINS InterPro DOMAIN/s: Terpene synthase%2C conserved site (InterPro:IPR002365)%2C Terpenoid cylases/protein prenyltransferase alpha-alpha toroid (InterPro:IPR008930)%2C Squalene cyclase (InterPro:IPR018333)%2C Prenyltransferase/squalene oxidase (InterPro:IPR001330)%3B BEST Arabidopsis thaliana protein match is: Terpenoid cyclases family protein (TAIR:AT1G66960.1)%…	Encodes a multifunctional 2-3-oxidosqualene (OS)-triterpene cyclase that can cyclize OS into lupeol%2C alpha- and beta-amyrin.	lupeol synthase 2 (LUP2)%3B CONTAINS InterPro DOMAIN/s: Terpene synthase%2C conserved site (InterPro:IPR002365)%2C Terpenoid cylases/protein prenyltransferase alpha-alpha toroid (InterPro:IPR008930)%2C Squalene cyclase (InterPro:IPR018333)%2C Prenyltransferase/squalene oxidase (InterPro:IPR001330)%3B BEST Arabidopsis thaliana protein match is: Terpenoid cyclases family protein (TAIR:AT1G66960.1)%…	scaffold_2	18411999	18416538	4540	-	scaffold_2	18411791	18412416	626	*	0.249802757919919	0.0589707328383116	219.150322856718	0.361875	3.23958521281248	0.0344816646354	7.5245	0.2110714	0.35071429	0.39037037	0.037096774	0.378571429	0.1675	NO	NO	NO	0.0357142857142857	0.21875	C	B	2.20009047396902	-3.2302788237701	-0.127544276106343	0.541027208124441	3.97143170340451	-1.49688764042179	-0.0837363538960213	0.519646341154934	5.43036929773912	-0.668571484230784
AL2G39390	AT1G78960	OG0000146	LUP2	protein_coding	lupeol synthase 2	lupeol synthase 2	lupeol synthase 2 (LUP2)%3B CONTAINS InterPro DOMAIN/s: Terpene synthase%2C conserved site (InterPro:IPR002365)%2C Terpenoid cylases/protein prenyltransferase alpha-alpha toroid (InterPro:IPR008930)%2C Squalene cyclase (InterPro:IPR018333)%2C Prenyltransferase/squalene oxidase (InterPro:IPR001330)%3B BEST Arabidopsis thaliana protein match is: Terpenoid cyclases family protein (TAIR:AT1G66960.1)%…	Encodes a multifunctional 2-3-oxidosqualene (OS)-triterpene cyclase that can cyclize OS into lupeol%2C alpha- and beta-amyrin.	lupeol synthase 2 (LUP2)%3B CONTAINS InterPro DOMAIN/s: Terpene synthase%2C conserved site (InterPro:IPR002365)%2C Terpenoid cylases/protein prenyltransferase alpha-alpha toroid (InterPro:IPR008930)%2C Squalene cyclase (InterPro:IPR018333)%2C Prenyltransferase/squalene oxidase (InterPro:IPR001330)%3B BEST Arabidopsis thaliana protein match is: Terpenoid cyclases family protein (TAIR:AT1G66960.1)%…	scaffold_2	18411999	18416538	4540	-	scaffold_2	18411791	18412416	626	*	0.249802757919919	0.0589707328383116	219.150322856718	0.361875	3.23958521281248	0.0344816646354	7.5245	0.2110714	0.35071429	0.39037037	0.037096774	0.378571429	0.1675	NO	NO	NO	0.0357142857142857	0.21875	C	B	2.20009047396902	-3.2302788237701	-0.127544276106343	0.541027208124441	3.97143170340451	-1.49688764042179	-0.0837363538960213	0.519646341154934	5.43036929773912	-0.668571484230784
AL2G39390	AT1G78960	OG0000146	LUP2	protein_coding	lupeol synthase 2	lupeol synthase 2	lupeol synthase 2 (LUP2)%3B CONTAINS InterPro DOMAIN/s: Terpene synthase%2C conserved site (InterPro:IPR002365)%2C Terpenoid cylases/protein prenyltransferase alpha-alpha toroid (InterPro:IPR008930)%2C Squalene cyclase (InterPro:IPR018333)%2C Prenyltransferase/squalene oxidase (InterPro:IPR001330)%3B BEST Arabidopsis thaliana protein match is: Terpenoid cyclases family protein (TAIR:AT1G66960.1)%…	Encodes a multifunctional 2-3-oxidosqualene (OS)-triterpene cyclase that can cyclize OS into lupeol%2C alpha- and beta-amyrin.	lupeol synthase 2 (LUP2)%3B CONTAINS InterPro DOMAIN/s: Terpene synthase%2C conserved site (InterPro:IPR002365)%2C Terpenoid cylases/protein prenyltransferase alpha-alpha toroid (InterPro:IPR008930)%2C Squalene cyclase (InterPro:IPR018333)%2C Prenyltransferase/squalene oxidase (InterPro:IPR001330)%3B BEST Arabidopsis thaliana protein match is: Terpenoid cyclases family protein (TAIR:AT1G66960.1)%…	scaffold_2	18411999	18416538	4540	-	scaffold_2	18411791	18412416	626	*	0.249802757919919	0.0589707328383116	219.150322856718	0.361875	3.23958521281248	0.0344816646354	7.5245	0.2110714	0.35071429	0.39037037	0.037096774	0.378571429	0.1675	NO	NO	NO	0.0357142857142857	0.21875	C	B	2.20009047396902	-3.2302788237701	-0.127544276106343	0.541027208124441	3.97143170340451	-1.49688764042179	-0.0837363538960213	0.519646341154934	5.43036929773912	-0.668571484230784
AL2G39390	AT1G78960	OG0000146	LUP2	protein_coding	lupeol synthase 2	lupeol synthase 2	lupeol synthase 2 (LUP2)%3B CONTAINS InterPro DOMAIN/s: Terpene synthase%2C conserved site (InterPro:IPR002365)%2C Terpenoid cylases/protein prenyltransferase alpha-alpha toroid (InterPro:IPR008930)%2C Squalene cyclase (InterPro:IPR018333)%2C Prenyltransferase/squalene oxidase (InterPro:IPR001330)%3B BEST Arabidopsis thaliana protein match is: Terpenoid cyclases family protein (TAIR:AT1G66960.1)%…	Encodes a multifunctional 2-3-oxidosqualene (OS)-triterpene cyclase that can cyclize OS into lupeol%2C alpha- and beta-amyrin.	lupeol synthase 2 (LUP2)%3B CONTAINS InterPro DOMAIN/s: Terpene synthase%2C conserved site (InterPro:IPR002365)%2C Terpenoid cylases/protein prenyltransferase alpha-alpha toroid (InterPro:IPR008930)%2C Squalene cyclase (InterPro:IPR018333)%2C Prenyltransferase/squalene oxidase (InterPro:IPR001330)%3B BEST Arabidopsis thaliana protein match is: Terpenoid cyclases family protein (TAIR:AT1G66960.1)%…	scaffold_2	18411999	18416538	4540	-	scaffold_2	18411791	18412416	626	*	0.249802757919919	0.0589707328383116	219.150322856718	0.361875	3.23958521281248	0.0344816646354	7.5245	0.2110714	0.35071429	0.39037037	0.037096774	0.378571429	0.1675	NO	NO	NO	0.0357142857142857	0.21875	C	B	2.20009047396902	-3.2302788237701	-0.127544276106343	0.541027208124441	3.97143170340451	-1.49688764042179	-0.0837363538960213	0.519646341154934	5.43036929773912	-0.668571484230784
AL2G39390	AT1G78960	OG0000146	LUP2	protein_coding	lupeol synthase 2	lupeol synthase 2	lupeol synthase 2 (LUP2)%3B CONTAINS InterPro DOMAIN/s: Terpene synthase%2C conserved site (InterPro:IPR002365)%2C Terpenoid cylases/protein prenyltransferase alpha-alpha toroid (InterPro:IPR008930)%2C Squalene cyclase (InterPro:IPR018333)%2C Prenyltransferase/squalene oxidase (InterPro:IPR001330)%3B BEST Arabidopsis thaliana protein match is: Terpenoid cyclases family protein (TAIR:AT1G66960.1)%…	Encodes a multifunctional 2-3-oxidosqualene (OS)-triterpene cyclase that can cyclize OS into lupeol%2C alpha- and beta-amyrin.	lupeol synthase 2 (LUP2)%3B CONTAINS InterPro DOMAIN/s: Terpene synthase%2C conserved site (InterPro:IPR002365)%2C Terpenoid cylases/protein prenyltransferase alpha-alpha toroid (InterPro:IPR008930)%2C Squalene cyclase (InterPro:IPR018333)%2C Prenyltransferase/squalene oxidase (InterPro:IPR001330)%3B BEST Arabidopsis thaliana protein match is: Terpenoid cyclases family protein (TAIR:AT1G66960.1)%…	scaffold_2	18411999	18416538	4540	-	scaffold_2	18411791	18412416	626	*	0.249802757919919	0.0589707328383116	219.150322856718	0.361875	3.23958521281248	0.0344816646354	7.5245	0.2110714	0.35071429	0.39037037	0.037096774	0.378571429	0.1675	NO	NO	NO	0.0357142857142857	0.21875	C	B	2.20009047396902	-3.2302788237701	-0.127544276106343	0.541027208124441	3.97143170340451	-1.49688764042179	-0.0837363538960213	0.519646341154934	5.43036929773912	-0.668571484230784
AL2G39390	AT1G78960	OG0000146	LUP2	protein_coding	lupeol synthase 2	lupeol synthase 2	lupeol synthase 2 (LUP2)%3B CONTAINS InterPro DOMAIN/s: Terpene synthase%2C conserved site (InterPro:IPR002365)%2C Terpenoid cylases/protein prenyltransferase alpha-alpha toroid (InterPro:IPR008930)%2C Squalene cyclase (InterPro:IPR018333)%2C Prenyltransferase/squalene oxidase (InterPro:IPR001330)%3B BEST Arabidopsis thaliana protein match is: Terpenoid cyclases family protein (TAIR:AT1G66960.1)%…	Encodes a multifunctional 2-3-oxidosqualene (OS)-triterpene cyclase that can cyclize OS into lupeol%2C alpha- and beta-amyrin.	lupeol synthase 2 (LUP2)%3B CONTAINS InterPro DOMAIN/s: Terpene synthase%2C conserved site (InterPro:IPR002365)%2C Terpenoid cylases/protein prenyltransferase alpha-alpha toroid (InterPro:IPR008930)%2C Squalene cyclase (InterPro:IPR018333)%2C Prenyltransferase/squalene oxidase (InterPro:IPR001330)%3B BEST Arabidopsis thaliana protein match is: Terpenoid cyclases family protein (TAIR:AT1G66960.1)%…	scaffold_2	18411999	18416538	4540	-	scaffold_2	18411791	18412416	626	*	0.249802757919919	0.0589707328383116	219.150322856718	0.361875	3.23958521281248	0.0344816646354	7.5245	0.2110714	0.35071429	0.39037037	0.037096774	0.378571429	0.1675	NO	NO	NO	0.0357142857142857	0.21875	C	B	2.20009047396902	-3.2302788237701	-0.127544276106343	0.541027208124441	3.97143170340451	-1.49688764042179	-0.0837363538960213	0.519646341154934	5.43036929773912	-0.668571484230784
AL2G39390	AT1G78950	OG0000146	BAS	protein_coding	Terpenoid cyclases family protein	beta-amyrin synthase	Terpenoid cyclases family protein%3B CONTAINS InterPro DOMAIN/s: Terpene synthase%2C conserved site (InterPro:IPR002365)%2C Squalene cyclase (InterPro:IPR018333)%2C Terpenoid cylases/protein prenyltransferase alpha-alpha toroid (InterPro:IPR008930)%2C Prenyltransferase/squalene oxidase (InterPro:IPR001330)%3B BEST Arabidopsis thaliana protein match is: camelliol C synthase 1 (TAIR:AT1G78955.1)%3B…	.	Terpenoid cyclases family protein%3B CONTAINS InterPro DOMAIN/s: Terpene synthase%2C conserved site (InterPro:IPR002365)%2C Squalene cyclase (InterPro:IPR018333)%2C Terpenoid cylases/protein prenyltransferase alpha-alpha toroid (InterPro:IPR008930)%2C Prenyltransferase/squalene oxidase (InterPro:IPR001330)%3B BEST Arabidopsis thaliana protein match is: camelliol C synthase 1 (TAIR:AT1G78955.1)%3B…	scaffold_2	18411999	18416538	4540	-	scaffold_2	18411791	18412416	626	*	0.249802757919919	0.0589707328383116	219.150322856718	0.361875	3.23958521281248	0.0344816646354	7.5245	0.2110714	0.35071429	0.39037037	0.037096774	0.378571429	0.1675	NO	NO	NO	0.0357142857142857	0.21875	C	B	2.20009047396902	-3.2302788237701	-0.127544276106343	0.541027208124441	3.97143170340451	-1.49688764042179	-0.0837363538960213	0.519646341154934	5.43036929773912	-0.668571484230784
AL2G39390	AT1G78950	OG0000146	BAS	protein_coding	Terpenoid cyclases family protein	beta-amyrin synthase	Terpenoid cyclases family protein%3B CONTAINS InterPro DOMAIN/s: Terpene synthase%2C conserved site (InterPro:IPR002365)%2C Squalene cyclase (InterPro:IPR018333)%2C Terpenoid cylases/protein prenyltransferase alpha-alpha toroid (InterPro:IPR008930)%2C Prenyltransferase/squalene oxidase (InterPro:IPR001330)%3B BEST Arabidopsis thaliana protein match is: camelliol C synthase 1 (TAIR:AT1G78955.1)%3B…	.	Terpenoid cyclases family protein%3B CONTAINS InterPro DOMAIN/s: Terpene synthase%2C conserved site (InterPro:IPR002365)%2C Squalene cyclase (InterPro:IPR018333)%2C Terpenoid cylases/protein prenyltransferase alpha-alpha toroid (InterPro:IPR008930)%2C Prenyltransferase/squalene oxidase (InterPro:IPR001330)%3B BEST Arabidopsis thaliana protein match is: camelliol C synthase 1 (TAIR:AT1G78955.1)%3B…	scaffold_2	18411999	18416538	4540	-	scaffold_2	18411791	18412416	626	*	0.249802757919919	0.0589707328383116	219.150322856718	0.361875	3.23958521281248	0.0344816646354	7.5245	0.2110714	0.35071429	0.39037037	0.037096774	0.378571429	0.1675	NO	NO	NO	0.0357142857142857	0.21875	C	B	2.20009047396902	-3.2302788237701	-0.127544276106343	0.541027208124441	3.97143170340451	-1.49688764042179	-0.0837363538960213	0.519646341154934	5.43036929773912	-0.668571484230784
AL2G39390	AT1G78950	OG0000146	BAS	protein_coding	Terpenoid cyclases family protein	beta-amyrin synthase	Terpenoid cyclases family protein%3B CONTAINS InterPro DOMAIN/s: Terpene synthase%2C conserved site (InterPro:IPR002365)%2C Squalene cyclase (InterPro:IPR018333)%2C Terpenoid cylases/protein prenyltransferase alpha-alpha toroid (InterPro:IPR008930)%2C Prenyltransferase/squalene oxidase (InterPro:IPR001330)%3B BEST Arabidopsis thaliana protein match is: camelliol C synthase 1 (TAIR:AT1G78955.1)%3B…	.	Terpenoid cyclases family protein%3B CONTAINS InterPro DOMAIN/s: Terpene synthase%2C conserved site (InterPro:IPR002365)%2C Squalene cyclase (InterPro:IPR018333)%2C Terpenoid cylases/protein prenyltransferase alpha-alpha toroid (InterPro:IPR008930)%2C Prenyltransferase/squalene oxidase (InterPro:IPR001330)%3B BEST Arabidopsis thaliana protein match is: camelliol C synthase 1 (TAIR:AT1G78955.1)%3B…	scaffold_2	18411999	18416538	4540	-	scaffold_2	18411791	18412416	626	*	0.249802757919919	0.0589707328383116	219.150322856718	0.361875	3.23958521281248	0.0344816646354	7.5245	0.2110714	0.35071429	0.39037037	0.037096774	0.378571429	0.1675	NO	NO	NO	0.0357142857142857	0.21875	C	B	2.20009047396902	-3.2302788237701	-0.127544276106343	0.541027208124441	3.97143170340451	-1.49688764042179	-0.0837363538960213	0.519646341154934	5.43036929773912	-0.668571484230784
AL2G39390	AT1G78950	OG0000146	BAS	protein_coding	Terpenoid cyclases family protein	beta-amyrin synthase	Terpenoid cyclases family protein%3B CONTAINS InterPro DOMAIN/s: Terpene synthase%2C conserved site (InterPro:IPR002365)%2C Squalene cyclase (InterPro:IPR018333)%2C Terpenoid cylases/protein prenyltransferase alpha-alpha toroid (InterPro:IPR008930)%2C Prenyltransferase/squalene oxidase (InterPro:IPR001330)%3B BEST Arabidopsis thaliana protein match is: camelliol C synthase 1 (TAIR:AT1G78955.1)%3B…	.	Terpenoid cyclases family protein%3B CONTAINS InterPro DOMAIN/s: Terpene synthase%2C conserved site (InterPro:IPR002365)%2C Squalene cyclase (InterPro:IPR018333)%2C Terpenoid cylases/protein prenyltransferase alpha-alpha toroid (InterPro:IPR008930)%2C Prenyltransferase/squalene oxidase (InterPro:IPR001330)%3B BEST Arabidopsis thaliana protein match is: camelliol C synthase 1 (TAIR:AT1G78955.1)%3B…	scaffold_2	18411999	18416538	4540	-	scaffold_2	18411791	18412416	626	*	0.249802757919919	0.0589707328383116	219.150322856718	0.361875	3.23958521281248	0.0344816646354	7.5245	0.2110714	0.35071429	0.39037037	0.037096774	0.378571429	0.1675	NO	NO	NO	0.0357142857142857	0.21875	C	B	2.20009047396902	-3.2302788237701	-0.127544276106343	0.541027208124441	3.97143170340451	-1.49688764042179	-0.0837363538960213	0.519646341154934	5.43036929773912	-0.668571484230784
AL2G39390	AT1G78950	OG0000146	BAS	protein_coding	Terpenoid cyclases family protein	beta-amyrin synthase	Terpenoid cyclases family protein%3B CONTAINS InterPro DOMAIN/s: Terpene synthase%2C conserved site (InterPro:IPR002365)%2C Squalene cyclase (InterPro:IPR018333)%2C Terpenoid cylases/protein prenyltransferase alpha-alpha toroid (InterPro:IPR008930)%2C Prenyltransferase/squalene oxidase (InterPro:IPR001330)%3B BEST Arabidopsis thaliana protein match is: camelliol C synthase 1 (TAIR:AT1G78955.1)%3B…	.	Terpenoid cyclases family protein%3B CONTAINS InterPro DOMAIN/s: Terpene synthase%2C conserved site (InterPro:IPR002365)%2C Squalene cyclase (InterPro:IPR018333)%2C Terpenoid cylases/protein prenyltransferase alpha-alpha toroid (InterPro:IPR008930)%2C Prenyltransferase/squalene oxidase (InterPro:IPR001330)%3B BEST Arabidopsis thaliana protein match is: camelliol C synthase 1 (TAIR:AT1G78955.1)%3B…	scaffold_2	18411999	18416538	4540	-	scaffold_2	18411791	18412416	626	*	0.249802757919919	0.0589707328383116	219.150322856718	0.361875	3.23958521281248	0.0344816646354	7.5245	0.2110714	0.35071429	0.39037037	0.037096774	0.378571429	0.1675	NO	NO	NO	0.0357142857142857	0.21875	C	B	2.20009047396902	-3.2302788237701	-0.127544276106343	0.541027208124441	3.97143170340451	-1.49688764042179	-0.0837363538960213	0.519646341154934	5.43036929773912	-0.668571484230784
AL2G39390	AT1G78950	OG0000146	BAS	protein_coding	Terpenoid cyclases family protein	beta-amyrin synthase	Terpenoid cyclases family protein%3B CONTAINS InterPro DOMAIN/s: Terpene synthase%2C conserved site (InterPro:IPR002365)%2C Squalene cyclase (InterPro:IPR018333)%2C Terpenoid cylases/protein prenyltransferase alpha-alpha toroid (InterPro:IPR008930)%2C Prenyltransferase/squalene oxidase (InterPro:IPR001330)%3B BEST Arabidopsis thaliana protein match is: camelliol C synthase 1 (TAIR:AT1G78955.1)%3B…	.	Terpenoid cyclases family protein%3B CONTAINS InterPro DOMAIN/s: Terpene synthase%2C conserved site (InterPro:IPR002365)%2C Squalene cyclase (InterPro:IPR018333)%2C Terpenoid cylases/protein prenyltransferase alpha-alpha toroid (InterPro:IPR008930)%2C Prenyltransferase/squalene oxidase (InterPro:IPR001330)%3B BEST Arabidopsis thaliana protein match is: camelliol C synthase 1 (TAIR:AT1G78955.1)%3B…	scaffold_2	18411999	18416538	4540	-	scaffold_2	18411791	18412416	626	*	0.249802757919919	0.0589707328383116	219.150322856718	0.361875	3.23958521281248	0.0344816646354	7.5245	0.2110714	0.35071429	0.39037037	0.037096774	0.378571429	0.1675	NO	NO	NO	0.0357142857142857	0.21875	C	B	2.20009047396902	-3.2302788237701	-0.127544276106343	0.541027208124441	3.97143170340451	-1.49688764042179	-0.0837363538960213	0.519646341154934	5.43036929773912	-0.668571484230784
AL2G39390	AT1G78950	OG0000146	BAS	protein_coding	Terpenoid cyclases family protein	beta-amyrin synthase	Terpenoid cyclases family protein%3B CONTAINS InterPro DOMAIN/s: Terpene synthase%2C conserved site (InterPro:IPR002365)%2C Squalene cyclase (InterPro:IPR018333)%2C Terpenoid cylases/protein prenyltransferase alpha-alpha toroid (InterPro:IPR008930)%2C Prenyltransferase/squalene oxidase (InterPro:IPR001330)%3B BEST Arabidopsis thaliana protein match is: camelliol C synthase 1 (TAIR:AT1G78955.1)%3B…	.	Terpenoid cyclases family protein%3B CONTAINS InterPro DOMAIN/s: Terpene synthase%2C conserved site (InterPro:IPR002365)%2C Squalene cyclase (InterPro:IPR018333)%2C Terpenoid cylases/protein prenyltransferase alpha-alpha toroid (InterPro:IPR008930)%2C Prenyltransferase/squalene oxidase (InterPro:IPR001330)%3B BEST Arabidopsis thaliana protein match is: camelliol C synthase 1 (TAIR:AT1G78955.1)%3B…	scaffold_2	18411999	18416538	4540	-	scaffold_2	18411791	18412416	626	*	0.249802757919919	0.0589707328383116	219.150322856718	0.361875	3.23958521281248	0.0344816646354	7.5245	0.2110714	0.35071429	0.39037037	0.037096774	0.378571429	0.1675	NO	NO	NO	0.0357142857142857	0.21875	C	B	2.20009047396902	-3.2302788237701	-0.127544276106343	0.541027208124441	3.97143170340451	-1.49688764042179	-0.0837363538960213	0.519646341154934	5.43036929773912	-0.668571484230784
AL2G39390	AT1G78950	OG0000146	BAS	protein_coding	Terpenoid cyclases family protein	beta-amyrin synthase	Terpenoid cyclases family protein%3B CONTAINS InterPro DOMAIN/s: Terpene synthase%2C conserved site (InterPro:IPR002365)%2C Squalene cyclase (InterPro:IPR018333)%2C Terpenoid cylases/protein prenyltransferase alpha-alpha toroid (InterPro:IPR008930)%2C Prenyltransferase/squalene oxidase (InterPro:IPR001330)%3B BEST Arabidopsis thaliana protein match is: camelliol C synthase 1 (TAIR:AT1G78955.1)%3B…	.	Terpenoid cyclases family protein%3B CONTAINS InterPro DOMAIN/s: Terpene synthase%2C conserved site (InterPro:IPR002365)%2C Squalene cyclase (InterPro:IPR018333)%2C Terpenoid cylases/protein prenyltransferase alpha-alpha toroid (InterPro:IPR008930)%2C Prenyltransferase/squalene oxidase (InterPro:IPR001330)%3B BEST Arabidopsis thaliana protein match is: camelliol C synthase 1 (TAIR:AT1G78955.1)%3B…	scaffold_2	18411999	18416538	4540	-	scaffold_2	18411791	18412416	626	*	0.249802757919919	0.0589707328383116	219.150322856718	0.361875	3.23958521281248	0.0344816646354	7.5245	0.2110714	0.35071429	0.39037037	0.037096774	0.378571429	0.1675	NO	NO	NO	0.0357142857142857	0.21875	C	B	2.20009047396902	-3.2302788237701	-0.127544276106343	0.541027208124441	3.97143170340451	-1.49688764042179	-0.0837363538960213	0.519646341154934	5.43036929773912	-0.668571484230784
AL2G39920	AT1G79320	OG0004619	MC6	protein_coding	metacaspase 6	metacaspase 6	metacaspase 6 (MC6)%3B FUNCTIONS IN: cysteine-type endopeptidase activity%3B INVOLVED IN: proteolysis%3B LOCATED IN: cellular_component unknown%3B EXPRESSED IN: stem%2C root%3B CONTAINS InterPro DOMAIN/s: Peptidase C14%2C caspase catalytic (InterPro:IPR011600)%3B BEST Arabidopsis thaliana protein match is: metacaspase 5 (TAIR:AT1G79330.1)%3B Has 1177 Blast hits to 1175 proteins in 293 species: Ar…	Encodes a putative metacaspase. Arabidopsis contains three type I MCP genes (MCP1a-c) and six type II MCP genes (MCP2a%E2%80%93f): AtMCP1a/At5g64240%2C AtMCP1b/At1g02170%2C AtMCP1c/At4g25110%2C AtMCP2a/At1g79310%2C AtMCP2b/At1g79330%2C AtMCP2c/At1g79320%2C AtMCP2d/At1g79340%2C AtMCP2e/At1g16420%2C AtMCP2f/At5g04200.	metacaspase 6 (MC6)%3B FUNCTIONS IN: cysteine-type endopeptidase activity%3B INVOLVED IN: proteolysis%3B LOCATED IN: cellular_component unknown%3B EXPRESSED IN: stem%2C root%3B CONTAINS InterPro DOMAIN/s: Peptidase C14%2C caspase catalytic (InterPro:IPR011600)%3B BEST Arabidopsis thaliana protein match is: metacaspase 5 (TAIR:AT1G79330.1)%3B Has 1177 Blast hits to 1175 proteins in 293 species: Ar…	scaffold_2	18613156	18614680	1525	+	scaffold_2	18614222	18614427	206	*	0.125776323255571	-0.10072470962951	155.844890350407	0.258392857142857	4.07261654373114	0.00350216332827	1.5544	-0.1182143	0.19821429	0.104338624	0.299677419	0.114285714	0.2325	NO	NO	NO	NO	NO	C	B	-2.73120067823472	0.959240584060092	0.351140414465614	1.07095642223607	-0.959859448799233	2.6926317674084	0.394948336675936	1.04957555526656	-3.69044126229481	-0.719816007770456
[truncated: 791 more rows]
[truncated: 31 more columns]

## Sheet: High_effect_SNPs
Gene_description															High_effect_SNPs									Metal_homeostasis_gene_list													Number_of_copies
AL_ID	AT_ID	OrthoGroup.x	symbol	locus_type	note	full_name	description	curator_summary	computational_description	Scaffold	Gene_start	Gene_end	Gene_size	Gene_strand	Scaffold	Position	Base	Characterization	Effect	Allele_Frequency_Mias	Allele_Frequency_Zapa	Allele_Frequency_Mias-Allele_Frequency_Zapa	UnifiedGenotyper_Allele_Frequency_difference	ID	Name	Function	Localisation	EC.TC	Comment	BINCODE	BIN	EvidenceCode	Annotator...Curator	metal.1	metal.2	metal.3	Thaliana_paralogue_number	Halleri_paralogue_number	Lyrata_paralogue_number
[truncated: 160 more rows]

## Sheet: Indels
Gene_description										Indels_HaplotypeCaller									Indels_GROM												Metal_homeostasis_gene_list
[truncated: 39 more rows]
