# Supplementary material for: Convergent evolution in Arabidopsis halleri and Arabidopsis arenosa on calamine metalliferous soils
Source: Philos Trans R Soc Lond B Biol Sci. 2019 Jun 3;374(1777):20180243. doi: 10.1098/rstb.2018.0243 (PMC6560266; doi:10.1098/rstb.2018.0243)
Supplement: Dataset S5 [file rstb20180243supp16.xlsx]

## Sheet: Classical_genome_scans
Dataset S5. Candidate genes Klet vs. Kowa in Arabidopsis arenosa. Gene_description															Genome_scans
AL_ID	AT_ID	OrthoGroup	symbol	locus_type	note	full_name	description	curator_summary	computational_description	Scaffold	Gene_start	Gene_end	Gene_size	Gene_strand	Scaffold	Window_start	Window_end	Window_width	Window_strand	Fst	DD	Nielsen	Dxy	Flk	Flk_pvalue	VarLD	Allele_Frequency_Difference	Absolue_Allele_Frequency_Difference	Pi_Klet	Pi_Kowa	Allele_Frequency_Klet	Allele_Frequency_Kowa	MODIFIER_effect_SNP_in_window	MODERATE_effect_SNP_in_window	HIGH_effect_SNP_in_window	Allele_Frequency_HIGH_effect_SNP_in_gene_Klet	Allele_Frequency_HIGH_effect_SNP_in_gene_Kowa	Allele_Frequency_Plot	Metrics_Plot	TajimasD_Klet_nearest_window	TajimasD_Kowa_nearest_window	FayandWusH_Klet_nearest_window	FayandWusH_Kowa_nearest_window	TajimasD_Klet_nearest_window_standardized	TajimasD_Kowa_nearest_window_standardized	FayandWusH_Klet_nearest_window_standardized	FayandWusH_Kowa_nearest_window_standardized	TajimasD_difference_nearest_windows_Klet-Kowa	FayandWusH_difference_nearest_windows_Klet-Kowa
AL1G11250	AT1G01225	OG0000891	.	protein_coding	NC domain-containing protein-like protein	.	NC domain-containing protein-related%3B CONTAINS InterPro DOMAIN/s: NC (InterPro:IPR007053)%3B BEST Arabidopsis thaliana protein match is: NC domain-containing protein-related (TAIR:AT4G00905.1)%3B Has 173 Blast hits to 172 proteins in 34 species: Archae - 0%3B Bacteria - 24%3B Metazoa - 5%3B Fungi - 0%3B Plants - 139%3B Viruses - 0%3B Other Eukaryotes - 5 (source: NCBI BLink).	.	NC domain-containing protein-related%3B CONTAINS InterPro DOMAIN/s: NC (InterPro:IPR007053)%3B BEST Arabidopsis thaliana protein match is: NC domain-containing protein-related (TAIR:AT4G00905.1)%3B Has 173 Blast hits to 172 proteins in 34 species: Archae - 0%3B Bacteria - 24%3B Metazoa - 5%3B Fungi - 0%3B Plants - 139%3B Viruses - 0%3B Other Eukaryotes - 5 (source: NCBI BLink).	scaffold_1	430172	431595	1424	-	scaffold_1	431111	431363	253	*	0.128044908935284	-0.153003013624105	185.533160936899	0.235	2.58011588411022	0.00670700074643	3.9043	-0.0983333333333333	0.2075	0.082031746031746	0.225645161290323	0.226666666666667	0.325	NO	NO	NO	NO	NO	C	B	-2.34642509830332	-0.115974693122905	-0.944674964516578	-0.833676779167872	-1.70279239163879	0.659596286219146	-0.666415188160216	-0.602312029596239	-2.23045040518042	-0.110998185348706
AL1G11250	AT1G01225	OG0000891	.	protein_coding	NC domain-containing protein-like protein	.	NC domain-containing protein-related%3B CONTAINS InterPro DOMAIN/s: NC (InterPro:IPR007053)%3B BEST Arabidopsis thaliana protein match is: NC domain-containing protein-related (TAIR:AT4G00905.1)%3B Has 173 Blast hits to 172 proteins in 34 species: Archae - 0%3B Bacteria - 24%3B Metazoa - 5%3B Fungi - 0%3B Plants - 139%3B Viruses - 0%3B Other Eukaryotes - 5 (source: NCBI BLink).	.	NC domain-containing protein-related%3B CONTAINS InterPro DOMAIN/s: NC (InterPro:IPR007053)%3B BEST Arabidopsis thaliana protein match is: NC domain-containing protein-related (TAIR:AT4G00905.1)%3B Has 173 Blast hits to 172 proteins in 34 species: Archae - 0%3B Bacteria - 24%3B Metazoa - 5%3B Fungi - 0%3B Plants - 139%3B Viruses - 0%3B Other Eukaryotes - 5 (source: NCBI BLink).	scaffold_1	430172	431595	1424	-	scaffold_1	431111	431363	253	*	0.128044908935284	-0.153003013624105	185.533160936899	0.235	2.58011588411022	0.00670700074643	3.9043	-0.0983333333333333	0.2075	0.082031746031746	0.225645161290323	0.226666666666667	0.325	NO	NO	NO	NO	NO	C	B	-2.34642509830332	-0.115974693122905	-0.944674964516578	-0.833676779167872	-1.70279239163879	0.659596286219146	-0.666415188160216	-0.602312029596239	-2.23045040518042	-0.110998185348706
AL1G11250	AT4G00905	OG0000891	.	protein_coding	NC domain-containing protein-like protein	.	NC domain-containing protein-related%3B CONTAINS InterPro DOMAIN/s: NC (InterPro:IPR007053)%3B BEST Arabidopsis thaliana protein match is: NC domain-containing protein-related (TAIR:AT1G01225.1)%3B Has 30201 Blast hits to 17322 proteins in 780 species: Archae - 12%3B Bacteria - 1396%3B Metazoa - 17338%3B Fungi - 3422%3B Plants - 5037%3B Viruses - 0%3B Other Eukaryotes - 2996 (source: NCBI BLink).	.	NC domain-containing protein-related%3B CONTAINS InterPro DOMAIN/s: NC (InterPro:IPR007053)%3B BEST Arabidopsis thaliana protein match is: NC domain-containing protein-related (TAIR:AT1G01225.1)%3B Has 30201 Blast hits to 17322 proteins in 780 species: Archae - 12%3B Bacteria - 1396%3B Metazoa - 17338%3B Fungi - 3422%3B Plants - 5037%3B Viruses - 0%3B Other Eukaryotes - 2996 (source: NCBI BLink).	scaffold_1	430172	431595	1424	-	scaffold_1	431111	431363	253	*	0.128044908935284	-0.153003013624105	185.533160936899	0.235	2.58011588411022	0.00670700074643	3.9043	-0.0983333333333333	0.2075	0.082031746031746	0.225645161290323	0.226666666666667	0.325	NO	NO	NO	NO	NO	C	B	-2.34642509830332	-0.115974693122905	-0.944674964516578	-0.833676779167872	-1.70279239163879	0.659596286219146	-0.666415188160216	-0.602312029596239	-2.23045040518042	-0.110998185348706
AL1G11250	AT4G00905	OG0000891	.	protein_coding	NC domain-containing protein-like protein	.	NC domain-containing protein-related%3B CONTAINS InterPro DOMAIN/s: NC (InterPro:IPR007053)%3B BEST Arabidopsis thaliana protein match is: NC domain-containing protein-related (TAIR:AT1G01225.1)%3B Has 30201 Blast hits to 17322 proteins in 780 species: Archae - 12%3B Bacteria - 1396%3B Metazoa - 17338%3B Fungi - 3422%3B Plants - 5037%3B Viruses - 0%3B Other Eukaryotes - 2996 (source: NCBI BLink).	.	NC domain-containing protein-related%3B CONTAINS InterPro DOMAIN/s: NC (InterPro:IPR007053)%3B BEST Arabidopsis thaliana protein match is: NC domain-containing protein-related (TAIR:AT1G01225.1)%3B Has 30201 Blast hits to 17322 proteins in 780 species: Archae - 12%3B Bacteria - 1396%3B Metazoa - 17338%3B Fungi - 3422%3B Plants - 5037%3B Viruses - 0%3B Other Eukaryotes - 2996 (source: NCBI BLink).	scaffold_1	430172	431595	1424	-	scaffold_1	431111	431363	253	*	0.128044908935284	-0.153003013624105	185.533160936899	0.235	2.58011588411022	0.00670700074643	3.9043	-0.0983333333333333	0.2075	0.082031746031746	0.225645161290323	0.226666666666667	0.325	NO	NO	NO	NO	NO	C	B	-2.34642509830332	-0.115974693122905	-0.944674964516578	-0.833676779167872	-1.70279239163879	0.659596286219146	-0.666415188160216	-0.602312029596239	-2.23045040518042	-0.110998185348706
AL1G13030	AT4G03340	OG0001829	.	protein_coding	Core-2/I-branching beta-1%2C6-N-acetylglucosaminyltransferase family protein	.	Core-2/I-branching beta-1%2C6-N-acetylglucosaminyltransferase family protein%3B FUNCTIONS IN: transferase activity%2C transferring glycosyl groups%2C acetylglucosaminyltransferase activity%3B INVOLVED IN: carbohydrate biosynthetic process%3B LOCATED IN: mitochondrion%2C membrane%3B EXPRESSED IN: 9 plant structures%3B EXPRESSED DURING: petal differentiation and expansion stage%2C E expanded cotyle…	.	Core-2/I-branching beta-1%2C6-N-acetylglucosaminyltransferase family protein%3B FUNCTIONS IN: transferase activity%2C transferring glycosyl groups%2C acetylglucosaminyltransferase activity%3B INVOLVED IN: carbohydrate biosynthetic process%3B LOCATED IN: mitochondrion%2C membrane%3B EXPRESSED IN: 9 plant structures%3B EXPRESSED DURING: petal differentiation and expansion stage%2C E expanded cotyle…	scaffold_1	1039755	1042079	2325	-	scaffold_1	1041477	1041718	242	*	0.150983978187428	-0.167876891034934	216.898538626076	0.305208333333333	2.81770521241922	0.0203899753394	21.02	0.130833333333333	0.2575	0.0897142857142857	0.324838709677419	0.383333333333333	0.2525	NO	NO	NO	NO	NO	C	A	-2.59554770037106	0.0422448660101259	-3.93889038295265	-0.0594020309480832	-1.95191499370653	0.817815845352177	-3.66063060659629	0.17196271862355	-2.63779256638119	-3.87948835200457
AL1G13030	AT4G03340	OG0001829	.	protein_coding	Core-2/I-branching beta-1%2C6-N-acetylglucosaminyltransferase family protein	.	Core-2/I-branching beta-1%2C6-N-acetylglucosaminyltransferase family protein%3B FUNCTIONS IN: transferase activity%2C transferring glycosyl groups%2C acetylglucosaminyltransferase activity%3B INVOLVED IN: carbohydrate biosynthetic process%3B LOCATED IN: mitochondrion%2C membrane%3B EXPRESSED IN: 9 plant structures%3B EXPRESSED DURING: petal differentiation and expansion stage%2C E expanded cotyle…	.	Core-2/I-branching beta-1%2C6-N-acetylglucosaminyltransferase family protein%3B FUNCTIONS IN: transferase activity%2C transferring glycosyl groups%2C acetylglucosaminyltransferase activity%3B INVOLVED IN: carbohydrate biosynthetic process%3B LOCATED IN: mitochondrion%2C membrane%3B EXPRESSED IN: 9 plant structures%3B EXPRESSED DURING: petal differentiation and expansion stage%2C E expanded cotyle…	scaffold_1	1039755	1042079	2325	-	scaffold_1	1041477	1041718	242	*	0.150983978187428	-0.167876891034934	216.898538626076	0.305208333333333	2.81770521241922	0.0203899753394	21.02	0.130833333333333	0.2575	0.0897142857142857	0.324838709677419	0.383333333333333	0.2525	NO	NO	NO	NO	NO	C	A	-2.59554770037106	0.0422448660101259	-3.93889038295265	-0.0594020309480832	-1.95191499370653	0.817815845352177	-3.66063060659629	0.17196271862355	-2.63779256638119	-3.87948835200457
AL1G13030	AT1G03520	OG0001829	.	protein_coding	Core-2/I-branching beta-1%2C6-N-acetylglucosaminyltransferase family protein	.	Core-2/I-branching beta-1%2C6-N-acetylglucosaminyltransferase family protein%3B FUNCTIONS IN: transferase activity%2C transferring glycosyl groups%2C acetylglucosaminyltransferase activity%3B INVOLVED IN: carbohydrate biosynthetic process%3B LOCATED IN: membrane%3B EXPRESSED IN: 22 plant structures%3B EXPRESSED DURING: 13 growth stages%3B CONTAINS InterPro DOMAIN/s: Glycosyl transferase%2C family…	.	Core-2/I-branching beta-1%2C6-N-acetylglucosaminyltransferase family protein%3B FUNCTIONS IN: transferase activity%2C transferring glycosyl groups%2C acetylglucosaminyltransferase activity%3B INVOLVED IN: carbohydrate biosynthetic process%3B LOCATED IN: membrane%3B EXPRESSED IN: 22 plant structures%3B EXPRESSED DURING: 13 growth stages%3B CONTAINS InterPro DOMAIN/s: Glycosyl transferase%2C family…	scaffold_1	1039755	1042079	2325	-	scaffold_1	1041477	1041718	242	*	0.150983978187428	-0.167876891034934	216.898538626076	0.305208333333333	2.81770521241922	0.0203899753394	21.02	0.130833333333333	0.2575	0.0897142857142857	0.324838709677419	0.383333333333333	0.2525	NO	NO	NO	NO	NO	C	A	-2.59554770037106	0.0422448660101259	-3.93889038295265	-0.0594020309480832	-1.95191499370653	0.817815845352177	-3.66063060659629	0.17196271862355	-2.63779256638119	-3.87948835200457
AL1G13030	AT1G03520	OG0001829	.	protein_coding	Core-2/I-branching beta-1%2C6-N-acetylglucosaminyltransferase family protein	.	Core-2/I-branching beta-1%2C6-N-acetylglucosaminyltransferase family protein%3B FUNCTIONS IN: transferase activity%2C transferring glycosyl groups%2C acetylglucosaminyltransferase activity%3B INVOLVED IN: carbohydrate biosynthetic process%3B LOCATED IN: membrane%3B EXPRESSED IN: 22 plant structures%3B EXPRESSED DURING: 13 growth stages%3B CONTAINS InterPro DOMAIN/s: Glycosyl transferase%2C family…	.	Core-2/I-branching beta-1%2C6-N-acetylglucosaminyltransferase family protein%3B FUNCTIONS IN: transferase activity%2C transferring glycosyl groups%2C acetylglucosaminyltransferase activity%3B INVOLVED IN: carbohydrate biosynthetic process%3B LOCATED IN: membrane%3B EXPRESSED IN: 22 plant structures%3B EXPRESSED DURING: 13 growth stages%3B CONTAINS InterPro DOMAIN/s: Glycosyl transferase%2C family…	scaffold_1	1039755	1042079	2325	-	scaffold_1	1041477	1041718	242	*	0.150983978187428	-0.167876891034934	216.898538626076	0.305208333333333	2.81770521241922	0.0203899753394	21.02	0.130833333333333	0.2575	0.0897142857142857	0.324838709677419	0.383333333333333	0.2525	NO	NO	NO	NO	NO	C	A	-2.59554770037106	0.0422448660101259	-3.93889038295265	-0.0594020309480832	-1.95191499370653	0.817815845352177	-3.66063060659629	0.17196271862355	-2.63779256638119	-3.87948835200457
AL1G14600	AT1G04880	OG0005012	.	protein_coding	HMG (high mobility group) box protein with ARID/BRIGHT D-binding domain-containing protein	.	HMG (high mobility group) box protein with ARID/BRIGHT D-binding domain%3B FUNCTIONS IN: sequence-specific D binding transcription factor activity%3B INVOLVED IN: regulation of transcription%3B LOCATED IN: intracellular%2C nucleus%3B EXPRESSED IN: 10 plant structures%3B EXPRESSED DURING: 7 growth stages%3B CONTAINS InterPro DOMAIN/s: High mobility group%2C superfamily (InterPro:IPR009071)%2C High…	.	HMG (high mobility group) box protein with ARID/BRIGHT D-binding domain%3B FUNCTIONS IN: sequence-specific D binding transcription factor activity%3B INVOLVED IN: regulation of transcription%3B LOCATED IN: intracellular%2C nucleus%3B EXPRESSED IN: 10 plant structures%3B EXPRESSED DURING: 7 growth stages%3B CONTAINS InterPro DOMAIN/s: High mobility group%2C superfamily (InterPro:IPR009071)%2C High…	scaffold_1	1661459	1664883	3425	-	scaffold_1	1663214	1663558	345	*	0.149751468911749	0.0272703817321283	230.706036297319	0.361805555555556	2.9418159860857	0.0134814066274	18.1678	0.212222222222222	0.297777777777778	0.326031746031746	0.156935483870968	0.372222222222222	0.16	NO	NO	NO	NO	NO	C	B	0.851403211875245	-1.88366907791961	-0.474583143822114	0.264236620424217	1.49503591853978	-1.10809809857756	-0.196323367465752	0.49560136999585	2.73507228979485	-0.738819764246331
AL1G19430	AT1G09000	OG0014169	NP1	protein_coding	NPK1-related protein kinase 1	NPK1-related protein kinase 1	NPK1-related protein kinase 1 (NP1)%3B CONTAINS InterPro DOMAIN/s: Protein kinase%2C ATP binding site (InterPro:IPR017441)%2C Serine/threonine-protein kinase domain (InterPro:IPR002290)%2C Serine/threonine-protein kinase-like domain (InterPro:IPR017442)%2C Serine/threonine-protein kinase%2C active site (InterPro:IPR008271)%2C Protein kinase-like domain (InterPro:IPR011009)%2C Mitogen activated pr…	NPK1-related protein kinase 1S	NPK1-related protein kinase 1 (NP1)%3B CONTAINS InterPro DOMAIN/s: Protein kinase%2C ATP binding site (InterPro:IPR017441)%2C Serine/threonine-protein kinase domain (InterPro:IPR002290)%2C Serine/threonine-protein kinase-like domain (InterPro:IPR017442)%2C Serine/threonine-protein kinase%2C active site (InterPro:IPR008271)%2C Protein kinase-like domain (InterPro:IPR011009)%2C Mitogen activated pr…	scaffold_1	3418783	3423139	4357	+	scaffold_1	3420991	3421339	349	*	0.153258095334462	-0.0994911841561514	253.258829299604	0.379930555555556	2.83528641011092	7.0556554138E-4	12.5073	0.212361111111111	0.302916666666667	0.18768253968254	0.325564516129032	0.491111111111111	0.27875	NO	NO	NO	0.0277777777777778	0.09375	C	B	-1.47902549292203	1.17160516740802	-1.77257552771415	-0.194592860002332	-0.835392786257498	1.94717614675007	-1.49431575135779	0.0367718895693012	-2.65063066033005	-1.57798266771182
AL1G20180	AT1G09640	OG0001725	.	protein_coding	Translation elongation factor EF1B%2C gamma chain	.	Translation elongation factor EF1B%2C gamma chain%3B FUNCTIONS IN: translation elongation factor activity%3B INVOLVED IN: translational elongation%3B LOCATED IN: plasma membrane%3B EXPRESSED IN: male gametophyte%2C cultured cell%2C pollen tube%2C leaf%2C seed%3B EXPRESSED DURING: L mature pollen stage%2C M germinated pollen stage%2C seed development stages%3B CONTAINS InterPro DOMAIN/s: Thioredox…	.	Translation elongation factor EF1B%2C gamma chain%3B FUNCTIONS IN: translation elongation factor activity%3B INVOLVED IN: translational elongation%3B LOCATED IN: plasma membrane%3B EXPRESSED IN: male gametophyte%2C cultured cell%2C pollen tube%2C leaf%2C seed%3B EXPRESSED DURING: L mature pollen stage%2C M germinated pollen stage%2C seed development stages%3B CONTAINS InterPro DOMAIN/s: Thioredox…	scaffold_1	3671165	3673749	2585	+	scaffold_1	3673112	3673677	566	*	0.186008702437181	0.00736125519658623	250.390741919097	0.377152777777778	2.56903636152644	8.96767265329E-4	8.1939	0.0156944444444444	0.315138888888889	0.31231746031746	0.147661290322581	0.354444444444444	0.33875	NO	NO	NO	NO	NO	B	B	0.771004553935195	-1.27670611400408	-1.13405908973266	-0.574561023480561	1.41463726059973	-0.501135134662029	-0.855799313376298	-0.343196273908928	2.04771066793927	-0.559498066252099
AL1G20180	AT1G09640	OG0001725	.	protein_coding	Translation elongation factor EF1B%2C gamma chain	.	Translation elongation factor EF1B%2C gamma chain%3B FUNCTIONS IN: translation elongation factor activity%3B INVOLVED IN: translational elongation%3B LOCATED IN: plasma membrane%3B EXPRESSED IN: male gametophyte%2C cultured cell%2C pollen tube%2C leaf%2C seed%3B EXPRESSED DURING: L mature pollen stage%2C M germinated pollen stage%2C seed development stages%3B CONTAINS InterPro DOMAIN/s: Thioredox…	.	Translation elongation factor EF1B%2C gamma chain%3B FUNCTIONS IN: translation elongation factor activity%3B INVOLVED IN: translational elongation%3B LOCATED IN: plasma membrane%3B EXPRESSED IN: male gametophyte%2C cultured cell%2C pollen tube%2C leaf%2C seed%3B EXPRESSED DURING: L mature pollen stage%2C M germinated pollen stage%2C seed development stages%3B CONTAINS InterPro DOMAIN/s: Thioredox…	scaffold_1	3671165	3673749	2585	+	scaffold_1	3673112	3673677	566	*	0.186008702437181	0.00736125519658623	250.390741919097	0.377152777777778	2.56903636152644	8.96767265329E-4	8.1939	0.0156944444444444	0.315138888888889	0.31231746031746	0.147661290322581	0.354444444444444	0.33875	NO	NO	NO	NO	NO	C	B	0.771004553935195	-1.27670611400408	-1.13405908973266	-0.574561023480561	1.41463726059973	-0.501135134662029	-0.855799313376298	-0.343196273908928	2.04771066793927	-0.559498066252099
AL1G20180	AT1G09640	OG0001725	.	protein_coding	Translation elongation factor EF1B%2C gamma chain	.	Translation elongation factor EF1B%2C gamma chain%3B FUNCTIONS IN: translation elongation factor activity%3B INVOLVED IN: translational elongation%3B LOCATED IN: plasma membrane%3B EXPRESSED IN: male gametophyte%2C cultured cell%2C pollen tube%2C leaf%2C seed%3B EXPRESSED DURING: L mature pollen stage%2C M germinated pollen stage%2C seed development stages%3B CONTAINS InterPro DOMAIN/s: Thioredox…	.	Translation elongation factor EF1B%2C gamma chain%3B FUNCTIONS IN: translation elongation factor activity%3B INVOLVED IN: translational elongation%3B LOCATED IN: plasma membrane%3B EXPRESSED IN: male gametophyte%2C cultured cell%2C pollen tube%2C leaf%2C seed%3B EXPRESSED DURING: L mature pollen stage%2C M germinated pollen stage%2C seed development stages%3B CONTAINS InterPro DOMAIN/s: Thioredox…	scaffold_1	3671165	3673749	2585	+	scaffold_1	3673112	3673677	566	*	0.186008702437181	0.00736125519658623	250.390741919097	0.377152777777778	2.56903636152644	8.96767265329E-4	8.1939	0.0156944444444444	0.315138888888889	0.31231746031746	0.147661290322581	0.354444444444444	0.33875	NO	NO	NO	NO	NO	C	B	0.771004553935195	-1.27670611400408	-1.13405908973266	-0.574561023480561	1.41463726059973	-0.501135134662029	-0.855799313376298	-0.343196273908928	2.04771066793927	-0.559498066252099
AL1G20180	AT1G09640	OG0001725	.	protein_coding	Translation elongation factor EF1B%2C gamma chain	.	Translation elongation factor EF1B%2C gamma chain%3B FUNCTIONS IN: translation elongation factor activity%3B INVOLVED IN: translational elongation%3B LOCATED IN: plasma membrane%3B EXPRESSED IN: male gametophyte%2C cultured cell%2C pollen tube%2C leaf%2C seed%3B EXPRESSED DURING: L mature pollen stage%2C M germinated pollen stage%2C seed development stages%3B CONTAINS InterPro DOMAIN/s: Thioredox…	.	Translation elongation factor EF1B%2C gamma chain%3B FUNCTIONS IN: translation elongation factor activity%3B INVOLVED IN: translational elongation%3B LOCATED IN: plasma membrane%3B EXPRESSED IN: male gametophyte%2C cultured cell%2C pollen tube%2C leaf%2C seed%3B EXPRESSED DURING: L mature pollen stage%2C M germinated pollen stage%2C seed development stages%3B CONTAINS InterPro DOMAIN/s: Thioredox…	scaffold_1	3671165	3673749	2585	+	scaffold_1	3673112	3673677	566	*	0.186008702437181	0.00736125519658623	250.390741919097	0.377152777777778	2.56903636152644	8.96767265329E-4	8.1939	0.0156944444444444	0.315138888888889	0.31231746031746	0.147661290322581	0.354444444444444	0.33875	NO	MODERATE	NO	NO	NO	C	B	0.771004553935195	-1.27670611400408	-1.13405908973266	-0.574561023480561	1.41463726059973	-0.501135134662029	-0.855799313376298	-0.343196273908928	2.04771066793927	-0.559498066252099
AL1G20180	AT1G09640	OG0001725	.	protein_coding	Translation elongation factor EF1B%2C gamma chain	.	Translation elongation factor EF1B%2C gamma chain%3B FUNCTIONS IN: translation elongation factor activity%3B INVOLVED IN: translational elongation%3B LOCATED IN: plasma membrane%3B EXPRESSED IN: male gametophyte%2C cultured cell%2C pollen tube%2C leaf%2C seed%3B EXPRESSED DURING: L mature pollen stage%2C M germinated pollen stage%2C seed development stages%3B CONTAINS InterPro DOMAIN/s: Thioredox…	.	Translation elongation factor EF1B%2C gamma chain%3B FUNCTIONS IN: translation elongation factor activity%3B INVOLVED IN: translational elongation%3B LOCATED IN: plasma membrane%3B EXPRESSED IN: male gametophyte%2C cultured cell%2C pollen tube%2C leaf%2C seed%3B EXPRESSED DURING: L mature pollen stage%2C M germinated pollen stage%2C seed development stages%3B CONTAINS InterPro DOMAIN/s: Thioredox…	scaffold_1	3671165	3673749	2585	+	scaffold_1	3673112	3673677	566	*	0.186008702437181	0.00736125519658623	250.390741919097	0.377152777777778	2.56903636152644	8.96767265329E-4	8.1939	0.0156944444444444	0.315138888888889	0.31231746031746	0.147661290322581	0.354444444444444	0.33875	NO	NO	NO	NO	NO	C	B	0.771004553935195	-1.27670611400408	-1.13405908973266	-0.574561023480561	1.41463726059973	-0.501135134662029	-0.855799313376298	-0.343196273908928	2.04771066793927	-0.559498066252099
AL1G20180	AT1G09640	OG0001725	.	protein_coding	Translation elongation factor EF1B%2C gamma chain	.	Translation elongation factor EF1B%2C gamma chain%3B FUNCTIONS IN: translation elongation factor activity%3B INVOLVED IN: translational elongation%3B LOCATED IN: plasma membrane%3B EXPRESSED IN: male gametophyte%2C cultured cell%2C pollen tube%2C leaf%2C seed%3B EXPRESSED DURING: L mature pollen stage%2C M germinated pollen stage%2C seed development stages%3B CONTAINS InterPro DOMAIN/s: Thioredox…	.	Translation elongation factor EF1B%2C gamma chain%3B FUNCTIONS IN: translation elongation factor activity%3B INVOLVED IN: translational elongation%3B LOCATED IN: plasma membrane%3B EXPRESSED IN: male gametophyte%2C cultured cell%2C pollen tube%2C leaf%2C seed%3B EXPRESSED DURING: L mature pollen stage%2C M germinated pollen stage%2C seed development stages%3B CONTAINS InterPro DOMAIN/s: Thioredox…	scaffold_1	3671165	3673749	2585	+	scaffold_1	3673112	3673677	566	*	0.186008702437181	0.00736125519658623	250.390741919097	0.377152777777778	2.56903636152644	8.96767265329E-4	8.1939	0.0156944444444444	0.315138888888889	0.31231746031746	0.147661290322581	0.354444444444444	0.33875	NO	MODERATE	NO	NO	NO	C	B	0.771004553935195	-1.27670611400408	-1.13405908973266	-0.574561023480561	1.41463726059973	-0.501135134662029	-0.855799313376298	-0.343196273908928	2.04771066793927	-0.559498066252099
AL1G20180	AT1G57720	OG0001725	.	protein_coding	Translation elongation factor EF1B%2C gamma chain	.	Translation elongation factor EF1B%2C gamma chain%3B FUNCTIONS IN: copper ion binding%2C translation elongation factor activity%3B INVOLVED IN: response to cadmium ion%2C response to zinc ion%3B LOCATED IN: cell wall%2C plasma membrane%2C vacuole%2C membrane%3B EXPRESSED IN: 6 plant structures%3B EXPRESSED DURING: seedling growth%2C seed development stages%3B CONTAINS InterPro DOMAIN/s: Thioredox…	.	Translation elongation factor EF1B%2C gamma chain%3B FUNCTIONS IN: copper ion binding%2C translation elongation factor activity%3B INVOLVED IN: response to cadmium ion%2C response to zinc ion%3B LOCATED IN: cell wall%2C plasma membrane%2C vacuole%2C membrane%3B EXPRESSED IN: 6 plant structures%3B EXPRESSED DURING: seedling growth%2C seed development stages%3B CONTAINS InterPro DOMAIN/s: Thioredox…	scaffold_1	3671165	3673749	2585	+	scaffold_1	3673112	3673677	566	*	0.186008702437181	0.00736125519658623	250.390741919097	0.377152777777778	2.56903636152644	8.96767265329E-4	8.1939	0.0156944444444444	0.315138888888889	0.31231746031746	0.147661290322581	0.354444444444444	0.33875	NO	NO	NO	NO	NO	B	B	0.771004553935195	-1.27670611400408	-1.13405908973266	-0.574561023480561	1.41463726059973	-0.501135134662029	-0.855799313376298	-0.343196273908928	2.04771066793927	-0.559498066252099
AL1G20180	AT1G57720	OG0001725	.	protein_coding	Translation elongation factor EF1B%2C gamma chain	.	Translation elongation factor EF1B%2C gamma chain%3B FUNCTIONS IN: copper ion binding%2C translation elongation factor activity%3B INVOLVED IN: response to cadmium ion%2C response to zinc ion%3B LOCATED IN: cell wall%2C plasma membrane%2C vacuole%2C membrane%3B EXPRESSED IN: 6 plant structures%3B EXPRESSED DURING: seedling growth%2C seed development stages%3B CONTAINS InterPro DOMAIN/s: Thioredox…	.	Translation elongation factor EF1B%2C gamma chain%3B FUNCTIONS IN: copper ion binding%2C translation elongation factor activity%3B INVOLVED IN: response to cadmium ion%2C response to zinc ion%3B LOCATED IN: cell wall%2C plasma membrane%2C vacuole%2C membrane%3B EXPRESSED IN: 6 plant structures%3B EXPRESSED DURING: seedling growth%2C seed development stages%3B CONTAINS InterPro DOMAIN/s: Thioredox…	scaffold_1	3671165	3673749	2585	+	scaffold_1	3673112	3673677	566	*	0.186008702437181	0.00736125519658623	250.390741919097	0.377152777777778	2.56903636152644	8.96767265329E-4	8.1939	0.0156944444444444	0.315138888888889	0.31231746031746	0.147661290322581	0.354444444444444	0.33875	NO	NO	NO	NO	NO	C	B	0.771004553935195	-1.27670611400408	-1.13405908973266	-0.574561023480561	1.41463726059973	-0.501135134662029	-0.855799313376298	-0.343196273908928	2.04771066793927	-0.559498066252099
AL1G20180	AT1G57720	OG0001725	.	protein_coding	Translation elongation factor EF1B%2C gamma chain	.	Translation elongation factor EF1B%2C gamma chain%3B FUNCTIONS IN: copper ion binding%2C translation elongation factor activity%3B INVOLVED IN: response to cadmium ion%2C response to zinc ion%3B LOCATED IN: cell wall%2C plasma membrane%2C vacuole%2C membrane%3B EXPRESSED IN: 6 plant structures%3B EXPRESSED DURING: seedling growth%2C seed development stages%3B CONTAINS InterPro DOMAIN/s: Thioredox…	.	Translation elongation factor EF1B%2C gamma chain%3B FUNCTIONS IN: copper ion binding%2C translation elongation factor activity%3B INVOLVED IN: response to cadmium ion%2C response to zinc ion%3B LOCATED IN: cell wall%2C plasma membrane%2C vacuole%2C membrane%3B EXPRESSED IN: 6 plant structures%3B EXPRESSED DURING: seedling growth%2C seed development stages%3B CONTAINS InterPro DOMAIN/s: Thioredox…	scaffold_1	3671165	3673749	2585	+	scaffold_1	3673112	3673677	566	*	0.186008702437181	0.00736125519658623	250.390741919097	0.377152777777778	2.56903636152644	8.96767265329E-4	8.1939	0.0156944444444444	0.315138888888889	0.31231746031746	0.147661290322581	0.354444444444444	0.33875	NO	NO	NO	NO	NO	C	B	0.771004553935195	-1.27670611400408	-1.13405908973266	-0.574561023480561	1.41463726059973	-0.501135134662029	-0.855799313376298	-0.343196273908928	2.04771066793927	-0.559498066252099
AL1G20180	AT1G57720	OG0001725	.	protein_coding	Translation elongation factor EF1B%2C gamma chain	.	Translation elongation factor EF1B%2C gamma chain%3B FUNCTIONS IN: copper ion binding%2C translation elongation factor activity%3B INVOLVED IN: response to cadmium ion%2C response to zinc ion%3B LOCATED IN: cell wall%2C plasma membrane%2C vacuole%2C membrane%3B EXPRESSED IN: 6 plant structures%3B EXPRESSED DURING: seedling growth%2C seed development stages%3B CONTAINS InterPro DOMAIN/s: Thioredox…	.	Translation elongation factor EF1B%2C gamma chain%3B FUNCTIONS IN: copper ion binding%2C translation elongation factor activity%3B INVOLVED IN: response to cadmium ion%2C response to zinc ion%3B LOCATED IN: cell wall%2C plasma membrane%2C vacuole%2C membrane%3B EXPRESSED IN: 6 plant structures%3B EXPRESSED DURING: seedling growth%2C seed development stages%3B CONTAINS InterPro DOMAIN/s: Thioredox…	scaffold_1	3671165	3673749	2585	+	scaffold_1	3673112	3673677	566	*	0.186008702437181	0.00736125519658623	250.390741919097	0.377152777777778	2.56903636152644	8.96767265329E-4	8.1939	0.0156944444444444	0.315138888888889	0.31231746031746	0.147661290322581	0.354444444444444	0.33875	NO	MODERATE	NO	NO	NO	C	B	0.771004553935195	-1.27670611400408	-1.13405908973266	-0.574561023480561	1.41463726059973	-0.501135134662029	-0.855799313376298	-0.343196273908928	2.04771066793927	-0.559498066252099
AL1G20180	AT1G57720	OG0001725	.	protein_coding	Translation elongation factor EF1B%2C gamma chain	.	Translation elongation factor EF1B%2C gamma chain%3B FUNCTIONS IN: copper ion binding%2C translation elongation factor activity%3B INVOLVED IN: response to cadmium ion%2C response to zinc ion%3B LOCATED IN: cell wall%2C plasma membrane%2C vacuole%2C membrane%3B EXPRESSED IN: 6 plant structures%3B EXPRESSED DURING: seedling growth%2C seed development stages%3B CONTAINS InterPro DOMAIN/s: Thioredox…	.	Translation elongation factor EF1B%2C gamma chain%3B FUNCTIONS IN: copper ion binding%2C translation elongation factor activity%3B INVOLVED IN: response to cadmium ion%2C response to zinc ion%3B LOCATED IN: cell wall%2C plasma membrane%2C vacuole%2C membrane%3B EXPRESSED IN: 6 plant structures%3B EXPRESSED DURING: seedling growth%2C seed development stages%3B CONTAINS InterPro DOMAIN/s: Thioredox…	scaffold_1	3671165	3673749	2585	+	scaffold_1	3673112	3673677	566	*	0.186008702437181	0.00736125519658623	250.390741919097	0.377152777777778	2.56903636152644	8.96767265329E-4	8.1939	0.0156944444444444	0.315138888888889	0.31231746031746	0.147661290322581	0.354444444444444	0.33875	NO	NO	NO	NO	NO	C	B	0.771004553935195	-1.27670611400408	-1.13405908973266	-0.574561023480561	1.41463726059973	-0.501135134662029	-0.855799313376298	-0.343196273908928	2.04771066793927	-0.559498066252099
AL1G20180	AT1G57720	OG0001725	.	protein_coding	Translation elongation factor EF1B%2C gamma chain	.	Translation elongation factor EF1B%2C gamma chain%3B FUNCTIONS IN: copper ion binding%2C translation elongation factor activity%3B INVOLVED IN: response to cadmium ion%2C response to zinc ion%3B LOCATED IN: cell wall%2C plasma membrane%2C vacuole%2C membrane%3B EXPRESSED IN: 6 plant structures%3B EXPRESSED DURING: seedling growth%2C seed development stages%3B CONTAINS InterPro DOMAIN/s: Thioredox…	.	Translation elongation factor EF1B%2C gamma chain%3B FUNCTIONS IN: copper ion binding%2C translation elongation factor activity%3B INVOLVED IN: response to cadmium ion%2C response to zinc ion%3B LOCATED IN: cell wall%2C plasma membrane%2C vacuole%2C membrane%3B EXPRESSED IN: 6 plant structures%3B EXPRESSED DURING: seedling growth%2C seed development stages%3B CONTAINS InterPro DOMAIN/s: Thioredox…	scaffold_1	3671165	3673749	2585	+	scaffold_1	3673112	3673677	566	*	0.186008702437181	0.00736125519658623	250.390741919097	0.377152777777778	2.56903636152644	8.96767265329E-4	8.1939	0.0156944444444444	0.315138888888889	0.31231746031746	0.147661290322581	0.354444444444444	0.33875	NO	MODERATE	NO	NO	NO	C	B	0.771004553935195	-1.27670611400408	-1.13405908973266	-0.574561023480561	1.41463726059973	-0.501135134662029	-0.855799313376298	-0.343196273908928	2.04771066793927	-0.559498066252099
AL1G20190	AT1G09645	OG0019087	.	protein_coding	transmembrane protein	.	unknown protein%3B BEST Arabidopsis thaliana protein match is: unknown protein (TAIR:AT1G57765.1)%3B Has 35333 Blast hits to 34131 proteins in 2444 species: Archae - 798%3B Bacteria - 22429%3B Metazoa - 974%3B Fungi - 991%3B Plants - 531%3B Viruses - 0%3B Other Eukaryotes - 9610 (source: NCBI BLink).	.	unknown protein%3B BEST Arabidopsis thaliana protein match is: unknown protein (TAIR:AT1G57765.1)%3B Has 35333 Blast hits to 34131 proteins in 2444 species: Archae - 798%3B Bacteria - 22429%3B Metazoa - 974%3B Fungi - 991%3B Plants - 531%3B Viruses - 0%3B Other Eukaryotes - 9610 (source: NCBI BLink).	scaffold_1	3674185	3675659	1475	+	scaffold_1	3673112	3673677	566	*	0.186008702437181	0.00736125519658623	250.390741919097	0.377152777777778	2.56903636152644	8.96767265329E-4	8.1939	0.0156944444444444	0.315138888888889	0.31231746031746	0.147661290322581	0.354444444444444	0.33875	NO	NO	NO	NO	NO	C	B	0.771004553935195	-1.27670611400408	-1.13405908973266	-0.574561023480561	1.41463726059973	-0.501135134662029	-0.855799313376298	-0.343196273908928	2.04771066793927	-0.559498066252099
AL1G21190	AT1G10417	OG0006844	.	protein_coding	RUN/FYVE domain protein	.	unknown protein%3B Has 26006 Blast hits to 16906 proteins in 1326 species: Archae - 433%3B Bacteria - 3134%3B Metazoa - 12646%3B Fungi - 2033%3B Plants - 1219%3B Viruses - 58%3B Other Eukaryotes - 6483 (source: NCBI BLink).	Encodes protein with unknown function whose expression is repressed by inoculation with Agrobacterium tumerifaciens.	unknown protein%3B Has 26006 Blast hits to 16906 proteins in 1326 species: Archae - 433%3B Bacteria - 3134%3B Metazoa - 12646%3B Fungi - 2033%3B Plants - 1219%3B Viruses - 58%3B Other Eukaryotes - 6483 (source: NCBI BLink).	scaffold_1	4046403	4050233	3831	-	scaffold_1	4047436	4047658	223	*	0.163454847774048	-0.0970971212358889	238.072547202259	0.368888888888889	3.22111951456587	0.0134814066274	6.4202	-0.170694444444444	0.267916666666667	0.173396825396825	0.392983870967742	0.145555555555556	0.31625	NO	NO	NO	0.0555555555555556	0	C	B	-1.79382587189852	1.02293334029163	-0.0134739693829605	0.300082673582539	-1.15019316523399	1.79850431963368	0.264785806973401	0.531447423154172	-2.81675921219015	-0.3135566429655
AL1G26170	AT1G14290	OG0009637	SBH2	protein_coding	sphingoid base hydroxylase 2	sphingoid base hydroxylase 2	sphingoid base hydroxylase 2 (SBH2)%3B CONTAINS InterPro DOMAIN/s: Fatty acid hydroxylase (InterPro:IPR006694)%3B BEST Arabidopsis thaliana protein match is: sphingoid base hydroxylase 1 (TAIR:AT1G69640.1)%3B Has 2314 Blast hits to 2272 proteins in 379 species: Archae - 0%3B Bacteria - 367%3B Metazoa - 413%3B Fungi - 680%3B Plants - 393%3B Viruses - 3%3B Other Eukaryotes - 458 (source: NCBI BLink…	Encodes one of the two redundant sphingoid base hydroxylases (SBH). Involved in sphingolipid trihydroxy long-chain base (4-hydroxysphinganine) biosynthesis. Double mutants of SBHs were dwarfed and not able to progress from vegetative to reproductive growth.	sphingoid base hydroxylase 2 (SBH2)%3B CONTAINS InterPro DOMAIN/s: Fatty acid hydroxylase (InterPro:IPR006694)%3B BEST Arabidopsis thaliana protein match is: sphingoid base hydroxylase 1 (TAIR:AT1G69640.1)%3B Has 2314 Blast hits to 2272 proteins in 379 species: Archae - 0%3B Bacteria - 367%3B Metazoa - 413%3B Fungi - 680%3B Plants - 393%3B Viruses - 3%3B Other Eukaryotes - 458 (source: NCBI BLink…	scaffold_1	6004645	6007642	2998	-	scaffold_1	6005542	6005753	212	*	0.145938132557748	-0.150307392802983	211.754419408859	0.290555555555556	3.1337565980366	0.0129964628397	9.3449	-0.0327777777777778	0.24	0.100761904761905	0.334677419354839	0.252222222222222	0.285	NO	NO	NO	NO	NO	C	B	-2.08937586798798	1.08158369410819	-0.761279270137369	0.721017754955997	-1.44574316132345	1.85715467345024	-0.483019493781007	0.95238250452763	-3.17095956209617	-1.48229702509337
AL1G26370	AT1G14470	OG0009622	.	protein_coding	Pentatricopeptide repeat (PPR) superfamily protein	.	Pentatricopeptide repeat (PPR) superfamily protein%3B CONTAINS InterPro DOMAIN/s: Pentatricopeptide repeat (InterPro:IPR002885)%3B BEST Arabidopsis thaliana protein match is: Tetratricopeptide repeat (TPR)-like superfamily protein (TAIR:AT1G08070.1)%3B Has 45588 Blast hits to 14013 proteins in 255 species: Archae - 1%3B Bacteria - 22%3B Metazoa - 282%3B Fungi - 244%3B Plants - 44188%3B Viruses - …	.	Pentatricopeptide repeat (PPR) superfamily protein%3B CONTAINS InterPro DOMAIN/s: Pentatricopeptide repeat (InterPro:IPR002885)%3B BEST Arabidopsis thaliana protein match is: Tetratricopeptide repeat (TPR)-like superfamily protein (TAIR:AT1G08070.1)%3B Has 45588 Blast hits to 14013 proteins in 255 species: Archae - 1%3B Bacteria - 22%3B Metazoa - 282%3B Fungi - 244%3B Plants - 44188%3B Viruses - …	scaffold_1	6090987	6093298	2312	+	scaffold_1	6093014	6093676	663	*	0.183684371221666	-0.129322598810999	239.194129558613	0.328541666666667	4.14187832162964	5.74544901586E-4	4.4652	-0.0868055555555556	0.281805555555556	0.14431746031746	0.283467741935484	0.294444444444444	0.38125	NO	NO	NO	0.305555555555556	0.625	C	B	-1.77457548901147	-1.23851518593749	-1.17298389017233	-1.03748719569663	-1.13094278234694	-0.462944206595439	-0.894724113815968	-0.806122446124997	-0.53606030307398	-0.1354966944757
AL1G26370	AT1G14470	OG0009622	.	protein_coding	Pentatricopeptide repeat (PPR) superfamily protein	.	Pentatricopeptide repeat (PPR) superfamily protein%3B CONTAINS InterPro DOMAIN/s: Pentatricopeptide repeat (InterPro:IPR002885)%3B BEST Arabidopsis thaliana protein match is: Tetratricopeptide repeat (TPR)-like superfamily protein (TAIR:AT1G08070.1)%3B Has 45588 Blast hits to 14013 proteins in 255 species: Archae - 1%3B Bacteria - 22%3B Metazoa - 282%3B Fungi - 244%3B Plants - 44188%3B Viruses - …	.	Pentatricopeptide repeat (PPR) superfamily protein%3B CONTAINS InterPro DOMAIN/s: Pentatricopeptide repeat (InterPro:IPR002885)%3B BEST Arabidopsis thaliana protein match is: Tetratricopeptide repeat (TPR)-like superfamily protein (TAIR:AT1G08070.1)%3B Has 45588 Blast hits to 14013 proteins in 255 species: Archae - 1%3B Bacteria - 22%3B Metazoa - 282%3B Fungi - 244%3B Plants - 44188%3B Viruses - …	scaffold_1	6090987	6093298	2312	+	scaffold_1	6093014	6093676	663	*	0.183684371221666	-0.129322598810999	239.194129558613	0.328541666666667	4.14187832162964	5.74544901586E-4	4.4652	-0.0868055555555556	0.281805555555556	0.14431746031746	0.283467741935484	0.294444444444444	0.38125	NO	NO	NO	0.305555555555556	0.625	C	B	-1.77457548901147	-1.23851518593749	-1.17298389017233	-1.03748719569663	-1.13094278234694	-0.462944206595439	-0.894724113815968	-0.806122446124997	-0.53606030307398	-0.1354966944757
AL1G26540	AT1G14570	OG0009617	.	protein_coding	UBX domain-containing protein	.	UBX domain-containing protein%3B CONTAINS InterPro DOMAIN/s: UAS (InterPro:IPR006577)%2C Uncharacterised conserved protein UCP037991%2C UAS%2C UBX (InterPro:IPR017346)%2C UBX (InterPro:IPR001012)%2C Ubiquitin interacting motif (InterPro:IPR003903)%2C UBA-like (InterPro:IPR009060)%2C Thioredoxin-like fold (InterPro:IPR012336)%3B BEST Arabidopsis thaliana protein match is: structural constituent of…	Encodes a nuclear UBX-containing protein that can bridge ubiquitin to AtCDC48A.	UBX domain-containing protein%3B CONTAINS InterPro DOMAIN/s: UAS (InterPro:IPR006577)%2C Uncharacterised conserved protein UCP037991%2C UAS%2C UBX (InterPro:IPR017346)%2C UBX (InterPro:IPR001012)%2C Ubiquitin interacting motif (InterPro:IPR003903)%2C UBA-like (InterPro:IPR009060)%2C Thioredoxin-like fold (InterPro:IPR012336)%3B BEST Arabidopsis thaliana protein match is: structural constituent of…	scaffold_1	6148929	6153044	4116	+	scaffold_1	6151256	6151958	703	*	0.142593421806124	-0.0391611178794985	230.128023934518	0.404513888888889	2.082454832051	0.0276198454095	10.777	-0.169305555555556	0.30125	0.253904761904762	0.3325	0.194444444444444	0.36375	NO	NO	NO	0	0.09375	C	B	-0.318340642379175	1.3434643437077	0.436406897237057	-0.524376549058906	0.325292064285357	2.11903532304975	0.714666673593419	-0.293011799487273	-1.66180498608688	0.960783446295963
AL1G41430	AT1G27940	OG0001456	ABCB13	protein_coding	P-glycoprotein 13	ATP-binding cassette B13	P-glycoprotein 13 (PGP13)%3B FUNCTIONS IN: ATPase activity%2C coupled to transmembrane movement of substances%3B INVOLVED IN: transport%2C transmembrane transport%3B LOCATED IN: integral to membrane%3B EXPRESSED IN: 9 plant structures%3B EXPRESSED DURING: 4 anthesis%2C petal differentiation and expansion stage%3B CONTAINS InterPro DOMAIN/s: ATPase%2C AAA+ type%2C core (InterPro:IPR003593)%2C ABC …	.	P-glycoprotein 13 (PGP13)%3B FUNCTIONS IN: ATPase activity%2C coupled to transmembrane movement of substances%3B INVOLVED IN: transport%2C transmembrane transport%3B LOCATED IN: integral to membrane%3B EXPRESSED IN: 9 plant structures%3B EXPRESSED DURING: 4 anthesis%2C petal differentiation and expansion stage%3B CONTAINS InterPro DOMAIN/s: ATPase%2C AAA+ type%2C core (InterPro:IPR003593)%2C ABC …	scaffold_1	12260078	12264826	4749	-	scaffold_1	12265661	12266165	505	*	0.164543124161819	-0.186443694131735	203.271686742855	0.249375	3.63977757023372	0.00330949301573	0.33	0.0733333333333333	0.236111111111111	0.0587301587301587	0.29741935483871	0.503333333333333	0.43	NO	NO	NO	NO	NO	C	B	-3.16060305687925	1.0774918089582	-2.52038082846856	-1.49426833022841	-2.51697035021472	1.85306278830025	-2.2421210521122	-1.26290358065678	-4.23809486583745	-1.02611249824015
AL1G41430	AT1G27940	OG0001456	ABCB13	protein_coding	P-glycoprotein 13	ATP-binding cassette B13	P-glycoprotein 13 (PGP13)%3B FUNCTIONS IN: ATPase activity%2C coupled to transmembrane movement of substances%3B INVOLVED IN: transport%2C transmembrane transport%3B LOCATED IN: integral to membrane%3B EXPRESSED IN: 9 plant structures%3B EXPRESSED DURING: 4 anthesis%2C petal differentiation and expansion stage%3B CONTAINS InterPro DOMAIN/s: ATPase%2C AAA+ type%2C core (InterPro:IPR003593)%2C ABC …	.	P-glycoprotein 13 (PGP13)%3B FUNCTIONS IN: ATPase activity%2C coupled to transmembrane movement of substances%3B INVOLVED IN: transport%2C transmembrane transport%3B LOCATED IN: integral to membrane%3B EXPRESSED IN: 9 plant structures%3B EXPRESSED DURING: 4 anthesis%2C petal differentiation and expansion stage%3B CONTAINS InterPro DOMAIN/s: ATPase%2C AAA+ type%2C core (InterPro:IPR003593)%2C ABC …	scaffold_1	12260078	12264826	4749	-	scaffold_1	12265661	12266165	505	*	0.164543124161819	-0.186443694131735	203.271686742855	0.249375	3.63977757023372	0.00330949301573	0.33	0.0733333333333333	0.236111111111111	0.0587301587301587	0.29741935483871	0.503333333333333	0.43	NO	NO	NO	NO	NO	C	B	-3.16060305687925	1.0774918089582	-2.52038082846856	-1.49426833022841	-2.51697035021472	1.85306278830025	-2.2421210521122	-1.26290358065678	-4.23809486583745	-1.02611249824015
AL1G41430	AT1G27940	OG0001456	ABCB13	protein_coding	P-glycoprotein 13	ATP-binding cassette B13	P-glycoprotein 13 (PGP13)%3B FUNCTIONS IN: ATPase activity%2C coupled to transmembrane movement of substances%3B INVOLVED IN: transport%2C transmembrane transport%3B LOCATED IN: integral to membrane%3B EXPRESSED IN: 9 plant structures%3B EXPRESSED DURING: 4 anthesis%2C petal differentiation and expansion stage%3B CONTAINS InterPro DOMAIN/s: ATPase%2C AAA+ type%2C core (InterPro:IPR003593)%2C ABC …	.	P-glycoprotein 13 (PGP13)%3B FUNCTIONS IN: ATPase activity%2C coupled to transmembrane movement of substances%3B INVOLVED IN: transport%2C transmembrane transport%3B LOCATED IN: integral to membrane%3B EXPRESSED IN: 9 plant structures%3B EXPRESSED DURING: 4 anthesis%2C petal differentiation and expansion stage%3B CONTAINS InterPro DOMAIN/s: ATPase%2C AAA+ type%2C core (InterPro:IPR003593)%2C ABC …	scaffold_1	12260078	12264826	4749	-	scaffold_1	12266198	12266533	336	*	0.109387910722334	-0.153495862867671	163.190974925993	0.206180555555556	2.38869765436376	0.0138753078716	4.825	0.0361111111111111	0.166666666666667	0.0617142857142857	0.276290322580645	0.351111111111111	0.315	NO	NO	NO	NO	NO	C	B	-2.55931168552485	0.315037209342959	0.423681481708704	-0.608358730744122	-1.91567897886032	1.09060818868501	0.701941258065066	-0.376993981172489	-2.87434889486781	1.03204021245283
AL1G41430	AT1G27940	OG0001456	ABCB13	protein_coding	P-glycoprotein 13	ATP-binding cassette B13	P-glycoprotein 13 (PGP13)%3B FUNCTIONS IN: ATPase activity%2C coupled to transmembrane movement of substances%3B INVOLVED IN: transport%2C transmembrane transport%3B LOCATED IN: integral to membrane%3B EXPRESSED IN: 9 plant structures%3B EXPRESSED DURING: 4 anthesis%2C petal differentiation and expansion stage%3B CONTAINS InterPro DOMAIN/s: ATPase%2C AAA+ type%2C core (InterPro:IPR003593)%2C ABC …	.	P-glycoprotein 13 (PGP13)%3B FUNCTIONS IN: ATPase activity%2C coupled to transmembrane movement of substances%3B INVOLVED IN: transport%2C transmembrane transport%3B LOCATED IN: integral to membrane%3B EXPRESSED IN: 9 plant structures%3B EXPRESSED DURING: 4 anthesis%2C petal differentiation and expansion stage%3B CONTAINS InterPro DOMAIN/s: ATPase%2C AAA+ type%2C core (InterPro:IPR003593)%2C ABC …	scaffold_1	12260078	12264826	4749	-	scaffold_1	12265661	12266165	505	*	0.164543124161819	-0.186443694131735	203.271686742855	0.249375	3.63977757023372	0.00330949301573	0.33	0.0733333333333333	0.236111111111111	0.0587301587301587	0.29741935483871	0.503333333333333	0.43	NO	NO	NO	NO	NO	C	B	-3.16060305687925	1.0774918089582	-2.52038082846856	-1.49426833022841	-2.51697035021472	1.85306278830025	-2.2421210521122	-1.26290358065678	-4.23809486583745	-1.02611249824015
AL1G41430	AT1G27940	OG0001456	ABCB13	protein_coding	P-glycoprotein 13	ATP-binding cassette B13	P-glycoprotein 13 (PGP13)%3B FUNCTIONS IN: ATPase activity%2C coupled to transmembrane movement of substances%3B INVOLVED IN: transport%2C transmembrane transport%3B LOCATED IN: integral to membrane%3B EXPRESSED IN: 9 plant structures%3B EXPRESSED DURING: 4 anthesis%2C petal differentiation and expansion stage%3B CONTAINS InterPro DOMAIN/s: ATPase%2C AAA+ type%2C core (InterPro:IPR003593)%2C ABC …	.	P-glycoprotein 13 (PGP13)%3B FUNCTIONS IN: ATPase activity%2C coupled to transmembrane movement of substances%3B INVOLVED IN: transport%2C transmembrane transport%3B LOCATED IN: integral to membrane%3B EXPRESSED IN: 9 plant structures%3B EXPRESSED DURING: 4 anthesis%2C petal differentiation and expansion stage%3B CONTAINS InterPro DOMAIN/s: ATPase%2C AAA+ type%2C core (InterPro:IPR003593)%2C ABC …	scaffold_1	12260078	12264826	4749	-	scaffold_1	12265661	12266165	505	*	0.164543124161819	-0.186443694131735	203.271686742855	0.249375	3.63977757023372	0.00330949301573	0.33	0.0733333333333333	0.236111111111111	0.0587301587301587	0.29741935483871	0.503333333333333	0.43	NO	NO	NO	NO	NO	C	B	-3.16060305687925	1.0774918089582	-2.52038082846856	-1.49426833022841	-2.51697035021472	1.85306278830025	-2.2421210521122	-1.26290358065678	-4.23809486583745	-1.02611249824015
AL1G41430	AT1G27940	OG0001456	ABCB13	protein_coding	P-glycoprotein 13	ATP-binding cassette B13	P-glycoprotein 13 (PGP13)%3B FUNCTIONS IN: ATPase activity%2C coupled to transmembrane movement of substances%3B INVOLVED IN: transport%2C transmembrane transport%3B LOCATED IN: integral to membrane%3B EXPRESSED IN: 9 plant structures%3B EXPRESSED DURING: 4 anthesis%2C petal differentiation and expansion stage%3B CONTAINS InterPro DOMAIN/s: ATPase%2C AAA+ type%2C core (InterPro:IPR003593)%2C ABC …	.	P-glycoprotein 13 (PGP13)%3B FUNCTIONS IN: ATPase activity%2C coupled to transmembrane movement of substances%3B INVOLVED IN: transport%2C transmembrane transport%3B LOCATED IN: integral to membrane%3B EXPRESSED IN: 9 plant structures%3B EXPRESSED DURING: 4 anthesis%2C petal differentiation and expansion stage%3B CONTAINS InterPro DOMAIN/s: ATPase%2C AAA+ type%2C core (InterPro:IPR003593)%2C ABC …	scaffold_1	12260078	12264826	4749	-	scaffold_1	12266198	12266533	336	*	0.109387910722334	-0.153495862867671	163.190974925993	0.206180555555556	2.38869765436376	0.0138753078716	4.825	0.0361111111111111	0.166666666666667	0.0617142857142857	0.276290322580645	0.351111111111111	0.315	NO	NO	NO	NO	NO	C	B	-2.55931168552485	0.315037209342959	0.423681481708704	-0.608358730744122	-1.91567897886032	1.09060818868501	0.701941258065066	-0.376993981172489	-2.87434889486781	1.03204021245283
AL1G41430	AT1G27940	OG0001456	ABCB13	protein_coding	P-glycoprotein 13	ATP-binding cassette B13	P-glycoprotein 13 (PGP13)%3B FUNCTIONS IN: ATPase activity%2C coupled to transmembrane movement of substances%3B INVOLVED IN: transport%2C transmembrane transport%3B LOCATED IN: integral to membrane%3B EXPRESSED IN: 9 plant structures%3B EXPRESSED DURING: 4 anthesis%2C petal differentiation and expansion stage%3B CONTAINS InterPro DOMAIN/s: ATPase%2C AAA+ type%2C core (InterPro:IPR003593)%2C ABC …	.	P-glycoprotein 13 (PGP13)%3B FUNCTIONS IN: ATPase activity%2C coupled to transmembrane movement of substances%3B INVOLVED IN: transport%2C transmembrane transport%3B LOCATED IN: integral to membrane%3B EXPRESSED IN: 9 plant structures%3B EXPRESSED DURING: 4 anthesis%2C petal differentiation and expansion stage%3B CONTAINS InterPro DOMAIN/s: ATPase%2C AAA+ type%2C core (InterPro:IPR003593)%2C ABC …	scaffold_1	12260078	12264826	4749	-	scaffold_1	12265661	12266165	505	*	0.164543124161819	-0.186443694131735	203.271686742855	0.249375	3.63977757023372	0.00330949301573	0.33	0.0733333333333333	0.236111111111111	0.0587301587301587	0.29741935483871	0.503333333333333	0.43	NO	NO	NO	NO	NO	C	B	-3.16060305687925	1.0774918089582	-2.52038082846856	-1.49426833022841	-2.51697035021472	1.85306278830025	-2.2421210521122	-1.26290358065678	-4.23809486583745	-1.02611249824015
AL1G41430	AT1G28010	OG0001456	ABCB14	protein_coding	P-glycoprotein 14	ATP-binding cassette B14	P-glycoprotein 14 (PGP14)%3B FUNCTIONS IN: ATPase activity%2C coupled to transmembrane movement of substances%3B INVOLVED IN: transport%2C transmembrane transport%3B LOCATED IN: integral to membrane%3B EXPRESSED IN: 9 plant structures%3B EXPRESSED DURING: LP.04 four leaves visible%2C LP.02 two leaves visible%2C LP.12 twelve leaves visible%3B CONTAINS InterPro DOMAIN/s: ATPase%2C AAA+ type%2C core…	Encodes an ATP-binding cassette (ABC) transporter. Expressed in the vascular tissue of primary stem.	P-glycoprotein 14 (PGP14)%3B FUNCTIONS IN: ATPase activity%2C coupled to transmembrane movement of substances%3B INVOLVED IN: transport%2C transmembrane transport%3B LOCATED IN: integral to membrane%3B EXPRESSED IN: 9 plant structures%3B EXPRESSED DURING: LP.04 four leaves visible%2C LP.02 two leaves visible%2C LP.12 twelve leaves visible%3B CONTAINS InterPro DOMAIN/s: ATPase%2C AAA+ type%2C core…	scaffold_1	12260078	12264826	4749	-	scaffold_1	12265661	12266165	505	*	0.164543124161819	-0.186443694131735	203.271686742855	0.249375	3.63977757023372	0.00330949301573	0.33	0.0733333333333333	0.236111111111111	0.0587301587301587	0.29741935483871	0.503333333333333	0.43	NO	NO	NO	NO	NO	C	B	-3.16060305687925	1.0774918089582	-2.52038082846856	-1.49426833022841	-2.51697035021472	1.85306278830025	-2.2421210521122	-1.26290358065678	-4.23809486583745	-1.02611249824015
AL1G41430	AT1G28010	OG0001456	ABCB14	protein_coding	P-glycoprotein 14	ATP-binding cassette B14	P-glycoprotein 14 (PGP14)%3B FUNCTIONS IN: ATPase activity%2C coupled to transmembrane movement of substances%3B INVOLVED IN: transport%2C transmembrane transport%3B LOCATED IN: integral to membrane%3B EXPRESSED IN: 9 plant structures%3B EXPRESSED DURING: LP.04 four leaves visible%2C LP.02 two leaves visible%2C LP.12 twelve leaves visible%3B CONTAINS InterPro DOMAIN/s: ATPase%2C AAA+ type%2C core…	Encodes an ATP-binding cassette (ABC) transporter. Expressed in the vascular tissue of primary stem.	P-glycoprotein 14 (PGP14)%3B FUNCTIONS IN: ATPase activity%2C coupled to transmembrane movement of substances%3B INVOLVED IN: transport%2C transmembrane transport%3B LOCATED IN: integral to membrane%3B EXPRESSED IN: 9 plant structures%3B EXPRESSED DURING: LP.04 four leaves visible%2C LP.02 two leaves visible%2C LP.12 twelve leaves visible%3B CONTAINS InterPro DOMAIN/s: ATPase%2C AAA+ type%2C core…	scaffold_1	12260078	12264826	4749	-	scaffold_1	12265661	12266165	505	*	0.164543124161819	-0.186443694131735	203.271686742855	0.249375	3.63977757023372	0.00330949301573	0.33	0.0733333333333333	0.236111111111111	0.0587301587301587	0.29741935483871	0.503333333333333	0.43	NO	NO	NO	NO	NO	C	B	-3.16060305687925	1.0774918089582	-2.52038082846856	-1.49426833022841	-2.51697035021472	1.85306278830025	-2.2421210521122	-1.26290358065678	-4.23809486583745	-1.02611249824015
AL1G41430	AT1G28010	OG0001456	ABCB14	protein_coding	P-glycoprotein 14	ATP-binding cassette B14	P-glycoprotein 14 (PGP14)%3B FUNCTIONS IN: ATPase activity%2C coupled to transmembrane movement of substances%3B INVOLVED IN: transport%2C transmembrane transport%3B LOCATED IN: integral to membrane%3B EXPRESSED IN: 9 plant structures%3B EXPRESSED DURING: LP.04 four leaves visible%2C LP.02 two leaves visible%2C LP.12 twelve leaves visible%3B CONTAINS InterPro DOMAIN/s: ATPase%2C AAA+ type%2C core…	Encodes an ATP-binding cassette (ABC) transporter. Expressed in the vascular tissue of primary stem.	P-glycoprotein 14 (PGP14)%3B FUNCTIONS IN: ATPase activity%2C coupled to transmembrane movement of substances%3B INVOLVED IN: transport%2C transmembrane transport%3B LOCATED IN: integral to membrane%3B EXPRESSED IN: 9 plant structures%3B EXPRESSED DURING: LP.04 four leaves visible%2C LP.02 two leaves visible%2C LP.12 twelve leaves visible%3B CONTAINS InterPro DOMAIN/s: ATPase%2C AAA+ type%2C core…	scaffold_1	12260078	12264826	4749	-	scaffold_1	12266198	12266533	336	*	0.109387910722334	-0.153495862867671	163.190974925993	0.206180555555556	2.38869765436376	0.0138753078716	4.825	0.0361111111111111	0.166666666666667	0.0617142857142857	0.276290322580645	0.351111111111111	0.315	NO	NO	NO	NO	NO	C	B	-2.55931168552485	0.315037209342959	0.423681481708704	-0.608358730744122	-1.91567897886032	1.09060818868501	0.701941258065066	-0.376993981172489	-2.87434889486781	1.03204021245283
AL1G41430	AT1G28010	OG0001456	ABCB14	protein_coding	P-glycoprotein 14	ATP-binding cassette B14	P-glycoprotein 14 (PGP14)%3B FUNCTIONS IN: ATPase activity%2C coupled to transmembrane movement of substances%3B INVOLVED IN: transport%2C transmembrane transport%3B LOCATED IN: integral to membrane%3B EXPRESSED IN: 9 plant structures%3B EXPRESSED DURING: LP.04 four leaves visible%2C LP.02 two leaves visible%2C LP.12 twelve leaves visible%3B CONTAINS InterPro DOMAIN/s: ATPase%2C AAA+ type%2C core…	Encodes an ATP-binding cassette (ABC) transporter. Expressed in the vascular tissue of primary stem.	P-glycoprotein 14 (PGP14)%3B FUNCTIONS IN: ATPase activity%2C coupled to transmembrane movement of substances%3B INVOLVED IN: transport%2C transmembrane transport%3B LOCATED IN: integral to membrane%3B EXPRESSED IN: 9 plant structures%3B EXPRESSED DURING: LP.04 four leaves visible%2C LP.02 two leaves visible%2C LP.12 twelve leaves visible%3B CONTAINS InterPro DOMAIN/s: ATPase%2C AAA+ type%2C core…	scaffold_1	12260078	12264826	4749	-	scaffold_1	12265661	12266165	505	*	0.164543124161819	-0.186443694131735	203.271686742855	0.249375	3.63977757023372	0.00330949301573	0.33	0.0733333333333333	0.236111111111111	0.0587301587301587	0.29741935483871	0.503333333333333	0.43	NO	NO	NO	NO	NO	C	B	-3.16060305687925	1.0774918089582	-2.52038082846856	-1.49426833022841	-2.51697035021472	1.85306278830025	-2.2421210521122	-1.26290358065678	-4.23809486583745	-1.02611249824015
AL1G41430	AT1G28010	OG0001456	ABCB14	protein_coding	P-glycoprotein 14	ATP-binding cassette B14	P-glycoprotein 14 (PGP14)%3B FUNCTIONS IN: ATPase activity%2C coupled to transmembrane movement of substances%3B INVOLVED IN: transport%2C transmembrane transport%3B LOCATED IN: integral to membrane%3B EXPRESSED IN: 9 plant structures%3B EXPRESSED DURING: LP.04 four leaves visible%2C LP.02 two leaves visible%2C LP.12 twelve leaves visible%3B CONTAINS InterPro DOMAIN/s: ATPase%2C AAA+ type%2C core…	Encodes an ATP-binding cassette (ABC) transporter. Expressed in the vascular tissue of primary stem.	P-glycoprotein 14 (PGP14)%3B FUNCTIONS IN: ATPase activity%2C coupled to transmembrane movement of substances%3B INVOLVED IN: transport%2C transmembrane transport%3B LOCATED IN: integral to membrane%3B EXPRESSED IN: 9 plant structures%3B EXPRESSED DURING: LP.04 four leaves visible%2C LP.02 two leaves visible%2C LP.12 twelve leaves visible%3B CONTAINS InterPro DOMAIN/s: ATPase%2C AAA+ type%2C core…	scaffold_1	12260078	12264826	4749	-	scaffold_1	12265661	12266165	505	*	0.164543124161819	-0.186443694131735	203.271686742855	0.249375	3.63977757023372	0.00330949301573	0.33	0.0733333333333333	0.236111111111111	0.0587301587301587	0.29741935483871	0.503333333333333	0.43	NO	NO	NO	NO	NO	C	B	-3.16060305687925	1.0774918089582	-2.52038082846856	-1.49426833022841	-2.51697035021472	1.85306278830025	-2.2421210521122	-1.26290358065678	-4.23809486583745	-1.02611249824015
AL1G41430	AT1G28010	OG0001456	ABCB14	protein_coding	P-glycoprotein 14	ATP-binding cassette B14	P-glycoprotein 14 (PGP14)%3B FUNCTIONS IN: ATPase activity%2C coupled to transmembrane movement of substances%3B INVOLVED IN: transport%2C transmembrane transport%3B LOCATED IN: integral to membrane%3B EXPRESSED IN: 9 plant structures%3B EXPRESSED DURING: LP.04 four leaves visible%2C LP.02 two leaves visible%2C LP.12 twelve leaves visible%3B CONTAINS InterPro DOMAIN/s: ATPase%2C AAA+ type%2C core…	Encodes an ATP-binding cassette (ABC) transporter. Expressed in the vascular tissue of primary stem.	P-glycoprotein 14 (PGP14)%3B FUNCTIONS IN: ATPase activity%2C coupled to transmembrane movement of substances%3B INVOLVED IN: transport%2C transmembrane transport%3B LOCATED IN: integral to membrane%3B EXPRESSED IN: 9 plant structures%3B EXPRESSED DURING: LP.04 four leaves visible%2C LP.02 two leaves visible%2C LP.12 twelve leaves visible%3B CONTAINS InterPro DOMAIN/s: ATPase%2C AAA+ type%2C core…	scaffold_1	12260078	12264826	4749	-	scaffold_1	12266198	12266533	336	*	0.109387910722334	-0.153495862867671	163.190974925993	0.206180555555556	2.38869765436376	0.0138753078716	4.825	0.0361111111111111	0.166666666666667	0.0617142857142857	0.276290322580645	0.351111111111111	0.315	NO	NO	NO	NO	NO	C	B	-2.55931168552485	0.315037209342959	0.423681481708704	-0.608358730744122	-1.91567897886032	1.09060818868501	0.701941258065066	-0.376993981172489	-2.87434889486781	1.03204021245283
AL1G41430	AT1G28010	OG0001456	ABCB14	protein_coding	P-glycoprotein 14	ATP-binding cassette B14	P-glycoprotein 14 (PGP14)%3B FUNCTIONS IN: ATPase activity%2C coupled to transmembrane movement of substances%3B INVOLVED IN: transport%2C transmembrane transport%3B LOCATED IN: integral to membrane%3B EXPRESSED IN: 9 plant structures%3B EXPRESSED DURING: LP.04 four leaves visible%2C LP.02 two leaves visible%2C LP.12 twelve leaves visible%3B CONTAINS InterPro DOMAIN/s: ATPase%2C AAA+ type%2C core…	Encodes an ATP-binding cassette (ABC) transporter. Expressed in the vascular tissue of primary stem.	P-glycoprotein 14 (PGP14)%3B FUNCTIONS IN: ATPase activity%2C coupled to transmembrane movement of substances%3B INVOLVED IN: transport%2C transmembrane transport%3B LOCATED IN: integral to membrane%3B EXPRESSED IN: 9 plant structures%3B EXPRESSED DURING: LP.04 four leaves visible%2C LP.02 two leaves visible%2C LP.12 twelve leaves visible%3B CONTAINS InterPro DOMAIN/s: ATPase%2C AAA+ type%2C core…	scaffold_1	12260078	12264826	4749	-	scaffold_1	12265661	12266165	505	*	0.164543124161819	-0.186443694131735	203.271686742855	0.249375	3.63977757023372	0.00330949301573	0.33	0.0733333333333333	0.236111111111111	0.0587301587301587	0.29741935483871	0.503333333333333	0.43	NO	NO	NO	NO	NO	C	B	-3.16060305687925	1.0774918089582	-2.52038082846856	-1.49426833022841	-2.51697035021472	1.85306278830025	-2.2421210521122	-1.26290358065678	-4.23809486583745	-1.02611249824015
AL1G46180	AT1G32120	OG0022493	.	protein_coding	serine/threonine-protein phosphatase 7 long form-like protein	.	FUNCTIONS IN: molecular_function unknown%3B INVOLVED IN: biological_process unknown%3B LOCATED IN: membrane%3B EXPRESSED IN: 14 plant structures%3B EXPRESSED DURING: 4 anthesis%2C C globular stage%2C F mature embryo stage%2C petal differentiation and expansion stage%2C E expanded cotyledon stage%3B CONTAINS InterPro DOMAIN/s: Aminotransferase-like%2C plant mobile domain (InterPro:IPR019557)%2C Pr…	.	FUNCTIONS IN: molecular_function unknown%3B INVOLVED IN: biological_process unknown%3B LOCATED IN: membrane%3B EXPRESSED IN: 14 plant structures%3B EXPRESSED DURING: 4 anthesis%2C C globular stage%2C F mature embryo stage%2C petal differentiation and expansion stage%2C E expanded cotyledon stage%3B CONTAINS InterPro DOMAIN/s: Aminotransferase-like%2C plant mobile domain (InterPro:IPR019557)%2C Pr…	scaffold_1	14586049	14589214	3166	+	scaffold_1	14587771	14588307	537	*	0.136672803254599	0.0422946420758593	259.735501231033	0.432847222222222	2.20791286489288	0.0259888292128	8.0249	0.177777777777778	0.314444444444444	0.350793650793651	0.267903225806452	0.387777777777778	0.21	NO	NO	NO	NO	NO	C	B	1.83090798818703	-0.34648422323915	-0.54120443688232	0.779395612956697	2.47454069485156	0.429086756102901	-0.262944660525958	1.01076036252833	2.17739221142618	-1.32060004983902
AL1G46180	AT1G32120	OG0022493	.	protein_coding	serine/threonine-protein phosphatase 7 long form-like protein	.	FUNCTIONS IN: molecular_function unknown%3B INVOLVED IN: biological_process unknown%3B LOCATED IN: membrane%3B EXPRESSED IN: 14 plant structures%3B EXPRESSED DURING: 4 anthesis%2C C globular stage%2C F mature embryo stage%2C petal differentiation and expansion stage%2C E expanded cotyledon stage%3B CONTAINS InterPro DOMAIN/s: Aminotransferase-like%2C plant mobile domain (InterPro:IPR019557)%2C Pr…	.	FUNCTIONS IN: molecular_function unknown%3B INVOLVED IN: biological_process unknown%3B LOCATED IN: membrane%3B EXPRESSED IN: 14 plant structures%3B EXPRESSED DURING: 4 anthesis%2C C globular stage%2C F mature embryo stage%2C petal differentiation and expansion stage%2C E expanded cotyledon stage%3B CONTAINS InterPro DOMAIN/s: Aminotransferase-like%2C plant mobile domain (InterPro:IPR019557)%2C Pr…	scaffold_1	14586049	14589214	3166	+	scaffold_1	14587771	14588307	537	*	0.136672803254599	0.0422946420758593	259.735501231033	0.432847222222222	2.20791286489288	0.0259888292128	8.0249	0.177777777777778	0.314444444444444	0.350793650793651	0.267903225806452	0.387777777777778	0.21	NO	NO	NO	NO	NO	C	B	1.83090798818703	-0.34648422323915	-0.54120443688232	0.779395612956697	2.47454069485156	0.429086756102901	-0.262944660525958	1.01076036252833	2.17739221142618	-1.32060004983902
AL1G56300	AT1G49340	OG0012588	ATPI4K ALPHA	protein_coding	Phosphatidylinositol 3- and 4-kinase family protein	.	ATPI4K ALPHA%3B FUNCTIONS IN: 1-phosphatidylinositol 4-kinase activity%2C inositol or phosphatidylinositol kinase activity%3B INVOLVED IN: protein amino acid phosphorylation%3B LOCATED IN: plasma membrane%3B EXPRESSED IN: shoot%2C male gametophyte%2C flower%2C pollen tube%3B EXPRESSED DURING: L mature pollen stage%2C M germinated pollen stage%3B CONTAINS InterPro DOMAIN/s: Phosphoinositide 3-kina…	Encodes a phosphatidylinositol 4-kinase that is expressed in inflorescences and shoots.	ATPI4K ALPHA%3B FUNCTIONS IN: 1-phosphatidylinositol 4-kinase activity%2C inositol or phosphatidylinositol kinase activity%3B INVOLVED IN: protein amino acid phosphorylation%3B LOCATED IN: plasma membrane%3B EXPRESSED IN: shoot%2C male gametophyte%2C flower%2C pollen tube%3B EXPRESSED DURING: L mature pollen stage%2C M germinated pollen stage%3B CONTAINS InterPro DOMAIN/s: Phosphoinositide 3-kina…	scaffold_1	25343713	25356896	13184	+	scaffold_1	25345201	25345623	423	*	0.171944815249694	0.103325719443936	282.126113242749	0.293819444444444	3.95315417847436	0.0204574931047	5.8895	-0.234166666666667	0.2675	0.395873015873016	0.0417741935483871	0.563333333333333	0.7975	NO	NO	NO	0.694444444444444	1	B	B	3.76047577874803	-2.11281464631918	-1.87961872892324	-0.956577532853551	4.40410848541256	-1.33724366697713	-1.60135895256688	-0.725212783281918	5.87329042506721	-0.923041196069689
AL1G56300	AT1G49340	OG0012588	ATPI4K ALPHA	protein_coding	Phosphatidylinositol 3- and 4-kinase family protein	.	ATPI4K ALPHA%3B FUNCTIONS IN: 1-phosphatidylinositol 4-kinase activity%2C inositol or phosphatidylinositol kinase activity%3B INVOLVED IN: protein amino acid phosphorylation%3B LOCATED IN: plasma membrane%3B EXPRESSED IN: shoot%2C male gametophyte%2C flower%2C pollen tube%3B EXPRESSED DURING: L mature pollen stage%2C M germinated pollen stage%3B CONTAINS InterPro DOMAIN/s: Phosphoinositide 3-kina…	Encodes a phosphatidylinositol 4-kinase that is expressed in inflorescences and shoots.	ATPI4K ALPHA%3B FUNCTIONS IN: 1-phosphatidylinositol 4-kinase activity%2C inositol or phosphatidylinositol kinase activity%3B INVOLVED IN: protein amino acid phosphorylation%3B LOCATED IN: plasma membrane%3B EXPRESSED IN: shoot%2C male gametophyte%2C flower%2C pollen tube%3B EXPRESSED DURING: L mature pollen stage%2C M germinated pollen stage%3B CONTAINS InterPro DOMAIN/s: Phosphoinositide 3-kina…	scaffold_1	25343713	25356896	13184	+	scaffold_1	25345631	25345960	330	*	0.210997829155028	0.0920678792678641	324.346110711556	0.343194444444444	4.39361147335232	0.011800727731	10.704	-0.317638888888889	0.32625	0.411809523809524	0.0483064516129032	0.511111111111111	0.82875	NO	MODERATE	NO	0.694444444444444	1	C	B	1.93848365726173	-2.11281464631918	-0.779993116502594	-0.956577532853551	2.58211636392626	-1.33724366697713	-0.501733340146232	-0.725212783281918	4.05129830358091	0.176584416350957
AL1G56300	AT1G49340	OG0012588	ATPI4K ALPHA	protein_coding	Phosphatidylinositol 3- and 4-kinase family protein	.	ATPI4K ALPHA%3B FUNCTIONS IN: 1-phosphatidylinositol 4-kinase activity%2C inositol or phosphatidylinositol kinase activity%3B INVOLVED IN: protein amino acid phosphorylation%3B LOCATED IN: plasma membrane%3B EXPRESSED IN: shoot%2C male gametophyte%2C flower%2C pollen tube%3B EXPRESSED DURING: L mature pollen stage%2C M germinated pollen stage%3B CONTAINS InterPro DOMAIN/s: Phosphoinositide 3-kina…	Encodes a phosphatidylinositol 4-kinase that is expressed in inflorescences and shoots.	ATPI4K ALPHA%3B FUNCTIONS IN: 1-phosphatidylinositol 4-kinase activity%2C inositol or phosphatidylinositol kinase activity%3B INVOLVED IN: protein amino acid phosphorylation%3B LOCATED IN: plasma membrane%3B EXPRESSED IN: shoot%2C male gametophyte%2C flower%2C pollen tube%3B EXPRESSED DURING: L mature pollen stage%2C M germinated pollen stage%3B CONTAINS InterPro DOMAIN/s: Phosphoinositide 3-kina…	scaffold_1	25343713	25356896	13184	+	scaffold_1	25345201	25345623	423	*	0.171944815249694	0.103325719443936	282.126113242749	0.293819444444444	3.95315417847436	0.0204574931047	5.8895	-0.234166666666667	0.2675	0.395873015873016	0.0417741935483871	0.563333333333333	0.7975	NO	MODERATE	NO	0.694444444444444	1	C	B	3.76047577874803	-2.11281464631918	-1.87961872892324	-0.956577532853551	4.40410848541256	-1.33724366697713	-1.60135895256688	-0.725212783281918	5.87329042506721	-0.923041196069689
AL1G56300	AT1G49340	OG0012588	ATPI4K ALPHA	protein_coding	Phosphatidylinositol 3- and 4-kinase family protein	.	ATPI4K ALPHA%3B FUNCTIONS IN: 1-phosphatidylinositol 4-kinase activity%2C inositol or phosphatidylinositol kinase activity%3B INVOLVED IN: protein amino acid phosphorylation%3B LOCATED IN: plasma membrane%3B EXPRESSED IN: shoot%2C male gametophyte%2C flower%2C pollen tube%3B EXPRESSED DURING: L mature pollen stage%2C M germinated pollen stage%3B CONTAINS InterPro DOMAIN/s: Phosphoinositide 3-kina…	Encodes a phosphatidylinositol 4-kinase that is expressed in inflorescences and shoots.	ATPI4K ALPHA%3B FUNCTIONS IN: 1-phosphatidylinositol 4-kinase activity%2C inositol or phosphatidylinositol kinase activity%3B INVOLVED IN: protein amino acid phosphorylation%3B LOCATED IN: plasma membrane%3B EXPRESSED IN: shoot%2C male gametophyte%2C flower%2C pollen tube%3B EXPRESSED DURING: L mature pollen stage%2C M germinated pollen stage%3B CONTAINS InterPro DOMAIN/s: Phosphoinositide 3-kina…	scaffold_1	25343713	25356896	13184	+	scaffold_1	25350773	25351347	575	*	0.141768074220237	0.0441873406994909	232.968988868547	0.276944444444444	3.30791577517795	0.00670700074643	3.6523	-0.218194444444444	0.224861111111111	0.309523809523809	0.110564516129032	0.405555555555556	0.62375	NO	NO	NO	0.694444444444444	1	B	B	1.14582083250074	-2.72386949538471	-1.65430401868593	-0.497748052427013	1.78945353916527	-1.94829851604266	-1.37604424232957	-0.26638330285538	3.86969032788545	-1.15655596625892
AL1G56300	AT1G49340	OG0012588	ATPI4K ALPHA	protein_coding	Phosphatidylinositol 3- and 4-kinase family protein	.	ATPI4K ALPHA%3B FUNCTIONS IN: 1-phosphatidylinositol 4-kinase activity%2C inositol or phosphatidylinositol kinase activity%3B INVOLVED IN: protein amino acid phosphorylation%3B LOCATED IN: plasma membrane%3B EXPRESSED IN: shoot%2C male gametophyte%2C flower%2C pollen tube%3B EXPRESSED DURING: L mature pollen stage%2C M germinated pollen stage%3B CONTAINS InterPro DOMAIN/s: Phosphoinositide 3-kina…	Encodes a phosphatidylinositol 4-kinase that is expressed in inflorescences and shoots.	ATPI4K ALPHA%3B FUNCTIONS IN: 1-phosphatidylinositol 4-kinase activity%2C inositol or phosphatidylinositol kinase activity%3B INVOLVED IN: protein amino acid phosphorylation%3B LOCATED IN: plasma membrane%3B EXPRESSED IN: shoot%2C male gametophyte%2C flower%2C pollen tube%3B EXPRESSED DURING: L mature pollen stage%2C M germinated pollen stage%3B CONTAINS InterPro DOMAIN/s: Phosphoinositide 3-kina…	scaffold_1	25343713	25356896	13184	+	scaffold_1	25345631	25345960	330	*	0.210997829155028	0.0920678792678641	324.346110711556	0.343194444444444	4.39361147335232	0.011800727731	10.704	-0.317638888888889	0.32625	0.411809523809524	0.0483064516129032	0.511111111111111	0.82875	NO	NO	NO	0.694444444444444	1	B	B	1.93848365726173	-2.11281464631918	-0.779993116502594	-0.956577532853551	2.58211636392626	-1.33724366697713	-0.501733340146232	-0.725212783281918	4.05129830358091	0.176584416350957
AL1G56300	AT1G49340	OG0012588	ATPI4K ALPHA	protein_coding	Phosphatidylinositol 3- and 4-kinase family protein	.	ATPI4K ALPHA%3B FUNCTIONS IN: 1-phosphatidylinositol 4-kinase activity%2C inositol or phosphatidylinositol kinase activity%3B INVOLVED IN: protein amino acid phosphorylation%3B LOCATED IN: plasma membrane%3B EXPRESSED IN: shoot%2C male gametophyte%2C flower%2C pollen tube%3B EXPRESSED DURING: L mature pollen stage%2C M germinated pollen stage%3B CONTAINS InterPro DOMAIN/s: Phosphoinositide 3-kina…	Encodes a phosphatidylinositol 4-kinase that is expressed in inflorescences and shoots.	ATPI4K ALPHA%3B FUNCTIONS IN: 1-phosphatidylinositol 4-kinase activity%2C inositol or phosphatidylinositol kinase activity%3B INVOLVED IN: protein amino acid phosphorylation%3B LOCATED IN: plasma membrane%3B EXPRESSED IN: shoot%2C male gametophyte%2C flower%2C pollen tube%3B EXPRESSED DURING: L mature pollen stage%2C M germinated pollen stage%3B CONTAINS InterPro DOMAIN/s: Phosphoinositide 3-kina…	scaffold_1	25343713	25356896	13184	+	scaffold_1	25345631	25345960	330	*	0.210997829155028	0.0920678792678641	324.346110711556	0.343194444444444	4.39361147335232	0.011800727731	10.704	-0.317638888888889	0.32625	0.411809523809524	0.0483064516129032	0.511111111111111	0.82875	NO	NO	NO	0.694444444444444	1	B	A	1.93848365726173	-2.11281464631918	-0.779993116502594	-0.956577532853551	2.58211636392626	-1.33724366697713	-0.501733340146232	-0.725212783281918	4.05129830358091	0.176584416350957
AL1G56300	AT1G49340	OG0012588	ATPI4K ALPHA	protein_coding	Phosphatidylinositol 3- and 4-kinase family protein	.	ATPI4K ALPHA%3B FUNCTIONS IN: 1-phosphatidylinositol 4-kinase activity%2C inositol or phosphatidylinositol kinase activity%3B INVOLVED IN: protein amino acid phosphorylation%3B LOCATED IN: plasma membrane%3B EXPRESSED IN: shoot%2C male gametophyte%2C flower%2C pollen tube%3B EXPRESSED DURING: L mature pollen stage%2C M germinated pollen stage%3B CONTAINS InterPro DOMAIN/s: Phosphoinositide 3-kina…	Encodes a phosphatidylinositol 4-kinase that is expressed in inflorescences and shoots.	ATPI4K ALPHA%3B FUNCTIONS IN: 1-phosphatidylinositol 4-kinase activity%2C inositol or phosphatidylinositol kinase activity%3B INVOLVED IN: protein amino acid phosphorylation%3B LOCATED IN: plasma membrane%3B EXPRESSED IN: shoot%2C male gametophyte%2C flower%2C pollen tube%3B EXPRESSED DURING: L mature pollen stage%2C M germinated pollen stage%3B CONTAINS InterPro DOMAIN/s: Phosphoinositide 3-kina…	scaffold_1	25343713	25356896	13184	+	scaffold_1	25345201	25345623	423	*	0.171944815249694	0.103325719443936	282.126113242749	0.293819444444444	3.95315417847436	0.0204574931047	5.8895	-0.234166666666667	0.2675	0.395873015873016	0.0417741935483871	0.563333333333333	0.7975	NO	NO	NO	0.694444444444444	1	B	A	3.76047577874803	-2.11281464631918	-1.87961872892324	-0.956577532853551	4.40410848541256	-1.33724366697713	-1.60135895256688	-0.725212783281918	5.87329042506721	-0.923041196069689
AL1G56300	AT1G49340	OG0012588	ATPI4K ALPHA	protein_coding	Phosphatidylinositol 3- and 4-kinase family protein	.	ATPI4K ALPHA%3B FUNCTIONS IN: 1-phosphatidylinositol 4-kinase activity%2C inositol or phosphatidylinositol kinase activity%3B INVOLVED IN: protein amino acid phosphorylation%3B LOCATED IN: plasma membrane%3B EXPRESSED IN: shoot%2C male gametophyte%2C flower%2C pollen tube%3B EXPRESSED DURING: L mature pollen stage%2C M germinated pollen stage%3B CONTAINS InterPro DOMAIN/s: Phosphoinositide 3-kina…	Encodes a phosphatidylinositol 4-kinase that is expressed in inflorescences and shoots.	ATPI4K ALPHA%3B FUNCTIONS IN: 1-phosphatidylinositol 4-kinase activity%2C inositol or phosphatidylinositol kinase activity%3B INVOLVED IN: protein amino acid phosphorylation%3B LOCATED IN: plasma membrane%3B EXPRESSED IN: shoot%2C male gametophyte%2C flower%2C pollen tube%3B EXPRESSED DURING: L mature pollen stage%2C M germinated pollen stage%3B CONTAINS InterPro DOMAIN/s: Phosphoinositide 3-kina…	scaffold_1	25343713	25356896	13184	+	scaffold_1	25345631	25345960	330	*	0.210997829155028	0.0920678792678641	324.346110711556	0.343194444444444	4.39361147335232	0.011800727731	10.704	-0.317638888888889	0.32625	0.411809523809524	0.0483064516129032	0.511111111111111	0.82875	NO	NO	NO	0.694444444444444	1	C	B	1.93848365726173	-2.11281464631918	-0.779993116502594	-0.956577532853551	2.58211636392626	-1.33724366697713	-0.501733340146232	-0.725212783281918	4.05129830358091	0.176584416350957
AL1G56300	AT1G49340	OG0012588	ATPI4K ALPHA	protein_coding	Phosphatidylinositol 3- and 4-kinase family protein	.	ATPI4K ALPHA%3B FUNCTIONS IN: 1-phosphatidylinositol 4-kinase activity%2C inositol or phosphatidylinositol kinase activity%3B INVOLVED IN: protein amino acid phosphorylation%3B LOCATED IN: plasma membrane%3B EXPRESSED IN: shoot%2C male gametophyte%2C flower%2C pollen tube%3B EXPRESSED DURING: L mature pollen stage%2C M germinated pollen stage%3B CONTAINS InterPro DOMAIN/s: Phosphoinositide 3-kina…	Encodes a phosphatidylinositol 4-kinase that is expressed in inflorescences and shoots.	ATPI4K ALPHA%3B FUNCTIONS IN: 1-phosphatidylinositol 4-kinase activity%2C inositol or phosphatidylinositol kinase activity%3B INVOLVED IN: protein amino acid phosphorylation%3B LOCATED IN: plasma membrane%3B EXPRESSED IN: shoot%2C male gametophyte%2C flower%2C pollen tube%3B EXPRESSED DURING: L mature pollen stage%2C M germinated pollen stage%3B CONTAINS InterPro DOMAIN/s: Phosphoinositide 3-kina…	scaffold_1	25343713	25356896	13184	+	scaffold_1	25348752	25349307	556	*	0.150028485835908	0.0782832557788337	252.559396427994	0.249097222222222	3.53260451501836	0.0204574931047	5.566	-0.182222222222222	0.228055555555556	0.348952380952381	0.0353225806451613	0.557777777777778	0.74	NO	MODERATE	NO	0.694444444444444	1	C	B	1.8433641182904	-1.90412850366957	-1.51657010943787	0.16694019042305	2.48699682495493	-1.12855752432752	-1.23831033308151	0.398304939994683	3.74749262195997	-1.68351029986092
AL1G56300	AT1G49340	OG0012588	ATPI4K ALPHA	protein_coding	Phosphatidylinositol 3- and 4-kinase family protein	.	ATPI4K ALPHA%3B FUNCTIONS IN: 1-phosphatidylinositol 4-kinase activity%2C inositol or phosphatidylinositol kinase activity%3B INVOLVED IN: protein amino acid phosphorylation%3B LOCATED IN: plasma membrane%3B EXPRESSED IN: shoot%2C male gametophyte%2C flower%2C pollen tube%3B EXPRESSED DURING: L mature pollen stage%2C M germinated pollen stage%3B CONTAINS InterPro DOMAIN/s: Phosphoinositide 3-kina…	Encodes a phosphatidylinositol 4-kinase that is expressed in inflorescences and shoots.	ATPI4K ALPHA%3B FUNCTIONS IN: 1-phosphatidylinositol 4-kinase activity%2C inositol or phosphatidylinositol kinase activity%3B INVOLVED IN: protein amino acid phosphorylation%3B LOCATED IN: plasma membrane%3B EXPRESSED IN: shoot%2C male gametophyte%2C flower%2C pollen tube%3B EXPRESSED DURING: L mature pollen stage%2C M germinated pollen stage%3B CONTAINS InterPro DOMAIN/s: Phosphoinositide 3-kina…	scaffold_1	25343713	25356896	13184	+	scaffold_1	25348752	25349307	556	*	0.150028485835908	0.0782832557788337	252.559396427994	0.249097222222222	3.53260451501836	0.0204574931047	5.566	-0.182222222222222	0.228055555555556	0.348952380952381	0.0353225806451613	0.557777777777778	0.74	NO	NO	NO	0.694444444444444	1	B	B	1.8433641182904	-1.90412850366957	-1.51657010943787	0.16694019042305	2.48699682495493	-1.12855752432752	-1.23831033308151	0.398304939994683	3.74749262195997	-1.68351029986092
AL1G66480	AT1G56590	OG0013179	ZIP4	protein_coding	Clathrin adaptor complexes medium subunit family protein	ZIG SUPPRESSOR 4	ZIG SUPPRESSOR 4 (ZIP4)%3B INVOLVED IN: intracellular protein transport%2C gravitropism%2C protein targeting to vacuole%3B LOCATED IN: clathrin vesicle coat%2C clathrin adaptor complex%3B EXPRESSED IN: 23 plant structures%3B EXPRESSED DURING: 15 growth stages%3B CONTAINS InterPro DOMAIN/s: Clathrin adaptor%2C mu subunit%2C conserved site (InterPro:IPR018240)%2C Clathrin adaptor%2C mu subunit (Int…	Involved in vesicle trafficking between the trans -Golgi network and vacuoles.	ZIG SUPPRESSOR 4 (ZIP4)%3B INVOLVED IN: intracellular protein transport%2C gravitropism%2C protein targeting to vacuole%3B LOCATED IN: clathrin vesicle coat%2C clathrin adaptor complex%3B EXPRESSED IN: 23 plant structures%3B EXPRESSED DURING: 15 growth stages%3B CONTAINS InterPro DOMAIN/s: Clathrin adaptor%2C mu subunit%2C conserved site (InterPro:IPR018240)%2C Clathrin adaptor%2C mu subunit (Int…	scaffold_1	32577278	32580082	2805	-	scaffold_1	32579842	32580062	221	*	0.177378946106462	0.0171742449508554	265.555767745649	0.409027777777778	2.62994112529166	0.00928877659294	8.0796	-0.0206944444444445	0.339305555555556	0.334920634920635	0.184112903225806	0.325555555555556	0.34625	NO	NO	NO	NO	NO	B	B	0.611339613519055	-1.75272875311985	0.256005418276281	0.362557223372762	1.25497232018359	-0.977157773777799	0.534265194632643	0.593921972944395	2.36406836663891	-0.106551805096481
AL1G66480	AT1G56590	OG0013179	ZIP4	protein_coding	Clathrin adaptor complexes medium subunit family protein	ZIG SUPPRESSOR 4	ZIG SUPPRESSOR 4 (ZIP4)%3B INVOLVED IN: intracellular protein transport%2C gravitropism%2C protein targeting to vacuole%3B LOCATED IN: clathrin vesicle coat%2C clathrin adaptor complex%3B EXPRESSED IN: 23 plant structures%3B EXPRESSED DURING: 15 growth stages%3B CONTAINS InterPro DOMAIN/s: Clathrin adaptor%2C mu subunit%2C conserved site (InterPro:IPR018240)%2C Clathrin adaptor%2C mu subunit (Int…	Involved in vesicle trafficking between the trans -Golgi network and vacuoles.	ZIG SUPPRESSOR 4 (ZIP4)%3B INVOLVED IN: intracellular protein transport%2C gravitropism%2C protein targeting to vacuole%3B LOCATED IN: clathrin vesicle coat%2C clathrin adaptor complex%3B EXPRESSED IN: 23 plant structures%3B EXPRESSED DURING: 15 growth stages%3B CONTAINS InterPro DOMAIN/s: Clathrin adaptor%2C mu subunit%2C conserved site (InterPro:IPR018240)%2C Clathrin adaptor%2C mu subunit (Int…	scaffold_1	32577278	32580082	2805	-	scaffold_1	32579842	32580062	221	*	0.177378946106462	0.0171742449508554	265.555767745649	0.409027777777778	2.62994112529166	0.00928877659294	8.0796	-0.0206944444444445	0.339305555555556	0.334920634920635	0.184112903225806	0.325555555555556	0.34625	NO	NO	NO	NO	NO	C	B	0.611339613519055	-1.75272875311985	0.256005418276281	0.362557223372762	1.25497232018359	-0.977157773777799	0.534265194632643	0.593921972944395	2.36406836663891	-0.106551805096481
AL2G12590	AT1G63010	OG0014421	.	protein_coding	Major Facilitator Superfamily with SPX (SYG1/Pho81/XPR1) domain-containing protein	.	Major Facilitator Superfamily with SPX (SYG1/Pho81/XPR1) domain-containing protein%3B INVOLVED IN: transmembrane transport%3B LOCATED IN: vacuolar membrane%2C plant-type vacuole%3B EXPRESSED IN: 25 plant structures%3B EXPRESSED DURING: 13 growth stages%3B CONTAINS InterPro DOMAIN/s: SPX%2C N-terminal (InterPro:IPR004331)%2C Major facilitator superfamily MFS-1 (InterPro:IPR011701)%2C Major facilit…	.	Major Facilitator Superfamily with SPX (SYG1/Pho81/XPR1) domain-containing protein%3B INVOLVED IN: transmembrane transport%3B LOCATED IN: vacuolar membrane%2C plant-type vacuole%3B EXPRESSED IN: 25 plant structures%3B EXPRESSED DURING: 13 growth stages%3B CONTAINS InterPro DOMAIN/s: SPX%2C N-terminal (InterPro:IPR004331)%2C Major facilitator superfamily MFS-1 (InterPro:IPR011701)%2C Major facilit…	scaffold_2	1289828	1294721	4894	+	scaffold_2	1292985	1293336	352	*	0.11324157039782	0.00941055251658908	236.950432561149	0.437916666666667	1.51014914252356	0.0488402146508	5.5962	0.257777777777778	0.296666666666667	0.305650793650794	0.356129032258065	0.577777777777778	0.32	NO	NO	NO	NO	NO	B	A	0.661164133932605	2.38553109523909	-4.02272841466886	1.01188287201211	1.30479684059714	3.16110207458114	-3.7444686383125	1.24324762158374	-1.72436696130648	-5.03461128668097
AL2G12590	AT1G63010	OG0014421	.	protein_coding	Major Facilitator Superfamily with SPX (SYG1/Pho81/XPR1) domain-containing protein	.	Major Facilitator Superfamily with SPX (SYG1/Pho81/XPR1) domain-containing protein%3B INVOLVED IN: transmembrane transport%3B LOCATED IN: vacuolar membrane%2C plant-type vacuole%3B EXPRESSED IN: 25 plant structures%3B EXPRESSED DURING: 13 growth stages%3B CONTAINS InterPro DOMAIN/s: SPX%2C N-terminal (InterPro:IPR004331)%2C Major facilitator superfamily MFS-1 (InterPro:IPR011701)%2C Major facilit…	.	Major Facilitator Superfamily with SPX (SYG1/Pho81/XPR1) domain-containing protein%3B INVOLVED IN: transmembrane transport%3B LOCATED IN: vacuolar membrane%2C plant-type vacuole%3B EXPRESSED IN: 25 plant structures%3B EXPRESSED DURING: 13 growth stages%3B CONTAINS InterPro DOMAIN/s: SPX%2C N-terminal (InterPro:IPR004331)%2C Major facilitator superfamily MFS-1 (InterPro:IPR011701)%2C Major facilit…	scaffold_2	1289828	1294721	4894	+	scaffold_2	1291649	1292136	488	*	0.193187517286647	-0.0378237559233162	306.907129519643	0.492083333333333	2.23647547085364	0.0340774772445	6.9487	0.354305555555556	0.394305555555556	0.300444444444444	0.304435483870968	0.595555555555556	0.24125	NO	MODERATE	NO	NO	NO	C	A	0.605677736199338	0.766508537558788	-3.37223511501362	1.18906479190897	1.24931044286387	1.54207951690084	-3.09397533865726	1.4204295414806	-0.16083080135945	-4.56129990692259
AL2G12590	AT1G63010	OG0014421	.	protein_coding	Major Facilitator Superfamily with SPX (SYG1/Pho81/XPR1) domain-containing protein	.	Major Facilitator Superfamily with SPX (SYG1/Pho81/XPR1) domain-containing protein%3B INVOLVED IN: transmembrane transport%3B LOCATED IN: vacuolar membrane%2C plant-type vacuole%3B EXPRESSED IN: 25 plant structures%3B EXPRESSED DURING: 13 growth stages%3B CONTAINS InterPro DOMAIN/s: SPX%2C N-terminal (InterPro:IPR004331)%2C Major facilitator superfamily MFS-1 (InterPro:IPR011701)%2C Major facilit…	.	Major Facilitator Superfamily with SPX (SYG1/Pho81/XPR1) domain-containing protein%3B INVOLVED IN: transmembrane transport%3B LOCATED IN: vacuolar membrane%2C plant-type vacuole%3B EXPRESSED IN: 25 plant structures%3B EXPRESSED DURING: 13 growth stages%3B CONTAINS InterPro DOMAIN/s: SPX%2C N-terminal (InterPro:IPR004331)%2C Major facilitator superfamily MFS-1 (InterPro:IPR011701)%2C Major facilit…	scaffold_2	1289828	1294721	4894	+	scaffold_2	1291649	1292136	488	*	0.193187517286647	-0.0378237559233162	306.907129519643	0.492083333333333	2.23647547085364	0.0340774772445	6.9487	0.354305555555556	0.394305555555556	0.300444444444444	0.304435483870968	0.595555555555556	0.24125	NO	NO	NO	NO	NO	B	A	0.605677736199338	0.766508537558788	-3.37223511501362	1.18906479190897	1.24931044286387	1.54207951690084	-3.09397533865726	1.4204295414806	-0.16083080135945	-4.56129990692259
AL2G12590	AT1G63010	OG0014421	.	protein_coding	Major Facilitator Superfamily with SPX (SYG1/Pho81/XPR1) domain-containing protein	.	Major Facilitator Superfamily with SPX (SYG1/Pho81/XPR1) domain-containing protein%3B INVOLVED IN: transmembrane transport%3B LOCATED IN: vacuolar membrane%2C plant-type vacuole%3B EXPRESSED IN: 25 plant structures%3B EXPRESSED DURING: 13 growth stages%3B CONTAINS InterPro DOMAIN/s: SPX%2C N-terminal (InterPro:IPR004331)%2C Major facilitator superfamily MFS-1 (InterPro:IPR011701)%2C Major facilit…	.	Major Facilitator Superfamily with SPX (SYG1/Pho81/XPR1) domain-containing protein%3B INVOLVED IN: transmembrane transport%3B LOCATED IN: vacuolar membrane%2C plant-type vacuole%3B EXPRESSED IN: 25 plant structures%3B EXPRESSED DURING: 13 growth stages%3B CONTAINS InterPro DOMAIN/s: SPX%2C N-terminal (InterPro:IPR004331)%2C Major facilitator superfamily MFS-1 (InterPro:IPR011701)%2C Major facilit…	scaffold_2	1289828	1294721	4894	+	scaffold_2	1293707	1294071	365	*	0.0997113006729543	0.0216369180297655	235.477868960146	0.425555555555556	1.30938804192288	0.0134814066274	9.1258	0.216388888888889	0.263888888888889	0.303365079365079	0.387741935483871	0.568888888888889	0.3525	NO	NO	NO	NO	NO	B	A	1.39041393271271	2.76880433762171	-3.4867638547688	0.300082673582539	2.03404663937724	3.54437531696376	-3.20850407841244	0.531447423154172	-1.378390404909	-3.78684652835134
AL2G12590	AT1G63010	OG0014421	.	protein_coding	Major Facilitator Superfamily with SPX (SYG1/Pho81/XPR1) domain-containing protein	.	Major Facilitator Superfamily with SPX (SYG1/Pho81/XPR1) domain-containing protein%3B INVOLVED IN: transmembrane transport%3B LOCATED IN: vacuolar membrane%2C plant-type vacuole%3B EXPRESSED IN: 25 plant structures%3B EXPRESSED DURING: 13 growth stages%3B CONTAINS InterPro DOMAIN/s: SPX%2C N-terminal (InterPro:IPR004331)%2C Major facilitator superfamily MFS-1 (InterPro:IPR011701)%2C Major facilit…	.	Major Facilitator Superfamily with SPX (SYG1/Pho81/XPR1) domain-containing protein%3B INVOLVED IN: transmembrane transport%3B LOCATED IN: vacuolar membrane%2C plant-type vacuole%3B EXPRESSED IN: 25 plant structures%3B EXPRESSED DURING: 13 growth stages%3B CONTAINS InterPro DOMAIN/s: SPX%2C N-terminal (InterPro:IPR004331)%2C Major facilitator superfamily MFS-1 (InterPro:IPR011701)%2C Major facilit…	scaffold_2	1289828	1294721	4894	+	scaffold_2	1291649	1292136	488	*	0.193187517286647	-0.0378237559233162	306.907129519643	0.492083333333333	2.23647547085364	0.0340774772445	6.9487	0.354305555555556	0.394305555555556	0.300444444444444	0.304435483870968	0.595555555555556	0.24125	NO	NO	NO	NO	NO	C	A	0.605677736199338	0.766508537558788	-3.37223511501362	1.18906479190897	1.24931044286387	1.54207951690084	-3.09397533865726	1.4204295414806	-0.16083080135945	-4.56129990692259
AL2G12590	AT1G63010	OG0014421	.	protein_coding	Major Facilitator Superfamily with SPX (SYG1/Pho81/XPR1) domain-containing protein	.	Major Facilitator Superfamily with SPX (SYG1/Pho81/XPR1) domain-containing protein%3B INVOLVED IN: transmembrane transport%3B LOCATED IN: vacuolar membrane%2C plant-type vacuole%3B EXPRESSED IN: 25 plant structures%3B EXPRESSED DURING: 13 growth stages%3B CONTAINS InterPro DOMAIN/s: SPX%2C N-terminal (InterPro:IPR004331)%2C Major facilitator superfamily MFS-1 (InterPro:IPR011701)%2C Major facilit…	.	Major Facilitator Superfamily with SPX (SYG1/Pho81/XPR1) domain-containing protein%3B INVOLVED IN: transmembrane transport%3B LOCATED IN: vacuolar membrane%2C plant-type vacuole%3B EXPRESSED IN: 25 plant structures%3B EXPRESSED DURING: 13 growth stages%3B CONTAINS InterPro DOMAIN/s: SPX%2C N-terminal (InterPro:IPR004331)%2C Major facilitator superfamily MFS-1 (InterPro:IPR011701)%2C Major facilit…	scaffold_2	1289828	1294721	4894	+	scaffold_2	1291649	1292136	488	*	0.193187517286647	-0.0378237559233162	306.907129519643	0.492083333333333	2.23647547085364	0.0340774772445	6.9487	0.354305555555556	0.394305555555556	0.300444444444444	0.304435483870968	0.595555555555556	0.24125	NO	NO	NO	NO	NO	B	A	0.605677736199338	0.766508537558788	-3.37223511501362	1.18906479190897	1.24931044286387	1.54207951690084	-3.09397533865726	1.4204295414806	-0.16083080135945	-4.56129990692259
AL2G12590	AT1G63010	OG0014421	.	protein_coding	Major Facilitator Superfamily with SPX (SYG1/Pho81/XPR1) domain-containing protein	.	Major Facilitator Superfamily with SPX (SYG1/Pho81/XPR1) domain-containing protein%3B INVOLVED IN: transmembrane transport%3B LOCATED IN: vacuolar membrane%2C plant-type vacuole%3B EXPRESSED IN: 25 plant structures%3B EXPRESSED DURING: 13 growth stages%3B CONTAINS InterPro DOMAIN/s: SPX%2C N-terminal (InterPro:IPR004331)%2C Major facilitator superfamily MFS-1 (InterPro:IPR011701)%2C Major facilit…	.	Major Facilitator Superfamily with SPX (SYG1/Pho81/XPR1) domain-containing protein%3B INVOLVED IN: transmembrane transport%3B LOCATED IN: vacuolar membrane%2C plant-type vacuole%3B EXPRESSED IN: 25 plant structures%3B EXPRESSED DURING: 13 growth stages%3B CONTAINS InterPro DOMAIN/s: SPX%2C N-terminal (InterPro:IPR004331)%2C Major facilitator superfamily MFS-1 (InterPro:IPR011701)%2C Major facilit…	scaffold_2	1289828	1294721	4894	+	scaffold_2	1293345	1293662	318	*	0.151173710584	-0.0756900076441881	254.720508979426	0.410208333333333	2.0493332352906	0.00678181000201	14.8849	0.235	0.320555555555556	0.222666666666667	0.341129032258065	0.49	0.255	NO	MODERATE	NO	NO	NO	C	A	0.0428871306190547	1.26708248757451	-2.84151043209583	0.925852344432132	0.686519837283586	2.04265346691656	-2.56325065573947	1.15721709400377	-1.22419535695546	-3.76736277652796
AL2G12590	AT1G63010	OG0014421	.	protein_coding	Major Facilitator Superfamily with SPX (SYG1/Pho81/XPR1) domain-containing protein	.	Major Facilitator Superfamily with SPX (SYG1/Pho81/XPR1) domain-containing protein%3B INVOLVED IN: transmembrane transport%3B LOCATED IN: vacuolar membrane%2C plant-type vacuole%3B EXPRESSED IN: 25 plant structures%3B EXPRESSED DURING: 13 growth stages%3B CONTAINS InterPro DOMAIN/s: SPX%2C N-terminal (InterPro:IPR004331)%2C Major facilitator superfamily MFS-1 (InterPro:IPR011701)%2C Major facilit…	.	Major Facilitator Superfamily with SPX (SYG1/Pho81/XPR1) domain-containing protein%3B INVOLVED IN: transmembrane transport%3B LOCATED IN: vacuolar membrane%2C plant-type vacuole%3B EXPRESSED IN: 25 plant structures%3B EXPRESSED DURING: 13 growth stages%3B CONTAINS InterPro DOMAIN/s: SPX%2C N-terminal (InterPro:IPR004331)%2C Major facilitator superfamily MFS-1 (InterPro:IPR011701)%2C Major facilit…	scaffold_2	1289828	1294721	4894	+	scaffold_2	1293345	1293662	318	*	0.151173710584	-0.0756900076441881	254.720508979426	0.410208333333333	2.0493332352906	0.00678181000201	14.8849	0.235	0.320555555555556	0.222666666666667	0.341129032258065	0.49	0.255	NO	NO	NO	NO	NO	B	A	0.0428871306190547	1.26708248757451	-2.84151043209583	0.925852344432132	0.686519837283586	2.04265346691656	-2.56325065573947	1.15721709400377	-1.22419535695546	-3.76736277652796
AL2G12590	AT1G63010	OG0014421	.	protein_coding	Major Facilitator Superfamily with SPX (SYG1/Pho81/XPR1) domain-containing protein	.	Major Facilitator Superfamily with SPX (SYG1/Pho81/XPR1) domain-containing protein%3B INVOLVED IN: transmembrane transport%3B LOCATED IN: vacuolar membrane%2C plant-type vacuole%3B EXPRESSED IN: 25 plant structures%3B EXPRESSED DURING: 13 growth stages%3B CONTAINS InterPro DOMAIN/s: SPX%2C N-terminal (InterPro:IPR004331)%2C Major facilitator superfamily MFS-1 (InterPro:IPR011701)%2C Major facilit…	.	Major Facilitator Superfamily with SPX (SYG1/Pho81/XPR1) domain-containing protein%3B INVOLVED IN: transmembrane transport%3B LOCATED IN: vacuolar membrane%2C plant-type vacuole%3B EXPRESSED IN: 25 plant structures%3B EXPRESSED DURING: 13 growth stages%3B CONTAINS InterPro DOMAIN/s: SPX%2C N-terminal (InterPro:IPR004331)%2C Major facilitator superfamily MFS-1 (InterPro:IPR011701)%2C Major facilit…	scaffold_2	1289828	1294721	4894	+	scaffold_2	1292985	1293336	352	*	0.11324157039782	0.00941055251658908	236.950432561149	0.437916666666667	1.51014914252356	0.0488402146508	5.5962	0.257777777777778	0.296666666666667	0.305650793650794	0.356129032258065	0.577777777777778	0.32	NO	NO	NO	NO	NO	B	A	0.661164133932605	2.38553109523909	-4.02272841466886	1.01188287201211	1.30479684059714	3.16110207458114	-3.7444686383125	1.24324762158374	-1.72436696130648	-5.03461128668097
AL2G15150	AT1G61210	OG0015034	DWA3	protein_coding	Transducin/WD40 repeat-like superfamily protein	DWD hypersensitive to ABA 3	Transducin/WD40 repeat-like superfamily protein%3B CONTAINS InterPro DOMAIN/s: WD40 repeat 2 (InterPro:IPR019782)%2C WD40 repeat%2C conserved site (InterPro:IPR019775)%2C WD40 repeat (InterPro:IPR001680)%2C G-protein beta WD-40 repeat%2C region (InterPro:IPR020472)%2C WD40 repeat-like-containing domain (InterPro:IPR011046)%2C WD40-repeat-containing domain (InterPro:IPR017986)%2C WD40/YVTN repeat-…	DWA3 encodes a DWD(DDB1 binding WD40) protein. Invitro analyses suggest its involvement in the negative regulation of ABA responses.	Transducin/WD40 repeat-like superfamily protein%3B CONTAINS InterPro DOMAIN/s: WD40 repeat 2 (InterPro:IPR019782)%2C WD40 repeat%2C conserved site (InterPro:IPR019775)%2C WD40 repeat (InterPro:IPR001680)%2C G-protein beta WD-40 repeat%2C region (InterPro:IPR020472)%2C WD40 repeat-like-containing domain (InterPro:IPR011046)%2C WD40-repeat-containing domain (InterPro:IPR017986)%2C WD40/YVTN repeat-…	scaffold_2	2599023	2606528	7506	-	scaffold_2	2603663	2604302	640	*	0.193377370796274	-0.174150159830073	245.397479925537	0.341944444444444	4.91497727905569	0.00678181000201	0.7737	0.0472222222222222	0.292222222222222	0.0995555555555555	0.39741935483871	0.502222222222222	0.455	NO	NO	NO	0	0.09375	C	B	-1.02834005827223	2.30096546880591	0.0074855385460886	-0.32978368905658	-0.384707351607698	3.07653644814796	0.28574531490245	-0.0984189394849468	-3.32930552707814	0.337269227602669
AL2G15150	AT1G61210	OG0015034	DWA3	protein_coding	Transducin/WD40 repeat-like superfamily protein	DWD hypersensitive to ABA 3	Transducin/WD40 repeat-like superfamily protein%3B CONTAINS InterPro DOMAIN/s: WD40 repeat 2 (InterPro:IPR019782)%2C WD40 repeat%2C conserved site (InterPro:IPR019775)%2C WD40 repeat (InterPro:IPR001680)%2C G-protein beta WD-40 repeat%2C region (InterPro:IPR020472)%2C WD40 repeat-like-containing domain (InterPro:IPR011046)%2C WD40-repeat-containing domain (InterPro:IPR017986)%2C WD40/YVTN repeat-…	DWA3 encodes a DWD(DDB1 binding WD40) protein. Invitro analyses suggest its involvement in the negative regulation of ABA responses.	Transducin/WD40 repeat-like superfamily protein%3B CONTAINS InterPro DOMAIN/s: WD40 repeat 2 (InterPro:IPR019782)%2C WD40 repeat%2C conserved site (InterPro:IPR019775)%2C WD40 repeat (InterPro:IPR001680)%2C G-protein beta WD-40 repeat%2C region (InterPro:IPR020472)%2C WD40 repeat-like-containing domain (InterPro:IPR011046)%2C WD40-repeat-containing domain (InterPro:IPR017986)%2C WD40/YVTN repeat-…	scaffold_2	2599023	2606528	7506	-	scaffold_2	2603124	2603637	514	*	0.218535511110768	-0.234696650034018	290.052690397476	0.326736111111111	6.11512999046328	0.00678181000201	0.0403	0.155138888888889	0.305138888888889	0.0385396825396825	0.423306451612903	0.678888888888889	0.52375	NO	NO	NO	0	0.09375	C	B	-1.83232663767264	2.44418144905565	-0.0928206779715196	-1.12351772327661	-1.18869393100811	3.2197524283977	0.185439098384842	-0.892152973704977	-4.27650808672829	1.03069704530509
AL2G15150	AT1G61210	OG0015034	DWA3	protein_coding	Transducin/WD40 repeat-like superfamily protein	DWD hypersensitive to ABA 3	Transducin/WD40 repeat-like superfamily protein%3B CONTAINS InterPro DOMAIN/s: WD40 repeat 2 (InterPro:IPR019782)%2C WD40 repeat%2C conserved site (InterPro:IPR019775)%2C WD40 repeat (InterPro:IPR001680)%2C G-protein beta WD-40 repeat%2C region (InterPro:IPR020472)%2C WD40 repeat-like-containing domain (InterPro:IPR011046)%2C WD40-repeat-containing domain (InterPro:IPR017986)%2C WD40/YVTN repeat-…	DWA3 encodes a DWD(DDB1 binding WD40) protein. Invitro analyses suggest its involvement in the negative regulation of ABA responses.	Transducin/WD40 repeat-like superfamily protein%3B CONTAINS InterPro DOMAIN/s: WD40 repeat 2 (InterPro:IPR019782)%2C WD40 repeat%2C conserved site (InterPro:IPR019775)%2C WD40 repeat (InterPro:IPR001680)%2C G-protein beta WD-40 repeat%2C region (InterPro:IPR020472)%2C WD40 repeat-like-containing domain (InterPro:IPR011046)%2C WD40-repeat-containing domain (InterPro:IPR017986)%2C WD40/YVTN repeat-…	scaffold_2	2599023	2606528	7506	-	scaffold_2	2605659	2605997	339	*	0.194067331211983	-0.234645323299079	241.740088684305	0.277777777777778	5.1815588519664	0.00678181000201	1.7949	0.0527777777777778	0.267777777777778	0.0205079365079365	0.373225806451613	0.507777777777778	0.455	NO	NO	NO	0	0.09375	C	B	-3.36782776678105	0.736501379792161	-0.407213296907303	0.281647560529684	-2.72419506011652	1.51207235913421	-0.128953520550941	0.513012310101317	-4.10432914657321	-0.688860857436987
AL2G15150	AT1G61210	OG0015034	DWA3	protein_coding	Transducin/WD40 repeat-like superfamily protein	DWD hypersensitive to ABA 3	Transducin/WD40 repeat-like superfamily protein%3B CONTAINS InterPro DOMAIN/s: WD40 repeat 2 (InterPro:IPR019782)%2C WD40 repeat%2C conserved site (InterPro:IPR019775)%2C WD40 repeat (InterPro:IPR001680)%2C G-protein beta WD-40 repeat%2C region (InterPro:IPR020472)%2C WD40 repeat-like-containing domain (InterPro:IPR011046)%2C WD40-repeat-containing domain (InterPro:IPR017986)%2C WD40/YVTN repeat-…	DWA3 encodes a DWD(DDB1 binding WD40) protein. Invitro analyses suggest its involvement in the negative regulation of ABA responses.	Transducin/WD40 repeat-like superfamily protein%3B CONTAINS InterPro DOMAIN/s: WD40 repeat 2 (InterPro:IPR019782)%2C WD40 repeat%2C conserved site (InterPro:IPR019775)%2C WD40 repeat (InterPro:IPR001680)%2C G-protein beta WD-40 repeat%2C region (InterPro:IPR020472)%2C WD40 repeat-like-containing domain (InterPro:IPR011046)%2C WD40-repeat-containing domain (InterPro:IPR017986)%2C WD40/YVTN repeat-…	scaffold_2	2599023	2606528	7506	-	scaffold_2	2603663	2604302	640	*	0.193377370796274	-0.174150159830073	245.397479925537	0.341944444444444	4.91497727905569	0.00678181000201	0.7737	0.0472222222222222	0.292222222222222	0.0995555555555555	0.39741935483871	0.502222222222222	0.455	NO	NO	NO	0	0.09375	C	B	-1.02834005827223	2.30096546880591	0.0074855385460886	-0.32978368905658	-0.384707351607698	3.07653644814796	0.28574531490245	-0.0984189394849468	-3.32930552707814	0.337269227602669
AL2G15150	AT1G61210	OG0015034	DWA3	protein_coding	Transducin/WD40 repeat-like superfamily protein	DWD hypersensitive to ABA 3	Transducin/WD40 repeat-like superfamily protein%3B CONTAINS InterPro DOMAIN/s: WD40 repeat 2 (InterPro:IPR019782)%2C WD40 repeat%2C conserved site (InterPro:IPR019775)%2C WD40 repeat (InterPro:IPR001680)%2C G-protein beta WD-40 repeat%2C region (InterPro:IPR020472)%2C WD40 repeat-like-containing domain (InterPro:IPR011046)%2C WD40-repeat-containing domain (InterPro:IPR017986)%2C WD40/YVTN repeat-…	DWA3 encodes a DWD(DDB1 binding WD40) protein. Invitro analyses suggest its involvement in the negative regulation of ABA responses.	Transducin/WD40 repeat-like superfamily protein%3B CONTAINS InterPro DOMAIN/s: WD40 repeat 2 (InterPro:IPR019782)%2C WD40 repeat%2C conserved site (InterPro:IPR019775)%2C WD40 repeat (InterPro:IPR001680)%2C G-protein beta WD-40 repeat%2C region (InterPro:IPR020472)%2C WD40 repeat-like-containing domain (InterPro:IPR011046)%2C WD40-repeat-containing domain (InterPro:IPR017986)%2C WD40/YVTN repeat-…	scaffold_2	2599023	2606528	7506	-	scaffold_2	2605336	2605654	319	*	0.124388316441373	0.0543722583974911	258.156577251715	0.440416666666667	2.3062321037688	0.00678181000201	10.6518	0.18125	0.259583333333333	0.337650793650794	0.393951612903226	0.48	0.29875	NO	NO	NO	0	0.09375	C	B	0.692870646923049	2.11273875190627	0.0134739693829606	-1.22491084506729	1.33650335358758	2.88830973124832	0.291733745739322	-0.993546095495657	-1.41986810498322	1.23838481445025
AL2G15150	AT1G61210	OG0015034	DWA3	protein_coding	Transducin/WD40 repeat-like superfamily protein	DWD hypersensitive to ABA 3	Transducin/WD40 repeat-like superfamily protein%3B CONTAINS InterPro DOMAIN/s: WD40 repeat 2 (InterPro:IPR019782)%2C WD40 repeat%2C conserved site (InterPro:IPR019775)%2C WD40 repeat (InterPro:IPR001680)%2C G-protein beta WD-40 repeat%2C region (InterPro:IPR020472)%2C WD40 repeat-like-containing domain (InterPro:IPR011046)%2C WD40-repeat-containing domain (InterPro:IPR017986)%2C WD40/YVTN repeat-…	DWA3 encodes a DWD(DDB1 binding WD40) protein. Invitro analyses suggest its involvement in the negative regulation of ABA responses.	Transducin/WD40 repeat-like superfamily protein%3B CONTAINS InterPro DOMAIN/s: WD40 repeat 2 (InterPro:IPR019782)%2C WD40 repeat%2C conserved site (InterPro:IPR019775)%2C WD40 repeat (InterPro:IPR001680)%2C G-protein beta WD-40 repeat%2C region (InterPro:IPR020472)%2C WD40 repeat-like-containing domain (InterPro:IPR011046)%2C WD40-repeat-containing domain (InterPro:IPR017986)%2C WD40/YVTN repeat-…	scaffold_2	2599023	2606528	7506	-	scaffold_2	2606000	2608569	2570	*	0.136499387609172	-0.190458821653691	159.942918773857	0.205694444444444	3.35128315833576	0.00678181000201	2.468	0.0741666666666667	0.189722222222222	0.0318095238095238	0.253064516129032	0.296666666666667	0.2225	NO	NO	NO	0	0.09375	C	B	-3.36782776678105	-2.80434323666789	-0.407213296907303	0.474192074637254	-2.72419506011652	-2.02877225732584	-0.128953520550941	0.705556824208887	-0.56348453011316	-0.881405371544557
AL2G15150	AT1G61210	OG0015034	DWA3	protein_coding	Transducin/WD40 repeat-like superfamily protein	DWD hypersensitive to ABA 3	Transducin/WD40 repeat-like superfamily protein%3B CONTAINS InterPro DOMAIN/s: WD40 repeat 2 (InterPro:IPR019782)%2C WD40 repeat%2C conserved site (InterPro:IPR019775)%2C WD40 repeat (InterPro:IPR001680)%2C G-protein beta WD-40 repeat%2C region (InterPro:IPR020472)%2C WD40 repeat-like-containing domain (InterPro:IPR011046)%2C WD40-repeat-containing domain (InterPro:IPR017986)%2C WD40/YVTN repeat-…	DWA3 encodes a DWD(DDB1 binding WD40) protein. Invitro analyses suggest its involvement in the negative regulation of ABA responses.	Transducin/WD40 repeat-like superfamily protein%3B CONTAINS InterPro DOMAIN/s: WD40 repeat 2 (InterPro:IPR019782)%2C WD40 repeat%2C conserved site (InterPro:IPR019775)%2C WD40 repeat (InterPro:IPR001680)%2C G-protein beta WD-40 repeat%2C region (InterPro:IPR020472)%2C WD40 repeat-like-containing domain (InterPro:IPR011046)%2C WD40-repeat-containing domain (InterPro:IPR017986)%2C WD40/YVTN repeat-…	scaffold_2	2599023	2606528	7506	-	scaffold_2	2603124	2603637	514	*	0.218535511110768	-0.234696650034018	290.052690397476	0.326736111111111	6.11512999046328	0.00678181000201	0.0403	0.155138888888889	0.305138888888889	0.0385396825396825	0.423306451612903	0.678888888888889	0.52375	NO	NO	NO	0	0.09375	C	B	-1.83232663767264	2.44418144905565	-0.0928206779715196	-1.12351772327661	-1.18869393100811	3.2197524283977	0.185439098384842	-0.892152973704977	-4.27650808672829	1.03069704530509
AL2G15150	AT1G61210	OG0015034	DWA3	protein_coding	Transducin/WD40 repeat-like superfamily protein	DWD hypersensitive to ABA 3	Transducin/WD40 repeat-like superfamily protein%3B CONTAINS InterPro DOMAIN/s: WD40 repeat 2 (InterPro:IPR019782)%2C WD40 repeat%2C conserved site (InterPro:IPR019775)%2C WD40 repeat (InterPro:IPR001680)%2C G-protein beta WD-40 repeat%2C region (InterPro:IPR020472)%2C WD40 repeat-like-containing domain (InterPro:IPR011046)%2C WD40-repeat-containing domain (InterPro:IPR017986)%2C WD40/YVTN repeat-…	DWA3 encodes a DWD(DDB1 binding WD40) protein. Invitro analyses suggest its involvement in the negative regulation of ABA responses.	Transducin/WD40 repeat-like superfamily protein%3B CONTAINS InterPro DOMAIN/s: WD40 repeat 2 (InterPro:IPR019782)%2C WD40 repeat%2C conserved site (InterPro:IPR019775)%2C WD40 repeat (InterPro:IPR001680)%2C G-protein beta WD-40 repeat%2C region (InterPro:IPR020472)%2C WD40 repeat-like-containing domain (InterPro:IPR011046)%2C WD40-repeat-containing domain (InterPro:IPR017986)%2C WD40/YVTN repeat-…	scaffold_2	2599023	2606528	7506	-	scaffold_2	2606000	2608569	2570	*	0.136499387609172	-0.190458821653691	159.942918773857	0.205694444444444	3.35128315833576	0.00678181000201	2.468	0.0741666666666667	0.189722222222222	0.0318095238095238	0.253064516129032	0.296666666666667	0.2225	NO	NO	NO	0	0.09375	C	B	-3.36782776678105	-2.80434323666789	-0.407213296907303	0.474192074637254	-2.72419506011652	-2.02877225732584	-0.128953520550941	0.705556824208887	-0.56348453011316	-0.881405371544557
AL2G15150	AT1G61210	OG0015034	DWA3	protein_coding	Transducin/WD40 repeat-like superfamily protein	DWD hypersensitive to ABA 3	Transducin/WD40 repeat-like superfamily protein%3B CONTAINS InterPro DOMAIN/s: WD40 repeat 2 (InterPro:IPR019782)%2C WD40 repeat%2C conserved site (InterPro:IPR019775)%2C WD40 repeat (InterPro:IPR001680)%2C G-protein beta WD-40 repeat%2C region (InterPro:IPR020472)%2C WD40 repeat-like-containing domain (InterPro:IPR011046)%2C WD40-repeat-containing domain (InterPro:IPR017986)%2C WD40/YVTN repeat-…	DWA3 encodes a DWD(DDB1 binding WD40) protein. Invitro analyses suggest its involvement in the negative regulation of ABA responses.	Transducin/WD40 repeat-like superfamily protein%3B CONTAINS InterPro DOMAIN/s: WD40 repeat 2 (InterPro:IPR019782)%2C WD40 repeat%2C conserved site (InterPro:IPR019775)%2C WD40 repeat (InterPro:IPR001680)%2C G-protein beta WD-40 repeat%2C region (InterPro:IPR020472)%2C WD40 repeat-like-containing domain (InterPro:IPR011046)%2C WD40-repeat-containing domain (InterPro:IPR017986)%2C WD40/YVTN repeat-…	scaffold_2	2599023	2606528	7506	-	scaffold_2	2601666	2602149	484	*	0.0372820449947864	0.169917415023847	216.126634879882	0.424375	0.579193609728764	0.0134814066274	9.5757	0.00611111111111111	0.156388888888889	0.416063492063492	0.395806451612903	0.341111111111111	0.335	NO	NO	NO	0	0.09375	C	B	3.00291659336933	1.9326958053066	0.947669179935017	0.934045728011177	3.64654930003386	2.70826678464865	1.22592895629138	1.16541047758281	1.07022078806273	0.01362345192384
AL2G15150	AT1G61210	OG0015034	DWA3	protein_coding	Transducin/WD40 repeat-like superfamily protein	DWD hypersensitive to ABA 3	Transducin/WD40 repeat-like superfamily protein%3B CONTAINS InterPro DOMAIN/s: WD40 repeat 2 (InterPro:IPR019782)%2C WD40 repeat%2C conserved site (InterPro:IPR019775)%2C WD40 repeat (InterPro:IPR001680)%2C G-protein beta WD-40 repeat%2C region (InterPro:IPR020472)%2C WD40 repeat-like-containing domain (InterPro:IPR011046)%2C WD40-repeat-containing domain (InterPro:IPR017986)%2C WD40/YVTN repeat-…	DWA3 encodes a DWD(DDB1 binding WD40) protein. Invitro analyses suggest its involvement in the negative regulation of ABA responses.	Transducin/WD40 repeat-like superfamily protein%3B CONTAINS InterPro DOMAIN/s: WD40 repeat 2 (InterPro:IPR019782)%2C WD40 repeat%2C conserved site (InterPro:IPR019775)%2C WD40 repeat (InterPro:IPR001680)%2C G-protein beta WD-40 repeat%2C region (InterPro:IPR020472)%2C WD40 repeat-like-containing domain (InterPro:IPR011046)%2C WD40-repeat-containing domain (InterPro:IPR017986)%2C WD40/YVTN repeat-…	scaffold_2	2599023	2606528	7506	-	scaffold_2	2604311	2604861	551	*	0.176443601032683	-0.143490470533682	239.825028286392	0.329791666666667	4.53336092057839	0.00330949301573	1.5625	0.137222222222222	0.272222222222222	0.123936507936508	0.367741935483871	0.522222222222222	0.385	NO	NO	NO	0	0.09375	C	B	-1.02834005827223	0.151361803343259	0.0074855385460886	-1.22286249917253	-0.384707351607698	0.92693278268531	0.28574531490245	-0.991497749600897	-1.17970186161549	1.23034803771862
AL2G15150	AT1G61210	OG0015034	DWA3	protein_coding	Transducin/WD40 repeat-like superfamily protein	DWD hypersensitive to ABA 3	Transducin/WD40 repeat-like superfamily protein%3B CONTAINS InterPro DOMAIN/s: WD40 repeat 2 (InterPro:IPR019782)%2C WD40 repeat%2C conserved site (InterPro:IPR019775)%2C WD40 repeat (InterPro:IPR001680)%2C G-protein beta WD-40 repeat%2C region (InterPro:IPR020472)%2C WD40 repeat-like-containing domain (InterPro:IPR011046)%2C WD40-repeat-containing domain (InterPro:IPR017986)%2C WD40/YVTN repeat-…	DWA3 encodes a DWD(DDB1 binding WD40) protein. Invitro analyses suggest its involvement in the negative regulation of ABA responses.	Transducin/WD40 repeat-like superfamily protein%3B CONTAINS InterPro DOMAIN/s: WD40 repeat 2 (InterPro:IPR019782)%2C WD40 repeat%2C conserved site (InterPro:IPR019775)%2C WD40 repeat (InterPro:IPR001680)%2C G-protein beta WD-40 repeat%2C region (InterPro:IPR020472)%2C WD40 repeat-like-containing domain (InterPro:IPR011046)%2C WD40-repeat-containing domain (InterPro:IPR017986)%2C WD40/YVTN repeat-…	scaffold_2	2599023	2606528	7506	-	scaffold_2	2603663	2604302	640	*	0.193377370796274	-0.174150159830073	245.397479925537	0.341944444444444	4.91497727905569	0.00678181000201	0.7737	0.0472222222222222	0.292222222222222	0.0995555555555555	0.39741935483871	0.502222222222222	0.455	NO	NO	NO	0	0.09375	C	B	-1.02834005827223	2.30096546880591	0.0074855385460886	-0.32978368905658	-0.384707351607698	3.07653644814796	0.28574531490245	-0.0984189394849468	-3.32930552707814	0.337269227602669
AL2G15150	AT1G61210	OG0015034	DWA3	protein_coding	Transducin/WD40 repeat-like superfamily protein	DWD hypersensitive to ABA 3	Transducin/WD40 repeat-like superfamily protein%3B CONTAINS InterPro DOMAIN/s: WD40 repeat 2 (InterPro:IPR019782)%2C WD40 repeat%2C conserved site (InterPro:IPR019775)%2C WD40 repeat (InterPro:IPR001680)%2C G-protein beta WD-40 repeat%2C region (InterPro:IPR020472)%2C WD40 repeat-like-containing domain (InterPro:IPR011046)%2C WD40-repeat-containing domain (InterPro:IPR017986)%2C WD40/YVTN repeat-…	DWA3 encodes a DWD(DDB1 binding WD40) protein. Invitro analyses suggest its involvement in the negative regulation of ABA responses.	Transducin/WD40 repeat-like superfamily protein%3B CONTAINS InterPro DOMAIN/s: WD40 repeat 2 (InterPro:IPR019782)%2C WD40 repeat%2C conserved site (InterPro:IPR019775)%2C WD40 repeat (InterPro:IPR001680)%2C G-protein beta WD-40 repeat%2C region (InterPro:IPR020472)%2C WD40 repeat-like-containing domain (InterPro:IPR011046)%2C WD40-repeat-containing domain (InterPro:IPR017986)%2C WD40/YVTN repeat-…	scaffold_2	2599023	2606528	7506	-	scaffold_2	2604311	2604861	551	*	0.176443601032683	-0.143490470533682	239.825028286392	0.329791666666667	4.53336092057839	0.00330949301573	1.5625	0.137222222222222	0.272222222222222	0.123936507936508	0.367741935483871	0.522222222222222	0.385	NO	NO	NO	0	0.09375	C	B	-1.02834005827223	0.151361803343259	0.0074855385460886	-1.22286249917253	-0.384707351607698	0.92693278268531	0.28574531490245	-0.991497749600897	-1.17970186161549	1.23034803771862
AL2G15150	AT1G61210	OG0015034	DWA3	protein_coding	Transducin/WD40 repeat-like superfamily protein	DWD hypersensitive to ABA 3	Transducin/WD40 repeat-like superfamily protein%3B CONTAINS InterPro DOMAIN/s: WD40 repeat 2 (InterPro:IPR019782)%2C WD40 repeat%2C conserved site (InterPro:IPR019775)%2C WD40 repeat (InterPro:IPR001680)%2C G-protein beta WD-40 repeat%2C region (InterPro:IPR020472)%2C WD40 repeat-like-containing domain (InterPro:IPR011046)%2C WD40-repeat-containing domain (InterPro:IPR017986)%2C WD40/YVTN repeat-…	DWA3 encodes a DWD(DDB1 binding WD40) protein. Invitro analyses suggest its involvement in the negative regulation of ABA responses.	Transducin/WD40 repeat-like superfamily protein%3B CONTAINS InterPro DOMAIN/s: WD40 repeat 2 (InterPro:IPR019782)%2C WD40 repeat%2C conserved site (InterPro:IPR019775)%2C WD40 repeat (InterPro:IPR001680)%2C G-protein beta WD-40 repeat%2C region (InterPro:IPR020472)%2C WD40 repeat-like-containing domain (InterPro:IPR011046)%2C WD40-repeat-containing domain (InterPro:IPR017986)%2C WD40/YVTN repeat-…	scaffold_2	2599023	2606528	7506	-	scaffold_2	2602579	2603121	543	*	0.137554358867652	-0.136440666406549	178.544879694956	0.267847222222222	4.10808366697652	0.00678181000201	1.894	-0.0220833333333333	0.207916666666667	0.100634920634921	0.339758064516129	0.336666666666667	0.35875	NO	NO	NO	0	0.09375	C	B	-1.83232663767264	3.09479118790443	-0.0928206779715196	-1.30684468085775	-1.18869393100811	3.87036216724648	0.185439098384842	-1.07547993128612	-4.92711782557707	1.21402400288623
AL2G15150	AT1G61210	OG0015034	DWA3	protein_coding	Transducin/WD40 repeat-like superfamily protein	DWD hypersensitive to ABA 3	Transducin/WD40 repeat-like superfamily protein%3B CONTAINS InterPro DOMAIN/s: WD40 repeat 2 (InterPro:IPR019782)%2C WD40 repeat%2C conserved site (InterPro:IPR019775)%2C WD40 repeat (InterPro:IPR001680)%2C G-protein beta WD-40 repeat%2C region (InterPro:IPR020472)%2C WD40 repeat-like-containing domain (InterPro:IPR011046)%2C WD40-repeat-containing domain (InterPro:IPR017986)%2C WD40/YVTN repeat-…	DWA3 encodes a DWD(DDB1 binding WD40) protein. Invitro analyses suggest its involvement in the negative regulation of ABA responses.	Transducin/WD40 repeat-like superfamily protein%3B CONTAINS InterPro DOMAIN/s: WD40 repeat 2 (InterPro:IPR019782)%2C WD40 repeat%2C conserved site (InterPro:IPR019775)%2C WD40 repeat (InterPro:IPR001680)%2C G-protein beta WD-40 repeat%2C region (InterPro:IPR020472)%2C WD40 repeat-like-containing domain (InterPro:IPR011046)%2C WD40-repeat-containing domain (InterPro:IPR017986)%2C WD40/YVTN repeat-…	scaffold_2	2599023	2606528	7506	-	scaffold_2	2605659	2605997	339	*	0.194067331211983	-0.234645323299079	241.740088684305	0.277777777777778	5.1815588519664	0.00678181000201	1.7949	0.0527777777777778	0.267777777777778	0.0205079365079365	0.373225806451613	0.507777777777778	0.455	NO	NO	NO	0	0.09375	C	B	-3.36782776678105	0.736501379792161	-0.407213296907303	0.281647560529684	-2.72419506011652	1.51207235913421	-0.128953520550941	0.513012310101317	-4.10432914657321	-0.688860857436987
AL2G15150	AT1G61210	OG0015034	DWA3	protein_coding	Transducin/WD40 repeat-like superfamily protein	DWD hypersensitive to ABA 3	Transducin/WD40 repeat-like superfamily protein%3B CONTAINS InterPro DOMAIN/s: WD40 repeat 2 (InterPro:IPR019782)%2C WD40 repeat%2C conserved site (InterPro:IPR019775)%2C WD40 repeat (InterPro:IPR001680)%2C G-protein beta WD-40 repeat%2C region (InterPro:IPR020472)%2C WD40 repeat-like-containing domain (InterPro:IPR011046)%2C WD40-repeat-containing domain (InterPro:IPR017986)%2C WD40/YVTN repeat-…	DWA3 encodes a DWD(DDB1 binding WD40) protein. Invitro analyses suggest its involvement in the negative regulation of ABA responses.	Transducin/WD40 repeat-like superfamily protein%3B CONTAINS InterPro DOMAIN/s: WD40 repeat 2 (InterPro:IPR019782)%2C WD40 repeat%2C conserved site (InterPro:IPR019775)%2C WD40 repeat (InterPro:IPR001680)%2C G-protein beta WD-40 repeat%2C region (InterPro:IPR020472)%2C WD40 repeat-like-containing domain (InterPro:IPR011046)%2C WD40-repeat-containing domain (InterPro:IPR017986)%2C WD40/YVTN repeat-…	scaffold_2	2599023	2606528	7506	-	scaffold_2	2605659	2605997	339	*	0.194067331211983	-0.234645323299079	241.740088684305	0.277777777777778	5.1815588519664	0.00678181000201	1.7949	0.0527777777777778	0.267777777777778	0.0205079365079365	0.373225806451613	0.507777777777778	0.455	NO	NO	NO	0	0.09375	C	B	-3.36782776678105	0.736501379792161	-0.407213296907303	0.281647560529684	-2.72419506011652	1.51207235913421	-0.128953520550941	0.513012310101317	-4.10432914657321	-0.688860857436987
AL2G15150	AT1G61210	OG0015034	DWA3	protein_coding	Transducin/WD40 repeat-like superfamily protein	DWD hypersensitive to ABA 3	Transducin/WD40 repeat-like superfamily protein%3B CONTAINS InterPro DOMAIN/s: WD40 repeat 2 (InterPro:IPR019782)%2C WD40 repeat%2C conserved site (InterPro:IPR019775)%2C WD40 repeat (InterPro:IPR001680)%2C G-protein beta WD-40 repeat%2C region (InterPro:IPR020472)%2C WD40 repeat-like-containing domain (InterPro:IPR011046)%2C WD40-repeat-containing domain (InterPro:IPR017986)%2C WD40/YVTN repeat-…	DWA3 encodes a DWD(DDB1 binding WD40) protein. Invitro analyses suggest its involvement in the negative regulation of ABA responses.	Transducin/WD40 repeat-like superfamily protein%3B CONTAINS InterPro DOMAIN/s: WD40 repeat 2 (InterPro:IPR019782)%2C WD40 repeat%2C conserved site (InterPro:IPR019775)%2C WD40 repeat (InterPro:IPR001680)%2C G-protein beta WD-40 repeat%2C region (InterPro:IPR020472)%2C WD40 repeat-like-containing domain (InterPro:IPR011046)%2C WD40-repeat-containing domain (InterPro:IPR017986)%2C WD40/YVTN repeat-…	scaffold_2	2599023	2606528	7506	-	scaffold_2	2603124	2603637	514	*	0.218535511110768	-0.234696650034018	290.052690397476	0.326736111111111	6.11512999046328	0.00678181000201	0.0403	0.155138888888889	0.305138888888889	0.0385396825396825	0.423306451612903	0.678888888888889	0.52375	NO	NO	NO	0	0.09375	C	B	-1.83232663767264	2.44418144905565	-0.0928206779715196	-1.12351772327661	-1.18869393100811	3.2197524283977	0.185439098384842	-0.892152973704977	-4.27650808672829	1.03069704530509
AL2G28960	AT1G69770	OG0005962	CMT3	protein_coding	chromomethylase 3	chromomethylase 3	chromomethylase 3 (CMT3)%3B FUNCTIONS IN: D (cytosine-5-)-methyltransferase activity%3B INVOLVED IN: in 6 processes%3B LOCATED IN: chromatin%2C nucleus%3B EXPRESSED IN: 21 plant structures%3B EXPRESSED DURING: 13 growth stages%3B CONTAINS InterPro DOMAIN/s: D methylase%2C C-5 cytosine-specific (InterPro:IPR001525)%2C Chromo domain-like (InterPro:IPR016197)%2C Bromo adjacent homology (BAH) domain …	Encodes a chromomethylase involved in methylating cytosine residues at non-CG sites. Involved in preferentially methylating transposon-related sequences%2C reducing their mobility. CMT3 interacts with an Arabidopsis homologue of HP1 (heterochromatin protein 1)%2C which in turn interacts with methylated histones. Involved in gene silencing.	chromomethylase 3 (CMT3)%3B FUNCTIONS IN: D (cytosine-5-)-methyltransferase activity%3B INVOLVED IN: in 6 processes%3B LOCATED IN: chromatin%2C nucleus%3B EXPRESSED IN: 21 plant structures%3B EXPRESSED DURING: 13 growth stages%3B CONTAINS InterPro DOMAIN/s: D methylase%2C C-5 cytosine-specific (InterPro:IPR001525)%2C Chromo domain-like (InterPro:IPR016197)%2C Bromo adjacent homology (BAH) domain …	scaffold_2	13964694	13970116	5423	-	scaffold_2	13965991	13966648	658	*	0.175071224021811	-0.130727063327341	257.935851062529	0.410138888888889	2.46548204955336	0.0134814066274	7.0895	0.250416666666667	0.334861111111111	0.168444444444444	0.37508064516129	0.536666666666667	0.28625	NO	NO	NO	0.888888888888889	0.34375	C	A	-1.44278947807582	1.30800133907444	-3.63497751798139	0.858256929905012	-0.799156771411288	2.08357231841649	-3.35671774162503	1.08962167947665	-2.75079081715026	-4.4932344478864
AL2G28960	AT1G69770	OG0005962	CMT3	protein_coding	chromomethylase 3	chromomethylase 3	chromomethylase 3 (CMT3)%3B FUNCTIONS IN: D (cytosine-5-)-methyltransferase activity%3B INVOLVED IN: in 6 processes%3B LOCATED IN: chromatin%2C nucleus%3B EXPRESSED IN: 21 plant structures%3B EXPRESSED DURING: 13 growth stages%3B CONTAINS InterPro DOMAIN/s: D methylase%2C C-5 cytosine-specific (InterPro:IPR001525)%2C Chromo domain-like (InterPro:IPR016197)%2C Bromo adjacent homology (BAH) domain …	Encodes a chromomethylase involved in methylating cytosine residues at non-CG sites. Involved in preferentially methylating transposon-related sequences%2C reducing their mobility. CMT3 interacts with an Arabidopsis homologue of HP1 (heterochromatin protein 1)%2C which in turn interacts with methylated histones. Involved in gene silencing.	chromomethylase 3 (CMT3)%3B FUNCTIONS IN: D (cytosine-5-)-methyltransferase activity%3B INVOLVED IN: in 6 processes%3B LOCATED IN: chromatin%2C nucleus%3B EXPRESSED IN: 21 plant structures%3B EXPRESSED DURING: 13 growth stages%3B CONTAINS InterPro DOMAIN/s: D methylase%2C C-5 cytosine-specific (InterPro:IPR001525)%2C Chromo domain-like (InterPro:IPR016197)%2C Bromo adjacent homology (BAH) domain …	scaffold_2	13964694	13970116	5423	-	scaffold_2	13965991	13966648	658	*	0.175071224021811	-0.130727063327341	257.935851062529	0.410138888888889	2.46548204955336	0.0134814066274	7.0895	0.250416666666667	0.334861111111111	0.168444444444444	0.37508064516129	0.536666666666667	0.28625	NO	NO	NO	0.888888888888889	0.34375	B	A	-1.44278947807582	1.30800133907444	-3.63497751798139	0.858256929905012	-0.799156771411288	2.08357231841649	-3.35671774162503	1.08962167947665	-2.75079081715026	-4.4932344478864
AL2G28960	AT1G69770	OG0005962	CMT3	protein_coding	chromomethylase 3	chromomethylase 3	chromomethylase 3 (CMT3)%3B FUNCTIONS IN: D (cytosine-5-)-methyltransferase activity%3B INVOLVED IN: in 6 processes%3B LOCATED IN: chromatin%2C nucleus%3B EXPRESSED IN: 21 plant structures%3B EXPRESSED DURING: 13 growth stages%3B CONTAINS InterPro DOMAIN/s: D methylase%2C C-5 cytosine-specific (InterPro:IPR001525)%2C Chromo domain-like (InterPro:IPR016197)%2C Bromo adjacent homology (BAH) domain …	Encodes a chromomethylase involved in methylating cytosine residues at non-CG sites. Involved in preferentially methylating transposon-related sequences%2C reducing their mobility. CMT3 interacts with an Arabidopsis homologue of HP1 (heterochromatin protein 1)%2C which in turn interacts with methylated histones. Involved in gene silencing.	chromomethylase 3 (CMT3)%3B FUNCTIONS IN: D (cytosine-5-)-methyltransferase activity%3B INVOLVED IN: in 6 processes%3B LOCATED IN: chromatin%2C nucleus%3B EXPRESSED IN: 21 plant structures%3B EXPRESSED DURING: 13 growth stages%3B CONTAINS InterPro DOMAIN/s: D methylase%2C C-5 cytosine-specific (InterPro:IPR001525)%2C Chromo domain-like (InterPro:IPR016197)%2C Bromo adjacent homology (BAH) domain …	scaffold_2	13964694	13970116	5423	-	scaffold_2	13965991	13966648	658	*	0.175071224021811	-0.130727063327341	257.935851062529	0.410138888888889	2.46548204955336	0.0134814066274	7.0895	0.250416666666667	0.334861111111111	0.168444444444444	0.37508064516129	0.536666666666667	0.28625	NO	MODERATE	NO	0.888888888888889	0.34375	C	A	-1.44278947807582	1.30800133907444	-3.63497751798139	0.858256929905012	-0.799156771411288	2.08357231841649	-3.35671774162503	1.08962167947665	-2.75079081715026	-4.4932344478864
AL2G31380	AT1G71810	OG0006098	.	protein_coding	Protein kinase superfamily protein	.	Protein kinase superfamily protein%3B FUNCTIONS IN: protein kinase activity%2C ATP binding%3B INVOLVED IN: protein amino acid phosphorylation%3B LOCATED IN: chloroplast%2C plastoglobule%3B EXPRESSED IN: 22 plant structures%3B EXPRESSED DURING: 14 growth stages%3B CONTAINS InterPro DOMAIN/s: ABC-1 (InterPro:IPR004147)%2C Protein kinase%2C catalytic domain (InterPro:IPR000719)%2C Protein kinase-lik…	.	Protein kinase superfamily protein%3B FUNCTIONS IN: protein kinase activity%2C ATP binding%3B INVOLVED IN: protein amino acid phosphorylation%3B LOCATED IN: chloroplast%2C plastoglobule%3B EXPRESSED IN: 22 plant structures%3B EXPRESSED DURING: 14 growth stages%3B CONTAINS InterPro DOMAIN/s: ABC-1 (InterPro:IPR004147)%2C Protein kinase%2C catalytic domain (InterPro:IPR000719)%2C Protein kinase-lik…	scaffold_2	15038687	15044366	5680	-	scaffold_2	15042561	15043076	516	*	0.17483242617132	-0.121438271164691	290.161801742977	0.380694444444444	3.19213139243252	0.0138753078716	20.5524	0.235833333333333	0.298333333333333	0.161079365079365	0.391451612903226	0.743333333333333	0.5075	NO	NO	NO	0.0555555555555556	0.03125	C	A	-2.19242203520691	1.58488556755725	-6.42109496483613	-1.76874668012643	-1.54878932854238	2.3604565468993	-6.14283518847977	-1.5373819305548	-3.77730760276416	-4.6523482847097
AL2G31380	AT1G71810	OG0006098	.	protein_coding	Protein kinase superfamily protein	.	Protein kinase superfamily protein%3B FUNCTIONS IN: protein kinase activity%2C ATP binding%3B INVOLVED IN: protein amino acid phosphorylation%3B LOCATED IN: chloroplast%2C plastoglobule%3B EXPRESSED IN: 22 plant structures%3B EXPRESSED DURING: 14 growth stages%3B CONTAINS InterPro DOMAIN/s: ABC-1 (InterPro:IPR004147)%2C Protein kinase%2C catalytic domain (InterPro:IPR000719)%2C Protein kinase-lik…	.	Protein kinase superfamily protein%3B FUNCTIONS IN: protein kinase activity%2C ATP binding%3B INVOLVED IN: protein amino acid phosphorylation%3B LOCATED IN: chloroplast%2C plastoglobule%3B EXPRESSED IN: 22 plant structures%3B EXPRESSED DURING: 14 growth stages%3B CONTAINS InterPro DOMAIN/s: ABC-1 (InterPro:IPR004147)%2C Protein kinase%2C catalytic domain (InterPro:IPR000719)%2C Protein kinase-lik…	scaffold_2	15038687	15044366	5680	-	scaffold_2	15042561	15043076	516	*	0.17483242617132	-0.121438271164691	290.161801742977	0.380694444444444	3.19213139243252	0.0138753078716	20.5524	0.235833333333333	0.298333333333333	0.161079365079365	0.391451612903226	0.743333333333333	0.5075	NO	MODERATE	NO	0.0555555555555556	0.03125	C	A	-2.19242203520691	1.58488556755725	-6.42109496483613	-1.76874668012643	-1.54878932854238	2.3604565468993	-6.14283518847977	-1.5373819305548	-3.77730760276416	-4.6523482847097
AL2G31380	AT1G71810	OG0006098	.	protein_coding	Protein kinase superfamily protein	.	Protein kinase superfamily protein%3B FUNCTIONS IN: protein kinase activity%2C ATP binding%3B INVOLVED IN: protein amino acid phosphorylation%3B LOCATED IN: chloroplast%2C plastoglobule%3B EXPRESSED IN: 22 plant structures%3B EXPRESSED DURING: 14 growth stages%3B CONTAINS InterPro DOMAIN/s: ABC-1 (InterPro:IPR004147)%2C Protein kinase%2C catalytic domain (InterPro:IPR000719)%2C Protein kinase-lik…	.	Protein kinase superfamily protein%3B FUNCTIONS IN: protein kinase activity%2C ATP binding%3B INVOLVED IN: protein amino acid phosphorylation%3B LOCATED IN: chloroplast%2C plastoglobule%3B EXPRESSED IN: 22 plant structures%3B EXPRESSED DURING: 14 growth stages%3B CONTAINS InterPro DOMAIN/s: ABC-1 (InterPro:IPR004147)%2C Protein kinase%2C catalytic domain (InterPro:IPR000719)%2C Protein kinase-lik…	scaffold_2	15038687	15044366	5680	-	scaffold_2	15041538	15041725	188	*	0.157352076077269	-0.0985274004421365	254.175048699985	0.37	3.15706159436668	0.0261323593166	19.1184	0.157083333333333	0.282083333333333	0.178666666666667	0.386532258064516	0.553333333333333	0.39625	NO	MODERATE	NO	0.0555555555555556	0.03125	C	A	-1.50167300220091	1.61762064875719	-6.90765497033198	-1.38365765191129	-0.858040295536378	2.39319162809924	-6.62939519397562	-1.15229290233966	-3.1192936509581	-5.52399731842069
AL2G31380	AT1G71810	OG0006098	.	protein_coding	Protein kinase superfamily protein	.	Protein kinase superfamily protein%3B FUNCTIONS IN: protein kinase activity%2C ATP binding%3B INVOLVED IN: protein amino acid phosphorylation%3B LOCATED IN: chloroplast%2C plastoglobule%3B EXPRESSED IN: 22 plant structures%3B EXPRESSED DURING: 14 growth stages%3B CONTAINS InterPro DOMAIN/s: ABC-1 (InterPro:IPR004147)%2C Protein kinase%2C catalytic domain (InterPro:IPR000719)%2C Protein kinase-lik…	.	Protein kinase superfamily protein%3B FUNCTIONS IN: protein kinase activity%2C ATP binding%3B INVOLVED IN: protein amino acid phosphorylation%3B LOCATED IN: chloroplast%2C plastoglobule%3B EXPRESSED IN: 22 plant structures%3B EXPRESSED DURING: 14 growth stages%3B CONTAINS InterPro DOMAIN/s: ABC-1 (InterPro:IPR004147)%2C Protein kinase%2C catalytic domain (InterPro:IPR000719)%2C Protein kinase-lik…	scaffold_2	15038687	15044366	5680	-	scaffold_2	15041737	15042108	372	*	0.17370954757706	-0.146763485839269	270.766501221406	0.347430555555556	3.93697404418872	0.0138753078716	17.4033	0.236944444444444	0.291666666666667	0.129714285714286	0.364354838709677	0.674444444444445	0.4375	NO	NO	NO	0.0555555555555556	0.03125	C	A	-2.59328294944318	2.11001082847294	-6.90166653949512	-1.62024160275624	-1.94965024277865	2.88558180781499	-6.62340676313876	-1.38887685318461	-4.70329377791612	-5.28142493673888
AL2G31380	AT1G71810	OG0006098	.	protein_coding	Protein kinase superfamily protein	.	Protein kinase superfamily protein%3B FUNCTIONS IN: protein kinase activity%2C ATP binding%3B INVOLVED IN: protein amino acid phosphorylation%3B LOCATED IN: chloroplast%2C plastoglobule%3B EXPRESSED IN: 22 plant structures%3B EXPRESSED DURING: 14 growth stages%3B CONTAINS InterPro DOMAIN/s: ABC-1 (InterPro:IPR004147)%2C Protein kinase%2C catalytic domain (InterPro:IPR000719)%2C Protein kinase-lik…	.	Protein kinase superfamily protein%3B FUNCTIONS IN: protein kinase activity%2C ATP binding%3B INVOLVED IN: protein amino acid phosphorylation%3B LOCATED IN: chloroplast%2C plastoglobule%3B EXPRESSED IN: 22 plant structures%3B EXPRESSED DURING: 14 growth stages%3B CONTAINS InterPro DOMAIN/s: ABC-1 (InterPro:IPR004147)%2C Protein kinase%2C catalytic domain (InterPro:IPR000719)%2C Protein kinase-lik…	scaffold_2	15038687	15044366	5680	-	scaffold_2	15041737	15042108	372	*	0.17370954757706	-0.146763485839269	270.766501221406	0.347430555555556	3.93697404418872	0.0138753078716	17.4033	0.236944444444444	0.291666666666667	0.129714285714286	0.364354838709677	0.674444444444445	0.4375	NO	NO	NO	0.0555555555555556	0.03125	C	A	-2.59328294944318	2.11001082847294	-6.90166653949512	-1.62024160275624	-1.94965024277865	2.88558180781499	-6.62340676313876	-1.38887685318461	-4.70329377791612	-5.28142493673888
AL2G31380	AT1G71810	OG0006098	.	protein_coding	Protein kinase superfamily protein	.	Protein kinase superfamily protein%3B FUNCTIONS IN: protein kinase activity%2C ATP binding%3B INVOLVED IN: protein amino acid phosphorylation%3B LOCATED IN: chloroplast%2C plastoglobule%3B EXPRESSED IN: 22 plant structures%3B EXPRESSED DURING: 14 growth stages%3B CONTAINS InterPro DOMAIN/s: ABC-1 (InterPro:IPR004147)%2C Protein kinase%2C catalytic domain (InterPro:IPR000719)%2C Protein kinase-lik…	.	Protein kinase superfamily protein%3B FUNCTIONS IN: protein kinase activity%2C ATP binding%3B INVOLVED IN: protein amino acid phosphorylation%3B LOCATED IN: chloroplast%2C plastoglobule%3B EXPRESSED IN: 22 plant structures%3B EXPRESSED DURING: 14 growth stages%3B CONTAINS InterPro DOMAIN/s: ABC-1 (InterPro:IPR004147)%2C Protein kinase%2C catalytic domain (InterPro:IPR000719)%2C Protein kinase-lik…	scaffold_2	15038687	15044366	5680	-	scaffold_2	15042561	15043076	516	*	0.17483242617132	-0.121438271164691	290.161801742977	0.380694444444444	3.19213139243252	0.0138753078716	20.5524	0.235833333333333	0.298333333333333	0.161079365079365	0.391451612903226	0.743333333333333	0.5075	NO	NO	NO	0.0555555555555556	0.03125	C	A	-2.19242203520691	1.58488556755725	-6.42109496483613	-1.76874668012643	-1.54878932854238	2.3604565468993	-6.14283518847977	-1.5373819305548	-3.77730760276416	-4.6523482847097
AL2G31380	AT1G71810	OG0006098	.	protein_coding	Protein kinase superfamily protein	.	Protein kinase superfamily protein%3B FUNCTIONS IN: protein kinase activity%2C ATP binding%3B INVOLVED IN: protein amino acid phosphorylation%3B LOCATED IN: chloroplast%2C plastoglobule%3B EXPRESSED IN: 22 plant structures%3B EXPRESSED DURING: 14 growth stages%3B CONTAINS InterPro DOMAIN/s: ABC-1 (InterPro:IPR004147)%2C Protein kinase%2C catalytic domain (InterPro:IPR000719)%2C Protein kinase-lik…	.	Protein kinase superfamily protein%3B FUNCTIONS IN: protein kinase activity%2C ATP binding%3B INVOLVED IN: protein amino acid phosphorylation%3B LOCATED IN: chloroplast%2C plastoglobule%3B EXPRESSED IN: 22 plant structures%3B EXPRESSED DURING: 14 growth stages%3B CONTAINS InterPro DOMAIN/s: ABC-1 (InterPro:IPR004147)%2C Protein kinase%2C catalytic domain (InterPro:IPR000719)%2C Protein kinase-lik…	scaffold_2	15038687	15044366	5680	-	scaffold_2	15041737	15042108	372	*	0.17370954757706	-0.146763485839269	270.766501221406	0.347430555555556	3.93697404418872	0.0138753078716	17.4033	0.236944444444444	0.291666666666667	0.129714285714286	0.364354838709677	0.674444444444445	0.4375	NO	MODERATE	NO	0.0555555555555556	0.03125	C	A	-2.59328294944318	2.11001082847294	-6.90166653949512	-1.62024160275624	-1.94965024277865	2.88558180781499	-6.62340676313876	-1.38887685318461	-4.70329377791612	-5.28142493673888
AL2G34680	AT1G74800	OG0004328	.	protein_coding	Galactosyltransferase family protein	.	Galactosyltransferase family protein%3B FUNCTIONS IN: transferase activity%2C transferring hexosyl groups%2C transferase activity%2C transferring glycosyl groups%3B INVOLVED IN: protein amino acid glycosylation%3B LOCATED IN: membrane%3B EXPRESSED IN: 23 plant structures%3B EXPRESSED DURING: 15 growth stages%3B CONTAINS InterPro DOMAIN/s: Galectin%2C carbohydrate recognition domain (InterPro:IPR0…	.	Galactosyltransferase family protein%3B FUNCTIONS IN: transferase activity%2C transferring hexosyl groups%2C transferase activity%2C transferring glycosyl groups%3B INVOLVED IN: protein amino acid glycosylation%3B LOCATED IN: membrane%3B EXPRESSED IN: 23 plant structures%3B EXPRESSED DURING: 15 growth stages%3B CONTAINS InterPro DOMAIN/s: Galectin%2C carbohydrate recognition domain (InterPro:IPR0…	scaffold_2	16440155	16443384	3230	-	scaffold_2	16440946	16441275	330	*	0.179711853708419	0.0298812977113742	227.55627153635	0.392291666666667	2.70352445141948	0.0223482988692	21.7042	0.151944444444444	0.336111111111111	0.347492063492063	0.153709677419355	0.334444444444444	0.1825	NO	NO	NO	NO	NO	C	B	1.6972876834416	-1.78955571946979	-0.333106465301015	-0.173085228107335	2.34092039010613	-1.01398474012774	-0.0548466889446533	0.0582795214642982	3.48684340291139	-0.16002123719368
AL2G40210	AT1G79570	OG0004639	.	protein_coding	kinase superfamily with octicosapeptide/Phox/Bem1p domain-containing protein	.	Protein kinase superfamily protein with octicosapeptide/Phox/Bem1p domain%3B FUNCTIONS IN: protein serine/threonine/tyrosine kinase activity%2C protein kinase activity%3B INVOLVED IN: protein amino acid phosphorylation%3B LOCATED IN: cytosol%3B EXPRESSED IN: male gametophyte%2C pollen tube%3B EXPRESSED DURING: L mature pollen stage%2C M germinated pollen stage%3B CONTAINS InterPro DOMAIN/s: Octic…	.	Protein kinase superfamily protein with octicosapeptide/Phox/Bem1p domain%3B FUNCTIONS IN: protein serine/threonine/tyrosine kinase activity%2C protein kinase activity%3B INVOLVED IN: protein amino acid phosphorylation%3B LOCATED IN: cytosol%3B EXPRESSED IN: male gametophyte%2C pollen tube%3B EXPRESSED DURING: L mature pollen stage%2C M germinated pollen stage%3B CONTAINS InterPro DOMAIN/s: Octic…	scaffold_2	18727599	18733173	5575	-	scaffold_2	18732579	18732878	300	*	0.179725409772088	-0.191835172190529	251.546472704845	0.329791666666667	3.81899451420294	0.00456297017658	18.2641	0.10375	0.290972222222222	0.0793015873015873	0.330887096774194	0.53	0.42625	NO	MODERATE	NO	NO	NO	C	A	-2.50495766325552	-0.602909025971994	-4.44491278866834	0.0297010154740414	-1.86132495659099	0.172661953370057	-4.16665301231198	0.261065765045675	-1.90204863728353	-4.47461380414238
AL2G40210	AT1G79570	OG0004639	.	protein_coding	kinase superfamily with octicosapeptide/Phox/Bem1p domain-containing protein	.	Protein kinase superfamily protein with octicosapeptide/Phox/Bem1p domain%3B FUNCTIONS IN: protein serine/threonine/tyrosine kinase activity%2C protein kinase activity%3B INVOLVED IN: protein amino acid phosphorylation%3B LOCATED IN: cytosol%3B EXPRESSED IN: male gametophyte%2C pollen tube%3B EXPRESSED DURING: L mature pollen stage%2C M germinated pollen stage%3B CONTAINS InterPro DOMAIN/s: Octic…	.	Protein kinase superfamily protein with octicosapeptide/Phox/Bem1p domain%3B FUNCTIONS IN: protein serine/threonine/tyrosine kinase activity%2C protein kinase activity%3B INVOLVED IN: protein amino acid phosphorylation%3B LOCATED IN: cytosol%3B EXPRESSED IN: male gametophyte%2C pollen tube%3B EXPRESSED DURING: L mature pollen stage%2C M germinated pollen stage%3B CONTAINS InterPro DOMAIN/s: Octic…	scaffold_2	18727599	18733173	5575	-	scaffold_2	18732579	18732878	300	*	0.179725409772088	-0.191835172190529	251.546472704845	0.329791666666667	3.81899451420294	0.00456297017658	18.2641	0.10375	0.290972222222222	0.0793015873015873	0.330887096774194	0.53	0.42625	NO	NO	NO	NO	NO	C	B	-2.50495766325552	-0.602909025971994	-4.44491278866834	0.0297010154740414	-1.86132495659099	0.172661953370057	-4.16665301231198	0.261065765045675	-1.90204863728353	-4.47461380414238
AL2G40210	AT1G79570	OG0004639	.	protein_coding	kinase superfamily with octicosapeptide/Phox/Bem1p domain-containing protein	.	Protein kinase superfamily protein with octicosapeptide/Phox/Bem1p domain%3B FUNCTIONS IN: protein serine/threonine/tyrosine kinase activity%2C protein kinase activity%3B INVOLVED IN: protein amino acid phosphorylation%3B LOCATED IN: cytosol%3B EXPRESSED IN: male gametophyte%2C pollen tube%3B EXPRESSED DURING: L mature pollen stage%2C M germinated pollen stage%3B CONTAINS InterPro DOMAIN/s: Octic…	.	Protein kinase superfamily protein with octicosapeptide/Phox/Bem1p domain%3B FUNCTIONS IN: protein serine/threonine/tyrosine kinase activity%2C protein kinase activity%3B INVOLVED IN: protein amino acid phosphorylation%3B LOCATED IN: cytosol%3B EXPRESSED IN: male gametophyte%2C pollen tube%3B EXPRESSED DURING: L mature pollen stage%2C M germinated pollen stage%3B CONTAINS InterPro DOMAIN/s: Octic…	scaffold_2	18727599	18733173	5575	-	scaffold_2	18732579	18732878	300	*	0.179725409772088	-0.191835172190529	251.546472704845	0.329791666666667	3.81899451420294	0.00456297017658	18.2641	0.10375	0.290972222222222	0.0793015873015873	0.330887096774194	0.53	0.42625	NO	NO	NO	NO	NO	C	B	-2.50495766325552	-0.602909025971994	-4.44491278866834	0.0297010154740414	-1.86132495659099	0.172661953370057	-4.16665301231198	0.261065765045675	-1.90204863728353	-4.47461380414238
AL2G40210	AT1G79570	OG0004639	.	protein_coding	kinase superfamily with octicosapeptide/Phox/Bem1p domain-containing protein	.	Protein kinase superfamily protein with octicosapeptide/Phox/Bem1p domain%3B FUNCTIONS IN: protein serine/threonine/tyrosine kinase activity%2C protein kinase activity%3B INVOLVED IN: protein amino acid phosphorylation%3B LOCATED IN: cytosol%3B EXPRESSED IN: male gametophyte%2C pollen tube%3B EXPRESSED DURING: L mature pollen stage%2C M germinated pollen stage%3B CONTAINS InterPro DOMAIN/s: Octic…	.	Protein kinase superfamily protein with octicosapeptide/Phox/Bem1p domain%3B FUNCTIONS IN: protein serine/threonine/tyrosine kinase activity%2C protein kinase activity%3B INVOLVED IN: protein amino acid phosphorylation%3B LOCATED IN: cytosol%3B EXPRESSED IN: male gametophyte%2C pollen tube%3B EXPRESSED DURING: L mature pollen stage%2C M germinated pollen stage%3B CONTAINS InterPro DOMAIN/s: Octic…	scaffold_2	18727599	18733173	5575	-	scaffold_2	18732579	18732878	300	*	0.179725409772088	-0.191835172190529	251.546472704845	0.329791666666667	3.81899451420294	0.00456297017658	18.2641	0.10375	0.290972222222222	0.0793015873015873	0.330887096774194	0.53	0.42625	NO	NO	NO	NO	NO	C	A	-2.50495766325552	-0.602909025971994	-4.44491278866834	0.0297010154740414	-1.86132495659099	0.172661953370057	-4.16665301231198	0.261065765045675	-1.90204863728353	-4.47461380414238
AL2G40210	AT1G79570	OG0004639	.	protein_coding	kinase superfamily with octicosapeptide/Phox/Bem1p domain-containing protein	.	Protein kinase superfamily protein with octicosapeptide/Phox/Bem1p domain%3B FUNCTIONS IN: protein serine/threonine/tyrosine kinase activity%2C protein kinase activity%3B INVOLVED IN: protein amino acid phosphorylation%3B LOCATED IN: cytosol%3B EXPRESSED IN: male gametophyte%2C pollen tube%3B EXPRESSED DURING: L mature pollen stage%2C M germinated pollen stage%3B CONTAINS InterPro DOMAIN/s: Octic…	.	Protein kinase superfamily protein with octicosapeptide/Phox/Bem1p domain%3B FUNCTIONS IN: protein serine/threonine/tyrosine kinase activity%2C protein kinase activity%3B INVOLVED IN: protein amino acid phosphorylation%3B LOCATED IN: cytosol%3B EXPRESSED IN: male gametophyte%2C pollen tube%3B EXPRESSED DURING: L mature pollen stage%2C M germinated pollen stage%3B CONTAINS InterPro DOMAIN/s: Octic…	scaffold_2	18727599	18733173	5575	-	scaffold_2	18732579	18732878	300	*	0.179725409772088	-0.191835172190529	251.546472704845	0.329791666666667	3.81899451420294	0.00456297017658	18.2641	0.10375	0.290972222222222	0.0793015873015873	0.330887096774194	0.53	0.42625	NO	NO	NO	NO	NO	C	A	-2.50495766325552	-0.602909025971994	-4.44491278866834	0.0297010154740414	-1.86132495659099	0.172661953370057	-4.16665301231198	0.261065765045675	-1.90204863728353	-4.47461380414238
AL2G40600	AT1G80790	OG0004663	FDM5	protein_coding	XH/XS domain-containing protein	factor of D methylation 5	XH/XS domain-containing protein%3B CONTAINS InterPro DOMAIN/s: Domain of unknown function XS (InterPro:IPR005380)%2C Domain of unknown function XH (InterPro:IPR005379)%2C Domain of unknown function%2C putative Zinc finger%2C XS/XH (InterPro:IPR005381)%3B BEST Arabidopsis thaliana protein match is: XH/XS domain-containing protein (TAIR:AT1G15910.1)%3B Has 81745 Blast hits to 47168 proteins in 2099…	Belongs to a subgroup of SGS3-like proteins that act redundantly in R-directed D methylation: AT1G15910 (FDM1)%2C AT4G00380 (FDM2)%2C AT3G12550 (FDM3)%2C AT1G13790 (FDM4)%2C AT1G80790 (FDM5).	XH/XS domain-containing protein%3B CONTAINS InterPro DOMAIN/s: Domain of unknown function XS (InterPro:IPR005380)%2C Domain of unknown function XH (InterPro:IPR005379)%2C Domain of unknown function%2C putative Zinc finger%2C XS/XH (InterPro:IPR005381)%3B BEST Arabidopsis thaliana protein match is: XH/XS domain-containing protein (TAIR:AT1G15910.1)%3B Has 81745 Blast hits to 47168 proteins in 2099…	scaffold_2	18878032	18883455	5424	-	scaffold_2	18878492	18879149	658	*	0.144621221237664	-0.0114553333773616	254.767999768983	0.446180555555556	1.60956303968259	0.0496951484715	11.9171	-0.130555555555556	0.332222222222222	0.29968253968254	0.319838709677419	0.324444444444444	0.455	NO	MODERATE	NO	0.944444444444444	0.8125	C	B	1.28850014095772	1.35846792259102	0.515005051971001	-3.34802136498744	1.93213284762225	2.13403890193307	0.793264828327363	-3.11665661541581	-0.0699677816333	3.86302641695844
AL2G40600	AT1G80790	OG0004663	FDM5	protein_coding	XH/XS domain-containing protein	factor of D methylation 5	XH/XS domain-containing protein%3B CONTAINS InterPro DOMAIN/s: Domain of unknown function XS (InterPro:IPR005380)%2C Domain of unknown function XH (InterPro:IPR005379)%2C Domain of unknown function%2C putative Zinc finger%2C XS/XH (InterPro:IPR005381)%3B BEST Arabidopsis thaliana protein match is: XH/XS domain-containing protein (TAIR:AT1G15910.1)%3B Has 81745 Blast hits to 47168 proteins in 2099…	Belongs to a subgroup of SGS3-like proteins that act redundantly in R-directed D methylation: AT1G15910 (FDM1)%2C AT4G00380 (FDM2)%2C AT3G12550 (FDM3)%2C AT1G13790 (FDM4)%2C AT1G80790 (FDM5).	XH/XS domain-containing protein%3B CONTAINS InterPro DOMAIN/s: Domain of unknown function XS (InterPro:IPR005380)%2C Domain of unknown function XH (InterPro:IPR005379)%2C Domain of unknown function%2C putative Zinc finger%2C XS/XH (InterPro:IPR005381)%3B BEST Arabidopsis thaliana protein match is: XH/XS domain-containing protein (TAIR:AT1G15910.1)%3B Has 81745 Blast hits to 47168 proteins in 2099…	scaffold_2	18878032	18883455	5424	-	scaffold_2	18878492	18879149	658	*	0.144621221237664	-0.0114553333773616	254.767999768983	0.446180555555556	1.60956303968259	0.0496951484715	11.9171	-0.130555555555556	0.332222222222222	0.29968253968254	0.319838709677419	0.324444444444444	0.455	NO	NO	NO	0.944444444444444	0.8125	B	B	1.28850014095772	1.35846792259102	0.515005051971001	-3.34802136498744	1.93213284762225	2.13403890193307	0.793264828327363	-3.11665661541581	-0.0699677816333	3.86302641695844
AL2G40600	AT1G80790	OG0004663	FDM5	protein_coding	XH/XS domain-containing protein	factor of D methylation 5	XH/XS domain-containing protein%3B CONTAINS InterPro DOMAIN/s: Domain of unknown function XS (InterPro:IPR005380)%2C Domain of unknown function XH (InterPro:IPR005379)%2C Domain of unknown function%2C putative Zinc finger%2C XS/XH (InterPro:IPR005381)%3B BEST Arabidopsis thaliana protein match is: XH/XS domain-containing protein (TAIR:AT1G15910.1)%3B Has 81745 Blast hits to 47168 proteins in 2099…	Belongs to a subgroup of SGS3-like proteins that act redundantly in R-directed D methylation: AT1G15910 (FDM1)%2C AT4G00380 (FDM2)%2C AT3G12550 (FDM3)%2C AT1G13790 (FDM4)%2C AT1G80790 (FDM5).	XH/XS domain-containing protein%3B CONTAINS InterPro DOMAIN/s: Domain of unknown function XS (InterPro:IPR005380)%2C Domain of unknown function XH (InterPro:IPR005379)%2C Domain of unknown function%2C putative Zinc finger%2C XS/XH (InterPro:IPR005381)%3B BEST Arabidopsis thaliana protein match is: XH/XS domain-containing protein (TAIR:AT1G15910.1)%3B Has 81745 Blast hits to 47168 proteins in 2099…	scaffold_2	18878032	18883455	5424	-	scaffold_2	18878492	18879149	658	*	0.144621221237664	-0.0114553333773616	254.767999768983	0.446180555555556	1.60956303968259	0.0496951484715	11.9171	-0.130555555555556	0.332222222222222	0.29968253968254	0.319838709677419	0.324444444444444	0.455	NO	NO	NO	0.944444444444444	0.8125	C	B	1.28850014095772	1.35846792259102	0.515005051971001	-3.34802136498744	1.93213284762225	2.13403890193307	0.793264828327363	-3.11665661541581	-0.0699677816333	3.86302641695844
AL3G11650	AT3G02350	OG0005262	GAUT9	protein_coding	galacturonosyltransferase 9	galacturonosyltransferase 9	galacturonosyltransferase 9 (GAUT9)%3B CONTAINS InterPro DOMAIN/s: Glycosyl transferase%2C family 8 (InterPro:IPR002495)%3B BEST Arabidopsis thaliana protein match is: Nucleotide-diphospho-sugar transferases superfamily protein (TAIR:AT3G25140.1)%3B Has 1426 Blast hits to 1422 proteins in 244 species: Archae - 0%3B Bacteria - 444%3B Metazoa - 141%3B Fungi - 7%3B Plants - 818%3B Viruses - 0%3B Oth…	Encodes a protein with putative galacturonosyltransferase activity.	galacturonosyltransferase 9 (GAUT9)%3B CONTAINS InterPro DOMAIN/s: Glycosyl transferase%2C family 8 (InterPro:IPR002495)%3B BEST Arabidopsis thaliana protein match is: Nucleotide-diphospho-sugar transferases superfamily protein (TAIR:AT3G25140.1)%3B Has 1426 Blast hits to 1422 proteins in 244 species: Archae - 0%3B Bacteria - 444%3B Metazoa - 141%3B Fungi - 7%3B Plants - 818%3B Viruses - 0%3B Oth…	scaffold_3	575035	577390	2356	+	scaffold_3	576577	576785	209	*	0.181146928461877	-0.199125471263772	271.42292660467	0.324305555555556	3.91850321200614	0.0134814066274	30.3998	0.228194444444444	0.282916666666667	0.0673015873015873	0.357177419354839	0.564444444444444	0.33625	NO	NO	NO	NO	NO	C	A	-1.32049292796984	0.278210242993022	-1.99115325325999	0.855184411062869	-0.676860221305308	1.05378122233507	-1.71289347690363	1.0865491606345	-1.59870317096286	-2.84633766432286
AL3G11650	AT3G02350	OG0005262	GAUT9	protein_coding	galacturonosyltransferase 9	galacturonosyltransferase 9	galacturonosyltransferase 9 (GAUT9)%3B CONTAINS InterPro DOMAIN/s: Glycosyl transferase%2C family 8 (InterPro:IPR002495)%3B BEST Arabidopsis thaliana protein match is: Nucleotide-diphospho-sugar transferases superfamily protein (TAIR:AT3G25140.1)%3B Has 1426 Blast hits to 1422 proteins in 244 species: Archae - 0%3B Bacteria - 444%3B Metazoa - 141%3B Fungi - 7%3B Plants - 818%3B Viruses - 0%3B Oth…	Encodes a protein with putative galacturonosyltransferase activity.	galacturonosyltransferase 9 (GAUT9)%3B CONTAINS InterPro DOMAIN/s: Glycosyl transferase%2C family 8 (InterPro:IPR002495)%3B BEST Arabidopsis thaliana protein match is: Nucleotide-diphospho-sugar transferases superfamily protein (TAIR:AT3G25140.1)%3B Has 1426 Blast hits to 1422 proteins in 244 species: Archae - 0%3B Bacteria - 444%3B Metazoa - 141%3B Fungi - 7%3B Plants - 818%3B Viruses - 0%3B Oth…	scaffold_3	575035	577390	2356	+	scaffold_3	576577	576785	209	*	0.181146928461877	-0.199125471263772	271.42292660467	0.324305555555556	3.91850321200614	0.0134814066274	30.3998	0.228194444444444	0.282916666666667	0.0673015873015873	0.357177419354839	0.564444444444444	0.33625	NO	NO	NO	NO	NO	C	A	-1.32049292796984	0.278210242993022	-1.99115325325999	0.855184411062869	-0.676860221305308	1.05378122233507	-1.71289347690363	1.0865491606345	-1.59870317096286	-2.84633766432286
AL3G11650	AT3G02350	OG0005262	GAUT9	protein_coding	galacturonosyltransferase 9	galacturonosyltransferase 9	galacturonosyltransferase 9 (GAUT9)%3B CONTAINS InterPro DOMAIN/s: Glycosyl transferase%2C family 8 (InterPro:IPR002495)%3B BEST Arabidopsis thaliana protein match is: Nucleotide-diphospho-sugar transferases superfamily protein (TAIR:AT3G25140.1)%3B Has 1426 Blast hits to 1422 proteins in 244 species: Archae - 0%3B Bacteria - 444%3B Metazoa - 141%3B Fungi - 7%3B Plants - 818%3B Viruses - 0%3B Oth…	Encodes a protein with putative galacturonosyltransferase activity.	galacturonosyltransferase 9 (GAUT9)%3B CONTAINS InterPro DOMAIN/s: Glycosyl transferase%2C family 8 (InterPro:IPR002495)%3B BEST Arabidopsis thaliana protein match is: Nucleotide-diphospho-sugar transferases superfamily protein (TAIR:AT3G25140.1)%3B Has 1426 Blast hits to 1422 proteins in 244 species: Archae - 0%3B Bacteria - 444%3B Metazoa - 141%3B Fungi - 7%3B Plants - 818%3B Viruses - 0%3B Oth…	scaffold_3	575035	577390	2356	+	scaffold_3	573703	574189	487	*	0.125362333624059	-0.124872087728313	189.049187069876	0.266597222222222	3.46601020365876	0.00330949301573	3.6522	0.110138888888889	0.195138888888889	0.107301587301587	0.315887096774194	0.428888888888889	0.31875	NO	NO	NO	NO	NO	C	A	-1.62170480137901	0.360047945992864	-0.654236068928281	-0.263212447476836	-0.978072094714478	1.13561892533492	-0.375976292571919	-0.0318476979052027	-1.98175274737187	-0.391023621451445
AL3G11650	AT3G02350	OG0005262	GAUT9	protein_coding	galacturonosyltransferase 9	galacturonosyltransferase 9	galacturonosyltransferase 9 (GAUT9)%3B CONTAINS InterPro DOMAIN/s: Glycosyl transferase%2C family 8 (InterPro:IPR002495)%3B BEST Arabidopsis thaliana protein match is: Nucleotide-diphospho-sugar transferases superfamily protein (TAIR:AT3G25140.1)%3B Has 1426 Blast hits to 1422 proteins in 244 species: Archae - 0%3B Bacteria - 444%3B Metazoa - 141%3B Fungi - 7%3B Plants - 818%3B Viruses - 0%3B Oth…	Encodes a protein with putative galacturonosyltransferase activity.	galacturonosyltransferase 9 (GAUT9)%3B CONTAINS InterPro DOMAIN/s: Glycosyl transferase%2C family 8 (InterPro:IPR002495)%3B BEST Arabidopsis thaliana protein match is: Nucleotide-diphospho-sugar transferases superfamily protein (TAIR:AT3G25140.1)%3B Has 1426 Blast hits to 1422 proteins in 244 species: Archae - 0%3B Bacteria - 444%3B Metazoa - 141%3B Fungi - 7%3B Plants - 818%3B Viruses - 0%3B Oth…	scaffold_3	575035	577390	2356	+	scaffold_3	576577	576785	209	*	0.181146928461877	-0.199125471263772	271.42292660467	0.324305555555556	3.91850321200614	0.0134814066274	30.3998	0.228194444444444	0.282916666666667	0.0673015873015873	0.357177419354839	0.564444444444444	0.33625	NO	MODERATE	NO	NO	NO	C	A	-1.32049292796984	0.278210242993022	-1.99115325325999	0.855184411062869	-0.676860221305308	1.05378122233507	-1.71289347690363	1.0865491606345	-1.59870317096286	-2.84633766432286
AL3G21150	AT5G03530	OG0001181	RABC2A	protein_coding	RAB GTPase homolog C2A	RAB GTPase homolog C2A	RAB GTPase homolog C2A (RABC2A)%3B FUNCTIONS IN: GTP binding%2C myosin XI tail binding%2C GTP-dependent protein binding%3B INVOLVED IN: protein transport%2C small GTPase mediated signal transduction%2C regulation of transcription%2C D-dependent%3B LOCATED IN: peroxisome%3B EXPRESSED IN: 20 plant structures%3B EXPRESSED DURING: 12 growth stages%3B CONTAINS InterPro DOMAIN/s: Ras (InterPro:IPR01375…	Encodes a member of the Rab GTPase family of proteins. This protein interacts with the tail region of a myosin XI protein (AT5G43900) in a GTP-dependent manner. CFP:RabC2a appears to co-localize with peroxisomes.	RAB GTPase homolog C2A (RABC2A)%3B FUNCTIONS IN: GTP binding%2C myosin XI tail binding%2C GTP-dependent protein binding%3B INVOLVED IN: protein transport%2C small GTPase mediated signal transduction%2C regulation of transcription%2C D-dependent%3B LOCATED IN: peroxisome%3B EXPRESSED IN: 20 plant structures%3B EXPRESSED DURING: 12 growth stages%3B CONTAINS InterPro DOMAIN/s: Ras (InterPro:IPR01375…	scaffold_3	3914376	3915838	1463	-	scaffold_3	3914508	3914786	279	*	0.12161293923499	0.038459738580317	263.94112655709	0.383888888888889	1.25214075864166	0.0549165281022	15.5523	-0.218888888888889	0.279444444444444	0.329587301587302	0.243064516129032	0.481111111111111	0.7	NO	MODERATE	NO	NO	NO	C	B	1.57725588426352	-0.656103532921902	-1.94848568354727	-0.0266284966318992	2.22088859092805	0.119467446420149	-1.67022590719091	0.204736252939734	2.23335941718542	-1.92185718691537
AL3G21150	AT3G09910	OG0001181	RABC2b	protein_coding	RAB GTPase homolog C2B	RAB GTPase homolog C2B	RAB GTPase homolog C2B (RABC2b)%3B FUNCTIONS IN: GTP binding%2C transcription factor binding%2C ATP binding%3B INVOLVED IN: protein transport%2C small GTPase mediated signal transduction%2C regulation of transcription%2C D-dependent%3B LOCATED IN: endomembrane system%2C intracellular%3B EXPRESSED IN: sepal%2C root%2C carpel%3B EXPRESSED DURING: 4 anthesis%2C petal differentiation and expansion st…	.	RAB GTPase homolog C2B (RABC2b)%3B FUNCTIONS IN: GTP binding%2C transcription factor binding%2C ATP binding%3B INVOLVED IN: protein transport%2C small GTPase mediated signal transduction%2C regulation of transcription%2C D-dependent%3B LOCATED IN: endomembrane system%2C intracellular%3B EXPRESSED IN: sepal%2C root%2C carpel%3B EXPRESSED DURING: 4 anthesis%2C petal differentiation and expansion st…	scaffold_3	3914376	3915838	1463	-	scaffold_3	3914508	3914786	279	*	0.12161293923499	0.038459738580317	263.94112655709	0.383888888888889	1.25214075864166	0.0549165281022	15.5523	-0.218888888888889	0.279444444444444	0.329587301587302	0.243064516129032	0.481111111111111	0.7	NO	MODERATE	NO	NO	NO	C	B	1.57725588426352	-0.656103532921902	-1.94848568354727	-0.0266284966318992	2.22088859092805	0.119467446420149	-1.67022590719091	0.204736252939734	2.23335941718542	-1.92185718691537
AL3G22160	AT3G10690	OG0011752	GYRA	protein_coding	D GYRASE A	D GYRASE A	D GYRASE A (GYRA)%3B FUNCTIONS IN: D topoisomerase activity%2C catalytic activity%2C ATP binding%3B INVOLVED IN: D topological change%2C D metabolic process%3B LOCATED IN: mitochondrion%2C chloroplast%2C nucleoid%3B EXPRESSED IN: 22 plant structures%3B EXPRESSED DURING: 13 growth stages%3B CONTAINS InterPro DOMAIN/s: D gyrase%2C subunit A (InterPro:IPR005743)%2C D topoisomerase%2C type IIA%2C sub…	.	D GYRASE A (GYRA)%3B FUNCTIONS IN: D topoisomerase activity%2C catalytic activity%2C ATP binding%3B INVOLVED IN: D topological change%2C D metabolic process%3B LOCATED IN: mitochondrion%2C chloroplast%2C nucleoid%3B EXPRESSED IN: 22 plant structures%3B EXPRESSED DURING: 13 growth stages%3B CONTAINS InterPro DOMAIN/s: D gyrase%2C subunit A (InterPro:IPR005743)%2C D topoisomerase%2C type IIA%2C sub…	scaffold_3	4282480	4289769	7290	-	scaffold_3	4286723	4287210	488	*	0.157567856806856	-0.0563898934718763	260.382786991399	0.432361111111111	2.1009951004688	0.0530267198856	9.0487	0.208194444444444	0.337638888888889	0.252380952380952	0.3375	0.474444444444444	0.26625	NO	NO	NO	NO	NO	B	B	0.414306282792755	1.85767791089008	-3.00020384927294	0.82855591443097	1.05793898945729	2.63324889023213	-2.72194407291658	1.0599206640026	-1.44337162809732	-3.82875976370391
AL3G22160	AT3G10690	OG0011752	GYRA	protein_coding	D GYRASE A	D GYRASE A	D GYRASE A (GYRA)%3B FUNCTIONS IN: D topoisomerase activity%2C catalytic activity%2C ATP binding%3B INVOLVED IN: D topological change%2C D metabolic process%3B LOCATED IN: mitochondrion%2C chloroplast%2C nucleoid%3B EXPRESSED IN: 22 plant structures%3B EXPRESSED DURING: 13 growth stages%3B CONTAINS InterPro DOMAIN/s: D gyrase%2C subunit A (InterPro:IPR005743)%2C D topoisomerase%2C type IIA%2C sub…	.	D GYRASE A (GYRA)%3B FUNCTIONS IN: D topoisomerase activity%2C catalytic activity%2C ATP binding%3B INVOLVED IN: D topological change%2C D metabolic process%3B LOCATED IN: mitochondrion%2C chloroplast%2C nucleoid%3B EXPRESSED IN: 22 plant structures%3B EXPRESSED DURING: 13 growth stages%3B CONTAINS InterPro DOMAIN/s: D gyrase%2C subunit A (InterPro:IPR005743)%2C D topoisomerase%2C type IIA%2C sub…	scaffold_3	4282480	4289769	7290	-	scaffold_3	4286723	4287210	488	*	0.157567856806856	-0.0563898934718763	260.382786991399	0.432361111111111	2.1009951004688	0.0530267198856	9.0487	0.208194444444444	0.337638888888889	0.252380952380952	0.3375	0.474444444444444	0.26625	NO	NO	NO	NO	NO	C	B	0.414306282792755	1.85767791089008	-3.00020384927294	0.82855591443097	1.05793898945729	2.63324889023213	-2.72194407291658	1.0599206640026	-1.44337162809732	-3.82875976370391
AL3G22160	AT3G10690	OG0011752	GYRA	protein_coding	D GYRASE A	D GYRASE A	D GYRASE A (GYRA)%3B FUNCTIONS IN: D topoisomerase activity%2C catalytic activity%2C ATP binding%3B INVOLVED IN: D topological change%2C D metabolic process%3B LOCATED IN: mitochondrion%2C chloroplast%2C nucleoid%3B EXPRESSED IN: 22 plant structures%3B EXPRESSED DURING: 13 growth stages%3B CONTAINS InterPro DOMAIN/s: D gyrase%2C subunit A (InterPro:IPR005743)%2C D topoisomerase%2C type IIA%2C sub…	.	D GYRASE A (GYRA)%3B FUNCTIONS IN: D topoisomerase activity%2C catalytic activity%2C ATP binding%3B INVOLVED IN: D topological change%2C D metabolic process%3B LOCATED IN: mitochondrion%2C chloroplast%2C nucleoid%3B EXPRESSED IN: 22 plant structures%3B EXPRESSED DURING: 13 growth stages%3B CONTAINS InterPro DOMAIN/s: D gyrase%2C subunit A (InterPro:IPR005743)%2C D topoisomerase%2C type IIA%2C sub…	scaffold_3	4282480	4289769	7290	-	scaffold_3	4286723	4287210	488	*	0.157567856806856	-0.0563898934718763	260.382786991399	0.432361111111111	2.1009951004688	0.0530267198856	9.0487	0.208194444444444	0.337638888888889	0.252380952380952	0.3375	0.474444444444444	0.26625	NO	MODERATE	NO	NO	NO	C	B	0.414306282792755	1.85767791089008	-3.00020384927294	0.82855591443097	1.05793898945729	2.63324889023213	-2.72194407291658	1.0599206640026	-1.44337162809732	-3.82875976370391
AL3G23610	AT3G12000	OG0007292	.	protein_coding	S-locus related protein SLR1%2C putative (S1)	.	S-locus related protein SLR1%2C putative (S1)%3B FUNCTIONS IN: sugar binding%3B INVOLVED IN: recognition of pollen%3B LOCATED IN: endomembrane system%3B EXPRESSED IN: 8 plant structures%3B EXPRESSED DURING: 4 anthesis%2C C globular stage%2C petal differentiation and expansion stage%3B CONTAINS InterPro DOMAIN/s: Curculin-like (mannose-binding) lectin (InterPro:IPR001480)%2C PAN-2 domain (InterPro…	.	S-locus related protein SLR1%2C putative (S1)%3B FUNCTIONS IN: sugar binding%3B INVOLVED IN: recognition of pollen%3B LOCATED IN: endomembrane system%3B EXPRESSED IN: 8 plant structures%3B EXPRESSED DURING: 4 anthesis%2C C globular stage%2C petal differentiation and expansion stage%3B CONTAINS InterPro DOMAIN/s: Curculin-like (mannose-binding) lectin (InterPro:IPR001480)%2C PAN-2 domain (InterPro…	scaffold_3	4845233	4846338	1106	-	scaffold_3	4844852	4845303	452	*	0.15376618601341	-0.0597149341748046	245.084497406861	0.407777777777778	2.60904058441572	0.00555134664367	11.7349	-0.114166666666667	0.312222222222222	0.236380952380952	0.313064516129032	0.223333333333333	0.3375	NO	MODERATE	NO	0.944444444444444	1	C	B	-0.190382214953478	0.0708880620600764	0.0494045544041928	-0.119828234843536	0.453250491711054	0.846459041402128	0.327664330760554	0.111536514728097	-0.261270277013554	0.169232789247729
AL3G26210	AT3G14010	OG0007878	CID4	protein_coding	CTC-interacting domain 4	CTC-interacting domain 4	CTC-interacting domain 4 (CID4)%3B CONTAINS InterPro DOMAIN/s: LsmAD domain (InterPro:IPR009604)%2C Ataxin-2%2C C-terminal (InterPro:IPR009818)%3B BEST Arabidopsis thaliana protein match is: CTC-interacting domain 3 (TAIR:AT1G54170.1)%3B Has 13166 Blast hits to 6516 proteins in 672 species: Archae - 9%3B Bacteria - 1476%3B Metazoa - 3492%3B Fungi - 1698%3B Plants - 664%3B Viruses - 94%3B Other Eu…	hydroxyproline-rich glycoprotein family protein%2C similar to Mrs16p (GI:2737884) (Saccharomyces cerevisiae)%3B weak similarity to ataxin-2 related protein (GI:1679686) (Homo sapiens). Included in a family of CTC interacting domain proteins found to interact with PAB2.	CTC-interacting domain 4 (CID4)%3B CONTAINS InterPro DOMAIN/s: LsmAD domain (InterPro:IPR009604)%2C Ataxin-2%2C C-terminal (InterPro:IPR009818)%3B BEST Arabidopsis thaliana protein match is: CTC-interacting domain 3 (TAIR:AT1G54170.1)%3B Has 13166 Blast hits to 6516 proteins in 672 species: Archae - 9%3B Bacteria - 1476%3B Metazoa - 3492%3B Fungi - 1698%3B Plants - 664%3B Viruses - 94%3B Other Eu…	scaffold_3	5788291	5792991	4701	+	scaffold_3	5789860	5790238	379	*	0.169092047785167	-0.14123256567705	223.854010484889	0.364444444444444	2.48142203867162	0.00456297017658	13.2128	-0.24875	0.310972222222222	0.145206349206349	0.28508064516129	0.15	0.39875	NO	NO	NO	0.0555555555555556	0.1875	B	B	-2.02143334015132	0.280938166426356	0.388499450542081	-1.240273439278	-1.37780063348679	1.05650914576841	0.666759226898443	-1.00890868970637	-2.30237150657768	1.62877288982008
AL3G26210	AT3G14010	OG0007878	CID4	protein_coding	CTC-interacting domain 4	CTC-interacting domain 4	CTC-interacting domain 4 (CID4)%3B CONTAINS InterPro DOMAIN/s: LsmAD domain (InterPro:IPR009604)%2C Ataxin-2%2C C-terminal (InterPro:IPR009818)%3B BEST Arabidopsis thaliana protein match is: CTC-interacting domain 3 (TAIR:AT1G54170.1)%3B Has 13166 Blast hits to 6516 proteins in 672 species: Archae - 9%3B Bacteria - 1476%3B Metazoa - 3492%3B Fungi - 1698%3B Plants - 664%3B Viruses - 94%3B Other Eu…	hydroxyproline-rich glycoprotein family protein%2C similar to Mrs16p (GI:2737884) (Saccharomyces cerevisiae)%3B weak similarity to ataxin-2 related protein (GI:1679686) (Homo sapiens). Included in a family of CTC interacting domain proteins found to interact with PAB2.	CTC-interacting domain 4 (CID4)%3B CONTAINS InterPro DOMAIN/s: LsmAD domain (InterPro:IPR009604)%2C Ataxin-2%2C C-terminal (InterPro:IPR009818)%3B BEST Arabidopsis thaliana protein match is: CTC-interacting domain 3 (TAIR:AT1G54170.1)%3B Has 13166 Blast hits to 6516 proteins in 672 species: Archae - 9%3B Bacteria - 1476%3B Metazoa - 3492%3B Fungi - 1698%3B Plants - 664%3B Viruses - 94%3B Other Eu…	scaffold_3	5788291	5792991	4701	+	scaffold_3	5789860	5790238	379	*	0.169092047785167	-0.14123256567705	223.854010484889	0.364444444444444	2.48142203867162	0.00456297017658	13.2128	-0.24875	0.310972222222222	0.145206349206349	0.28508064516129	0.15	0.39875	NO	NO	NO	0.0555555555555556	0.1875	C	B	-2.02143334015132	0.280938166426356	0.388499450542081	-1.240273439278	-1.37780063348679	1.05650914576841	0.666759226898443	-1.00890868970637	-2.30237150657768	1.62877288982008
AL3G26610	AT3G14290	OG0001232	PAE2	protein_coding	20S proteasome alpha subunit E2	20S proteasome alpha subunit E2	20S proteasome alpha subunit E2 (PAE2)%3B FUNCTIONS IN: peptidase activity%2C endopeptidase activity%2C threonine-type endopeptidase activity%3B INVOLVED IN: ubiquitin-dependent protein catabolic process%3B LOCATED IN: proteasome core complex%2C proteasome complex%2C cytosolic ribosome%3B EXPRESSED IN: 23 plant structures%3B EXPRESSED DURING: 15 growth stages%3B CONTAINS InterPro DOMAIN/s: Protea…	Encodes 20S proteasome subunit PAE2 (PAE2) that has RNase activity.	20S proteasome alpha subunit E2 (PAE2)%3B FUNCTIONS IN: peptidase activity%2C endopeptidase activity%2C threonine-type endopeptidase activity%3B INVOLVED IN: ubiquitin-dependent protein catabolic process%3B LOCATED IN: proteasome core complex%2C proteasome complex%2C cytosolic ribosome%3B EXPRESSED IN: 23 plant structures%3B EXPRESSED DURING: 15 growth stages%3B CONTAINS InterPro DOMAIN/s: Protea…	scaffold_3	5959722	5963104	3383	+	scaffold_3	5960312	5960586	275	*	0.0654559637845263	-0.152271083316319	104.685339538075	0.113541666666667	1.65218086719861	0.0496951484715	7.4587	-0.0538888888888889	0.0975	0.0295873015873016	0.174516129032258	0.211111111111111	0.265	NO	NO	NO	0.0277777777777778	0	C	B	-2.21733429541368	-0.885249101321471	-0.616808376197826	-1.73904566465239	-1.57370158874915	-0.10967812197942	-0.338548599841464	-1.50768091508076	-1.33208519409221	1.12223728845456
AL3G26610	AT1G53850	OG0001232	PAE1	protein_coding	20S proteasome alpha subunit E1	20S proteasome alpha subunit E1	20S proteasome alpha subunit E1 (PAE1)%3B FUNCTIONS IN: peptidase activity%2C endopeptidase activity%2C threonine-type endopeptidase activity%3B INVOLVED IN: response to cadmium ion%2C ubiquitin-dependent protein catabolic process%3B LOCATED IN: proteasome core complex%2C proteasome complex%2C cytosolic ribosome%2C plasma membrane%3B EXPRESSED IN: 24 plant structures%3B EXPRESSED DURING: 13 growt…	Encodes alpha5 subunit of 20s proteosome involved in protein degradation and R degradation.	20S proteasome alpha subunit E1 (PAE1)%3B FUNCTIONS IN: peptidase activity%2C endopeptidase activity%2C threonine-type endopeptidase activity%3B INVOLVED IN: response to cadmium ion%2C ubiquitin-dependent protein catabolic process%3B LOCATED IN: proteasome core complex%2C proteasome complex%2C cytosolic ribosome%2C plasma membrane%3B EXPRESSED IN: 24 plant structures%3B EXPRESSED DURING: 13 growt…	scaffold_3	5959722	5963104	3383	+	scaffold_3	5960312	5960586	275	*	0.0654559637845263	-0.152271083316319	104.685339538075	0.113541666666667	1.65218086719861	0.0496951484715	7.4587	-0.0538888888888889	0.0975	0.0295873015873016	0.174516129032258	0.211111111111111	0.265	NO	NO	NO	0.0277777777777778	0	C	B	-2.21733429541368	-0.885249101321471	-0.616808376197826	-1.73904566465239	-1.57370158874915	-0.10967812197942	-0.338548599841464	-1.50768091508076	-1.33208519409221	1.12223728845456
AL3G30840	AT3G17700	OG0002189	CNBT1	protein_coding	cyclic nucleotide-binding transporter 1	cyclic nucleotide-binding transporter 1	cyclic nucleotide-binding transporter 1 (CNBT1)%3B FUNCTIONS IN: ion channel activity%2C cyclic nucleotide binding%2C calmodulin binding%3B INVOLVED IN: response to nematode%3B LOCATED IN: chloroplast%2C membrane%3B EXPRESSED IN: 21 plant structures%3B EXPRESSED DURING: 13 growth stages%3B CONTAINS InterPro DOMAIN/s: Cyclic nucleotide-binding (InterPro:IPR000595)%2C Ion transport (InterPro:IPR005…	cyclic nucleotide-binding transporter 1%2C member of a family of cyclic nucleotide gated channels.	cyclic nucleotide-binding transporter 1 (CNBT1)%3B FUNCTIONS IN: ion channel activity%2C cyclic nucleotide binding%2C calmodulin binding%3B INVOLVED IN: response to nematode%3B LOCATED IN: chloroplast%2C membrane%3B EXPRESSED IN: 21 plant structures%3B EXPRESSED DURING: 13 growth stages%3B CONTAINS InterPro DOMAIN/s: Cyclic nucleotide-binding (InterPro:IPR000595)%2C Ion transport (InterPro:IPR005…	scaffold_3	7555599	7559183	3585	+	scaffold_3	7556007	7556470	464	*	0.230773979123908	0.0928514555125453	289.20551211258	0.367430555555556	4.28580411677	0.0204574931047	6.9891	0.287222222222222	0.352777777777778	0.425523809523809	0.0501612903225806	0.342222222222222	0.055	NO	NO	NO	NO	NO	C	B	1.77881871684559	-2.98165825983423	-0.0636270776417674	-0.183326957581144	2.42245142351012	-2.20608728049218	0.214632698714594	0.0480377919904892	4.76047697667982	0.119699879939377
AL3G30840	AT3G17700	OG0002189	CNBT1	protein_coding	cyclic nucleotide-binding transporter 1	cyclic nucleotide-binding transporter 1	cyclic nucleotide-binding transporter 1 (CNBT1)%3B FUNCTIONS IN: ion channel activity%2C cyclic nucleotide binding%2C calmodulin binding%3B INVOLVED IN: response to nematode%3B LOCATED IN: chloroplast%2C membrane%3B EXPRESSED IN: 21 plant structures%3B EXPRESSED DURING: 13 growth stages%3B CONTAINS InterPro DOMAIN/s: Cyclic nucleotide-binding (InterPro:IPR000595)%2C Ion transport (InterPro:IPR005…	cyclic nucleotide-binding transporter 1%2C member of a family of cyclic nucleotide gated channels.	cyclic nucleotide-binding transporter 1 (CNBT1)%3B FUNCTIONS IN: ion channel activity%2C cyclic nucleotide binding%2C calmodulin binding%3B INVOLVED IN: response to nematode%3B LOCATED IN: chloroplast%2C membrane%3B EXPRESSED IN: 21 plant structures%3B EXPRESSED DURING: 13 growth stages%3B CONTAINS InterPro DOMAIN/s: Cyclic nucleotide-binding (InterPro:IPR000595)%2C Ion transport (InterPro:IPR005…	scaffold_3	7555599	7559183	3585	+	scaffold_3	7556007	7556470	464	*	0.230773979123908	0.0928514555125453	289.20551211258	0.367430555555556	4.28580411677	0.0204574931047	6.9891	0.287222222222222	0.352777777777778	0.425523809523809	0.0501612903225806	0.342222222222222	0.055	NO	NO	NO	NO	NO	C	B	1.77881871684559	-2.98165825983423	-0.0636270776417674	-0.183326957581144	2.42245142351012	-2.20608728049218	0.214632698714594	0.0480377919904892	4.76047697667982	0.119699879939377
AL3G34010	AT3G20290	OG0010240	EHD1	protein_coding	EPS15 homology domain 1	EPS15 homology domain 1	EPS15 homology domain 1 (EHD1)%3B FUNCTIONS IN: GTP binding%2C GTPase activity%2C calcium ion binding%3B INVOLVED IN: endocytosis%3B LOCATED IN: endosome%2C microsome%2C membrane%2C cytoplasm%3B EXPRESSED IN: 24 plant structures%3B EXPRESSED DURING: 15 growth stages%3B CONTAINS InterPro DOMAIN/s: EF-HAND 2 (InterPro:IPR018249)%2C EPS15 homology (EH) (InterPro:IPR000261)%2C Dynamin%2C GTPase domai…	Encodes AtEHD1%2C one of the Arabidopsis Eps15 homology domain proteins involved in endocytosis (AtEHD2%2C At4g05520).	EPS15 homology domain 1 (EHD1)%3B FUNCTIONS IN: GTP binding%2C GTPase activity%2C calcium ion binding%3B INVOLVED IN: endocytosis%3B LOCATED IN: endosome%2C microsome%2C membrane%2C cytoplasm%3B EXPRESSED IN: 24 plant structures%3B EXPRESSED DURING: 15 growth stages%3B CONTAINS InterPro DOMAIN/s: EF-HAND 2 (InterPro:IPR018249)%2C EPS15 homology (EH) (InterPro:IPR000261)%2C Dynamin%2C GTPase domai…	scaffold_3	8858737	8862760	4024	-	scaffold_3	8860824	8861135	312	*	0.102315761762521	0.0467532721940824	251.76728588861	0.406527777777778	1.01342579103612	0.093481103325	6.4649	0.211111111111111	0.274444444444444	0.336380952380952	0.29258064516129	0.471111111111111	0.26	NO	MODERATE	NO	NO	NO	C	B	2.3370798205701	0.867441704591918	-1.64831558784906	0.314421094845868	2.98071252723463	1.64301268393397	-1.3700558114927	0.545785844417501	1.46963811597818	-1.96273668269493
AL3G36430	AT3G22220	OG0001397	.	protein_coding	hAT transposon superfamily	.	hAT transposon superfamily%3B FUNCTIONS IN: protein dimerization activity%2C D binding%3B INVOLVED IN: biological_process unknown%3B LOCATED IN: cellular_component unknown%3B EXPRESSED IN: 23 plant structures%3B EXPRESSED DURING: 13 growth stages%3B CONTAINS InterPro DOMAIN/s: HAT dimerisation (InterPro:IPR008906)%2C Zinc finger%2C BED-type predicted (InterPro:IPR003656)%2C Protein of unknown fun…	.	hAT transposon superfamily%3B FUNCTIONS IN: protein dimerization activity%2C D binding%3B INVOLVED IN: biological_process unknown%3B LOCATED IN: cellular_component unknown%3B EXPRESSED IN: 23 plant structures%3B EXPRESSED DURING: 13 growth stages%3B CONTAINS InterPro DOMAIN/s: HAT dimerisation (InterPro:IPR008906)%2C Zinc finger%2C BED-type predicted (InterPro:IPR003656)%2C Protein of unknown fun…	scaffold_3	9876218	9879526	3309	-	scaffold_3	9878107	9878431	325	*	0.162110673096588	-0.0989872675962926	243.729787705317	0.384166666666667	2.64036550020464	0.00456297017658	8.0559	0.109027777777778	0.305694444444444	0.189587301587302	0.348629032258065	0.417777777777778	0.30875	NO	NO	NO	NO	NO	C	A	-0.462152326300094	1.1347782010581	-3.47179277767662	-0.140311693791151	0.181480380364438	1.91034918040015	-3.19353300132026	0.0910530557804823	-1.59693052735819	-3.33148108388547
AL3G36430	AT3G22220	OG0001397	.	protein_coding	hAT transposon superfamily	.	hAT transposon superfamily%3B FUNCTIONS IN: protein dimerization activity%2C D binding%3B INVOLVED IN: biological_process unknown%3B LOCATED IN: cellular_component unknown%3B EXPRESSED IN: 23 plant structures%3B EXPRESSED DURING: 13 growth stages%3B CONTAINS InterPro DOMAIN/s: HAT dimerisation (InterPro:IPR008906)%2C Zinc finger%2C BED-type predicted (InterPro:IPR003656)%2C Protein of unknown fun…	.	hAT transposon superfamily%3B FUNCTIONS IN: protein dimerization activity%2C D binding%3B INVOLVED IN: biological_process unknown%3B LOCATED IN: cellular_component unknown%3B EXPRESSED IN: 23 plant structures%3B EXPRESSED DURING: 13 growth stages%3B CONTAINS InterPro DOMAIN/s: HAT dimerisation (InterPro:IPR008906)%2C Zinc finger%2C BED-type predicted (InterPro:IPR003656)%2C Protein of unknown fun…	scaffold_3	9876218	9879526	3309	-	scaffold_3	9878107	9878431	325	*	0.162110673096588	-0.0989872675962926	243.729787705317	0.384166666666667	2.64036550020464	0.00456297017658	8.0559	0.109027777777778	0.305694444444444	0.189587301587302	0.348629032258065	0.417777777777778	0.30875	NO	NO	NO	NO	NO	C	A	-0.462152326300094	1.1347782010581	-3.47179277767662	-0.140311693791151	0.181480380364438	1.91034918040015	-3.19353300132026	0.0910530557804823	-1.59693052735819	-3.33148108388547
AL3G36430	AT4G15020	OG0001397	.	protein_coding	hAT transposon superfamily	.	hAT transposon superfamily%3B FUNCTIONS IN: protein dimerization activity%2C D binding%3B INVOLVED IN: biological_process unknown%3B LOCATED IN: cellular_component unknown%3B EXPRESSED IN: 19 plant structures%3B EXPRESSED DURING: 8 growth stages%3B CONTAINS InterPro DOMAIN/s: HAT dimerisation (InterPro:IPR008906)%2C Zinc finger%2C BED-type predicted (InterPro:IPR003656)%2C Protein of unknown func…	.	hAT transposon superfamily%3B FUNCTIONS IN: protein dimerization activity%2C D binding%3B INVOLVED IN: biological_process unknown%3B LOCATED IN: cellular_component unknown%3B EXPRESSED IN: 19 plant structures%3B EXPRESSED DURING: 8 growth stages%3B CONTAINS InterPro DOMAIN/s: HAT dimerisation (InterPro:IPR008906)%2C Zinc finger%2C BED-type predicted (InterPro:IPR003656)%2C Protein of unknown func…	scaffold_3	9876218	9879526	3309	-	scaffold_3	9878107	9878431	325	*	0.162110673096588	-0.0989872675962926	243.729787705317	0.384166666666667	2.64036550020464	0.00456297017658	8.0559	0.109027777777778	0.305694444444444	0.189587301587302	0.348629032258065	0.417777777777778	0.30875	NO	NO	NO	NO	NO	C	A	-0.462152326300094	1.1347782010581	-3.47179277767662	-0.140311693791151	0.181480380364438	1.91034918040015	-3.19353300132026	0.0910530557804823	-1.59693052735819	-3.33148108388547
AL3G36430	AT4G15020	OG0001397	.	protein_coding	hAT transposon superfamily	.	hAT transposon superfamily%3B FUNCTIONS IN: protein dimerization activity%2C D binding%3B INVOLVED IN: biological_process unknown%3B LOCATED IN: cellular_component unknown%3B EXPRESSED IN: 19 plant structures%3B EXPRESSED DURING: 8 growth stages%3B CONTAINS InterPro DOMAIN/s: HAT dimerisation (InterPro:IPR008906)%2C Zinc finger%2C BED-type predicted (InterPro:IPR003656)%2C Protein of unknown func…	.	hAT transposon superfamily%3B FUNCTIONS IN: protein dimerization activity%2C D binding%3B INVOLVED IN: biological_process unknown%3B LOCATED IN: cellular_component unknown%3B EXPRESSED IN: 19 plant structures%3B EXPRESSED DURING: 8 growth stages%3B CONTAINS InterPro DOMAIN/s: HAT dimerisation (InterPro:IPR008906)%2C Zinc finger%2C BED-type predicted (InterPro:IPR003656)%2C Protein of unknown func…	scaffold_3	9876218	9879526	3309	-	scaffold_3	9878107	9878431	325	*	0.162110673096588	-0.0989872675962926	243.729787705317	0.384166666666667	2.64036550020464	0.00456297017658	8.0559	0.109027777777778	0.305694444444444	0.189587301587302	0.348629032258065	0.417777777777778	0.30875	NO	NO	NO	NO	NO	C	A	-0.462152326300094	1.1347782010581	-3.47179277767662	-0.140311693791151	0.181480380364438	1.91034918040015	-3.19353300132026	0.0910530557804823	-1.59693052735819	-3.33148108388547
AL3G40620	AT3G24840	OG0018835	.	protein_coding	Sec14p-like phosphatidylinositol transfer family protein	.	Sec14p-like phosphatidylinositol transfer family protein%3B FUNCTIONS IN: transporter activity%3B INVOLVED IN: transport%3B LOCATED IN: intracellular%3B EXPRESSED IN: 17 plant structures%3B EXPRESSED DURING: 9 growth stages%3B CONTAINS InterPro DOMAIN/s: Cellular retinaldehyde-binding/triple function%2C C-terminal (InterPro:IPR001251)%2C Cellular retinaldehyde-binding/triple function%2C N-termina…	.	Sec14p-like phosphatidylinositol transfer family protein%3B FUNCTIONS IN: transporter activity%3B INVOLVED IN: transport%3B LOCATED IN: intracellular%3B EXPRESSED IN: 17 plant structures%3B EXPRESSED DURING: 9 growth stages%3B CONTAINS InterPro DOMAIN/s: Cellular retinaldehyde-binding/triple function%2C C-terminal (InterPro:IPR001251)%2C Cellular retinaldehyde-binding/triple function%2C N-termina…	scaffold_3	12305535	12309480	3946	+	scaffold_3	12308744	12308948	205	*	0.140278486886793	-0.148363603860961	199.667055387839	0.277430555555556	2.4928911218704	0.0058868387611	6.4208	0.0748611111111111	0.232916666666667	0.0994920634920635	0.278790322580645	0.401111111111111	0.32625	NO	NO	NO	NO	NO	C	B	-2.22186379726945	-0.531983016705473	0.269479387659248	0.541787489164378	-1.57823109060492	0.243587962636578	0.54773916401561	0.773152238736011	-1.68988078056398	-0.27230810150513
AL4G11280	AT2G21960	OG0018772	.	protein_coding	transmembrane protein	.	unknown protein%3B LOCATED IN: chloroplast%3B EXPRESSED IN: 22 plant structures%3B EXPRESSED DURING: 13 growth stages%3B BEST Arabidopsis thaliana protein match is: unknown protein (TAIR:AT1G56180.1)%3B Has 224 Blast hits to 222 proteins in 59 species: Archae - 0%3B Bacteria - 65%3B Metazoa - 0%3B Fungi - 0%3B Plants - 134%3B Viruses - 0%3B Other Eukaryotes - 25 (source: NCBI BLink).	.	unknown protein%3B LOCATED IN: chloroplast%3B EXPRESSED IN: 22 plant structures%3B EXPRESSED DURING: 13 growth stages%3B BEST Arabidopsis thaliana protein match is: unknown protein (TAIR:AT1G56180.1)%3B Has 224 Blast hits to 222 proteins in 59 species: Archae - 0%3B Bacteria - 65%3B Metazoa - 0%3B Fungi - 0%3B Plants - 134%3B Viruses - 0%3B Other Eukaryotes - 25 (source: NCBI BLink).	scaffold_4	624806	627059	2254	+	scaffold_4	626043	626300	258	*	0.145926163185632	-0.00280460263639869	235.158706400645	0.425416666666667	2.02215394577512	0.0259888292128	11.6223	0.302083333333333	0.319583333333333	0.303174603174603	0.280725806451613	0.523333333333333	0.22125	NO	NO	NO	NO	NO	C	A	0.808372944245353	0.240019314926428	-2.47022772020976	0.629866362639119	1.45200565090988	1.01559029426848	-2.1919679438534	0.861231112210752	0.568353629318925	-3.10009408284888
AL4G18250	AT2G26100	OG0018464	.	protein_coding	Galactosyltransferase family protein	.	Galactosyltransferase family protein%3B FUNCTIONS IN: transferase activity%2C transferring hexosyl groups%2C transferase activity%2C transferring glycosyl groups%3B INVOLVED IN: protein amino acid glycosylation%3B LOCATED IN: chloroplast%2C membrane%3B CONTAINS InterPro DOMAIN/s: Glycosyl transferase%2C family 31 (InterPro:IPR002659)%3B BEST Arabidopsis thaliana protein match is: Galactosyltransf…	.	Galactosyltransferase family protein%3B FUNCTIONS IN: transferase activity%2C transferring hexosyl groups%2C transferase activity%2C transferring glycosyl groups%3B INVOLVED IN: protein amino acid glycosylation%3B LOCATED IN: chloroplast%2C membrane%3B CONTAINS InterPro DOMAIN/s: Glycosyl transferase%2C family 31 (InterPro:IPR002659)%3B BEST Arabidopsis thaliana protein match is: Galactosyltransf…	scaffold_4	5651527	5653867	2341	-	scaffold_4	5652341	5652555	215	*	0.175693372434042	-0.0548704373313734	254.223930450732	0.461666666666667	2.89692598485328	0.0121885422993	20.4384	-0.30625	0.366805555555556	0.268190476190476	0.322338709677419	0.24	0.54625	NO	MODERATE	NO	NO	NO	C	B	-0.386283170215834	1.55215048635731	0.0950663395353443	-2.67821225740048	0.257349536448698	2.32772146569936	0.373326115891706	-2.44684750782885	-1.93843365657314	2.77327859693582
AL4G18250	AT2G26100	OG0018464	.	protein_coding	Galactosyltransferase family protein	.	Galactosyltransferase family protein%3B FUNCTIONS IN: transferase activity%2C transferring hexosyl groups%2C transferase activity%2C transferring glycosyl groups%3B INVOLVED IN: protein amino acid glycosylation%3B LOCATED IN: chloroplast%2C membrane%3B CONTAINS InterPro DOMAIN/s: Glycosyl transferase%2C family 31 (InterPro:IPR002659)%3B BEST Arabidopsis thaliana protein match is: Galactosyltransf…	.	Galactosyltransferase family protein%3B FUNCTIONS IN: transferase activity%2C transferring hexosyl groups%2C transferase activity%2C transferring glycosyl groups%3B INVOLVED IN: protein amino acid glycosylation%3B LOCATED IN: chloroplast%2C membrane%3B CONTAINS InterPro DOMAIN/s: Glycosyl transferase%2C family 31 (InterPro:IPR002659)%3B BEST Arabidopsis thaliana protein match is: Galactosyltransf…	scaffold_4	5651527	5653867	2341	-	scaffold_4	5652341	5652555	215	*	0.175693372434042	-0.0548704373313734	254.223930450732	0.461666666666667	2.89692598485328	0.0121885422993	20.4384	-0.30625	0.366805555555556	0.268190476190476	0.322338709677419	0.24	0.54625	NO	NO	NO	NO	NO	C	B	-0.386283170215834	1.55215048635731	0.0950663395353443	-2.67821225740048	0.257349536448698	2.32772146569936	0.373326115891706	-2.44684750782885	-1.93843365657314	2.77327859693582
AL4G18250	AT2G26100	OG0018464	.	protein_coding	Galactosyltransferase family protein	.	Galactosyltransferase family protein%3B FUNCTIONS IN: transferase activity%2C transferring hexosyl groups%2C transferase activity%2C transferring glycosyl groups%3B INVOLVED IN: protein amino acid glycosylation%3B LOCATED IN: chloroplast%2C membrane%3B CONTAINS InterPro DOMAIN/s: Glycosyl transferase%2C family 31 (InterPro:IPR002659)%3B BEST Arabidopsis thaliana protein match is: Galactosyltransf…	.	Galactosyltransferase family protein%3B FUNCTIONS IN: transferase activity%2C transferring hexosyl groups%2C transferase activity%2C transferring glycosyl groups%3B INVOLVED IN: protein amino acid glycosylation%3B LOCATED IN: chloroplast%2C membrane%3B CONTAINS InterPro DOMAIN/s: Glycosyl transferase%2C family 31 (InterPro:IPR002659)%3B BEST Arabidopsis thaliana protein match is: Galactosyltransf…	scaffold_4	5651527	5653867	2341	-	scaffold_4	5652341	5652555	215	*	0.175693372434042	-0.0548704373313734	254.223930450732	0.461666666666667	2.89692598485328	0.0121885422993	20.4384	-0.30625	0.366805555555556	0.268190476190476	0.322338709677419	0.24	0.54625	NO	NO	NO	NO	NO	B	B	-0.386283170215834	1.55215048635731	0.0950663395353443	-2.67821225740048	0.257349536448698	2.32772146569936	0.373326115891706	-2.44684750782885	-1.93843365657314	2.77327859693582
AL4G18250	AT2G26100	OG0018464	.	protein_coding	Galactosyltransferase family protein	.	Galactosyltransferase family protein%3B FUNCTIONS IN: transferase activity%2C transferring hexosyl groups%2C transferase activity%2C transferring glycosyl groups%3B INVOLVED IN: protein amino acid glycosylation%3B LOCATED IN: chloroplast%2C membrane%3B CONTAINS InterPro DOMAIN/s: Glycosyl transferase%2C family 31 (InterPro:IPR002659)%3B BEST Arabidopsis thaliana protein match is: Galactosyltransf…	.	Galactosyltransferase family protein%3B FUNCTIONS IN: transferase activity%2C transferring hexosyl groups%2C transferase activity%2C transferring glycosyl groups%3B INVOLVED IN: protein amino acid glycosylation%3B LOCATED IN: chloroplast%2C membrane%3B CONTAINS InterPro DOMAIN/s: Glycosyl transferase%2C family 31 (InterPro:IPR002659)%3B BEST Arabidopsis thaliana protein match is: Galactosyltransf…	scaffold_4	5651527	5653867	2341	-	scaffold_4	5652112	5652338	227	*	0.123329033303721	0.0242424268376813	233.129907730362	0.428819444444444	2.07789404500472	0.00990392223561	17.0801	-0.121805555555556	0.290694444444444	0.319238095238095	0.3325	0.284444444444444	0.40625	NO	NO	NO	NO	NO	C	B	0.717782907129814	1.42393808499089	0.11078597048213	-1.10303426432899	1.36141561379435	2.19950906433294	0.389045746838492	-0.871669514757357	-0.706155177861076	1.21382023481112
AL4G23770	AT2G29210	OG0007933	.	protein_coding	splicing factor PWI domain-containing protein	.	splicing factor PWI domain-containing protein%3B INVOLVED IN: R splicing%3B EXPRESSED IN: 23 plant structures%3B EXPRESSED DURING: 13 growth stages%3B CONTAINS InterPro DOMAIN/s: Splicing factor PWI (InterPro:IPR002483)%3B BEST Arabidopsis thaliana protein match is: Polynucleotidyl transferase%2C ribonuclease H-like superfamily protein (TAIR:AT3G12440.1)%3B Has 159601 Blast hits to 84623 proteins…	.	splicing factor PWI domain-containing protein%3B INVOLVED IN: R splicing%3B EXPRESSED IN: 23 plant structures%3B EXPRESSED DURING: 13 growth stages%3B CONTAINS InterPro DOMAIN/s: Splicing factor PWI (InterPro:IPR002483)%3B BEST Arabidopsis thaliana protein match is: Polynucleotidyl transferase%2C ribonuclease H-like superfamily protein (TAIR:AT3G12440.1)%3B Has 159601 Blast hits to 84623 proteins…	scaffold_4	13436651	13441312	4662	+	scaffold_4	13437910	13438245	336	*	0.190909499385898	0.051491165979602	187.789280366797	0.311527777777778	3.435985613044	0.011800727731	4.9705	0.206944444444444	0.291111111111111	0.349714285714286	0.062741935483871	0.284444444444444	0.0775	NO	NO	NO	NO	NO	C	B	1.7278618209681	-2.45926092235186	0.724600131261529	0.487506322953206	2.37149452763263	-1.68368994300981	1.00285990761789	0.718871072524839	4.18712274331996	0.237093808308323
AL4G23770	AT2G29210	OG0007933	.	protein_coding	splicing factor PWI domain-containing protein	.	splicing factor PWI domain-containing protein%3B INVOLVED IN: R splicing%3B EXPRESSED IN: 23 plant structures%3B EXPRESSED DURING: 13 growth stages%3B CONTAINS InterPro DOMAIN/s: Splicing factor PWI (InterPro:IPR002483)%3B BEST Arabidopsis thaliana protein match is: Polynucleotidyl transferase%2C ribonuclease H-like superfamily protein (TAIR:AT3G12440.1)%3B Has 159601 Blast hits to 84623 proteins…	.	splicing factor PWI domain-containing protein%3B INVOLVED IN: R splicing%3B EXPRESSED IN: 23 plant structures%3B EXPRESSED DURING: 13 growth stages%3B CONTAINS InterPro DOMAIN/s: Splicing factor PWI (InterPro:IPR002483)%3B BEST Arabidopsis thaliana protein match is: Polynucleotidyl transferase%2C ribonuclease H-like superfamily protein (TAIR:AT3G12440.1)%3B Has 159601 Blast hits to 84623 proteins…	scaffold_4	13436651	13441312	4662	+	scaffold_4	13437910	13438245	336	*	0.190909499385898	0.051491165979602	187.789280366797	0.311527777777778	3.435985613044	0.011800727731	4.9705	0.206944444444444	0.291111111111111	0.349714285714286	0.062741935483871	0.284444444444444	0.0775	NO	NO	NO	NO	NO	C	B	1.7278618209681	-2.45926092235186	0.724600131261529	0.487506322953206	2.37149452763263	-1.68368994300981	1.00285990761789	0.718871072524839	4.18712274331996	0.237093808308323
AL4G23770	AT2G29210	OG0007933	.	protein_coding	splicing factor PWI domain-containing protein	.	splicing factor PWI domain-containing protein%3B INVOLVED IN: R splicing%3B EXPRESSED IN: 23 plant structures%3B EXPRESSED DURING: 13 growth stages%3B CONTAINS InterPro DOMAIN/s: Splicing factor PWI (InterPro:IPR002483)%3B BEST Arabidopsis thaliana protein match is: Polynucleotidyl transferase%2C ribonuclease H-like superfamily protein (TAIR:AT3G12440.1)%3B Has 159601 Blast hits to 84623 proteins…	.	splicing factor PWI domain-containing protein%3B INVOLVED IN: R splicing%3B EXPRESSED IN: 23 plant structures%3B EXPRESSED DURING: 13 growth stages%3B CONTAINS InterPro DOMAIN/s: Splicing factor PWI (InterPro:IPR002483)%3B BEST Arabidopsis thaliana protein match is: Polynucleotidyl transferase%2C ribonuclease H-like superfamily protein (TAIR:AT3G12440.1)%3B Has 159601 Blast hits to 84623 proteins…	scaffold_4	13436651	13441312	4662	+	scaffold_4	13437910	13438245	336	*	0.190909499385898	0.051491165979602	187.789280366797	0.311527777777778	3.435985613044	0.011800727731	4.9705	0.206944444444444	0.291111111111111	0.349714285714286	0.062741935483871	0.284444444444444	0.0775	NO	NO	NO	NO	NO	C	B	1.7278618209681	-2.45926092235186	0.724600131261529	0.487506322953206	2.37149452763263	-1.68368994300981	1.00285990761789	0.718871072524839	4.18712274331996	0.237093808308323
AL4G24880	AT2G30105	OG0017130	.	protein_coding	LRR/ubiquitin-like domain protein	.	CONTAINS InterPro DOMAIN/s: Leucine-rich repeat%2C typical subtype (InterPro:IPR003591)%2C Leucine-rich repeat (InterPro:IPR001611)%2C Ubiquitin (InterPro:IPR000626)%2C Ubiquitin supergroup (InterPro:IPR019955)%3B BEST Arabidopsis thaliana protein match is: Leucine-rich repeat (LRR) family protein (TAIR:AT5G07910.1).	.	CONTAINS InterPro DOMAIN/s: Leucine-rich repeat%2C typical subtype (InterPro:IPR003591)%2C Leucine-rich repeat (InterPro:IPR001611)%2C Ubiquitin (InterPro:IPR000626)%2C Ubiquitin supergroup (InterPro:IPR019955)%3B BEST Arabidopsis thaliana protein match is: Leucine-rich repeat (LRR) family protein (TAIR:AT5G07910.1).	scaffold_4	13969579	13971794	2216	+	scaffold_4	13970972	13971118	147	*	0.170000610484658	0.00788218530549298	196.444172245179	0.319930555555556	2.3908663187506	0.0174001683609	3.0188	0.276666666666667	0.286666666666667	0.299111111111111	0.0761290322580645	0.316666666666667	0.04	NO	NO	NO	0.222222222222222	0	B	B	-0.705613051048097	-2.44016545831858	-0.304661418825866	0.403524141267987	-0.0619803443835654	-1.66459447897653	-0.0264016424695043	0.63488889083962	1.73455240727048	-0.708185560093853
AL4G24950	AT2G30130	OG0017127	ASL5	protein_coding	Lateral organ boundaries (LOB) domain family protein	.	ASL5%3B CONTAINS InterPro DOMAIN/s: Lateral organ boundaries%2C LOB (InterPro:IPR004883)%3B BEST Arabidopsis thaliana protein match is: LOB domain-containing protein 11 (TAIR:AT2G28500.1)%3B Has 1148 Blast hits to 1140 proteins in 32 species: Archae - 0%3B Bacteria - 0%3B Metazoa - 0%3B Fungi - 2%3B Plants - 1024%3B Viruses - 0%3B Other Eukaryotes - 122 (source: NCBI BLink).	Overexpression/activation tagged allele has epinastic leaves%2C reduced apical dominance and is sterile. Gene is similar to asymmetric leaves (AS)/lateral organ boundary (LOB) genes which repress KNOX gene expression.	ASL5%3B CONTAINS InterPro DOMAIN/s: Lateral organ boundaries%2C LOB (InterPro:IPR004883)%3B BEST Arabidopsis thaliana protein match is: LOB domain-containing protein 11 (TAIR:AT2G28500.1)%3B Has 1148 Blast hits to 1140 proteins in 32 species: Archae - 0%3B Bacteria - 0%3B Metazoa - 0%3B Fungi - 2%3B Plants - 1024%3B Viruses - 0%3B Other Eukaryotes - 122 (source: NCBI BLink).	scaffold_4	14024409	14025663	1255	+	scaffold_4	14023746	14024018	273	*	0.164548504029177	-0.0915763333110091	193.502200356069	0.341388888888889	2.7966703572655	0.00649120412595	9.5342	0.145138888888889	0.287638888888889	0.189079365079365	0.24008064516129	0.348888888888889	0.20375	NO	NO	NO	NO	NO	C	B	-1.56621840364574	-1.5153994144203	-0.846614409562801	0.34412211031991	-0.922585696981208	-0.739828435078249	-0.568354633206439	0.575486859891543	-0.05081898922544	-1.19073651988271
AL4G25170	AT2G30220	OG0000555	.	protein_coding	GDSL-like Lipase/Acylhydrolase family protein	.	GDSL-like Lipase/Acylhydrolase family protein%3B FUNCTIONS IN: hydrolase activity%2C acting on ester bonds%2C carboxylesterase activity%3B INVOLVED IN: lipid metabolic process%3B LOCATED IN: endomembrane system%3B CONTAINS InterPro DOMAIN/s: Lipase%2C GDSL (InterPro:IPR001087)%2C Esterase%2C SGNH hydrolase-type (InterPro:IPR013830)%3B BEST Arabidopsis thaliana protein match is: GDSL-like Lipase/A…	.	GDSL-like Lipase/Acylhydrolase family protein%3B FUNCTIONS IN: hydrolase activity%2C acting on ester bonds%2C carboxylesterase activity%3B INVOLVED IN: lipid metabolic process%3B LOCATED IN: endomembrane system%3B CONTAINS InterPro DOMAIN/s: Lipase%2C GDSL (InterPro:IPR001087)%2C Esterase%2C SGNH hydrolase-type (InterPro:IPR013830)%3B BEST Arabidopsis thaliana protein match is: GDSL-like Lipase/A…	scaffold_4	14120851	14122204	1354	+	scaffold_4	14121522	14121669	148	*	0.256613759080832	-0.134019248427675	279.46521388593	0.463402777777778	4.29613433324794	0.00137212993896	26.8545	-0.373611111111111	0.404444444444444	0.19847619047619	0.249354838709677	0.148888888888889	0.5225	NO	NO	NO	NO	NO	B	B	-0.79846783909154	-0.113246769689588	0.0651241853509842	-2.99468169814111	-0.154835132427008	0.662324209652463	0.343383961707346	-2.76331694856948	-0.685221069401952	3.05980588349209
AL4G25170	AT2G30220	OG0000555	.	protein_coding	GDSL-like Lipase/Acylhydrolase family protein	.	GDSL-like Lipase/Acylhydrolase family protein%3B FUNCTIONS IN: hydrolase activity%2C acting on ester bonds%2C carboxylesterase activity%3B INVOLVED IN: lipid metabolic process%3B LOCATED IN: endomembrane system%3B CONTAINS InterPro DOMAIN/s: Lipase%2C GDSL (InterPro:IPR001087)%2C Esterase%2C SGNH hydrolase-type (InterPro:IPR013830)%3B BEST Arabidopsis thaliana protein match is: GDSL-like Lipase/A…	.	GDSL-like Lipase/Acylhydrolase family protein%3B FUNCTIONS IN: hydrolase activity%2C acting on ester bonds%2C carboxylesterase activity%3B INVOLVED IN: lipid metabolic process%3B LOCATED IN: endomembrane system%3B CONTAINS InterPro DOMAIN/s: Lipase%2C GDSL (InterPro:IPR001087)%2C Esterase%2C SGNH hydrolase-type (InterPro:IPR013830)%3B BEST Arabidopsis thaliana protein match is: GDSL-like Lipase/A…	scaffold_4	14120851	14122204	1354	+	scaffold_4	14121522	14121669	148	*	0.256613759080832	-0.134019248427675	279.46521388593	0.463402777777778	4.29613433324794	0.00137212993896	26.8545	-0.373611111111111	0.404444444444444	0.19847619047619	0.249354838709677	0.148888888888889	0.5225	NO	NO	NO	NO	NO	B	B	-0.79846783909154	-0.113246769689588	0.0651241853509842	-2.99468169814111	-0.154835132427008	0.662324209652463	0.343383961707346	-2.76331694856948	-0.685221069401952	3.05980588349209
AL4G25170	AT2G30220	OG0000555	.	protein_coding	GDSL-like Lipase/Acylhydrolase family protein	.	GDSL-like Lipase/Acylhydrolase family protein%3B FUNCTIONS IN: hydrolase activity%2C acting on ester bonds%2C carboxylesterase activity%3B INVOLVED IN: lipid metabolic process%3B LOCATED IN: endomembrane system%3B CONTAINS InterPro DOMAIN/s: Lipase%2C GDSL (InterPro:IPR001087)%2C Esterase%2C SGNH hydrolase-type (InterPro:IPR013830)%3B BEST Arabidopsis thaliana protein match is: GDSL-like Lipase/A…	.	GDSL-like Lipase/Acylhydrolase family protein%3B FUNCTIONS IN: hydrolase activity%2C acting on ester bonds%2C carboxylesterase activity%3B INVOLVED IN: lipid metabolic process%3B LOCATED IN: endomembrane system%3B CONTAINS InterPro DOMAIN/s: Lipase%2C GDSL (InterPro:IPR001087)%2C Esterase%2C SGNH hydrolase-type (InterPro:IPR013830)%3B BEST Arabidopsis thaliana protein match is: GDSL-like Lipase/A…	scaffold_4	14120851	14122204	1354	+	scaffold_4	14121522	14121669	148	*	0.256613759080832	-0.134019248427675	279.46521388593	0.463402777777778	4.29613433324794	0.00137212993896	26.8545	-0.373611111111111	0.404444444444444	0.19847619047619	0.249354838709677	0.148888888888889	0.5225	NO	NO	NO	NO	NO	B	B	-0.79846783909154	-0.113246769689588	0.0651241853509842	-2.99468169814111	-0.154835132427008	0.662324209652463	0.343383961707346	-2.76331694856948	-0.685221069401952	3.05980588349209
AL4G25170	AT2G30220	OG0000555	.	protein_coding	GDSL-like Lipase/Acylhydrolase family protein	.	GDSL-like Lipase/Acylhydrolase family protein%3B FUNCTIONS IN: hydrolase activity%2C acting on ester bonds%2C carboxylesterase activity%3B INVOLVED IN: lipid metabolic process%3B LOCATED IN: endomembrane system%3B CONTAINS InterPro DOMAIN/s: Lipase%2C GDSL (InterPro:IPR001087)%2C Esterase%2C SGNH hydrolase-type (InterPro:IPR013830)%3B BEST Arabidopsis thaliana protein match is: GDSL-like Lipase/A…	.	GDSL-like Lipase/Acylhydrolase family protein%3B FUNCTIONS IN: hydrolase activity%2C acting on ester bonds%2C carboxylesterase activity%3B INVOLVED IN: lipid metabolic process%3B LOCATED IN: endomembrane system%3B CONTAINS InterPro DOMAIN/s: Lipase%2C GDSL (InterPro:IPR001087)%2C Esterase%2C SGNH hydrolase-type (InterPro:IPR013830)%3B BEST Arabidopsis thaliana protein match is: GDSL-like Lipase/A…	scaffold_4	14120851	14122204	1354	+	scaffold_4	14121522	14121669	148	*	0.256613759080832	-0.134019248427675	279.46521388593	0.463402777777778	4.29613433324794	0.00137212993896	26.8545	-0.373611111111111	0.404444444444444	0.19847619047619	0.249354838709677	0.148888888888889	0.5225	NO	NO	NO	NO	NO	B	B	-0.79846783909154	-0.113246769689588	0.0651241853509842	-2.99468169814111	-0.154835132427008	0.662324209652463	0.343383961707346	-2.76331694856948	-0.685221069401952	3.05980588349209
AL4G25170	AT2G30220	OG0000555	.	protein_coding	GDSL-like Lipase/Acylhydrolase family protein	.	GDSL-like Lipase/Acylhydrolase family protein%3B FUNCTIONS IN: hydrolase activity%2C acting on ester bonds%2C carboxylesterase activity%3B INVOLVED IN: lipid metabolic process%3B LOCATED IN: endomembrane system%3B CONTAINS InterPro DOMAIN/s: Lipase%2C GDSL (InterPro:IPR001087)%2C Esterase%2C SGNH hydrolase-type (InterPro:IPR013830)%3B BEST Arabidopsis thaliana protein match is: GDSL-like Lipase/A…	.	GDSL-like Lipase/Acylhydrolase family protein%3B FUNCTIONS IN: hydrolase activity%2C acting on ester bonds%2C carboxylesterase activity%3B INVOLVED IN: lipid metabolic process%3B LOCATED IN: endomembrane system%3B CONTAINS InterPro DOMAIN/s: Lipase%2C GDSL (InterPro:IPR001087)%2C Esterase%2C SGNH hydrolase-type (InterPro:IPR013830)%3B BEST Arabidopsis thaliana protein match is: GDSL-like Lipase/A…	scaffold_4	14120851	14122204	1354	+	scaffold_4	14121522	14121669	148	*	0.256613759080832	-0.134019248427675	279.46521388593	0.463402777777778	4.29613433324794	0.00137212993896	26.8545	-0.373611111111111	0.404444444444444	0.19847619047619	0.249354838709677	0.148888888888889	0.5225	NO	NO	NO	NO	NO	B	B	-0.79846783909154	-0.113246769689588	0.0651241853509842	-2.99468169814111	-0.154835132427008	0.662324209652463	0.343383961707346	-2.76331694856948	-0.685221069401952	3.05980588349209
AL4G25170	AT2G30220	OG0000555	.	protein_coding	GDSL-like Lipase/Acylhydrolase family protein	.	GDSL-like Lipase/Acylhydrolase family protein%3B FUNCTIONS IN: hydrolase activity%2C acting on ester bonds%2C carboxylesterase activity%3B INVOLVED IN: lipid metabolic process%3B LOCATED IN: endomembrane system%3B CONTAINS InterPro DOMAIN/s: Lipase%2C GDSL (InterPro:IPR001087)%2C Esterase%2C SGNH hydrolase-type (InterPro:IPR013830)%3B BEST Arabidopsis thaliana protein match is: GDSL-like Lipase/A…	.	GDSL-like Lipase/Acylhydrolase family protein%3B FUNCTIONS IN: hydrolase activity%2C acting on ester bonds%2C carboxylesterase activity%3B INVOLVED IN: lipid metabolic process%3B LOCATED IN: endomembrane system%3B CONTAINS InterPro DOMAIN/s: Lipase%2C GDSL (InterPro:IPR001087)%2C Esterase%2C SGNH hydrolase-type (InterPro:IPR013830)%3B BEST Arabidopsis thaliana protein match is: GDSL-like Lipase/A…	scaffold_4	14120851	14122204	1354	+	scaffold_4	14121522	14121669	148	*	0.256613759080832	-0.134019248427675	279.46521388593	0.463402777777778	4.29613433324794	0.00137212993896	26.8545	-0.373611111111111	0.404444444444444	0.19847619047619	0.249354838709677	0.148888888888889	0.5225	NO	NO	NO	NO	NO	B	B	-0.79846783909154	-0.113246769689588	0.0651241853509842	-2.99468169814111	-0.154835132427008	0.662324209652463	0.343383961707346	-2.76331694856948	-0.685221069401952	3.05980588349209
AL4G25170	AT2G30220	OG0000555	.	protein_coding	GDSL-like Lipase/Acylhydrolase family protein	.	GDSL-like Lipase/Acylhydrolase family protein%3B FUNCTIONS IN: hydrolase activity%2C acting on ester bonds%2C carboxylesterase activity%3B INVOLVED IN: lipid metabolic process%3B LOCATED IN: endomembrane system%3B CONTAINS InterPro DOMAIN/s: Lipase%2C GDSL (InterPro:IPR001087)%2C Esterase%2C SGNH hydrolase-type (InterPro:IPR013830)%3B BEST Arabidopsis thaliana protein match is: GDSL-like Lipase/A…	.	GDSL-like Lipase/Acylhydrolase family protein%3B FUNCTIONS IN: hydrolase activity%2C acting on ester bonds%2C carboxylesterase activity%3B INVOLVED IN: lipid metabolic process%3B LOCATED IN: endomembrane system%3B CONTAINS InterPro DOMAIN/s: Lipase%2C GDSL (InterPro:IPR001087)%2C Esterase%2C SGNH hydrolase-type (InterPro:IPR013830)%3B BEST Arabidopsis thaliana protein match is: GDSL-like Lipase/A…	scaffold_4	14120851	14122204	1354	+	scaffold_4	14121522	14121669	148	*	0.256613759080832	-0.134019248427675	279.46521388593	0.463402777777778	4.29613433324794	0.00137212993896	26.8545	-0.373611111111111	0.404444444444444	0.19847619047619	0.249354838709677	0.148888888888889	0.5225	NO	NO	NO	NO	NO	B	B	-0.79846783909154	-0.113246769689588	0.0651241853509842	-2.99468169814111	-0.154835132427008	0.662324209652463	0.343383961707346	-2.76331694856948	-0.685221069401952	3.05980588349209
AL4G25170	AT2G30220	OG0000555	.	protein_coding	GDSL-like Lipase/Acylhydrolase family protein	.	GDSL-like Lipase/Acylhydrolase family protein%3B FUNCTIONS IN: hydrolase activity%2C acting on ester bonds%2C carboxylesterase activity%3B INVOLVED IN: lipid metabolic process%3B LOCATED IN: endomembrane system%3B CONTAINS InterPro DOMAIN/s: Lipase%2C GDSL (InterPro:IPR001087)%2C Esterase%2C SGNH hydrolase-type (InterPro:IPR013830)%3B BEST Arabidopsis thaliana protein match is: GDSL-like Lipase/A…	.	GDSL-like Lipase/Acylhydrolase family protein%3B FUNCTIONS IN: hydrolase activity%2C acting on ester bonds%2C carboxylesterase activity%3B INVOLVED IN: lipid metabolic process%3B LOCATED IN: endomembrane system%3B CONTAINS InterPro DOMAIN/s: Lipase%2C GDSL (InterPro:IPR001087)%2C Esterase%2C SGNH hydrolase-type (InterPro:IPR013830)%3B BEST Arabidopsis thaliana protein match is: GDSL-like Lipase/A…	scaffold_4	14120851	14122204	1354	+	scaffold_4	14121522	14121669	148	*	0.256613759080832	-0.134019248427675	279.46521388593	0.463402777777778	4.29613433324794	0.00137212993896	26.8545	-0.373611111111111	0.404444444444444	0.19847619047619	0.249354838709677	0.148888888888889	0.5225	NO	MODERATE	NO	NO	NO	B	B	-0.79846783909154	-0.113246769689588	0.0651241853509842	-2.99468169814111	-0.154835132427008	0.662324209652463	0.343383961707346	-2.76331694856948	-0.685221069401952	3.05980588349209
AL4G25170	AT2G30220	OG0000555	.	protein_coding	GDSL-like Lipase/Acylhydrolase family protein	.	GDSL-like Lipase/Acylhydrolase family protein%3B FUNCTIONS IN: hydrolase activity%2C acting on ester bonds%2C carboxylesterase activity%3B INVOLVED IN: lipid metabolic process%3B LOCATED IN: endomembrane system%3B CONTAINS InterPro DOMAIN/s: Lipase%2C GDSL (InterPro:IPR001087)%2C Esterase%2C SGNH hydrolase-type (InterPro:IPR013830)%3B BEST Arabidopsis thaliana protein match is: GDSL-like Lipase/A…	.	GDSL-like Lipase/Acylhydrolase family protein%3B FUNCTIONS IN: hydrolase activity%2C acting on ester bonds%2C carboxylesterase activity%3B INVOLVED IN: lipid metabolic process%3B LOCATED IN: endomembrane system%3B CONTAINS InterPro DOMAIN/s: Lipase%2C GDSL (InterPro:IPR001087)%2C Esterase%2C SGNH hydrolase-type (InterPro:IPR013830)%3B BEST Arabidopsis thaliana protein match is: GDSL-like Lipase/A…	scaffold_4	14120851	14122204	1354	+	scaffold_4	14121522	14121669	148	*	0.256613759080832	-0.134019248427675	279.46521388593	0.463402777777778	4.29613433324794	0.00137212993896	26.8545	-0.373611111111111	0.404444444444444	0.19847619047619	0.249354838709677	0.148888888888889	0.5225	NO	NO	NO	NO	NO	B	B	-0.79846783909154	-0.113246769689588	0.0651241853509842	-2.99468169814111	-0.154835132427008	0.662324209652463	0.343383961707346	-2.76331694856948	-0.685221069401952	3.05980588349209
AL4G25170	AT2G30220	OG0000555	.	protein_coding	GDSL-like Lipase/Acylhydrolase family protein	.	GDSL-like Lipase/Acylhydrolase family protein%3B FUNCTIONS IN: hydrolase activity%2C acting on ester bonds%2C carboxylesterase activity%3B INVOLVED IN: lipid metabolic process%3B LOCATED IN: endomembrane system%3B CONTAINS InterPro DOMAIN/s: Lipase%2C GDSL (InterPro:IPR001087)%2C Esterase%2C SGNH hydrolase-type (InterPro:IPR013830)%3B BEST Arabidopsis thaliana protein match is: GDSL-like Lipase/A…	.	GDSL-like Lipase/Acylhydrolase family protein%3B FUNCTIONS IN: hydrolase activity%2C acting on ester bonds%2C carboxylesterase activity%3B INVOLVED IN: lipid metabolic process%3B LOCATED IN: endomembrane system%3B CONTAINS InterPro DOMAIN/s: Lipase%2C GDSL (InterPro:IPR001087)%2C Esterase%2C SGNH hydrolase-type (InterPro:IPR013830)%3B BEST Arabidopsis thaliana protein match is: GDSL-like Lipase/A…	scaffold_4	14120851	14122204	1354	+	scaffold_4	14121522	14121669	148	*	0.256613759080832	-0.134019248427675	279.46521388593	0.463402777777778	4.29613433324794	0.00137212993896	26.8545	-0.373611111111111	0.404444444444444	0.19847619047619	0.249354838709677	0.148888888888889	0.5225	NO	MODERATE	NO	NO	NO	B	B	-0.79846783909154	-0.113246769689588	0.0651241853509842	-2.99468169814111	-0.154835132427008	0.662324209652463	0.343383961707346	-2.76331694856948	-0.685221069401952	3.05980588349209
AL4G25170	AT2G30310	OG0000555	.	protein_coding	GDSL-like Lipase/Acylhydrolase family protein	.	GDSL-like Lipase/Acylhydrolase family protein%3B FUNCTIONS IN: hydrolase activity%2C acting on ester bonds%2C carboxylesterase activity%3B INVOLVED IN: lipid metabolic process%3B LOCATED IN: endomembrane system%3B EXPRESSED IN: pollen tube%3B CONTAINS InterPro DOMAIN/s: Lipase%2C GDSL (InterPro:IPR001087)%2C Esterase%2C SGNH hydrolase-type (InterPro:IPR013830)%3B BEST Arabidopsis thaliana protein…	.	GDSL-like Lipase/Acylhydrolase family protein%3B FUNCTIONS IN: hydrolase activity%2C acting on ester bonds%2C carboxylesterase activity%3B INVOLVED IN: lipid metabolic process%3B LOCATED IN: endomembrane system%3B EXPRESSED IN: pollen tube%3B CONTAINS InterPro DOMAIN/s: Lipase%2C GDSL (InterPro:IPR001087)%2C Esterase%2C SGNH hydrolase-type (InterPro:IPR013830)%3B BEST Arabidopsis thaliana protein…	scaffold_4	14120851	14122204	1354	+	scaffold_4	14121522	14121669	148	*	0.256613759080832	-0.134019248427675	279.46521388593	0.463402777777778	4.29613433324794	0.00137212993896	26.8545	-0.373611111111111	0.404444444444444	0.19847619047619	0.249354838709677	0.148888888888889	0.5225	NO	NO	NO	NO	NO	B	B	-0.79846783909154	-0.113246769689588	0.0651241853509842	-2.99468169814111	-0.154835132427008	0.662324209652463	0.343383961707346	-2.76331694856948	-0.685221069401952	3.05980588349209
AL4G25170	AT2G30310	OG0000555	.	protein_coding	GDSL-like Lipase/Acylhydrolase family protein	.	GDSL-like Lipase/Acylhydrolase family protein%3B FUNCTIONS IN: hydrolase activity%2C acting on ester bonds%2C carboxylesterase activity%3B INVOLVED IN: lipid metabolic process%3B LOCATED IN: endomembrane system%3B EXPRESSED IN: pollen tube%3B CONTAINS InterPro DOMAIN/s: Lipase%2C GDSL (InterPro:IPR001087)%2C Esterase%2C SGNH hydrolase-type (InterPro:IPR013830)%3B BEST Arabidopsis thaliana protein…	.	GDSL-like Lipase/Acylhydrolase family protein%3B FUNCTIONS IN: hydrolase activity%2C acting on ester bonds%2C carboxylesterase activity%3B INVOLVED IN: lipid metabolic process%3B LOCATED IN: endomembrane system%3B EXPRESSED IN: pollen tube%3B CONTAINS InterPro DOMAIN/s: Lipase%2C GDSL (InterPro:IPR001087)%2C Esterase%2C SGNH hydrolase-type (InterPro:IPR013830)%3B BEST Arabidopsis thaliana protein…	scaffold_4	14120851	14122204	1354	+	scaffold_4	14121522	14121669	148	*	0.256613759080832	-0.134019248427675	279.46521388593	0.463402777777778	4.29613433324794	0.00137212993896	26.8545	-0.373611111111111	0.404444444444444	0.19847619047619	0.249354838709677	0.148888888888889	0.5225	NO	NO	NO	NO	NO	B	B	-0.79846783909154	-0.113246769689588	0.0651241853509842	-2.99468169814111	-0.154835132427008	0.662324209652463	0.343383961707346	-2.76331694856948	-0.685221069401952	3.05980588349209
AL4G25170	AT2G30310	OG0000555	.	protein_coding	GDSL-like Lipase/Acylhydrolase family protein	.	GDSL-like Lipase/Acylhydrolase family protein%3B FUNCTIONS IN: hydrolase activity%2C acting on ester bonds%2C carboxylesterase activity%3B INVOLVED IN: lipid metabolic process%3B LOCATED IN: endomembrane system%3B EXPRESSED IN: pollen tube%3B CONTAINS InterPro DOMAIN/s: Lipase%2C GDSL (InterPro:IPR001087)%2C Esterase%2C SGNH hydrolase-type (InterPro:IPR013830)%3B BEST Arabidopsis thaliana protein…	.	GDSL-like Lipase/Acylhydrolase family protein%3B FUNCTIONS IN: hydrolase activity%2C acting on ester bonds%2C carboxylesterase activity%3B INVOLVED IN: lipid metabolic process%3B LOCATED IN: endomembrane system%3B EXPRESSED IN: pollen tube%3B CONTAINS InterPro DOMAIN/s: Lipase%2C GDSL (InterPro:IPR001087)%2C Esterase%2C SGNH hydrolase-type (InterPro:IPR013830)%3B BEST Arabidopsis thaliana protein…	scaffold_4	14120851	14122204	1354	+	scaffold_4	14121522	14121669	148	*	0.256613759080832	-0.134019248427675	279.46521388593	0.463402777777778	4.29613433324794	0.00137212993896	26.8545	-0.373611111111111	0.404444444444444	0.19847619047619	0.249354838709677	0.148888888888889	0.5225	NO	NO	NO	NO	NO	B	B	-0.79846783909154	-0.113246769689588	0.0651241853509842	-2.99468169814111	-0.154835132427008	0.662324209652463	0.343383961707346	-2.76331694856948	-0.685221069401952	3.05980588349209
AL4G25170	AT2G30310	OG0000555	.	protein_coding	GDSL-like Lipase/Acylhydrolase family protein	.	GDSL-like Lipase/Acylhydrolase family protein%3B FUNCTIONS IN: hydrolase activity%2C acting on ester bonds%2C carboxylesterase activity%3B INVOLVED IN: lipid metabolic process%3B LOCATED IN: endomembrane system%3B EXPRESSED IN: pollen tube%3B CONTAINS InterPro DOMAIN/s: Lipase%2C GDSL (InterPro:IPR001087)%2C Esterase%2C SGNH hydrolase-type (InterPro:IPR013830)%3B BEST Arabidopsis thaliana protein…	.	GDSL-like Lipase/Acylhydrolase family protein%3B FUNCTIONS IN: hydrolase activity%2C acting on ester bonds%2C carboxylesterase activity%3B INVOLVED IN: lipid metabolic process%3B LOCATED IN: endomembrane system%3B EXPRESSED IN: pollen tube%3B CONTAINS InterPro DOMAIN/s: Lipase%2C GDSL (InterPro:IPR001087)%2C Esterase%2C SGNH hydrolase-type (InterPro:IPR013830)%3B BEST Arabidopsis thaliana protein…	scaffold_4	14120851	14122204	1354	+	scaffold_4	14121522	14121669	148	*	0.256613759080832	-0.134019248427675	279.46521388593	0.463402777777778	4.29613433324794	0.00137212993896	26.8545	-0.373611111111111	0.404444444444444	0.19847619047619	0.249354838709677	0.148888888888889	0.5225	NO	NO	NO	NO	NO	B	B	-0.79846783909154	-0.113246769689588	0.0651241853509842	-2.99468169814111	-0.154835132427008	0.662324209652463	0.343383961707346	-2.76331694856948	-0.685221069401952	3.05980588349209
AL4G25170	AT2G30310	OG0000555	.	protein_coding	GDSL-like Lipase/Acylhydrolase family protein	.	GDSL-like Lipase/Acylhydrolase family protein%3B FUNCTIONS IN: hydrolase activity%2C acting on ester bonds%2C carboxylesterase activity%3B INVOLVED IN: lipid metabolic process%3B LOCATED IN: endomembrane system%3B EXPRESSED IN: pollen tube%3B CONTAINS InterPro DOMAIN/s: Lipase%2C GDSL (InterPro:IPR001087)%2C Esterase%2C SGNH hydrolase-type (InterPro:IPR013830)%3B BEST Arabidopsis thaliana protein…	.	GDSL-like Lipase/Acylhydrolase family protein%3B FUNCTIONS IN: hydrolase activity%2C acting on ester bonds%2C carboxylesterase activity%3B INVOLVED IN: lipid metabolic process%3B LOCATED IN: endomembrane system%3B EXPRESSED IN: pollen tube%3B CONTAINS InterPro DOMAIN/s: Lipase%2C GDSL (InterPro:IPR001087)%2C Esterase%2C SGNH hydrolase-type (InterPro:IPR013830)%3B BEST Arabidopsis thaliana protein…	scaffold_4	14120851	14122204	1354	+	scaffold_4	14121522	14121669	148	*	0.256613759080832	-0.134019248427675	279.46521388593	0.463402777777778	4.29613433324794	0.00137212993896	26.8545	-0.373611111111111	0.404444444444444	0.19847619047619	0.249354838709677	0.148888888888889	0.5225	NO	NO	NO	NO	NO	B	B	-0.79846783909154	-0.113246769689588	0.0651241853509842	-2.99468169814111	-0.154835132427008	0.662324209652463	0.343383961707346	-2.76331694856948	-0.685221069401952	3.05980588349209
AL4G25170	AT2G30310	OG0000555	.	protein_coding	GDSL-like Lipase/Acylhydrolase family protein	.	GDSL-like Lipase/Acylhydrolase family protein%3B FUNCTIONS IN: hydrolase activity%2C acting on ester bonds%2C carboxylesterase activity%3B INVOLVED IN: lipid metabolic process%3B LOCATED IN: endomembrane system%3B EXPRESSED IN: pollen tube%3B CONTAINS InterPro DOMAIN/s: Lipase%2C GDSL (InterPro:IPR001087)%2C Esterase%2C SGNH hydrolase-type (InterPro:IPR013830)%3B BEST Arabidopsis thaliana protein…	.	GDSL-like Lipase/Acylhydrolase family protein%3B FUNCTIONS IN: hydrolase activity%2C acting on ester bonds%2C carboxylesterase activity%3B INVOLVED IN: lipid metabolic process%3B LOCATED IN: endomembrane system%3B EXPRESSED IN: pollen tube%3B CONTAINS InterPro DOMAIN/s: Lipase%2C GDSL (InterPro:IPR001087)%2C Esterase%2C SGNH hydrolase-type (InterPro:IPR013830)%3B BEST Arabidopsis thaliana protein…	scaffold_4	14120851	14122204	1354	+	scaffold_4	14121522	14121669	148	*	0.256613759080832	-0.134019248427675	279.46521388593	0.463402777777778	4.29613433324794	0.00137212993896	26.8545	-0.373611111111111	0.404444444444444	0.19847619047619	0.249354838709677	0.148888888888889	0.5225	NO	NO	NO	NO	NO	B	B	-0.79846783909154	-0.113246769689588	0.0651241853509842	-2.99468169814111	-0.154835132427008	0.662324209652463	0.343383961707346	-2.76331694856948	-0.685221069401952	3.05980588349209
AL4G25170	AT2G30310	OG0000555	.	protein_coding	GDSL-like Lipase/Acylhydrolase family protein	.	GDSL-like Lipase/Acylhydrolase family protein%3B FUNCTIONS IN: hydrolase activity%2C acting on ester bonds%2C carboxylesterase activity%3B INVOLVED IN: lipid metabolic process%3B LOCATED IN: endomembrane system%3B EXPRESSED IN: pollen tube%3B CONTAINS InterPro DOMAIN/s: Lipase%2C GDSL (InterPro:IPR001087)%2C Esterase%2C SGNH hydrolase-type (InterPro:IPR013830)%3B BEST Arabidopsis thaliana protein…	.	GDSL-like Lipase/Acylhydrolase family protein%3B FUNCTIONS IN: hydrolase activity%2C acting on ester bonds%2C carboxylesterase activity%3B INVOLVED IN: lipid metabolic process%3B LOCATED IN: endomembrane system%3B EXPRESSED IN: pollen tube%3B CONTAINS InterPro DOMAIN/s: Lipase%2C GDSL (InterPro:IPR001087)%2C Esterase%2C SGNH hydrolase-type (InterPro:IPR013830)%3B BEST Arabidopsis thaliana protein…	scaffold_4	14120851	14122204	1354	+	scaffold_4	14121522	14121669	148	*	0.256613759080832	-0.134019248427675	279.46521388593	0.463402777777778	4.29613433324794	0.00137212993896	26.8545	-0.373611111111111	0.404444444444444	0.19847619047619	0.249354838709677	0.148888888888889	0.5225	NO	NO	NO	NO	NO	B	B	-0.79846783909154	-0.113246769689588	0.0651241853509842	-2.99468169814111	-0.154835132427008	0.662324209652463	0.343383961707346	-2.76331694856948	-0.685221069401952	3.05980588349209
AL4G25170	AT2G30310	OG0000555	.	protein_coding	GDSL-like Lipase/Acylhydrolase family protein	.	GDSL-like Lipase/Acylhydrolase family protein%3B FUNCTIONS IN: hydrolase activity%2C acting on ester bonds%2C carboxylesterase activity%3B INVOLVED IN: lipid metabolic process%3B LOCATED IN: endomembrane system%3B EXPRESSED IN: pollen tube%3B CONTAINS InterPro DOMAIN/s: Lipase%2C GDSL (InterPro:IPR001087)%2C Esterase%2C SGNH hydrolase-type (InterPro:IPR013830)%3B BEST Arabidopsis thaliana protein…	.	GDSL-like Lipase/Acylhydrolase family protein%3B FUNCTIONS IN: hydrolase activity%2C acting on ester bonds%2C carboxylesterase activity%3B INVOLVED IN: lipid metabolic process%3B LOCATED IN: endomembrane system%3B EXPRESSED IN: pollen tube%3B CONTAINS InterPro DOMAIN/s: Lipase%2C GDSL (InterPro:IPR001087)%2C Esterase%2C SGNH hydrolase-type (InterPro:IPR013830)%3B BEST Arabidopsis thaliana protein…	scaffold_4	14120851	14122204	1354	+	scaffold_4	14121522	14121669	148	*	0.256613759080832	-0.134019248427675	279.46521388593	0.463402777777778	4.29613433324794	0.00137212993896	26.8545	-0.373611111111111	0.404444444444444	0.19847619047619	0.249354838709677	0.148888888888889	0.5225	NO	MODERATE	NO	NO	NO	B	B	-0.79846783909154	-0.113246769689588	0.0651241853509842	-2.99468169814111	-0.154835132427008	0.662324209652463	0.343383961707346	-2.76331694856948	-0.685221069401952	3.05980588349209
AL4G25170	AT2G30310	OG0000555	.	protein_coding	GDSL-like Lipase/Acylhydrolase family protein	.	GDSL-like Lipase/Acylhydrolase family protein%3B FUNCTIONS IN: hydrolase activity%2C acting on ester bonds%2C carboxylesterase activity%3B INVOLVED IN: lipid metabolic process%3B LOCATED IN: endomembrane system%3B EXPRESSED IN: pollen tube%3B CONTAINS InterPro DOMAIN/s: Lipase%2C GDSL (InterPro:IPR001087)%2C Esterase%2C SGNH hydrolase-type (InterPro:IPR013830)%3B BEST Arabidopsis thaliana protein…	.	GDSL-like Lipase/Acylhydrolase family protein%3B FUNCTIONS IN: hydrolase activity%2C acting on ester bonds%2C carboxylesterase activity%3B INVOLVED IN: lipid metabolic process%3B LOCATED IN: endomembrane system%3B EXPRESSED IN: pollen tube%3B CONTAINS InterPro DOMAIN/s: Lipase%2C GDSL (InterPro:IPR001087)%2C Esterase%2C SGNH hydrolase-type (InterPro:IPR013830)%3B BEST Arabidopsis thaliana protein…	scaffold_4	14120851	14122204	1354	+	scaffold_4	14121522	14121669	148	*	0.256613759080832	-0.134019248427675	279.46521388593	0.463402777777778	4.29613433324794	0.00137212993896	26.8545	-0.373611111111111	0.404444444444444	0.19847619047619	0.249354838709677	0.148888888888889	0.5225	NO	NO	NO	NO	NO	B	B	-0.79846783909154	-0.113246769689588	0.0651241853509842	-2.99468169814111	-0.154835132427008	0.662324209652463	0.343383961707346	-2.76331694856948	-0.685221069401952	3.05980588349209
AL4G25170	AT2G30310	OG0000555	.	protein_coding	GDSL-like Lipase/Acylhydrolase family protein	.	GDSL-like Lipase/Acylhydrolase family protein%3B FUNCTIONS IN: hydrolase activity%2C acting on ester bonds%2C carboxylesterase activity%3B INVOLVED IN: lipid metabolic process%3B LOCATED IN: endomembrane system%3B EXPRESSED IN: pollen tube%3B CONTAINS InterPro DOMAIN/s: Lipase%2C GDSL (InterPro:IPR001087)%2C Esterase%2C SGNH hydrolase-type (InterPro:IPR013830)%3B BEST Arabidopsis thaliana protein…	.	GDSL-like Lipase/Acylhydrolase family protein%3B FUNCTIONS IN: hydrolase activity%2C acting on ester bonds%2C carboxylesterase activity%3B INVOLVED IN: lipid metabolic process%3B LOCATED IN: endomembrane system%3B EXPRESSED IN: pollen tube%3B CONTAINS InterPro DOMAIN/s: Lipase%2C GDSL (InterPro:IPR001087)%2C Esterase%2C SGNH hydrolase-type (InterPro:IPR013830)%3B BEST Arabidopsis thaliana protein…	scaffold_4	14120851	14122204	1354	+	scaffold_4	14121522	14121669	148	*	0.256613759080832	-0.134019248427675	279.46521388593	0.463402777777778	4.29613433324794	0.00137212993896	26.8545	-0.373611111111111	0.404444444444444	0.19847619047619	0.249354838709677	0.148888888888889	0.5225	NO	MODERATE	NO	NO	NO	B	B	-0.79846783909154	-0.113246769689588	0.0651241853509842	-2.99468169814111	-0.154835132427008	0.662324209652463	0.343383961707346	-2.76331694856948	-0.685221069401952	3.05980588349209
AL4G27310	AT1G05570	OG0000920	CALS1	protein_coding	callose synthase 1	callose synthase 1	callose synthase 1 (CALS1)%3B FUNCTIONS IN: transferase activity%2C transferring glycosyl groups%2C 1%2C3-beta-glucan synthase activity%3B INVOLVED IN: 1%2C3-beta-glucan biosynthetic process%3B LOCATED IN: 1%2C3-beta-glucan synthase complex%2C plasma membrane%2C cell plate%3B EXPRESSED IN: 23 plant structures%3B EXPRESSED DURING: 13 growth stages%3B CONTAINS InterPro DOMAIN/s: Glycosyl transferas…	Encodes a callose synthase 1 catalytic subunit . Member of Glycosyltransferase Family- 48.	callose synthase 1 (CALS1)%3B FUNCTIONS IN: transferase activity%2C transferring glycosyl groups%2C 1%2C3-beta-glucan synthase activity%3B INVOLVED IN: 1%2C3-beta-glucan biosynthetic process%3B LOCATED IN: 1%2C3-beta-glucan synthase complex%2C plasma membrane%2C cell plate%3B EXPRESSED IN: 23 plant structures%3B EXPRESSED DURING: 13 growth stages%3B CONTAINS InterPro DOMAIN/s: Glycosyl transferas…	scaffold_4	15085072	15096962	11891	+	scaffold_4	15089447	15090098	652	*	0.148314589315534	-0.0314439337415094	152.015050175131	0.230277777777778	3.36288685989984	0.00337475008923	7.8497	0.00430555555555555	0.22125	0.223746031746032	0.0771774193548387	0.295555555555556	0.29125	NO	NO	NO	NO	NO	C	B	-1.1019444634286	-2.68567856731811	-1.59067694104416	0.383040682320374	-0.458311756764068	-1.91010758797606	-1.3124171646878	0.614405431892007	1.58373410388951	-1.97371762336453
AL4G27310	AT1G05570	OG0000920	CALS1	protein_coding	callose synthase 1	callose synthase 1	callose synthase 1 (CALS1)%3B FUNCTIONS IN: transferase activity%2C transferring glycosyl groups%2C 1%2C3-beta-glucan synthase activity%3B INVOLVED IN: 1%2C3-beta-glucan biosynthetic process%3B LOCATED IN: 1%2C3-beta-glucan synthase complex%2C plasma membrane%2C cell plate%3B EXPRESSED IN: 23 plant structures%3B EXPRESSED DURING: 13 growth stages%3B CONTAINS InterPro DOMAIN/s: Glycosyl transferas…	Encodes a callose synthase 1 catalytic subunit . Member of Glycosyltransferase Family- 48.	callose synthase 1 (CALS1)%3B FUNCTIONS IN: transferase activity%2C transferring glycosyl groups%2C 1%2C3-beta-glucan synthase activity%3B INVOLVED IN: 1%2C3-beta-glucan biosynthetic process%3B LOCATED IN: 1%2C3-beta-glucan synthase complex%2C plasma membrane%2C cell plate%3B EXPRESSED IN: 23 plant structures%3B EXPRESSED DURING: 13 growth stages%3B CONTAINS InterPro DOMAIN/s: Glycosyl transferas…	scaffold_4	15085072	15096962	11891	+	scaffold_4	15089447	15090098	652	*	0.148314589315534	-0.0314439337415094	152.015050175131	0.230277777777778	3.36288685989984	0.00337475008923	7.8497	0.00430555555555555	0.22125	0.223746031746032	0.0771774193548387	0.295555555555556	0.29125	NO	NO	NO	NO	NO	B	B	-1.1019444634286	-2.68567856731811	-1.59067694104416	0.383040682320374	-0.458311756764068	-1.91010758797606	-1.3124171646878	0.614405431892007	1.58373410388951	-1.97371762336453
AL4G27310	AT2G31960	OG0000920	GSL03	protein_coding	glucan synthase-like 3	glucan synthase-like 3	glucan synthase-like 3 (GSL03)%3B FUNCTIONS IN: transferase activity%2C transferring glycosyl groups%2C 1%2C3-beta-glucan synthase activity%3B INVOLVED IN: 1%2C3-beta-glucan biosynthetic process%3B LOCATED IN: 1%2C3-beta-glucan synthase complex%2C plasma membrane%3B EXPRESSED IN: 24 plant structures%3B EXPRESSED DURING: 14 growth stages%3B CONTAINS InterPro DOMAIN/s: Glycosyl transferase%2C famil…	encodes a protein similar to callose synthase	glucan synthase-like 3 (GSL03)%3B FUNCTIONS IN: transferase activity%2C transferring glycosyl groups%2C 1%2C3-beta-glucan synthase activity%3B INVOLVED IN: 1%2C3-beta-glucan biosynthetic process%3B LOCATED IN: 1%2C3-beta-glucan synthase complex%2C plasma membrane%3B EXPRESSED IN: 24 plant structures%3B EXPRESSED DURING: 14 growth stages%3B CONTAINS InterPro DOMAIN/s: Glycosyl transferase%2C famil…	scaffold_4	15085072	15096962	11891	+	scaffold_4	15089447	15090098	652	*	0.148314589315534	-0.0314439337415094	152.015050175131	0.230277777777778	3.36288685989984	0.00337475008923	7.8497	0.00430555555555555	0.22125	0.223746031746032	0.0771774193548387	0.295555555555556	0.29125	NO	NO	NO	NO	NO	C	B	-1.1019444634286	-2.68567856731811	-1.59067694104416	0.383040682320374	-0.458311756764068	-1.91010758797606	-1.3124171646878	0.614405431892007	1.58373410388951	-1.97371762336453
AL4G27310	AT2G31960	OG0000920	GSL03	protein_coding	glucan synthase-like 3	glucan synthase-like 3	glucan synthase-like 3 (GSL03)%3B FUNCTIONS IN: transferase activity%2C transferring glycosyl groups%2C 1%2C3-beta-glucan synthase activity%3B INVOLVED IN: 1%2C3-beta-glucan biosynthetic process%3B LOCATED IN: 1%2C3-beta-glucan synthase complex%2C plasma membrane%3B EXPRESSED IN: 24 plant structures%3B EXPRESSED DURING: 14 growth stages%3B CONTAINS InterPro DOMAIN/s: Glycosyl transferase%2C famil…	encodes a protein similar to callose synthase	glucan synthase-like 3 (GSL03)%3B FUNCTIONS IN: transferase activity%2C transferring glycosyl groups%2C 1%2C3-beta-glucan synthase activity%3B INVOLVED IN: 1%2C3-beta-glucan biosynthetic process%3B LOCATED IN: 1%2C3-beta-glucan synthase complex%2C plasma membrane%3B EXPRESSED IN: 24 plant structures%3B EXPRESSED DURING: 14 growth stages%3B CONTAINS InterPro DOMAIN/s: Glycosyl transferase%2C famil…	scaffold_4	15085072	15096962	11891	+	scaffold_4	15089447	15090098	652	*	0.148314589315534	-0.0314439337415094	152.015050175131	0.230277777777778	3.36288685989984	0.00337475008923	7.8497	0.00430555555555555	0.22125	0.223746031746032	0.0771774193548387	0.295555555555556	0.29125	NO	NO	NO	NO	NO	B	B	-1.1019444634286	-2.68567856731811	-1.59067694104416	0.383040682320374	-0.458311756764068	-1.91010758797606	-1.3124171646878	0.614405431892007	1.58373410388951	-1.97371762336453
AL4G27320	AT2G31970	OG0008493	RAD50	protein_coding	D repair-recombination protein (RAD50)	.	RAD50%3B FUNCTIONS IN: zinc ion binding%2C ATP binding%2C nuclease activity%3B INVOLVED IN: D repair%2C double-strand break repair%2C telomere capping%2C mitotic recombination%2C telomere maintenance%3B LOCATED IN: nucleus%2C Mre11 complex%2C cytoplasm%3B EXPRESSED IN: 23 plant structures%3B EXPRESSED DURING: 14 growth stages%3B CONTAINS InterPro DOMAIN/s: Zinc hook%2C Rad50 (InterPro:IPR013134)%…	Encodes the Arabidopsis RAD50 homologue. It is involved in double strand break repair. Component of the meiotic recombination complex that processes meiotic double-strand-breaks to produce single-stranded D ends%2C which act in the homology search and recombination. Accumulates in the nucleus during meiotic prophase%2C a process regulated by PHS1.	RAD50%3B FUNCTIONS IN: zinc ion binding%2C ATP binding%2C nuclease activity%3B INVOLVED IN: D repair%2C double-strand break repair%2C telomere capping%2C mitotic recombination%2C telomere maintenance%3B LOCATED IN: nucleus%2C Mre11 complex%2C cytoplasm%3B EXPRESSED IN: 23 plant structures%3B EXPRESSED DURING: 14 growth stages%3B CONTAINS InterPro DOMAIN/s: Zinc hook%2C Rad50 (InterPro:IPR013134)%…	scaffold_4	15098602	15106976	8375	+	scaffold_4	15100548	15101052	505	*	0.165244179975236	-0.112047061948713	227.785718905456	0.389861111111111	2.74438241588273	0.00670700074643	8.5469	-0.0408333333333333	0.306944444444444	0.17568253968254	0.332258064516129	0.376666666666667	0.4175	NO	NO	NO	0.0277777777777778	0	C	B	-1.08948833332521	-0.207360128139408	-3.59006428670484	-3.83552768794064	-0.445855626660678	0.568210851202643	-3.31180451034848	-3.60416293836901	-0.882128205185802	0.2454634012358
AL4G27320	AT2G31970	OG0008493	RAD50	protein_coding	D repair-recombination protein (RAD50)	.	RAD50%3B FUNCTIONS IN: zinc ion binding%2C ATP binding%2C nuclease activity%3B INVOLVED IN: D repair%2C double-strand break repair%2C telomere capping%2C mitotic recombination%2C telomere maintenance%3B LOCATED IN: nucleus%2C Mre11 complex%2C cytoplasm%3B EXPRESSED IN: 23 plant structures%3B EXPRESSED DURING: 14 growth stages%3B CONTAINS InterPro DOMAIN/s: Zinc hook%2C Rad50 (InterPro:IPR013134)%…	Encodes the Arabidopsis RAD50 homologue. It is involved in double strand break repair. Component of the meiotic recombination complex that processes meiotic double-strand-breaks to produce single-stranded D ends%2C which act in the homology search and recombination. Accumulates in the nucleus during meiotic prophase%2C a process regulated by PHS1.	RAD50%3B FUNCTIONS IN: zinc ion binding%2C ATP binding%2C nuclease activity%3B INVOLVED IN: D repair%2C double-strand break repair%2C telomere capping%2C mitotic recombination%2C telomere maintenance%3B LOCATED IN: nucleus%2C Mre11 complex%2C cytoplasm%3B EXPRESSED IN: 23 plant structures%3B EXPRESSED DURING: 14 growth stages%3B CONTAINS InterPro DOMAIN/s: Zinc hook%2C Rad50 (InterPro:IPR013134)%…	scaffold_4	15098602	15106976	8375	+	scaffold_4	15100548	15101052	505	*	0.165244179975236	-0.112047061948713	227.785718905456	0.389861111111111	2.74438241588273	0.00670700074643	8.5469	-0.0408333333333333	0.306944444444444	0.17568253968254	0.332258064516129	0.376666666666667	0.4175	NO	NO	NO	0.0277777777777778	0	C	B	-1.08948833332521	-0.207360128139408	-3.59006428670484	-3.83552768794064	-0.445855626660678	0.568210851202643	-3.31180451034848	-3.60416293836901	-0.882128205185802	0.2454634012358
AL4G30530	AT2G34560	OG0005760	CCP1	protein_coding	P-loop containing nucleoside triphosphate hydrolases superfamily protein	conserved in ciliated species and in the land plants 1	P-loop containing nucleoside triphosphate hydrolases superfamily protein%3B FUNCTIONS IN: nucleoside-triphosphatase activity%2C ATPase activity%2C nucleotide binding%2C ATP binding%3B INVOLVED IN: protein metabolic process%3B EXPRESSED IN: 22 plant structures%3B EXPRESSED DURING: 13 growth stages%3B CONTAINS InterPro DOMAIN/s: ATPase%2C AAA-type%2C core (InterPro:IPR003959)%2C ATPase%2C AAA+ type…	.	P-loop containing nucleoside triphosphate hydrolases superfamily protein%3B FUNCTIONS IN: nucleoside-triphosphatase activity%2C ATPase activity%2C nucleotide binding%2C ATP binding%3B INVOLVED IN: protein metabolic process%3B EXPRESSED IN: 22 plant structures%3B EXPRESSED DURING: 13 growth stages%3B CONTAINS InterPro DOMAIN/s: ATPase%2C AAA-type%2C core (InterPro:IPR003959)%2C ATPase%2C AAA+ type…	scaffold_4	16368858	16371532	2675	+	scaffold_4	16369995	16370253	259	*	0.187029066901255	-0.098865125129711	258.414934695659	0.442083333333333	3.13729721048911	0.00670700074643	14.6908	-0.0263888888888889	0.354722222222222	0.213460317460317	0.379354838709677	0.351111111111111	0.3775	NO	NO	NO	NO	NO	C	A	-0.125836813508649	1.10613500500815	-0.271725049223073	0.608358730744122	0.517795893155883	1.8817059843502	0.00653472713328868	0.839723480315755	-1.2319718185168	-0.880083779967195
AL4G31370	AT2G35340	OG0000458	MEE29	protein_coding	helicase domain-containing protein	maternal effect embryo arrest 29	maternal effect embryo arrest 29 (MEE29)%3B FUNCTIONS IN: helicase activity%2C ATP-dependent R helicase activity%2C ATP binding%2C ATP-dependent helicase activity%2C nucleic acid binding%3B INVOLVED IN: embryo development ending in seed dormancy%3B LOCATED IN: endomembrane system%3B EXPRESSED IN: 22 plant structures%3B EXPRESSED DURING: 13 growth stages%3B CONTAINS InterPro DOMAIN/s: Helicase-ass…	.	maternal effect embryo arrest 29 (MEE29)%3B FUNCTIONS IN: helicase activity%2C ATP-dependent R helicase activity%2C ATP binding%2C ATP-dependent helicase activity%2C nucleic acid binding%3B INVOLVED IN: embryo development ending in seed dormancy%3B LOCATED IN: endomembrane system%3B EXPRESSED IN: 22 plant structures%3B EXPRESSED DURING: 13 growth stages%3B CONTAINS InterPro DOMAIN/s: Helicase-ass…	scaffold_4	16770287	16777586	7300	+	scaffold_4	16771819	16772230	412	*	0.133772744253559	-0.0337026140761163	253.436685202072	0.432361111111111	1.65029388695932	0.0138753078716	3.4284	0.172361111111111	0.307083333333333	0.262793650793651	0.39008064516129	0.481111111111111	0.30875	NO	NO	NO	NO	NO	C	A	-0.927558641981181	2.33233658828919	-3.22701566721947	0.595044482428176	-0.283925935316649	3.10790756763124	-2.94875589086311	0.826409231999809	-3.25989523027037	-3.82206014964765
AL4G31370	AT2G35340	OG0000458	MEE29	protein_coding	helicase domain-containing protein	maternal effect embryo arrest 29	maternal effect embryo arrest 29 (MEE29)%3B FUNCTIONS IN: helicase activity%2C ATP-dependent R helicase activity%2C ATP binding%2C ATP-dependent helicase activity%2C nucleic acid binding%3B INVOLVED IN: embryo development ending in seed dormancy%3B LOCATED IN: endomembrane system%3B EXPRESSED IN: 22 plant structures%3B EXPRESSED DURING: 13 growth stages%3B CONTAINS InterPro DOMAIN/s: Helicase-ass…	.	maternal effect embryo arrest 29 (MEE29)%3B FUNCTIONS IN: helicase activity%2C ATP-dependent R helicase activity%2C ATP binding%2C ATP-dependent helicase activity%2C nucleic acid binding%3B INVOLVED IN: embryo development ending in seed dormancy%3B LOCATED IN: endomembrane system%3B EXPRESSED IN: 22 plant structures%3B EXPRESSED DURING: 13 growth stages%3B CONTAINS InterPro DOMAIN/s: Helicase-ass…	scaffold_4	16770287	16777586	7300	+	scaffold_4	16770694	16771317	624	*	0.148118942931923	-0.178089367093931	189.861928825148	0.247847222222222	3.62583632362396	0.00310677786879	14.3637	0.160277777777778	0.228611111111111	0.0643809523809524	0.251451612903226	0.377777777777778	0.2175	NO	NO	NO	NO	NO	C	A	-2.72803562965254	1.35573999915768	-6.43831170349214	0.0911513923168843	-2.08440292298801	2.13131097849973	-6.16005192713578	0.322516141888518	-4.08377562881022	-6.52946309580902
AL4G31370	AT2G35340	OG0000458	MEE29	protein_coding	helicase domain-containing protein	maternal effect embryo arrest 29	maternal effect embryo arrest 29 (MEE29)%3B FUNCTIONS IN: helicase activity%2C ATP-dependent R helicase activity%2C ATP binding%2C ATP-dependent helicase activity%2C nucleic acid binding%3B INVOLVED IN: embryo development ending in seed dormancy%3B LOCATED IN: endomembrane system%3B EXPRESSED IN: 22 plant structures%3B EXPRESSED DURING: 13 growth stages%3B CONTAINS InterPro DOMAIN/s: Helicase-ass…	.	maternal effect embryo arrest 29 (MEE29)%3B FUNCTIONS IN: helicase activity%2C ATP-dependent R helicase activity%2C ATP binding%2C ATP-dependent helicase activity%2C nucleic acid binding%3B INVOLVED IN: embryo development ending in seed dormancy%3B LOCATED IN: endomembrane system%3B EXPRESSED IN: 22 plant structures%3B EXPRESSED DURING: 13 growth stages%3B CONTAINS InterPro DOMAIN/s: Helicase-ass…	scaffold_4	16770287	16777586	7300	+	scaffold_4	16771819	16772230	412	*	0.133772744253559	-0.0337026140761163	253.436685202072	0.432361111111111	1.65029388695932	0.0138753078716	3.4284	0.172361111111111	0.307083333333333	0.262793650793651	0.39008064516129	0.481111111111111	0.30875	NO	NO	NO	NO	NO	C	A	-0.927558641981181	2.33233658828919	-3.22701566721947	0.595044482428176	-0.283925935316649	3.10790756763124	-2.94875589086311	0.826409231999809	-3.25989523027037	-3.82206014964765
AL4G31370	AT2G35340	OG0000458	MEE29	protein_coding	helicase domain-containing protein	maternal effect embryo arrest 29	maternal effect embryo arrest 29 (MEE29)%3B FUNCTIONS IN: helicase activity%2C ATP-dependent R helicase activity%2C ATP binding%2C ATP-dependent helicase activity%2C nucleic acid binding%3B INVOLVED IN: embryo development ending in seed dormancy%3B LOCATED IN: endomembrane system%3B EXPRESSED IN: 22 plant structures%3B EXPRESSED DURING: 13 growth stages%3B CONTAINS InterPro DOMAIN/s: Helicase-ass…	.	maternal effect embryo arrest 29 (MEE29)%3B FUNCTIONS IN: helicase activity%2C ATP-dependent R helicase activity%2C ATP binding%2C ATP-dependent helicase activity%2C nucleic acid binding%3B INVOLVED IN: embryo development ending in seed dormancy%3B LOCATED IN: endomembrane system%3B EXPRESSED IN: 22 plant structures%3B EXPRESSED DURING: 13 growth stages%3B CONTAINS InterPro DOMAIN/s: Helicase-ass…	scaffold_4	16770287	16777586	7300	+	scaffold_4	16770694	16771317	624	*	0.148118942931923	-0.178089367093931	189.861928825148	0.247847222222222	3.62583632362396	0.00310677786879	14.3637	0.160277777777778	0.228611111111111	0.0643809523809524	0.251451612903226	0.377777777777778	0.2175	NO	NO	NO	NO	NO	C	A	-2.72803562965254	1.35573999915768	-6.43831170349214	0.0911513923168843	-2.08440292298801	2.13131097849973	-6.16005192713578	0.322516141888518	-4.08377562881022	-6.52946309580902
AL4G31370	AT2G35340	OG0000458	MEE29	protein_coding	helicase domain-containing protein	maternal effect embryo arrest 29	maternal effect embryo arrest 29 (MEE29)%3B FUNCTIONS IN: helicase activity%2C ATP-dependent R helicase activity%2C ATP binding%2C ATP-dependent helicase activity%2C nucleic acid binding%3B INVOLVED IN: embryo development ending in seed dormancy%3B LOCATED IN: endomembrane system%3B EXPRESSED IN: 22 plant structures%3B EXPRESSED DURING: 13 growth stages%3B CONTAINS InterPro DOMAIN/s: Helicase-ass…	.	maternal effect embryo arrest 29 (MEE29)%3B FUNCTIONS IN: helicase activity%2C ATP-dependent R helicase activity%2C ATP binding%2C ATP-dependent helicase activity%2C nucleic acid binding%3B INVOLVED IN: embryo development ending in seed dormancy%3B LOCATED IN: endomembrane system%3B EXPRESSED IN: 22 plant structures%3B EXPRESSED DURING: 13 growth stages%3B CONTAINS InterPro DOMAIN/s: Helicase-ass…	scaffold_4	16770287	16777586	7300	+	scaffold_4	16771341	16771806	466	*	0.179325288034517	-0.153010147909444	228.243536815697	0.344097222222222	3.49671398468364	0.0138753078716	19.6022	0.252777777777778	0.299444444444444	0.126539682539683	0.332903225806452	0.567777777777778	0.315	NO	NO	NO	NO	NO	B	A	-0.671641787129786	1.49622805597408	-4.53997912820369	0.540763316217001	-0.0280090804652543	2.27179903531613	-4.26171935184733	0.772128065788634	-2.16786984310387	-5.08074244442069
AL4G31370	AT2G35340	OG0000458	MEE29	protein_coding	helicase domain-containing protein	maternal effect embryo arrest 29	maternal effect embryo arrest 29 (MEE29)%3B FUNCTIONS IN: helicase activity%2C ATP-dependent R helicase activity%2C ATP binding%2C ATP-dependent helicase activity%2C nucleic acid binding%3B INVOLVED IN: embryo development ending in seed dormancy%3B LOCATED IN: endomembrane system%3B EXPRESSED IN: 22 plant structures%3B EXPRESSED DURING: 13 growth stages%3B CONTAINS InterPro DOMAIN/s: Helicase-ass…	.	maternal effect embryo arrest 29 (MEE29)%3B FUNCTIONS IN: helicase activity%2C ATP-dependent R helicase activity%2C ATP binding%2C ATP-dependent helicase activity%2C nucleic acid binding%3B INVOLVED IN: embryo development ending in seed dormancy%3B LOCATED IN: endomembrane system%3B EXPRESSED IN: 22 plant structures%3B EXPRESSED DURING: 13 growth stages%3B CONTAINS InterPro DOMAIN/s: Helicase-ass…	scaffold_4	16770287	16777586	7300	+	scaffold_4	16771819	16772230	412	*	0.133772744253559	-0.0337026140761163	253.436685202072	0.432361111111111	1.65029388695932	0.0138753078716	3.4284	0.172361111111111	0.307083333333333	0.262793650793651	0.39008064516129	0.481111111111111	0.30875	NO	MODERATE	NO	NO	NO	C	A	-0.927558641981181	2.33233658828919	-3.22701566721947	0.595044482428176	-0.283925935316649	3.10790756763124	-2.94875589086311	0.826409231999809	-3.25989523027037	-3.82206014964765
AL4G31370	AT2G35340	OG0000458	MEE29	protein_coding	helicase domain-containing protein	maternal effect embryo arrest 29	maternal effect embryo arrest 29 (MEE29)%3B FUNCTIONS IN: helicase activity%2C ATP-dependent R helicase activity%2C ATP binding%2C ATP-dependent helicase activity%2C nucleic acid binding%3B INVOLVED IN: embryo development ending in seed dormancy%3B LOCATED IN: endomembrane system%3B EXPRESSED IN: 22 plant structures%3B EXPRESSED DURING: 13 growth stages%3B CONTAINS InterPro DOMAIN/s: Helicase-ass…	.	maternal effect embryo arrest 29 (MEE29)%3B FUNCTIONS IN: helicase activity%2C ATP-dependent R helicase activity%2C ATP binding%2C ATP-dependent helicase activity%2C nucleic acid binding%3B INVOLVED IN: embryo development ending in seed dormancy%3B LOCATED IN: endomembrane system%3B EXPRESSED IN: 22 plant structures%3B EXPRESSED DURING: 13 growth stages%3B CONTAINS InterPro DOMAIN/s: Helicase-ass…	scaffold_4	16770287	16777586	7300	+	scaffold_4	16775411	16776795	1385	*	0.106538074168304	-0.161688343638753	142.431963730004	0.202916666666667	2.59746423269244	0.0138753078716	10.7086	-0.0770833333333333	0.169861111111111	0.0541587301587302	0.253306451612903	0.176666666666667	0.25375	NO	NO	NO	NO	NO	C	A	-2.2841444477864	-0.368307610705773	-0.0815923701523837	-0.8428943356943	-1.64051174112187	0.407263368636278	0.196667406203978	-0.611529586122667	-1.91583683708063	0.761301965541916
AL4G31370	AT2G35340	OG0000458	MEE29	protein_coding	helicase domain-containing protein	maternal effect embryo arrest 29	maternal effect embryo arrest 29 (MEE29)%3B FUNCTIONS IN: helicase activity%2C ATP-dependent R helicase activity%2C ATP binding%2C ATP-dependent helicase activity%2C nucleic acid binding%3B INVOLVED IN: embryo development ending in seed dormancy%3B LOCATED IN: endomembrane system%3B EXPRESSED IN: 22 plant structures%3B EXPRESSED DURING: 13 growth stages%3B CONTAINS InterPro DOMAIN/s: Helicase-ass…	.	maternal effect embryo arrest 29 (MEE29)%3B FUNCTIONS IN: helicase activity%2C ATP-dependent R helicase activity%2C ATP binding%2C ATP-dependent helicase activity%2C nucleic acid binding%3B INVOLVED IN: embryo development ending in seed dormancy%3B LOCATED IN: endomembrane system%3B EXPRESSED IN: 22 plant structures%3B EXPRESSED DURING: 13 growth stages%3B CONTAINS InterPro DOMAIN/s: Helicase-ass…	scaffold_4	16770287	16777586	7300	+	scaffold_4	16770295	16770654	360	*	0.197557667190207	-0.0845728447650114	236.888493601892	0.383263888888889	3.5211441903696	0.0115902253789	8.8148	0.195694444444444	0.305138888888889	0.205333333333333	0.269274193548387	0.444444444444444	0.24875	NO	NO	NO	NO	NO	C	A	-1.83685613952842	-0.485608318338892	-3.00619228010981	0.0522328203164153	-1.19322343286389	0.289962661003159	-2.72793250375345	0.283597569888049	-1.35124782118953	-3.05842510042623
AL4G31370	AT2G35340	OG0000458	MEE29	protein_coding	helicase domain-containing protein	maternal effect embryo arrest 29	maternal effect embryo arrest 29 (MEE29)%3B FUNCTIONS IN: helicase activity%2C ATP-dependent R helicase activity%2C ATP binding%2C ATP-dependent helicase activity%2C nucleic acid binding%3B INVOLVED IN: embryo development ending in seed dormancy%3B LOCATED IN: endomembrane system%3B EXPRESSED IN: 22 plant structures%3B EXPRESSED DURING: 13 growth stages%3B CONTAINS InterPro DOMAIN/s: Helicase-ass…	.	maternal effect embryo arrest 29 (MEE29)%3B FUNCTIONS IN: helicase activity%2C ATP-dependent R helicase activity%2C ATP binding%2C ATP-dependent helicase activity%2C nucleic acid binding%3B INVOLVED IN: embryo development ending in seed dormancy%3B LOCATED IN: endomembrane system%3B EXPRESSED IN: 22 plant structures%3B EXPRESSED DURING: 13 growth stages%3B CONTAINS InterPro DOMAIN/s: Helicase-ass…	scaffold_4	16770287	16777586	7300	+	scaffold_4	16771341	16771806	466	*	0.179325288034517	-0.153010147909444	228.243536815697	0.344097222222222	3.49671398468364	0.0138753078716	19.6022	0.252777777777778	0.299444444444444	0.126539682539683	0.332903225806452	0.567777777777778	0.315	NO	NO	NO	NO	NO	C	A	-0.671641787129786	1.49622805597408	-4.53997912820369	0.540763316217001	-0.0280090804652543	2.27179903531613	-4.26171935184733	0.772128065788634	-2.16786984310387	-5.08074244442069
AL4G31370	AT2G35340	OG0000458	MEE29	protein_coding	helicase domain-containing protein	maternal effect embryo arrest 29	maternal effect embryo arrest 29 (MEE29)%3B FUNCTIONS IN: helicase activity%2C ATP-dependent R helicase activity%2C ATP binding%2C ATP-dependent helicase activity%2C nucleic acid binding%3B INVOLVED IN: embryo development ending in seed dormancy%3B LOCATED IN: endomembrane system%3B EXPRESSED IN: 22 plant structures%3B EXPRESSED DURING: 13 growth stages%3B CONTAINS InterPro DOMAIN/s: Helicase-ass…	.	maternal effect embryo arrest 29 (MEE29)%3B FUNCTIONS IN: helicase activity%2C ATP-dependent R helicase activity%2C ATP binding%2C ATP-dependent helicase activity%2C nucleic acid binding%3B INVOLVED IN: embryo development ending in seed dormancy%3B LOCATED IN: endomembrane system%3B EXPRESSED IN: 22 plant structures%3B EXPRESSED DURING: 13 growth stages%3B CONTAINS InterPro DOMAIN/s: Helicase-ass…	scaffold_4	16770287	16777586	7300	+	scaffold_4	16771341	16771806	466	*	0.179325288034517	-0.153010147909444	228.243536815697	0.344097222222222	3.49671398468364	0.0138753078716	19.6022	0.252777777777778	0.299444444444444	0.126539682539683	0.332903225806452	0.567777777777778	0.315	NO	NO	NO	NO	NO	C	A	-0.671641787129786	1.49622805597408	-4.53997912820369	0.540763316217001	-0.0280090804652543	2.27179903531613	-4.26171935184733	0.772128065788634	-2.16786984310387	-5.08074244442069
AL4G31370	AT2G35340	OG0000458	MEE29	protein_coding	helicase domain-containing protein	maternal effect embryo arrest 29	maternal effect embryo arrest 29 (MEE29)%3B FUNCTIONS IN: helicase activity%2C ATP-dependent R helicase activity%2C ATP binding%2C ATP-dependent helicase activity%2C nucleic acid binding%3B INVOLVED IN: embryo development ending in seed dormancy%3B LOCATED IN: endomembrane system%3B EXPRESSED IN: 22 plant structures%3B EXPRESSED DURING: 13 growth stages%3B CONTAINS InterPro DOMAIN/s: Helicase-ass…	.	maternal effect embryo arrest 29 (MEE29)%3B FUNCTIONS IN: helicase activity%2C ATP-dependent R helicase activity%2C ATP binding%2C ATP-dependent helicase activity%2C nucleic acid binding%3B INVOLVED IN: embryo development ending in seed dormancy%3B LOCATED IN: endomembrane system%3B EXPRESSED IN: 22 plant structures%3B EXPRESSED DURING: 13 growth stages%3B CONTAINS InterPro DOMAIN/s: Helicase-ass…	scaffold_4	16770287	16777586	7300	+	scaffold_4	16770694	16771317	624	*	0.148118942931923	-0.178089367093931	189.861928825148	0.247847222222222	3.62583632362396	0.00310677786879	14.3637	0.160277777777778	0.228611111111111	0.0643809523809524	0.251451612903226	0.377777777777778	0.2175	NO	NO	NO	NO	NO	C	A	-2.72803562965254	1.35573999915768	-6.43831170349214	0.0911513923168843	-2.08440292298801	2.13131097849973	-6.16005192713578	0.322516141888518	-4.08377562881022	-6.52946309580902
AL4G31370	AT2G35340	OG0000458	MEE29	protein_coding	helicase domain-containing protein	maternal effect embryo arrest 29	maternal effect embryo arrest 29 (MEE29)%3B FUNCTIONS IN: helicase activity%2C ATP-dependent R helicase activity%2C ATP binding%2C ATP-dependent helicase activity%2C nucleic acid binding%3B INVOLVED IN: embryo development ending in seed dormancy%3B LOCATED IN: endomembrane system%3B EXPRESSED IN: 22 plant structures%3B EXPRESSED DURING: 13 growth stages%3B CONTAINS InterPro DOMAIN/s: Helicase-ass…	.	maternal effect embryo arrest 29 (MEE29)%3B FUNCTIONS IN: helicase activity%2C ATP-dependent R helicase activity%2C ATP binding%2C ATP-dependent helicase activity%2C nucleic acid binding%3B INVOLVED IN: embryo development ending in seed dormancy%3B LOCATED IN: endomembrane system%3B EXPRESSED IN: 22 plant structures%3B EXPRESSED DURING: 13 growth stages%3B CONTAINS InterPro DOMAIN/s: Helicase-ass…	scaffold_4	16770287	16777586	7300	+	scaffold_4	16771341	16771806	466	*	0.179325288034517	-0.153010147909444	228.243536815697	0.344097222222222	3.49671398468364	0.0138753078716	19.6022	0.252777777777778	0.299444444444444	0.126539682539683	0.332903225806452	0.567777777777778	0.315	NO	NO	NO	NO	NO	C	A	-0.671641787129786	1.49622805597408	-4.53997912820369	0.540763316217001	-0.0280090804652543	2.27179903531613	-4.26171935184733	0.772128065788634	-2.16786984310387	-5.08074244442069
AL4G31370	AT2G35340	OG0000458	MEE29	protein_coding	helicase domain-containing protein	maternal effect embryo arrest 29	maternal effect embryo arrest 29 (MEE29)%3B FUNCTIONS IN: helicase activity%2C ATP-dependent R helicase activity%2C ATP binding%2C ATP-dependent helicase activity%2C nucleic acid binding%3B INVOLVED IN: embryo development ending in seed dormancy%3B LOCATED IN: endomembrane system%3B EXPRESSED IN: 22 plant structures%3B EXPRESSED DURING: 13 growth stages%3B CONTAINS InterPro DOMAIN/s: Helicase-ass…	.	maternal effect embryo arrest 29 (MEE29)%3B FUNCTIONS IN: helicase activity%2C ATP-dependent R helicase activity%2C ATP binding%2C ATP-dependent helicase activity%2C nucleic acid binding%3B INVOLVED IN: embryo development ending in seed dormancy%3B LOCATED IN: endomembrane system%3B EXPRESSED IN: 22 plant structures%3B EXPRESSED DURING: 13 growth stages%3B CONTAINS InterPro DOMAIN/s: Helicase-ass…	scaffold_4	16770287	16777586	7300	+	scaffold_4	16771341	16771806	466	*	0.179325288034517	-0.153010147909444	228.243536815697	0.344097222222222	3.49671398468364	0.0138753078716	19.6022	0.252777777777778	0.299444444444444	0.126539682539683	0.332903225806452	0.567777777777778	0.315	NO	NO	NO	NO	NO	C	A	-0.671641787129786	1.49622805597408	-4.53997912820369	0.540763316217001	-0.0280090804652543	2.27179903531613	-4.26171935184733	0.772128065788634	-2.16786984310387	-5.08074244442069
AL4G31370	AT2G35340	OG0000458	MEE29	protein_coding	helicase domain-containing protein	maternal effect embryo arrest 29	maternal effect embryo arrest 29 (MEE29)%3B FUNCTIONS IN: helicase activity%2C ATP-dependent R helicase activity%2C ATP binding%2C ATP-dependent helicase activity%2C nucleic acid binding%3B INVOLVED IN: embryo development ending in seed dormancy%3B LOCATED IN: endomembrane system%3B EXPRESSED IN: 22 plant structures%3B EXPRESSED DURING: 13 growth stages%3B CONTAINS InterPro DOMAIN/s: Helicase-ass…	.	maternal effect embryo arrest 29 (MEE29)%3B FUNCTIONS IN: helicase activity%2C ATP-dependent R helicase activity%2C ATP binding%2C ATP-dependent helicase activity%2C nucleic acid binding%3B INVOLVED IN: embryo development ending in seed dormancy%3B LOCATED IN: endomembrane system%3B EXPRESSED IN: 22 plant structures%3B EXPRESSED DURING: 13 growth stages%3B CONTAINS InterPro DOMAIN/s: Helicase-ass…	scaffold_4	16770287	16777586	7300	+	scaffold_4	16771819	16772230	412	*	0.133772744253559	-0.0337026140761163	253.436685202072	0.432361111111111	1.65029388695932	0.0138753078716	3.4284	0.172361111111111	0.307083333333333	0.262793650793651	0.39008064516129	0.481111111111111	0.30875	NO	NO	NO	NO	NO	C	A	-0.927558641981181	2.33233658828919	-3.22701566721947	0.595044482428176	-0.283925935316649	3.10790756763124	-2.94875589086311	0.826409231999809	-3.25989523027037	-3.82206014964765
AL4G31370	AT2G35340	OG0000458	MEE29	protein_coding	helicase domain-containing protein	maternal effect embryo arrest 29	maternal effect embryo arrest 29 (MEE29)%3B FUNCTIONS IN: helicase activity%2C ATP-dependent R helicase activity%2C ATP binding%2C ATP-dependent helicase activity%2C nucleic acid binding%3B INVOLVED IN: embryo development ending in seed dormancy%3B LOCATED IN: endomembrane system%3B EXPRESSED IN: 22 plant structures%3B EXPRESSED DURING: 13 growth stages%3B CONTAINS InterPro DOMAIN/s: Helicase-ass…	.	maternal effect embryo arrest 29 (MEE29)%3B FUNCTIONS IN: helicase activity%2C ATP-dependent R helicase activity%2C ATP binding%2C ATP-dependent helicase activity%2C nucleic acid binding%3B INVOLVED IN: embryo development ending in seed dormancy%3B LOCATED IN: endomembrane system%3B EXPRESSED IN: 22 plant structures%3B EXPRESSED DURING: 13 growth stages%3B CONTAINS InterPro DOMAIN/s: Helicase-ass…	scaffold_4	16770287	16777586	7300	+	scaffold_4	16771341	16771806	466	*	0.179325288034517	-0.153010147909444	228.243536815697	0.344097222222222	3.49671398468364	0.0138753078716	19.6022	0.252777777777778	0.299444444444444	0.126539682539683	0.332903225806452	0.567777777777778	0.315	NO	NO	NO	NO	NO	C	A	-0.671641787129786	1.49622805597408	-4.53997912820369	0.540763316217001	-0.0280090804652543	2.27179903531613	-4.26171935184733	0.772128065788634	-2.16786984310387	-5.08074244442069
AL4G31370	AT2G35340	OG0000458	MEE29	protein_coding	helicase domain-containing protein	maternal effect embryo arrest 29	maternal effect embryo arrest 29 (MEE29)%3B FUNCTIONS IN: helicase activity%2C ATP-dependent R helicase activity%2C ATP binding%2C ATP-dependent helicase activity%2C nucleic acid binding%3B INVOLVED IN: embryo development ending in seed dormancy%3B LOCATED IN: endomembrane system%3B EXPRESSED IN: 22 plant structures%3B EXPRESSED DURING: 13 growth stages%3B CONTAINS InterPro DOMAIN/s: Helicase-ass…	.	maternal effect embryo arrest 29 (MEE29)%3B FUNCTIONS IN: helicase activity%2C ATP-dependent R helicase activity%2C ATP binding%2C ATP-dependent helicase activity%2C nucleic acid binding%3B INVOLVED IN: embryo development ending in seed dormancy%3B LOCATED IN: endomembrane system%3B EXPRESSED IN: 22 plant structures%3B EXPRESSED DURING: 13 growth stages%3B CONTAINS InterPro DOMAIN/s: Helicase-ass…	scaffold_4	16770287	16777586	7300	+	scaffold_4	16771819	16772230	412	*	0.133772744253559	-0.0337026140761163	253.436685202072	0.432361111111111	1.65029388695932	0.0138753078716	3.4284	0.172361111111111	0.307083333333333	0.262793650793651	0.39008064516129	0.481111111111111	0.30875	NO	NO	NO	NO	NO	C	A	-0.927558641981181	2.33233658828919	-3.22701566721947	0.595044482428176	-0.283925935316649	3.10790756763124	-2.94875589086311	0.826409231999809	-3.25989523027037	-3.82206014964765
AL4G31370	AT2G35340	OG0000458	MEE29	protein_coding	helicase domain-containing protein	maternal effect embryo arrest 29	maternal effect embryo arrest 29 (MEE29)%3B FUNCTIONS IN: helicase activity%2C ATP-dependent R helicase activity%2C ATP binding%2C ATP-dependent helicase activity%2C nucleic acid binding%3B INVOLVED IN: embryo development ending in seed dormancy%3B LOCATED IN: endomembrane system%3B EXPRESSED IN: 22 plant structures%3B EXPRESSED DURING: 13 growth stages%3B CONTAINS InterPro DOMAIN/s: Helicase-ass…	.	maternal effect embryo arrest 29 (MEE29)%3B FUNCTIONS IN: helicase activity%2C ATP-dependent R helicase activity%2C ATP binding%2C ATP-dependent helicase activity%2C nucleic acid binding%3B INVOLVED IN: embryo development ending in seed dormancy%3B LOCATED IN: endomembrane system%3B EXPRESSED IN: 22 plant structures%3B EXPRESSED DURING: 13 growth stages%3B CONTAINS InterPro DOMAIN/s: Helicase-ass…	scaffold_4	16770287	16777586	7300	+	scaffold_4	16771341	16771806	466	*	0.179325288034517	-0.153010147909444	228.243536815697	0.344097222222222	3.49671398468364	0.0138753078716	19.6022	0.252777777777778	0.299444444444444	0.126539682539683	0.332903225806452	0.567777777777778	0.315	NO	NO	NO	NO	NO	C	A	-0.671641787129786	1.49622805597408	-4.53997912820369	0.540763316217001	-0.0280090804652543	2.27179903531613	-4.26171935184733	0.772128065788634	-2.16786984310387	-5.08074244442069
AL4G31370	AT2G35340	OG0000458	MEE29	protein_coding	helicase domain-containing protein	maternal effect embryo arrest 29	maternal effect embryo arrest 29 (MEE29)%3B FUNCTIONS IN: helicase activity%2C ATP-dependent R helicase activity%2C ATP binding%2C ATP-dependent helicase activity%2C nucleic acid binding%3B INVOLVED IN: embryo development ending in seed dormancy%3B LOCATED IN: endomembrane system%3B EXPRESSED IN: 22 plant structures%3B EXPRESSED DURING: 13 growth stages%3B CONTAINS InterPro DOMAIN/s: Helicase-ass…	.	maternal effect embryo arrest 29 (MEE29)%3B FUNCTIONS IN: helicase activity%2C ATP-dependent R helicase activity%2C ATP binding%2C ATP-dependent helicase activity%2C nucleic acid binding%3B INVOLVED IN: embryo development ending in seed dormancy%3B LOCATED IN: endomembrane system%3B EXPRESSED IN: 22 plant structures%3B EXPRESSED DURING: 13 growth stages%3B CONTAINS InterPro DOMAIN/s: Helicase-ass…	scaffold_4	16770287	16777586	7300	+	scaffold_4	16771341	16771806	466	*	0.179325288034517	-0.153010147909444	228.243536815697	0.344097222222222	3.49671398468364	0.0138753078716	19.6022	0.252777777777778	0.299444444444444	0.126539682539683	0.332903225806452	0.567777777777778	0.315	NO	NO	NO	NO	NO	C	A	-0.671641787129786	1.49622805597408	-4.53997912820369	0.540763316217001	-0.0280090804652543	2.27179903531613	-4.26171935184733	0.772128065788634	-2.16786984310387	-5.08074244442069
AL4G31370	AT2G35340	OG0000458	MEE29	protein_coding	helicase domain-containing protein	maternal effect embryo arrest 29	maternal effect embryo arrest 29 (MEE29)%3B FUNCTIONS IN: helicase activity%2C ATP-dependent R helicase activity%2C ATP binding%2C ATP-dependent helicase activity%2C nucleic acid binding%3B INVOLVED IN: embryo development ending in seed dormancy%3B LOCATED IN: endomembrane system%3B EXPRESSED IN: 22 plant structures%3B EXPRESSED DURING: 13 growth stages%3B CONTAINS InterPro DOMAIN/s: Helicase-ass…	.	maternal effect embryo arrest 29 (MEE29)%3B FUNCTIONS IN: helicase activity%2C ATP-dependent R helicase activity%2C ATP binding%2C ATP-dependent helicase activity%2C nucleic acid binding%3B INVOLVED IN: embryo development ending in seed dormancy%3B LOCATED IN: endomembrane system%3B EXPRESSED IN: 22 plant structures%3B EXPRESSED DURING: 13 growth stages%3B CONTAINS InterPro DOMAIN/s: Helicase-ass…	scaffold_4	16770287	16777586	7300	+	scaffold_4	16775411	16776795	1385	*	0.106538074168304	-0.161688343638753	142.431963730004	0.202916666666667	2.59746423269244	0.0138753078716	10.7086	-0.0770833333333333	0.169861111111111	0.0541587301587302	0.253306451612903	0.176666666666667	0.25375	NO	NO	NO	NO	NO	C	A	-2.2841444477864	-0.368307610705773	-0.0815923701523837	-0.8428943356943	-1.64051174112187	0.407263368636278	0.196667406203978	-0.611529586122667	-1.91583683708063	0.761301965541916
AL4G31370	AT2G35340	OG0000458	MEE29	protein_coding	helicase domain-containing protein	maternal effect embryo arrest 29	maternal effect embryo arrest 29 (MEE29)%3B FUNCTIONS IN: helicase activity%2C ATP-dependent R helicase activity%2C ATP binding%2C ATP-dependent helicase activity%2C nucleic acid binding%3B INVOLVED IN: embryo development ending in seed dormancy%3B LOCATED IN: endomembrane system%3B EXPRESSED IN: 22 plant structures%3B EXPRESSED DURING: 13 growth stages%3B CONTAINS InterPro DOMAIN/s: Helicase-ass…	.	maternal effect embryo arrest 29 (MEE29)%3B FUNCTIONS IN: helicase activity%2C ATP-dependent R helicase activity%2C ATP binding%2C ATP-dependent helicase activity%2C nucleic acid binding%3B INVOLVED IN: embryo development ending in seed dormancy%3B LOCATED IN: endomembrane system%3B EXPRESSED IN: 22 plant structures%3B EXPRESSED DURING: 13 growth stages%3B CONTAINS InterPro DOMAIN/s: Helicase-ass…	scaffold_4	16770287	16777586	7300	+	scaffold_4	16770295	16770654	360	*	0.197557667190207	-0.0845728447650114	236.888493601892	0.383263888888889	3.5211441903696	0.0115902253789	8.8148	0.195694444444444	0.305138888888889	0.205333333333333	0.269274193548387	0.444444444444444	0.24875	NO	NO	NO	NO	NO	C	A	-1.83685613952842	-0.485608318338892	-3.00619228010981	0.0522328203164153	-1.19322343286389	0.289962661003159	-2.72793250375345	0.283597569888049	-1.35124782118953	-3.05842510042623
AL4G31370	AT2G35340	OG0000458	MEE29	protein_coding	helicase domain-containing protein	maternal effect embryo arrest 29	maternal effect embryo arrest 29 (MEE29)%3B FUNCTIONS IN: helicase activity%2C ATP-dependent R helicase activity%2C ATP binding%2C ATP-dependent helicase activity%2C nucleic acid binding%3B INVOLVED IN: embryo development ending in seed dormancy%3B LOCATED IN: endomembrane system%3B EXPRESSED IN: 22 plant structures%3B EXPRESSED DURING: 13 growth stages%3B CONTAINS InterPro DOMAIN/s: Helicase-ass…	.	maternal effect embryo arrest 29 (MEE29)%3B FUNCTIONS IN: helicase activity%2C ATP-dependent R helicase activity%2C ATP binding%2C ATP-dependent helicase activity%2C nucleic acid binding%3B INVOLVED IN: embryo development ending in seed dormancy%3B LOCATED IN: endomembrane system%3B EXPRESSED IN: 22 plant structures%3B EXPRESSED DURING: 13 growth stages%3B CONTAINS InterPro DOMAIN/s: Helicase-ass…	scaffold_4	16770287	16777586	7300	+	scaffold_4	16770295	16770654	360	*	0.197557667190207	-0.0845728447650114	236.888493601892	0.383263888888889	3.5211441903696	0.0115902253789	8.8148	0.195694444444444	0.305138888888889	0.205333333333333	0.269274193548387	0.444444444444444	0.24875	NO	NO	NO	NO	NO	B	A	-1.83685613952842	-0.485608318338892	-3.00619228010981	0.0522328203164153	-1.19322343286389	0.289962661003159	-2.72793250375345	0.283597569888049	-1.35124782118953	-3.05842510042623
AL4G31370	AT2G35340	OG0000458	MEE29	protein_coding	helicase domain-containing protein	maternal effect embryo arrest 29	maternal effect embryo arrest 29 (MEE29)%3B FUNCTIONS IN: helicase activity%2C ATP-dependent R helicase activity%2C ATP binding%2C ATP-dependent helicase activity%2C nucleic acid binding%3B INVOLVED IN: embryo development ending in seed dormancy%3B LOCATED IN: endomembrane system%3B EXPRESSED IN: 22 plant structures%3B EXPRESSED DURING: 13 growth stages%3B CONTAINS InterPro DOMAIN/s: Helicase-ass…	.	maternal effect embryo arrest 29 (MEE29)%3B FUNCTIONS IN: helicase activity%2C ATP-dependent R helicase activity%2C ATP binding%2C ATP-dependent helicase activity%2C nucleic acid binding%3B INVOLVED IN: embryo development ending in seed dormancy%3B LOCATED IN: endomembrane system%3B EXPRESSED IN: 22 plant structures%3B EXPRESSED DURING: 13 growth stages%3B CONTAINS InterPro DOMAIN/s: Helicase-ass…	scaffold_4	16770287	16777586	7300	+	scaffold_4	16770295	16770654	360	*	0.197557667190207	-0.0845728447650114	236.888493601892	0.383263888888889	3.5211441903696	0.0115902253789	8.8148	0.195694444444444	0.305138888888889	0.205333333333333	0.269274193548387	0.444444444444444	0.24875	NO	NO	NO	NO	NO	C	A	-1.83685613952842	-0.485608318338892	-3.00619228010981	0.0522328203164153	-1.19322343286389	0.289962661003159	-2.72793250375345	0.283597569888049	-1.35124782118953	-3.05842510042623
AL4G31370	AT2G35340	OG0000458	MEE29	protein_coding	helicase domain-containing protein	maternal effect embryo arrest 29	maternal effect embryo arrest 29 (MEE29)%3B FUNCTIONS IN: helicase activity%2C ATP-dependent R helicase activity%2C ATP binding%2C ATP-dependent helicase activity%2C nucleic acid binding%3B INVOLVED IN: embryo development ending in seed dormancy%3B LOCATED IN: endomembrane system%3B EXPRESSED IN: 22 plant structures%3B EXPRESSED DURING: 13 growth stages%3B CONTAINS InterPro DOMAIN/s: Helicase-ass…	.	maternal effect embryo arrest 29 (MEE29)%3B FUNCTIONS IN: helicase activity%2C ATP-dependent R helicase activity%2C ATP binding%2C ATP-dependent helicase activity%2C nucleic acid binding%3B INVOLVED IN: embryo development ending in seed dormancy%3B LOCATED IN: endomembrane system%3B EXPRESSED IN: 22 plant structures%3B EXPRESSED DURING: 13 growth stages%3B CONTAINS InterPro DOMAIN/s: Helicase-ass…	scaffold_4	16770287	16777586	7300	+	scaffold_4	16770694	16771317	624	*	0.148118942931923	-0.178089367093931	189.861928825148	0.247847222222222	3.62583632362396	0.00310677786879	14.3637	0.160277777777778	0.228611111111111	0.0643809523809524	0.251451612903226	0.377777777777778	0.2175	NO	NO	NO	NO	NO	C	A	-2.72803562965254	1.35573999915768	-6.43831170349214	0.0911513923168843	-2.08440292298801	2.13131097849973	-6.16005192713578	0.322516141888518	-4.08377562881022	-6.52946309580902
AL4G31370	AT2G35340	OG0000458	MEE29	protein_coding	helicase domain-containing protein	maternal effect embryo arrest 29	maternal effect embryo arrest 29 (MEE29)%3B FUNCTIONS IN: helicase activity%2C ATP-dependent R helicase activity%2C ATP binding%2C ATP-dependent helicase activity%2C nucleic acid binding%3B INVOLVED IN: embryo development ending in seed dormancy%3B LOCATED IN: endomembrane system%3B EXPRESSED IN: 22 plant structures%3B EXPRESSED DURING: 13 growth stages%3B CONTAINS InterPro DOMAIN/s: Helicase-ass…	.	maternal effect embryo arrest 29 (MEE29)%3B FUNCTIONS IN: helicase activity%2C ATP-dependent R helicase activity%2C ATP binding%2C ATP-dependent helicase activity%2C nucleic acid binding%3B INVOLVED IN: embryo development ending in seed dormancy%3B LOCATED IN: endomembrane system%3B EXPRESSED IN: 22 plant structures%3B EXPRESSED DURING: 13 growth stages%3B CONTAINS InterPro DOMAIN/s: Helicase-ass…	scaffold_4	16770287	16777586	7300	+	scaffold_4	16770295	16770654	360	*	0.197557667190207	-0.0845728447650114	236.888493601892	0.383263888888889	3.5211441903696	0.0115902253789	8.8148	0.195694444444444	0.305138888888889	0.205333333333333	0.269274193548387	0.444444444444444	0.24875	NO	NO	NO	NO	NO	C	A	-1.83685613952842	-0.485608318338892	-3.00619228010981	0.0522328203164153	-1.19322343286389	0.289962661003159	-2.72793250375345	0.283597569888049	-1.35124782118953	-3.05842510042623
AL4G31370	AT2G35340	OG0000458	MEE29	protein_coding	helicase domain-containing protein	maternal effect embryo arrest 29	maternal effect embryo arrest 29 (MEE29)%3B FUNCTIONS IN: helicase activity%2C ATP-dependent R helicase activity%2C ATP binding%2C ATP-dependent helicase activity%2C nucleic acid binding%3B INVOLVED IN: embryo development ending in seed dormancy%3B LOCATED IN: endomembrane system%3B EXPRESSED IN: 22 plant structures%3B EXPRESSED DURING: 13 growth stages%3B CONTAINS InterPro DOMAIN/s: Helicase-ass…	.	maternal effect embryo arrest 29 (MEE29)%3B FUNCTIONS IN: helicase activity%2C ATP-dependent R helicase activity%2C ATP binding%2C ATP-dependent helicase activity%2C nucleic acid binding%3B INVOLVED IN: embryo development ending in seed dormancy%3B LOCATED IN: endomembrane system%3B EXPRESSED IN: 22 plant structures%3B EXPRESSED DURING: 13 growth stages%3B CONTAINS InterPro DOMAIN/s: Helicase-ass…	scaffold_4	16770287	16777586	7300	+	scaffold_4	16770295	16770654	360	*	0.197557667190207	-0.0845728447650114	236.888493601892	0.383263888888889	3.5211441903696	0.0115902253789	8.8148	0.195694444444444	0.305138888888889	0.205333333333333	0.269274193548387	0.444444444444444	0.24875	NO	NO	NO	NO	NO	C	A	-1.83685613952842	-0.485608318338892	-3.00619228010981	0.0522328203164153	-1.19322343286389	0.289962661003159	-2.72793250375345	0.283597569888049	-1.35124782118953	-3.05842510042623
AL4G31370	AT1G32490	OG0000458	ESP3	protein_coding	R helicase family protein	ENHANCED SILENCING PHENOTYPE 3	ENHANCED SILENCING PHENOTYPE 3 (ESP3)%3B FUNCTIONS IN: helicase activity%2C ATP-dependent R helicase activity%2C ATP binding%2C ATP-dependent helicase activity%2C nucleic acid binding%3B INVOLVED IN: R splicing%2C posttranscriptional gene silencing by R%2C embryo development ending in seed dormancy%3B LOCATED IN: endomembrane system%3B EXPRESSED IN: 24 plant structures%3B EXPRESSED DURING: 13 gro…	Encodes a homolog of the yeast PRP2 protein%2C one of four related DEAH R helicases identified as essential cofactors for R splicing.	ENHANCED SILENCING PHENOTYPE 3 (ESP3)%3B FUNCTIONS IN: helicase activity%2C ATP-dependent R helicase activity%2C ATP binding%2C ATP-dependent helicase activity%2C nucleic acid binding%3B INVOLVED IN: R splicing%2C posttranscriptional gene silencing by R%2C embryo development ending in seed dormancy%3B LOCATED IN: endomembrane system%3B EXPRESSED IN: 24 plant structures%3B EXPRESSED DURING: 13 gro…	scaffold_4	16770287	16777586	7300	+	scaffold_4	16771819	16772230	412	*	0.133772744253559	-0.0337026140761163	253.436685202072	0.432361111111111	1.65029388695932	0.0138753078716	3.4284	0.172361111111111	0.307083333333333	0.262793650793651	0.39008064516129	0.481111111111111	0.30875	NO	NO	NO	NO	NO	C	A	-0.927558641981181	2.33233658828919	-3.22701566721947	0.595044482428176	-0.283925935316649	3.10790756763124	-2.94875589086311	0.826409231999809	-3.25989523027037	-3.82206014964765
AL4G31370	AT1G32490	OG0000458	ESP3	protein_coding	R helicase family protein	ENHANCED SILENCING PHENOTYPE 3	ENHANCED SILENCING PHENOTYPE 3 (ESP3)%3B FUNCTIONS IN: helicase activity%2C ATP-dependent R helicase activity%2C ATP binding%2C ATP-dependent helicase activity%2C nucleic acid binding%3B INVOLVED IN: R splicing%2C posttranscriptional gene silencing by R%2C embryo development ending in seed dormancy%3B LOCATED IN: endomembrane system%3B EXPRESSED IN: 24 plant structures%3B EXPRESSED DURING: 13 gro…	Encodes a homolog of the yeast PRP2 protein%2C one of four related DEAH R helicases identified as essential cofactors for R splicing.	ENHANCED SILENCING PHENOTYPE 3 (ESP3)%3B FUNCTIONS IN: helicase activity%2C ATP-dependent R helicase activity%2C ATP binding%2C ATP-dependent helicase activity%2C nucleic acid binding%3B INVOLVED IN: R splicing%2C posttranscriptional gene silencing by R%2C embryo development ending in seed dormancy%3B LOCATED IN: endomembrane system%3B EXPRESSED IN: 24 plant structures%3B EXPRESSED DURING: 13 gro…	scaffold_4	16770287	16777586	7300	+	scaffold_4	16770694	16771317	624	*	0.148118942931923	-0.178089367093931	189.861928825148	0.247847222222222	3.62583632362396	0.00310677786879	14.3637	0.160277777777778	0.228611111111111	0.0643809523809524	0.251451612903226	0.377777777777778	0.2175	NO	NO	NO	NO	NO	C	A	-2.72803562965254	1.35573999915768	-6.43831170349214	0.0911513923168843	-2.08440292298801	2.13131097849973	-6.16005192713578	0.322516141888518	-4.08377562881022	-6.52946309580902
AL4G31370	AT1G32490	OG0000458	ESP3	protein_coding	R helicase family protein	ENHANCED SILENCING PHENOTYPE 3	ENHANCED SILENCING PHENOTYPE 3 (ESP3)%3B FUNCTIONS IN: helicase activity%2C ATP-dependent R helicase activity%2C ATP binding%2C ATP-dependent helicase activity%2C nucleic acid binding%3B INVOLVED IN: R splicing%2C posttranscriptional gene silencing by R%2C embryo development ending in seed dormancy%3B LOCATED IN: endomembrane system%3B EXPRESSED IN: 24 plant structures%3B EXPRESSED DURING: 13 gro…	Encodes a homolog of the yeast PRP2 protein%2C one of four related DEAH R helicases identified as essential cofactors for R splicing.	ENHANCED SILENCING PHENOTYPE 3 (ESP3)%3B FUNCTIONS IN: helicase activity%2C ATP-dependent R helicase activity%2C ATP binding%2C ATP-dependent helicase activity%2C nucleic acid binding%3B INVOLVED IN: R splicing%2C posttranscriptional gene silencing by R%2C embryo development ending in seed dormancy%3B LOCATED IN: endomembrane system%3B EXPRESSED IN: 24 plant structures%3B EXPRESSED DURING: 13 gro…	scaffold_4	16770287	16777586	7300	+	scaffold_4	16771819	16772230	412	*	0.133772744253559	-0.0337026140761163	253.436685202072	0.432361111111111	1.65029388695932	0.0138753078716	3.4284	0.172361111111111	0.307083333333333	0.262793650793651	0.39008064516129	0.481111111111111	0.30875	NO	NO	NO	NO	NO	C	A	-0.927558641981181	2.33233658828919	-3.22701566721947	0.595044482428176	-0.283925935316649	3.10790756763124	-2.94875589086311	0.826409231999809	-3.25989523027037	-3.82206014964765
AL4G31370	AT1G32490	OG0000458	ESP3	protein_coding	R helicase family protein	ENHANCED SILENCING PHENOTYPE 3	ENHANCED SILENCING PHENOTYPE 3 (ESP3)%3B FUNCTIONS IN: helicase activity%2C ATP-dependent R helicase activity%2C ATP binding%2C ATP-dependent helicase activity%2C nucleic acid binding%3B INVOLVED IN: R splicing%2C posttranscriptional gene silencing by R%2C embryo development ending in seed dormancy%3B LOCATED IN: endomembrane system%3B EXPRESSED IN: 24 plant structures%3B EXPRESSED DURING: 13 gro…	Encodes a homolog of the yeast PRP2 protein%2C one of four related DEAH R helicases identified as essential cofactors for R splicing.	ENHANCED SILENCING PHENOTYPE 3 (ESP3)%3B FUNCTIONS IN: helicase activity%2C ATP-dependent R helicase activity%2C ATP binding%2C ATP-dependent helicase activity%2C nucleic acid binding%3B INVOLVED IN: R splicing%2C posttranscriptional gene silencing by R%2C embryo development ending in seed dormancy%3B LOCATED IN: endomembrane system%3B EXPRESSED IN: 24 plant structures%3B EXPRESSED DURING: 13 gro…	scaffold_4	16770287	16777586	7300	+	scaffold_4	16770694	16771317	624	*	0.148118942931923	-0.178089367093931	189.861928825148	0.247847222222222	3.62583632362396	0.00310677786879	14.3637	0.160277777777778	0.228611111111111	0.0643809523809524	0.251451612903226	0.377777777777778	0.2175	NO	NO	NO	NO	NO	C	A	-2.72803562965254	1.35573999915768	-6.43831170349214	0.0911513923168843	-2.08440292298801	2.13131097849973	-6.16005192713578	0.322516141888518	-4.08377562881022	-6.52946309580902
AL4G31370	AT1G32490	OG0000458	ESP3	protein_coding	R helicase family protein	ENHANCED SILENCING PHENOTYPE 3	ENHANCED SILENCING PHENOTYPE 3 (ESP3)%3B FUNCTIONS IN: helicase activity%2C ATP-dependent R helicase activity%2C ATP binding%2C ATP-dependent helicase activity%2C nucleic acid binding%3B INVOLVED IN: R splicing%2C posttranscriptional gene silencing by R%2C embryo development ending in seed dormancy%3B LOCATED IN: endomembrane system%3B EXPRESSED IN: 24 plant structures%3B EXPRESSED DURING: 13 gro…	Encodes a homolog of the yeast PRP2 protein%2C one of four related DEAH R helicases identified as essential cofactors for R splicing.	ENHANCED SILENCING PHENOTYPE 3 (ESP3)%3B FUNCTIONS IN: helicase activity%2C ATP-dependent R helicase activity%2C ATP binding%2C ATP-dependent helicase activity%2C nucleic acid binding%3B INVOLVED IN: R splicing%2C posttranscriptional gene silencing by R%2C embryo development ending in seed dormancy%3B LOCATED IN: endomembrane system%3B EXPRESSED IN: 24 plant structures%3B EXPRESSED DURING: 13 gro…	scaffold_4	16770287	16777586	7300	+	scaffold_4	16771341	16771806	466	*	0.179325288034517	-0.153010147909444	228.243536815697	0.344097222222222	3.49671398468364	0.0138753078716	19.6022	0.252777777777778	0.299444444444444	0.126539682539683	0.332903225806452	0.567777777777778	0.315	NO	NO	NO	NO	NO	B	A	-0.671641787129786	1.49622805597408	-4.53997912820369	0.540763316217001	-0.0280090804652543	2.27179903531613	-4.26171935184733	0.772128065788634	-2.16786984310387	-5.08074244442069
AL4G31370	AT1G32490	OG0000458	ESP3	protein_coding	R helicase family protein	ENHANCED SILENCING PHENOTYPE 3	ENHANCED SILENCING PHENOTYPE 3 (ESP3)%3B FUNCTIONS IN: helicase activity%2C ATP-dependent R helicase activity%2C ATP binding%2C ATP-dependent helicase activity%2C nucleic acid binding%3B INVOLVED IN: R splicing%2C posttranscriptional gene silencing by R%2C embryo development ending in seed dormancy%3B LOCATED IN: endomembrane system%3B EXPRESSED IN: 24 plant structures%3B EXPRESSED DURING: 13 gro…	Encodes a homolog of the yeast PRP2 protein%2C one of four related DEAH R helicases identified as essential cofactors for R splicing.	ENHANCED SILENCING PHENOTYPE 3 (ESP3)%3B FUNCTIONS IN: helicase activity%2C ATP-dependent R helicase activity%2C ATP binding%2C ATP-dependent helicase activity%2C nucleic acid binding%3B INVOLVED IN: R splicing%2C posttranscriptional gene silencing by R%2C embryo development ending in seed dormancy%3B LOCATED IN: endomembrane system%3B EXPRESSED IN: 24 plant structures%3B EXPRESSED DURING: 13 gro…	scaffold_4	16770287	16777586	7300	+	scaffold_4	16771819	16772230	412	*	0.133772744253559	-0.0337026140761163	253.436685202072	0.432361111111111	1.65029388695932	0.0138753078716	3.4284	0.172361111111111	0.307083333333333	0.262793650793651	0.39008064516129	0.481111111111111	0.30875	NO	MODERATE	NO	NO	NO	C	A	-0.927558641981181	2.33233658828919	-3.22701566721947	0.595044482428176	-0.283925935316649	3.10790756763124	-2.94875589086311	0.826409231999809	-3.25989523027037	-3.82206014964765
AL4G31370	AT1G32490	OG0000458	ESP3	protein_coding	R helicase family protein	ENHANCED SILENCING PHENOTYPE 3	ENHANCED SILENCING PHENOTYPE 3 (ESP3)%3B FUNCTIONS IN: helicase activity%2C ATP-dependent R helicase activity%2C ATP binding%2C ATP-dependent helicase activity%2C nucleic acid binding%3B INVOLVED IN: R splicing%2C posttranscriptional gene silencing by R%2C embryo development ending in seed dormancy%3B LOCATED IN: endomembrane system%3B EXPRESSED IN: 24 plant structures%3B EXPRESSED DURING: 13 gro…	Encodes a homolog of the yeast PRP2 protein%2C one of four related DEAH R helicases identified as essential cofactors for R splicing.	ENHANCED SILENCING PHENOTYPE 3 (ESP3)%3B FUNCTIONS IN: helicase activity%2C ATP-dependent R helicase activity%2C ATP binding%2C ATP-dependent helicase activity%2C nucleic acid binding%3B INVOLVED IN: R splicing%2C posttranscriptional gene silencing by R%2C embryo development ending in seed dormancy%3B LOCATED IN: endomembrane system%3B EXPRESSED IN: 24 plant structures%3B EXPRESSED DURING: 13 gro…	scaffold_4	16770287	16777586	7300	+	scaffold_4	16775411	16776795	1385	*	0.106538074168304	-0.161688343638753	142.431963730004	0.202916666666667	2.59746423269244	0.0138753078716	10.7086	-0.0770833333333333	0.169861111111111	0.0541587301587302	0.253306451612903	0.176666666666667	0.25375	NO	NO	NO	NO	NO	C	A	-2.2841444477864	-0.368307610705773	-0.0815923701523837	-0.8428943356943	-1.64051174112187	0.407263368636278	0.196667406203978	-0.611529586122667	-1.91583683708063	0.761301965541916
AL4G31370	AT1G32490	OG0000458	ESP3	protein_coding	R helicase family protein	ENHANCED SILENCING PHENOTYPE 3	ENHANCED SILENCING PHENOTYPE 3 (ESP3)%3B FUNCTIONS IN: helicase activity%2C ATP-dependent R helicase activity%2C ATP binding%2C ATP-dependent helicase activity%2C nucleic acid binding%3B INVOLVED IN: R splicing%2C posttranscriptional gene silencing by R%2C embryo development ending in seed dormancy%3B LOCATED IN: endomembrane system%3B EXPRESSED IN: 24 plant structures%3B EXPRESSED DURING: 13 gro…	Encodes a homolog of the yeast PRP2 protein%2C one of four related DEAH R helicases identified as essential cofactors for R splicing.	ENHANCED SILENCING PHENOTYPE 3 (ESP3)%3B FUNCTIONS IN: helicase activity%2C ATP-dependent R helicase activity%2C ATP binding%2C ATP-dependent helicase activity%2C nucleic acid binding%3B INVOLVED IN: R splicing%2C posttranscriptional gene silencing by R%2C embryo development ending in seed dormancy%3B LOCATED IN: endomembrane system%3B EXPRESSED IN: 24 plant structures%3B EXPRESSED DURING: 13 gro…	scaffold_4	16770287	16777586	7300	+	scaffold_4	16770295	16770654	360	*	0.197557667190207	-0.0845728447650114	236.888493601892	0.383263888888889	3.5211441903696	0.0115902253789	8.8148	0.195694444444444	0.305138888888889	0.205333333333333	0.269274193548387	0.444444444444444	0.24875	NO	NO	NO	NO	NO	C	A	-1.83685613952842	-0.485608318338892	-3.00619228010981	0.0522328203164153	-1.19322343286389	0.289962661003159	-2.72793250375345	0.283597569888049	-1.35124782118953	-3.05842510042623
AL4G31370	AT1G32490	OG0000458	ESP3	protein_coding	R helicase family protein	ENHANCED SILENCING PHENOTYPE 3	ENHANCED SILENCING PHENOTYPE 3 (ESP3)%3B FUNCTIONS IN: helicase activity%2C ATP-dependent R helicase activity%2C ATP binding%2C ATP-dependent helicase activity%2C nucleic acid binding%3B INVOLVED IN: R splicing%2C posttranscriptional gene silencing by R%2C embryo development ending in seed dormancy%3B LOCATED IN: endomembrane system%3B EXPRESSED IN: 24 plant structures%3B EXPRESSED DURING: 13 gro…	Encodes a homolog of the yeast PRP2 protein%2C one of four related DEAH R helicases identified as essential cofactors for R splicing.	ENHANCED SILENCING PHENOTYPE 3 (ESP3)%3B FUNCTIONS IN: helicase activity%2C ATP-dependent R helicase activity%2C ATP binding%2C ATP-dependent helicase activity%2C nucleic acid binding%3B INVOLVED IN: R splicing%2C posttranscriptional gene silencing by R%2C embryo development ending in seed dormancy%3B LOCATED IN: endomembrane system%3B EXPRESSED IN: 24 plant structures%3B EXPRESSED DURING: 13 gro…	scaffold_4	16770287	16777586	7300	+	scaffold_4	16771341	16771806	466	*	0.179325288034517	-0.153010147909444	228.243536815697	0.344097222222222	3.49671398468364	0.0138753078716	19.6022	0.252777777777778	0.299444444444444	0.126539682539683	0.332903225806452	0.567777777777778	0.315	NO	NO	NO	NO	NO	C	A	-0.671641787129786	1.49622805597408	-4.53997912820369	0.540763316217001	-0.0280090804652543	2.27179903531613	-4.26171935184733	0.772128065788634	-2.16786984310387	-5.08074244442069
AL4G31370	AT1G32490	OG0000458	ESP3	protein_coding	R helicase family protein	ENHANCED SILENCING PHENOTYPE 3	ENHANCED SILENCING PHENOTYPE 3 (ESP3)%3B FUNCTIONS IN: helicase activity%2C ATP-dependent R helicase activity%2C ATP binding%2C ATP-dependent helicase activity%2C nucleic acid binding%3B INVOLVED IN: R splicing%2C posttranscriptional gene silencing by R%2C embryo development ending in seed dormancy%3B LOCATED IN: endomembrane system%3B EXPRESSED IN: 24 plant structures%3B EXPRESSED DURING: 13 gro…	Encodes a homolog of the yeast PRP2 protein%2C one of four related DEAH R helicases identified as essential cofactors for R splicing.	ENHANCED SILENCING PHENOTYPE 3 (ESP3)%3B FUNCTIONS IN: helicase activity%2C ATP-dependent R helicase activity%2C ATP binding%2C ATP-dependent helicase activity%2C nucleic acid binding%3B INVOLVED IN: R splicing%2C posttranscriptional gene silencing by R%2C embryo development ending in seed dormancy%3B LOCATED IN: endomembrane system%3B EXPRESSED IN: 24 plant structures%3B EXPRESSED DURING: 13 gro…	scaffold_4	16770287	16777586	7300	+	scaffold_4	16771341	16771806	466	*	0.179325288034517	-0.153010147909444	228.243536815697	0.344097222222222	3.49671398468364	0.0138753078716	19.6022	0.252777777777778	0.299444444444444	0.126539682539683	0.332903225806452	0.567777777777778	0.315	NO	NO	NO	NO	NO	C	A	-0.671641787129786	1.49622805597408	-4.53997912820369	0.540763316217001	-0.0280090804652543	2.27179903531613	-4.26171935184733	0.772128065788634	-2.16786984310387	-5.08074244442069
AL4G31370	AT1G32490	OG0000458	ESP3	protein_coding	R helicase family protein	ENHANCED SILENCING PHENOTYPE 3	ENHANCED SILENCING PHENOTYPE 3 (ESP3)%3B FUNCTIONS IN: helicase activity%2C ATP-dependent R helicase activity%2C ATP binding%2C ATP-dependent helicase activity%2C nucleic acid binding%3B INVOLVED IN: R splicing%2C posttranscriptional gene silencing by R%2C embryo development ending in seed dormancy%3B LOCATED IN: endomembrane system%3B EXPRESSED IN: 24 plant structures%3B EXPRESSED DURING: 13 gro…	Encodes a homolog of the yeast PRP2 protein%2C one of four related DEAH R helicases identified as essential cofactors for R splicing.	ENHANCED SILENCING PHENOTYPE 3 (ESP3)%3B FUNCTIONS IN: helicase activity%2C ATP-dependent R helicase activity%2C ATP binding%2C ATP-dependent helicase activity%2C nucleic acid binding%3B INVOLVED IN: R splicing%2C posttranscriptional gene silencing by R%2C embryo development ending in seed dormancy%3B LOCATED IN: endomembrane system%3B EXPRESSED IN: 24 plant structures%3B EXPRESSED DURING: 13 gro…	scaffold_4	16770287	16777586	7300	+	scaffold_4	16770694	16771317	624	*	0.148118942931923	-0.178089367093931	189.861928825148	0.247847222222222	3.62583632362396	0.00310677786879	14.3637	0.160277777777778	0.228611111111111	0.0643809523809524	0.251451612903226	0.377777777777778	0.2175	NO	NO	NO	NO	NO	C	A	-2.72803562965254	1.35573999915768	-6.43831170349214	0.0911513923168843	-2.08440292298801	2.13131097849973	-6.16005192713578	0.322516141888518	-4.08377562881022	-6.52946309580902
AL4G31370	AT1G32490	OG0000458	ESP3	protein_coding	R helicase family protein	ENHANCED SILENCING PHENOTYPE 3	ENHANCED SILENCING PHENOTYPE 3 (ESP3)%3B FUNCTIONS IN: helicase activity%2C ATP-dependent R helicase activity%2C ATP binding%2C ATP-dependent helicase activity%2C nucleic acid binding%3B INVOLVED IN: R splicing%2C posttranscriptional gene silencing by R%2C embryo development ending in seed dormancy%3B LOCATED IN: endomembrane system%3B EXPRESSED IN: 24 plant structures%3B EXPRESSED DURING: 13 gro…	Encodes a homolog of the yeast PRP2 protein%2C one of four related DEAH R helicases identified as essential cofactors for R splicing.	ENHANCED SILENCING PHENOTYPE 3 (ESP3)%3B FUNCTIONS IN: helicase activity%2C ATP-dependent R helicase activity%2C ATP binding%2C ATP-dependent helicase activity%2C nucleic acid binding%3B INVOLVED IN: R splicing%2C posttranscriptional gene silencing by R%2C embryo development ending in seed dormancy%3B LOCATED IN: endomembrane system%3B EXPRESSED IN: 24 plant structures%3B EXPRESSED DURING: 13 gro…	scaffold_4	16770287	16777586	7300	+	scaffold_4	16771341	16771806	466	*	0.179325288034517	-0.153010147909444	228.243536815697	0.344097222222222	3.49671398468364	0.0138753078716	19.6022	0.252777777777778	0.299444444444444	0.126539682539683	0.332903225806452	0.567777777777778	0.315	NO	NO	NO	NO	NO	C	A	-0.671641787129786	1.49622805597408	-4.53997912820369	0.540763316217001	-0.0280090804652543	2.27179903531613	-4.26171935184733	0.772128065788634	-2.16786984310387	-5.08074244442069
AL4G31370	AT1G32490	OG0000458	ESP3	protein_coding	R helicase family protein	ENHANCED SILENCING PHENOTYPE 3	ENHANCED SILENCING PHENOTYPE 3 (ESP3)%3B FUNCTIONS IN: helicase activity%2C ATP-dependent R helicase activity%2C ATP binding%2C ATP-dependent helicase activity%2C nucleic acid binding%3B INVOLVED IN: R splicing%2C posttranscriptional gene silencing by R%2C embryo development ending in seed dormancy%3B LOCATED IN: endomembrane system%3B EXPRESSED IN: 24 plant structures%3B EXPRESSED DURING: 13 gro…	Encodes a homolog of the yeast PRP2 protein%2C one of four related DEAH R helicases identified as essential cofactors for R splicing.	ENHANCED SILENCING PHENOTYPE 3 (ESP3)%3B FUNCTIONS IN: helicase activity%2C ATP-dependent R helicase activity%2C ATP binding%2C ATP-dependent helicase activity%2C nucleic acid binding%3B INVOLVED IN: R splicing%2C posttranscriptional gene silencing by R%2C embryo development ending in seed dormancy%3B LOCATED IN: endomembrane system%3B EXPRESSED IN: 24 plant structures%3B EXPRESSED DURING: 13 gro…	scaffold_4	16770287	16777586	7300	+	scaffold_4	16771341	16771806	466	*	0.179325288034517	-0.153010147909444	228.243536815697	0.344097222222222	3.49671398468364	0.0138753078716	19.6022	0.252777777777778	0.299444444444444	0.126539682539683	0.332903225806452	0.567777777777778	0.315	NO	NO	NO	NO	NO	C	A	-0.671641787129786	1.49622805597408	-4.53997912820369	0.540763316217001	-0.0280090804652543	2.27179903531613	-4.26171935184733	0.772128065788634	-2.16786984310387	-5.08074244442069
AL4G31370	AT1G32490	OG0000458	ESP3	protein_coding	R helicase family protein	ENHANCED SILENCING PHENOTYPE 3	ENHANCED SILENCING PHENOTYPE 3 (ESP3)%3B FUNCTIONS IN: helicase activity%2C ATP-dependent R helicase activity%2C ATP binding%2C ATP-dependent helicase activity%2C nucleic acid binding%3B INVOLVED IN: R splicing%2C posttranscriptional gene silencing by R%2C embryo development ending in seed dormancy%3B LOCATED IN: endomembrane system%3B EXPRESSED IN: 24 plant structures%3B EXPRESSED DURING: 13 gro…	Encodes a homolog of the yeast PRP2 protein%2C one of four related DEAH R helicases identified as essential cofactors for R splicing.	ENHANCED SILENCING PHENOTYPE 3 (ESP3)%3B FUNCTIONS IN: helicase activity%2C ATP-dependent R helicase activity%2C ATP binding%2C ATP-dependent helicase activity%2C nucleic acid binding%3B INVOLVED IN: R splicing%2C posttranscriptional gene silencing by R%2C embryo development ending in seed dormancy%3B LOCATED IN: endomembrane system%3B EXPRESSED IN: 24 plant structures%3B EXPRESSED DURING: 13 gro…	scaffold_4	16770287	16777586	7300	+	scaffold_4	16771819	16772230	412	*	0.133772744253559	-0.0337026140761163	253.436685202072	0.432361111111111	1.65029388695932	0.0138753078716	3.4284	0.172361111111111	0.307083333333333	0.262793650793651	0.39008064516129	0.481111111111111	0.30875	NO	NO	NO	NO	NO	C	A	-0.927558641981181	2.33233658828919	-3.22701566721947	0.595044482428176	-0.283925935316649	3.10790756763124	-2.94875589086311	0.826409231999809	-3.25989523027037	-3.82206014964765
AL4G31370	AT1G32490	OG0000458	ESP3	protein_coding	R helicase family protein	ENHANCED SILENCING PHENOTYPE 3	ENHANCED SILENCING PHENOTYPE 3 (ESP3)%3B FUNCTIONS IN: helicase activity%2C ATP-dependent R helicase activity%2C ATP binding%2C ATP-dependent helicase activity%2C nucleic acid binding%3B INVOLVED IN: R splicing%2C posttranscriptional gene silencing by R%2C embryo development ending in seed dormancy%3B LOCATED IN: endomembrane system%3B EXPRESSED IN: 24 plant structures%3B EXPRESSED DURING: 13 gro…	Encodes a homolog of the yeast PRP2 protein%2C one of four related DEAH R helicases identified as essential cofactors for R splicing.	ENHANCED SILENCING PHENOTYPE 3 (ESP3)%3B FUNCTIONS IN: helicase activity%2C ATP-dependent R helicase activity%2C ATP binding%2C ATP-dependent helicase activity%2C nucleic acid binding%3B INVOLVED IN: R splicing%2C posttranscriptional gene silencing by R%2C embryo development ending in seed dormancy%3B LOCATED IN: endomembrane system%3B EXPRESSED IN: 24 plant structures%3B EXPRESSED DURING: 13 gro…	scaffold_4	16770287	16777586	7300	+	scaffold_4	16771341	16771806	466	*	0.179325288034517	-0.153010147909444	228.243536815697	0.344097222222222	3.49671398468364	0.0138753078716	19.6022	0.252777777777778	0.299444444444444	0.126539682539683	0.332903225806452	0.567777777777778	0.315	NO	NO	NO	NO	NO	C	A	-0.671641787129786	1.49622805597408	-4.53997912820369	0.540763316217001	-0.0280090804652543	2.27179903531613	-4.26171935184733	0.772128065788634	-2.16786984310387	-5.08074244442069
AL4G31370	AT1G32490	OG0000458	ESP3	protein_coding	R helicase family protein	ENHANCED SILENCING PHENOTYPE 3	ENHANCED SILENCING PHENOTYPE 3 (ESP3)%3B FUNCTIONS IN: helicase activity%2C ATP-dependent R helicase activity%2C ATP binding%2C ATP-dependent helicase activity%2C nucleic acid binding%3B INVOLVED IN: R splicing%2C posttranscriptional gene silencing by R%2C embryo development ending in seed dormancy%3B LOCATED IN: endomembrane system%3B EXPRESSED IN: 24 plant structures%3B EXPRESSED DURING: 13 gro…	Encodes a homolog of the yeast PRP2 protein%2C one of four related DEAH R helicases identified as essential cofactors for R splicing.	ENHANCED SILENCING PHENOTYPE 3 (ESP3)%3B FUNCTIONS IN: helicase activity%2C ATP-dependent R helicase activity%2C ATP binding%2C ATP-dependent helicase activity%2C nucleic acid binding%3B INVOLVED IN: R splicing%2C posttranscriptional gene silencing by R%2C embryo development ending in seed dormancy%3B LOCATED IN: endomembrane system%3B EXPRESSED IN: 24 plant structures%3B EXPRESSED DURING: 13 gro…	scaffold_4	16770287	16777586	7300	+	scaffold_4	16771819	16772230	412	*	0.133772744253559	-0.0337026140761163	253.436685202072	0.432361111111111	1.65029388695932	0.0138753078716	3.4284	0.172361111111111	0.307083333333333	0.262793650793651	0.39008064516129	0.481111111111111	0.30875	NO	NO	NO	NO	NO	C	A	-0.927558641981181	2.33233658828919	-3.22701566721947	0.595044482428176	-0.283925935316649	3.10790756763124	-2.94875589086311	0.826409231999809	-3.25989523027037	-3.82206014964765
AL4G31370	AT1G32490	OG0000458	ESP3	protein_coding	R helicase family protein	ENHANCED SILENCING PHENOTYPE 3	ENHANCED SILENCING PHENOTYPE 3 (ESP3)%3B FUNCTIONS IN: helicase activity%2C ATP-dependent R helicase activity%2C ATP binding%2C ATP-dependent helicase activity%2C nucleic acid binding%3B INVOLVED IN: R splicing%2C posttranscriptional gene silencing by R%2C embryo development ending in seed dormancy%3B LOCATED IN: endomembrane system%3B EXPRESSED IN: 24 plant structures%3B EXPRESSED DURING: 13 gro…	Encodes a homolog of the yeast PRP2 protein%2C one of four related DEAH R helicases identified as essential cofactors for R splicing.	ENHANCED SILENCING PHENOTYPE 3 (ESP3)%3B FUNCTIONS IN: helicase activity%2C ATP-dependent R helicase activity%2C ATP binding%2C ATP-dependent helicase activity%2C nucleic acid binding%3B INVOLVED IN: R splicing%2C posttranscriptional gene silencing by R%2C embryo development ending in seed dormancy%3B LOCATED IN: endomembrane system%3B EXPRESSED IN: 24 plant structures%3B EXPRESSED DURING: 13 gro…	scaffold_4	16770287	16777586	7300	+	scaffold_4	16771341	16771806	466	*	0.179325288034517	-0.153010147909444	228.243536815697	0.344097222222222	3.49671398468364	0.0138753078716	19.6022	0.252777777777778	0.299444444444444	0.126539682539683	0.332903225806452	0.567777777777778	0.315	NO	NO	NO	NO	NO	C	A	-0.671641787129786	1.49622805597408	-4.53997912820369	0.540763316217001	-0.0280090804652543	2.27179903531613	-4.26171935184733	0.772128065788634	-2.16786984310387	-5.08074244442069
AL4G31370	AT1G32490	OG0000458	ESP3	protein_coding	R helicase family protein	ENHANCED SILENCING PHENOTYPE 3	ENHANCED SILENCING PHENOTYPE 3 (ESP3)%3B FUNCTIONS IN: helicase activity%2C ATP-dependent R helicase activity%2C ATP binding%2C ATP-dependent helicase activity%2C nucleic acid binding%3B INVOLVED IN: R splicing%2C posttranscriptional gene silencing by R%2C embryo development ending in seed dormancy%3B LOCATED IN: endomembrane system%3B EXPRESSED IN: 24 plant structures%3B EXPRESSED DURING: 13 gro…	Encodes a homolog of the yeast PRP2 protein%2C one of four related DEAH R helicases identified as essential cofactors for R splicing.	ENHANCED SILENCING PHENOTYPE 3 (ESP3)%3B FUNCTIONS IN: helicase activity%2C ATP-dependent R helicase activity%2C ATP binding%2C ATP-dependent helicase activity%2C nucleic acid binding%3B INVOLVED IN: R splicing%2C posttranscriptional gene silencing by R%2C embryo development ending in seed dormancy%3B LOCATED IN: endomembrane system%3B EXPRESSED IN: 24 plant structures%3B EXPRESSED DURING: 13 gro…	scaffold_4	16770287	16777586	7300	+	scaffold_4	16771341	16771806	466	*	0.179325288034517	-0.153010147909444	228.243536815697	0.344097222222222	3.49671398468364	0.0138753078716	19.6022	0.252777777777778	0.299444444444444	0.126539682539683	0.332903225806452	0.567777777777778	0.315	NO	NO	NO	NO	NO	C	A	-0.671641787129786	1.49622805597408	-4.53997912820369	0.540763316217001	-0.0280090804652543	2.27179903531613	-4.26171935184733	0.772128065788634	-2.16786984310387	-5.08074244442069
AL4G31370	AT1G32490	OG0000458	ESP3	protein_coding	R helicase family protein	ENHANCED SILENCING PHENOTYPE 3	ENHANCED SILENCING PHENOTYPE 3 (ESP3)%3B FUNCTIONS IN: helicase activity%2C ATP-dependent R helicase activity%2C ATP binding%2C ATP-dependent helicase activity%2C nucleic acid binding%3B INVOLVED IN: R splicing%2C posttranscriptional gene silencing by R%2C embryo development ending in seed dormancy%3B LOCATED IN: endomembrane system%3B EXPRESSED IN: 24 plant structures%3B EXPRESSED DURING: 13 gro…	Encodes a homolog of the yeast PRP2 protein%2C one of four related DEAH R helicases identified as essential cofactors for R splicing.	ENHANCED SILENCING PHENOTYPE 3 (ESP3)%3B FUNCTIONS IN: helicase activity%2C ATP-dependent R helicase activity%2C ATP binding%2C ATP-dependent helicase activity%2C nucleic acid binding%3B INVOLVED IN: R splicing%2C posttranscriptional gene silencing by R%2C embryo development ending in seed dormancy%3B LOCATED IN: endomembrane system%3B EXPRESSED IN: 24 plant structures%3B EXPRESSED DURING: 13 gro…	scaffold_4	16770287	16777586	7300	+	scaffold_4	16775411	16776795	1385	*	0.106538074168304	-0.161688343638753	142.431963730004	0.202916666666667	2.59746423269244	0.0138753078716	10.7086	-0.0770833333333333	0.169861111111111	0.0541587301587302	0.253306451612903	0.176666666666667	0.25375	NO	NO	NO	NO	NO	C	A	-2.2841444477864	-0.368307610705773	-0.0815923701523837	-0.8428943356943	-1.64051174112187	0.407263368636278	0.196667406203978	-0.611529586122667	-1.91583683708063	0.761301965541916
AL4G31370	AT1G32490	OG0000458	ESP3	protein_coding	R helicase family protein	ENHANCED SILENCING PHENOTYPE 3	ENHANCED SILENCING PHENOTYPE 3 (ESP3)%3B FUNCTIONS IN: helicase activity%2C ATP-dependent R helicase activity%2C ATP binding%2C ATP-dependent helicase activity%2C nucleic acid binding%3B INVOLVED IN: R splicing%2C posttranscriptional gene silencing by R%2C embryo development ending in seed dormancy%3B LOCATED IN: endomembrane system%3B EXPRESSED IN: 24 plant structures%3B EXPRESSED DURING: 13 gro…	Encodes a homolog of the yeast PRP2 protein%2C one of four related DEAH R helicases identified as essential cofactors for R splicing.	ENHANCED SILENCING PHENOTYPE 3 (ESP3)%3B FUNCTIONS IN: helicase activity%2C ATP-dependent R helicase activity%2C ATP binding%2C ATP-dependent helicase activity%2C nucleic acid binding%3B INVOLVED IN: R splicing%2C posttranscriptional gene silencing by R%2C embryo development ending in seed dormancy%3B LOCATED IN: endomembrane system%3B EXPRESSED IN: 24 plant structures%3B EXPRESSED DURING: 13 gro…	scaffold_4	16770287	16777586	7300	+	scaffold_4	16770295	16770654	360	*	0.197557667190207	-0.0845728447650114	236.888493601892	0.383263888888889	3.5211441903696	0.0115902253789	8.8148	0.195694444444444	0.305138888888889	0.205333333333333	0.269274193548387	0.444444444444444	0.24875	NO	NO	NO	NO	NO	C	A	-1.83685613952842	-0.485608318338892	-3.00619228010981	0.0522328203164153	-1.19322343286389	0.289962661003159	-2.72793250375345	0.283597569888049	-1.35124782118953	-3.05842510042623
AL4G31370	AT1G32490	OG0000458	ESP3	protein_coding	R helicase family protein	ENHANCED SILENCING PHENOTYPE 3	ENHANCED SILENCING PHENOTYPE 3 (ESP3)%3B FUNCTIONS IN: helicase activity%2C ATP-dependent R helicase activity%2C ATP binding%2C ATP-dependent helicase activity%2C nucleic acid binding%3B INVOLVED IN: R splicing%2C posttranscriptional gene silencing by R%2C embryo development ending in seed dormancy%3B LOCATED IN: endomembrane system%3B EXPRESSED IN: 24 plant structures%3B EXPRESSED DURING: 13 gro…	Encodes a homolog of the yeast PRP2 protein%2C one of four related DEAH R helicases identified as essential cofactors for R splicing.	ENHANCED SILENCING PHENOTYPE 3 (ESP3)%3B FUNCTIONS IN: helicase activity%2C ATP-dependent R helicase activity%2C ATP binding%2C ATP-dependent helicase activity%2C nucleic acid binding%3B INVOLVED IN: R splicing%2C posttranscriptional gene silencing by R%2C embryo development ending in seed dormancy%3B LOCATED IN: endomembrane system%3B EXPRESSED IN: 24 plant structures%3B EXPRESSED DURING: 13 gro…	scaffold_4	16770287	16777586	7300	+	scaffold_4	16770295	16770654	360	*	0.197557667190207	-0.0845728447650114	236.888493601892	0.383263888888889	3.5211441903696	0.0115902253789	8.8148	0.195694444444444	0.305138888888889	0.205333333333333	0.269274193548387	0.444444444444444	0.24875	NO	NO	NO	NO	NO	B	A	-1.83685613952842	-0.485608318338892	-3.00619228010981	0.0522328203164153	-1.19322343286389	0.289962661003159	-2.72793250375345	0.283597569888049	-1.35124782118953	-3.05842510042623
AL4G31370	AT1G32490	OG0000458	ESP3	protein_coding	R helicase family protein	ENHANCED SILENCING PHENOTYPE 3	ENHANCED SILENCING PHENOTYPE 3 (ESP3)%3B FUNCTIONS IN: helicase activity%2C ATP-dependent R helicase activity%2C ATP binding%2C ATP-dependent helicase activity%2C nucleic acid binding%3B INVOLVED IN: R splicing%2C posttranscriptional gene silencing by R%2C embryo development ending in seed dormancy%3B LOCATED IN: endomembrane system%3B EXPRESSED IN: 24 plant structures%3B EXPRESSED DURING: 13 gro…	Encodes a homolog of the yeast PRP2 protein%2C one of four related DEAH R helicases identified as essential cofactors for R splicing.	ENHANCED SILENCING PHENOTYPE 3 (ESP3)%3B FUNCTIONS IN: helicase activity%2C ATP-dependent R helicase activity%2C ATP binding%2C ATP-dependent helicase activity%2C nucleic acid binding%3B INVOLVED IN: R splicing%2C posttranscriptional gene silencing by R%2C embryo development ending in seed dormancy%3B LOCATED IN: endomembrane system%3B EXPRESSED IN: 24 plant structures%3B EXPRESSED DURING: 13 gro…	scaffold_4	16770287	16777586	7300	+	scaffold_4	16770295	16770654	360	*	0.197557667190207	-0.0845728447650114	236.888493601892	0.383263888888889	3.5211441903696	0.0115902253789	8.8148	0.195694444444444	0.305138888888889	0.205333333333333	0.269274193548387	0.444444444444444	0.24875	NO	NO	NO	NO	NO	C	A	-1.83685613952842	-0.485608318338892	-3.00619228010981	0.0522328203164153	-1.19322343286389	0.289962661003159	-2.72793250375345	0.283597569888049	-1.35124782118953	-3.05842510042623
AL4G31370	AT1G32490	OG0000458	ESP3	protein_coding	R helicase family protein	ENHANCED SILENCING PHENOTYPE 3	ENHANCED SILENCING PHENOTYPE 3 (ESP3)%3B FUNCTIONS IN: helicase activity%2C ATP-dependent R helicase activity%2C ATP binding%2C ATP-dependent helicase activity%2C nucleic acid binding%3B INVOLVED IN: R splicing%2C posttranscriptional gene silencing by R%2C embryo development ending in seed dormancy%3B LOCATED IN: endomembrane system%3B EXPRESSED IN: 24 plant structures%3B EXPRESSED DURING: 13 gro…	Encodes a homolog of the yeast PRP2 protein%2C one of four related DEAH R helicases identified as essential cofactors for R splicing.	ENHANCED SILENCING PHENOTYPE 3 (ESP3)%3B FUNCTIONS IN: helicase activity%2C ATP-dependent R helicase activity%2C ATP binding%2C ATP-dependent helicase activity%2C nucleic acid binding%3B INVOLVED IN: R splicing%2C posttranscriptional gene silencing by R%2C embryo development ending in seed dormancy%3B LOCATED IN: endomembrane system%3B EXPRESSED IN: 24 plant structures%3B EXPRESSED DURING: 13 gro…	scaffold_4	16770287	16777586	7300	+	scaffold_4	16770694	16771317	624	*	0.148118942931923	-0.178089367093931	189.861928825148	0.247847222222222	3.62583632362396	0.00310677786879	14.3637	0.160277777777778	0.228611111111111	0.0643809523809524	0.251451612903226	0.377777777777778	0.2175	NO	NO	NO	NO	NO	C	A	-2.72803562965254	1.35573999915768	-6.43831170349214	0.0911513923168843	-2.08440292298801	2.13131097849973	-6.16005192713578	0.322516141888518	-4.08377562881022	-6.52946309580902
AL4G31370	AT1G32490	OG0000458	ESP3	protein_coding	R helicase family protein	ENHANCED SILENCING PHENOTYPE 3	ENHANCED SILENCING PHENOTYPE 3 (ESP3)%3B FUNCTIONS IN: helicase activity%2C ATP-dependent R helicase activity%2C ATP binding%2C ATP-dependent helicase activity%2C nucleic acid binding%3B INVOLVED IN: R splicing%2C posttranscriptional gene silencing by R%2C embryo development ending in seed dormancy%3B LOCATED IN: endomembrane system%3B EXPRESSED IN: 24 plant structures%3B EXPRESSED DURING: 13 gro…	Encodes a homolog of the yeast PRP2 protein%2C one of four related DEAH R helicases identified as essential cofactors for R splicing.	ENHANCED SILENCING PHENOTYPE 3 (ESP3)%3B FUNCTIONS IN: helicase activity%2C ATP-dependent R helicase activity%2C ATP binding%2C ATP-dependent helicase activity%2C nucleic acid binding%3B INVOLVED IN: R splicing%2C posttranscriptional gene silencing by R%2C embryo development ending in seed dormancy%3B LOCATED IN: endomembrane system%3B EXPRESSED IN: 24 plant structures%3B EXPRESSED DURING: 13 gro…	scaffold_4	16770287	16777586	7300	+	scaffold_4	16770295	16770654	360	*	0.197557667190207	-0.0845728447650114	236.888493601892	0.383263888888889	3.5211441903696	0.0115902253789	8.8148	0.195694444444444	0.305138888888889	0.205333333333333	0.269274193548387	0.444444444444444	0.24875	NO	NO	NO	NO	NO	C	A	-1.83685613952842	-0.485608318338892	-3.00619228010981	0.0522328203164153	-1.19322343286389	0.289962661003159	-2.72793250375345	0.283597569888049	-1.35124782118953	-3.05842510042623
AL4G31370	AT1G32490	OG0000458	ESP3	protein_coding	R helicase family protein	ENHANCED SILENCING PHENOTYPE 3	ENHANCED SILENCING PHENOTYPE 3 (ESP3)%3B FUNCTIONS IN: helicase activity%2C ATP-dependent R helicase activity%2C ATP binding%2C ATP-dependent helicase activity%2C nucleic acid binding%3B INVOLVED IN: R splicing%2C posttranscriptional gene silencing by R%2C embryo development ending in seed dormancy%3B LOCATED IN: endomembrane system%3B EXPRESSED IN: 24 plant structures%3B EXPRESSED DURING: 13 gro…	Encodes a homolog of the yeast PRP2 protein%2C one of four related DEAH R helicases identified as essential cofactors for R splicing.	ENHANCED SILENCING PHENOTYPE 3 (ESP3)%3B FUNCTIONS IN: helicase activity%2C ATP-dependent R helicase activity%2C ATP binding%2C ATP-dependent helicase activity%2C nucleic acid binding%3B INVOLVED IN: R splicing%2C posttranscriptional gene silencing by R%2C embryo development ending in seed dormancy%3B LOCATED IN: endomembrane system%3B EXPRESSED IN: 24 plant structures%3B EXPRESSED DURING: 13 gro…	scaffold_4	16770287	16777586	7300	+	scaffold_4	16770295	16770654	360	*	0.197557667190207	-0.0845728447650114	236.888493601892	0.383263888888889	3.5211441903696	0.0115902253789	8.8148	0.195694444444444	0.305138888888889	0.205333333333333	0.269274193548387	0.444444444444444	0.24875	NO	NO	NO	NO	NO	C	A	-1.83685613952842	-0.485608318338892	-3.00619228010981	0.0522328203164153	-1.19322343286389	0.289962661003159	-2.72793250375345	0.283597569888049	-1.35124782118953	-3.05842510042623
AL4G31410	AT2G35360	OG0005811	.	protein_coding	ubiquitin family protein	.	ubiquitin family protein%3B CONTAINS InterPro DOMAIN/s: Ubiquitin (InterPro:IPR000626)%2C Ubiquitin supergroup (InterPro:IPR019955)%2C Domain of unknown function SAYSvFN (InterPro:IPR019387)%3B Has 81 Blast hits to 81 proteins in 37 species: Archae - 0%3B Bacteria - 0%3B Metazoa - 40%3B Fungi - 0%3B Plants - 33%3B Viruses - 0%3B Other Eukaryotes - 8 (source: NCBI BLink).	.	ubiquitin family protein%3B CONTAINS InterPro DOMAIN/s: Ubiquitin (InterPro:IPR000626)%2C Ubiquitin supergroup (InterPro:IPR019955)%2C Domain of unknown function SAYSvFN (InterPro:IPR019387)%3B Has 81 Blast hits to 81 proteins in 37 species: Archae - 0%3B Bacteria - 0%3B Metazoa - 40%3B Fungi - 0%3B Plants - 33%3B Viruses - 0%3B Other Eukaryotes - 8 (source: NCBI BLink).	scaffold_4	16800766	16802702	1937	-	scaffold_4	16801475	16801831	357	*	0.20073156434579	-0.0881726604857753	251.18814844288	0.390069444444444	3.66453819861838	0.00330949301573	18.5457	-0.279583333333333	0.330972222222222	0.21384126984127	0.301209677419355	0.306666666666667	0.58625	NO	NO	NO	0.0277777777777778	0.0625	C	B	-1.62057242591507	2.26550246417265	-1.36760789237067	0.299058500635156	-0.976939719250538	3.0410734435147	-1.08934811601431	0.530423250206789	-3.88607489008772	-1.66666639300583
AL4G32680	AT2G36490	OG0005890	DML1	protein_coding	demeter-like 1	demeter-like 1	demeter-like 1 (DML1)%3B FUNCTIONS IN: protein binding%2C D N-glycosylase activity%2C D-(apurinic or apyrimidinic site) lyase activity%3B INVOLVED IN: D repair%2C chromatin silencing%2C negative regulation of chromatin silencing%2C D methylation%2C D demethylation%3B LOCATED IN: nucleus%3B EXPRESSED IN: 21 plant structures%3B EXPRESSED DURING: 13 growth stages%3B CONTAINS InterPro DOMAIN/s: D gly…	A repressor of transcriptional gene silencing. Functions by demethylating the target promoter D. Interacts physically with RPA2/ROR1. In the ros1 mutants%2C an increase in methylation is observed in a number of gene promoters. Among the loci affected by ros1%2C a few (RD29A and At1g76930) are affected in cytosine methylation in all sequence contexts (CpG%2C CpNpG or CpNpN)%2C although many others…	demeter-like 1 (DML1)%3B FUNCTIONS IN: protein binding%2C D N-glycosylase activity%2C D-(apurinic or apyrimidinic site) lyase activity%3B INVOLVED IN: D repair%2C chromatin silencing%2C negative regulation of chromatin silencing%2C D methylation%2C D demethylation%3B LOCATED IN: nucleus%3B EXPRESSED IN: 21 plant structures%3B EXPRESSED DURING: 13 growth stages%3B CONTAINS InterPro DOMAIN/s: D gly…	scaffold_4	17351793	17358773	6981	-	scaffold_4	17357151	17357481	331	*	0.194680302617672	-0.218201994109289	224.37192939447	0.304930555555556	4.7844726464834	0.00678181000201	9.7733	-0.0315277777777778	0.280138888888889	0.0447619047619048	0.407661290322581	0.372222222222222	0.40375	NO	NO	NO	NO	NO	C	A	-3.3180032463675	2.46191295137227	-1.0210274576867	0.0204834589476076	-2.67437053970297	3.23748393071432	-0.742767681330338	0.251848208519241	-5.77991619773977	-1.04151091663431
AL4G33790	AT2G37400	OG0005945	.	protein_coding	Tetratricopeptide repeat (TPR)-like superfamily protein	.	Tetratricopeptide repeat (TPR)-like superfamily protein%3B FUNCTIONS IN: binding%3B INVOLVED IN: biological_process unknown%3B LOCATED IN: chloroplast thylakoid lumen%2C chloroplast envelope%3B EXPRESSED IN: 21 plant structures%3B EXPRESSED DURING: 12 growth stages%3B CONTAINS InterPro DOMAIN/s: Tetratricopeptide-like helical (InterPro:IPR011990)%2C Tetratricopeptide repeat-containing (InterPro:I…	.	Tetratricopeptide repeat (TPR)-like superfamily protein%3B FUNCTIONS IN: binding%3B INVOLVED IN: biological_process unknown%3B LOCATED IN: chloroplast thylakoid lumen%2C chloroplast envelope%3B EXPRESSED IN: 21 plant structures%3B EXPRESSED DURING: 12 growth stages%3B CONTAINS InterPro DOMAIN/s: Tetratricopeptide-like helical (InterPro:IPR011990)%2C Tetratricopeptide repeat-containing (InterPro:I…	scaffold_4	17900193	17901417	1225	-	scaffold_4	17901836	17902032	197	*	0.174691986364597	-0.0145908429657557	206.405008706334	0.299513888888889	4.15054001453376	0.00330949301573	10.7249	0.1175	0.266111111111111	0.264190476190476	0.106129032258065	0.27	0.1525	NO	NO	NO	0.0555555555555556	0	C	B	0.639649000117668	-2.05552825421929	0.126505601428921	0.397379103583703	1.2832817067822	-1.27995727487724	0.404765377785283	0.628743853155336	2.69517725433696	-0.270873502154782
AL4G33800	AT2G37410	OG0005946	TIM17-2	protein_coding	translocase inner membrane subunit 17-2	translocase inner membrane subunit 17-2	translocase inner membrane subunit 17-2 (TIM17-2)%3B FUNCTIONS IN: protein transporter activity%2C P-P-bond-hydrolysis-driven protein transmembrane transporter activity%3B INVOLVED IN: protein transport%2C protein import into mitochondrial inner membrane%3B LOCATED IN: mitochondrial outer membrane%2C mitochondrion%2C mitochondrial inner membrane%2C mitochondrial inner membrane presequence translo…	Mitochondrial inner membrane translocase. Together with AtTIM17-1%2C TIM17-2 has a long C-terminal extension not present in other TIMs. The extension is located in the outer membrane and so TIM17-2 links the inner and outer mitochondrial membranes. The C-terminal region is essential for protein import into mitochondria via the general import pathway but is not necessary for import via the carrier…	translocase inner membrane subunit 17-2 (TIM17-2)%3B FUNCTIONS IN: protein transporter activity%2C P-P-bond-hydrolysis-driven protein transmembrane transporter activity%3B INVOLVED IN: protein transport%2C protein import into mitochondrial inner membrane%3B LOCATED IN: mitochondrial outer membrane%2C mitochondrion%2C mitochondrial inner membrane%2C mitochondrial inner membrane presequence translo…	scaffold_4	17901908	17903407	1500	-	scaffold_4	17901836	17902032	197	*	0.174691986364597	-0.0145908429657557	206.405008706334	0.299513888888889	4.15054001453376	0.00330949301573	10.7249	0.1175	0.266111111111111	0.264190476190476	0.106129032258065	0.27	0.1525	NO	NO	NO	NO	NO	C	B	0.639649000117668	-2.05552825421929	0.126505601428921	0.397379103583703	1.2832817067822	-1.27995727487724	0.404765377785283	0.628743853155336	2.69517725433696	-0.270873502154782
AL4G35850	AT2G38570	OG0014311	.	protein_coding	hypothetical protein	.	CONTAINS InterPro DOMAIN/s: PRC-barrel-like (InterPro:IPR011033)%3B Has 300 Blast hits to 300 proteins in 81 species: Archae - 0%3B Bacteria - 135%3B Metazoa - 0%3B Fungi - 0%3B Plants - 37%3B Viruses - 0%3B Other Eukaryotes - 128 (source: NCBI BLink).	.	CONTAINS InterPro DOMAIN/s: PRC-barrel-like (InterPro:IPR011033)%3B Has 300 Blast hits to 300 proteins in 81 species: Archae - 0%3B Bacteria - 135%3B Metazoa - 0%3B Fungi - 0%3B Plants - 37%3B Viruses - 0%3B Other Eukaryotes - 128 (source: NCBI BLink).	scaffold_4	18726525	18728298	1774	-	scaffold_4	18726432	18726683	252	*	0.219378969350012	-0.163792438478793	271.597632440559	0.431805555555555	3.54220488361462	0.00670700074643	20.9773	-0.313333333333333	0.373888888888889	0.150603174603175	0.376612903225806	0.0866666666666667	0.4	NO	NO	NO	0.0277777777777778	0	C	B	-1.03060480920011	0.425518108392751	-0.559918283247545	-2.14769067065729	-0.386972102535578	1.2010890877348	-0.281658506891183	-1.91632592108566	-1.45612291759286	1.58777238740974
AL4G35850	AT2G38570	OG0014311	.	protein_coding	hypothetical protein	.	CONTAINS InterPro DOMAIN/s: PRC-barrel-like (InterPro:IPR011033)%3B Has 300 Blast hits to 300 proteins in 81 species: Archae - 0%3B Bacteria - 135%3B Metazoa - 0%3B Fungi - 0%3B Plants - 37%3B Viruses - 0%3B Other Eukaryotes - 128 (source: NCBI BLink).	.	CONTAINS InterPro DOMAIN/s: PRC-barrel-like (InterPro:IPR011033)%3B Has 300 Blast hits to 300 proteins in 81 species: Archae - 0%3B Bacteria - 135%3B Metazoa - 0%3B Fungi - 0%3B Plants - 37%3B Viruses - 0%3B Other Eukaryotes - 128 (source: NCBI BLink).	scaffold_4	18726525	18728298	1774	-	scaffold_4	18726432	18726683	252	*	0.219378969350012	-0.163792438478793	271.597632440559	0.431805555555555	3.54220488361462	0.00670700074643	20.9773	-0.313333333333333	0.373888888888889	0.150603174603175	0.376612903225806	0.0866666666666667	0.4	NO	NO	NO	0.0277777777777778	0	C	B	-1.03060480920011	0.425518108392751	-0.559918283247545	-2.14769067065729	-0.386972102535578	1.2010890877348	-0.281658506891183	-1.91632592108566	-1.45612291759286	1.58777238740974
AL4G35850	AT2G38570	OG0014311	.	protein_coding	hypothetical protein	.	CONTAINS InterPro DOMAIN/s: PRC-barrel-like (InterPro:IPR011033)%3B Has 300 Blast hits to 300 proteins in 81 species: Archae - 0%3B Bacteria - 135%3B Metazoa - 0%3B Fungi - 0%3B Plants - 37%3B Viruses - 0%3B Other Eukaryotes - 128 (source: NCBI BLink).	.	CONTAINS InterPro DOMAIN/s: PRC-barrel-like (InterPro:IPR011033)%3B Has 300 Blast hits to 300 proteins in 81 species: Archae - 0%3B Bacteria - 135%3B Metazoa - 0%3B Fungi - 0%3B Plants - 37%3B Viruses - 0%3B Other Eukaryotes - 128 (source: NCBI BLink).	scaffold_4	18726525	18728298	1774	-	scaffold_4	18726432	18726683	252	*	0.219378969350012	-0.163792438478793	271.597632440559	0.431805555555555	3.54220488361462	0.00670700074643	20.9773	-0.313333333333333	0.373888888888889	0.150603174603175	0.376612903225806	0.0866666666666667	0.4	NO	NO	NO	0.0277777777777778	0	B	B	-1.03060480920011	0.425518108392751	-0.559918283247545	-2.14769067065729	-0.386972102535578	1.2010890877348	-0.281658506891183	-1.91632592108566	-1.45612291759286	1.58777238740974
AL4G35850	AT2G38570	OG0014311	.	protein_coding	hypothetical protein	.	CONTAINS InterPro DOMAIN/s: PRC-barrel-like (InterPro:IPR011033)%3B Has 300 Blast hits to 300 proteins in 81 species: Archae - 0%3B Bacteria - 135%3B Metazoa - 0%3B Fungi - 0%3B Plants - 37%3B Viruses - 0%3B Other Eukaryotes - 128 (source: NCBI BLink).	.	CONTAINS InterPro DOMAIN/s: PRC-barrel-like (InterPro:IPR011033)%3B Has 300 Blast hits to 300 proteins in 81 species: Archae - 0%3B Bacteria - 135%3B Metazoa - 0%3B Fungi - 0%3B Plants - 37%3B Viruses - 0%3B Other Eukaryotes - 128 (source: NCBI BLink).	scaffold_4	18726525	18728298	1774	-	scaffold_4	18726432	18726683	252	*	0.219378969350012	-0.163792438478793	271.597632440559	0.431805555555555	3.54220488361462	0.00670700074643	20.9773	-0.313333333333333	0.373888888888889	0.150603174603175	0.376612903225806	0.0866666666666667	0.4	NO	NO	NO	0.0277777777777778	0	C	B	-1.03060480920011	0.425518108392751	-0.559918283247545	-2.14769067065729	-0.386972102535578	1.2010890877348	-0.281658506891183	-1.91632592108566	-1.45612291759286	1.58777238740974
AL4G35850	AT2G38570	OG0014311	.	protein_coding	hypothetical protein	.	CONTAINS InterPro DOMAIN/s: PRC-barrel-like (InterPro:IPR011033)%3B Has 300 Blast hits to 300 proteins in 81 species: Archae - 0%3B Bacteria - 135%3B Metazoa - 0%3B Fungi - 0%3B Plants - 37%3B Viruses - 0%3B Other Eukaryotes - 128 (source: NCBI BLink).	.	CONTAINS InterPro DOMAIN/s: PRC-barrel-like (InterPro:IPR011033)%3B Has 300 Blast hits to 300 proteins in 81 species: Archae - 0%3B Bacteria - 135%3B Metazoa - 0%3B Fungi - 0%3B Plants - 37%3B Viruses - 0%3B Other Eukaryotes - 128 (source: NCBI BLink).	scaffold_4	18726525	18728298	1774	-	scaffold_4	18726432	18726683	252	*	0.219378969350012	-0.163792438478793	271.597632440559	0.431805555555555	3.54220488361462	0.00670700074643	20.9773	-0.313333333333333	0.373888888888889	0.150603174603175	0.376612903225806	0.0866666666666667	0.4	NO	NO	NO	0.0277777777777778	0	B	B	-1.03060480920011	0.425518108392751	-0.559918283247545	-2.14769067065729	-0.386972102535578	1.2010890877348	-0.281658506891183	-1.91632592108566	-1.45612291759286	1.58777238740974
AL4G35850	AT2G38570	OG0014311	.	protein_coding	hypothetical protein	.	CONTAINS InterPro DOMAIN/s: PRC-barrel-like (InterPro:IPR011033)%3B Has 300 Blast hits to 300 proteins in 81 species: Archae - 0%3B Bacteria - 135%3B Metazoa - 0%3B Fungi - 0%3B Plants - 37%3B Viruses - 0%3B Other Eukaryotes - 128 (source: NCBI BLink).	.	CONTAINS InterPro DOMAIN/s: PRC-barrel-like (InterPro:IPR011033)%3B Has 300 Blast hits to 300 proteins in 81 species: Archae - 0%3B Bacteria - 135%3B Metazoa - 0%3B Fungi - 0%3B Plants - 37%3B Viruses - 0%3B Other Eukaryotes - 128 (source: NCBI BLink).	scaffold_4	18726525	18728298	1774	-	scaffold_4	18726432	18726683	252	*	0.219378969350012	-0.163792438478793	271.597632440559	0.431805555555555	3.54220488361462	0.00670700074643	20.9773	-0.313333333333333	0.373888888888889	0.150603174603175	0.376612903225806	0.0866666666666667	0.4	NO	MODERATE	NO	0.0277777777777778	0	C	B	-1.03060480920011	0.425518108392751	-0.559918283247545	-2.14769067065729	-0.386972102535578	1.2010890877348	-0.281658506891183	-1.91632592108566	-1.45612291759286	1.58777238740974
AL4G39130	AT2G41160	OG0017241	.	protein_coding	Ubiquitin-associated (UBA) protein	.	Ubiquitin-associated (UBA) protein%3B FUNCTIONS IN: molecular_function unknown%3B INVOLVED IN: biological_process unknown%3B LOCATED IN: endomembrane system%3B EXPRESSED IN: 23 plant structures%3B EXPRESSED DURING: 15 growth stages%3B CONTAINS InterPro DOMAIN/s: Der1-like (InterPro:IPR007599)%2C Ubiquitin-associated/translation elongation factor EF1B%2C N-terminal (InterPro:IPR000449)%2C Ubiquiti…	.	Ubiquitin-associated (UBA) protein%3B FUNCTIONS IN: molecular_function unknown%3B INVOLVED IN: biological_process unknown%3B LOCATED IN: endomembrane system%3B EXPRESSED IN: 23 plant structures%3B EXPRESSED DURING: 15 growth stages%3B CONTAINS InterPro DOMAIN/s: Der1-like (InterPro:IPR007599)%2C Ubiquitin-associated/translation elongation factor EF1B%2C N-terminal (InterPro:IPR000449)%2C Ubiquiti…	scaffold_4	20051355	20054166	2812	-	scaffold_4	20052710	20052971	262	*	0.182465998715156	-0.0778321288416041	213.417872480127	0.352222222222222	3.74324358306478	0.00670700074643	21.4032	-0.142638888888889	0.298194444444444	0.209460317460317	0.253467741935484	0.141111111111111	0.28375	NO	NO	NO	0	0.03125	C	B	-0.522168225889134	-0.589269408805356	0.786730101194077	0.171036882212575	0.121464480775398	0.186301570536695	1.06498987755044	0.402401631784208	0.067101182916222	0.615693218981502
AL4G39130	AT2G41160	OG0017241	.	protein_coding	Ubiquitin-associated (UBA) protein	.	Ubiquitin-associated (UBA) protein%3B FUNCTIONS IN: molecular_function unknown%3B INVOLVED IN: biological_process unknown%3B LOCATED IN: endomembrane system%3B EXPRESSED IN: 23 plant structures%3B EXPRESSED DURING: 15 growth stages%3B CONTAINS InterPro DOMAIN/s: Der1-like (InterPro:IPR007599)%2C Ubiquitin-associated/translation elongation factor EF1B%2C N-terminal (InterPro:IPR000449)%2C Ubiquiti…	.	Ubiquitin-associated (UBA) protein%3B FUNCTIONS IN: molecular_function unknown%3B INVOLVED IN: biological_process unknown%3B LOCATED IN: endomembrane system%3B EXPRESSED IN: 23 plant structures%3B EXPRESSED DURING: 15 growth stages%3B CONTAINS InterPro DOMAIN/s: Der1-like (InterPro:IPR007599)%2C Ubiquitin-associated/translation elongation factor EF1B%2C N-terminal (InterPro:IPR000449)%2C Ubiquiti…	scaffold_4	20051355	20054166	2812	-	scaffold_4	20052273	20052527	255	*	0.191438855460384	-0.0518635720608248	228.769352976969	0.398472222222222	3.69921553932307	0.00670700074643	18.5636	-0.154722222222222	0.323055555555556	0.250349206349206	0.28241935483871	0.167777777777778	0.3225	NO	NO	NO	0	0.03125	C	B	1.29755914466928	-0.403770615339034	1.08690019689229	-1.06616403822328	1.94119185133381	0.371800364003017	1.36515997324865	-0.834799288651647	1.70132976000831	2.15306423511557
AL4G39130	AT2G41160	OG0017241	.	protein_coding	Ubiquitin-associated (UBA) protein	.	Ubiquitin-associated (UBA) protein%3B FUNCTIONS IN: molecular_function unknown%3B INVOLVED IN: biological_process unknown%3B LOCATED IN: endomembrane system%3B EXPRESSED IN: 23 plant structures%3B EXPRESSED DURING: 15 growth stages%3B CONTAINS InterPro DOMAIN/s: Der1-like (InterPro:IPR007599)%2C Ubiquitin-associated/translation elongation factor EF1B%2C N-terminal (InterPro:IPR000449)%2C Ubiquiti…	.	Ubiquitin-associated (UBA) protein%3B FUNCTIONS IN: molecular_function unknown%3B INVOLVED IN: biological_process unknown%3B LOCATED IN: endomembrane system%3B EXPRESSED IN: 23 plant structures%3B EXPRESSED DURING: 15 growth stages%3B CONTAINS InterPro DOMAIN/s: Der1-like (InterPro:IPR007599)%2C Ubiquitin-associated/translation elongation factor EF1B%2C N-terminal (InterPro:IPR000449)%2C Ubiquiti…	scaffold_4	20051355	20054166	2812	-	scaffold_4	20052273	20052527	255	*	0.191438855460384	-0.0518635720608248	228.769352976969	0.398472222222222	3.69921553932307	0.00670700074643	18.5636	-0.154722222222222	0.323055555555556	0.250349206349206	0.28241935483871	0.167777777777778	0.3225	NO	NO	NO	0	0.03125	C	B	1.29755914466928	-0.403770615339034	1.08690019689229	-1.06616403822328	1.94119185133381	0.371800364003017	1.36515997324865	-0.834799288651647	1.70132976000831	2.15306423511557
AL4G39130	AT2G41160	OG0017241	.	protein_coding	Ubiquitin-associated (UBA) protein	.	Ubiquitin-associated (UBA) protein%3B FUNCTIONS IN: molecular_function unknown%3B INVOLVED IN: biological_process unknown%3B LOCATED IN: endomembrane system%3B EXPRESSED IN: 23 plant structures%3B EXPRESSED DURING: 15 growth stages%3B CONTAINS InterPro DOMAIN/s: Der1-like (InterPro:IPR007599)%2C Ubiquitin-associated/translation elongation factor EF1B%2C N-terminal (InterPro:IPR000449)%2C Ubiquiti…	.	Ubiquitin-associated (UBA) protein%3B FUNCTIONS IN: molecular_function unknown%3B INVOLVED IN: biological_process unknown%3B LOCATED IN: endomembrane system%3B EXPRESSED IN: 23 plant structures%3B EXPRESSED DURING: 15 growth stages%3B CONTAINS InterPro DOMAIN/s: Der1-like (InterPro:IPR007599)%2C Ubiquitin-associated/translation elongation factor EF1B%2C N-terminal (InterPro:IPR000449)%2C Ubiquiti…	scaffold_4	20051355	20054166	2812	-	scaffold_4	20052710	20052971	262	*	0.182465998715156	-0.0778321288416041	213.417872480127	0.352222222222222	3.74324358306478	0.00670700074643	21.4032	-0.142638888888889	0.298194444444444	0.209460317460317	0.253467741935484	0.141111111111111	0.28375	NO	NO	NO	0	0.03125	C	B	-0.522168225889134	-0.589269408805356	0.786730101194077	0.171036882212575	0.121464480775398	0.186301570536695	1.06498987755044	0.402401631784208	0.067101182916222	0.615693218981502
AL4G39130	AT2G41160	OG0017241	.	protein_coding	Ubiquitin-associated (UBA) protein	.	Ubiquitin-associated (UBA) protein%3B FUNCTIONS IN: molecular_function unknown%3B INVOLVED IN: biological_process unknown%3B LOCATED IN: endomembrane system%3B EXPRESSED IN: 23 plant structures%3B EXPRESSED DURING: 15 growth stages%3B CONTAINS InterPro DOMAIN/s: Der1-like (InterPro:IPR007599)%2C Ubiquitin-associated/translation elongation factor EF1B%2C N-terminal (InterPro:IPR000449)%2C Ubiquiti…	.	Ubiquitin-associated (UBA) protein%3B FUNCTIONS IN: molecular_function unknown%3B INVOLVED IN: biological_process unknown%3B LOCATED IN: endomembrane system%3B EXPRESSED IN: 23 plant structures%3B EXPRESSED DURING: 15 growth stages%3B CONTAINS InterPro DOMAIN/s: Der1-like (InterPro:IPR007599)%2C Ubiquitin-associated/translation elongation factor EF1B%2C N-terminal (InterPro:IPR000449)%2C Ubiquiti…	scaffold_4	20051355	20054166	2812	-	scaffold_4	20052273	20052527	255	*	0.191438855460384	-0.0518635720608248	228.769352976969	0.398472222222222	3.69921553932307	0.00670700074643	18.5636	-0.154722222222222	0.323055555555556	0.250349206349206	0.28241935483871	0.167777777777778	0.3225	NO	NO	NO	0	0.03125	C	B	1.29755914466928	-0.403770615339034	1.08690019689229	-1.06616403822328	1.94119185133381	0.371800364003017	1.36515997324865	-0.834799288651647	1.70132976000831	2.15306423511557
AL4G39130	AT2G41160	OG0017241	.	protein_coding	Ubiquitin-associated (UBA) protein	.	Ubiquitin-associated (UBA) protein%3B FUNCTIONS IN: molecular_function unknown%3B INVOLVED IN: biological_process unknown%3B LOCATED IN: endomembrane system%3B EXPRESSED IN: 23 plant structures%3B EXPRESSED DURING: 15 growth stages%3B CONTAINS InterPro DOMAIN/s: Der1-like (InterPro:IPR007599)%2C Ubiquitin-associated/translation elongation factor EF1B%2C N-terminal (InterPro:IPR000449)%2C Ubiquiti…	.	Ubiquitin-associated (UBA) protein%3B FUNCTIONS IN: molecular_function unknown%3B INVOLVED IN: biological_process unknown%3B LOCATED IN: endomembrane system%3B EXPRESSED IN: 23 plant structures%3B EXPRESSED DURING: 15 growth stages%3B CONTAINS InterPro DOMAIN/s: Der1-like (InterPro:IPR007599)%2C Ubiquitin-associated/translation elongation factor EF1B%2C N-terminal (InterPro:IPR000449)%2C Ubiquiti…	scaffold_4	20051355	20054166	2812	-	scaffold_4	20052710	20052971	262	*	0.182465998715156	-0.0778321288416041	213.417872480127	0.352222222222222	3.74324358306478	0.00670700074643	21.4032	-0.142638888888889	0.298194444444444	0.209460317460317	0.253467741935484	0.141111111111111	0.28375	NO	NO	NO	0	0.03125	C	B	-0.522168225889134	-0.589269408805356	0.786730101194077	0.171036882212575	0.121464480775398	0.186301570536695	1.06498987755044	0.402401631784208	0.067101182916222	0.615693218981502
AL4G43650	AT2G44610	OG0000212	RAB6A	protein_coding	Ras-related small GTP-binding family protein	.	RAB6A%3B FUNCTIONS IN: protein binding%2C GTP binding%3B INVOLVED IN: secretion by cell%3B LOCATED IN: plasma membrane%2C membrane fraction%3B EXPRESSED IN: 25 plant structures%3B EXPRESSED DURING: 15 growth stages%3B CONTAINS InterPro DOMAIN/s: Ras GTPase (InterPro:IPR001806)%2C Small GTP-binding protein (InterPro:IPR005225)%2C Small GTPase (InterPro:IPR020851)%2C Ras (InterPro:IPR013753)%2C Ras…	Encodes a GTP-binding protein with similarity to yeast YPT6 . RAB6 can complement the yeast YTP mutant.	RAB6A%3B FUNCTIONS IN: protein binding%2C GTP binding%3B INVOLVED IN: secretion by cell%3B LOCATED IN: plasma membrane%2C membrane fraction%3B EXPRESSED IN: 25 plant structures%3B EXPRESSED DURING: 15 growth stages%3B CONTAINS InterPro DOMAIN/s: Ras GTPase (InterPro:IPR001806)%2C Small GTP-binding protein (InterPro:IPR005225)%2C Small GTPase (InterPro:IPR020851)%2C Ras (InterPro:IPR013753)%2C Ras…	scaffold_4	21754637	21757274	2638	-	scaffold_4	21754462	21754704	243	*	0.117407675828163	-0.152849825454345	133.298515225337	0.171041666666667	2.68168558120056	7.0556554138E-4	5.7543	-0.116805555555556	0.16125	0.0598095238095238	0.149758064516129	0.144444444444444	0.26125	NO	NO	NO	NO	NO	C	B	-3.10285190821809	-1.33808439125396	-1.01354191914061	0.0839821816852163	-2.45921920155356	-0.562513411911909	-0.735282142784248	0.31534693125685	-1.76476751696413	-1.09752410082583
AL4G43650	AT2G44610	OG0000212	RAB6A	protein_coding	Ras-related small GTP-binding family protein	.	RAB6A%3B FUNCTIONS IN: protein binding%2C GTP binding%3B INVOLVED IN: secretion by cell%3B LOCATED IN: plasma membrane%2C membrane fraction%3B EXPRESSED IN: 25 plant structures%3B EXPRESSED DURING: 15 growth stages%3B CONTAINS InterPro DOMAIN/s: Ras GTPase (InterPro:IPR001806)%2C Small GTP-binding protein (InterPro:IPR005225)%2C Small GTPase (InterPro:IPR020851)%2C Ras (InterPro:IPR013753)%2C Ras…	Encodes a GTP-binding protein with similarity to yeast YPT6 . RAB6 can complement the yeast YTP mutant.	RAB6A%3B FUNCTIONS IN: protein binding%2C GTP binding%3B INVOLVED IN: secretion by cell%3B LOCATED IN: plasma membrane%2C membrane fraction%3B EXPRESSED IN: 25 plant structures%3B EXPRESSED DURING: 15 growth stages%3B CONTAINS InterPro DOMAIN/s: Ras GTPase (InterPro:IPR001806)%2C Small GTP-binding protein (InterPro:IPR005225)%2C Small GTPase (InterPro:IPR020851)%2C Ras (InterPro:IPR013753)%2C Ras…	scaffold_4	21754637	21757274	2638	-	scaffold_4	21754462	21754704	243	*	0.117407675828163	-0.152849825454345	133.298515225337	0.171041666666667	2.68168558120056	7.0556554138E-4	5.7543	-0.116805555555556	0.16125	0.0598095238095238	0.149758064516129	0.144444444444444	0.26125	NO	NO	NO	NO	NO	C	B	-3.10285190821809	-1.33808439125396	-1.01354191914061	0.0839821816852163	-2.45921920155356	-0.562513411911909	-0.735282142784248	0.31534693125685	-1.76476751696413	-1.09752410082583
AL4G43650	AT2G22290	OG0000212	RABH1d	protein_coding	RAB GTPase homolog H1D	RAB GTPase homolog H1D	RAB GTPase homolog H1D (RABH1d)%3B FUNCTIONS IN: GTP binding%3B INVOLVED IN: protein transport%2C small GTPase mediated signal transduction%3B LOCATED IN: mitochondrion%3B EXPRESSED IN: male gametophyte%2C flower%2C pollen tube%3B EXPRESSED DURING: L mature pollen stage%2C M germinated pollen stage%2C 4 anthesis%3B CONTAINS InterPro DOMAIN/s: Ras GTPase (InterPro:IPR001806)%2C Small GTP-binding p…	.	RAB GTPase homolog H1D (RABH1d)%3B FUNCTIONS IN: GTP binding%3B INVOLVED IN: protein transport%2C small GTPase mediated signal transduction%3B LOCATED IN: mitochondrion%3B EXPRESSED IN: male gametophyte%2C flower%2C pollen tube%3B EXPRESSED DURING: L mature pollen stage%2C M germinated pollen stage%2C 4 anthesis%3B CONTAINS InterPro DOMAIN/s: Ras GTPase (InterPro:IPR001806)%2C Small GTP-binding p…	scaffold_4	21754637	21757274	2638	-	scaffold_4	21754462	21754704	243	*	0.117407675828163	-0.152849825454345	133.298515225337	0.171041666666667	2.68168558120056	7.0556554138E-4	5.7543	-0.116805555555556	0.16125	0.0598095238095238	0.149758064516129	0.144444444444444	0.26125	NO	NO	NO	NO	NO	C	B	-3.10285190821809	-1.33808439125396	-1.01354191914061	0.0839821816852163	-2.45921920155356	-0.562513411911909	-0.735282142784248	0.31534693125685	-1.76476751696413	-1.09752410082583
AL4G43650	AT2G22290	OG0000212	RABH1d	protein_coding	RAB GTPase homolog H1D	RAB GTPase homolog H1D	RAB GTPase homolog H1D (RABH1d)%3B FUNCTIONS IN: GTP binding%3B INVOLVED IN: protein transport%2C small GTPase mediated signal transduction%3B LOCATED IN: mitochondrion%3B EXPRESSED IN: male gametophyte%2C flower%2C pollen tube%3B EXPRESSED DURING: L mature pollen stage%2C M germinated pollen stage%2C 4 anthesis%3B CONTAINS InterPro DOMAIN/s: Ras GTPase (InterPro:IPR001806)%2C Small GTP-binding p…	.	RAB GTPase homolog H1D (RABH1d)%3B FUNCTIONS IN: GTP binding%3B INVOLVED IN: protein transport%2C small GTPase mediated signal transduction%3B LOCATED IN: mitochondrion%3B EXPRESSED IN: male gametophyte%2C flower%2C pollen tube%3B EXPRESSED DURING: L mature pollen stage%2C M germinated pollen stage%2C 4 anthesis%3B CONTAINS InterPro DOMAIN/s: Ras GTPase (InterPro:IPR001806)%2C Small GTP-binding p…	scaffold_4	21754637	21757274	2638	-	scaffold_4	21754462	21754704	243	*	0.117407675828163	-0.152849825454345	133.298515225337	0.171041666666667	2.68168558120056	7.0556554138E-4	5.7543	-0.116805555555556	0.16125	0.0598095238095238	0.149758064516129	0.144444444444444	0.26125	NO	NO	NO	NO	NO	C	B	-3.10285190821809	-1.33808439125396	-1.01354191914061	0.0839821816852163	-2.45921920155356	-0.562513411911909	-0.735282142784248	0.31534693125685	-1.76476751696413	-1.09752410082583
AL4G43650	AT4G39890	OG0000212	RABH1c	protein_coding	RAB GTPase homolog H1C	RAB GTPase homolog H1C	RAB GTPase homolog H1C (RABH1c)%3B FUNCTIONS IN: protein binding%2C GTP binding%3B INVOLVED IN: protein transport%2C small GTPase mediated signal transduction%3B LOCATED IN: endomembrane system%3B EXPRESSED IN: 9 plant structures%3B EXPRESSED DURING: 6 growth stages%3B CONTAINS InterPro DOMAIN/s: Ras GTPase (InterPro:IPR001806)%2C Small GTP-binding protein (InterPro:IPR005225)%2C Small GTPase (In…	.	RAB GTPase homolog H1C (RABH1c)%3B FUNCTIONS IN: protein binding%2C GTP binding%3B INVOLVED IN: protein transport%2C small GTPase mediated signal transduction%3B LOCATED IN: endomembrane system%3B EXPRESSED IN: 9 plant structures%3B EXPRESSED DURING: 6 growth stages%3B CONTAINS InterPro DOMAIN/s: Ras GTPase (InterPro:IPR001806)%2C Small GTP-binding protein (InterPro:IPR005225)%2C Small GTPase (In…	scaffold_4	21754637	21757274	2638	-	scaffold_4	21754462	21754704	243	*	0.117407675828163	-0.152849825454345	133.298515225337	0.171041666666667	2.68168558120056	7.0556554138E-4	5.7543	-0.116805555555556	0.16125	0.0598095238095238	0.149758064516129	0.144444444444444	0.26125	NO	NO	NO	NO	NO	C	B	-3.10285190821809	-1.33808439125396	-1.01354191914061	0.0839821816852163	-2.45921920155356	-0.562513411911909	-0.735282142784248	0.31534693125685	-1.76476751696413	-1.09752410082583
AL4G43650	AT4G39890	OG0000212	RABH1c	protein_coding	RAB GTPase homolog H1C	RAB GTPase homolog H1C	RAB GTPase homolog H1C (RABH1c)%3B FUNCTIONS IN: protein binding%2C GTP binding%3B INVOLVED IN: protein transport%2C small GTPase mediated signal transduction%3B LOCATED IN: endomembrane system%3B EXPRESSED IN: 9 plant structures%3B EXPRESSED DURING: 6 growth stages%3B CONTAINS InterPro DOMAIN/s: Ras GTPase (InterPro:IPR001806)%2C Small GTP-binding protein (InterPro:IPR005225)%2C Small GTPase (In…	.	RAB GTPase homolog H1C (RABH1c)%3B FUNCTIONS IN: protein binding%2C GTP binding%3B INVOLVED IN: protein transport%2C small GTPase mediated signal transduction%3B LOCATED IN: endomembrane system%3B EXPRESSED IN: 9 plant structures%3B EXPRESSED DURING: 6 growth stages%3B CONTAINS InterPro DOMAIN/s: Ras GTPase (InterPro:IPR001806)%2C Small GTP-binding protein (InterPro:IPR005225)%2C Small GTPase (In…	scaffold_4	21754637	21757274	2638	-	scaffold_4	21754462	21754704	243	*	0.117407675828163	-0.152849825454345	133.298515225337	0.171041666666667	2.68168558120056	7.0556554138E-4	5.7543	-0.116805555555556	0.16125	0.0598095238095238	0.149758064516129	0.144444444444444	0.26125	NO	NO	NO	NO	NO	C	B	-3.10285190821809	-1.33808439125396	-1.01354191914061	0.0839821816852163	-2.45921920155356	-0.562513411911909	-0.735282142784248	0.31534693125685	-1.76476751696413	-1.09752410082583
AL4G43650	AT5G10260	OG0000212	RABH1e	protein_coding	RAB GTPase homolog H1E	RAB GTPase homolog H1E	RAB GTPase homolog H1E (RABH1e)%3B FUNCTIONS IN: GTP binding%3B INVOLVED IN: protein transport%2C small GTPase mediated signal transduction%3B EXPRESSED IN: 15 plant structures%3B EXPRESSED DURING: 6 growth stages%3B CONTAINS InterPro DOMAIN/s: Ras GTPase (InterPro:IPR001806)%2C Small GTP-binding protein (InterPro:IPR005225)%2C Small GTPase (InterPro:IPR020851)%2C Ras (InterPro:IPR013753)%2C Ras …	.	RAB GTPase homolog H1E (RABH1e)%3B FUNCTIONS IN: GTP binding%3B INVOLVED IN: protein transport%2C small GTPase mediated signal transduction%3B EXPRESSED IN: 15 plant structures%3B EXPRESSED DURING: 6 growth stages%3B CONTAINS InterPro DOMAIN/s: Ras GTPase (InterPro:IPR001806)%2C Small GTP-binding protein (InterPro:IPR005225)%2C Small GTPase (InterPro:IPR020851)%2C Ras (InterPro:IPR013753)%2C Ras …	scaffold_4	21754637	21757274	2638	-	scaffold_4	21754462	21754704	243	*	0.117407675828163	-0.152849825454345	133.298515225337	0.171041666666667	2.68168558120056	7.0556554138E-4	5.7543	-0.116805555555556	0.16125	0.0598095238095238	0.149758064516129	0.144444444444444	0.26125	NO	NO	NO	NO	NO	C	B	-3.10285190821809	-1.33808439125396	-1.01354191914061	0.0839821816852163	-2.45921920155356	-0.562513411911909	-0.735282142784248	0.31534693125685	-1.76476751696413	-1.09752410082583
AL4G43650	AT5G10260	OG0000212	RABH1e	protein_coding	RAB GTPase homolog H1E	RAB GTPase homolog H1E	RAB GTPase homolog H1E (RABH1e)%3B FUNCTIONS IN: GTP binding%3B INVOLVED IN: protein transport%2C small GTPase mediated signal transduction%3B EXPRESSED IN: 15 plant structures%3B EXPRESSED DURING: 6 growth stages%3B CONTAINS InterPro DOMAIN/s: Ras GTPase (InterPro:IPR001806)%2C Small GTP-binding protein (InterPro:IPR005225)%2C Small GTPase (InterPro:IPR020851)%2C Ras (InterPro:IPR013753)%2C Ras …	.	RAB GTPase homolog H1E (RABH1e)%3B FUNCTIONS IN: GTP binding%3B INVOLVED IN: protein transport%2C small GTPase mediated signal transduction%3B EXPRESSED IN: 15 plant structures%3B EXPRESSED DURING: 6 growth stages%3B CONTAINS InterPro DOMAIN/s: Ras GTPase (InterPro:IPR001806)%2C Small GTP-binding protein (InterPro:IPR005225)%2C Small GTPase (InterPro:IPR020851)%2C Ras (InterPro:IPR013753)%2C Ras …	scaffold_4	21754637	21757274	2638	-	scaffold_4	21754462	21754704	243	*	0.117407675828163	-0.152849825454345	133.298515225337	0.171041666666667	2.68168558120056	7.0556554138E-4	5.7543	-0.116805555555556	0.16125	0.0598095238095238	0.149758064516129	0.144444444444444	0.26125	NO	NO	NO	NO	NO	C	B	-3.10285190821809	-1.33808439125396	-1.01354191914061	0.0839821816852163	-2.45921920155356	-0.562513411911909	-0.735282142784248	0.31534693125685	-1.76476751696413	-1.09752410082583
AL5G18460	AT3G28740	OG0008820	CYP81D11	protein_coding	Cytochrome P450 superfamily protein	cytochrome P450%2C family 81%2C subfamily D%2C polypeptide 11	CYP81D1%3B FUNCTIONS IN: electron carrier activity%2C monooxygenase activity%2C iron ion binding%2C oxygen binding%2C heme binding%3B INVOLVED IN: response to cyclopentenone%2C defense response to insect%3B LOCATED IN: endomembrane system%3B EXPRESSED IN: 10 plant structures%3B EXPRESSED DURING: 4 anthesis%2C C globular stage%2C petal differentiation and expansion stage%3B CONTAINS InterPro DOMAI…	Encodes a member of the cytochrome p450 family. Expression is upregulated in response to cis-jasmonate treatment. Overexpression induces synthesis of volatile compounds that affect chemical ecology and insect interactions.	CYP81D1%3B FUNCTIONS IN: electron carrier activity%2C monooxygenase activity%2C iron ion binding%2C oxygen binding%2C heme binding%3B INVOLVED IN: response to cyclopentenone%2C defense response to insect%3B LOCATED IN: endomembrane system%3B EXPRESSED IN: 10 plant structures%3B EXPRESSED DURING: 4 anthesis%2C C globular stage%2C petal differentiation and expansion stage%3B CONTAINS InterPro DOMAI…	scaffold_5	4911363	4913807	2445	-	scaffold_5	4912399	4913516	1118	*	0.172324562855837	-0.0871637658002899	214.144614511092	0.344097222222222	3.7930347566164	0.00678181000201	6.8925	-0.0944444444444445	0.268333333333333	0.184634920634921	0.338548387096774	0.215555555555556	0.31	NO	NO	NO	NO	NO	C	A	-0.254927616398289	-1.62724427518676	0.0202109540744468	-0.100368948843312	0.388705090266243	-0.851673295844709	0.298470730430808	0.130995800728321	1.37231665878847	0.120579902917759
AL5G18460	AT3G28740	OG0008820	CYP81D11	protein_coding	Cytochrome P450 superfamily protein	cytochrome P450%2C family 81%2C subfamily D%2C polypeptide 11	CYP81D1%3B FUNCTIONS IN: electron carrier activity%2C monooxygenase activity%2C iron ion binding%2C oxygen binding%2C heme binding%3B INVOLVED IN: response to cyclopentenone%2C defense response to insect%3B LOCATED IN: endomembrane system%3B EXPRESSED IN: 10 plant structures%3B EXPRESSED DURING: 4 anthesis%2C C globular stage%2C petal differentiation and expansion stage%3B CONTAINS InterPro DOMAI…	Encodes a member of the cytochrome p450 family. Expression is upregulated in response to cis-jasmonate treatment. Overexpression induces synthesis of volatile compounds that affect chemical ecology and insect interactions.	CYP81D1%3B FUNCTIONS IN: electron carrier activity%2C monooxygenase activity%2C iron ion binding%2C oxygen binding%2C heme binding%3B INVOLVED IN: response to cyclopentenone%2C defense response to insect%3B LOCATED IN: endomembrane system%3B EXPRESSED IN: 10 plant structures%3B EXPRESSED DURING: 4 anthesis%2C C globular stage%2C petal differentiation and expansion stage%3B CONTAINS InterPro DOMAI…	scaffold_5	4911363	4913807	2445	-	scaffold_5	4912399	4913516	1118	*	0.172324562855837	-0.0871637658002899	214.144614511092	0.344097222222222	3.7930347566164	0.00678181000201	6.8925	-0.0944444444444445	0.268333333333333	0.184634920634921	0.338548387096774	0.215555555555556	0.31	NO	NO	NO	NO	NO	C	B	-0.254927616398289	-1.62724427518676	0.0202109540744468	-0.100368948843312	0.388705090266243	-0.851673295844709	0.298470730430808	0.130995800728321	1.37231665878847	0.120579902917759
AL5G26170	AT3G46950	OG0011278	.	protein_coding	Mitochondrial transcription termination factor family protein	.	Mitochondrial transcription termination factor family protein%3B CONTAINS InterPro DOMAIN/s: Mitochodrial transcription termination factor-related (InterPro:IPR003690)%3B BEST Arabidopsis thaliana protein match is: Mitochondrial transcription termination factor family protein (TAIR:AT1G61960.1)%3B Has 1049 Blast hits to 852 proteins in 58 species: Archae - 2%3B Bacteria - 13%3B Metazoa - 40%3B Fu…	.	Mitochondrial transcription termination factor family protein%3B CONTAINS InterPro DOMAIN/s: Mitochodrial transcription termination factor-related (InterPro:IPR003690)%3B BEST Arabidopsis thaliana protein match is: Mitochondrial transcription termination factor family protein (TAIR:AT1G61960.1)%3B Has 1049 Blast hits to 852 proteins in 58 species: Archae - 2%3B Bacteria - 13%3B Metazoa - 40%3B Fu…	scaffold_5	12987412	12989006	1595	+	scaffold_5	12988386	12988727	342	*	0.169437251943071	-0.0127929317500946	261.263257346409	0.442361111111111	2.3548994675008	0.0479327776759	7.7567	0.219027777777778	0.359027777777778	0.311174603174603	0.252338709677419	0.507777777777778	0.28875	NO	NO	NO	0.0277777777777778	0	B	B	2.15703212180297	0.649207829925668	-2.40061221173112	0.0194592860002311	2.8006648284675	1.42477880926772	-2.12235243537476	0.250824035571864	1.5078242918773	-2.42007149773135
AL5G26170	AT3G46950	OG0011278	.	protein_coding	Mitochondrial transcription termination factor family protein	.	Mitochondrial transcription termination factor family protein%3B CONTAINS InterPro DOMAIN/s: Mitochodrial transcription termination factor-related (InterPro:IPR003690)%3B BEST Arabidopsis thaliana protein match is: Mitochondrial transcription termination factor family protein (TAIR:AT1G61960.1)%3B Has 1049 Blast hits to 852 proteins in 58 species: Archae - 2%3B Bacteria - 13%3B Metazoa - 40%3B Fu…	.	Mitochondrial transcription termination factor family protein%3B CONTAINS InterPro DOMAIN/s: Mitochodrial transcription termination factor-related (InterPro:IPR003690)%3B BEST Arabidopsis thaliana protein match is: Mitochondrial transcription termination factor family protein (TAIR:AT1G61960.1)%3B Has 1049 Blast hits to 852 proteins in 58 species: Archae - 2%3B Bacteria - 13%3B Metazoa - 40%3B Fu…	scaffold_5	12987412	12989006	1595	+	scaffold_5	12988386	12988727	342	*	0.169437251943071	-0.0127929317500946	261.263257346409	0.442361111111111	2.3548994675008	0.0479327776759	7.7567	0.219027777777778	0.359027777777778	0.311174603174603	0.252338709677419	0.507777777777778	0.28875	NO	NO	NO	0.0277777777777778	0	C	B	2.15703212180297	0.649207829925668	-2.40061221173112	0.0194592860002311	2.8006648284675	1.42477880926772	-2.12235243537476	0.250824035571864	1.5078242918773	-2.42007149773135
AL5G26170	AT3G46950	OG0011278	.	protein_coding	Mitochondrial transcription termination factor family protein	.	Mitochondrial transcription termination factor family protein%3B CONTAINS InterPro DOMAIN/s: Mitochodrial transcription termination factor-related (InterPro:IPR003690)%3B BEST Arabidopsis thaliana protein match is: Mitochondrial transcription termination factor family protein (TAIR:AT1G61960.1)%3B Has 1049 Blast hits to 852 proteins in 58 species: Archae - 2%3B Bacteria - 13%3B Metazoa - 40%3B Fu…	.	Mitochondrial transcription termination factor family protein%3B CONTAINS InterPro DOMAIN/s: Mitochodrial transcription termination factor-related (InterPro:IPR003690)%3B BEST Arabidopsis thaliana protein match is: Mitochondrial transcription termination factor family protein (TAIR:AT1G61960.1)%3B Has 1049 Blast hits to 852 proteins in 58 species: Archae - 2%3B Bacteria - 13%3B Metazoa - 40%3B Fu…	scaffold_5	12987412	12989006	1595	+	scaffold_5	12988088	12988339	252	*	0.13924429638055	-8.09200871644414E-4	273.473883371866	0.444305555555556	2.03925876068048	0.0930687079612	10.9802	0.15375	0.331527777777778	0.311174603174603	0.311048387096774	0.45	0.29625	NO	NO	NO	0.0277777777777778	0	B	B	0.895565854969063	1.03111711059162	-1.45593724721454	0.339001245583001	1.53919856163359	1.80668808993367	-1.17767747085818	0.570365995154634	-0.135551255622557	-1.79493849279754
AL5G26170	AT3G46950	OG0011278	.	protein_coding	Mitochondrial transcription termination factor family protein	.	Mitochondrial transcription termination factor family protein%3B CONTAINS InterPro DOMAIN/s: Mitochodrial transcription termination factor-related (InterPro:IPR003690)%3B BEST Arabidopsis thaliana protein match is: Mitochondrial transcription termination factor family protein (TAIR:AT1G61960.1)%3B Has 1049 Blast hits to 852 proteins in 58 species: Archae - 2%3B Bacteria - 13%3B Metazoa - 40%3B Fu…	.	Mitochondrial transcription termination factor family protein%3B CONTAINS InterPro DOMAIN/s: Mitochodrial transcription termination factor-related (InterPro:IPR003690)%3B BEST Arabidopsis thaliana protein match is: Mitochondrial transcription termination factor family protein (TAIR:AT1G61960.1)%3B Has 1049 Blast hits to 852 proteins in 58 species: Archae - 2%3B Bacteria - 13%3B Metazoa - 40%3B Fu…	scaffold_5	12987412	12989006	1595	+	scaffold_5	12988386	12988727	342	*	0.169437251943071	-0.0127929317500946	261.263257346409	0.442361111111111	2.3548994675008	0.0479327776759	7.7567	0.219027777777778	0.359027777777778	0.311174603174603	0.252338709677419	0.507777777777778	0.28875	NO	MODERATE	NO	0.0277777777777778	0	B	B	2.15703212180297	0.649207829925668	-2.40061221173112	0.0194592860002311	2.8006648284675	1.42477880926772	-2.12235243537476	0.250824035571864	1.5078242918773	-2.42007149773135
AL5G26170	AT3G46950	OG0011278	.	protein_coding	Mitochondrial transcription termination factor family protein	.	Mitochondrial transcription termination factor family protein%3B CONTAINS InterPro DOMAIN/s: Mitochodrial transcription termination factor-related (InterPro:IPR003690)%3B BEST Arabidopsis thaliana protein match is: Mitochondrial transcription termination factor family protein (TAIR:AT1G61960.1)%3B Has 1049 Blast hits to 852 proteins in 58 species: Archae - 2%3B Bacteria - 13%3B Metazoa - 40%3B Fu…	.	Mitochondrial transcription termination factor family protein%3B CONTAINS InterPro DOMAIN/s: Mitochodrial transcription termination factor-related (InterPro:IPR003690)%3B BEST Arabidopsis thaliana protein match is: Mitochondrial transcription termination factor family protein (TAIR:AT1G61960.1)%3B Has 1049 Blast hits to 852 proteins in 58 species: Archae - 2%3B Bacteria - 13%3B Metazoa - 40%3B Fu…	scaffold_5	12987412	12989006	1595	+	scaffold_5	12988088	12988339	252	*	0.13924429638055	-8.09200871644414E-4	273.473883371866	0.444305555555556	2.03925876068048	0.0930687079612	10.9802	0.15375	0.331527777777778	0.311174603174603	0.311048387096774	0.45	0.29625	NO	MODERATE	NO	0.0277777777777778	0	B	B	0.895565854969063	1.03111711059162	-1.45593724721454	0.339001245583001	1.53919856163359	1.80668808993367	-1.17767747085818	0.570365995154634	-0.135551255622557	-1.79493849279754
AL5G26170	AT3G46950	OG0011278	.	protein_coding	Mitochondrial transcription termination factor family protein	.	Mitochondrial transcription termination factor family protein%3B CONTAINS InterPro DOMAIN/s: Mitochodrial transcription termination factor-related (InterPro:IPR003690)%3B BEST Arabidopsis thaliana protein match is: Mitochondrial transcription termination factor family protein (TAIR:AT1G61960.1)%3B Has 1049 Blast hits to 852 proteins in 58 species: Archae - 2%3B Bacteria - 13%3B Metazoa - 40%3B Fu…	.	Mitochondrial transcription termination factor family protein%3B CONTAINS InterPro DOMAIN/s: Mitochodrial transcription termination factor-related (InterPro:IPR003690)%3B BEST Arabidopsis thaliana protein match is: Mitochondrial transcription termination factor family protein (TAIR:AT1G61960.1)%3B Has 1049 Blast hits to 852 proteins in 58 species: Archae - 2%3B Bacteria - 13%3B Metazoa - 40%3B Fu…	scaffold_5	12987412	12989006	1595	+	scaffold_5	12988386	12988727	342	*	0.169437251943071	-0.0127929317500946	261.263257346409	0.442361111111111	2.3548994675008	0.0479327776759	7.7567	0.219027777777778	0.359027777777778	0.311174603174603	0.252338709677419	0.507777777777778	0.28875	NO	NO	NO	0.0277777777777778	0	B	B	2.15703212180297	0.649207829925668	-2.40061221173112	0.0194592860002311	2.8006648284675	1.42477880926772	-2.12235243537476	0.250824035571864	1.5078242918773	-2.42007149773135
AL5G26170	AT3G46950	OG0011278	.	protein_coding	Mitochondrial transcription termination factor family protein	.	Mitochondrial transcription termination factor family protein%3B CONTAINS InterPro DOMAIN/s: Mitochodrial transcription termination factor-related (InterPro:IPR003690)%3B BEST Arabidopsis thaliana protein match is: Mitochondrial transcription termination factor family protein (TAIR:AT1G61960.1)%3B Has 1049 Blast hits to 852 proteins in 58 species: Archae - 2%3B Bacteria - 13%3B Metazoa - 40%3B Fu…	.	Mitochondrial transcription termination factor family protein%3B CONTAINS InterPro DOMAIN/s: Mitochodrial transcription termination factor-related (InterPro:IPR003690)%3B BEST Arabidopsis thaliana protein match is: Mitochondrial transcription termination factor family protein (TAIR:AT1G61960.1)%3B Has 1049 Blast hits to 852 proteins in 58 species: Archae - 2%3B Bacteria - 13%3B Metazoa - 40%3B Fu…	scaffold_5	12987412	12989006	1595	+	scaffold_5	12988088	12988339	252	*	0.13924429638055	-8.09200871644414E-4	273.473883371866	0.444305555555556	2.03925876068048	0.0930687079612	10.9802	0.15375	0.331527777777778	0.311174603174603	0.311048387096774	0.45	0.29625	NO	NO	NO	0.0277777777777778	0	C	B	0.895565854969063	1.03111711059162	-1.45593724721454	0.339001245583001	1.53919856163359	1.80668808993367	-1.17767747085818	0.570365995154634	-0.135551255622557	-1.79493849279754
AL5G35540	AT3G54490	OG0010458	RPB5E	protein_coding	R polymerase II fifth largest subunit%2C E	R polymerase II fifth largest subunit%2C E	R polymerase II fifth largest subunit%2C E (RPB5E)%3B FUNCTIONS IN: D-directed R polymerase activity%2C D binding%3B INVOLVED IN: transcription%3B LOCATED IN: nucleus%3B CONTAINS InterPro DOMAIN/s: R polymerase%2C Rpb5%2C N-terminal (InterPro:IPR005571)%2C R polymerase%2C subunit H/Rpb5 C-terminal (InterPro:IPR000783)%2C D-directed R polymerase%2C RPB5 subunit (InterPro:IPR014381)%3B BEST Arabido…	NRPE5-like protein of unknown function%3B homologous to budding yeast RPB5	R polymerase II fifth largest subunit%2C E (RPB5E)%3B FUNCTIONS IN: D-directed R polymerase activity%2C D binding%3B INVOLVED IN: transcription%3B LOCATED IN: nucleus%3B CONTAINS InterPro DOMAIN/s: R polymerase%2C Rpb5%2C N-terminal (InterPro:IPR005571)%2C R polymerase%2C subunit H/Rpb5 C-terminal (InterPro:IPR000783)%2C D-directed R polymerase%2C RPB5 subunit (InterPro:IPR014381)%3B BEST Arabido…	scaffold_5	17042168	17043893	1726	+	scaffold_5	17040834	17041126	293	*	0.142026881503614	-0.187514619965086	193.673818533293	0.249375	3.54149375782836	0.00990392223561	10.2552	-0.00263888888888889	0.22375	0.0515555555555556	0.308306451612903	0.411111111111111	0.41375	NO	NO	NO	NO	NO	C	B	-2.33623371912783	-0.596089217388684	-0.385505235123647	-1.25973272527824	-1.6926010124633	0.17948176195336701	-0.107245458767285	-1.02836797570661	-1.74014450173915	0.874227490154593
AL5G35860	AT3G54780	OG0010478	.	protein_coding	Zinc finger (C3HC4-type RING finger) family protein	.	Zinc finger (C3HC4-type RING finger) family protein%3B FUNCTIONS IN: ubiquitin-protein ligase activity%2C zinc ion binding%3B CONTAINS InterPro DOMAIN/s: Zinc finger%2C RING-type (InterPro:IPR001841)%2C Zinc finger%2C C3HC4 RING-type (InterPro:IPR018957)%2C von Willebrand factor%2C type A (InterPro:IPR002035)%3B BEST Arabidopsis thaliana protein match is: Zinc finger (C3HC4-type RING finger) fami…	.	Zinc finger (C3HC4-type RING finger) family protein%3B FUNCTIONS IN: ubiquitin-protein ligase activity%2C zinc ion binding%3B CONTAINS InterPro DOMAIN/s: Zinc finger%2C RING-type (InterPro:IPR001841)%2C Zinc finger%2C C3HC4 RING-type (InterPro:IPR018957)%2C von Willebrand factor%2C type A (InterPro:IPR002035)%3B BEST Arabidopsis thaliana protein match is: Zinc finger (C3HC4-type RING finger) fami…	scaffold_5	17157145	17160004	2860	+	scaffold_5	17157097	17157406	310	*	0.175031618975144	-0.109272429544839	190.30155479669	0.300833333333333	3.54901726485267	8.35944986333E-5	4.7342	0.148194444444444	0.265694444444444	0.158793650793651	0.198306451612903	0.314444444444444	0.16625	NO	NO	NO	0.138888888888889	0	C	B	-1.54130614343896	-0.990274153504611	-0.614562714634001	0.00102417294738292	-0.897673436774428	-0.21470317416256	-0.336302938277639	0.232388922519016	-0.551031989934349	-0.615586887581384
AL5G35860	AT3G54780	OG0010478	.	protein_coding	Zinc finger (C3HC4-type RING finger) family protein	.	Zinc finger (C3HC4-type RING finger) family protein%3B FUNCTIONS IN: ubiquitin-protein ligase activity%2C zinc ion binding%3B CONTAINS InterPro DOMAIN/s: Zinc finger%2C RING-type (InterPro:IPR001841)%2C Zinc finger%2C C3HC4 RING-type (InterPro:IPR018957)%2C von Willebrand factor%2C type A (InterPro:IPR002035)%3B BEST Arabidopsis thaliana protein match is: Zinc finger (C3HC4-type RING finger) fami…	.	Zinc finger (C3HC4-type RING finger) family protein%3B FUNCTIONS IN: ubiquitin-protein ligase activity%2C zinc ion binding%3B CONTAINS InterPro DOMAIN/s: Zinc finger%2C RING-type (InterPro:IPR001841)%2C Zinc finger%2C C3HC4 RING-type (InterPro:IPR018957)%2C von Willebrand factor%2C type A (InterPro:IPR002035)%3B BEST Arabidopsis thaliana protein match is: Zinc finger (C3HC4-type RING finger) fami…	scaffold_5	17157145	17160004	2860	+	scaffold_5	17157097	17157406	310	*	0.175031618975144	-0.109272429544839	190.30155479669	0.300833333333333	3.54901726485267	8.35944986333E-5	4.7342	0.148194444444444	0.265694444444444	0.158793650793651	0.198306451612903	0.314444444444444	0.16625	NO	NO	NO	0.138888888888889	0	C	B	-1.54130614343896	-0.990274153504611	-0.614562714634001	0.00102417294738292	-0.897673436774428	-0.21470317416256	-0.336302938277639	0.232388922519016	-0.551031989934349	-0.615586887581384
AL5G39460	AT3G57790	OG0013351	.	protein_coding	Pectin lyase-like superfamily protein	.	Pectin lyase-like superfamily protein%3B FUNCTIONS IN: polygalacturonase activity%3B INVOLVED IN: carbohydrate metabolic process%3B LOCATED IN: plasma membrane%3B EXPRESSED IN: 23 plant structures%3B EXPRESSED DURING: 14 growth stages%3B CONTAINS InterPro DOMAIN/s: Pectin lyase fold/virulence factor (InterPro:IPR011050)%2C Pectin lyase fold (InterPro:IPR012334)%2C Glycoside hydrolase%2C family 28…	.	Pectin lyase-like superfamily protein%3B FUNCTIONS IN: polygalacturonase activity%3B INVOLVED IN: carbohydrate metabolic process%3B LOCATED IN: plasma membrane%3B EXPRESSED IN: 23 plant structures%3B EXPRESSED DURING: 14 growth stages%3B CONTAINS InterPro DOMAIN/s: Pectin lyase fold/virulence factor (InterPro:IPR011050)%2C Pectin lyase fold (InterPro:IPR012334)%2C Glycoside hydrolase%2C family 28…	scaffold_5	18591492	18594456	2965	-	scaffold_5	18594738	18595281	544	*	0.213050999010429	-0.148500553959647	257.476740083188	0.442361111111111	4.10770436155988	0.00235781859925	29.1612	-0.368055555555556	0.3725	0.166920634920635	0.354354838709677	0.0944444444444444	0.4625	NO	NO	NO	NO	NO	C	B	-1.32389005436167	0.353228137409554	0.82266068621531	-0.186399476423281	-0.680257347697138	1.12879911675161	1.10092046257167	0.0449652731483522	-1.67711819177122	1.00906016263859
AL5G39460	AT3G57790	OG0013351	.	protein_coding	Pectin lyase-like superfamily protein	.	Pectin lyase-like superfamily protein%3B FUNCTIONS IN: polygalacturonase activity%3B INVOLVED IN: carbohydrate metabolic process%3B LOCATED IN: plasma membrane%3B EXPRESSED IN: 23 plant structures%3B EXPRESSED DURING: 14 growth stages%3B CONTAINS InterPro DOMAIN/s: Pectin lyase fold/virulence factor (InterPro:IPR011050)%2C Pectin lyase fold (InterPro:IPR012334)%2C Glycoside hydrolase%2C family 28…	.	Pectin lyase-like superfamily protein%3B FUNCTIONS IN: polygalacturonase activity%3B INVOLVED IN: carbohydrate metabolic process%3B LOCATED IN: plasma membrane%3B EXPRESSED IN: 23 plant structures%3B EXPRESSED DURING: 14 growth stages%3B CONTAINS InterPro DOMAIN/s: Pectin lyase fold/virulence factor (InterPro:IPR011050)%2C Pectin lyase fold (InterPro:IPR012334)%2C Glycoside hydrolase%2C family 28…	scaffold_5	18591492	18594456	2965	-	scaffold_5	18594738	18595281	544	*	0.213050999010429	-0.148500553959647	257.476740083188	0.442361111111111	4.10770436155988	0.00235781859925	29.1612	-0.368055555555556	0.3725	0.166920634920635	0.354354838709677	0.0944444444444444	0.4625	NO	MODERATE	NO	NO	NO	C	B	-1.32389005436167	0.353228137409554	0.82266068621531	-0.186399476423281	-0.680257347697138	1.12879911675161	1.10092046257167	0.0449652731483522	-1.67711819177122	1.00906016263859
AL5G39460	AT3G57790	OG0013351	.	protein_coding	Pectin lyase-like superfamily protein	.	Pectin lyase-like superfamily protein%3B FUNCTIONS IN: polygalacturonase activity%3B INVOLVED IN: carbohydrate metabolic process%3B LOCATED IN: plasma membrane%3B EXPRESSED IN: 23 plant structures%3B EXPRESSED DURING: 14 growth stages%3B CONTAINS InterPro DOMAIN/s: Pectin lyase fold/virulence factor (InterPro:IPR011050)%2C Pectin lyase fold (InterPro:IPR012334)%2C Glycoside hydrolase%2C family 28…	.	Pectin lyase-like superfamily protein%3B FUNCTIONS IN: polygalacturonase activity%3B INVOLVED IN: carbohydrate metabolic process%3B LOCATED IN: plasma membrane%3B EXPRESSED IN: 23 plant structures%3B EXPRESSED DURING: 14 growth stages%3B CONTAINS InterPro DOMAIN/s: Pectin lyase fold/virulence factor (InterPro:IPR011050)%2C Pectin lyase fold (InterPro:IPR012334)%2C Glycoside hydrolase%2C family 28…	scaffold_5	18591492	18594456	2965	-	scaffold_5	18594738	18595281	544	*	0.213050999010429	-0.148500553959647	257.476740083188	0.442361111111111	4.10770436155988	0.00235781859925	29.1612	-0.368055555555556	0.3725	0.166920634920635	0.354354838709677	0.0944444444444444	0.4625	NO	NO	NO	NO	NO	C	B	-1.32389005436167	0.353228137409554	0.82266068621531	-0.186399476423281	-0.680257347697138	1.12879911675161	1.10092046257167	0.0449652731483522	-1.67711819177122	1.00906016263859
AL5G39460	AT3G57790	OG0013351	.	protein_coding	Pectin lyase-like superfamily protein	.	Pectin lyase-like superfamily protein%3B FUNCTIONS IN: polygalacturonase activity%3B INVOLVED IN: carbohydrate metabolic process%3B LOCATED IN: plasma membrane%3B EXPRESSED IN: 23 plant structures%3B EXPRESSED DURING: 14 growth stages%3B CONTAINS InterPro DOMAIN/s: Pectin lyase fold/virulence factor (InterPro:IPR011050)%2C Pectin lyase fold (InterPro:IPR012334)%2C Glycoside hydrolase%2C family 28…	.	Pectin lyase-like superfamily protein%3B FUNCTIONS IN: polygalacturonase activity%3B INVOLVED IN: carbohydrate metabolic process%3B LOCATED IN: plasma membrane%3B EXPRESSED IN: 23 plant structures%3B EXPRESSED DURING: 14 growth stages%3B CONTAINS InterPro DOMAIN/s: Pectin lyase fold/virulence factor (InterPro:IPR011050)%2C Pectin lyase fold (InterPro:IPR012334)%2C Glycoside hydrolase%2C family 28…	scaffold_5	18591492	18594456	2965	-	scaffold_5	18594738	18595281	544	*	0.213050999010429	-0.148500553959647	257.476740083188	0.442361111111111	4.10770436155988	0.00235781859925	29.1612	-0.368055555555556	0.3725	0.166920634920635	0.354354838709677	0.0944444444444444	0.4625	NO	NO	NO	NO	NO	C	B	-1.32389005436167	0.353228137409554	0.82266068621531	-0.186399476423281	-0.680257347697138	1.12879911675161	1.10092046257167	0.0449652731483522	-1.67711819177122	1.00906016263859
AL5G39460	AT3G57790	OG0013351	.	protein_coding	Pectin lyase-like superfamily protein	.	Pectin lyase-like superfamily protein%3B FUNCTIONS IN: polygalacturonase activity%3B INVOLVED IN: carbohydrate metabolic process%3B LOCATED IN: plasma membrane%3B EXPRESSED IN: 23 plant structures%3B EXPRESSED DURING: 14 growth stages%3B CONTAINS InterPro DOMAIN/s: Pectin lyase fold/virulence factor (InterPro:IPR011050)%2C Pectin lyase fold (InterPro:IPR012334)%2C Glycoside hydrolase%2C family 28…	.	Pectin lyase-like superfamily protein%3B FUNCTIONS IN: polygalacturonase activity%3B INVOLVED IN: carbohydrate metabolic process%3B LOCATED IN: plasma membrane%3B EXPRESSED IN: 23 plant structures%3B EXPRESSED DURING: 14 growth stages%3B CONTAINS InterPro DOMAIN/s: Pectin lyase fold/virulence factor (InterPro:IPR011050)%2C Pectin lyase fold (InterPro:IPR012334)%2C Glycoside hydrolase%2C family 28…	scaffold_5	18591492	18594456	2965	-	scaffold_5	18594738	18595281	544	*	0.213050999010429	-0.148500553959647	257.476740083188	0.442361111111111	4.10770436155988	0.00235781859925	29.1612	-0.368055555555556	0.3725	0.166920634920635	0.354354838709677	0.0944444444444444	0.4625	NO	NO	NO	NO	NO	C	B	-1.32389005436167	0.353228137409554	0.82266068621531	-0.186399476423281	-0.680257347697138	1.12879911675161	1.10092046257167	0.0449652731483522	-1.67711819177122	1.00906016263859
AL5G39460	AT3G57790	OG0013351	.	protein_coding	Pectin lyase-like superfamily protein	.	Pectin lyase-like superfamily protein%3B FUNCTIONS IN: polygalacturonase activity%3B INVOLVED IN: carbohydrate metabolic process%3B LOCATED IN: plasma membrane%3B EXPRESSED IN: 23 plant structures%3B EXPRESSED DURING: 14 growth stages%3B CONTAINS InterPro DOMAIN/s: Pectin lyase fold/virulence factor (InterPro:IPR011050)%2C Pectin lyase fold (InterPro:IPR012334)%2C Glycoside hydrolase%2C family 28…	.	Pectin lyase-like superfamily protein%3B FUNCTIONS IN: polygalacturonase activity%3B INVOLVED IN: carbohydrate metabolic process%3B LOCATED IN: plasma membrane%3B EXPRESSED IN: 23 plant structures%3B EXPRESSED DURING: 14 growth stages%3B CONTAINS InterPro DOMAIN/s: Pectin lyase fold/virulence factor (InterPro:IPR011050)%2C Pectin lyase fold (InterPro:IPR012334)%2C Glycoside hydrolase%2C family 28…	scaffold_5	18591492	18594456	2965	-	scaffold_5	18594329	18594734	406	*	0.157010067397692	-0.0865848640612864	194.710276968754	0.360347222222222	3.46120621599132	0.00678181000201	10.7659	-0.263194444444444	0.291527777777778	0.196507936507936	0.287983870967742	0.125555555555556	0.38875	NO	NO	NO	NO	NO	C	B	-0.796203088163636	2.05954424495636	0.79421563974017	-1.7072963032836	-0.152570381499104	2.83511522429841	1.07247541609653	-1.47593155371197	-2.85574733312	2.50151194302377
AL5G39460	AT3G57790	OG0013351	.	protein_coding	Pectin lyase-like superfamily protein	.	Pectin lyase-like superfamily protein%3B FUNCTIONS IN: polygalacturonase activity%3B INVOLVED IN: carbohydrate metabolic process%3B LOCATED IN: plasma membrane%3B EXPRESSED IN: 23 plant structures%3B EXPRESSED DURING: 14 growth stages%3B CONTAINS InterPro DOMAIN/s: Pectin lyase fold/virulence factor (InterPro:IPR011050)%2C Pectin lyase fold (InterPro:IPR012334)%2C Glycoside hydrolase%2C family 28…	.	Pectin lyase-like superfamily protein%3B FUNCTIONS IN: polygalacturonase activity%3B INVOLVED IN: carbohydrate metabolic process%3B LOCATED IN: plasma membrane%3B EXPRESSED IN: 23 plant structures%3B EXPRESSED DURING: 14 growth stages%3B CONTAINS InterPro DOMAIN/s: Pectin lyase fold/virulence factor (InterPro:IPR011050)%2C Pectin lyase fold (InterPro:IPR012334)%2C Glycoside hydrolase%2C family 28…	scaffold_5	18591492	18594456	2965	-	scaffold_5	18594329	18594734	406	*	0.157010067397692	-0.0865848640612864	194.710276968754	0.360347222222222	3.46120621599132	0.00678181000201	10.7659	-0.263194444444444	0.291527777777778	0.196507936507936	0.287983870967742	0.125555555555556	0.38875	NO	NO	NO	NO	NO	C	B	-0.796203088163636	2.05954424495636	0.79421563974017	-1.7072963032836	-0.152570381499104	2.83511522429841	1.07247541609653	-1.47593155371197	-2.85574733312	2.50151194302377
AL5G39460	AT3G57790	OG0013351	.	protein_coding	Pectin lyase-like superfamily protein	.	Pectin lyase-like superfamily protein%3B FUNCTIONS IN: polygalacturonase activity%3B INVOLVED IN: carbohydrate metabolic process%3B LOCATED IN: plasma membrane%3B EXPRESSED IN: 23 plant structures%3B EXPRESSED DURING: 14 growth stages%3B CONTAINS InterPro DOMAIN/s: Pectin lyase fold/virulence factor (InterPro:IPR011050)%2C Pectin lyase fold (InterPro:IPR012334)%2C Glycoside hydrolase%2C family 28…	.	Pectin lyase-like superfamily protein%3B FUNCTIONS IN: polygalacturonase activity%3B INVOLVED IN: carbohydrate metabolic process%3B LOCATED IN: plasma membrane%3B EXPRESSED IN: 23 plant structures%3B EXPRESSED DURING: 14 growth stages%3B CONTAINS InterPro DOMAIN/s: Pectin lyase fold/virulence factor (InterPro:IPR011050)%2C Pectin lyase fold (InterPro:IPR012334)%2C Glycoside hydrolase%2C family 28…	scaffold_5	18591492	18594456	2965	-	scaffold_5	18594738	18595281	544	*	0.213050999010429	-0.148500553959647	257.476740083188	0.442361111111111	4.10770436155988	0.00235781859925	29.1612	-0.368055555555556	0.3725	0.166920634920635	0.354354838709677	0.0944444444444444	0.4625	NO	NO	NO	NO	NO	C	B	-1.32389005436167	0.353228137409554	0.82266068621531	-0.186399476423281	-0.680257347697138	1.12879911675161	1.10092046257167	0.0449652731483522	-1.67711819177122	1.00906016263859
AL5G39470	AT3G57800	OG0013350	.	protein_coding	basic helix-loop-helix (bHLH) D-binding superfamily protein	.	basic helix-loop-helix (bHLH) D-binding superfamily protein%3B FUNCTIONS IN: D binding%2C sequence-specific D binding transcription factor activity%3B INVOLVED IN: regulation of transcription%3B LOCATED IN: nucleus%3B EXPRESSED IN: 21 plant structures%3B EXPRESSED DURING: 13 growth stages%3B CONTAINS InterPro DOMAIN/s: Helix-loop-helix D-binding domain (InterPro:IPR001092)%2C Helix-loop-helix D-b…	.	basic helix-loop-helix (bHLH) D-binding superfamily protein%3B FUNCTIONS IN: D binding%2C sequence-specific D binding transcription factor activity%3B INVOLVED IN: regulation of transcription%3B LOCATED IN: nucleus%3B EXPRESSED IN: 21 plant structures%3B EXPRESSED DURING: 13 growth stages%3B CONTAINS InterPro DOMAIN/s: Helix-loop-helix D-binding domain (InterPro:IPR001092)%2C Helix-loop-helix D-b…	scaffold_5	18594981	18598896	3916	-	scaffold_5	18594738	18595281	544	*	0.213050999010429	-0.148500553959647	257.476740083188	0.442361111111111	4.10770436155988	0.00235781859925	29.1612	-0.368055555555556	0.3725	0.166920634920635	0.354354838709677	0.0944444444444444	0.4625	NO	NO	NO	0	0.03125	C	B	-1.32389005436167	0.353228137409554	0.82266068621531	-0.186399476423281	-0.680257347697138	1.12879911675161	1.10092046257167	0.0449652731483522	-1.67711819177122	1.00906016263859
AL5G39470	AT3G57800	OG0013350	.	protein_coding	basic helix-loop-helix (bHLH) D-binding superfamily protein	.	basic helix-loop-helix (bHLH) D-binding superfamily protein%3B FUNCTIONS IN: D binding%2C sequence-specific D binding transcription factor activity%3B INVOLVED IN: regulation of transcription%3B LOCATED IN: nucleus%3B EXPRESSED IN: 21 plant structures%3B EXPRESSED DURING: 13 growth stages%3B CONTAINS InterPro DOMAIN/s: Helix-loop-helix D-binding domain (InterPro:IPR001092)%2C Helix-loop-helix D-b…	.	basic helix-loop-helix (bHLH) D-binding superfamily protein%3B FUNCTIONS IN: D binding%2C sequence-specific D binding transcription factor activity%3B INVOLVED IN: regulation of transcription%3B LOCATED IN: nucleus%3B EXPRESSED IN: 21 plant structures%3B EXPRESSED DURING: 13 growth stages%3B CONTAINS InterPro DOMAIN/s: Helix-loop-helix D-binding domain (InterPro:IPR001092)%2C Helix-loop-helix D-b…	scaffold_5	18594981	18598896	3916	-	scaffold_5	18594738	18595281	544	*	0.213050999010429	-0.148500553959647	257.476740083188	0.442361111111111	4.10770436155988	0.00235781859925	29.1612	-0.368055555555556	0.3725	0.166920634920635	0.354354838709677	0.0944444444444444	0.4625	NO	NO	NO	0	0.03125	C	B	-1.32389005436167	0.353228137409554	0.82266068621531	-0.186399476423281	-0.680257347697138	1.12879911675161	1.10092046257167	0.0449652731483522	-1.67711819177122	1.00906016263859
AL5G39980	AT3G58270	OG0003124	.	protein_coding	phospholipase-like protein (PEARLI 4) with TRAF-like domain protein	.	Arabidopsis phospholipase-like protein (PEARLI 4) with TRAF-like domain%3B CONTAINS InterPro DOMAIN/s: TRAF-like (InterPro:IPR008974)%2C MATH (InterPro:IPR002083)%2C Phospholipase-like%2C arabidopsis (InterPro:IPR007942)%3B BEST Arabidopsis thaliana protein match is: RESTRICTED TEV MOVEMENT 3 (TAIR:AT3G58350.1)%3B Has 1579 Blast hits to 1429 proteins in 196 species: Archae - 9%3B Bacteria - 32%3B…	.	Arabidopsis phospholipase-like protein (PEARLI 4) with TRAF-like domain%3B CONTAINS InterPro DOMAIN/s: TRAF-like (InterPro:IPR008974)%2C MATH (InterPro:IPR002083)%2C Phospholipase-like%2C arabidopsis (InterPro:IPR007942)%3B BEST Arabidopsis thaliana protein match is: RESTRICTED TEV MOVEMENT 3 (TAIR:AT3G58350.1)%3B Has 1579 Blast hits to 1429 proteins in 196 species: Archae - 9%3B Bacteria - 32%3B…	scaffold_5	18808646	18810663	2018	-	scaffold_5	18808973	18809446	474	*	0.217075002773323	0.00376549899359033	256.616799114166	0.4075	3.98667227429784	0.00137212993896	9.1057	-0.04375	0.364305555555556	0.332126984126984	0.145564516129032	0.31	0.35375	NO	NO	NO	0.166666666666667	0.375	B	B	-0.262854244645909	-2.0664399479526	0.0284450464751378	-1.97050875076043	0.380778462018623	-1.29086896861055	0.306704822831499	-1.7391440011888	1.80358570330669	1.99895379723557
AL5G39980	AT3G58270	OG0003124	.	protein_coding	phospholipase-like protein (PEARLI 4) with TRAF-like domain protein	.	Arabidopsis phospholipase-like protein (PEARLI 4) with TRAF-like domain%3B CONTAINS InterPro DOMAIN/s: TRAF-like (InterPro:IPR008974)%2C MATH (InterPro:IPR002083)%2C Phospholipase-like%2C arabidopsis (InterPro:IPR007942)%3B BEST Arabidopsis thaliana protein match is: RESTRICTED TEV MOVEMENT 3 (TAIR:AT3G58350.1)%3B Has 1579 Blast hits to 1429 proteins in 196 species: Archae - 9%3B Bacteria - 32%3B…	.	Arabidopsis phospholipase-like protein (PEARLI 4) with TRAF-like domain%3B CONTAINS InterPro DOMAIN/s: TRAF-like (InterPro:IPR008974)%2C MATH (InterPro:IPR002083)%2C Phospholipase-like%2C arabidopsis (InterPro:IPR007942)%3B BEST Arabidopsis thaliana protein match is: RESTRICTED TEV MOVEMENT 3 (TAIR:AT3G58350.1)%3B Has 1579 Blast hits to 1429 proteins in 196 species: Archae - 9%3B Bacteria - 32%3B…	scaffold_5	18808646	18810663	2018	-	scaffold_5	18808973	18809446	474	*	0.217075002773323	0.00376549899359033	256.616799114166	0.4075	3.98667227429784	0.00137212993896	9.1057	-0.04375	0.364305555555556	0.332126984126984	0.145564516129032	0.31	0.35375	NO	NO	NO	0.166666666666667	0.375	C	B	-0.262854244645909	-2.0664399479526	0.0284450464751378	-1.97050875076043	0.380778462018623	-1.29086896861055	0.306704822831499	-1.7391440011888	1.80358570330669	1.99895379723557
AL5G39980	AT3G58270	OG0003124	.	protein_coding	phospholipase-like protein (PEARLI 4) with TRAF-like domain protein	.	Arabidopsis phospholipase-like protein (PEARLI 4) with TRAF-like domain%3B CONTAINS InterPro DOMAIN/s: TRAF-like (InterPro:IPR008974)%2C MATH (InterPro:IPR002083)%2C Phospholipase-like%2C arabidopsis (InterPro:IPR007942)%3B BEST Arabidopsis thaliana protein match is: RESTRICTED TEV MOVEMENT 3 (TAIR:AT3G58350.1)%3B Has 1579 Blast hits to 1429 proteins in 196 species: Archae - 9%3B Bacteria - 32%3B…	.	Arabidopsis phospholipase-like protein (PEARLI 4) with TRAF-like domain%3B CONTAINS InterPro DOMAIN/s: TRAF-like (InterPro:IPR008974)%2C MATH (InterPro:IPR002083)%2C Phospholipase-like%2C arabidopsis (InterPro:IPR007942)%3B BEST Arabidopsis thaliana protein match is: RESTRICTED TEV MOVEMENT 3 (TAIR:AT3G58350.1)%3B Has 1579 Blast hits to 1429 proteins in 196 species: Archae - 9%3B Bacteria - 32%3B…	scaffold_5	18808646	18810663	2018	-	scaffold_5	18808973	18809446	474	*	0.217075002773323	0.00376549899359033	256.616799114166	0.4075	3.98667227429784	0.00137212993896	9.1057	-0.04375	0.364305555555556	0.332126984126984	0.145564516129032	0.31	0.35375	NO	NO	NO	0.166666666666667	0.375	C	B	-0.262854244645909	-2.0664399479526	0.0284450464751378	-1.97050875076043	0.380778462018623	-1.29086896861055	0.306704822831499	-1.7391440011888	1.80358570330669	1.99895379723557
AL5G39980	AT3G58270	OG0003124	.	protein_coding	phospholipase-like protein (PEARLI 4) with TRAF-like domain protein	.	Arabidopsis phospholipase-like protein (PEARLI 4) with TRAF-like domain%3B CONTAINS InterPro DOMAIN/s: TRAF-like (InterPro:IPR008974)%2C MATH (InterPro:IPR002083)%2C Phospholipase-like%2C arabidopsis (InterPro:IPR007942)%3B BEST Arabidopsis thaliana protein match is: RESTRICTED TEV MOVEMENT 3 (TAIR:AT3G58350.1)%3B Has 1579 Blast hits to 1429 proteins in 196 species: Archae - 9%3B Bacteria - 32%3B…	.	Arabidopsis phospholipase-like protein (PEARLI 4) with TRAF-like domain%3B CONTAINS InterPro DOMAIN/s: TRAF-like (InterPro:IPR008974)%2C MATH (InterPro:IPR002083)%2C Phospholipase-like%2C arabidopsis (InterPro:IPR007942)%3B BEST Arabidopsis thaliana protein match is: RESTRICTED TEV MOVEMENT 3 (TAIR:AT3G58350.1)%3B Has 1579 Blast hits to 1429 proteins in 196 species: Archae - 9%3B Bacteria - 32%3B…	scaffold_5	18808646	18810663	2018	-	scaffold_5	18808973	18809446	474	*	0.217075002773323	0.00376549899359033	256.616799114166	0.4075	3.98667227429784	0.00137212993896	9.1057	-0.04375	0.364305555555556	0.332126984126984	0.145564516129032	0.31	0.35375	NO	MODERATE	NO	0.166666666666667	0.375	C	B	-0.262854244645909	-2.0664399479526	0.0284450464751378	-1.97050875076043	0.380778462018623	-1.29086896861055	0.306704822831499	-1.7391440011888	1.80358570330669	1.99895379723557
AL5G42210	AT3G60030	OG0007168	SPL12	protein_coding	squamosa promoter-binding protein-like 12	squamosa promoter-binding protein-like 12	squamosa promoter-binding protein-like 12 (SPL12)%3B FUNCTIONS IN: sequence-specific D binding transcription factor activity%3B INVOLVED IN: regulation of transcription%3B LOCATED IN: nucleus%3B EXPRESSED IN: 22 plant structures%3B EXPRESSED DURING: 14 growth stages%3B CONTAINS InterPro DOMAIN/s: Ankyrin repeat-containing domain (InterPro:IPR020683)%2C Transcription factor%2C SBP-box (InterPro:IP…	.	squamosa promoter-binding protein-like 12 (SPL12)%3B FUNCTIONS IN: sequence-specific D binding transcription factor activity%3B INVOLVED IN: regulation of transcription%3B LOCATED IN: nucleus%3B EXPRESSED IN: 22 plant structures%3B EXPRESSED DURING: 14 growth stages%3B CONTAINS InterPro DOMAIN/s: Ankyrin repeat-containing domain (InterPro:IPR020683)%2C Transcription factor%2C SBP-box (InterPro:IP…	scaffold_5	19629792	19634052	4261	-	scaffold_5	19630940	19631184	245	*	0.103317367873449	0.10645932576026	261.692908905003	0.460208333333333	1.40804743638356	0.0549165281022	10.0353	-0.230555555555556	0.291388888888889	0.410920634920635	0.325483870967742	0.324444444444444	0.555	NO	MODERATE	NO	0.777777777777778	0.84375	C	B	0.781195933110701	0.920636211541826	-0.736576992935273	-1.79230265791619	1.42482863977523	1.69620719088388	-0.458317216578911	-1.56093790834456	-0.139440278431125	1.05572566498092
AL5G42210	AT3G60030	OG0007168	SPL12	protein_coding	squamosa promoter-binding protein-like 12	squamosa promoter-binding protein-like 12	squamosa promoter-binding protein-like 12 (SPL12)%3B FUNCTIONS IN: sequence-specific D binding transcription factor activity%3B INVOLVED IN: regulation of transcription%3B LOCATED IN: nucleus%3B EXPRESSED IN: 22 plant structures%3B EXPRESSED DURING: 14 growth stages%3B CONTAINS InterPro DOMAIN/s: Ankyrin repeat-containing domain (InterPro:IPR020683)%2C Transcription factor%2C SBP-box (InterPro:IP…	.	squamosa promoter-binding protein-like 12 (SPL12)%3B FUNCTIONS IN: sequence-specific D binding transcription factor activity%3B INVOLVED IN: regulation of transcription%3B LOCATED IN: nucleus%3B EXPRESSED IN: 22 plant structures%3B EXPRESSED DURING: 14 growth stages%3B CONTAINS InterPro DOMAIN/s: Ankyrin repeat-containing domain (InterPro:IPR020683)%2C Transcription factor%2C SBP-box (InterPro:IP…	scaffold_5	19629792	19634052	4261	-	scaffold_5	19632495	19632709	215	*	0.177851997109191	-0.0660668350922488	278.052389000136	0.411111111111111	2.77117883715238	0.00155907618142	6.7516	0.0156944444444445	0.329027777777778	0.237460317460317	0.274596774193548	0.524444444444444	0.50875	NO	NO	NO	0.777777777777778	0.84375	C	B	1.20470435662586	0.997018067675016	-2.04654623850105	0.100368948843305	1.84833706329039	1.77258904701707	-1.76828646214469	0.331733698414938	0.207686288950844	-2.14691518734436
AL5G42210	AT3G60030	OG0007168	SPL12	protein_coding	squamosa promoter-binding protein-like 12	squamosa promoter-binding protein-like 12	squamosa promoter-binding protein-like 12 (SPL12)%3B FUNCTIONS IN: sequence-specific D binding transcription factor activity%3B INVOLVED IN: regulation of transcription%3B LOCATED IN: nucleus%3B EXPRESSED IN: 22 plant structures%3B EXPRESSED DURING: 14 growth stages%3B CONTAINS InterPro DOMAIN/s: Ankyrin repeat-containing domain (InterPro:IPR020683)%2C Transcription factor%2C SBP-box (InterPro:IP…	.	squamosa promoter-binding protein-like 12 (SPL12)%3B FUNCTIONS IN: sequence-specific D binding transcription factor activity%3B INVOLVED IN: regulation of transcription%3B LOCATED IN: nucleus%3B EXPRESSED IN: 22 plant structures%3B EXPRESSED DURING: 14 growth stages%3B CONTAINS InterPro DOMAIN/s: Ankyrin repeat-containing domain (InterPro:IPR020683)%2C Transcription factor%2C SBP-box (InterPro:IP…	scaffold_5	19629792	19634052	4261	-	scaffold_5	19632495	19632709	215	*	0.177851997109191	-0.0660668350922488	278.052389000136	0.411111111111111	2.77117883715238	0.00155907618142	6.7516	0.0156944444444445	0.329027777777778	0.237460317460317	0.274596774193548	0.524444444444444	0.50875	NO	MODERATE	NO	0.777777777777778	0.84375	C	B	1.20470435662586	0.997018067675016	-2.04654623850105	0.100368948843305	1.84833706329039	1.77258904701707	-1.76828646214469	0.331733698414938	0.207686288950844	-2.14691518734436
AL5G42210	AT3G60030	OG0007168	SPL12	protein_coding	squamosa promoter-binding protein-like 12	squamosa promoter-binding protein-like 12	squamosa promoter-binding protein-like 12 (SPL12)%3B FUNCTIONS IN: sequence-specific D binding transcription factor activity%3B INVOLVED IN: regulation of transcription%3B LOCATED IN: nucleus%3B EXPRESSED IN: 22 plant structures%3B EXPRESSED DURING: 14 growth stages%3B CONTAINS InterPro DOMAIN/s: Ankyrin repeat-containing domain (InterPro:IPR020683)%2C Transcription factor%2C SBP-box (InterPro:IP…	.	squamosa promoter-binding protein-like 12 (SPL12)%3B FUNCTIONS IN: sequence-specific D binding transcription factor activity%3B INVOLVED IN: regulation of transcription%3B LOCATED IN: nucleus%3B EXPRESSED IN: 22 plant structures%3B EXPRESSED DURING: 14 growth stages%3B CONTAINS InterPro DOMAIN/s: Ankyrin repeat-containing domain (InterPro:IPR020683)%2C Transcription factor%2C SBP-box (InterPro:IP…	scaffold_5	19629792	19634052	4261	-	scaffold_5	19630940	19631184	245	*	0.103317367873449	0.10645932576026	261.692908905003	0.460208333333333	1.40804743638356	0.0549165281022	10.0353	-0.230555555555556	0.291388888888889	0.410920634920635	0.325483870967742	0.324444444444444	0.555	NO	NO	NO	0.777777777777778	0.84375	C	B	0.781195933110701	0.920636211541826	-0.736576992935273	-1.79230265791619	1.42482863977523	1.69620719088388	-0.458317216578911	-1.56093790834456	-0.139440278431125	1.05572566498092
AL5G42260	AT3G60070	OG0001945	.	protein_coding	Major facilitator superfamily protein	.	Major facilitator superfamily protein%3B FUNCTIONS IN: molecular_function unknown%3B INVOLVED IN: transmembrane transport%3B LOCATED IN: membrane%3B EXPRESSED IN: 25 plant structures%3B EXPRESSED DURING: 15 growth stages%3B CONTAINS InterPro DOMAIN/s: Major facilitator superfamily MFS-1 (InterPro:IPR011701)%2C Major facilitator superfamily%2C general substrate transporter (InterPro:IPR016196)%3B …	.	Major facilitator superfamily protein%3B FUNCTIONS IN: molecular_function unknown%3B INVOLVED IN: transmembrane transport%3B LOCATED IN: membrane%3B EXPRESSED IN: 25 plant structures%3B EXPRESSED DURING: 15 growth stages%3B CONTAINS InterPro DOMAIN/s: Major facilitator superfamily MFS-1 (InterPro:IPR011701)%2C Major facilitator superfamily%2C general substrate transporter (InterPro:IPR016196)%3B …	scaffold_5	19657146	19660262	3117	-	scaffold_5	19658833	19659215	383	*	0.164243726096503	-0.010949942677126	213.437833790245	0.374791666666667	2.61643685330407	0.00928877659294	11.5018	-0.218194444444444	0.292638888888889	0.281079365079365	0.232661290322581	0.225555555555556	0.44375	NO	NO	NO	NO	NO	C	B	-0.954735653115834	0.207284233726484	-0.0112283078191359	0.277550868740165	-0.311102946451302	0.982855213068535	0.267031468537226	0.508915618311798	-1.16201988684232	-0.288779176559301
AL5G42260	AT2G44280	OG0001945	.	protein_coding	Major facilitator superfamily protein	.	Major facilitator superfamily protein%3B CONTAINS InterPro DOMAIN/s: Major facilitator superfamily%2C general substrate transporter (InterPro:IPR016196)%3B BEST Arabidopsis thaliana protein match is: Major facilitator superfamily protein (TAIR:AT3G60070.1)%3B Has 1338 Blast hits to 1325 proteins in 439 species: Archae - 0%3B Bacteria - 1065%3B Metazoa - 130%3B Fungi - 0%3B Plants - 58%3B Viruses …	.	Major facilitator superfamily protein%3B CONTAINS InterPro DOMAIN/s: Major facilitator superfamily%2C general substrate transporter (InterPro:IPR016196)%3B BEST Arabidopsis thaliana protein match is: Major facilitator superfamily protein (TAIR:AT3G60070.1)%3B Has 1338 Blast hits to 1325 proteins in 439 species: Archae - 0%3B Bacteria - 1065%3B Metazoa - 130%3B Fungi - 0%3B Plants - 58%3B Viruses …	scaffold_5	19657146	19660262	3117	-	scaffold_5	19658833	19659215	383	*	0.164243726096503	-0.010949942677126	213.437833790245	0.374791666666667	2.61643685330407	0.00928877659294	11.5018	-0.218194444444444	0.292638888888889	0.281079365079365	0.232661290322581	0.225555555555556	0.44375	NO	NO	NO	NO	NO	C	B	-0.954735653115834	0.207284233726484	-0.0112283078191359	0.277550868740165	-0.311102946451302	0.982855213068535	0.267031468537226	0.508915618311798	-1.16201988684232	-0.288779176559301
AL5G42300	AT2G44350	OG0001146	ATCS	protein_coding	Citrate synthase family protein	.	ATCS%3B FUNCTIONS IN: citrate (SI)-synthase activity%2C zinc ion binding%2C ATP binding%3B INVOLVED IN: response to cadmium ion%2C tricarboxylic acid cycle%3B LOCATED IN: mitochondrion%2C cell wall%2C chloroplast%3B EXPRESSED IN: 25 plant structures%3B EXPRESSED DURING: 15 growth stages%3B CONTAINS InterPro DOMAIN/s: Citrate synthase-like%2C large alpha subdomain (InterPro:IPR016142)%2C Citrate s…	encodes a mitochrondrion targeted citrate synthase%2C the first enzyme of the tricarboxylic acid cycle%2C catalyzing the condensation of acetyl-CoA and oxaloacetate%2C finally yielding citrate and CoA.	ATCS%3B FUNCTIONS IN: citrate (SI)-synthase activity%2C zinc ion binding%2C ATP binding%3B INVOLVED IN: response to cadmium ion%2C tricarboxylic acid cycle%3B LOCATED IN: mitochondrion%2C cell wall%2C chloroplast%3B EXPRESSED IN: 25 plant structures%3B EXPRESSED DURING: 15 growth stages%3B CONTAINS InterPro DOMAIN/s: Citrate synthase-like%2C large alpha subdomain (InterPro:IPR016142)%2C Citrate s…	scaffold_5	19667377	19671300	3924	+	scaffold_5	19669053	19669257	205	*	0.172183984781074	-0.0820647584137026	211.196923525996	0.370763888888889	3.21019620752505	7.0556554138E-4	4.8593	-0.153055555555556	0.2725	0.19231746031746	0.307741935483871	0.154444444444444	0.3075	NO	NO	NO	NO	NO	C	B	-0.870939868783971	0.691490643142256	0.394487881378952	0.231463086108035	-0.227307162119439	1.46706162248431	0.672747657735314	0.462827835679668	-1.56243051192623	0.163024795270917
AL5G42300	AT3G60100	OG0001146	CSY5	protein_coding	citrate synthase 5	citrate synthase 5	citrate synthase 5 (CSY5)%3B FUNCTIONS IN: citrate (SI)-synthase activity%2C transferase activity%2C transferring acyl groups%2C acyl groups converted into alkyl on transfer%3B INVOLVED IN: cellular carbohydrate metabolic process%2C tricarboxylic acid cycle%3B LOCATED IN: mitochondrion%3B EXPRESSED IN: 8 plant structures%3B EXPRESSED DURING: M germinated pollen stage%2C 4 anthesis%2C 4 leaf senes…	.	citrate synthase 5 (CSY5)%3B FUNCTIONS IN: citrate (SI)-synthase activity%2C transferase activity%2C transferring acyl groups%2C acyl groups converted into alkyl on transfer%3B INVOLVED IN: cellular carbohydrate metabolic process%2C tricarboxylic acid cycle%3B LOCATED IN: mitochondrion%3B EXPRESSED IN: 8 plant structures%3B EXPRESSED DURING: M germinated pollen stage%2C 4 anthesis%2C 4 leaf senes…	scaffold_5	19667377	19671300	3924	+	scaffold_5	19669053	19669257	205	*	0.172183984781074	-0.0820647584137026	211.196923525996	0.370763888888889	3.21019620752505	7.0556554138E-4	4.8593	-0.153055555555556	0.2725	0.19231746031746	0.307741935483871	0.154444444444444	0.3075	NO	NO	NO	NO	NO	C	B	-0.870939868783971	0.691490643142256	0.394487881378952	0.231463086108035	-0.227307162119439	1.46706162248431	0.672747657735314	0.462827835679668	-1.56243051192623	0.163024795270917
AL5G42920	AT3G60620	OG0007137	CDS5	protein_coding	cytidinediphosphate diacylglycerol synthase 5	cytidinediphosphate diacylglycerol synthase 5	cytidinediphosphate diacylglycerol synthase 5 (CDS5)%3B FUNCTIONS IN: phosphatidate cytidylyltransferase activity%3B INVOLVED IN: phospholipid biosynthetic process%3B LOCATED IN: chloroplast%2C plastid%2C membrane%2C chloroplast envelope%3B EXPRESSED IN: 19 plant structures%3B EXPRESSED DURING: 13 growth stages%3B CONTAINS InterPro DOMAIN/s: Phosphatidate cytidylyltransferase (InterPro:IPR000374)…	.	cytidinediphosphate diacylglycerol synthase 5 (CDS5)%3B FUNCTIONS IN: phosphatidate cytidylyltransferase activity%3B INVOLVED IN: phospholipid biosynthetic process%3B LOCATED IN: chloroplast%2C plastid%2C membrane%2C chloroplast envelope%3B EXPRESSED IN: 19 plant structures%3B EXPRESSED DURING: 13 growth stages%3B CONTAINS InterPro DOMAIN/s: Phosphatidate cytidylyltransferase (InterPro:IPR000374)…	scaffold_5	19974597	19977045	2449	+	scaffold_5	19975564	19976420	857	*	0.211697471670207	-0.202805932308644	260.69600568327	0.369652777777778	3.40095266785992	0.00555134664367	13.635	0.157916666666667	0.337916666666667	0.0898412698412698	0.281048387096774	0.496666666666667	0.33875	NO	MODERATE	NO	NO	NO	C	A	-2.44154463727465	0.643751983058999	-4.29520201774654	0.113683197159251	-1.79791193061012	1.41932296240105	-4.01694224139018	0.345047946730884	-3.08529662033365	-4.40888521490579
AL5G42920	AT3G60620	OG0007137	CDS5	protein_coding	cytidinediphosphate diacylglycerol synthase 5	cytidinediphosphate diacylglycerol synthase 5	cytidinediphosphate diacylglycerol synthase 5 (CDS5)%3B FUNCTIONS IN: phosphatidate cytidylyltransferase activity%3B INVOLVED IN: phospholipid biosynthetic process%3B LOCATED IN: chloroplast%2C plastid%2C membrane%2C chloroplast envelope%3B EXPRESSED IN: 19 plant structures%3B EXPRESSED DURING: 13 growth stages%3B CONTAINS InterPro DOMAIN/s: Phosphatidate cytidylyltransferase (InterPro:IPR000374)…	.	cytidinediphosphate diacylglycerol synthase 5 (CDS5)%3B FUNCTIONS IN: phosphatidate cytidylyltransferase activity%3B INVOLVED IN: phospholipid biosynthetic process%3B LOCATED IN: chloroplast%2C plastid%2C membrane%2C chloroplast envelope%3B EXPRESSED IN: 19 plant structures%3B EXPRESSED DURING: 13 growth stages%3B CONTAINS InterPro DOMAIN/s: Phosphatidate cytidylyltransferase (InterPro:IPR000374)…	scaffold_5	19974597	19977045	2449	+	scaffold_5	19975564	19976420	857	*	0.211697471670207	-0.202805932308644	260.69600568327	0.369652777777778	3.40095266785992	0.00555134664367	13.635	0.157916666666667	0.337916666666667	0.0898412698412698	0.281048387096774	0.496666666666667	0.33875	NO	NO	NO	NO	NO	C	A	-2.44154463727465	0.643751983058999	-4.29520201774654	0.113683197159251	-1.79791193061012	1.41932296240105	-4.01694224139018	0.345047946730884	-3.08529662033365	-4.40888521490579
AL5G42920	AT3G60620	OG0007137	CDS5	protein_coding	cytidinediphosphate diacylglycerol synthase 5	cytidinediphosphate diacylglycerol synthase 5	cytidinediphosphate diacylglycerol synthase 5 (CDS5)%3B FUNCTIONS IN: phosphatidate cytidylyltransferase activity%3B INVOLVED IN: phospholipid biosynthetic process%3B LOCATED IN: chloroplast%2C plastid%2C membrane%2C chloroplast envelope%3B EXPRESSED IN: 19 plant structures%3B EXPRESSED DURING: 13 growth stages%3B CONTAINS InterPro DOMAIN/s: Phosphatidate cytidylyltransferase (InterPro:IPR000374)…	.	cytidinediphosphate diacylglycerol synthase 5 (CDS5)%3B FUNCTIONS IN: phosphatidate cytidylyltransferase activity%3B INVOLVED IN: phospholipid biosynthetic process%3B LOCATED IN: chloroplast%2C plastid%2C membrane%2C chloroplast envelope%3B EXPRESSED IN: 19 plant structures%3B EXPRESSED DURING: 13 growth stages%3B CONTAINS InterPro DOMAIN/s: Phosphatidate cytidylyltransferase (InterPro:IPR000374)…	scaffold_5	19974597	19977045	2449	+	scaffold_5	19975564	19976420	857	*	0.211697471670207	-0.202805932308644	260.69600568327	0.369652777777778	3.40095266785992	0.00555134664367	13.635	0.157916666666667	0.337916666666667	0.0898412698412698	0.281048387096774	0.496666666666667	0.33875	NO	NO	NO	NO	NO	C	A	-2.44154463727465	0.643751983058999	-4.29520201774654	0.113683197159251	-1.79791193061012	1.41932296240105	-4.01694224139018	0.345047946730884	-3.08529662033365	-4.40888521490579
AL5G42920	AT3G60620	OG0007137	CDS5	protein_coding	cytidinediphosphate diacylglycerol synthase 5	cytidinediphosphate diacylglycerol synthase 5	cytidinediphosphate diacylglycerol synthase 5 (CDS5)%3B FUNCTIONS IN: phosphatidate cytidylyltransferase activity%3B INVOLVED IN: phospholipid biosynthetic process%3B LOCATED IN: chloroplast%2C plastid%2C membrane%2C chloroplast envelope%3B EXPRESSED IN: 19 plant structures%3B EXPRESSED DURING: 13 growth stages%3B CONTAINS InterPro DOMAIN/s: Phosphatidate cytidylyltransferase (InterPro:IPR000374)…	.	cytidinediphosphate diacylglycerol synthase 5 (CDS5)%3B FUNCTIONS IN: phosphatidate cytidylyltransferase activity%3B INVOLVED IN: phospholipid biosynthetic process%3B LOCATED IN: chloroplast%2C plastid%2C membrane%2C chloroplast envelope%3B EXPRESSED IN: 19 plant structures%3B EXPRESSED DURING: 13 growth stages%3B CONTAINS InterPro DOMAIN/s: Phosphatidate cytidylyltransferase (InterPro:IPR000374)…	scaffold_5	19974597	19977045	2449	+	scaffold_5	19975564	19976420	857	*	0.211697471670207	-0.202805932308644	260.69600568327	0.369652777777778	3.40095266785992	0.00555134664367	13.635	0.157916666666667	0.337916666666667	0.0898412698412698	0.281048387096774	0.496666666666667	0.33875	NO	NO	NO	NO	NO	C	A	-2.44154463727465	0.643751983058999	-4.29520201774654	0.113683197159251	-1.79791193061012	1.41932296240105	-4.01694224139018	0.345047946730884	-3.08529662033365	-4.40888521490579
AL5G42920	AT3G60620	OG0007137	CDS5	protein_coding	cytidinediphosphate diacylglycerol synthase 5	cytidinediphosphate diacylglycerol synthase 5	cytidinediphosphate diacylglycerol synthase 5 (CDS5)%3B FUNCTIONS IN: phosphatidate cytidylyltransferase activity%3B INVOLVED IN: phospholipid biosynthetic process%3B LOCATED IN: chloroplast%2C plastid%2C membrane%2C chloroplast envelope%3B EXPRESSED IN: 19 plant structures%3B EXPRESSED DURING: 13 growth stages%3B CONTAINS InterPro DOMAIN/s: Phosphatidate cytidylyltransferase (InterPro:IPR000374)…	.	cytidinediphosphate diacylglycerol synthase 5 (CDS5)%3B FUNCTIONS IN: phosphatidate cytidylyltransferase activity%3B INVOLVED IN: phospholipid biosynthetic process%3B LOCATED IN: chloroplast%2C plastid%2C membrane%2C chloroplast envelope%3B EXPRESSED IN: 19 plant structures%3B EXPRESSED DURING: 13 growth stages%3B CONTAINS InterPro DOMAIN/s: Phosphatidate cytidylyltransferase (InterPro:IPR000374)…	scaffold_5	19974597	19977045	2449	+	scaffold_5	19975564	19976420	857	*	0.211697471670207	-0.202805932308644	260.69600568327	0.369652777777778	3.40095266785992	0.00555134664367	13.635	0.157916666666667	0.337916666666667	0.0898412698412698	0.281048387096774	0.496666666666667	0.33875	NO	NO	NO	NO	NO	C	A	-2.44154463727465	0.643751983058999	-4.29520201774654	0.113683197159251	-1.79791193061012	1.41932296240105	-4.01694224139018	0.345047946730884	-3.08529662033365	-4.40888521490579
AL5G45630	AT3G62860	OG0002056	.	protein_coding	alpha/beta-Hydrolases superfamily protein	.	alpha/beta-Hydrolases superfamily protein%3B FUNCTIONS IN: catalytic activity%3B LOCATED IN: plasma membrane%3B EXPRESSED IN: 15 plant structures%3B EXPRESSED DURING: LP.06 six leaves visible%2C LP.04 four leaves visible%2C 4 anthesis%2C C globular stage%2C petal differentiation and expansion stage%3B BEST Arabidopsis thaliana protein match is: alpha/beta-Hydrolases superfamily protein (TAIR:AT2G…	.	alpha/beta-Hydrolases superfamily protein%3B FUNCTIONS IN: catalytic activity%3B LOCATED IN: plasma membrane%3B EXPRESSED IN: 15 plant structures%3B EXPRESSED DURING: LP.06 six leaves visible%2C LP.04 four leaves visible%2C 4 anthesis%2C C globular stage%2C petal differentiation and expansion stage%3B BEST Arabidopsis thaliana protein match is: alpha/beta-Hydrolases superfamily protein (TAIR:AT2G…	scaffold_5	20942238	20945271	3034	-	scaffold_5	20945946	20946211	266	*	0.206596220764348	0.0464403940032996	228.530660306735	0.3075	3.58199822060108	0.0138753078716	23.1529	0.276111111111111	0.306111111111111	0.351365079365079	0.0193548387096774	0.331111111111111	0.055	NO	NO	NO	NO	NO	B	B	2.35293307706532	-1.19350444928756	-1.77257552771415	-1.70832047623097	2.99656578372985	-0.417933469945509	-1.49431575135779	-1.47695572665934	3.54643752635288	-0.0642550514831799
AL5G45630	AT3G62860	OG0002056	.	protein_coding	alpha/beta-Hydrolases superfamily protein	.	alpha/beta-Hydrolases superfamily protein%3B FUNCTIONS IN: catalytic activity%3B LOCATED IN: plasma membrane%3B EXPRESSED IN: 15 plant structures%3B EXPRESSED DURING: LP.06 six leaves visible%2C LP.04 four leaves visible%2C 4 anthesis%2C C globular stage%2C petal differentiation and expansion stage%3B BEST Arabidopsis thaliana protein match is: alpha/beta-Hydrolases superfamily protein (TAIR:AT2G…	.	alpha/beta-Hydrolases superfamily protein%3B FUNCTIONS IN: catalytic activity%3B LOCATED IN: plasma membrane%3B EXPRESSED IN: 15 plant structures%3B EXPRESSED DURING: LP.06 six leaves visible%2C LP.04 four leaves visible%2C 4 anthesis%2C C globular stage%2C petal differentiation and expansion stage%3B BEST Arabidopsis thaliana protein match is: alpha/beta-Hydrolases superfamily protein (TAIR:AT2G…	scaffold_5	20942238	20945271	3034	-	scaffold_5	20945946	20946211	266	*	0.206596220764348	0.0464403940032996	228.530660306735	0.3075	3.58199822060108	0.0138753078716	23.1529	0.276111111111111	0.306111111111111	0.351365079365079	0.0193548387096774	0.331111111111111	0.055	NO	NO	NO	NO	NO	C	B	2.35293307706532	-1.19350444928756	-1.77257552771415	-1.70832047623097	2.99656578372985	-0.417933469945509	-1.49431575135779	-1.47695572665934	3.54643752635288	-0.0642550514831799
AL5G45630	AT3G62860	OG0002056	.	protein_coding	alpha/beta-Hydrolases superfamily protein	.	alpha/beta-Hydrolases superfamily protein%3B FUNCTIONS IN: catalytic activity%3B LOCATED IN: plasma membrane%3B EXPRESSED IN: 15 plant structures%3B EXPRESSED DURING: LP.06 six leaves visible%2C LP.04 four leaves visible%2C 4 anthesis%2C C globular stage%2C petal differentiation and expansion stage%3B BEST Arabidopsis thaliana protein match is: alpha/beta-Hydrolases superfamily protein (TAIR:AT2G…	.	alpha/beta-Hydrolases superfamily protein%3B FUNCTIONS IN: catalytic activity%3B LOCATED IN: plasma membrane%3B EXPRESSED IN: 15 plant structures%3B EXPRESSED DURING: LP.06 six leaves visible%2C LP.04 four leaves visible%2C 4 anthesis%2C C globular stage%2C petal differentiation and expansion stage%3B BEST Arabidopsis thaliana protein match is: alpha/beta-Hydrolases superfamily protein (TAIR:AT2G…	scaffold_5	20942238	20945271	3034	-	scaffold_5	20945946	20946211	266	*	0.206596220764348	0.0464403940032996	228.530660306735	0.3075	3.58199822060108	0.0138753078716	23.1529	0.276111111111111	0.306111111111111	0.351365079365079	0.0193548387096774	0.331111111111111	0.055	NO	NO	NO	NO	NO	C	B	2.35293307706532	-1.19350444928756	-1.77257552771415	-1.70832047623097	2.99656578372985	-0.417933469945509	-1.49431575135779	-1.47695572665934	3.54643752635288	-0.0642550514831799
AL5G45630	AT3G62860	OG0002056	.	protein_coding	alpha/beta-Hydrolases superfamily protein	.	alpha/beta-Hydrolases superfamily protein%3B FUNCTIONS IN: catalytic activity%3B LOCATED IN: plasma membrane%3B EXPRESSED IN: 15 plant structures%3B EXPRESSED DURING: LP.06 six leaves visible%2C LP.04 four leaves visible%2C 4 anthesis%2C C globular stage%2C petal differentiation and expansion stage%3B BEST Arabidopsis thaliana protein match is: alpha/beta-Hydrolases superfamily protein (TAIR:AT2G…	.	alpha/beta-Hydrolases superfamily protein%3B FUNCTIONS IN: catalytic activity%3B LOCATED IN: plasma membrane%3B EXPRESSED IN: 15 plant structures%3B EXPRESSED DURING: LP.06 six leaves visible%2C LP.04 four leaves visible%2C 4 anthesis%2C C globular stage%2C petal differentiation and expansion stage%3B BEST Arabidopsis thaliana protein match is: alpha/beta-Hydrolases superfamily protein (TAIR:AT2G…	scaffold_5	20942238	20945271	3034	-	scaffold_5	20945946	20946211	266	*	0.206596220764348	0.0464403940032996	228.530660306735	0.3075	3.58199822060108	0.0138753078716	23.1529	0.276111111111111	0.306111111111111	0.351365079365079	0.0193548387096774	0.331111111111111	0.055	NO	NO	NO	NO	NO	C	B	2.35293307706532	-1.19350444928756	-1.77257552771415	-1.70832047623097	2.99656578372985	-0.417933469945509	-1.49431575135779	-1.47695572665934	3.54643752635288	-0.0642550514831799
[truncated: 476 more rows]
[truncated: 31 more columns]

## Sheet: High_effect_SNPs
Gene_description															High_effect_SNPs									Metal_homeostasis_gene_list													Number_of_copies
AL_ID	AT_ID	OrthoGroup	symbol	locus_type	note	full_name	description	curator_summary	computational_description	Scaffold	Gene_start	Gene_end	Gene_size	Gene_strand	Scaffold	Position	Base	Characterization	Effect	Allele_Frequency_Klet	Allele_Frequency_Kowa	Allele_Frequency_Klet-Allele_Frequency_Kowa	UnifiedGenotyper_Allele_Frequency_difference	ID	Name	Function	Localisation	EC.TC	Comment	BINCODE	BIN	EvidenceCode	Annotator...Curator	metal.1	metal.2	metal.3	Thaliana_paralogue_number	Halleri_paralogue_number	Lyrata_paralogue_number
[truncated: 8 more rows]

## Sheet: Indels
Gene_description										Indel_HaplotypeCaller									Indels_GROM												Metal_homeostasis_gene_list
[truncated: 35 more rows]
