# Supplementary material for: Convergent evolution in Arabidopsis halleri and Arabidopsis arenosa on calamine metalliferous soils
Source: Philos Trans R Soc Lond B Biol Sci. 2019 Jun 3;374(1777):20180243. doi: 10.1098/rstb.2018.0243 (PMC6560266; doi:10.1098/rstb.2018.0243)
Supplement: Dataset S6 [file rstb20180243supp17.xlsx]

## Sheet: Convergent genes
Dataset S6. Comprehensive list of convergent genes including filtered candidate genes from genome scans and from searches for large-effect indels and SNPs. Gene_description																			Comment	Metal_homeostasis_gene_list													Candidate origin 1	Candidate origin 2	Variant1	Variant2	High_effect_SNPs_1					Indels_HaplotypeCaller_1					Indels_GROM_1
AL_ID	AT_ID	GeneID	OrthoGroup	symbol	locus_type	note	full_name	description	curator_summary	computational_description	Scaffold	Software	Type	Start_position	End_position	Score	Strand	Frame	Comment	ID	Name	Function	Localisation	EC.TC	Comment	BINCODE	BIN	EvidenceCode	Annotator...Curator	metal.1	metal.2	metal.3	Candidate origin 1	Candidate origin 2	Variant1	Variant2	Scaffold	Position	Characterization	Allele_Frequency_M	Allele_Frequency_NM	Scaffold	Position	Allele_Frequency_M	Allele_Frequency_NM	Characterization	Scaffold	Position	Characterization
AL1G26170	AT1G14290	837990	OG0009637	SBH2	protein_coding	sphingoid base hydroxylase 2	sphingoid base hydroxylase 2	sphingoid base hydroxylase 2 (SBH2)%3B CONTAINS InterPro DOMAIN/s: Fatty acid hydroxylase (InterPro:IPR006694)%3B BEST Arabidopsis thaliana protein match is: sphingoid base hydroxylase 1 (TAIR:AT1G69640.1)%3B Has 2314 Blast hits to 2272 proteins in 379 species: Archae - 0%3B Bacteria - 367%3B Metazoa - 413%3B Fungi - 680%3B Plants - 393%3B Viruses - 3%3B Other Eukaryotes - 458 (source: NCBI BLink…	Encodes one of the two redundant sphingoid base hydroxylases (SBH). Involved in sphingolipid trihydroxy long-chain base (4-hydroxysphinganine) biosynthesis. Double mutants of SBHs were dwarfed and not able to progress from vegetative to reproductive growth.	sphingoid base hydroxylase 2 (SBH2)%3B CONTAINS InterPro DOMAIN/s: Fatty acid hydroxylase (InterPro:IPR006694)%3B BEST Arabidopsis thaliana protein match is: sphingoid base hydroxylase 1 (TAIR:AT1G69640.1)%3B Has 2314 Blast hits to 2272 proteins in 379 species: Archae - 0%3B Bacteria - 367%3B Metazoa - 413%3B Fungi - 680%3B Plants - 393%3B Viruses - 3%3B Other Eukaryotes - 458 (source: NCBI BLink…	scaffold_1	version-2	gene	6004645	6007642	0.04	-	.		.	.	.	.	.	.	.	.	.	.	.	.	.	KK_halleri	KK_arenosa	High_effect_SNP	DD	scaffold_1	6004693	splice_acceptor_variant&intron_variant	1	0.285714	.	.	.	.	.	.	.	.
AL1G26370	AT1G14470	838009	OG0009622	.	protein_coding	Pentatricopeptide repeat (PPR) superfamily protein	.	Pentatricopeptide repeat (PPR) superfamily protein%3B CONTAINS InterPro DOMAIN/s: Pentatricopeptide repeat (InterPro:IPR002885)%3B BEST Arabidopsis thaliana protein match is: Tetratricopeptide repeat (TPR)-like superfamily protein (TAIR:AT1G08070.1)%3B Has 45588 Blast hits to 14013 proteins in 255 species: Archae - 1%3B Bacteria - 22%3B Metazoa - 282%3B Fungi - 244%3B Plants - 44188%3B Viruses - …	.	Pentatricopeptide repeat (PPR) superfamily protein%3B CONTAINS InterPro DOMAIN/s: Pentatricopeptide repeat (InterPro:IPR002885)%3B BEST Arabidopsis thaliana protein match is: Tetratricopeptide repeat (TPR)-like superfamily protein (TAIR:AT1G08070.1)%3B Has 45588 Blast hits to 14013 proteins in 255 species: Archae - 1%3B Bacteria - 22%3B Metazoa - 282%3B Fungi - 244%3B Plants - 44188%3B Viruses - …	scaffold_1	version-2	gene	6090987	6093298	0.37	+	.		.	.	.	.	.	.	.	.	.	.	.	.	.	KK_halleri	KK_arenosa	High_effect_SNP	FLK	scaffold_1	6092675	stop_lost	1	0.357143	.	.	.	.	.	.	.	.
AL1G26370	AT1G14470	838009	OG0009622	.	protein_coding	Pentatricopeptide repeat (PPR) superfamily protein	.	Pentatricopeptide repeat (PPR) superfamily protein%3B CONTAINS InterPro DOMAIN/s: Pentatricopeptide repeat (InterPro:IPR002885)%3B BEST Arabidopsis thaliana protein match is: Tetratricopeptide repeat (TPR)-like superfamily protein (TAIR:AT1G08070.1)%3B Has 45588 Blast hits to 14013 proteins in 255 species: Archae - 1%3B Bacteria - 22%3B Metazoa - 282%3B Fungi - 244%3B Plants - 44188%3B Viruses - …	.	Pentatricopeptide repeat (PPR) superfamily protein%3B CONTAINS InterPro DOMAIN/s: Pentatricopeptide repeat (InterPro:IPR002885)%3B BEST Arabidopsis thaliana protein match is: Tetratricopeptide repeat (TPR)-like superfamily protein (TAIR:AT1G08070.1)%3B Has 45588 Blast hits to 14013 proteins in 255 species: Archae - 1%3B Bacteria - 22%3B Metazoa - 282%3B Fungi - 244%3B Plants - 44188%3B Viruses - …	scaffold_1	version-2	gene	6090987	6093298	0.37	+	.		.	.	.	.	.	.	.	.	.	.	.	.	.	KK_halleri	KK_arenosa	High_effect_SNP	FLK	scaffold_1	6091585	stop_gained	1	0.5	.	.	.	.	.	.	.	.
AL1G26380	.	.	.	.	.	.	.	Blast: ankyrin repeat-containing protein BDA1-like [Brassica napus] (60% identity)	.	.	scaffold_1	version-2	gene	6093357	6094128	0.05	+	.		.	.	.	.	.	.	.	.	.	.	.	.	.	KK_halleri	KK_arenosa	Indel	FLK	.	.	.	.	.	scaffold_1	6093480	0	0.714286	frameshift_variant&stop_gained	scaffold_1	6093481	frameshift_variant&stop_gained
AL4G23770	AT2G29210	817470	OG0007933	.	protein_coding	splicing factor PWI domain-containing protein	.	splicing factor PWI domain-containing protein%3B INVOLVED IN: R splicing%3B EXPRESSED IN: 23 plant structures%3B EXPRESSED DURING: 13 growth stages%3B CONTAINS InterPro DOMAIN/s: Splicing factor PWI (InterPro:IPR002483)%3B BEST Arabidopsis thaliana protein match is: Polynucleotidyl transferase%2C ribonuclease H-like superfamily protein (TAIR:AT3G12440.1)%3B Has 159601 Blast hits to 84623 proteins…	.	splicing factor PWI domain-containing protein%3B INVOLVED IN: R splicing%3B EXPRESSED IN: 23 plant structures%3B EXPRESSED DURING: 13 growth stages%3B CONTAINS InterPro DOMAIN/s: Splicing factor PWI (InterPro:IPR002483)%3B BEST Arabidopsis thaliana protein match is: Polynucleotidyl transferase%2C ribonuclease H-like superfamily protein (TAIR:AT3G12440.1)%3B Has 159601 Blast hits to 84623 proteins…	scaffold_4	version-2	gene	13436651	13441312	0.58	+	.		.	.	.	.	.	.	.	.	.	.	.	.	.	KK_halleri	KK_arenosa	High_effect_SNP	FST	scaffold_4	13441142	splice_acceptor_variant&intron_variant	0	0.571429	.	.	.	.	.	.	.	.
AL4G29500	AT4G38940	.	OG0001857	.	protein_coding	Galactose oxidase/kelch repeat superfamily protein	.	Galactose oxidase/kelch repeat superfamily protein%3B CONTAINS InterPro DOMAIN/s: F-box domain%2C cyclin-like (InterPro:IPR001810)%2C Galactose oxidase/kelch%2C beta-propeller (InterPro:IPR011043)%2C Kelch repeat type 1 (InterPro:IPR006652)%2C Kelch related (InterPro:IPR013089)%2C Kelch-type beta propeller (InterPro:IPR015915)%3B BEST Arabidopsis thaliana protein match is: Galactose oxidase/kelch…	.	Galactose oxidase/kelch repeat superfamily protein%3B CONTAINS InterPro DOMAIN/s: F-box domain%2C cyclin-like (InterPro:IPR001810)%2C Galactose oxidase/kelch%2C beta-propeller (InterPro:IPR011043)%2C Kelch repeat type 1 (InterPro:IPR006652)%2C Kelch related (InterPro:IPR013089)%2C Kelch-type beta propeller (InterPro:IPR015915)%3B BEST Arabidopsis thaliana protein match is: Galactose oxidase/kelch…	scaffold_4	version-2	gene	16018081	16019562	0.23	-	.		.	.	.	.	.	.	.	.	.	.	.	.	.	KK_halleri	KK_arenosa	High_effect_SNP	Indel	scaffold_4	16018702	stop_gained	0	0.428571	scaffold_4	16019454	0.1	0.642857	frameshift_variant	scaffold_4	16019455	frameshift_variant
AL4G29500	AT4G38940	.	OG0001857	.	protein_coding	Galactose oxidase/kelch repeat superfamily protein	.	Galactose oxidase/kelch repeat superfamily protein%3B CONTAINS InterPro DOMAIN/s: F-box domain%2C cyclin-like (InterPro:IPR001810)%2C Galactose oxidase/kelch%2C beta-propeller (InterPro:IPR011043)%2C Kelch repeat type 1 (InterPro:IPR006652)%2C Kelch related (InterPro:IPR013089)%2C Kelch-type beta propeller (InterPro:IPR015915)%3B BEST Arabidopsis thaliana protein match is: Galactose oxidase/kelch…	.	Galactose oxidase/kelch repeat superfamily protein%3B CONTAINS InterPro DOMAIN/s: F-box domain%2C cyclin-like (InterPro:IPR001810)%2C Galactose oxidase/kelch%2C beta-propeller (InterPro:IPR011043)%2C Kelch repeat type 1 (InterPro:IPR006652)%2C Kelch related (InterPro:IPR013089)%2C Kelch-type beta propeller (InterPro:IPR015915)%3B BEST Arabidopsis thaliana protein match is: Galactose oxidase/kelch…	scaffold_4	version-2	gene	16018081	16019562	0.23	-	.		.	.	.	.	.	.	.	.	.	.	.	.	.	KK_halleri	KK_arenosa	Indel	Indel	scaffold_4	16018702	stop_gained	0	0.428571	scaffold_4	16019454	0.1	0.642857	frameshift_variant	scaffold_4	16019455	frameshift_variant
AL5G26170	AT3G46950	823848	OG0011278	.	protein_coding	Mitochondrial transcription termination factor family protein	.	Mitochondrial transcription termination factor family protein%3B CONTAINS InterPro DOMAIN/s: Mitochodrial transcription termination factor-related (InterPro:IPR003690)%3B BEST Arabidopsis thaliana protein match is: Mitochondrial transcription termination factor family protein (TAIR:AT1G61960.1)%3B Has 1049 Blast hits to 852 proteins in 58 species: Archae - 2%3B Bacteria - 13%3B Metazoa - 40%3B Fu…	.	Mitochondrial transcription termination factor family protein%3B CONTAINS InterPro DOMAIN/s: Mitochodrial transcription termination factor-related (InterPro:IPR003690)%3B BEST Arabidopsis thaliana protein match is: Mitochondrial transcription termination factor family protein (TAIR:AT1G61960.1)%3B Has 1049 Blast hits to 852 proteins in 58 species: Archae - 2%3B Bacteria - 13%3B Metazoa - 40%3B Fu…	scaffold_5	version-2	gene	12987412	12989006	0.05	+	.		.	.	.	.	.	.	.	.	.	.	.	.	.	KK_halleri	KK_arenosa	High_effect_SNP	AFDabs	scaffold_5	12988515	splice_acceptor_variant&intron_variant	0	0.571429	.	.	.	.	.	.	.	.
AL5G26170	AT3G46950	823848	OG0011278	.	protein_coding	Mitochondrial transcription termination factor family protein	.	Mitochondrial transcription termination factor family protein%3B CONTAINS InterPro DOMAIN/s: Mitochodrial transcription termination factor-related (InterPro:IPR003690)%3B BEST Arabidopsis thaliana protein match is: Mitochondrial transcription termination factor family protein (TAIR:AT1G61960.1)%3B Has 1049 Blast hits to 852 proteins in 58 species: Archae - 2%3B Bacteria - 13%3B Metazoa - 40%3B Fu…	.	Mitochondrial transcription termination factor family protein%3B CONTAINS InterPro DOMAIN/s: Mitochodrial transcription termination factor-related (InterPro:IPR003690)%3B BEST Arabidopsis thaliana protein match is: Mitochondrial transcription termination factor family protein (TAIR:AT1G61960.1)%3B Has 1049 Blast hits to 852 proteins in 58 species: Archae - 2%3B Bacteria - 13%3B Metazoa - 40%3B Fu…	scaffold_5	version-2	gene	12987412	12989006	0.05	+	.		.	.	.	.	.	.	.	.	.	.	.	.	.	KK_halleri	KK_arenosa	High_effect_SNP	AFDabs	scaffold_5	12988580	stop_gained	0	0.571429	.	.	.	.	.	.	.	.
AL5G26170	AT3G46950	823848	OG0011278	.	protein_coding	Mitochondrial transcription termination factor family protein	.	Mitochondrial transcription termination factor family protein%3B CONTAINS InterPro DOMAIN/s: Mitochodrial transcription termination factor-related (InterPro:IPR003690)%3B BEST Arabidopsis thaliana protein match is: Mitochondrial transcription termination factor family protein (TAIR:AT1G61960.1)%3B Has 1049 Blast hits to 852 proteins in 58 species: Archae - 2%3B Bacteria - 13%3B Metazoa - 40%3B Fu…	.	Mitochondrial transcription termination factor family protein%3B CONTAINS InterPro DOMAIN/s: Mitochodrial transcription termination factor-related (InterPro:IPR003690)%3B BEST Arabidopsis thaliana protein match is: Mitochondrial transcription termination factor family protein (TAIR:AT1G61960.1)%3B Has 1049 Blast hits to 852 proteins in 58 species: Archae - 2%3B Bacteria - 13%3B Metazoa - 40%3B Fu…	scaffold_5	version-2	gene	12987412	12989006	0.05	+	.		.	.	.	.	.	.	.	.	.	.	.	.	.	KK_halleri	KK_arenosa	High_effect_SNP	AFDabs	scaffold_5	12987936	stop_gained	0	0.571429	.	.	.	.	.	.	.	.
AL6G35130	.	.	OG0021766	.	.	.	.	Blast: hypothetical protein CARUB_v10003055mg, partial [Capsella rubella] (64% identity)	.	.	scaffold_6	version-2	gene	10218871	10220714	0.18	+	.		.	.	.	.	.	.	.	.	.	.	.	.	.	KK_halleri	KK_arenosa	High_effect_SNP	AFDabs	scaffold_6	10220499	stop_gained	0	0.428571	.	.	.	.	.	.	.	.
AL7G10480	.	.	.	.	.	.	.	Blast: PREDICTED: beta-galactosidase 14 [Camelina sativa] (55% identity)	.	.	scaffold_7	version-2	gene	155606	158210	0.04	+	.		.	.	.	.	.	.	.	.	.	.	.	.	.	KK_halleri	KK_arenosa	Indel	Indel	.	.	.	.	.	scaffold_7	156364	0	0.571429	frameshift_variant&stop_gained	scaffold_7	156424	frameshift_variant
AL7G10480	.	.	.	.	.	.	.	Blast: PREDICTED: beta-galactosidase 14 [Camelina sativa] (55% identity)	.	.	scaffold_7	version-2	gene	155606	158210	0.04	+	.		.	.	.	.	.	.	.	.	.	.	.	.	.	KK_halleri	KK_arenosa	Indel	Indel	.	.	.	.	.	scaffold_7	157700	0.1	0.785714	frameshift_variant	scaffold_7	157701	frameshift_variant
AL7G35050	AT4G19050	827643	OG0012696	.	protein_coding	NB-ARC domain-containing disease resistance protein	.	NB-ARC domain-containing disease resistance protein%3B FUNCTIONS IN: ATP binding%3B INVOLVED IN: defense response%2C apoptosis%3B LOCATED IN: cellular_component unknown%3B EXPRESSED IN: 20 plant structures%3B EXPRESSED DURING: 9 growth stages%3B CONTAINS InterPro DOMAIN/s: NB-ARC (InterPro:IPR002182)%2C Disease resistance protein (InterPro:IPR000767)%3B BEST Arabidopsis thaliana protein match is:…	.	NB-ARC domain-containing disease resistance protein%3B FUNCTIONS IN: ATP binding%3B INVOLVED IN: defense response%2C apoptosis%3B LOCATED IN: cellular_component unknown%3B EXPRESSED IN: 20 plant structures%3B EXPRESSED DURING: 9 growth stages%3B CONTAINS InterPro DOMAIN/s: NB-ARC (InterPro:IPR002182)%2C Disease resistance protein (InterPro:IPR000767)%3B BEST Arabidopsis thaliana protein match is:…	scaffold_7	version-2	gene	10413878	10418226	0.61	+	.	GWAS association with H2O2 stress [Sahukhan et al. 2017]	.	.	.	.	.	.	.	.	.	.	.	.	.	KK_halleri	KK_arenosa	High_effect_SNP	FST	scaffold_7	10415702	stop_gained	1	0.142857	.	.	.	.	.	.	.	.
AL7G39640	.	.	OG0021232	.	.	.	.	Blast: protein SRC2 homolog [Eutrema salsugineum] (67% identity)	.	.	scaffold_7	version-2	gene	12693132	12694815	0.39	+	.		.	.	.	.	.	.	.	.	.	.	.	.	.	KK_halleri	KK_arenosa	Indel	NIELSEN	.	.	.	.	.	scaffold_7	12693485	0	0.642857	frameshift_variant	scaffold_7	12693486	frameshift_variant
AL7G44170	AT5G35370	833498	OG0017360	.	protein_coding	S-locus lectin protein kinase family protein	.	S-locus lectin protein kinase family protein%3B FUNCTIONS IN: in 6 functions%3B INVOLVED IN: protein amino acid phosphorylation%3B LOCATED IN: endomembrane system%3B EXPRESSED IN: 11 plant structures%3B EXPRESSED DURING: 6 growth stages%3B CONTAINS InterPro DOMAIN/s: Curculin-like (mannose-binding) lectin (InterPro:IPR001480)%2C Protein kinase%2C ATP binding site (InterPro:IPR017441)%2C Serine/th…	.	S-locus lectin protein kinase family protein%3B FUNCTIONS IN: in 6 functions%3B INVOLVED IN: protein amino acid phosphorylation%3B LOCATED IN: endomembrane system%3B EXPRESSED IN: 11 plant structures%3B EXPRESSED DURING: 6 growth stages%3B CONTAINS InterPro DOMAIN/s: Curculin-like (mannose-binding) lectin (InterPro:IPR001480)%2C Protein kinase%2C ATP binding site (InterPro:IPR017441)%2C Serine/th…	scaffold_7	version-2	gene	18186559	18189363	0.04	-	.		.	.	.	.	.	.	.	.	.	.	.	.	.	KK_halleri	KK_arenosa	High_effect_SNP	High_effect_SNP	scaffold_7	18188302	stop_gained	0.1	0.571429	.	.	.	.	.	.	.	.
AL7G44850	AT1G52100	833584	OG0001531	.	protein_coding	Mannose-binding lectin superfamily protein	.	Mannose-binding lectin superfamily protein%3B FUNCTIONS IN: molecular_function unknown%3B INVOLVED IN: biological_process unknown%3B LOCATED IN: membrane%3B EXPRESSED IN: shoot%2C cotyledon%2C hypocotyl%2C leaf%3B CONTAINS InterPro DOMAIN/s: Mannose-binding lectin (InterPro:IPR001229)%3B BEST Arabidopsis thaliana protein match is: Mannose-binding lectin superfamily protein (TAIR:AT5G35940.1)%3B H…	.	Mannose-binding lectin superfamily protein%3B FUNCTIONS IN: molecular_function unknown%3B INVOLVED IN: biological_process unknown%3B LOCATED IN: membrane%3B EXPRESSED IN: shoot%2C cotyledon%2C hypocotyl%2C leaf%3B CONTAINS InterPro DOMAIN/s: Mannose-binding lectin (InterPro:IPR001229)%3B BEST Arabidopsis thaliana protein match is: Mannose-binding lectin superfamily protein (TAIR:AT5G35940.1)%3B H…	scaffold_7	version-2	gene	18916124	18918254	0.53	+	.		.	.	.	.	.	.	.	.	.	.	.	.	.	KK_halleri	KK_arenosa	Indel	DD	.	.	.	.	.	scaffold_7	18917439	0	0.428571	frameshift_variant&stop_gained	scaffold_7	18917440	frameshift_variant&stop_gained
AL8G20240	AT5G47970	834848	OG0018851	.	protein_coding	Aldolase-type TIM barrel family protein	.	Aldolase-type TIM barrel family protein%3B FUNCTIONS IN: tR dihydrouridine synthase activity%2C FAD binding%2C catalytic activity%3B INVOLVED IN: regulation of nitrogen utilization%2C tR processing%2C oxidation reduction%2C metabolic process%3B LOCATED IN: nucleus%2C cytoplasm%2C phragmoplast%3B EXPRESSED IN: 21 plant structures%3B EXPRESSED DURING: 13 growth stages%3B CONTAINS InterPro DOMAIN/s:…	.	Aldolase-type TIM barrel family protein%3B FUNCTIONS IN: tR dihydrouridine synthase activity%2C FAD binding%2C catalytic activity%3B INVOLVED IN: regulation of nitrogen utilization%2C tR processing%2C oxidation reduction%2C metabolic process%3B LOCATED IN: nucleus%2C cytoplasm%2C phragmoplast%3B EXPRESSED IN: 21 plant structures%3B EXPRESSED DURING: 13 growth stages%3B CONTAINS InterPro DOMAIN/s:…	scaffold_8	version-2	gene	10497424	10500478	0.37	-	.		.	.	.	.	.	.	.	.	.	.	.	.	.	KK_halleri	KK_arenosa	High_effect_SNP	NIELSEN	scaffold_8	10498593	splice_donor_variant&intron_variant	1	0	.	.	.	.	.	.	.	.
AL8G20240	AT5G47970	834848	OG0018851	.	protein_coding	Aldolase-type TIM barrel family protein	.	Aldolase-type TIM barrel family protein%3B FUNCTIONS IN: tR dihydrouridine synthase activity%2C FAD binding%2C catalytic activity%3B INVOLVED IN: regulation of nitrogen utilization%2C tR processing%2C oxidation reduction%2C metabolic process%3B LOCATED IN: nucleus%2C cytoplasm%2C phragmoplast%3B EXPRESSED IN: 21 plant structures%3B EXPRESSED DURING: 13 growth stages%3B CONTAINS InterPro DOMAIN/s:…	.	Aldolase-type TIM barrel family protein%3B FUNCTIONS IN: tR dihydrouridine synthase activity%2C FAD binding%2C catalytic activity%3B INVOLVED IN: regulation of nitrogen utilization%2C tR processing%2C oxidation reduction%2C metabolic process%3B LOCATED IN: nucleus%2C cytoplasm%2C phragmoplast%3B EXPRESSED IN: 21 plant structures%3B EXPRESSED DURING: 13 growth stages%3B CONTAINS InterPro DOMAIN/s:…	scaffold_8	version-2	gene	10497424	10500478	0.37	-	.		.	.	.	.	.	.	.	.	.	.	.	.	.	KK_halleri	KK_arenosa	FLK	NIELSEN	scaffold_8	10498593	splice_donor_variant&intron_variant	1	0	.	.	.	.	.	.	.	.
AL8G24450	AT5G50345	5008303	OG0022990	.	protein_coding	maternally expressed family protein	.	Maternally expressed gene (MEG) family protein%3B LOCATED IN: endomembrane system%3B BEST Arabidopsis thaliana protein match is: Maternally expressed gene (MEG) family protein (TAIR:AT1G10747.1)%3B Has 16 Blast hits to 16 proteins in 2 species: Archae - 0%3B Bacteria - 0%3B Metazoa - 0%3B Fungi - 0%3B Plants - 16%3B Viruses - 0%3B Other Eukaryotes - 0 (source: NCBI BLink).	Encodes a Maternally expressed gene (MEG) family protein	Maternally expressed gene (MEG) family protein%3B LOCATED IN: endomembrane system%3B BEST Arabidopsis thaliana protein match is: Maternally expressed gene (MEG) family protein (TAIR:AT1G10747.1)%3B Has 16 Blast hits to 16 proteins in 2 species: Archae - 0%3B Bacteria - 0%3B Metazoa - 0%3B Fungi - 0%3B Plants - 16%3B Viruses - 0%3B Other Eukaryotes - 0 (source: NCBI BLink).	scaffold_8	version-2	gene	13883838	13884342	.	+	.		.	.	.	.	.	.	.	.	.	.	.	.	.	KK_halleri	KK_arenosa	Indel	Indel	.	.	.	.	.	scaffold_8	13884218	0	0.5	frameshift_variant	scaffold_8	13884219	frameshift_variant
AL3G10670	AT3G01500	821134	OG0001853	CA1	protein_coding	carbonic anhydrase 1	carbonic anhydrase 1	computational_carbonic anhydrase 1 (CA1)%3B FUNCTIONS IN: carbonate dehydratase activity%2C zinc ion binding%3B INVOLVED IN: in 6 processes%3B LOCATED IN: in 8 components%3B EXPRESSED IN: 22 plant structures%3B EXPRESSED DURING: 14 growth stages%3B CONTAINS InterPro DOMAIN/s: Carbonic anhydrase%2C prokaryotic-like%2C conserved site (InterPro:IPR015892)%2C Carbonic anhydrase (InterPro:IPR001765)%3…	Encodes a putative beta-carbonic anhydrase betaCA1. Together with betaCA4 (At1g70410) regulates CO2-controlled stomatal movements in guard cells.	carbonic anhydrase 1 (CA1)%3B FUNCTIONS IN: carbonate dehydratase activity%2C zinc ion binding%3B INVOLVED IN: in 6 processes%3B LOCATED IN: in 8 components%3B EXPRESSED IN: 22 plant structures%3B EXPRESSED DURING: 14 growth stages%3B CONTAINS InterPro DOMAIN/s: Carbonic anhydrase%2C prokaryotic-like%2C conserved site (InterPro:IPR015892)%2C Carbonic anhydrase (InterPro:IPR001765)%3B BEST Arabido…	scaffold_3	version-2	gene	208103	211842	2.1	+	.		.	.	.	.	.	.	.	.	.	.	.	.	.	MZ_halleri	MZ_arenosa	Indel	Indel	.	.	.	.	.	scaffold_3	211563	0.0625	0.5	frameshift_variant	scaffold_3	211564	frameshift_variant
AL5G26930	AT3G47640	823918	OG0011316	PYE	protein_coding	basic helix-loop-helix (bHLH) DNA-binding superfamily protein	POPEYE	computational_POPEYE (PYE)%3B FUNCTIONS IN: DNA binding%2C sequence-specific DNA binding transcription factor activity%3B INVOLVED IN: cellular response to iron ion starvation%2C iron ion homeostasis%2C regulation of transcription%3B LOCATED IN: nucleus%2C chloroplast%3B EXPRESSED IN: 23 plant structures%3B EXPRESSED DURING: 13 growth stages%3B CONTAINS InterPro DOMAIN/s: Helix-loop-helix DNA-bin…	Encodes POPEYE (PYE)%2C a bHLH transcription factor regulating response to iron deficiency in Arabidopsis roots.	POPEYE (PYE)%3B FUNCTIONS IN: DNA binding%2C sequence-specific DNA binding transcription factor activity%3B INVOLVED IN: cellular response to iron ion starvation%2C iron ion homeostasis%2C regulation of transcription%3B LOCATED IN: nucleus%2C chloroplast%3B EXPRESSED IN: 23 plant structures%3B EXPRESSED DURING: 13 growth stages%3B CONTAINS InterPro DOMAIN/s: Helix-loop-helix DNA-binding domain (I…	scaffold_5	version-2	gene	13391374	13393088	0.25	+	.		183	AtPYE	POPEYE, bHLH transcription factor important in root Fe deficiency response in pericycle	.	.	.	.	.	.	.	Fe	.	.	MZ_halleri	MZ_arenosa	Indel	FLK	.	.	.	.	.	scaffold_5	13392874	0	1	frameshift_variant	scaffold_5	13392875	frameshift_variant
AL5G26930	AT3G47640	823918	OG0011316	PYE	protein_coding	basic helix-loop-helix (bHLH) DNA-binding superfamily protein	POPEYE	computational_POPEYE (PYE)%3B FUNCTIONS IN: DNA binding%2C sequence-specific DNA binding transcription factor activity%3B INVOLVED IN: cellular response to iron ion starvation%2C iron ion homeostasis%2C regulation of transcription%3B LOCATED IN: nucleus%2C chloroplast%3B EXPRESSED IN: 23 plant structures%3B EXPRESSED DURING: 13 growth stages%3B CONTAINS InterPro DOMAIN/s: Helix-loop-helix DNA-bin…	Encodes POPEYE (PYE)%2C a bHLH transcription factor regulating response to iron deficiency in Arabidopsis roots.	POPEYE (PYE)%3B FUNCTIONS IN: DNA binding%2C sequence-specific DNA binding transcription factor activity%3B INVOLVED IN: cellular response to iron ion starvation%2C iron ion homeostasis%2C regulation of transcription%3B LOCATED IN: nucleus%2C chloroplast%3B EXPRESSED IN: 23 plant structures%3B EXPRESSED DURING: 13 growth stages%3B CONTAINS InterPro DOMAIN/s: Helix-loop-helix DNA-binding domain (I…	scaffold_5	version-2	gene	13391374	13393088	0.25	+	.		183	AtPYE	POPEYE, bHLH transcription factor important in root Fe deficiency response in pericycle	.	.	.	.	.	.	.	Fe	.	.	MZ_halleri	MZ_arenosa	FST	FLK	.	.	.	.	.	scaffold_5	13392874	0	1	frameshift_variant	scaffold_5	13392875	frameshift_variant
AL5G26940	AT3G47650	823919	OG0011317	.	protein_coding	DnaJ/Hsp40 cysteine-rich domain superfamily protein	.	computational_DnaJ/Hsp40 cysteine-rich domain superfamily protein%3B FUNCTIONS IN: unfolded protein binding%2C heat shock protein binding%3B INVOLVED IN: protein folding%3B LOCATED IN: chloroplast%3B EXPRESSED IN: 23 plant structures%3B EXPRESSED DURING: 13 growth stages%3B CONTAINS InterPro DOMAIN/s: Heat shock protein DnaJ%2C cysteine-rich domain (InterPro:IPR001305)%3B Has 88 Blast hits to 88 …	.	DnaJ/Hsp40 cysteine-rich domain superfamily protein%3B FUNCTIONS IN: unfolded protein binding%2C heat shock protein binding%3B INVOLVED IN: protein folding%3B LOCATED IN: chloroplast%3B EXPRESSED IN: 23 plant structures%3B EXPRESSED DURING: 13 growth stages%3B CONTAINS InterPro DOMAIN/s: Heat shock protein DnaJ%2C cysteine-rich domain (InterPro:IPR001305)%3B Has 88 Blast hits to 88 proteins in 28…	scaffold_5	version-2	gene	13393284	13394320	0.23	+	.		.	.	.	.	.	.	.	.	.	.	.	.	.	MZ_halleri	MZ_arenosa	FST	Indel	.	.	.	.	.	.	.	.	.	.	.	.	.
AL5G26940	AT3G47650	823919	OG0011317	.	protein_coding	DnaJ/Hsp40 cysteine-rich domain superfamily protein	.	computational_DnaJ/Hsp40 cysteine-rich domain superfamily protein%3B FUNCTIONS IN: unfolded protein binding%2C heat shock protein binding%3B INVOLVED IN: protein folding%3B LOCATED IN: chloroplast%3B EXPRESSED IN: 23 plant structures%3B EXPRESSED DURING: 13 growth stages%3B CONTAINS InterPro DOMAIN/s: Heat shock protein DnaJ%2C cysteine-rich domain (InterPro:IPR001305)%3B Has 88 Blast hits to 88 …	.	DnaJ/Hsp40 cysteine-rich domain superfamily protein%3B FUNCTIONS IN: unfolded protein binding%2C heat shock protein binding%3B INVOLVED IN: protein folding%3B LOCATED IN: chloroplast%3B EXPRESSED IN: 23 plant structures%3B EXPRESSED DURING: 13 growth stages%3B CONTAINS InterPro DOMAIN/s: Heat shock protein DnaJ%2C cysteine-rich domain (InterPro:IPR001305)%3B Has 88 Blast hits to 88 proteins in 28…	scaffold_5	version-2	gene	13393284	13394320	0.23	+	.		.	.	.	.	.	.	.	.	.	.	.	.	.	MZ_halleri	MZ_arenosa	FST	FLK	.	.	.	.	.	.	.	.	.	.	.	.	.
AL1G11540	AT3G04430	819598	OG0004830	NAC049	protein_coding	NAC domain containing protein 49	NAC domain containing protein 49	NAC domain containing protein 49 (NAC049)%3B FUNCTIONS IN: sequence-specific D binding transcription factor activity%3B INVOLVED IN: multicellular organismal development%2C regulation of transcription%3B LOCATED IN: cellular_component unknown%3B CONTAINS InterPro DOMAIN/s: No apical meristem (M) protein (InterPro:IPR003441)%3B BEST Arabidopsis thaliana protein match is: C domain containing protei…	.	NAC domain containing protein 49 (NAC049)%3B FUNCTIONS IN: sequence-specific DNA binding transcription factor activity%3B INVOLVED IN: multicellular organismal development%2C regulation of transcription%3B LOCATED IN: cellular_component unknown%3B CONTAINS InterPro DOMAIN/s: No apical meristem (NAM) protein (InterPro:IPR003441)%3B BEST Arabidopsis thaliana protein match is: NAC domain containing …	scaffold_1	version-2	gene	546617	548110	.	+	.		.	.	.	.	.	.	.	.	.	.	.	.	.	KK_halleri	MZ_halleri	KK_higheffectSNP	MZ_higheffectSNP	scaffold_1	547761	splice_donor_variant&intron_variant	0.95	0.5	.	.	.	.	.	.	.	.
AL1G18500	AT1G08125	2745748	OG0014237	.	protein_coding	S-adenosyl-L-methionine-dependent methyltransferases superfamily protein	.	S-adenosyl-L-methionine-dependent methyltransferases superfamily protein%3B CONTAINS InterPro DOMAIN/s: Methyltransferase-16%2C putative (InterPro:IPR019410)%3B BEST Arabidopsis thaliana protein match is: S-adenosyl-L-methionine-dependent methyltransferases superfamily protein (TAIR:AT1G73320.1)%3B Has 35333 Blast hits to 34131 proteins in 2444 species: Archae - 798%3B Bacteria - 22429%3B Metazoa…	.	S-adenosyl-L-methionine-dependent methyltransferases superfamily protein%3B CONTAINS InterPro DOMAIN/s: Methyltransferase-16%2C putative (InterPro:IPR019410)%3B BEST Arabidopsis thaliana protein match is: S-adenosyl-L-methionine-dependent methyltransferases superfamily protein (TAIR:AT1G73320.1)%3B Has 35333 Blast hits to 34131 proteins in 2444 species: Archae - 798%3B Bacteria - 22429%3B Metazoa…	scaffold_1	version-2	gene	3031682	3034564	0.52	-	.		.	.	.	.	.	.	.	.	.	.	.	.	.	KK_halleri	MZ_halleri	KK_INDEL	MZ_INDEL	.	.	.	.	.	scaffold_1	3032620	0	0.714286	splice_acceptor_variant&intron_variant	scaffold_1	3032621	splice_acceptor_variant&intron_variant
AL1G26370	AT1G14470	838009	OG0009622	.	protein_coding	Pentatricopeptide repeat (PPR) superfamily protein	.	Pentatricopeptide repeat (PPR) superfamily protein%3B CONTAINS InterPro DOMAIN/s: Pentatricopeptide repeat (InterPro:IPR002885)%3B BEST Arabidopsis thaliana protein match is: Tetratricopeptide repeat (TPR)-like superfamily protein (TAIR:AT1G08070.1)%3B Has 45588 Blast hits to 14013 proteins in 255 species: Archae - 1%3B Bacteria - 22%3B Metazoa - 282%3B Fungi - 244%3B Plants - 44188%3B Viruses - …	.	Pentatricopeptide repeat (PPR) superfamily protein%3B CONTAINS InterPro DOMAIN/s: Pentatricopeptide repeat (InterPro:IPR002885)%3B BEST Arabidopsis thaliana protein match is: Tetratricopeptide repeat (TPR)-like superfamily protein (TAIR:AT1G08070.1)%3B Has 45588 Blast hits to 14013 proteins in 255 species: Archae - 1%3B Bacteria - 22%3B Metazoa - 282%3B Fungi - 244%3B Plants - 44188%3B Viruses - …	scaffold_1	version-2	gene	6090987	6093298	0.37	+	.		.	.	.	.	.	.	.	.	.	.	.	.	.	KK_halleri	MZ_halleri	KK_higheffectSNP	AFDabs	scaffold_1	6092675	stop_lost	1	0.357143	.	.	.	.	.	.	.	.
AL1G26380	.	.	.	.	.	.	.	Blast: ankyrin repeat-containing protein BDA1-like [Brassica napus] (60% identity)	.	.	scaffold_1	version-2	gene	6093357	6094128	0.05	+	.		.	.	.	.	.	.	.	.	.	.	.	.	.	KK_halleri	MZ_halleri	KK_INDEL	MZ_INDEL	.	.	.	.	.	scaffold_1	6093480	0	0.714286	frameshift_variant&stop_gained	scaffold_1	6093481	frameshift_variant&stop_gained
AL1G34410	AT1G21320	.	OG0011639	.	protein_coding	nucleic acid/nucleotide binding protein	.	nucleotide binding%3Bnucleic acid binding%3B FUNCTIONS IN: nucleotide binding%2C nucleic acid binding%3B INVOLVED IN: biological_process unknown%3B LOCATED IN: cellular_component unknown%3B EXPRESSED IN: flower%2C cultured cell%3B EXPRESSED DURING: petal differentiation and expansion stage%3B CONTAINS InterPro DOMAIN/s: R recognition motif%2C RNP-1 (InterPro:IPR000504)%2C Nucleotide-binding%2C al…	.	.	scaffold_1	version-2	gene	9191654	9193993	0.15	-	.		.	.	.	.	.	.	.	.	.	.	.	.	.	KK_halleri	MZ_halleri	FLK	MZ_INDEL	scaffold_1	9192319	stop_gained	0	1	scaffold_1	9192023	1	0	frameshift_variant	scaffold_1	9192024	frameshift_variant
AL1G44260	AT1G30320	839912	OG0016870	.	protein_coding	Remorin family protein	.	Remorin family protein%3B FUNCTIONS IN: D binding%3B LOCATED IN: plasma membrane%3B CONTAINS InterPro DOMAIN/s: Remorin%2C C-terminal (InterPro:IPR005516)%3B BEST Arabidopsis thaliana protein match is: Remorin family protein (TAIR:AT2G02170.2)%3B Has 12397 Blast hits to 7447 proteins in 1066 species: Archae - 25%3B Bacteria - 2897%3B Metazoa - 2750%3B Fungi - 978%3B Plants - 862%3B Viruses - 38%3…	.	Remorin family protein%3B FUNCTIONS IN: DNA binding%3B LOCATED IN: plasma membrane%3B CONTAINS InterPro DOMAIN/s: Remorin%2C C-terminal (InterPro:IPR005516)%3B BEST Arabidopsis thaliana protein match is: Remorin family protein (TAIR:AT2G02170.2)%3B Has 12397 Blast hits to 7447 proteins in 1066 species: Archae - 25%3B Bacteria - 2897%3B Metazoa - 2750%3B Fungi - 978%3B Plants - 862%3B Viruses - 38…	scaffold_1	version-2	gene	13482130	13484984	0.28	+	.		.	.	.	.	.	.	.	.	.	.	.	.	.	KK_halleri	MZ_halleri	KK_INDEL	MZ_INDEL	.	.	.	.	.	scaffold_1	13484514	0	0.571429	splice_acceptor_variant&intron_variant	scaffold_1	13484515	splice_acceptor_variant&intron_variant
AL1G48840	AT1G34260	840326	OG0019735	FAB1D	protein_coding	FORMS APLOID AND BINUCLEATE CELLS 1A	FORMS APLOID AND BINUCLEATE CELLS 1A	FORMS APLOID AND BINUCLEATE CELLS 1A (FAB1D)%3B FUNCTIONS IN: 1-phosphatidylinositol-4-phosphate 5-kinase activity%2C phosphatidylinositol phosphate kinase activity%2C ATP binding%3B INVOLVED IN: phosphatidylinositol metabolic process%2C cellular protein metabolic process%3B LOCATED IN: cellular_component unknown%3B EXPRESSED IN: 25 plant structures%3B EXPRESSED DURING: 15 growth stages%3B CONTAI…	Encodes a protein that is predicted to act as a phosphatidylinositol-3P 5-kinase%2C but%2C because it lacks a FYVE domain%2C it is unlikely to be efficiently targeted to membranes containing the porposed phosphatidylinositol-3P substrate. Therefore%2C its molecular function remains unknown.	FORMS APLOID AND BINUCLEATE CELLS 1A (FAB1D)%3B FUNCTIONS IN: 1-phosphatidylinositol-4-phosphate 5-kinase activity%2C phosphatidylinositol phosphate kinase activity%2C ATP binding%3B INVOLVED IN: phosphatidylinositol metabolic process%2C cellular protein metabolic process%3B LOCATED IN: cellular_component unknown%3B EXPRESSED IN: 25 plant structures%3B EXPRESSED DURING: 15 growth stages%3B CONTAI…	scaffold_1	version-2	gene	16117307	16123442	.	+	.		.	.	.	.	.	.	.	.	.	.	.	.	.	KK_halleri	MZ_halleri	KK_higheffectSNP	MZ_higheffectSNP	scaffold_1	16118073	stop_gained	0	0.785714	.	.	.	.	.	.	.	.
AL1G60300	AT1G52190	841649	OG0012580	.	protein_coding	Major facilitator superfamily protein	.	Major facilitator superfamily protein%3B FUNCTIONS IN: transporter activity%3B INVOLVED IN: oligopeptide transport%3B LOCATED IN: membrane%3B EXPRESSED IN: 22 plant structures%3B EXPRESSED DURING: 13 growth stages%3B CONTAINS InterPro DOMAIN/s: Oligopeptide transporter (InterPro:IPR000109)%2C Major facilitator superfamily%2C general substrate transporter (InterPro:IPR016196)%3B BEST Arabidopsis t…	Encodes a low affinity nitrate transporter that is expressed in the plasma membrane and found in the phloem of the major veins of leaves. It is responsible for nitrate redistribution to young leaves.	Major facilitator superfamily protein%3B FUNCTIONS IN: transporter activity%3B INVOLVED IN: oligopeptide transport%3B LOCATED IN: membrane%3B EXPRESSED IN: 22 plant structures%3B EXPRESSED DURING: 13 growth stages%3B CONTAINS InterPro DOMAIN/s: Oligopeptide transporter (InterPro:IPR000109)%2C Major facilitator superfamily%2C general substrate transporter (InterPro:IPR016196)%3B BEST Arabidopsis t…	scaffold_1	version-2	gene	27750347	27754841	0.14	+	.	downregulated under Cd stress in supplementary of Li et al., 2010; nitrate transporter	.	.	.	.	.	.	.	.	.	.	.	.	.	KK_halleri	MZ_halleri	KK_INDEL	MZ_INDEL	.	.	.	.	.	scaffold_1	27750585	0	0.428571	splice_donor_variant&intron_variant	scaffold_1	27750586	splice_donor_variant&intron_variant
AL2G11810	AT1G63420	842648	OG0016515	.	protein_coding	O-glucosyltransferase-like protein (DUF821)	.	CONTAINS InterPro DOMAIN/s: Lipopolysaccharide-modifying protein (InterPro:IPR006598)%2C Protein of unknown function DUF821%2C CAP10-like (InterPro:IPR008539)%3B BEST Arabidopsis thaliana protein match is: Arabidopsis thaliana protein of unknown function (DUF821) (TAIR:AT3G48980.1)%3B Has 676 Blast hits to 667 proteins in 137 species: Archae - 0%3B Bacteria - 46%3B Metazoa - 225%3B Fungi - 109%3B…	.	CONTAINS InterPro DOMAIN/s: Lipopolysaccharide-modifying protein (InterPro:IPR006598)%2C Protein of unknown function DUF821%2C CAP10-like (InterPro:IPR008539)%3B BEST Arabidopsis thaliana protein match is: Arabidopsis thaliana protein of unknown function (DUF821) (TAIR:AT3G48980.1)%3B Has 676 Blast hits to 667 proteins in 137 species: Archae - 0%3B Bacteria - 46%3B Metazoa - 225%3B Fungi - 109%3B…	scaffold_2	version-2	gene	884362	887580	0.34	-	.		.	.	.	.	.	.	.	.	.	.	.	.	.	KK_halleri	MZ_halleri	KK_INDEL	MZ_INDEL	.	.	.	.	.	scaffold_2	884481	1	0.428571	frameshift_variant&stop_lost	scaffold_2	884482	frameshift_variant&stop_lost
AL2G13180	.	.	OG0015036	.	.	.	.	Blast: BnaC09g13180D [Brassica napus] (85% identity)	.	.	scaffold_2	version-2	gene	1577465	1578643	0.11	+	.		.	.	.	.	.	.	.	.	.	.	.	.	.	KK_halleri	MZ_halleri	KK_higheffectSNP	MZ_higheffectSNP	scaffold_2	1578312	stop_gained	1	0	.	.	.	.	.	.	.	.
AL2G19410	AT1G64910	842800	OG0000381	.	protein_coding	UDP-Glycosyltransferase superfamily protein	.	UDP-Glycosyltransferase superfamily protein%3B FUNCTIONS IN: transferase activity%2C transferring glycosyl groups%3B INVOLVED IN: metabolic process%3B EXPRESSED IN: 10 plant structures%3B EXPRESSED DURING: 7 growth stages%3B CONTAINS InterPro DOMAIN/s: UDP-glucuronosyl/UDP-glucosyltransferase (InterPro:IPR002213)%3B BEST Arabidopsis thaliana protein match is: UDP-Glycosyltransferase superfamily p…	.	UDP-Glycosyltransferase superfamily protein%3B FUNCTIONS IN: transferase activity%2C transferring glycosyl groups%3B INVOLVED IN: metabolic process%3B LOCATED IN: cellular_component unknown%3B EXPRESSED IN: root%3B CONTAINS InterPro DOMAIN/s: UDP-glucuronosyl/UDP-glucosyltransferase (InterPro:IPR002213)%3B BEST Arabidopsis thaliana protein match is: UDP-Glycosyltransferase superfamily protein (TA…	scaffold_2	version-2	gene	7653584	7660345	.	-	.		.	.	.	.	.	.	.	.	.	.	.	.	.	KK_halleri	MZ_halleri	KK_higheffectSNP	MZ_higheffectSNP	scaffold_2	7654309	stop_lost	0	0.857143	.	.	.	.	.	.	.	.
AL2G22120	AT1G65430	842854	OG0008781	ARI8	protein_coding	IBR domain-containing protein	ARIADNE 8	ARIADNE 8 (ARI8)%3B FUNCTIONS IN: ubiquitin-protein ligase activity%3B LOCATED IN: intracellular%3B EXPRESSED IN: 24 plant structures%3B EXPRESSED DURING: 15 growth stages%3B CONTAINS InterPro DOMAIN/s: Zinc finger%2C C6HC-type (InterPro:IPR002867)%2C Zinc finger%2C RING-type (InterPro:IPR001841)%2C Zinc finger%2C CCHC-type (InterPro:IPR001878)%2C Zinc finger%2C RanBP2-type (InterPro:IPR001876)%3…	.	ARIADNE 8 (ARI8)%3B FUNCTIONS IN: ubiquitin-protein ligase activity%3B LOCATED IN: intracellular%3B EXPRESSED IN: 24 plant structures%3B EXPRESSED DURING: 15 growth stages%3B CONTAINS InterPro DOMAIN/s: Zinc finger%2C C6HC-type (InterPro:IPR002867)%2C Zinc finger%2C RING-type (InterPro:IPR001841)%2C Zinc finger%2C CCHC-type (InterPro:IPR001878)%2C Zinc finger%2C RanBP2-type (InterPro:IPR001876)%3…	scaffold_2	version-2	gene	9423657	9429430	0.27	-	.		.	.	.	.	.	.	.	.	.	.	.	.	.	KK_halleri	MZ_halleri	DXY	DXY	.	.	.	.	.	.	.	.	.	.	.	.	.
AL2G30990	.	.	.	.	.	.	.	Blast: ABC transporter C family member 3 [Capsella rubella] (83% identity)	.	.	scaffold_2	version-2	gene	14891953	14898932	0.01	-	.		.	.	.	.	.	.	.	.	.	.	.	.	.	KK_halleri	MZ_halleri	KK_higheffectSNP	MZ_higheffectSNP	scaffold_2	14895881	splice_donor_variant&intron_variant	0.1	0.642857	.	.	.	.	.	.	.	.
AL2G31400	AT1G71820	843512	OG0006100	SEC6	protein_coding	SEC6	.	SEC6%3B FUNCTIONS IN: molecular_function unknown%3B INVOLVED IN: pollen germination%2C pollen tube growth%3B LOCATED IN: cytosol%2C plasma membrane%2C exocyst%3B EXPRESSED IN: 24 plant structures%3B EXPRESSED DURING: 15 growth stages%3B CONTAINS InterPro DOMAIN/s: Exocyst complex component Sec6 (InterPro:IPR010326)%3B Has 534 Blast hits to 527 proteins in 171 species: Archae - 3%3B Bacteria - 6%3…	Encodes a member of the exocyst complex gene family. The exocyst is a protein complex involved in tethering vesicles to the plasma membrane during regulated or polarized secretion.	SEC6%3B FUNCTIONS IN: molecular_function unknown%3B INVOLVED IN: pollen germination%2C pollen tube growth%3B LOCATED IN: cytosol%2C plasma membrane%2C exocyst%3B EXPRESSED IN: 24 plant structures%3B EXPRESSED DURING: 15 growth stages%3B CONTAINS InterPro DOMAIN/s: Exocyst complex component Sec6 (InterPro:IPR010326)%3B Has 534 Blast hits to 527 proteins in 171 species: Archae - 3%3B Bacteria - 6%3…	scaffold_2	version-2	gene	15048581	15055962	0.24	+	.		.	.	.	.	.	.	.	.	.	.	.	.	.	KK_halleri	MZ_halleri	NIELSEN	DD	.	.	.	.	.	.	.	.	.	.	.	.	.
AL2G33170	.	.	.	.	.	.	.	Blast: PREDICTED: B3 domain-containing protein REM21-like [Camelina sativa] (83% identity)	.	.	scaffold_2	version-2	gene	15800105	15802742	0.09	-	.		.	.	.	.	.	.	.	.	.	.	.	.	.	KK_halleri	MZ_halleri	KK_higheffectSNP	MZ_INDEL	scaffold_2	15802437	stop_gained	0	0.5	.	.	.	.	.	.	.	.
AL2G38820	.	.	OG0020168	.	.	.	.	Blast: PREDICTED: ubiquitin carboxyl-terminal hydrolase 15-like [Tarenaya hassleriana] (68% identity)	.	.	scaffold_2	version-2	gene	18199081	18201965	0.17	+	.		.	.	.	.	.	.	.	.	.	.	.	.	.	KK_halleri	MZ_halleri	KK_INDEL	MZ_INDEL	.	.	.	.	.	scaffold_2	18200493	0	0.571429	stop_gained&disruptive_inframe_insertion	scaffold_2	18200479	frameshift_variant
AL3G24000	AT3G12350	820413	OG0007267	.	protein_coding	F-box family protein	.	F-box family protein%3B CONTAINS InterPro DOMAIN/s: F-box domain%2C cyclin-like (InterPro:IPR001810)%2C F-box domain%2C Skp2-like (InterPro:IPR022364)%3B Has 51 Blast hits to 51 proteins in 14 species: Archae - 0%3B Bacteria - 0%3B Metazoa - 1%3B Fungi - 3%3B Plants - 45%3B Viruses - 0%3B Other Eukaryotes - 2 (source: NCBI BLink).	.	F-box family protein%3B CONTAINS InterPro DOMAIN/s: F-box domain%2C cyclin-like (InterPro:IPR001810)%2C F-box domain%2C Skp2-like (InterPro:IPR022364)%3B Has 51 Blast hits to 51 proteins in 14 species: Archae - 0%3B Bacteria - 0%3B Metazoa - 1%3B Fungi - 3%3B Plants - 45%3B Viruses - 0%3B Other Eukaryotes - 2 (source: NCBI BLink).	scaffold_3	version-2	gene	4967904	4969688	0.31	+	.		.	.	.	.	.	.	.	.	.	.	.	.	.	KK_halleri	MZ_halleri	KK_INDEL	MZ_INDEL	.	.	.	.	.	scaffold_3	4969430	1	0.357143	frameshift_variant	scaffold_3	4969431	frameshift_variant
AL4G30850	AT2G34830	818048	OG0005773	WRKY35	protein_coding	WRKY D-binding protein 35	WRKY D-binding protein 35	WRKY D-binding protein 35 (WRKY35)%3B CONTAINS InterPro DOMAIN/s: D-binding WRKY (InterPro:IPR003657)%2C Transcription factor%2C WRKY group Iie (InterPro:IPR017412)%3B BEST Arabidopsis thaliana protein match is: WRKY D-binding protein 14 (TAIR:AT1G30650.1)%3B Has 5047 Blast hits to 3028 proteins in 237 species: Archae - 0%3B Bacteria - 12%3B Metazoa - 64%3B Fungi - 63%3B Plants - 3289%3B Viruses …	member of WRKY Transcription Factor%3B Group II-e	WRKY DNA-binding protein 35 (WRKY35)%3B CONTAINS InterPro DOMAIN/s: DNA-binding WRKY (InterPro:IPR003657)%2C Transcription factor%2C WRKY group Iie (InterPro:IPR017412)%3B BEST Arabidopsis thaliana protein match is: WRKY DNA-binding protein 14 (TAIR:AT1G30650.1)%3B Has 5047 Blast hits to 3028 proteins in 237 species: Archae - 0%3B Bacteria - 12%3B Metazoa - 64%3B Fungi - 63%3B Plants - 3289%3B Vi…	scaffold_4	version-2	gene	16563648	16566325	0.26	-	.		.	.	.	.	.	.	.	.	.	.	.	.	.	KK_halleri	MZ_halleri	KK_higheffectSNP	MZ_higheffectSNP	scaffold_4	16565719	splice_donor_variant&intron_variant	0	0.714286	.	.	.	.	.	.	.	.
AL4G35920	.	.	.	.	.	.	.	Blast: PREDICTED: WD repeat-containing protein 44 [Raphanus sativus] (63% identity)	.	.	scaffold_4	version-2	gene	18749617	18750028	0.37	-	.		.	.	.	.	.	.	.	.	.	.	.	.	.	KK_halleri	MZ_halleri	KK_INDEL	MZ_INDEL	.	.	.	.	.	scaffold_4	18749957	0	0.428571	frameshift_variant	scaffold_4	18749958	frameshift_variant
AL4G42470	AT2G43650	818967	OG0014078	EMB2777	protein_coding	Sas10/U3 ribonucleoprotein (Utp) family protein	EMBRYO DEFECTIVE 2777	EMBRYO DEFECTIVE 2777 (EMB2777)%3B FUNCTIONS IN: molecular_function unknown%3B INVOLVED IN: gene silencing%3B LOCATED IN: nucleus%3B EXPRESSED IN: 22 plant structures%3B EXPRESSED DURING: 12 growth stages%3B CONTAINS InterPro DOMAIN/s: Sas10/Utp3/C1D (InterPro:IPR007146)%2C Something about silencing protein 10 (Sas10)%2C C-terminal (InterPro:IPR018972)%3B BEST Arabidopsis thaliana protein match i…	.	EMBRYO DEFECTIVE 2777 (EMB2777)%3B FUNCTIONS IN: molecular_function unknown%3B INVOLVED IN: gene silencing%3B LOCATED IN: nucleus%3B EXPRESSED IN: 22 plant structures%3B EXPRESSED DURING: 12 growth stages%3B CONTAINS InterPro DOMAIN/s: Sas10/Utp3/C1D (InterPro:IPR007146)%2C Something about silencing protein 10 (Sas10)%2C C-terminal (InterPro:IPR018972)%3B BEST Arabidopsis thaliana protein match i…	scaffold_4	version-2	gene	21328284	21332474	0.36	+	.		.	.	.	.	.	.	.	.	.	.	.	.	.	KK_halleri	MZ_halleri	KK_higheffectSNP	FLK	scaffold_4	21328977	stop_gained	0.05	0.857143	.	.	.	.	.	.	.	.
AL5G26180	AT3G46960	823849	OG0011279	.	.	R helicase%2C ATP-dependent%2C SK12/DOB1 protein	.	.	The gene encodes a DExD%26		scaffold_5	version-2	gene	12989067	12996367	1.2	-	.	K+ deprivation stress response, K+ transport [Xu et al., 2011]	.	.	.	.	.	.	.	.	.	.	.	.	.	KK_halleri	MZ_halleri	KK_higheffectSNP	NIELSEN	scaffold_5	12991264	stop_gained	1	0.428571	.	.	.	.	.	.	.	.
AL5G35760	AT3G54680	824633	OG0002927	.	protein_coding	proteophosphoglycan-like protein	.	proteophosphoglycan-related%3B FUNCTIONS IN: molecular_function unknown%3B INVOLVED IN: biological_process unknown%3B LOCATED IN: chloroplast%3B EXPRESSED IN: 16 plant structures%3B EXPRESSED DURING: 7 growth stages%3B Has 4120 Blast hits to 443 proteins in 120 species: Archae - 2%3B Bacteria - 57%3B Metazoa - 120%3B Fungi - 93%3B Plants - 84%3B Viruses - 11%3B Other Eukaryotes - 3753 (source: NC…	.	proteophosphoglycan-related%3B FUNCTIONS IN: molecular_function unknown%3B INVOLVED IN: biological_process unknown%3B LOCATED IN: chloroplast%3B EXPRESSED IN: 16 plant structures%3B EXPRESSED DURING: 7 growth stages%3B Has 4120 Blast hits to 443 proteins in 120 species: Archae - 2%3B Bacteria - 57%3B Metazoa - 120%3B Fungi - 93%3B Plants - 84%3B Viruses - 11%3B Other Eukaryotes - 3753 (source: NC…	scaffold_5	version-2	gene	17115745	17117368	0.6	+	.		.	.	.	.	.	.	.	.	.	.	.	.	.	KK_halleri	MZ_halleri	KK_INDEL	MZ_INDEL	.	.	.	.	.	scaffold_5	17116691	0.1	0.571429	frameshift_variant	scaffold_5	17116689	frameshift_variant
AL5G37630	AT3G56300	824797	OG0015667	.	protein_coding	Cysteinyl-tR synthetase%2C class Ia family protein	.	Cysteinyl-tR synthetase%2C class Ia family protein%3B FUNCTIONS IN: cysteine-tR ligase activity%2C nucleotide binding%2C ATP binding%3B INVOLVED IN: cysteinyl-tR aminoacylation%2C translation%3B LOCATED IN: cytoplasm%3B EXPRESSED IN: 11 plant structures%3B EXPRESSED DURING: 6 growth stages%3B CONTAINS InterPro DOMAIN/s: Rossmann-like alpha/beta/alpha sandwich fold (InterPro:IPR014729)%2C Cysteiny…	.	Cysteinyl-tRNA synthetase%2C class Ia family protein%3B FUNCTIONS IN: cysteine-tRNA ligase activity%2C nucleotide binding%2C ATP binding%3B INVOLVED IN: cysteinyl-tRNA aminoacylation%2C translation%3B LOCATED IN: cytoplasm%3B EXPRESSED IN: 11 plant structures%3B EXPRESSED DURING: 6 growth stages%3B CONTAINS InterPro DOMAIN/s: Rossmann-like alpha/beta/alpha sandwich fold (InterPro:IPR014729)%2C Cy…	scaffold_5	version-2	gene	17885733	17888266	0.28	+	.		.	.	.	.	.	.	.	.	.	.	.	.	.	KK_halleri	MZ_halleri	KK_INDEL	MZ_higheffectSNP	.	.	.	.	.	scaffold_5	17888078	0	0.428571	frameshift_variant	scaffold_5	17888076	frameshift_variant
AL5G40920	AT3G59040	825073	OG0016506	.	protein_coding	Tetratricopeptide repeat (TPR)-like superfamily protein	.	Tetratricopeptide repeat (TPR)-like superfamily protein%3B FUNCTIONS IN: molecular_function unknown%3B INVOLVED IN: biological_process unknown%3B LOCATED IN: chloroplast%3B EXPRESSED IN: 22 plant structures%3B EXPRESSED DURING: 13 growth stages%3B CONTAINS InterPro DOMAIN/s: Pentatricopeptide repeat (InterPro:IPR002885)%3B BEST Arabidopsis thaliana protein match is: Pentatricopeptide repeat (PPR)…	.	Tetratricopeptide repeat (TPR)-like superfamily protein%3B FUNCTIONS IN: molecular_function unknown%3B INVOLVED IN: biological_process unknown%3B LOCATED IN: chloroplast%3B EXPRESSED IN: 22 plant structures%3B EXPRESSED DURING: 13 growth stages%3B CONTAINS InterPro DOMAIN/s: Pentatricopeptide repeat (InterPro:IPR002885)%3B BEST Arabidopsis thaliana protein match is: Pentatricopeptide repeat (PPR)…	scaffold_5	version-2	gene	19168337	19171245	0.76	-	.		.	.	.	.	.	.	.	.	.	.	.	.	.	KK_halleri	MZ_halleri	FST	DD	.	.	.	.	.	.	.	.	.	.	.	.	.
AL5G40930	AT2G43020	825074	OG0001564	PAO2	protein_coding	polyamine oxidase 2	polyamine oxidase 2	polyamine oxidase 2 (PAO2)%3B FUNCTIONS IN: primary amine oxidase activity%2C oxidoreductase activity%3B INVOLVED IN: oxidation reduction%3B LOCATED IN: cellular_component unknown%3B EXPRESSED IN: sperm cell%2C male gametophyte%2C pollen tube%3B EXPRESSED DURING: L mature pollen stage%2C M germinated pollen stage%3B CONTAINS InterPro DOMAIN/s: Amine oxidase (InterPro:IPR002937)%2C Flavin-containi…	Encodes a polyamine oxidase.	polyamine oxidase 3 (PAO3)%3B CONTAINS InterPro DOMAIN/s: Amine oxidase (InterPro:IPR002937)%2C Flavin-containing amine oxidase (InterPro:IPR001613)%3B BEST Arabidopsis thaliana protein match is: polyamine oxidase 2 (TAIR:AT2G43020.1)%3B Has 6641 Blast hits to 6191 proteins in 1102 species: Archae - 131%3B Bacteria - 2618%3B Metazoa - 1408%3B Fungi - 589%3B Plants - 766%3B Viruses - 0%3B Other Eu…	scaffold_5	version-2	gene	19171702	19174805	0.24	-	.		.	.	.	.	.	.	.	.	.	.	.	.	.	KK_halleri	MZ_halleri	FST	DD	.	.	.	.	.	.	.	.	.	.	.	.	.
AL6G19740	AT5G09350	830794	OG0014587	PI-4KBETA2	protein_coding	phosphatidylinositol 4-OH kinase beta2	phosphatidylinositol 4-OH kinase beta2	phosphatidylinositol 4-OH kinase beta2 (PI-4KBETA2)%3B FUNCTIONS IN: inositol or phosphatidylinositol kinase activity%2C binding%2C phosphotransferase activity%2C alcohol group as acceptor%3B INVOLVED IN: phosphoinositide biosynthetic process%2C root hair cell tip growth%2C pollen tube growth%3B CONTAINS InterPro DOMAIN/s: Phosphatidylinositol 3-/4-kinase%2C catalytic (InterPro:IPR000403)%2C Phos…	Encodes a phosphatidylinositol 4-OH kinase%2C PI-4Kbeta2. Arabidopsis contains 12 PI-4Ks in three separate families: PI-4Kalphs%2C PI-4kbeta%2C and PI-4Kgamma. PI-4Kbeta2 is 83%25 identical to PI-4kbeta1 encoded by At5g64070. Important for polarized root hair growth as the loss of this gene and its close relative PI-4kbeta1%2C leads to the formation of abnormal root hairs.	phosphatidylinositol 4-OH kinase beta2 (PI-4KBETA2)%3B FUNCTIONS IN: inositol or phosphatidylinositol kinase activity%2C binding%2C phosphotransferase activity%2C alcohol group as acceptor%3B INVOLVED IN: phosphoinositide biosynthetic process%2C root hair cell tip growth%2C pollen tube growth%3B CONTAINS InterPro DOMAIN/s: Phosphatidylinositol 3-/4-kinase%2C catalytic (InterPro:IPR000403)%2C Phos…	scaffold_6	version-2	gene	3709256	3716422	0.24	-	.		.	.	.	.	.	.	.	.	.	.	.	.	.	KK_halleri	MZ_halleri	KK_higheffectSNP	MZ_higheffectSNP	scaffold_6	3714769	stop_gained	1	0.0714286	.	.	.	.	.	.	.	.
AL6G50290	AT4G02720	828193	OG0008965	.	protein_coding	Ras-induced vulval development antagonist protein	.	unknown protein%3B FUNCTIONS IN: molecular_function unknown%3B INVOLVED IN: biological_process unknown%3B EXPRESSED IN: 25 plant structures%3B EXPRESSED DURING: 14 growth stages%3B CONTAINS InterPro DOMAIN/s: Protein of unknown function DUF926 (InterPro:IPR009269)%3B Has 30201 Blast hits to 17322 proteins in 780 species: Archae - 12%3B Bacteria - 1396%3B Metazoa - 17338%3B Fungi - 3422%3B Plants …	.	unknown protein%3B FUNCTIONS IN: molecular_function unknown%3B INVOLVED IN: biological_process unknown%3B EXPRESSED IN: 25 plant structures%3B EXPRESSED DURING: 14 growth stages%3B CONTAINS InterPro DOMAIN/s: Protein of unknown function DUF926 (InterPro:IPR009269)%3B Has 30201 Blast hits to 17322 proteins in 780 species: Archae - 12%3B Bacteria - 1396%3B Metazoa - 17338%3B Fungi - 3422%3B Plants …	scaffold_6	version-2	gene	23515941	23518001	0.46	+	.		.	.	.	.	.	.	.	.	.	.	.	.	.	KK_halleri	MZ_halleri	KK_INDEL	FLK	.	.	.	.	.	scaffold_6	23516712	1	0.142857	frameshift_variant	scaffold_6	23516714	frameshift_variant
AL7G30090	AT4G23380	828437	OG0012076	.	protein_coding	NEP-interacting protein%2C putative (DUF239)	.	Protein of Unknown Function (DUF239)%3B INVOLVED IN: biological_process unknown%3B LOCATED IN: endomembrane system%3B CONTAINS InterPro DOMAIN/s: Protein of unknown function DUF239%2C plant (InterPro:IPR004314)%3B BEST Arabidopsis thaliana protein match is: Protein of Unknown Function (DUF239) (TAIR:AT4G23350.1)%3B Has 707 Blast hits to 664 proteins in 27 species: Archae - 0%3B Bacteria - 13%3B M…	.	Protein of Unknown Function (DUF239)%3B INVOLVED IN: biological_process unknown%3B LOCATED IN: endomembrane system%3B CONTAINS InterPro DOMAIN/s: Protein of unknown function DUF239%2C plant (InterPro:IPR004314)%3B BEST Arabidopsis thaliana protein match is: Protein of Unknown Function (DUF239) (TAIR:AT4G23350.1)%3B Has 707 Blast hits to 664 proteins in 27 species: Archae - 0%3B Bacteria - 13%3B M…	scaffold_7	version-2	gene	8115703	8117510	.	+	.		.	.	.	.	.	.	.	.	.	.	.	.	.	KK_halleri	MZ_halleri	KK_higheffectSNP	MZ_higheffectSNP	scaffold_7	8115986	splice_acceptor_variant&intron_variant	0	0.5	.	.	.	.	.	.	.	.
AL7G43870	.	.	.	.	.	.	.	Blast: PREDICTED: uncharacterized protein LOC104750585 [Camelina sativa] (52% identity)	.	.	scaffold_7	version-2	gene	17934059	17938162	0.05	-	.		.	.	.	.	.	.	.	.	.	.	.	.	.	KK_halleri	MZ_halleri	KK_INDEL	MZ_higheffectSNP	.	.	.	.	.	scaffold_7	17934288	0	0.5	splice_donor_variant&intron_variant	scaffold_7	17934289	splice_donor_variant&intron_variant
AL7G44950	.	.	.	.	.	.	.	Blast: PREDICTED: uncharacterized protein LOC104748579 [Camelina sativa] (67% identity)	.	.	scaffold_7	version-2	gene	19118574	19126219	0.01	+	.		.	.	.	.	.	.	.	.	.	.	.	.	.	KK_halleri	MZ_halleri	KK_INDEL	MZ_higheffectSNP	.	.	.	.	.	scaffold_7	19121251	0	0.428571	frameshift_variant	scaffold_7	19121252	frameshift_variant
AL7G50230	AT5G39900	833987	OG0019417	.	protein_coding	Small GTP-binding protein	.	Small GTP-binding protein%3B FUNCTIONS IN: GTP binding%2C translation elongation factor activity%2C GTPase activity%3B INVOLVED IN: biological_process unknown%3B LOCATED IN: cellular_component unknown%3B EXPRESSED IN: 21 plant structures%3B EXPRESSED DURING: 13 growth stages%3B CONTAINS InterPro DOMAIN/s: GTP-binding protein LepA (InterPro:IPR006297)%2C Protein synthesis factor%2C GTP-binding (In…	.	Small GTP-binding protein%3B FUNCTIONS IN: GTP binding%2C translation elongation factor activity%2C GTPase activity%3B INVOLVED IN: biological_process unknown%3B LOCATED IN: cellular_component unknown%3B EXPRESSED IN: 21 plant structures%3B EXPRESSED DURING: 13 growth stages%3B CONTAINS InterPro DOMAIN/s: GTP-binding protein LepA (InterPro:IPR006297)%2C Protein synthesis factor%2C GTP-binding (In…	scaffold_7	version-2	gene	22802467	22804927	.	+	.		.	.	.	.	.	.	.	.	.	.	.	.	.	KK_halleri	MZ_halleri	KK_higheffectSNP	MZ_higheffectSNP	scaffold_7	22803712	stop_gained	1	0.428571	.	.	.	.	.	.	.	.
AL8G19990	.	.	.	.	.	.	.	Blast: PREDICTED: protein MOR1 isoform X1 [Brassica oleracea var. oleracea] (34% identity)	.	.	scaffold_8	version-2	gene	10112416	10114866	0.28	+	.		.	.	.	.	.	.	.	.	.	.	.	.	.	KK_halleri	MZ_halleri	KK_INDEL	MZ_INDEL	scaffold_8	10114340	stop_gained	0.95	0.0714286	scaffold_8	10112914	0.95	0.214286	splice_acceptor_variant&intron_variant	scaffold_8	10112915	splice_acceptor_variant&intron_variant
AL8G20240	AT5G47970	834848	OG0018851	.	protein_coding	Aldolase-type TIM barrel family protein	.	Aldolase-type TIM barrel family protein%3B FUNCTIONS IN: tR dihydrouridine synthase activity%2C FAD binding%2C catalytic activity%3B INVOLVED IN: regulation of nitrogen utilization%2C tR processing%2C oxidation reduction%2C metabolic process%3B LOCATED IN: nucleus%2C cytoplasm%2C phragmoplast%3B EXPRESSED IN: 21 plant structures%3B EXPRESSED DURING: 13 growth stages%3B CONTAINS InterPro DOMAIN/s:…	.	Aldolase-type TIM barrel family protein%3B FUNCTIONS IN: tRNA dihydrouridine synthase activity%2C FAD binding%2C catalytic activity%3B INVOLVED IN: regulation of nitrogen utilization%2C tRNA processing%2C oxidation reduction%2C metabolic process%3B LOCATED IN: nucleus%2C cytoplasm%2C phragmoplast%3B EXPRESSED IN: 21 plant structures%3B EXPRESSED DURING: 13 growth stages%3B CONTAINS InterPro DOMAI…	scaffold_8	version-2	gene	10497424	10500478	0.37	-	.		.	.	.	.	.	.	.	.	.	.	.	.	.	KK_halleri	MZ_halleri	FLK	DD	scaffold_8	10498593	splice_donor_variant&intron_variant	1	0	.	.	.	.	.	.	.	.
AL8G20280	AT5G48020	834853	OG0018849	.	protein_coding	2-oxoglutarate (2OG) and Fe(II)-dependent oxygenase superfamily protein	.	2-oxoglutarate (2OG) and Fe(II)-dependent oxygenase superfamily protein%3B Has 30201 Blast hits to 17322 proteins in 780 species: Archae - 12%3B Bacteria - 1396%3B Metazoa - 17338%3B Fungi - 3422%3B Plants - 5037%3B Viruses - 0%3B Other Eukaryotes - 2996 (source: NCBI BLink).	.	2-oxoglutarate (2OG) and Fe(II)-dependent oxygenase superfamily protein%3B Has 30201 Blast hits to 17322 proteins in 780 species: Archae - 12%3B Bacteria - 1396%3B Metazoa - 17338%3B Fungi - 3422%3B Plants - 5037%3B Viruses - 0%3B Other Eukaryotes - 2996 (source: NCBI BLink).	scaffold_8	version-2	gene	10552904	10555088	0.44	-	.	3-fold expression change in genotoxic stress [Chen et al., 2003],expression change upon ionizing radiation [Culligan et al., 2006]	.	.	.	.	.	.	.	.	.	.	.	.	.	KK_halleri	MZ_halleri	KK_higheffectSNP	MZ_higheffectSNP	scaffold_8	10554406	stop_gained	0.05	0.714286	.	.	.	.	.	.	.	.
AL8G32870	.	.	OG0021089	.	.	.	.	Blast: ervatamin-B [Eutrema salsugineum] (56% identity)	.	.	scaffold_8	version-2	gene	17839925	17842476	0.24	+	.		.	.	.	.	.	.	.	.	.	.	.	.	.	KK_halleri	MZ_halleri	KK_INDEL	DD	.	.	.	.	.	scaffold_8	17840799	0	0.857143	frameshift_variant&splice_region_variant	scaffold_8	17840800	frameshift_variant&splice_region_variant
AL2G12590	AT1G63010	842604	OG0014421	.	protein_coding	Major Facilitator Superfamily with SPX (SYG1/Pho81/XPR1) domain-containing protein	.	computational_Major Facilitator Superfamily with SPX (SYG1/Pho81/XPR1) domain-containing protein%3B INVOLVED IN: transmembrane transport%3B LOCATED IN: vacuolar membrane%2C plant-type vacuole%3B EXPRESSED IN: 25 plant structures%3B EXPRESSED DURING: 13 growth stages%3B CONTAINS InterPro DOMAIN/s: SPX%2C N-terminal (InterPro:IPR004331)%2C Major facilitator superfamily MFS-1 (InterPro:IPR011701)%2C…	.	Major Facilitator Superfamily with SPX (SYG1/Pho81/XPR1) domain-containing protein%3B INVOLVED IN: transmembrane transport%3B LOCATED IN: vacuolar membrane%2C plant-type vacuole%3B EXPRESSED IN: 25 plant structures%3B EXPRESSED DURING: 13 growth stages%3B CONTAINS InterPro DOMAIN/s: SPX%2C N-terminal (InterPro:IPR004331)%2C Major facilitator superfamily MFS-1 (InterPro:IPR011701)%2C Major facilit…	scaffold_2	version-2	gene	1289828	1294721	0.24	+	.	vacuolar phsophate transporter (VPT1) for Pi sequestration, mutant shows tolerance to As [Luan et. al. 2018]	.	.	.	.	.	.	.	.	.	.	.	.	.	KK_arenosa	MZ_arenosa	FST	FST	.	.	.	.	.	.	.	.	.	.	.	.	.
AL2G12590	AT1G63010	842604	OG0014421	.	protein_coding	Major Facilitator Superfamily with SPX (SYG1/Pho81/XPR1) domain-containing protein	.	computational_Major Facilitator Superfamily with SPX (SYG1/Pho81/XPR1) domain-containing protein%3B INVOLVED IN: transmembrane transport%3B LOCATED IN: vacuolar membrane%2C plant-type vacuole%3B EXPRESSED IN: 25 plant structures%3B EXPRESSED DURING: 13 growth stages%3B CONTAINS InterPro DOMAIN/s: SPX%2C N-terminal (InterPro:IPR004331)%2C Major facilitator superfamily MFS-1 (InterPro:IPR011701)%2C…	.	Major Facilitator Superfamily with SPX (SYG1/Pho81/XPR1) domain-containing protein%3B INVOLVED IN: transmembrane transport%3B LOCATED IN: vacuolar membrane%2C plant-type vacuole%3B EXPRESSED IN: 25 plant structures%3B EXPRESSED DURING: 13 growth stages%3B CONTAINS InterPro DOMAIN/s: SPX%2C N-terminal (InterPro:IPR004331)%2C Major facilitator superfamily MFS-1 (InterPro:IPR011701)%2C Major facilit…	scaffold_2	version-2	gene	1289828	1294721	0.24	+	.	vacuolar phsophate transporter (VPT1) for Pi sequestration, mutant shows tolerance to As [Luan et. al. 2018]	.	.	.	.	.	.	.	.	.	.	.	.	.	KK_arenosa	MZ_arenosa	DXY	AFDabs	.	.	.	.	.	.	.	.	.	.	.	.	.
AL2G12590	AT1G63010	842604	OG0014421	.	protein_coding	Major Facilitator Superfamily with SPX (SYG1/Pho81/XPR1) domain-containing protein	.	computational_Major Facilitator Superfamily with SPX (SYG1/Pho81/XPR1) domain-containing protein%3B INVOLVED IN: transmembrane transport%3B LOCATED IN: vacuolar membrane%2C plant-type vacuole%3B EXPRESSED IN: 25 plant structures%3B EXPRESSED DURING: 13 growth stages%3B CONTAINS InterPro DOMAIN/s: SPX%2C N-terminal (InterPro:IPR004331)%2C Major facilitator superfamily MFS-1 (InterPro:IPR011701)%2C…	.	Major Facilitator Superfamily with SPX (SYG1/Pho81/XPR1) domain-containing protein%3B INVOLVED IN: transmembrane transport%3B LOCATED IN: vacuolar membrane%2C plant-type vacuole%3B EXPRESSED IN: 25 plant structures%3B EXPRESSED DURING: 13 growth stages%3B CONTAINS InterPro DOMAIN/s: SPX%2C N-terminal (InterPro:IPR004331)%2C Major facilitator superfamily MFS-1 (InterPro:IPR011701)%2C Major facilit…	scaffold_2	version-2	gene	1289828	1294721	0.24	+	.	vacuolar phsophate transporter (VPT1) for Pi sequestration, mutant shows tolerance to As [Luan et. al. 2018]	.	.	.	.	.	.	.	.	.	.	.	.	.	KK_arenosa	MZ_arenosa	NIELSEN	AFDabs	.	.	.	.	.	.	.	.	.	.	.	.	.
AL2G12590	AT1G63010	842604	OG0014421	.	protein_coding	Major Facilitator Superfamily with SPX (SYG1/Pho81/XPR1) domain-containing protein	.	computational_Major Facilitator Superfamily with SPX (SYG1/Pho81/XPR1) domain-containing protein%3B INVOLVED IN: transmembrane transport%3B LOCATED IN: vacuolar membrane%2C plant-type vacuole%3B EXPRESSED IN: 25 plant structures%3B EXPRESSED DURING: 13 growth stages%3B CONTAINS InterPro DOMAIN/s: SPX%2C N-terminal (InterPro:IPR004331)%2C Major facilitator superfamily MFS-1 (InterPro:IPR011701)%2C…	.	Major Facilitator Superfamily with SPX (SYG1/Pho81/XPR1) domain-containing protein%3B INVOLVED IN: transmembrane transport%3B LOCATED IN: vacuolar membrane%2C plant-type vacuole%3B EXPRESSED IN: 25 plant structures%3B EXPRESSED DURING: 13 growth stages%3B CONTAINS InterPro DOMAIN/s: SPX%2C N-terminal (InterPro:IPR004331)%2C Major facilitator superfamily MFS-1 (InterPro:IPR011701)%2C Major facilit…	scaffold_2	version-2	gene	1289828	1294721	0.24	+	.	vacuolar phsophate transporter (VPT1) for Pi sequestration, mutant shows tolerance to As [Luan et. al. 2018]	.	.	.	.	.	.	.	.	.	.	.	.	.	KK_arenosa	MZ_arenosa	DXY	FST	.	.	.	.	.	.	.	.	.	.	.	.	.
AL2G12590	AT1G63010	842604	OG0014421	.	protein_coding	Major Facilitator Superfamily with SPX (SYG1/Pho81/XPR1) domain-containing protein	.	computational_Major Facilitator Superfamily with SPX (SYG1/Pho81/XPR1) domain-containing protein%3B INVOLVED IN: transmembrane transport%3B LOCATED IN: vacuolar membrane%2C plant-type vacuole%3B EXPRESSED IN: 25 plant structures%3B EXPRESSED DURING: 13 growth stages%3B CONTAINS InterPro DOMAIN/s: SPX%2C N-terminal (InterPro:IPR004331)%2C Major facilitator superfamily MFS-1 (InterPro:IPR011701)%2C…	.	Major Facilitator Superfamily with SPX (SYG1/Pho81/XPR1) domain-containing protein%3B INVOLVED IN: transmembrane transport%3B LOCATED IN: vacuolar membrane%2C plant-type vacuole%3B EXPRESSED IN: 25 plant structures%3B EXPRESSED DURING: 13 growth stages%3B CONTAINS InterPro DOMAIN/s: SPX%2C N-terminal (InterPro:IPR004331)%2C Major facilitator superfamily MFS-1 (InterPro:IPR011701)%2C Major facilit…	scaffold_2	version-2	gene	1289828	1294721	0.24	+	.	vacuolar phsophate transporter (VPT1) for Pi sequestration, mutant shows tolerance to As [Luan et. al. 2018]	.	.	.	.	.	.	.	.	.	.	.	.	.	KK_arenosa	MZ_arenosa	FST	AFDabs	.	.	.	.	.	.	.	.	.	.	.	.	.
AL2G12590	AT1G63010	842604	OG0014421	.	protein_coding	Major Facilitator Superfamily with SPX (SYG1/Pho81/XPR1) domain-containing protein	.	computational_Major Facilitator Superfamily with SPX (SYG1/Pho81/XPR1) domain-containing protein%3B INVOLVED IN: transmembrane transport%3B LOCATED IN: vacuolar membrane%2C plant-type vacuole%3B EXPRESSED IN: 25 plant structures%3B EXPRESSED DURING: 13 growth stages%3B CONTAINS InterPro DOMAIN/s: SPX%2C N-terminal (InterPro:IPR004331)%2C Major facilitator superfamily MFS-1 (InterPro:IPR011701)%2C…	.	Major Facilitator Superfamily with SPX (SYG1/Pho81/XPR1) domain-containing protein%3B INVOLVED IN: transmembrane transport%3B LOCATED IN: vacuolar membrane%2C plant-type vacuole%3B EXPRESSED IN: 25 plant structures%3B EXPRESSED DURING: 13 growth stages%3B CONTAINS InterPro DOMAIN/s: SPX%2C N-terminal (InterPro:IPR004331)%2C Major facilitator superfamily MFS-1 (InterPro:IPR011701)%2C Major facilit…	scaffold_2	version-2	gene	1289828	1294721	0.24	+	.	vacuolar phsophate transporter (VPT1) for Pi sequestration, mutant shows tolerance to As [Luan et. al. 2018]	.	.	.	.	.	.	.	.	.	.	.	.	.	KK_arenosa	MZ_arenosa	NIELSEN	FST	.	.	.	.	.	.	.	.	.	.	.	.	.
AL2G12590	AT1G63010	842604	OG0014421	.	protein_coding	Major Facilitator Superfamily with SPX (SYG1/Pho81/XPR1) domain-containing protein	.	computational_Major Facilitator Superfamily with SPX (SYG1/Pho81/XPR1) domain-containing protein%3B INVOLVED IN: transmembrane transport%3B LOCATED IN: vacuolar membrane%2C plant-type vacuole%3B EXPRESSED IN: 25 plant structures%3B EXPRESSED DURING: 13 growth stages%3B CONTAINS InterPro DOMAIN/s: SPX%2C N-terminal (InterPro:IPR004331)%2C Major facilitator superfamily MFS-1 (InterPro:IPR011701)%2C…	.	Major Facilitator Superfamily with SPX (SYG1/Pho81/XPR1) domain-containing protein%3B INVOLVED IN: transmembrane transport%3B LOCATED IN: vacuolar membrane%2C plant-type vacuole%3B EXPRESSED IN: 25 plant structures%3B EXPRESSED DURING: 13 growth stages%3B CONTAINS InterPro DOMAIN/s: SPX%2C N-terminal (InterPro:IPR004331)%2C Major facilitator superfamily MFS-1 (InterPro:IPR011701)%2C Major facilit…	scaffold_2	version-2	gene	1289828	1294721	0.24	+	.	vacuolar phsophate transporter (VPT1) for Pi sequestration, mutant shows tolerance to As [Luan et. al. 2018]	.	.	.	.	.	.	.	.	.	.	.	.	.	KK_arenosa	MZ_arenosa	AFDabs	AFDabs	.	.	.	.	.	.	.	.	.	.	.	.	.
AL2G12590	AT1G63010	842604	OG0014421	.	protein_coding	Major Facilitator Superfamily with SPX (SYG1/Pho81/XPR1) domain-containing protein	.	computational_Major Facilitator Superfamily with SPX (SYG1/Pho81/XPR1) domain-containing protein%3B INVOLVED IN: transmembrane transport%3B LOCATED IN: vacuolar membrane%2C plant-type vacuole%3B EXPRESSED IN: 25 plant structures%3B EXPRESSED DURING: 13 growth stages%3B CONTAINS InterPro DOMAIN/s: SPX%2C N-terminal (InterPro:IPR004331)%2C Major facilitator superfamily MFS-1 (InterPro:IPR011701)%2C…	.	Major Facilitator Superfamily with SPX (SYG1/Pho81/XPR1) domain-containing protein%3B INVOLVED IN: transmembrane transport%3B LOCATED IN: vacuolar membrane%2C plant-type vacuole%3B EXPRESSED IN: 25 plant structures%3B EXPRESSED DURING: 13 growth stages%3B CONTAINS InterPro DOMAIN/s: SPX%2C N-terminal (InterPro:IPR004331)%2C Major facilitator superfamily MFS-1 (InterPro:IPR011701)%2C Major facilit…	scaffold_2	version-2	gene	1289828	1294721	0.24	+	.	vacuolar phsophate transporter (VPT1) for Pi sequestration, mutant shows tolerance to As [Luan et. al. 2018]	.	.	.	.	.	.	.	.	.	.	.	.	.	KK_arenosa	MZ_arenosa	AFDabs	FST	.	.	.	.	.	.	.	.	.	.	.	.	.
AL2G30820	AT1G71210	843461	.	.	protein_coding	Pentatricopeptide repeat (PPR) superfamily protein	.	computational_Pentatricopeptide repeat (PPR) superfamily protein%3B CONTAINS InterPro DOMAIN/s: Pentatricopeptide repeat (InterPro:IPR002885)%3B BEST Arabidopsis thaliana protein match is: Tetratricopeptide repeat (TPR)-like superfamily protein (TAIR:AT3G06920.1)%3B Has 23089 Blast hits to 6463 proteins in 161 species: Archae - 1%3B Bacteria - 0%3B Metazoa - 25%3B Fungi - 48%3B Plants - 22668%3B …	.	Pentatricopeptide repeat (PPR) superfamily protein%3B CONTAINS InterPro DOMAIN/s: Pentatricopeptide repeat (InterPro:IPR002885)%3B BEST Arabidopsis thaliana protein match is: Tetratricopeptide repeat (TPR)-like superfamily protein (TAIR:AT3G06920.1)%3B Has 23089 Blast hits to 6463 proteins in 161 species: Archae - 1%3B Bacteria - 0%3B Metazoa - 25%3B Fungi - 48%3B Plants - 22668%3B Viruses - 0%3B…	scaffold_2	version-2	gene	14823108	14826212	0.62	-	.		.	.	.	.	.	.	.	.	.	.	.	.	.	KK_arenosa	MZ_arenosa	AFDabs	DD	.	.	.	.	.	.	.	.	.	.	.	.	.
AL7G17030	AT4G34260	829575	OG0003992	FUC95A	protein_coding	1%2C2-alpha-L-fucosidase	.	computational_FUC95A%3B FUNCTIONS IN: 1%2C2-alpha-L-fucosidase activity%3B INVOLVED IN: biological_process unknown%3B LOCATED IN: endomembrane system%3B EXPRESSED IN: 22 plant structures%3B EXPRESSED DURING: 13 growth stages%3B CONTAINS InterPro DOMAIN/s: Six-hairpin glycosidase-like (InterPro:IPR008928)%2C Uncharacterised conserved protein UCP007663 (InterPro:IPR016518)%3B Has 1349 Blast hits to…	.	FUC95A%3B FUNCTIONS IN: 1%2C2-alpha-L-fucosidase activity%3B INVOLVED IN: biological_process unknown%3B LOCATED IN: endomembrane system%3B EXPRESSED IN: 22 plant structures%3B EXPRESSED DURING: 13 growth stages%3B CONTAINS InterPro DOMAIN/s: Six-hairpin glycosidase-like (InterPro:IPR008928)%2C Uncharacterised conserved protein UCP007663 (InterPro:IPR016518)%3B Has 1349 Blast hits to 1316 proteins…	scaffold_7	version-2	gene	2858681	2862590	0.47	-	.	mutant can bind more Al on cell wall and is therefore more tolerant [Ean et al. 2018]	.	.	.	.	.	.	.	.	.	.	.	.	.	KK_arenosa	MZ_arenosa	NIELSEN	FST	.	.	.	.	.	.	.	.	.	.	.	.	.
AL7G35050	AT4G19050	827643	OG0012696	.	protein_coding	NB-ARC domain-containing disease resistance protein	.	computational_NB-ARC domain-containing disease resistance protein%3B FUNCTIONS IN: ATP binding%3B INVOLVED IN: defense response%2C apoptosis%3B LOCATED IN: cellular_component unknown%3B EXPRESSED IN: 20 plant structures%3B EXPRESSED DURING: 9 growth stages%3B CONTAINS InterPro DOMAIN/s: NB-ARC (InterPro:IPR002182)%2C Disease resistance protein (InterPro:IPR000767)%3B BEST Arabidopsis thaliana pro…	.	NB-ARC domain-containing disease resistance protein%3B FUNCTIONS IN: ATP binding%3B INVOLVED IN: defense response%2C apoptosis%3B LOCATED IN: cellular_component unknown%3B EXPRESSED IN: 20 plant structures%3B EXPRESSED DURING: 9 growth stages%3B CONTAINS InterPro DOMAIN/s: NB-ARC (InterPro:IPR002182)%2C Disease resistance protein (InterPro:IPR000767)%3B BEST Arabidopsis thaliana protein match is:…	scaffold_7	version-2	gene	10413878	10418226	0.61	+	.	GWAS association with H2O2 tolerance	.	.	.	.	.	.	.	.	.	.	.	.	.	KK_arenosa	MZ_arenosa	FST	AFDabs	scaffold_7	10414575	stop_gained	0.861111	0.375	.	.	.	.	.	.	.	.
AL7G35050	AT4G19050	827643	OG0012696	.	protein_coding	NB-ARC domain-containing disease resistance protein	.	computational_NB-ARC domain-containing disease resistance protein%3B FUNCTIONS IN: ATP binding%3B INVOLVED IN: defense response%2C apoptosis%3B LOCATED IN: cellular_component unknown%3B EXPRESSED IN: 20 plant structures%3B EXPRESSED DURING: 9 growth stages%3B CONTAINS InterPro DOMAIN/s: NB-ARC (InterPro:IPR002182)%2C Disease resistance protein (InterPro:IPR000767)%3B BEST Arabidopsis thaliana pro…	.	NB-ARC domain-containing disease resistance protein%3B FUNCTIONS IN: ATP binding%3B INVOLVED IN: defense response%2C apoptosis%3B LOCATED IN: cellular_component unknown%3B EXPRESSED IN: 20 plant structures%3B EXPRESSED DURING: 9 growth stages%3B CONTAINS InterPro DOMAIN/s: NB-ARC (InterPro:IPR002182)%2C Disease resistance protein (InterPro:IPR000767)%3B BEST Arabidopsis thaliana protein match is:…	scaffold_7	version-2	gene	10413878	10418226	0.61	+	.	GWAS association with H2O2 tolerance	.	.	.	.	.	.	.	.	.	.	.	.	.	KK_arenosa	MZ_arenosa	FST	AFDabs	scaffold_7	10414575	stop_gained	0.861111	0.375	.	.	.	.	.	.	.	.
AL7G35050	AT4G19050	827643	OG0012696	.	protein_coding	NB-ARC domain-containing disease resistance protein	.	computational_NB-ARC domain-containing disease resistance protein%3B FUNCTIONS IN: ATP binding%3B INVOLVED IN: defense response%2C apoptosis%3B LOCATED IN: cellular_component unknown%3B EXPRESSED IN: 20 plant structures%3B EXPRESSED DURING: 9 growth stages%3B CONTAINS InterPro DOMAIN/s: NB-ARC (InterPro:IPR002182)%2C Disease resistance protein (InterPro:IPR000767)%3B BEST Arabidopsis thaliana pro…	.	NB-ARC domain-containing disease resistance protein%3B FUNCTIONS IN: ATP binding%3B INVOLVED IN: defense response%2C apoptosis%3B LOCATED IN: cellular_component unknown%3B EXPRESSED IN: 20 plant structures%3B EXPRESSED DURING: 9 growth stages%3B CONTAINS InterPro DOMAIN/s: NB-ARC (InterPro:IPR002182)%2C Disease resistance protein (InterPro:IPR000767)%3B BEST Arabidopsis thaliana protein match is:…	scaffold_7	version-2	gene	10413878	10418226	0.61	+	.	GWAS association with H2O2 tolerance	.	.	.	.	.	.	.	.	.	.	.	.	.	KK_arenosa	MZ_arenosa	FST	FST	scaffold_7	10414575	stop_gained	0.861111	0.375	.	.	.	.	.	.	.	.
AL7G35050	AT4G19050	827643	OG0012696	.	protein_coding	NB-ARC domain-containing disease resistance protein	.	computational_NB-ARC domain-containing disease resistance protein%3B FUNCTIONS IN: ATP binding%3B INVOLVED IN: defense response%2C apoptosis%3B LOCATED IN: cellular_component unknown%3B EXPRESSED IN: 20 plant structures%3B EXPRESSED DURING: 9 growth stages%3B CONTAINS InterPro DOMAIN/s: NB-ARC (InterPro:IPR002182)%2C Disease resistance protein (InterPro:IPR000767)%3B BEST Arabidopsis thaliana pro…	.	NB-ARC domain-containing disease resistance protein%3B FUNCTIONS IN: ATP binding%3B INVOLVED IN: defense response%2C apoptosis%3B LOCATED IN: cellular_component unknown%3B EXPRESSED IN: 20 plant structures%3B EXPRESSED DURING: 9 growth stages%3B CONTAINS InterPro DOMAIN/s: NB-ARC (InterPro:IPR002182)%2C Disease resistance protein (InterPro:IPR000767)%3B BEST Arabidopsis thaliana protein match is:…	scaffold_7	version-2	gene	10413878	10418226	0.61	+	.	GWAS association with H2O2 tolerance	.	.	.	.	.	.	.	.	.	.	.	.	.	KK_arenosa	MZ_arenosa	FST	FLK	scaffold_7	10414575	stop_gained	0.861111	0.375	.	.	.	.	.	.	.	.
AL7G35050	AT4G19050	827643	OG0012696	.	protein_coding	NB-ARC domain-containing disease resistance protein	.	computational_NB-ARC domain-containing disease resistance protein%3B FUNCTIONS IN: ATP binding%3B INVOLVED IN: defense response%2C apoptosis%3B LOCATED IN: cellular_component unknown%3B EXPRESSED IN: 20 plant structures%3B EXPRESSED DURING: 9 growth stages%3B CONTAINS InterPro DOMAIN/s: NB-ARC (InterPro:IPR002182)%2C Disease resistance protein (InterPro:IPR000767)%3B BEST Arabidopsis thaliana pro…	.	NB-ARC domain-containing disease resistance protein%3B FUNCTIONS IN: ATP binding%3B INVOLVED IN: defense response%2C apoptosis%3B LOCATED IN: cellular_component unknown%3B EXPRESSED IN: 20 plant structures%3B EXPRESSED DURING: 9 growth stages%3B CONTAINS InterPro DOMAIN/s: NB-ARC (InterPro:IPR002182)%2C Disease resistance protein (InterPro:IPR000767)%3B BEST Arabidopsis thaliana protein match is:…	scaffold_7	version-2	gene	10413878	10418226	0.61	+	.	GWAS association with H2O2 tolerance	.	.	.	.	.	.	.	.	.	.	.	.	.	KK_arenosa	MZ_arenosa	AFDabs	AFDabs	scaffold_7	10414575	stop_gained	0.861111	0.375	.	.	.	.	.	.	.	.
AL7G35050	AT4G19050	827643	OG0012696	.	protein_coding	NB-ARC domain-containing disease resistance protein	.	computational_NB-ARC domain-containing disease resistance protein%3B FUNCTIONS IN: ATP binding%3B INVOLVED IN: defense response%2C apoptosis%3B LOCATED IN: cellular_component unknown%3B EXPRESSED IN: 20 plant structures%3B EXPRESSED DURING: 9 growth stages%3B CONTAINS InterPro DOMAIN/s: NB-ARC (InterPro:IPR002182)%2C Disease resistance protein (InterPro:IPR000767)%3B BEST Arabidopsis thaliana pro…	.	NB-ARC domain-containing disease resistance protein%3B FUNCTIONS IN: ATP binding%3B INVOLVED IN: defense response%2C apoptosis%3B LOCATED IN: cellular_component unknown%3B EXPRESSED IN: 20 plant structures%3B EXPRESSED DURING: 9 growth stages%3B CONTAINS InterPro DOMAIN/s: NB-ARC (InterPro:IPR002182)%2C Disease resistance protein (InterPro:IPR000767)%3B BEST Arabidopsis thaliana protein match is:…	scaffold_7	version-2	gene	10413878	10418226	0.61	+	.	GWAS association with H2O2 tolerance	.	.	.	.	.	.	.	.	.	.	.	.	.	KK_arenosa	MZ_arenosa	AFDabs	AFDabs	scaffold_7	10414575	stop_gained	0.861111	0.375	.	.	.	.	.	.	.	.
AL7G35050	AT4G19050	827643	OG0012696	.	protein_coding	NB-ARC domain-containing disease resistance protein	.	computational_NB-ARC domain-containing disease resistance protein%3B FUNCTIONS IN: ATP binding%3B INVOLVED IN: defense response%2C apoptosis%3B LOCATED IN: cellular_component unknown%3B EXPRESSED IN: 20 plant structures%3B EXPRESSED DURING: 9 growth stages%3B CONTAINS InterPro DOMAIN/s: NB-ARC (InterPro:IPR002182)%2C Disease resistance protein (InterPro:IPR000767)%3B BEST Arabidopsis thaliana pro…	.	NB-ARC domain-containing disease resistance protein%3B FUNCTIONS IN: ATP binding%3B INVOLVED IN: defense response%2C apoptosis%3B LOCATED IN: cellular_component unknown%3B EXPRESSED IN: 20 plant structures%3B EXPRESSED DURING: 9 growth stages%3B CONTAINS InterPro DOMAIN/s: NB-ARC (InterPro:IPR002182)%2C Disease resistance protein (InterPro:IPR000767)%3B BEST Arabidopsis thaliana protein match is:…	scaffold_7	version-2	gene	10413878	10418226	0.61	+	.	GWAS association with H2O2 tolerance	.	.	.	.	.	.	.	.	.	.	.	.	.	KK_arenosa	MZ_arenosa	AFDabs	FST	scaffold_7	10414575	stop_gained	0.861111	0.375	.	.	.	.	.	.	.	.
AL7G35050	AT4G19050	827643	OG0012696	.	protein_coding	NB-ARC domain-containing disease resistance protein	.	computational_NB-ARC domain-containing disease resistance protein%3B FUNCTIONS IN: ATP binding%3B INVOLVED IN: defense response%2C apoptosis%3B LOCATED IN: cellular_component unknown%3B EXPRESSED IN: 20 plant structures%3B EXPRESSED DURING: 9 growth stages%3B CONTAINS InterPro DOMAIN/s: NB-ARC (InterPro:IPR002182)%2C Disease resistance protein (InterPro:IPR000767)%3B BEST Arabidopsis thaliana pro…	.	NB-ARC domain-containing disease resistance protein%3B FUNCTIONS IN: ATP binding%3B INVOLVED IN: defense response%2C apoptosis%3B LOCATED IN: cellular_component unknown%3B EXPRESSED IN: 20 plant structures%3B EXPRESSED DURING: 9 growth stages%3B CONTAINS InterPro DOMAIN/s: NB-ARC (InterPro:IPR002182)%2C Disease resistance protein (InterPro:IPR000767)%3B BEST Arabidopsis thaliana protein match is:…	scaffold_7	version-2	gene	10413878	10418226	0.61	+	.	GWAS association with H2O2 tolerance	.	.	.	.	.	.	.	.	.	.	.	.	.	KK_arenosa	MZ_arenosa	AFDabs	FST	scaffold_7	10414575	stop_gained	0.861111	0.375	.	.	.	.	.	.	.	.
AL7G35050	AT4G19050	827643	OG0012696	.	protein_coding	NB-ARC domain-containing disease resistance protein	.	computational_NB-ARC domain-containing disease resistance protein%3B FUNCTIONS IN: ATP binding%3B INVOLVED IN: defense response%2C apoptosis%3B LOCATED IN: cellular_component unknown%3B EXPRESSED IN: 20 plant structures%3B EXPRESSED DURING: 9 growth stages%3B CONTAINS InterPro DOMAIN/s: NB-ARC (InterPro:IPR002182)%2C Disease resistance protein (InterPro:IPR000767)%3B BEST Arabidopsis thaliana pro…	.	NB-ARC domain-containing disease resistance protein%3B FUNCTIONS IN: ATP binding%3B INVOLVED IN: defense response%2C apoptosis%3B LOCATED IN: cellular_component unknown%3B EXPRESSED IN: 20 plant structures%3B EXPRESSED DURING: 9 growth stages%3B CONTAINS InterPro DOMAIN/s: NB-ARC (InterPro:IPR002182)%2C Disease resistance protein (InterPro:IPR000767)%3B BEST Arabidopsis thaliana protein match is:…	scaffold_7	version-2	gene	10413878	10418226	0.61	+	.	GWAS association with H2O2 tolerance	.	.	.	.	.	.	.	.	.	.	.	.	.	KK_arenosa	MZ_arenosa	AFDabs	FLK	scaffold_7	10414575	stop_gained	0.861111	0.375	.	.	.	.	.	.	.	.
AL7G35050	AT4G19050	827643	OG0012696	.	protein_coding	NB-ARC domain-containing disease resistance protein	.	computational_NB-ARC domain-containing disease resistance protein%3B FUNCTIONS IN: ATP binding%3B INVOLVED IN: defense response%2C apoptosis%3B LOCATED IN: cellular_component unknown%3B EXPRESSED IN: 20 plant structures%3B EXPRESSED DURING: 9 growth stages%3B CONTAINS InterPro DOMAIN/s: NB-ARC (InterPro:IPR002182)%2C Disease resistance protein (InterPro:IPR000767)%3B BEST Arabidopsis thaliana pro…	.	NB-ARC domain-containing disease resistance protein%3B FUNCTIONS IN: ATP binding%3B INVOLVED IN: defense response%2C apoptosis%3B LOCATED IN: cellular_component unknown%3B EXPRESSED IN: 20 plant structures%3B EXPRESSED DURING: 9 growth stages%3B CONTAINS InterPro DOMAIN/s: NB-ARC (InterPro:IPR002182)%2C Disease resistance protein (InterPro:IPR000767)%3B BEST Arabidopsis thaliana protein match is:…	scaffold_7	version-2	gene	10413878	10418226	0.61	+	.	GWAS association with H2O2 tolerance	.	.	.	.	.	.	.	.	.	.	.	.	.	KK_arenosa	MZ_arenosa	AFDabs	FLK	scaffold_7	10414575	stop_gained	0.861111	0.375	.	.	.	.	.	.	.	.
AL7G44170	AT5G35370	833498	OG0017360	.	protein_coding	S-locus lectin protein kinase family protein	.	computational_S-locus lectin protein kinase family protein%3B FUNCTIONS IN: in 6 functions%3B INVOLVED IN: protein amino acid phosphorylation%3B LOCATED IN: endomembrane system%3B EXPRESSED IN: 11 plant structures%3B EXPRESSED DURING: 6 growth stages%3B CONTAINS InterPro DOMAIN/s: Curculin-like (mannose-binding) lectin (InterPro:IPR001480)%2C Protein kinase%2C ATP binding site (InterPro:IPR017441…	.	S-locus lectin protein kinase family protein%3B FUNCTIONS IN: in 6 functions%3B INVOLVED IN: protein amino acid phosphorylation%3B LOCATED IN: endomembrane system%3B EXPRESSED IN: 11 plant structures%3B EXPRESSED DURING: 6 growth stages%3B CONTAINS InterPro DOMAIN/s: Curculin-like (mannose-binding) lectin (InterPro:IPR001480)%2C Protein kinase%2C ATP binding site (InterPro:IPR017441)%2C Serine/th…	scaffold_7	version-2	gene	18186559	18189363	0.04	-	.		.	.	.	.	.	.	.	.	.	.	.	.	.	KK_arenosa	MZ_arenosa	KK_higheffectSNP	NIELSEN	scaffold_7	18188125	splice_donor_variant&intron_variant	0.916667	0.28125	.	.	.	.	.	.	.	.
AL8G14060	AT5G45140	834550	OG0019257	NRPC2	protein_coding	nuclear RNA polymerase C2	nuclear RNA polymerase C2	computational_nuclear RNA polymerase C2 (NRPC2)%3B FUNCTIONS IN: DNA-directed RNA polymerase activity%2C ribonucleoside binding%2C DNA binding%3B INVOLVED IN: transcription%3B LOCATED IN: cellular_component unknown%3B EXPRESSED IN: 22 plant structures%3B EXPRESSED DURING: 13 growth stages%3B CONTAINS InterPro DOMAIN/s: DNA-directed RNA polymerase%2C subunit 2%2C domain 6 (InterPro:IPR007120)%2C R…	Encodes a subunit of RNA polymerase III (aka RNA polymerase C).	nuclear RNA polymerase C2 (NRPC2)%3B FUNCTIONS IN: DNA-directed RNA polymerase activity%2C ribonucleoside binding%2C DNA binding%3B INVOLVED IN: transcription%3B LOCATED IN: cellular_component unknown%3B EXPRESSED IN: 22 plant structures%3B EXPRESSED DURING: 13 growth stages%3B CONTAINS InterPro DOMAIN/s: DNA-directed RNA polymerase%2C subunit 2%2C domain 6 (InterPro:IPR007120)%2C RNA polymerase …	scaffold_8	version-2	gene	2474473	2485528	0.34	+	.		.	.	.	.	.	.	.	.	.	.	.	.	.	KK_arenosa	MZ_arenosa	DD	AFDabs	.	.	.	.	.	.	.	.	.	.	.	.	.
AL8G14060	AT5G45140	834550	OG0019257	NRPC2	protein_coding	nuclear RNA polymerase C2	nuclear RNA polymerase C2	computational_nuclear RNA polymerase C2 (NRPC2)%3B FUNCTIONS IN: DNA-directed RNA polymerase activity%2C ribonucleoside binding%2C DNA binding%3B INVOLVED IN: transcription%3B LOCATED IN: cellular_component unknown%3B EXPRESSED IN: 22 plant structures%3B EXPRESSED DURING: 13 growth stages%3B CONTAINS InterPro DOMAIN/s: DNA-directed RNA polymerase%2C subunit 2%2C domain 6 (InterPro:IPR007120)%2C R…	Encodes a subunit of RNA polymerase III (aka RNA polymerase C).	nuclear RNA polymerase C2 (NRPC2)%3B FUNCTIONS IN: DNA-directed RNA polymerase activity%2C ribonucleoside binding%2C DNA binding%3B INVOLVED IN: transcription%3B LOCATED IN: cellular_component unknown%3B EXPRESSED IN: 22 plant structures%3B EXPRESSED DURING: 13 growth stages%3B CONTAINS InterPro DOMAIN/s: DNA-directed RNA polymerase%2C subunit 2%2C domain 6 (InterPro:IPR007120)%2C RNA polymerase …	scaffold_8	version-2	gene	2474473	2485528	0.34	+	.		.	.	.	.	.	.	.	.	.	.	.	.	.	KK_arenosa	MZ_arenosa	DD	FST	.	.	.	.	.	.	.	.	.	.	.	.	.
AL8G14060	AT5G45140	834550	OG0019257	NRPC2	protein_coding	nuclear RNA polymerase C2	nuclear RNA polymerase C2	computational_nuclear RNA polymerase C2 (NRPC2)%3B FUNCTIONS IN: DNA-directed RNA polymerase activity%2C ribonucleoside binding%2C DNA binding%3B INVOLVED IN: transcription%3B LOCATED IN: cellular_component unknown%3B EXPRESSED IN: 22 plant structures%3B EXPRESSED DURING: 13 growth stages%3B CONTAINS InterPro DOMAIN/s: DNA-directed RNA polymerase%2C subunit 2%2C domain 6 (InterPro:IPR007120)%2C R…	Encodes a subunit of RNA polymerase III (aka RNA polymerase C).	nuclear RNA polymerase C2 (NRPC2)%3B FUNCTIONS IN: DNA-directed RNA polymerase activity%2C ribonucleoside binding%2C DNA binding%3B INVOLVED IN: transcription%3B LOCATED IN: cellular_component unknown%3B EXPRESSED IN: 22 plant structures%3B EXPRESSED DURING: 13 growth stages%3B CONTAINS InterPro DOMAIN/s: DNA-directed RNA polymerase%2C subunit 2%2C domain 6 (InterPro:IPR007120)%2C RNA polymerase …	scaffold_8	version-2	gene	2474473	2485528	0.34	+	.		.	.	.	.	.	.	.	.	.	.	.	.	.	KK_arenosa	MZ_arenosa	DD	DXY	.	.	.	.	.	.	.	.	.	.	.	.	.
AL1G53790	AT1G47560		OG0003213	SEC3B	protein_coding	exocyst complex component sec3B	exocyst complex component sec3B	exocyst complex component sec3B (SEC3B)%3B CONTAINS InterPro DOMAIN/s: Exocyst complex%2C component Exoc1 (InterPro:IPR019160)%3B BEST Arabidopsis thaliana protein match is: exocyst complex component sec3A (TAIR:AT1G47550.1)%3B Has 437 Blast hits to 422 proteins in 153 species: Archae - 2%3B Bacteria - 6%3B Metazoa - 176%3B Fungi - 108%3B Plants - 103%3B Viruses - 0%3B Other Eukaryotes - 42 (sour…	Encodes a member of the exocyst complex gene family. The exocyst is a protein complex involved in tethering vesicles to the plasma membrane during regulated or polarized secretion.	exocyst complex component sec3B (SEC3B)%3B CONTAINS InterPro DOMAIN/s: Exocyst complex%2C component Exoc1 (InterPro:IPR019160)%3B BEST Arabidopsis thaliana protein match is: exocyst complex component sec3A (TAIR:AT1G47550.1)%3B Has 437 Blast hits to 422 proteins in 153 species: Archae - 2%3B Bacteria - 6%3B Metazoa - 176%3B Fungi - 108%3B Plants - 103%3B Viruses - 0%3B Other Eukaryotes - 42 (sour…	scaffold_1	version-2	gene	23756435	23763140	0.55	+	.															KK_halleri	MZ_arenosa	NIELSEN	FST	.	.	.	.	.	.	.	.	.	.	.	.	.
AL1G53790	AT1G47550		OG0003213	SEC3A	protein_coding	exocyst complex component sec3A	exocyst complex component sec3A	exocyst complex component sec3A (SEC3A)%3B INVOLVED IN: biological_process unknown%3B LOCATED IN: plasma membrane%2C exocyst%3B EXPRESSED IN: male gametophyte%2C cultured cell%2C pollen tube%3B EXPRESSED DURING: L mature pollen stage%2C M germinated pollen stage%3B CONTAINS InterPro DOMAIN/s: Exocyst complex%2C component Exoc1 (InterPro:IPR019160)%3B BEST Arabidopsis thaliana protein match is: ex…	Encodes a member of the exocyst complex gene family. The exocyst is a protein complex involved in tethering vesicles to the plasma membrane during regulated or polarized secretion.	exocyst complex component sec3A (SEC3A)%3B INVOLVED IN: biological_process unknown%3B LOCATED IN: plasma membrane%2C exocyst%3B EXPRESSED IN: male gametophyte%2C cultured cell%2C pollen tube%3B EXPRESSED DURING: L mature pollen stage%2C M germinated pollen stage%3B CONTAINS InterPro DOMAIN/s: Exocyst complex%2C component Exoc1 (InterPro:IPR019160)%3B BEST Arabidopsis thaliana protein match is: ex…	scaffold_1	version-2	gene	23756435	23763140	0.55	+	.															KK_halleri	MZ_arenosa	NIELSEN	FST	.	.	.	.	.	.	.	.	.	.	.	.	.
AL1G64230	AT1G55970		OG0022383	HAC4	protein_coding	histone acetyltransferase of the CBP family 4	histone acetyltransferase of the CBP family 4	histone acetyltransferase of the CBP family 4 (HAC4)%3B FUNCTIONS IN: histone acetyltransferase activity%3B INVOLVED IN: regulation of transcription%2C D-dependent%3B LOCATED IN: nucleus%2C chloroplast%3B EXPRESSED IN: 23 plant structures%3B EXPRESSED DURING: 13 growth stages%3B CONTAINS InterPro DOMAIN/s: Zinc finger%2C PHD-type%2C conserved site (InterPro:IPR019786)%2C Zinc finger%2C TAZ-type (…	HAC4 is most likely to be an expressed pseudogene that lacks HAT function. there is a single nucleotide deletion in both the HAC4 genomic and cD sequences relative to its homologs. The resulting frameshift within the open reading frame causes a stop codon to occur within the predicted acetyltransferase catalytic domain.	histone acetyltransferase of the CBP family 4 (HAC4)%3B FUNCTIONS IN: histone acetyltransferase activity%3B INVOLVED IN: regulation of transcription%2C D-dependent%3B LOCATED IN: nucleus%2C chloroplast%3B EXPRESSED IN: 23 plant structures%3B EXPRESSED DURING: 13 growth stages%3B CONTAINS InterPro DOMAIN/s: Zinc finger%2C PHD-type%2C conserved site (InterPro:IPR019786)%2C Zinc finger%2C TAZ-type (…	scaffold_1	version-2	gene	29631795	29638336	0.17	-	.															KK_halleri	MZ_arenosa	High_effect_SNP	AFDabs	scaffold_1	29632542	stop_gained	0.9	0	.	.	.	.	.	.	.	.
AL3G14930											scaffold_3	version-2	gene	1665086	1666120	0.32	+	.															KK_halleri	MZ_arenosa	High_effect_SNP	FST	scaffold_3	1665228	start_lost	0.9	0.357142857142857	.	.	.	.	.	.	.	.
AL3G41970	AT2G04270		OG0013260	RNEE/G	protein_coding	Rse E/G-like protein	Rse E/G-like	Rse E/G-like (RNEE/G)%3B FUNCTIONS IN: endoribonuclease activity%3B INVOLVED IN: chloroplast organization%3B LOCATED IN: chloroplast%3B EXPRESSED IN: 21 plant structures%3B EXPRESSED DURING: 14 growth stages%3B CONTAINS InterPro DOMAIN/s: Nucleic acid-binding%2C OB-fold (InterPro:IPR012340)%2C Carbohydrate-binding-like fold (InterPro:IPR013784)%2C Ribonuclease E/G (InterPro:IPR004659)%2C Glycosid…	Similar to E.coli endoribonuclease E. Functions as a ribonuclease%2C is located in the chloroplast%2C and is involved in chloroplast development. Loss of function mutants are white and arrest at the cotyledon stage. The phenotype is rescued by providing sucrose.	Rse E/G-like (RNEE/G)%3B FUNCTIONS IN: endoribonuclease activity%3B INVOLVED IN: chloroplast organization%3B LOCATED IN: chloroplast%3B EXPRESSED IN: 21 plant structures%3B EXPRESSED DURING: 14 growth stages%3B CONTAINS InterPro DOMAIN/s: Nucleic acid-binding%2C OB-fold (InterPro:IPR012340)%2C Carbohydrate-binding-like fold (InterPro:IPR013784)%2C Ribonuclease E/G (InterPro:IPR004659)%2C Glycosid…	scaffold_3	version-2	gene	13301485	13306634	0.34	+	.															KK_halleri	MZ_arenosa	Indel	NIELSEN	.	.	.	.	.	scaffold_3	13303633	0	0.571428571428571	frameshift_variant	scaffold_3	13303634	frameshift_variant
AL7G35050	AT4G19050		OG0012696		protein_coding	NB-ARC domain-containing disease resistance protein		NB-ARC domain-containing disease resistance protein%3B FUNCTIONS IN: ATP binding%3B INVOLVED IN: defense response%2C apoptosis%3B LOCATED IN: cellular_component unknown%3B EXPRESSED IN: 20 plant structures%3B EXPRESSED DURING: 9 growth stages%3B CONTAINS InterPro DOMAIN/s: NB-ARC (InterPro:IPR002182)%2C Disease resistance protein (InterPro:IPR000767)%3B BEST Arabidopsis thaliana protein match is:…		NB-ARC domain-containing disease resistance protein%3B FUNCTIONS IN: ATP binding%3B INVOLVED IN: defense response%2C apoptosis%3B LOCATED IN: cellular_component unknown%3B EXPRESSED IN: 20 plant structures%3B EXPRESSED DURING: 9 growth stages%3B CONTAINS InterPro DOMAIN/s: NB-ARC (InterPro:IPR002182)%2C Disease resistance protein (InterPro:IPR000767)%3B BEST Arabidopsis thaliana protein match is:…	scaffold_7	version-2	gene	10413878	10418226	0.61	+	.															KK_halleri	MZ_arenosa	High_effect_SNP	FLK	scaffold_7	10415702	stop_gained	1	0.142857142857143	.	.	.	.	.	.	.	.
AL7G44170	AT5G35370		OG0017360		protein_coding	S-locus lectin protein kinase family protein		S-locus lectin protein kinase family protein%3B FUNCTIONS IN: in 6 functions%3B INVOLVED IN: protein amino acid phosphorylation%3B LOCATED IN: endomembrane system%3B EXPRESSED IN: 11 plant structures%3B EXPRESSED DURING: 6 growth stages%3B CONTAINS InterPro DOMAIN/s: Curculin-like (mannose-binding) lectin (InterPro:IPR001480)%2C Protein kinase%2C ATP binding site (InterPro:IPR017441)%2C Serine/th…		S-locus lectin protein kinase family protein%3B FUNCTIONS IN: in 6 functions%3B INVOLVED IN: protein amino acid phosphorylation%3B LOCATED IN: endomembrane system%3B EXPRESSED IN: 11 plant structures%3B EXPRESSED DURING: 6 growth stages%3B CONTAINS InterPro DOMAIN/s: Curculin-like (mannose-binding) lectin (InterPro:IPR001480)%2C Protein kinase%2C ATP binding site (InterPro:IPR017441)%2C Serine/th…	scaffold_7	version-2	gene	18186559	18189363	0.04	-	.															KK_halleri	MZ_arenosa	High_effect_SNP	NIELSEN	scaffold_7	18188302	stop_gained	0.1	0.571428571428571	.	.	.	.	.	.	.	.
AL7G47470	AT5G41790		OG0018952	CIP1	protein_coding	COP1-interactive protein 1	COP1-interactive protein 1	COP1-interactive protein 1 (CIP1)%3B FUNCTIONS IN: protein binding%3B INVOLVED IN: regulation of protein import into nucleus%3B LOCATED IN: cytoskeleton%2C plasma membrane%2C chloroplast%2C vacuole%3B EXPRESSED IN: 24 plant structures%3B EXPRESSED DURING: 13 growth stages%3B CONTAINS InterPro DOMAIN/s: Prefoldin (InterPro:IPR009053)%3B BEST Arabidopsis thaliana protein match is: myosin heavy chai…	encodes a protein that physically interacts specifically with the putative coiled-coil region of COP1 in vitro. In hypocotyl and cotyledon protoplasts%2C it is associated to the cytoskeleton%2C but not in the root. expression is not regulated by light.	COP1-interactive protein 1 (CIP1)%3B FUNCTIONS IN: protein binding%3B INVOLVED IN: regulation of protein import into nucleus%3B LOCATED IN: cytoskeleton%2C plasma membrane%2C chloroplast%2C vacuole%3B EXPRESSED IN: 24 plant structures%3B EXPRESSED DURING: 13 growth stages%3B CONTAINS InterPro DOMAIN/s: Prefoldin (InterPro:IPR009053)%3B BEST Arabidopsis thaliana protein match is: myosin heavy chai…	scaffold_7	version-2	gene	21269375	21275868	0.37	-	.	2 fold expression change under Cs toxicity [Hampton, C. R. et al., 2004]														KK_halleri	MZ_arenosa	Indel	DXY	.	.	.	.	.	scaffold_7	21275031	1	0	splice_donor_variant&intron_variant	scaffold_7	21275032	splice_donor_variant&intron_variant
AL8G35430	AT5G59270		OG0001381		protein_coding	Concanavalin A-like lectin protein kinase family protein		Concanavalin A-like lectin protein kinase family protein%3B FUNCTIONS IN: kinase activity%3B INVOLVED IN: protein amino acid phosphorylation%3B LOCATED IN: endomembrane system%3B CONTAINS InterPro DOMAIN/s: Legume lectin%2C beta chain (InterPro:IPR001220)%2C Protein kinase%2C ATP binding site (InterPro:IPR017441)%2C Serine/threonine-protein kinase domain (InterPro:IPR002290)%2C Serine/threonine-p…		Concanavalin A-like lectin protein kinase family protein%3B FUNCTIONS IN: kinase activity%3B INVOLVED IN: protein amino acid phosphorylation%3B LOCATED IN: endomembrane system%3B CONTAINS InterPro DOMAIN/s: Legume lectin%2C beta chain (InterPro:IPR001220)%2C Protein kinase%2C ATP binding site (InterPro:IPR017441)%2C Serine/threonine-protein kinase domain (InterPro:IPR002290)%2C Serine/threonine-p…	scaffold_8	version-2	gene	18931337	18936777	0.05	+	.															KK_halleri	MZ_arenosa	Indel	NIELSEN	.	.	.	.	.	scaffold_8	18934423	0	0.5	frameshift_variant&splice_acceptor_variant&splice_region_variant&intron_variant	scaffold_8	18934424	splice_acceptor_variant&intron_variant
AL8G35430	AT5G59260		OG0001381		protein_coding	Concanavalin A-like lectin protein kinase family protein		Concanavalin A-like lectin protein kinase family protein%3B FUNCTIONS IN: protein serine/threonine kinase activity%2C binding%2C protein kinase activity%2C kinase activity%2C ATP binding%3B INVOLVED IN: protein amino acid phosphorylation%3B LOCATED IN: endomembrane system%3B EXPRESSED IN: hypocotyl%2C root%2C stamen%3B EXPRESSED DURING: 4 anthesis%3B CONTAINS InterPro DOMAIN/s: Legume lectin%2C b…		Concanavalin A-like lectin protein kinase family protein%3B FUNCTIONS IN: protein serine/threonine kinase activity%2C binding%2C protein kinase activity%2C kinase activity%2C ATP binding%3B INVOLVED IN: protein amino acid phosphorylation%3B LOCATED IN: endomembrane system%3B EXPRESSED IN: hypocotyl%2C root%2C stamen%3B EXPRESSED DURING: 4 anthesis%3B CONTAINS InterPro DOMAIN/s: Legume lectin%2C b…	scaffold_8	version-2	gene	18931337	18936777	0.05	+	.															KK_halleri	MZ_arenosa	Indel	NIELSEN	.	.	.	.	.	scaffold_8	18934423	0	0.5	frameshift_variant&splice_acceptor_variant&splice_region_variant&intron_variant	scaffold_8	18934424	splice_acceptor_variant&intron_variant
AL8G44830	AT5G66660		OG0008074		protein_coding	pectinesterase%2C putative (DUF677)		Protein of unknown function (DUF677)%3B FUNCTIONS IN: molecular_function unknown%3B INVOLVED IN: biological_process unknown%3B LOCATED IN: chloroplast%3B EXPRESSED IN: inflorescence meristem%3B CONTAINS InterPro DOMAIN/s: Protein of unknown function DUF677 (InterPro:IPR007749)%3B BEST Arabidopsis thaliana protein match is: Protein of unknown function (DUF677) (TAIR:AT5G66670.2)%3B Has 1807 Blast …		Protein of unknown function (DUF677)%3B FUNCTIONS IN: molecular_function unknown%3B INVOLVED IN: biological_process unknown%3B LOCATED IN: chloroplast%3B EXPRESSED IN: inflorescence meristem%3B CONTAINS InterPro DOMAIN/s: Protein of unknown function DUF677 (InterPro:IPR007749)%3B BEST Arabidopsis thaliana protein match is: Protein of unknown function (DUF677) (TAIR:AT5G66670.2)%3B Has 1807 Blast …	scaffold_8	version-2	gene	22678902	22680255	0.15	+	.															KK_halleri	MZ_arenosa	Indel	FST	.	.	.	.	.	scaffold_8	22679172	0	0.428571428571429	frameshift_variant	scaffold_8	22679173	frameshift_variant
AL1G26370	AT1G14470		OG0009622	.	protein_coding	Pentatricopeptide repeat (PPR) superfamily protein	.	Pentatricopeptide repeat (PPR) superfamily protein%3B CONTAINS InterPro DOMAIN/s: Pentatricopeptide repeat (InterPro:IPR002885)%3B BEST Arabidopsis thaliana protein match is: Tetratricopeptide repeat (TPR)-like superfamily protein (TAIR:AT1G08070.1)%3B Has 45588 Blast hits to 14013 proteins in 255 species: Archae - 1%3B Bacteria - 22%3B Metazoa - 282%3B Fungi - 244%3B Plants - 44188%3B Viruses - …	.	Pentatricopeptide repeat (PPR) superfamily protein%3B CONTAINS InterPro DOMAIN/s: Pentatricopeptide repeat (InterPro:IPR002885)%3B BEST Arabidopsis thaliana protein match is: Tetratricopeptide repeat (TPR)-like superfamily protein (TAIR:AT1G08070.1)%3B Has 45588 Blast hits to 14013 proteins in 255 species: Archae - 1%3B Bacteria - 22%3B Metazoa - 282%3B Fungi - 244%3B Plants - 44188%3B Viruses - …	scaffold_1	version-2	gene	6090987	6093298	0.37	+	.															KK_arenosa	MZ_halleri	FLK	AFDabs	.	.	.	.	.	.	.	.	.	.	.	.	.
AL1G26370	AT1G14470		OG0009622	.	protein_coding	Pentatricopeptide repeat (PPR) superfamily protein	.	Pentatricopeptide repeat (PPR) superfamily protein%3B CONTAINS InterPro DOMAIN/s: Pentatricopeptide repeat (InterPro:IPR002885)%3B BEST Arabidopsis thaliana protein match is: Tetratricopeptide repeat (TPR)-like superfamily protein (TAIR:AT1G08070.1)%3B Has 45588 Blast hits to 14013 proteins in 255 species: Archae - 1%3B Bacteria - 22%3B Metazoa - 282%3B Fungi - 244%3B Plants - 44188%3B Viruses - …	.	Pentatricopeptide repeat (PPR) superfamily protein%3B CONTAINS InterPro DOMAIN/s: Pentatricopeptide repeat (InterPro:IPR002885)%3B BEST Arabidopsis thaliana protein match is: Tetratricopeptide repeat (TPR)-like superfamily protein (TAIR:AT1G08070.1)%3B Has 45588 Blast hits to 14013 proteins in 255 species: Archae - 1%3B Bacteria - 22%3B Metazoa - 282%3B Fungi - 244%3B Plants - 44188%3B Viruses - …	scaffold_1	version-2	gene	6090987	6093298	0.37	+	.															KK_arenosa	MZ_halleri	FLK	AFDabs	.	.	.	.	.	.	.	.	.	.	.	.	.
AL1G26370	AT1G14470		OG0009622	.	protein_coding	Pentatricopeptide repeat (PPR) superfamily protein	.	Pentatricopeptide repeat (PPR) superfamily protein%3B CONTAINS InterPro DOMAIN/s: Pentatricopeptide repeat (InterPro:IPR002885)%3B BEST Arabidopsis thaliana protein match is: Tetratricopeptide repeat (TPR)-like superfamily protein (TAIR:AT1G08070.1)%3B Has 45588 Blast hits to 14013 proteins in 255 species: Archae - 1%3B Bacteria - 22%3B Metazoa - 282%3B Fungi - 244%3B Plants - 44188%3B Viruses - …	.	Pentatricopeptide repeat (PPR) superfamily protein%3B CONTAINS InterPro DOMAIN/s: Pentatricopeptide repeat (InterPro:IPR002885)%3B BEST Arabidopsis thaliana protein match is: Tetratricopeptide repeat (TPR)-like superfamily protein (TAIR:AT1G08070.1)%3B Has 45588 Blast hits to 14013 proteins in 255 species: Archae - 1%3B Bacteria - 22%3B Metazoa - 282%3B Fungi - 244%3B Plants - 44188%3B Viruses - …	scaffold_1	version-2	gene	6090987	6093298	0.37	+	.															KK_arenosa	MZ_halleri	FST	AFDabs	.	.	.	.	.	.	.	.	.	.	.	.	.
AL1G26370	AT1G14470		OG0009622	.	protein_coding	Pentatricopeptide repeat (PPR) superfamily protein	.	Pentatricopeptide repeat (PPR) superfamily protein%3B CONTAINS InterPro DOMAIN/s: Pentatricopeptide repeat (InterPro:IPR002885)%3B BEST Arabidopsis thaliana protein match is: Tetratricopeptide repeat (TPR)-like superfamily protein (TAIR:AT1G08070.1)%3B Has 45588 Blast hits to 14013 proteins in 255 species: Archae - 1%3B Bacteria - 22%3B Metazoa - 282%3B Fungi - 244%3B Plants - 44188%3B Viruses - …	.	Pentatricopeptide repeat (PPR) superfamily protein%3B CONTAINS InterPro DOMAIN/s: Pentatricopeptide repeat (InterPro:IPR002885)%3B BEST Arabidopsis thaliana protein match is: Tetratricopeptide repeat (TPR)-like superfamily protein (TAIR:AT1G08070.1)%3B Has 45588 Blast hits to 14013 proteins in 255 species: Archae - 1%3B Bacteria - 22%3B Metazoa - 282%3B Fungi - 244%3B Plants - 44188%3B Viruses - …	scaffold_1	version-2	gene	6090987	6093298	0.37	+	.															KK_arenosa	MZ_halleri	FST	AFDabs	.	.	.	.	.	.	.	.	.	.	.	.	.
AL1G26380	.		.	.	.	.	.	.	.	.	scaffold_1	version-2	gene	6093357	6094128	0.05	+	.															KK_arenosa	MZ_halleri	FLK	Indel	.	.	.	.	.	.	.	.	.	.	.	.	.
AL4G31410	AT2G35360		OG0005811	.	protein_coding	ubiquitin family protein	.	ubiquitin family protein%3B CONTAINS InterPro DOMAIN/s: Ubiquitin (InterPro:IPR000626)%2C Ubiquitin supergroup (InterPro:IPR019955)%2C Domain of unknown function SAYSvFN (InterPro:IPR019387)%3B Has 81 Blast hits to 81 proteins in 37 species: Archae - 0%3B Bacteria - 0%3B Metazoa - 40%3B Fungi - 0%3B Plants - 33%3B Viruses - 0%3B Other Eukaryotes - 8 (source: NCBI BLink).	.	ubiquitin family protein%3B CONTAINS InterPro DOMAIN/s: Ubiquitin (InterPro:IPR000626)%2C Ubiquitin supergroup (InterPro:IPR019955)%2C Domain of unknown function SAYSvFN (InterPro:IPR019387)%3B Has 81 Blast hits to 81 proteins in 37 species: Archae - 0%3B Bacteria - 0%3B Metazoa - 40%3B Fungi - 0%3B Plants - 33%3B Viruses - 0%3B Other Eukaryotes - 8 (source: NCBI BLink).	scaffold_4	version-2	gene	16800766	16802702	0.26	-	.															KK_arenosa	MZ_halleri	FST	High_effect_SNP	.	.	.	.	.	.	.	.	.	.	.	.	.
AL6G35310	AT5G23980		OG0003412	FRO4	protein_coding	ferric reduction oxidase 4	ferric reduction oxidase 4	ferric reduction oxidase 4 (FRO4)%3B FUNCTIONS IN: ferric-chelate reductase activity%3B INVOLVED IN: oxidation reduction%2C N-terminal protein myristoylation%3B LOCATED IN: endomembrane system%2C integral to membrane%2C membrane%3B CONTAINS InterPro DOMAIN/s: Ferredoxin reductase-type FAD-binding domain (InterPro:IPR017927)%2C Ferric reductase%2C D binding (InterPro:IPR013121)%2C Cytochrome b245%…	Encodes a ferric chelate reductase that is expressed at low levels in roots%2Cshoots and cotyledons%2C but not flowers. Its transcription is regulated by FIT1.	ferric reduction oxidase 4 (FRO4)%3B FUNCTIONS IN: ferric-chelate reductase activity%3B INVOLVED IN: oxidation reduction%2C N-terminal protein myristoylation%3B LOCATED IN: endomembrane system%2C integral to membrane%2C membrane%3B CONTAINS InterPro DOMAIN/s: Ferredoxin reductase-type FAD-binding domain (InterPro:IPR017927)%2C Ferric reductase%2C D binding (InterPro:IPR013121)%2C Cytochrome b245%…	scaffold_6	version-2	gene	10296305	10299581	0.17	-	.		126	FRO4	ferric chelate reductase, putative				34.12	transport.metal		U. Kraemer	Cu			KK_arenosa	MZ_halleri	NIELSEN	DD	.	.	.	.	.	.	.	.	.	.	.	.	.
AL8G20240	AT5G47970		OG0018851	.	protein_coding	Aldolase-type TIM barrel family protein	.	Aldolase-type TIM barrel family protein%3B FUNCTIONS IN: tR dihydrouridine synthase activity%2C FAD binding%2C catalytic activity%3B INVOLVED IN: regulation of nitrogen utilization%2C tR processing%2C oxidation reduction%2C metabolic process%3B LOCATED IN: nucleus%2C cytoplasm%2C phragmoplast%3B EXPRESSED IN: 21 plant structures%3B EXPRESSED DURING: 13 growth stages%3B CONTAINS InterPro DOMAIN/s:…	.	Aldolase-type TIM barrel family protein%3B FUNCTIONS IN: tR dihydrouridine synthase activity%2C FAD binding%2C catalytic activity%3B INVOLVED IN: regulation of nitrogen utilization%2C tR processing%2C oxidation reduction%2C metabolic process%3B LOCATED IN: nucleus%2C cytoplasm%2C phragmoplast%3B EXPRESSED IN: 21 plant structures%3B EXPRESSED DURING: 13 growth stages%3B CONTAINS InterPro DOMAIN/s:…	scaffold_8	version-2	gene	10497424	10500478	0.37	-	.															KK_arenosa	MZ_halleri	DXY	DD	.	.	.	.	.	.	.	.	.	.	.	.	.
AL8G20240	AT5G47970		OG0018851	.	protein_coding	Aldolase-type TIM barrel family protein	.	Aldolase-type TIM barrel family protein%3B FUNCTIONS IN: tR dihydrouridine synthase activity%2C FAD binding%2C catalytic activity%3B INVOLVED IN: regulation of nitrogen utilization%2C tR processing%2C oxidation reduction%2C metabolic process%3B LOCATED IN: nucleus%2C cytoplasm%2C phragmoplast%3B EXPRESSED IN: 21 plant structures%3B EXPRESSED DURING: 13 growth stages%3B CONTAINS InterPro DOMAIN/s:…	.	Aldolase-type TIM barrel family protein%3B FUNCTIONS IN: tR dihydrouridine synthase activity%2C FAD binding%2C catalytic activity%3B INVOLVED IN: regulation of nitrogen utilization%2C tR processing%2C oxidation reduction%2C metabolic process%3B LOCATED IN: nucleus%2C cytoplasm%2C phragmoplast%3B EXPRESSED IN: 21 plant structures%3B EXPRESSED DURING: 13 growth stages%3B CONTAINS InterPro DOMAIN/s:…	scaffold_8	version-2	gene	10497424	10500478	0.37	-	.															KK_arenosa	MZ_halleri	NIELSEN	DD	.	.	.	.	.	.	.	.	.	.	.	.	.
AL8G20240	AT5G47970		OG0018851	.	protein_coding	Aldolase-type TIM barrel family protein	.	Aldolase-type TIM barrel family protein%3B FUNCTIONS IN: tR dihydrouridine synthase activity%2C FAD binding%2C catalytic activity%3B INVOLVED IN: regulation of nitrogen utilization%2C tR processing%2C oxidation reduction%2C metabolic process%3B LOCATED IN: nucleus%2C cytoplasm%2C phragmoplast%3B EXPRESSED IN: 21 plant structures%3B EXPRESSED DURING: 13 growth stages%3B CONTAINS InterPro DOMAIN/s:…	.	Aldolase-type TIM barrel family protein%3B FUNCTIONS IN: tR dihydrouridine synthase activity%2C FAD binding%2C catalytic activity%3B INVOLVED IN: regulation of nitrogen utilization%2C tR processing%2C oxidation reduction%2C metabolic process%3B LOCATED IN: nucleus%2C cytoplasm%2C phragmoplast%3B EXPRESSED IN: 21 plant structures%3B EXPRESSED DURING: 13 growth stages%3B CONTAINS InterPro DOMAIN/s:…	scaffold_8	version-2	gene	10497424	10500478	0.37	-	.															KK_arenosa	MZ_halleri	DXY	DD	.	.	.	.	.	.	.	.	.	.	.	.	.
AL8G20240	AT5G47970		OG0018851	.	protein_coding	Aldolase-type TIM barrel family protein	.	Aldolase-type TIM barrel family protein%3B FUNCTIONS IN: tR dihydrouridine synthase activity%2C FAD binding%2C catalytic activity%3B INVOLVED IN: regulation of nitrogen utilization%2C tR processing%2C oxidation reduction%2C metabolic process%3B LOCATED IN: nucleus%2C cytoplasm%2C phragmoplast%3B EXPRESSED IN: 21 plant structures%3B EXPRESSED DURING: 13 growth stages%3B CONTAINS InterPro DOMAIN/s:…	.	Aldolase-type TIM barrel family protein%3B FUNCTIONS IN: tR dihydrouridine synthase activity%2C FAD binding%2C catalytic activity%3B INVOLVED IN: regulation of nitrogen utilization%2C tR processing%2C oxidation reduction%2C metabolic process%3B LOCATED IN: nucleus%2C cytoplasm%2C phragmoplast%3B EXPRESSED IN: 21 plant structures%3B EXPRESSED DURING: 13 growth stages%3B CONTAINS InterPro DOMAIN/s:…	scaffold_8	version-2	gene	10497424	10500478	0.37	-	.															KK_arenosa	MZ_halleri	NIELSEN	DD	.	.	.	.	.	.	.	.	.	.	.	.	.
[truncated: 36 more columns]
