# Supplementary material for: Convergent evolution in Arabidopsis halleri and Arabidopsis arenosa on calamine metalliferous soils
Source: Philos Trans R Soc Lond B Biol Sci. 2019 Jun 3;374(1777):20180243. doi: 10.1098/rstb.2018.0243 (PMC6560266; doi:10.1098/rstb.2018.0243)
Supplement: Dataset S7 [file rstb20180243supp18.xlsx]

## Sheet: BetweenContrast_WithinSpecies
Dataset S7. Convergent genes in Arabidopsis halleri, based on DIVERGENCESCAN and environmental association analyses.
AL_ID	AT_ID	GeneID	OrthoGroup	symbol	full_name	note	scaffold	start	end	interval_length	Klet_snps	Kowa_snps	Mias_snps	Zako_snps	KletKowa_EA_SNPs_Cd	KletKowa_EA_SNPs_Zn	MiasZako_EA_SNPs_Cd	MiasZako_EA_SNPs_Zn	contrast	element	KletKowa_N_Cd	KletKowa_N_SNPs_Zn	MiasZako_N_Cd	MiasZako_N_Zn	KletKowa_S_Cd	KletKowa_S_SNPs_Zn	MiasZako_S_SNPs_Cd	MiasZako_EA_SNPs_Zn	KletKowa_stop_gained_Cd	KletKowa_stop_gained_SNPs_Zn	MiasZako_stop_gained_Cd	MiasZako_stop_gained_Zn	Klet_pi	Kowa_pi	Mias_pi	Zako_pi	tajimas_D_Klet	tajimas_D_Kowa	tajimas_D_Mias	tajimas_D_Zako	locus_type	description	curator_summary	computational_description
AL1G34900	AT1G21722	7922432	OG0011603	.	.	transmembrane protein	scaffold_1	9412349	9415373	3024	61	12	83	126	11	11	11	11	KletKowa,MiasZako	Cd,Zn	2	2	2	2	4	4	2	2	0	0	0	0	0.102541	0.0253822	0.210839	0.231932	0.244873	0.109916	1.28898	0.467151	protein_coding	computational_unknown protein; FUNCTIONS IN: molecular_function unknown; INVOLVED IN: biological_process unknown; LOCATED IN: cellular_component unknown; BEST Arabidopsis thaliana protein match is: unknown protein (TAIR:AT1G78922.1); Has 47 Blast hits to 47 proteins in 13 species: Archae - 0; Bacteria - 0; Metazoa - 1; Fungi - 1; Plants - 42; Viruses - 0; Other Eukaryotes - 3 (source: NCBI BLink).	.	unknown protein; FUNCTIONS IN: molecular_function unknown; INVOLVED IN: biological_process unknown; LOCATED IN: cellular_component unknown; BEST Arabidopsis thaliana protein match is: unknown protein (TAIR:AT1G78922.1); Has 47 Blast hits to 47 proteins in 13 species: Archae - 0; Bacteria - 0; Metazoa - 1; Fungi - 1; Plants - 42; Viruses - 0; Other Eukaryotes - 3 (source: NCBI BLink).
AL3G38930	AT3G24250	822012	OG0017035	.	.	glycine-rich protein	scaffold_3	11218638	11221313	2675	32	67	11	91	31	31	31	31	KletKowa,MiasZako	Cd,Zn	7	7	7	7	9	9	7	7	0	0	0	0	0.0367852	0.117915	0.0219745	0.197839	-0.507154	-0.385123	0.0135235	0.452563	protein_coding	computational_glycine-rich protein; FUNCTIONS IN: molecular_function unknown; INVOLVED IN: biological_process unknown; LOCATED IN: endomembrane system; Has 31214 Blast hits to 7346 proteins in 651 species: Archae - 8; Bacteria - 19535; Metazoa - 5600; Fungi - 769; Plants - 2786; Viruses - 317; Other Eukaryotes - 2199 (source: NCBI BLink).	.	glycine-rich protein; FUNCTIONS IN: molecular_function unknown; INVOLVED IN: biological_process unknown; LOCATED IN: endomembrane system; Has 31214 Blast hits to 7346 proteins in 651 species: Archae - 8; Bacteria - 19535; Metazoa - 5600; Fungi - 769; Plants - 2786; Viruses - 317; Other Eukaryotes - 2199 (source: NCBI BLink).
AL3G53910	AT2G20800	816609	OG0022718	NDB4	NAD(P)H dehydrogenase B4	NAD(P)H dehydrogenase B4	scaffold_3	24042000	24046627	4627	38	102	41	77	11	11	11	11	KletKowa,MiasZako	Cd,Zn	1	1	1	1	7	7	1	1	0	0	0	0	0.0768966	0.159014	0.0494624	0.10878	0.847169	0.235205	-0.16496	0.115179	protein_coding	computational_NAD(P)H dehydrogenase B4 (NDB4); FUNCTIONS IN: NADH dehydrogenase activity; INVOLVED IN: oxidation reduction; LOCATED IN: extrinsic to mitochondrial inner membrane, mitochondrion, plastid; EXPRESSED IN: 7 plant structures; CONTAINS InterPro DOMAIN/s: Pyridine nucleotide-disulphide oxidoreductase, class-II (InterPro:IPR000103), FAD-dependent pyridine nucleotide-disulphide oxidoreduct…	.	NAD(P)H dehydrogenase B4 (NDB4); FUNCTIONS IN: NADH dehydrogenase activity; INVOLVED IN: oxidation reduction; LOCATED IN: extrinsic to mitochondrial inner membrane, mitochondrion, plastid; EXPRESSED IN: 7 plant structures; CONTAINS InterPro DOMAIN/s: Pyridine nucleotide-disulphide oxidoreductase, class-II (InterPro:IPR000103), FAD-dependent pyridine nucleotide-disulphide oxidoreductase (InterPro:…
AL5G24630	.	.	OG0001493	.	.	Alpha-D-xyloside xylohydrolase	scaffold_5	12307386	12312158	4772	44	93	68	95	19	19	19	19	KletKowa,MiasZako	Cd,Zn	4	4	4	4	15	15	4	4	0	0	0	0	0.0654749	0.19013	0.139336	0.15313	-0.207545	0.328469	0.110414	-0.429307	.	.	.	.
AL6G23510	AT5G12940	831134	OG0010023	.	.	DNA-DAMAGE-REPAIR/TOLERATION PROTEIN DRT100-RELATED	scaffold_6	5157272	5160714	3442	2	24	50	56	1	1	1	1	KletKowa,MiasZako	Cd,Zn	1	1	1	1	0	0	1	1	0	0	0	0	0.0021978	0.0821852	0.143356	0.157552	-0.0540945	-0.00885582	-0.191489	-0.182731	protein_coding	computational_Leucine-rich repeat (LRR) family protein; INVOLVED IN: signal transduction; LOCATED IN: endomembrane system; EXPRESSED IN: 18 plant structures; EXPRESSED DURING: 10 growth stages; CONTAINS InterPro DOMAIN/s: Leucine-rich repeat-containing N-terminal domain, type 2 (InterPro:IPR013210), Leucine-rich repeat (InterPro:IPR001611); BEST Arabidopsis thaliana protein match is: Leucine-rich…	.	Leucine-rich repeat (LRR) family protein; INVOLVED IN: signal transduction; LOCATED IN: endomembrane system; EXPRESSED IN: 18 plant structures; EXPRESSED DURING: 10 growth stages; CONTAINS InterPro DOMAIN/s: Leucine-rich repeat-containing N-terminal domain, type 2 (InterPro:IPR013210), Leucine-rich repeat (InterPro:IPR001611); BEST Arabidopsis thaliana protein match is: Leucine-rich repeat (LRR) …
AL8G32870	.	.	OG0021089	CPL-1	.	Cysteine Protease Like 1	scaffold_8	17837924	17842476	4552	39	79	38	76	31	31	31	31	KletKowa,MiasZako	Cd,Zn	6	6	6	6	5	5	6	6	0	0	0	0	0.0540872	0.135908	0.0702242	0.153126	-0.262738	-0.189671	0.0559194	0.379441	.	.	.	.
AL8G32880	AT5G56200	.	OG0002224	.	.	hypothetical protein AXX17 (97% of query, 70% identity blastp)	scaffold_8	17842726	17846350	3624	38	119	13	136	19	19	19	19	KletKowa,MiasZako	Cd,Zn	3	3	3	3	5	5	3	3	0	0	0	0	0.0252487	0.271429	0.0142319	0.285734	-0.962829	1.11931	-0.142454	1.07329	.	.	.	.

## Sheet: Description
Bold names are inferred from phytozome, lyrata v2.0
Summary of between contrasts within species candidate genes
Bold indicates orthologs found by BLAST searches of the Arabidopsis lyrata version 2 reference sequence
Tajima’s D values are not standardised, to put in context we have to compare them to the population and genome wide distribution
EA_SNP means Environmentally Associated SNP (BF≤100)
N_SNP means non-synonymous SNP
S_SNP means synonymous SNP
