# Supplementary material for: Convergent evolution in Arabidopsis halleri and Arabidopsis arenosa on calamine metalliferous soils
Source: PubMed Central journal article supplement (PMC6560266; doi:10.1098/rstb.2018.0243), 2019-06-03
Supplement: rstb20180243supp1.pdf [file rstb20180243supp1.pdf]

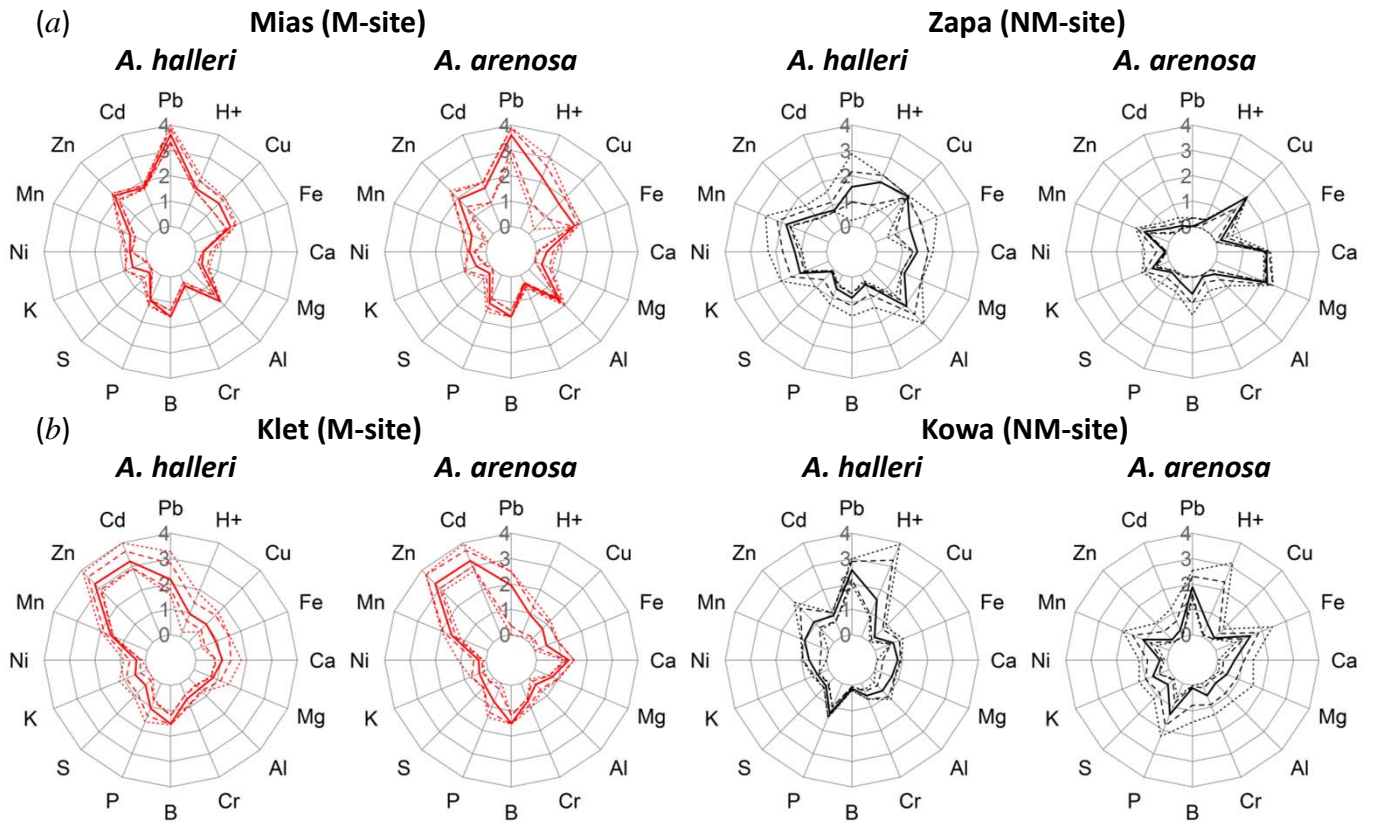

Figure S1. Mineral composition of extractable fraction of soils, and soil pH. (a) Site pair of Miasteczko Śląskie (Mias) and Zakopane (Zapa), (b) Site pair of Kletno (Klet) and Kowary (Kowa). The concentrations of multiple elements were determined in 0.1 M HCl extracts of soils collected directly adjacent to roots of the plant individuals sampled for this study (see Methods). Concentrations [mg element kg<sup>-1</sup> dry soil mass] were normalized to the global minimum per site pair across both species, and subsequently Log<sub>10</sub>-transformed. Shown are the median (solid line), 10 and 90%iles (dashed lines), minimum and maximum (dotted lines) for each site per species ( $n = 5$  to 9 plant individuals) for metalliferous (M, red colour) and non-metalliferous (NM, black colour) soil types. Soil pH is re-plotted here from figure 1.
