# Supplementary material for: Convergent evolution in Arabidopsis halleri and Arabidopsis arenosa on calamine metalliferous soils
Source: PubMed Central journal article supplement (PMC6560266; doi:10.1098/rstb.2018.0243), 2019-06-03
Supplement: rstb20180243supp2.pdf [file rstb20180243supp2.pdf]

(a)

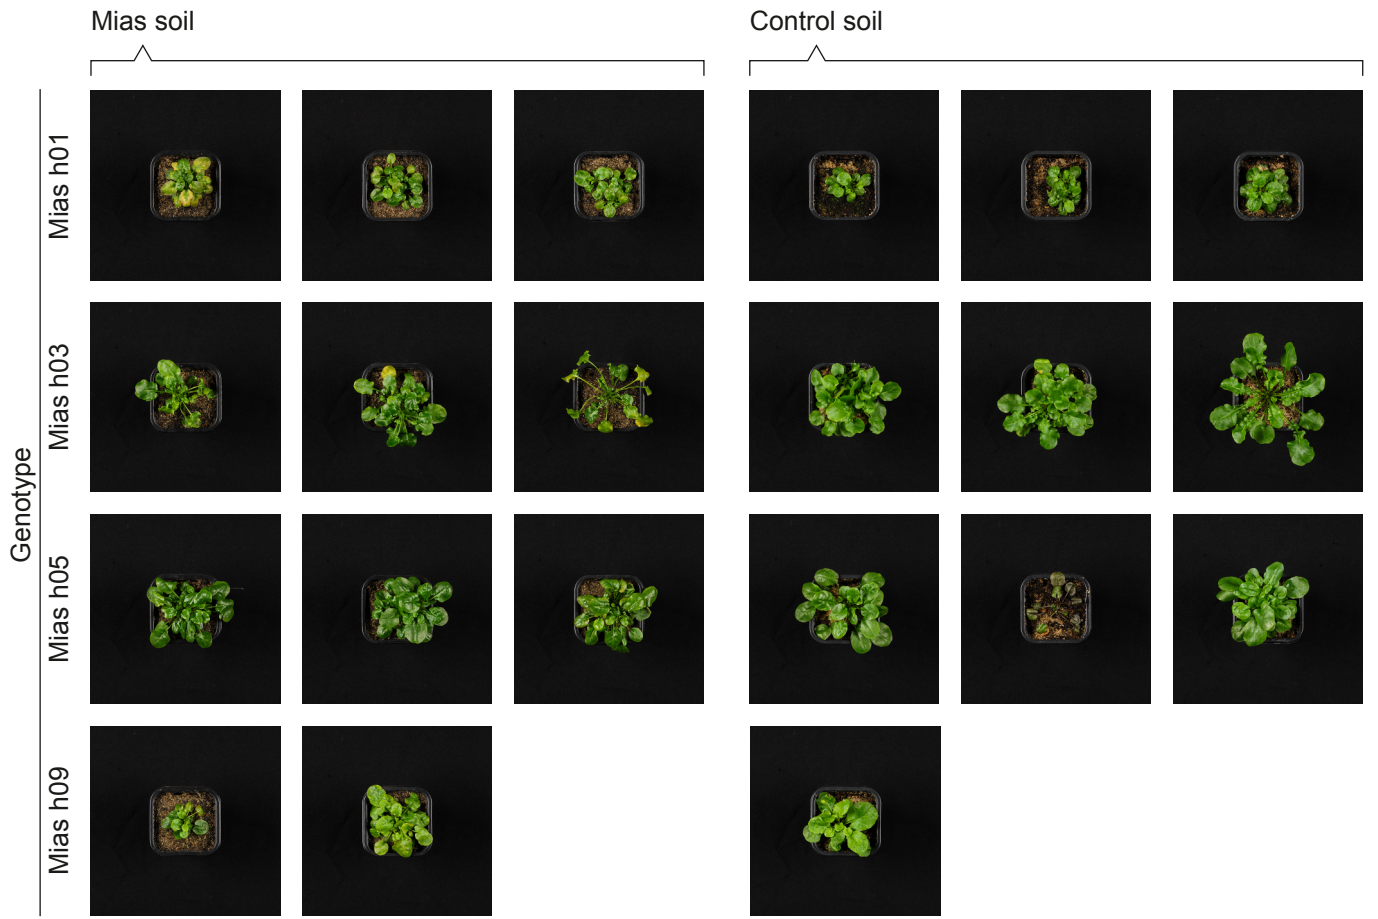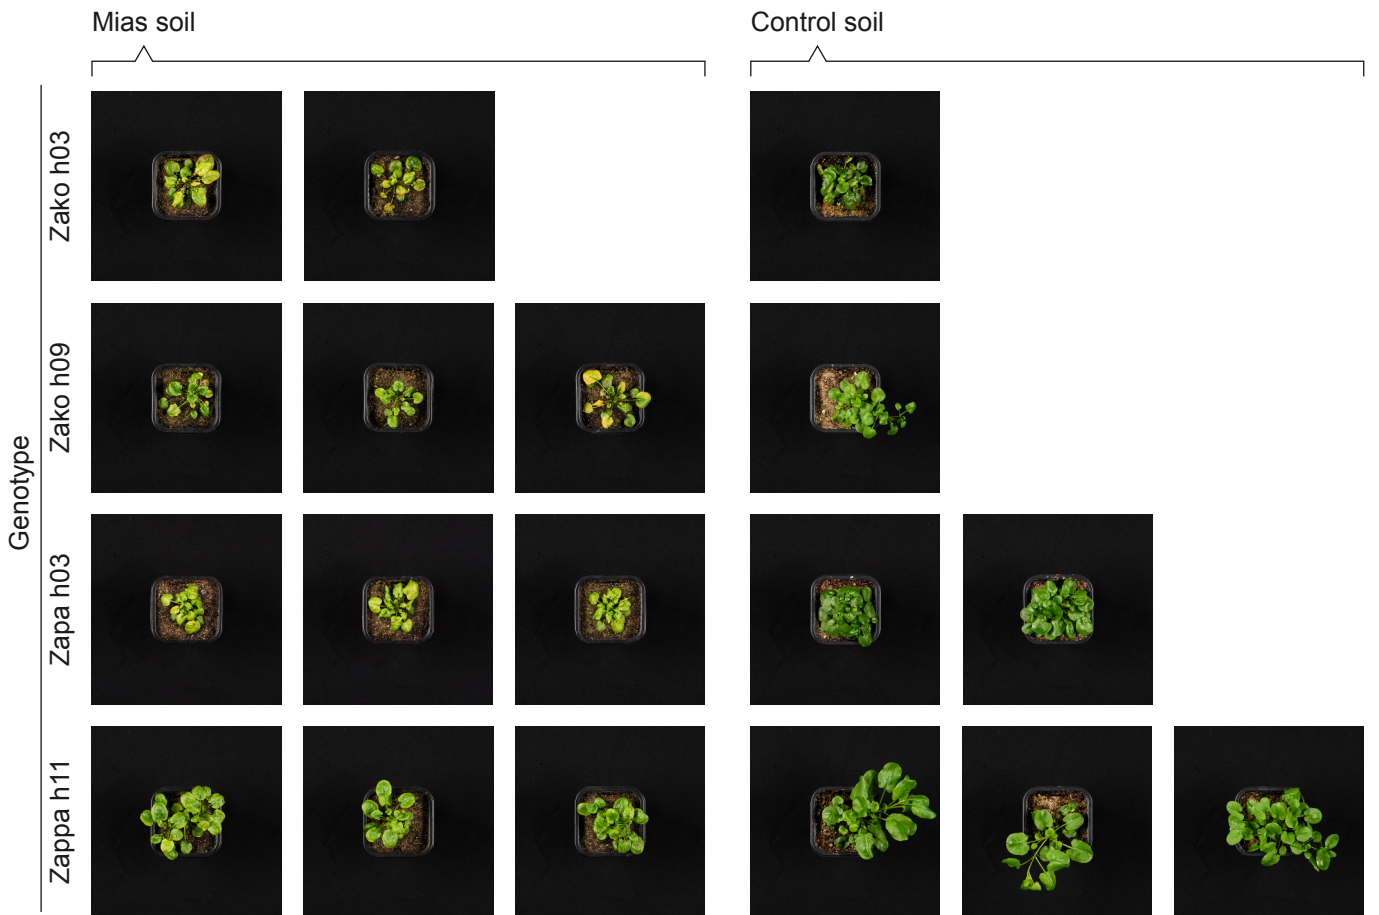

(b)

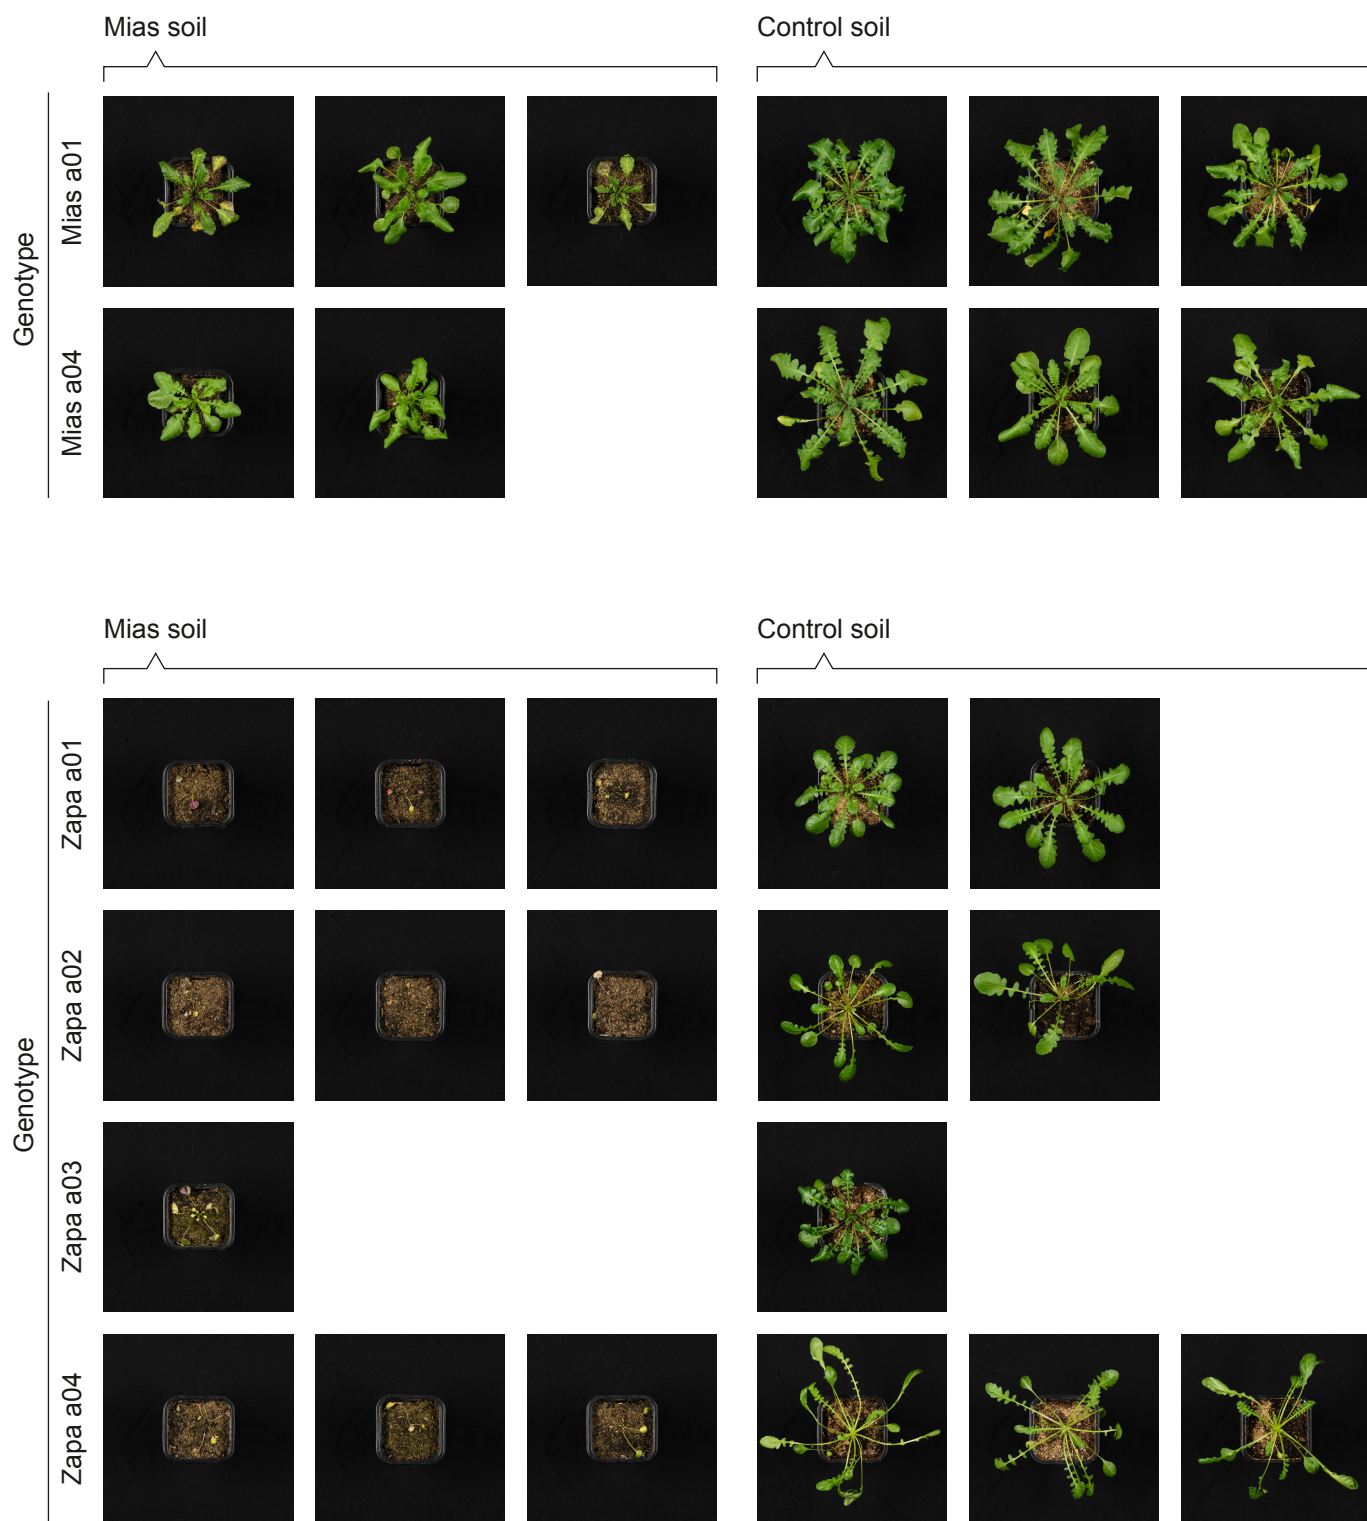

**Figure S2.** Photographs of plants in experiment testing for plant adaptation to metalliferous soil. (a) *A. halleri*, (b) *A. arenosa*. Photographs were taken of plants on the day of harvest (see figure 2).
