# Supplementary material for: Convergent evolution in Arabidopsis halleri and Arabidopsis arenosa on calamine metalliferous soils
Source: PubMed Central journal article supplement (PMC6560266; doi:10.1098/rstb.2018.0243), 2019-06-03
Supplement: rstb20180243supp3.pdf [file rstb20180243supp3.pdf]

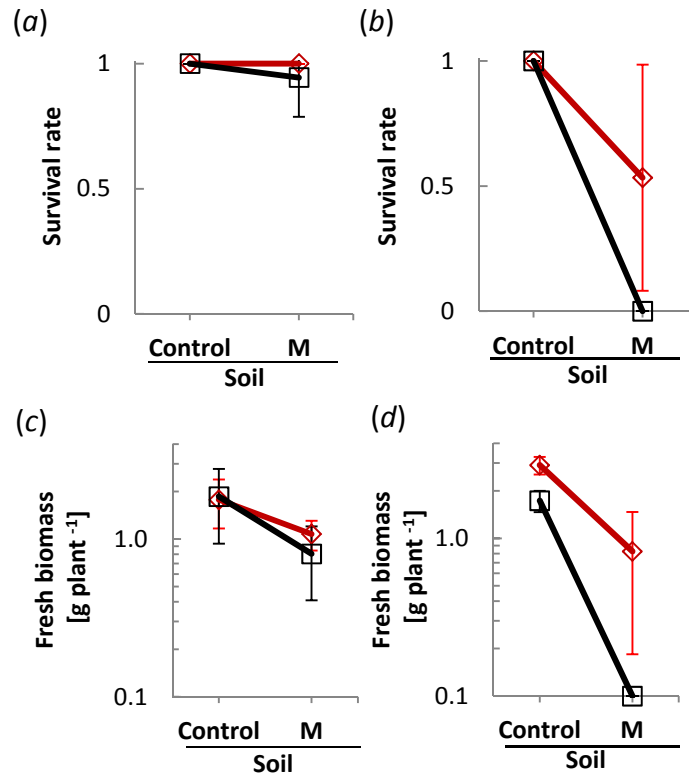

**Figure S3.** Independent experiment addressing local adaptation to metalliferous soil. (a,b) Survival of *A. halleri* (a) and *A. arenosa* (b) plants originating from Mias (M site, red colour) and Zapa (NM site, black colour) transferred into metalliferous (Mias) or non-metalliferous (control) soil. (c,d) Fresh biomass of *A. halleri* (c) and *A. arenosa* (d) plants originating from Mias (M site, red colour) and Zapa (NM site, black colour) transferred into metalliferous (Mias) or non-metalliferous (control) soil. Shown are means and standard deviation of survival rate (a,b) and fresh above-ground biomass (c,d) after 6 w of cultivation on experimental soils (see table S4 for details).
