# Supplementary material for: Convergent evolution in Arabidopsis halleri and Arabidopsis arenosa on calamine metalliferous soils
Source: PubMed Central journal article supplement (PMC6560266; doi:10.1098/rstb.2018.0243), 2019-06-03
Supplement: rstb20180243supp4.pdf [file rstb20180243supp4.pdf]

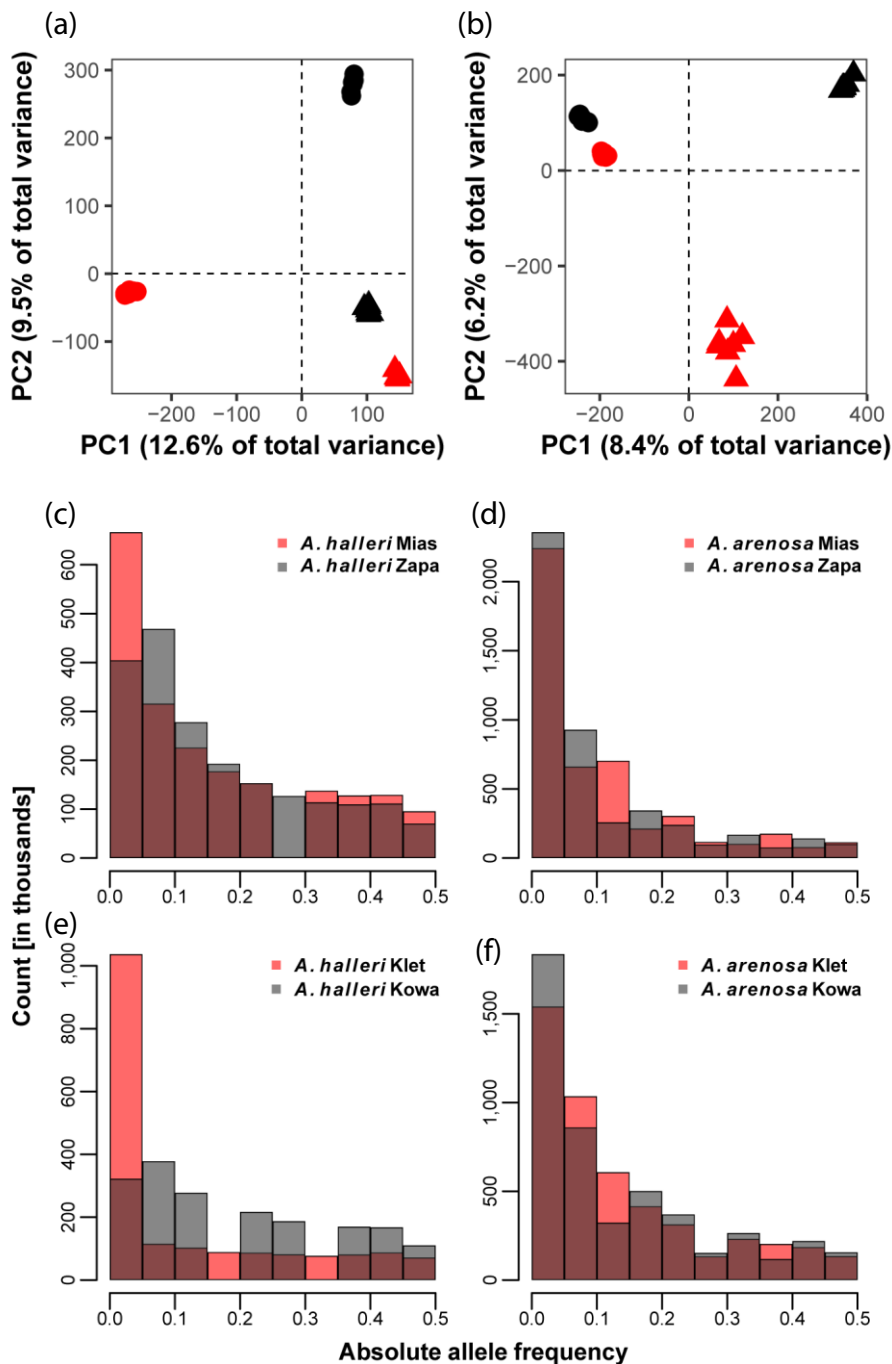

Figure S4. Population structure. (a, b) Principal component analysis of neutral population structure in *A. halleri* (a) and *A. arenosa* (b), based on putatively neutral four-fold degenerate sites (329,044 SNPs and 34 individuals for *A. halleri*, 699,168 SNPs and 31 individuals for *A. arenosa*). Each datapoint represents one plant individual sampled at a metalliferous (red symbols) or a non-metalliferous (black symbols) site of the Mias-Zapa (triangles) or Klet-Kowa (circles) population pair. (c-f) Folded site frequency spectra based on all SNPs at Mias-Zapa in *A. halleri* (c) and *A. arenosa* (d), and Klet-Kowa in *A. halleri* (e) and *A. arenosa* (f). Metalliferous sites are shown in red, non-metalliferous sites in grey.
