# Supplementary material for: Convergent evolution in Arabidopsis halleri and Arabidopsis arenosa on calamine metalliferous soils
Source: PubMed Central journal article supplement (PMC6560266; doi:10.1098/rstb.2018.0243), 2019-06-03
Supplement: rstb20180243supp5.pdf [file rstb20180243supp5.pdf]

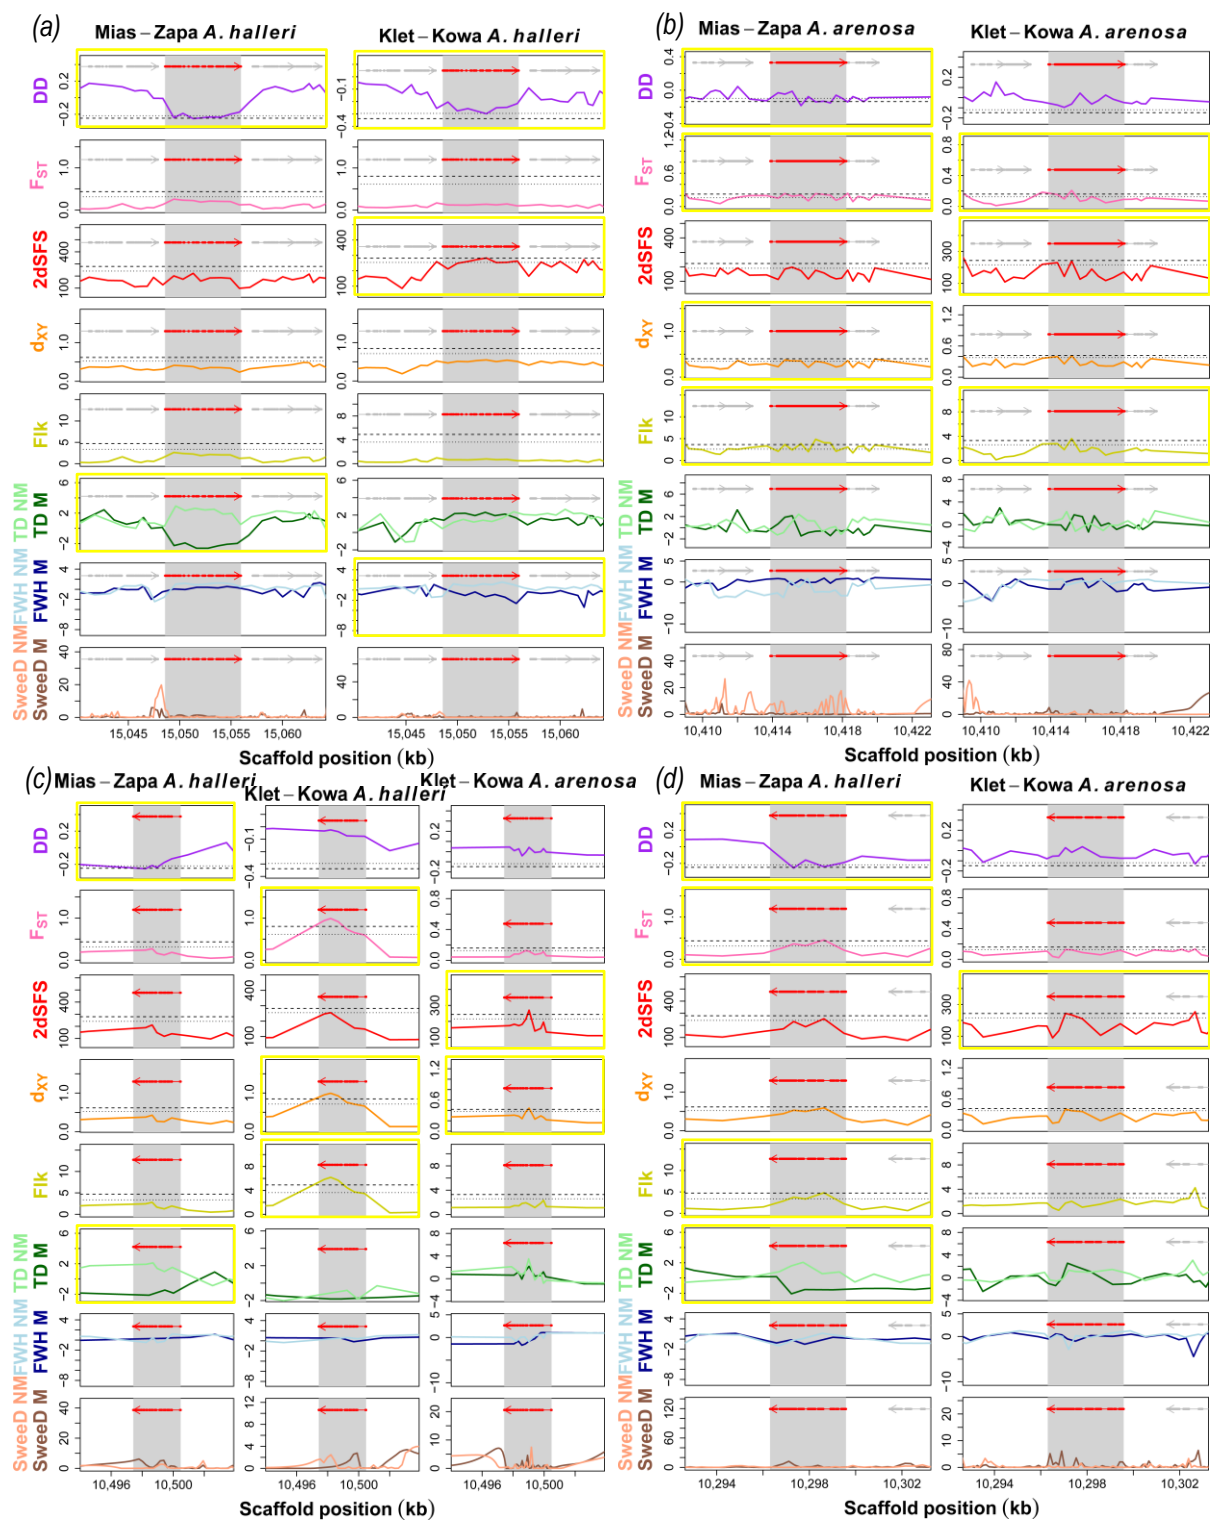

**Figure S5.** Evidence for selection on convergent genes. Lines connect datapoints, each representing the centre of a 25-SNP window, for a series of metrics for the respective population pairs for (a) A12g31400, (b) A17g35050, (c) A18g20240, (d) A16g35310. The dashed/dotted lines mark the 0.1%/0.5% genome-wide outliers. Thick/thin lines reflect exons/introns of candidate (red arrow, grey background) and neighbouring genes.
