# Supplementary material for: Convergent evolution in Arabidopsis halleri and Arabidopsis arenosa on calamine metalliferous soils
Source: PubMed Central journal article supplement (PMC6560266; doi:10.1098/rstb.2018.0243), 2019-06-03
Supplement: rstb20180243supp6.pdf [file rstb20180243supp6.pdf]

|              |                         |                                      |                             |                         |                    |                                      |                                      |                                      |
|--------------|-------------------------|--------------------------------------|-----------------------------|-------------------------|--------------------|--------------------------------------|--------------------------------------|--------------------------------------|
| Exon number  | 222222222               | 222222222                            | 223333333                   | 333333333               | 334444444          | 444444444                            | 444445555                            | 555555555                            |
|              | .... ....               | .... ....                            | .... ....                   | .... ....               | .... ....          | .... ....                            | .... ....                            | .... ....                            |
|              | 5                       | 15                                   | 25                          | 35                      | 45                 | 55                                   | 65                                   | 75                                   |
| A. lyrata t2 | MFTRSNRKGG              | GGNGE <b>E</b> KKNR                  | FTAE <b>E</b> KG <b>G</b> K | MPSKSSKEEL              | <b>W</b> ELPPSWDWR | DYPGVIGPVM                           | <b>N</b> Q <b>K</b> L <b>Q</b> GFCTA | SQCTPNTRDN                           |
| Klet         | MFTRSNRKGG              | GGNGE <b>E</b> RKNR                  | FTAE <b>E</b> KG <b>E</b> K | MPSKSSKEES              | <b>S</b> ELPPSWDWR | DYPGVIGPVM                           | <b>N</b> Q <b>K</b> L <b>Q</b> GFCTA | SQCTPNTRDN                           |
| Kowa         | MFTRSNRKGG              | GGNGE <b>E</b> NKNR                  | FTAE <b>E</b> KG <b>G</b> K | MPSKSSKEES              | <b>A</b> ELPPSWDWR | DYPGVIGPVM                           | <b>N</b> Q <b>K</b> L <b>E</b> GFCTA | SQCTPNTRDN                           |
| Mias         | MFTRSNRKGG              | GGNGE <b>E</b> RKNR                  | FTAE <b>E</b> KG <b>E</b> K | MPSKSSKEES              | <b>S</b> ELPPSWDWR | DYPGVIGPVM                           | <b>N</b> Q <b>K</b> L <b>Q</b> GFCTA | SQCTPNTRDN                           |
| Zapa         | MFTRSNRKGG              | GGNGE <b>E</b> NKNR                  | FTAE <b>E</b> KG <b>G</b> K | MPSKSSKEES              | <b>A</b> ELPPSWDWR | DYPGVIGPVM                           | <b>N</b> Q <b>K</b> L <b>E</b> GFCTA | SQCTPNTRDN                           |
| Exon number  | 555555555               | 555666666                            | 666666666                   | 666666666               | 666666666          | 666666667                            | 777777777                            | 777777777                            |
|              | .... ....               | .... ....                            | .... ....                   | .... ....               | .... ....          | .... ....                            | .... ....                            | .... ....                            |
|              | 85                      | 95                                   | 105                         | 115                     | 125                | 135                                  | 145                                  | 155                                  |
| A. lyrata t2 | NVFKKL <sup>U</sup> CRH | PD <b>N</b> I <b>H</b> <b>Y</b> -IKV | DEFEYLTNVN                  | DEELQAI <sup>V</sup> VQ | QPVIGILRNT         | <b>N</b> DE <b>F</b> L <b>A</b> IGSG | IYRSPSGDVD                           | <b>V</b> N <b>F</b> H <b>Q</b> VLIIG |
| Klet         | NVFKKL <sup>U</sup> CRH | PD <b>N</b> I <b>H</b> <b>Y</b> NIKV | DEFEYLTNVN                  | DEELQAI <sup>V</sup> VQ | QPVIGILRNT         | <b>N</b> DD <b>F</b> L <b>G</b> IGSG | IYRSPSGDVD                           | <b>I</b> N <b>F</b> H <b>Q</b> VLIIG |
| Kowa         | NVFKKL <sup>U</sup> CRH | PD <b>K</b> I <b>H</b> <b>T</b> -IKV | DEFEYLTNVN                  | DEELQAI <sup>V</sup> VQ | QPVIGILRNT         | <b>N</b> DD <b>F</b> L <b>A</b> IGSG | IYRSPSGDVD                           | <b>V</b> N <b>F</b> H <b>Q</b> VLIIG |
| Mias         | NVFKKL <sup>U</sup> CRH | PD <b>N</b> I <b>H</b> <b>Y</b> -IKV | DEFEYLTNVN                  | DEELQAI <sup>V</sup> VQ | QPVIGILRNT         | <b>N</b> R <b>D</b> F <b>L</b> GIGSG | IYRSPSGDVD                           | <b>I</b> N <b>F</b> H <b>Q</b> VLIIG |
| Zapa         | NVFKKL <sup>U</sup> CRH | PD <b>K</b> I <b>H</b> <b>T</b> -IKV | DEFEYLTNVN                  | DEELQAI <sup>V</sup> VQ | QPVIGILRNT         | <b>N</b> DD <b>F</b> L <b>A</b> IGSG | IYRSPSGDVD                           | <b>V</b> N <b>F</b> H <b>Q</b> VLIIG |
| Exon number  | 777777777               | 777777777                            | 777777777                   | 777777777               | 777777777          | 77777777                             | 77777777                             |                                      |
|              | .... ....               | .... ....                            | .... ....                   | .... ....               | .... ....          | .... ....                            | .... ....                            |                                      |
|              | 165                     | 175                                  | 185                         | 195                     | 205                | 215                                  |                                      |                                      |
| A. lyrata t2 | YGYD <b>--</b> NGKP     | YWIIQ <b>N</b> SYGE                  | GWGNGGFGYV                  | YRRI <b>K</b> SGQGS     | <b>E</b> FFAVAYPKI | RG <b>F</b> PRK <b>P</b> R*          |                                      |                                      |
| Klet         | YGYD <b>D</b> SNGKP     | YWIIQ <b>N</b> SYGE                  | GWGNGGFGYV                  | YRRI <b>N</b> SGQGS     | <b>E</b> FFAVAYPKI | RG <b>Y</b> PRK <b>P</b> R*          |                                      |                                      |
| Kowa         | YGYD <b>--</b> NGKP     | YWIIQ <b>N</b> SYGE                  | GWGNGGFGYV                  | YRRI <b>K</b> SGQGS     | <b>V</b> FFAVAYPKI | RG <b>F</b> PRK <b>Q</b> R*          |                                      |                                      |
| Mias         | YGYD <b>D</b> SNGKP     | YWIIQ <b>N</b> SYGE                  | GWGNGGFGYV                  | YRRI <b>N</b> SGQGS     | <b>E</b> FFAVAYPKI | RG <b>Y</b> PRK <b>P</b> R*          |                                      |                                      |
| Zapa         | YGYD <b>--</b> NGKP     | YWIIQ <b>N</b> SYGE                  | GWGNGGFGYV                  | YRRI <b>K</b> SGQGS     | <b>E</b> FFAVAYPKI | RG <b>F</b> PRK <b>P</b> R*          |                                      |                                      |

**Figure S6.** Alignment of the predicted variants of the *A. halleri* Cysteine Protease-Like 1 (CPL1) protein. Shown are the conceptually translated consensus coding sequences of AL8G32870 from two metallicolous (Klet and Mias) and two non-metallicolous (Kowa and Zapa) populations of *A. halleri* based on the *A. lyrata* genome annotation version 2.1 (transcript variant t2). Amino acids that are polymorphic among the five genotypes are printed in bold type, with those common to both metalliferous (M) sites shown in red fonts and those common to both non-metalliferous (NM) sites shown in blue fonts, and highlighted in yellow when M populations share derived alleles. A grey bar above the alignment marks the PF00112 papain family cysteine protease domain. Catalytic residues are underlined.
