# Supplementary material for: Convergent evolution in Arabidopsis halleri and Arabidopsis arenosa on calamine metalliferous soils
Source: PubMed Central journal article supplement (PMC6560266; doi:10.1098/rstb.2018.0243), 2019-06-03
Supplement: rstb20180243supp7.pdf [file rstb20180243supp7.pdf]

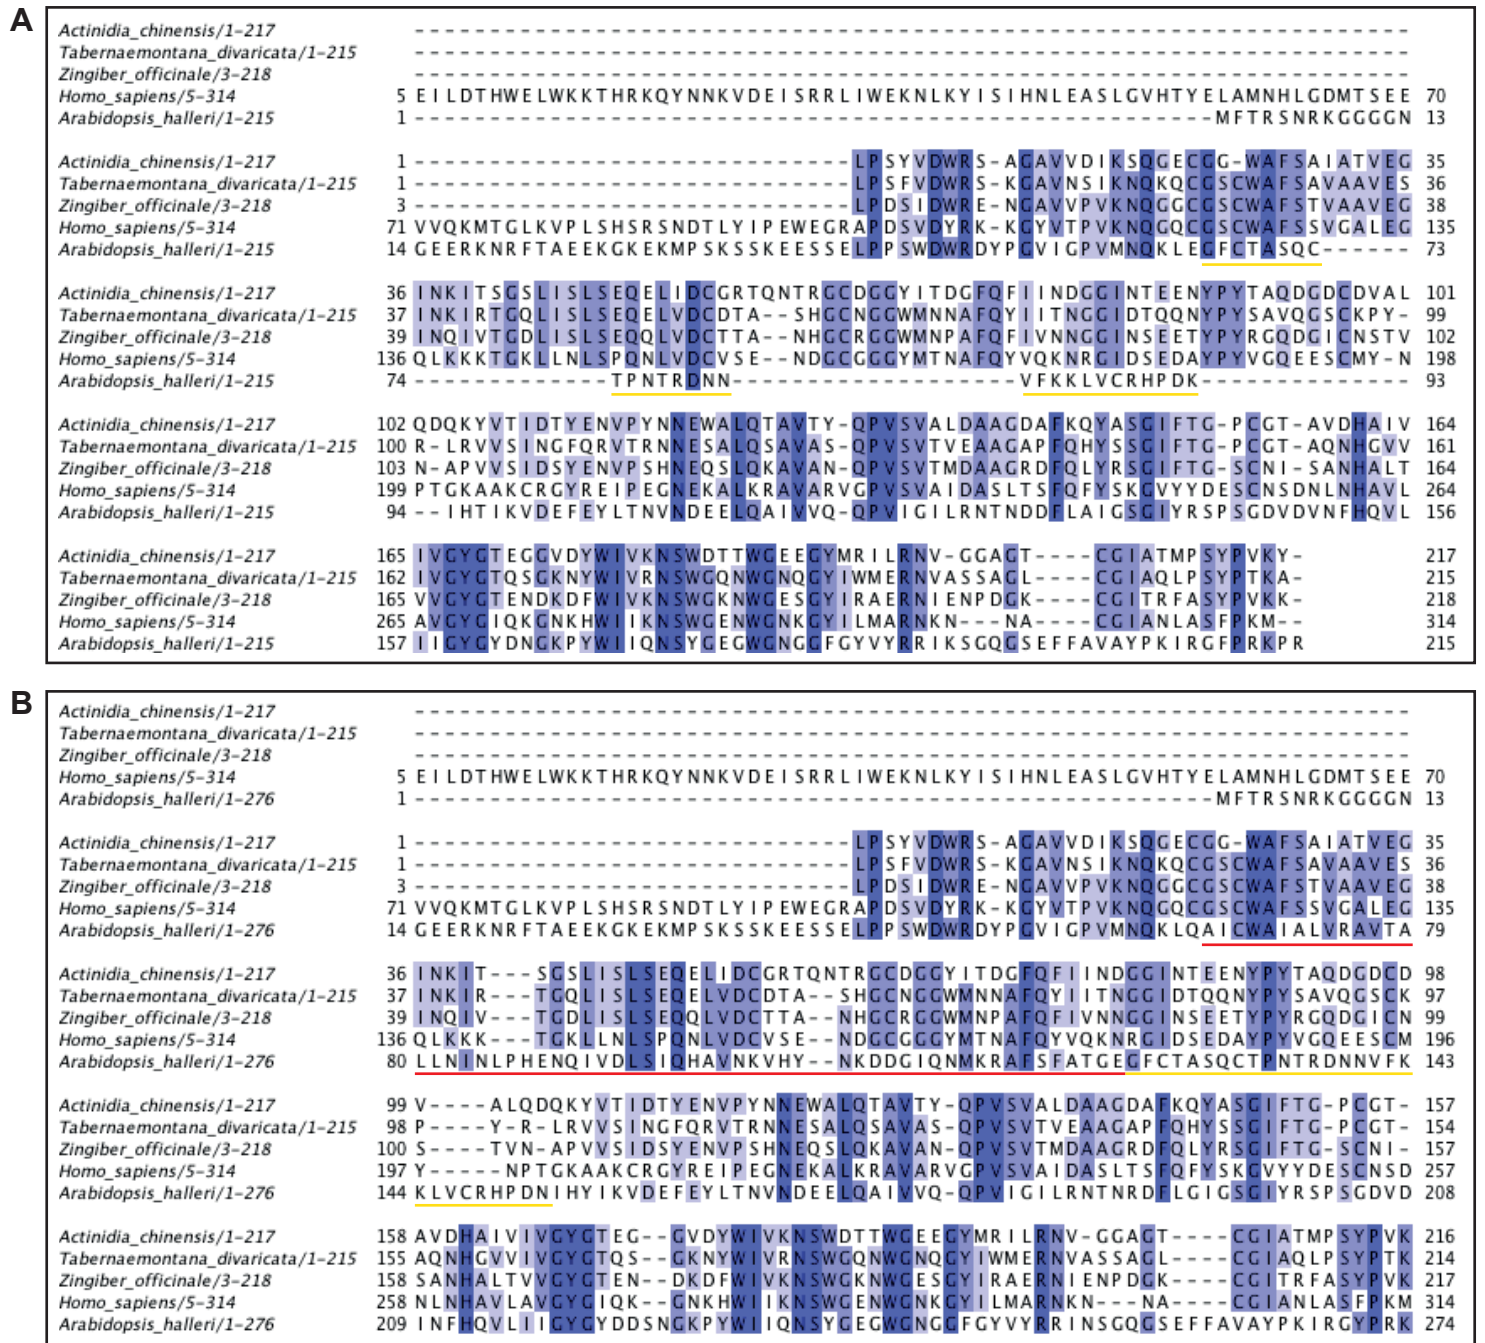

**Figure S7.** Multiple sequence alignment (MSA) of Papain-like cysteine proteases. Shown are *Arabidopsis halleri* (AhCPL1), *Actinidia chinensis* (PDB: 2ACT), *Tabernaemontana divaricata* (PDB: 1IWD), *Zingiber officinale* (PDB: 1CQD) and *Homo sapiens* (PDB: 1BY8). **A**, MSA showing the AhCPL1 protein generated by mapping to *A. lyrata* exons. **B**, MSA showing the AhCPL1 protein homo sapiens based on *A. halleri*. Sequence incorporated based on the genome of *A. halleri* instead of *A. lyrata* is underlined in red. Sequence repositioned based on *A. halleri* sequence data is underlined in yellow.
